# Supplementary material for: Characterization of missing human genome sequences and copy-number polymorphic insertions
Source: Springer Nature journal article supplement (doi:10.1038/nmeth.1451), 2010-04-18
Supplement: 41592_2010_BFnmeth1451_MOESM594_ESM.pdf [file 41592_2010_BFnmeth1451_MOESM594_ESM.pdf]

## Characterization of missing human genome sequences and copy-number polymorphic insertions

Jeffrey M Kidd, Nick Sampas, Francesca Antonacci, Tina Graves, Robert Fulton, Hillary S Hayden, Can Alkan, Maika Malig, Mario Ventura, Giuliana Giannuzzi, Joelle Kallicki, Paige Anderson, Anya Tsalenko, N Alice Yamada, Peter Tsang, Rajinder Kaul, Richard K Wilson, Laurakay Bruhn & Evan E Eichler

Supplementary figures and text:

|                        |                                                       |
|------------------------|-------------------------------------------------------|
| Supplementary Note     | Detailed descriptions of methods                      |
| Supplementary Figure 1 | Genomic distribution of novel insertions              |
| Supplementary Figure 2 | FISH mapping of NA15510 assembled contigs             |
| Supplementary Figure 3 | Distribution of FST values for novel sequence contigs |
| Supplementary Figure 4 | Comparison of VST and FST                             |
| Supplementary Figure 5 | Annotated images of sequenced insertions              |
| Supplementary Figure 6 | Size distribution for sequenced insertions            |
| Supplementary Figure 7 | Distribution of constraint for conserved elements     |
| Supplementary Table 2  | Map locations of anchored loci                        |
| Supplementary Table 3  | FISH analysis of orphan clones                        |
| Supplementary Table 5  | Noise-multiplier results                              |
| Supplementary Table 9  | Novel insertions with high VST                        |
| Supplementary Table 11 | Composition of sequenced insertions                   |
| Supplementary Table 12 | Comparison of sequenced insertions with GRCh37        |

*Note: Supplementary Tables 1, 4, 6–8, 10, 12 and 14 are available on the Nature Methods website.*

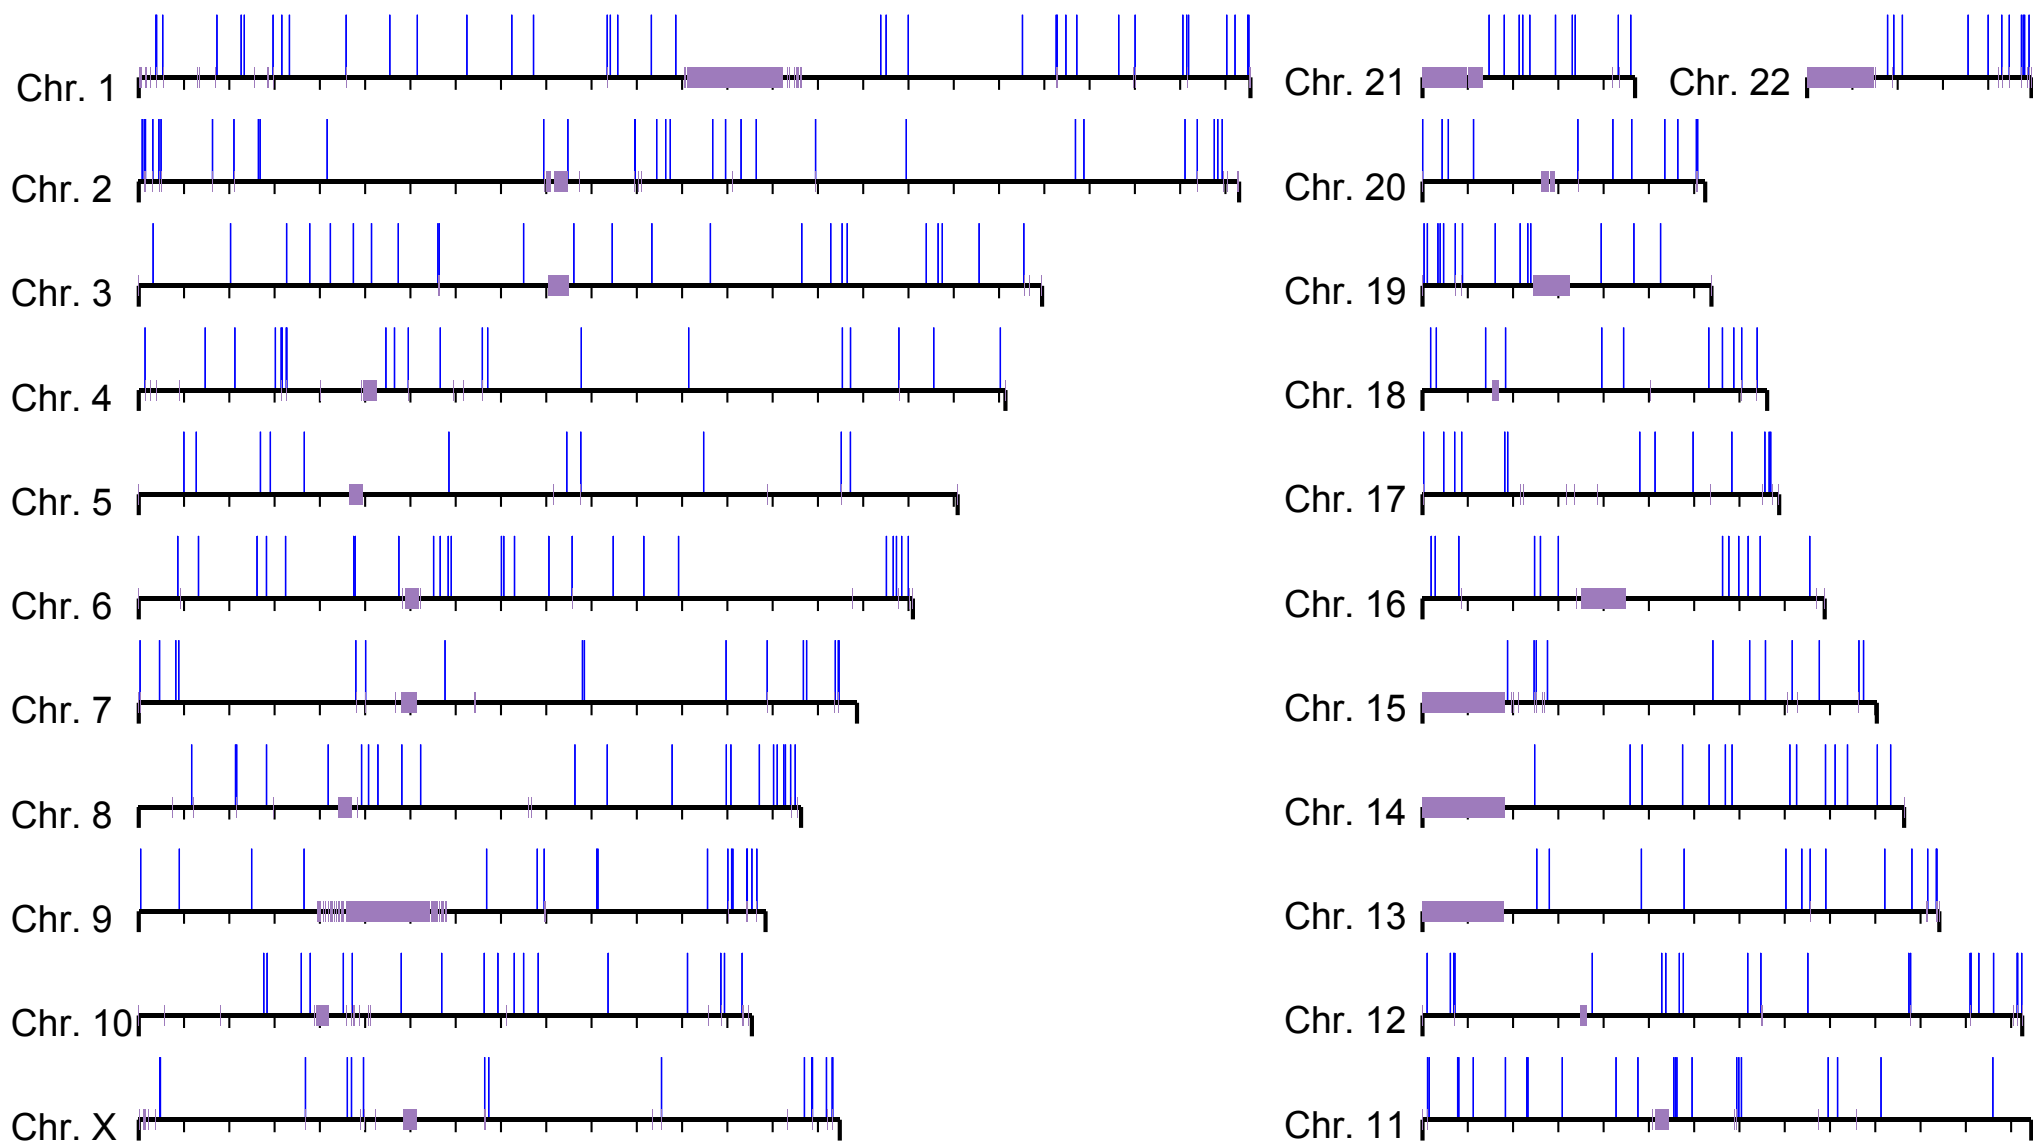

**Supplementary Figure 1** Genomic distribution of novel insertions

The diagram depicts the locations (blue lines) of 400 new insertion loci mapped to the human genome (build35) by one-end anchored end-sequence placements. Purple boxes represent locations of known gaps.

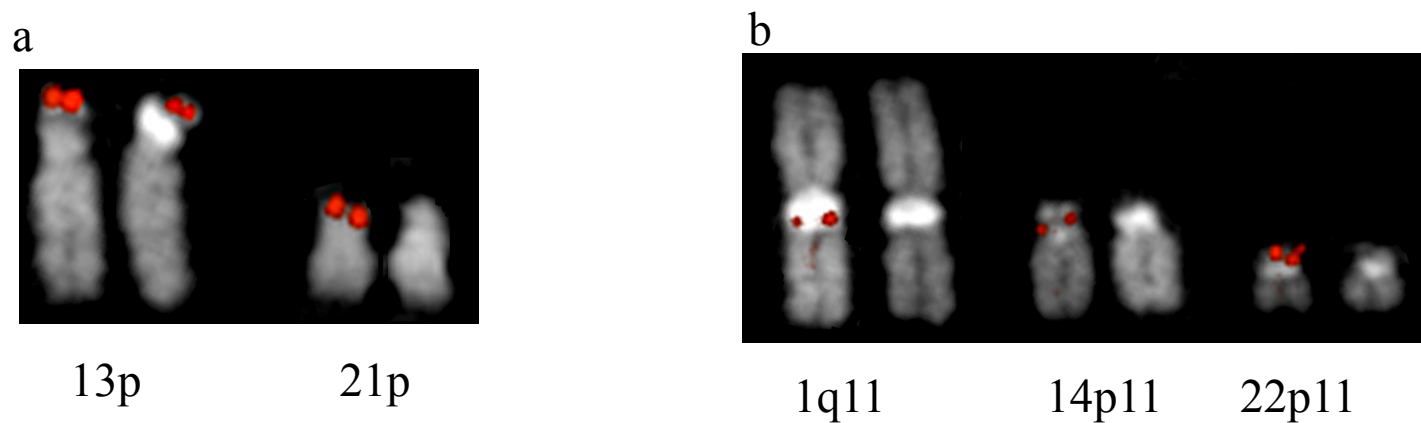

**Supplementary Figure 2** FISH mapping of NA15510 assembled contigs

(a) Contig #74 (probe WIBR2-3212B04) maps to 13p and 21p. (b) Contig #140 (probe WIBR2-1011K06) maps to 1q11, 14p11, and 22p11. Note that in both cases hybridization does not occur on each homologous chromosome, indicating that the contigs are copy-number polymorphic.

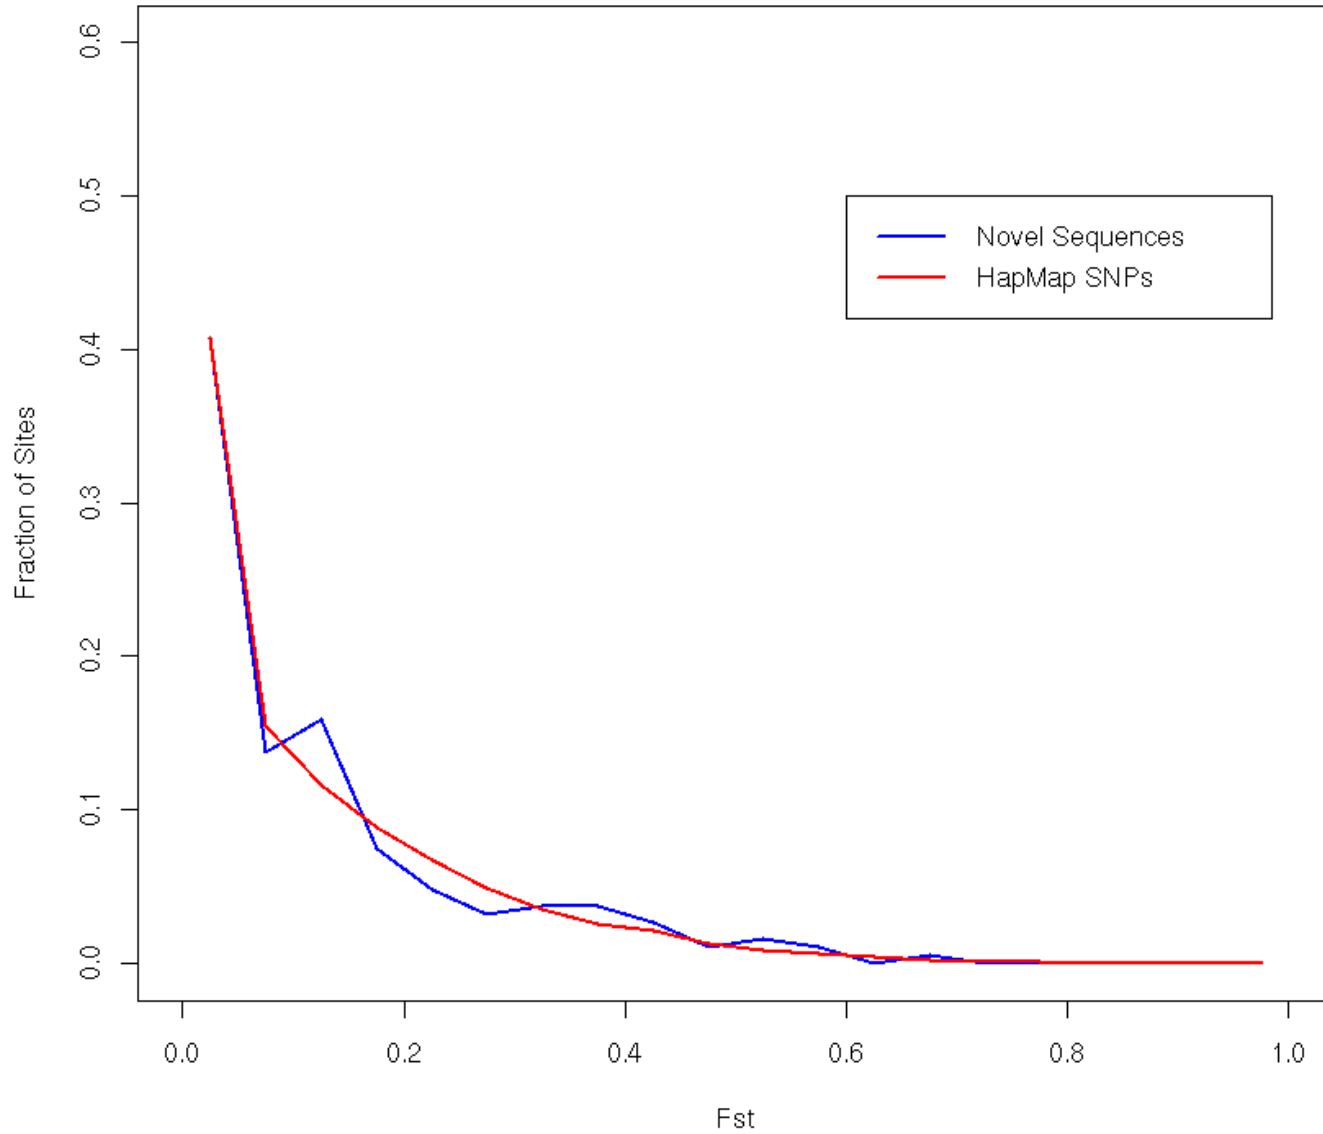

**Supplementary Figure 3** Distribution of  $F_{ST}$  values for novel sequence contigs. Global  $F_{ST}$  was calculated for 189 loci with contigs that form bi-allelic genotypes (blue line), as well as for 2,122,433 HapMap SNPs that are polymorphic in the same individuals (red line).



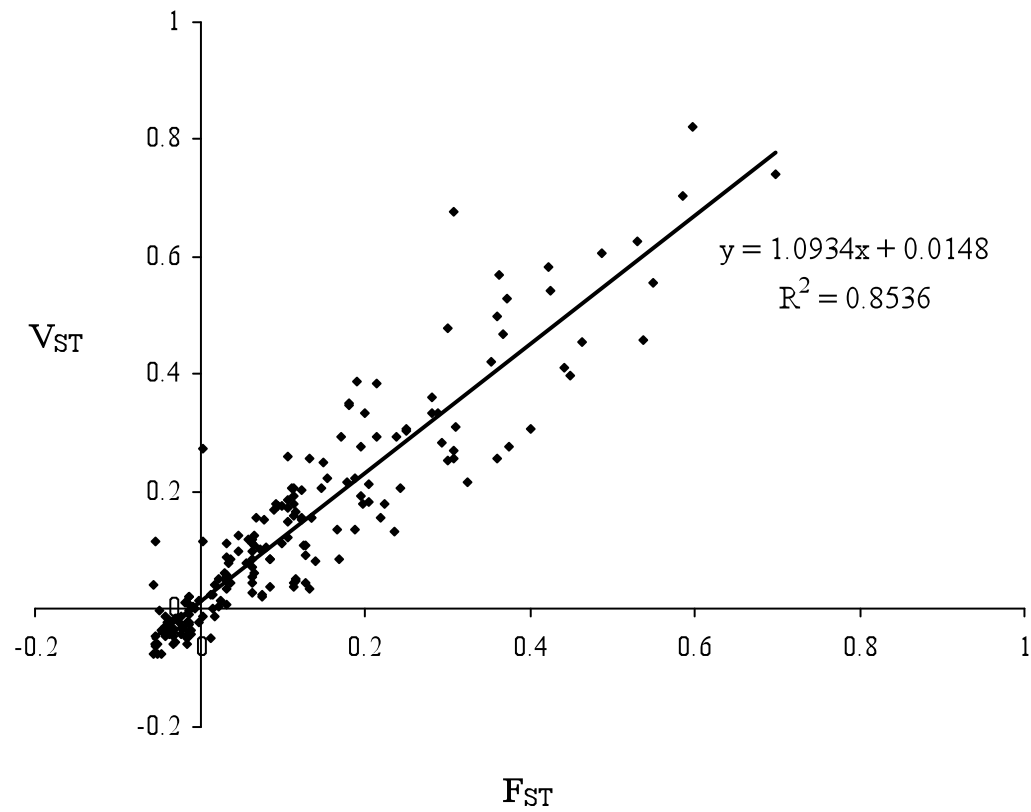

**Supplementary Figure 4** Comparison of  $V_{ST}$  and  $F_{ST}$   
Values are shown for one contig from each of the 189 loci used in Supplementary Figure 3

**Supplementary Figure 5** Annotated images of sequenced insertions

The sequence of each fosmid insert (lower black line) is compared against the build36 genome assembly (upper black line). Black boxes and lines connect matching sequence segments. The magenta lines indicate the breakpoints determined by sequence alignment. When applicable, yellow boxes indicate the extent of matching sequence on each side of the insertion, and the blue box indicates uncertainty in position of the breakpoint on the chromosome sequence. Common repeats (RepeatMasker) and predicted (DupMasker) and annotated duplications are depicted as indicated. The positions of RefSeq exons are shown in red above each chromosome. Additional annotation is located below each clone sequence. These annotations were created specifically for the inserted sequence, not for the clone as a whole. The annotations correspond to conserved segments (green), matching hits from the RefSeq database (red), and regions containing three or more mRNA-seq reads obtained from Wang et al. (blue). Only mRNA-seq reads that do not map against the build36 genome were considered. Conserved segments and RefSeq exon matches were only determined for the portion of the clone that represents the insertion relative to build36.

Clone file = AC158320.fa

Insertion Size: 9105

Other Simple Repeat Low Complexity DNA LTR LINE SINE

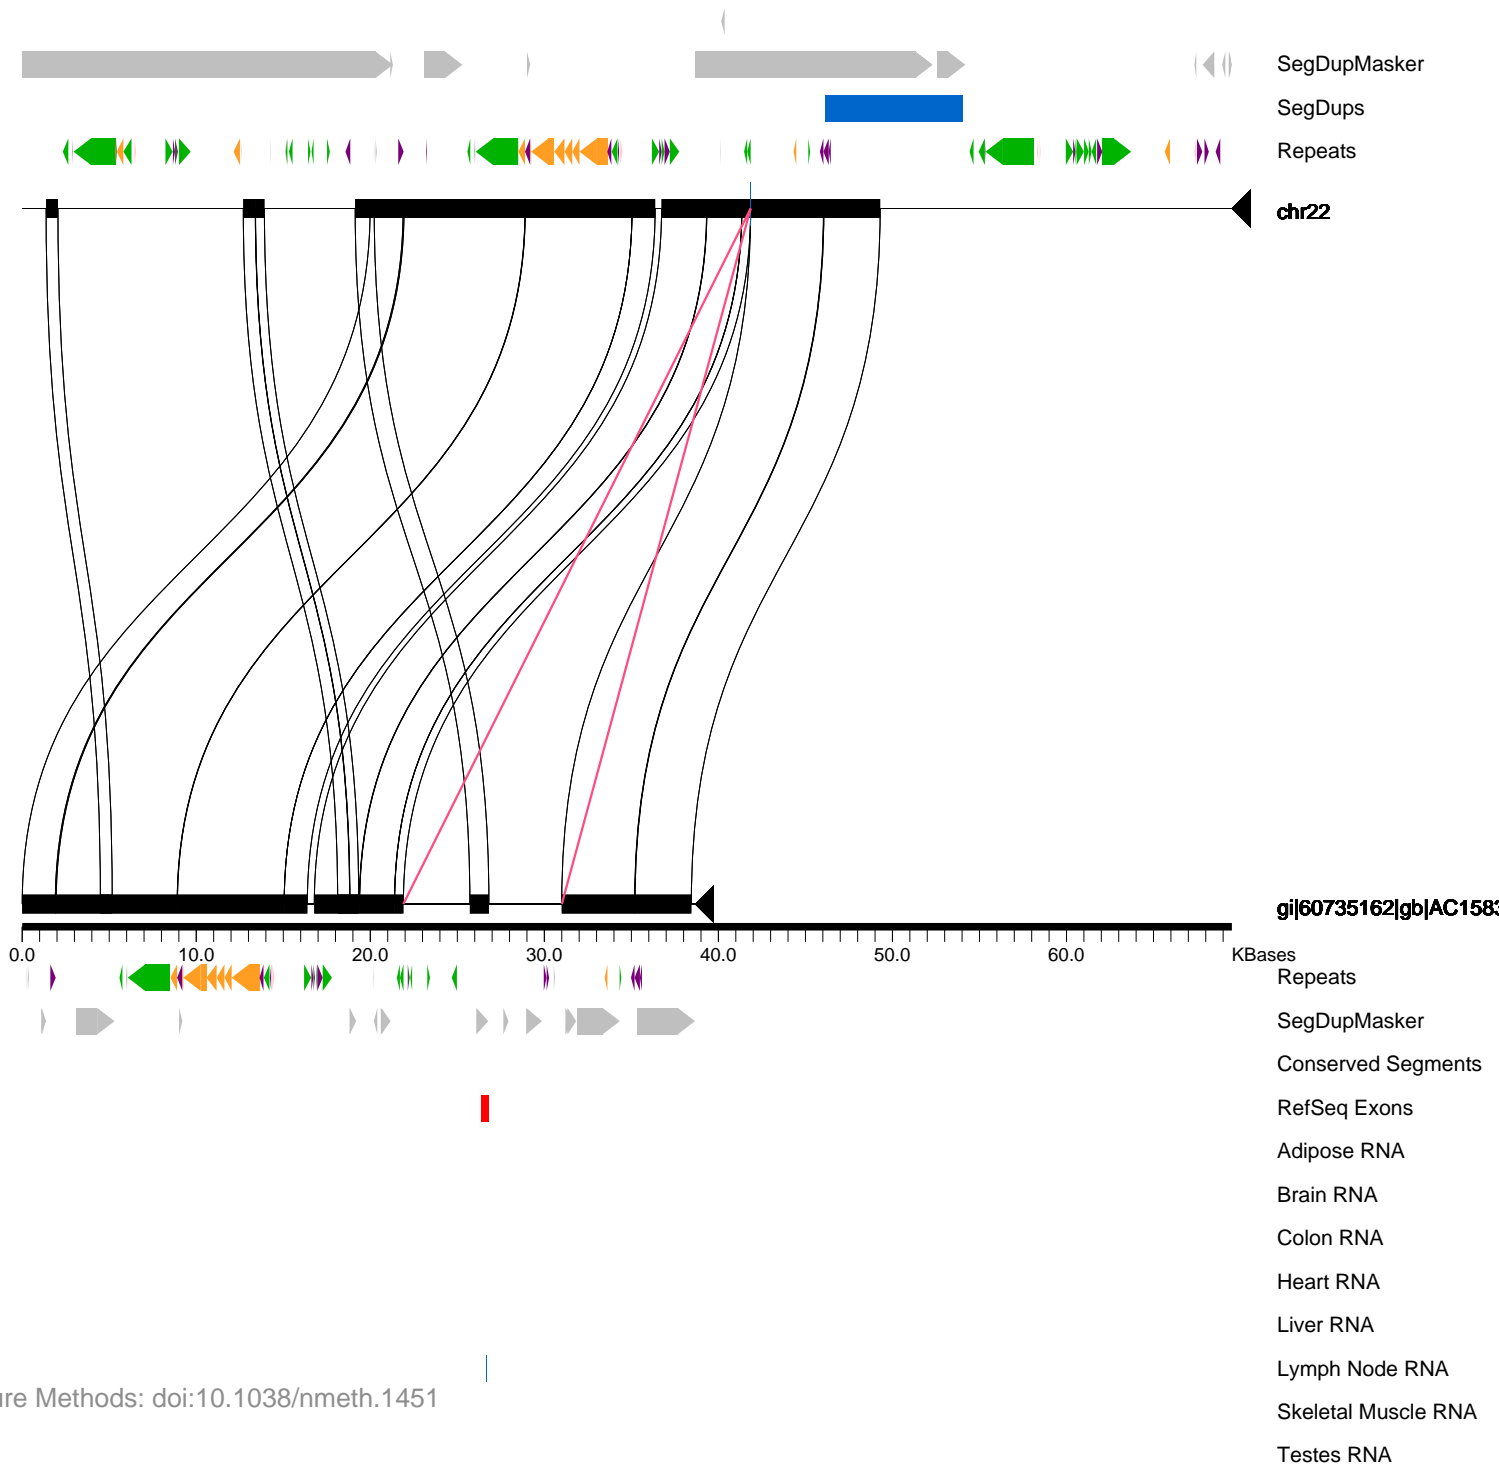

Clone file = AC158324.rc.fa

Insertion Size: 12150

Other Simple Repeat Low Complexity DNA LTR LINE SINE

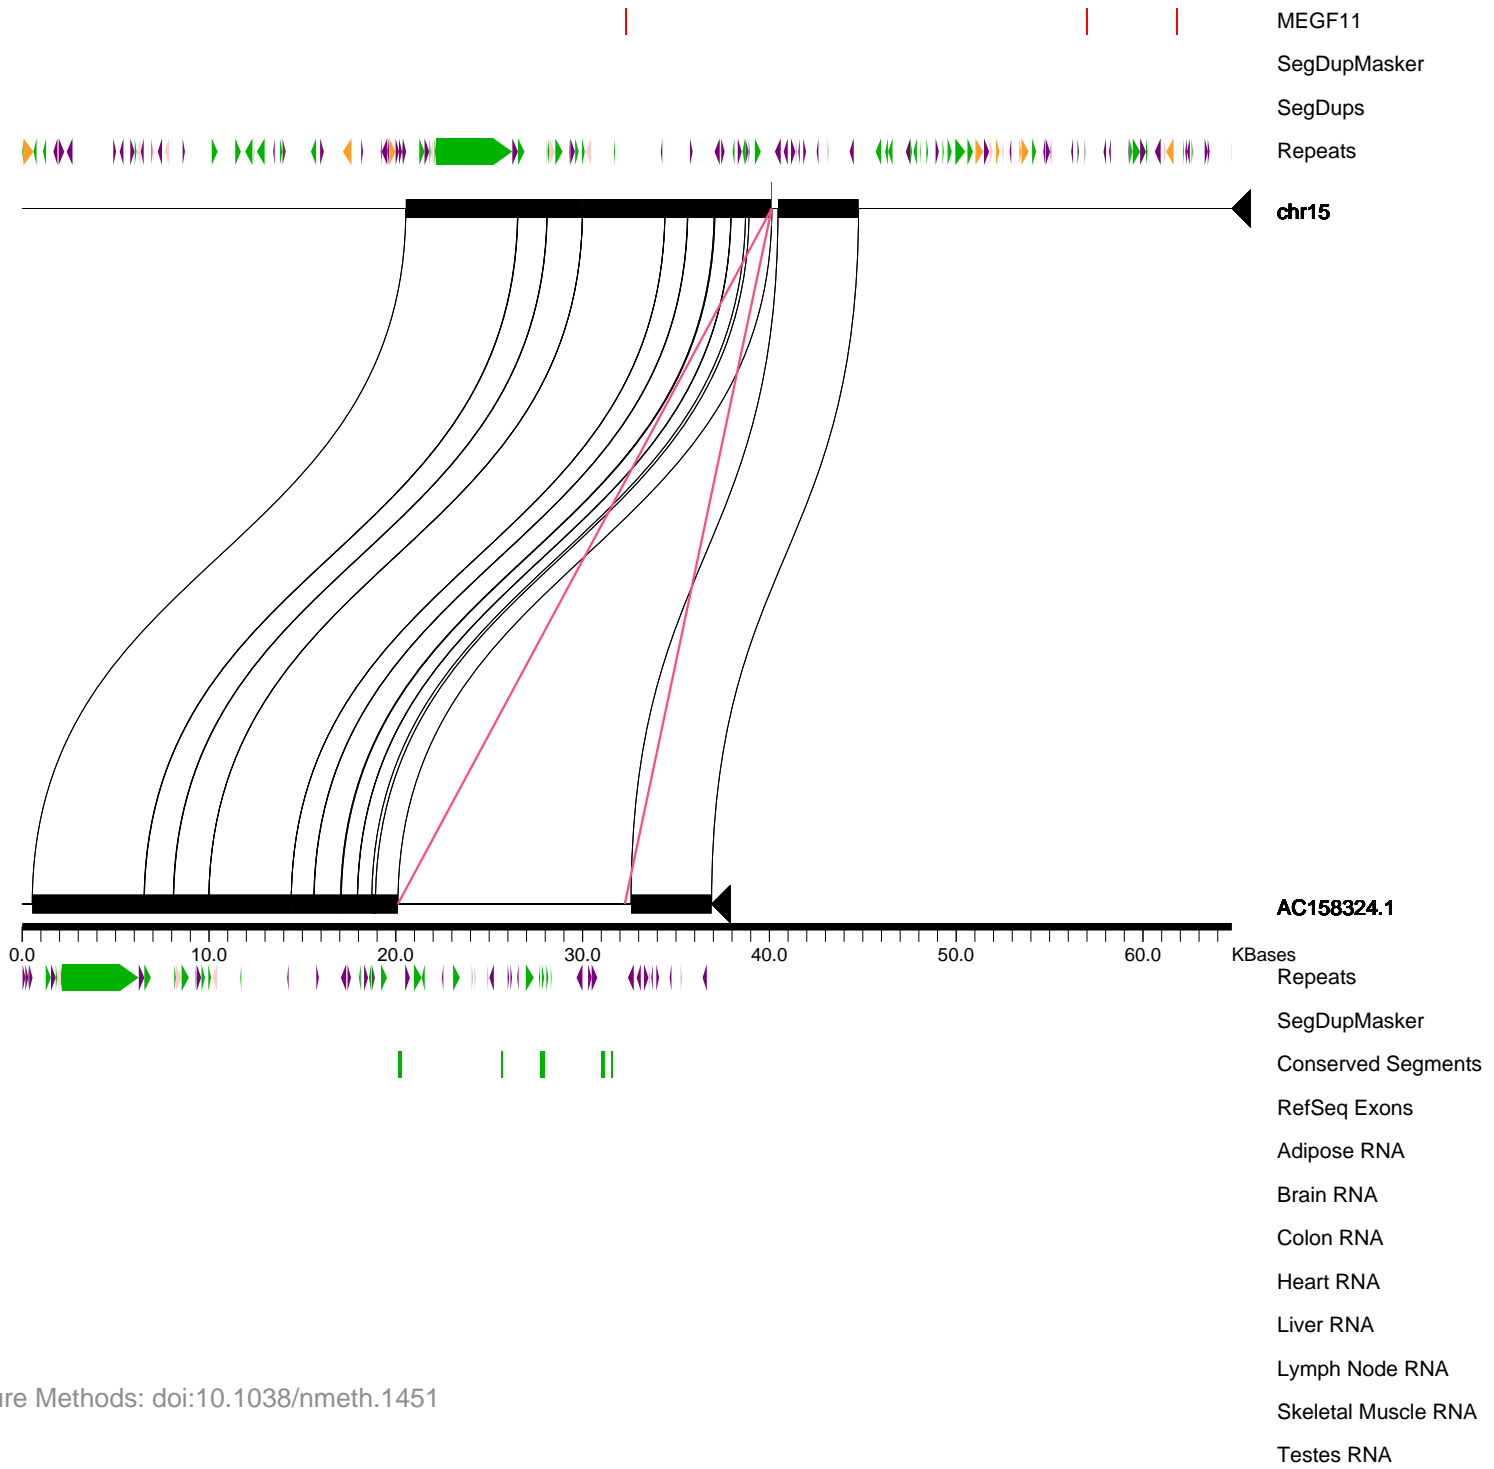

Clone file = AC193150.rc.fa

Insertion Size: 10496

Other Simple Repeat Low Complexity DNA LTR LINE SINE

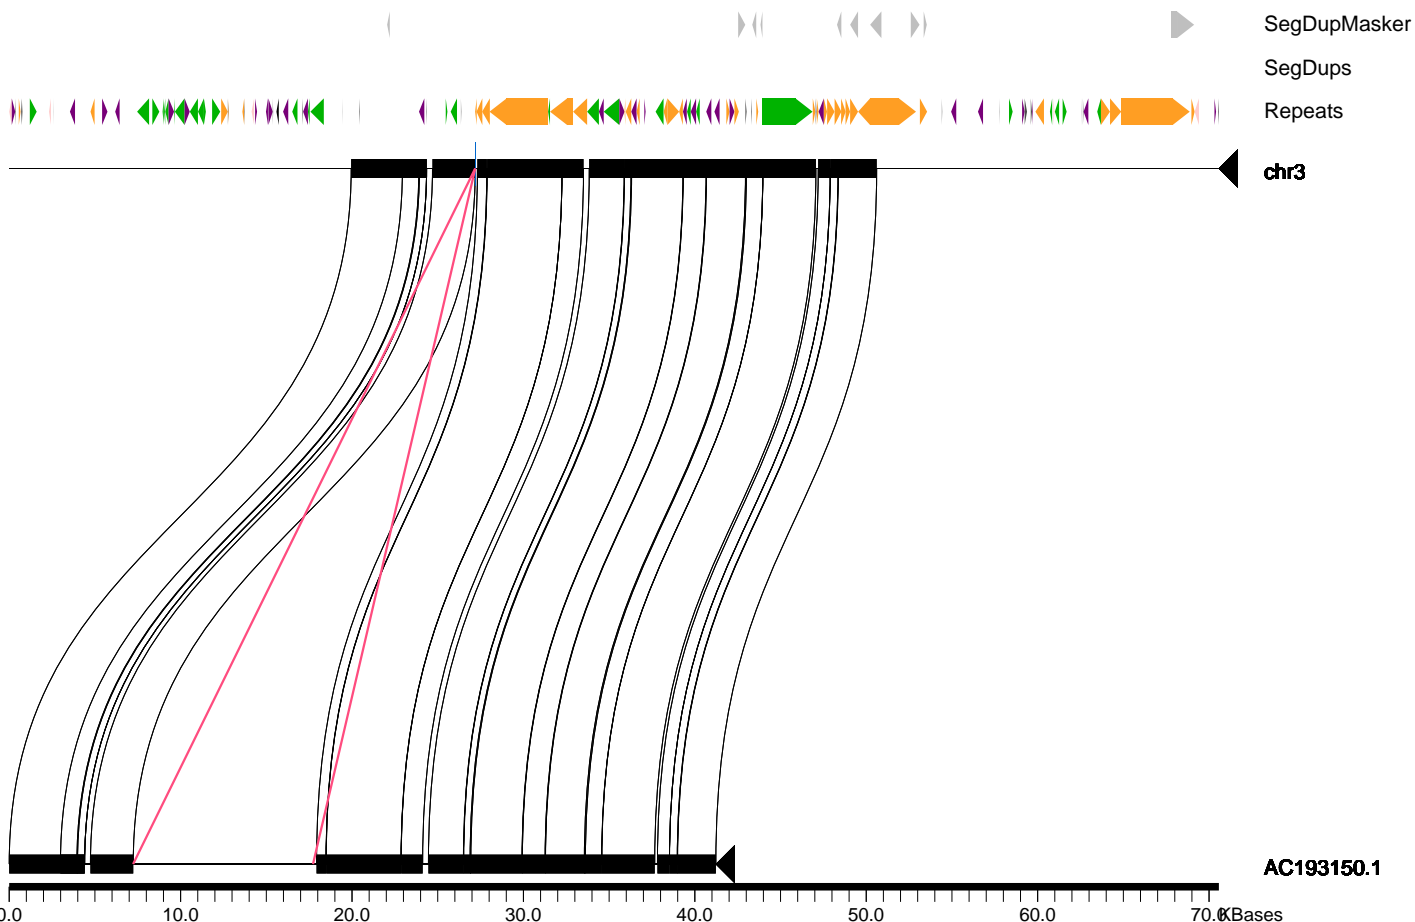

Clone file = AC195745.rc.fa

Insertion Size: 14370

Other Simple Repeat Low Complexity DNA LTR LINE SINE

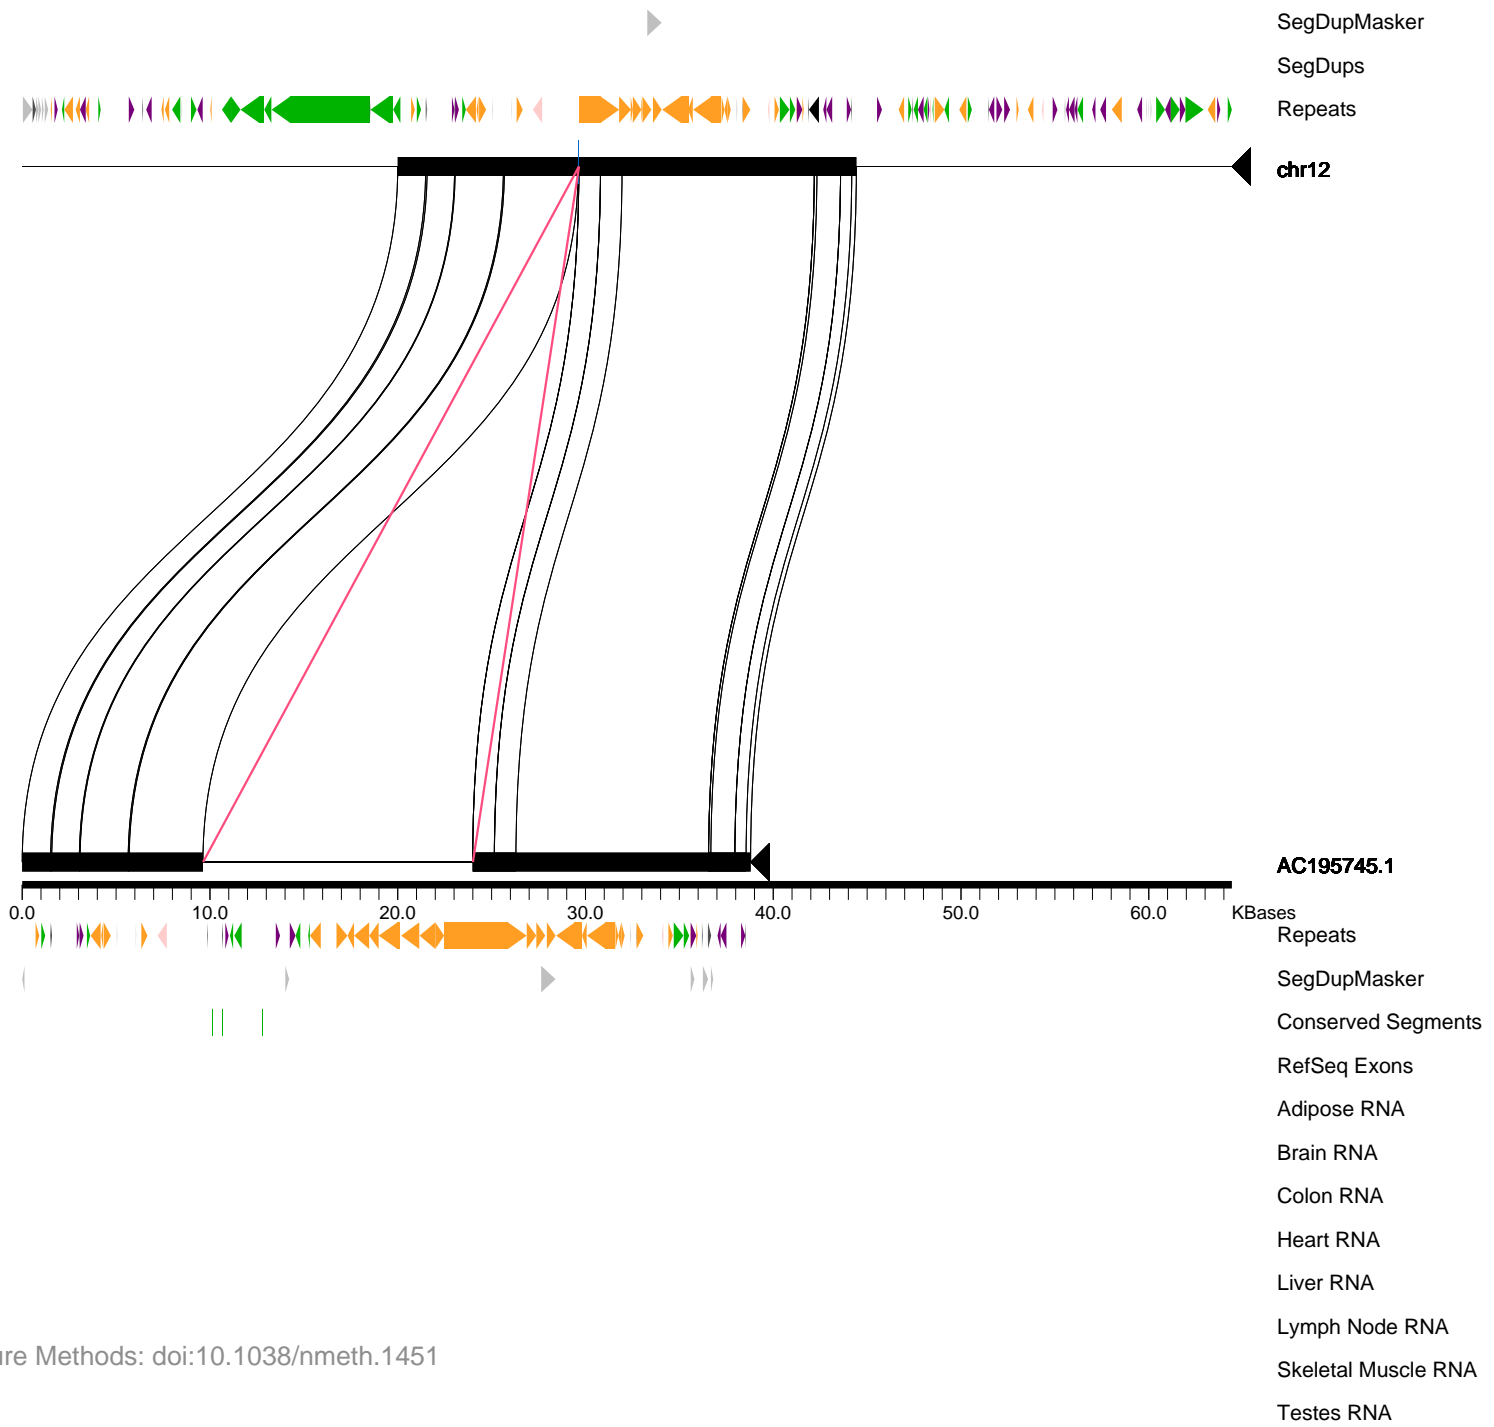

Clone file = AC195766.fa

Insertion Size: 6117

Other Simple Repeat Low Complexity DNA LTR LINE SINE

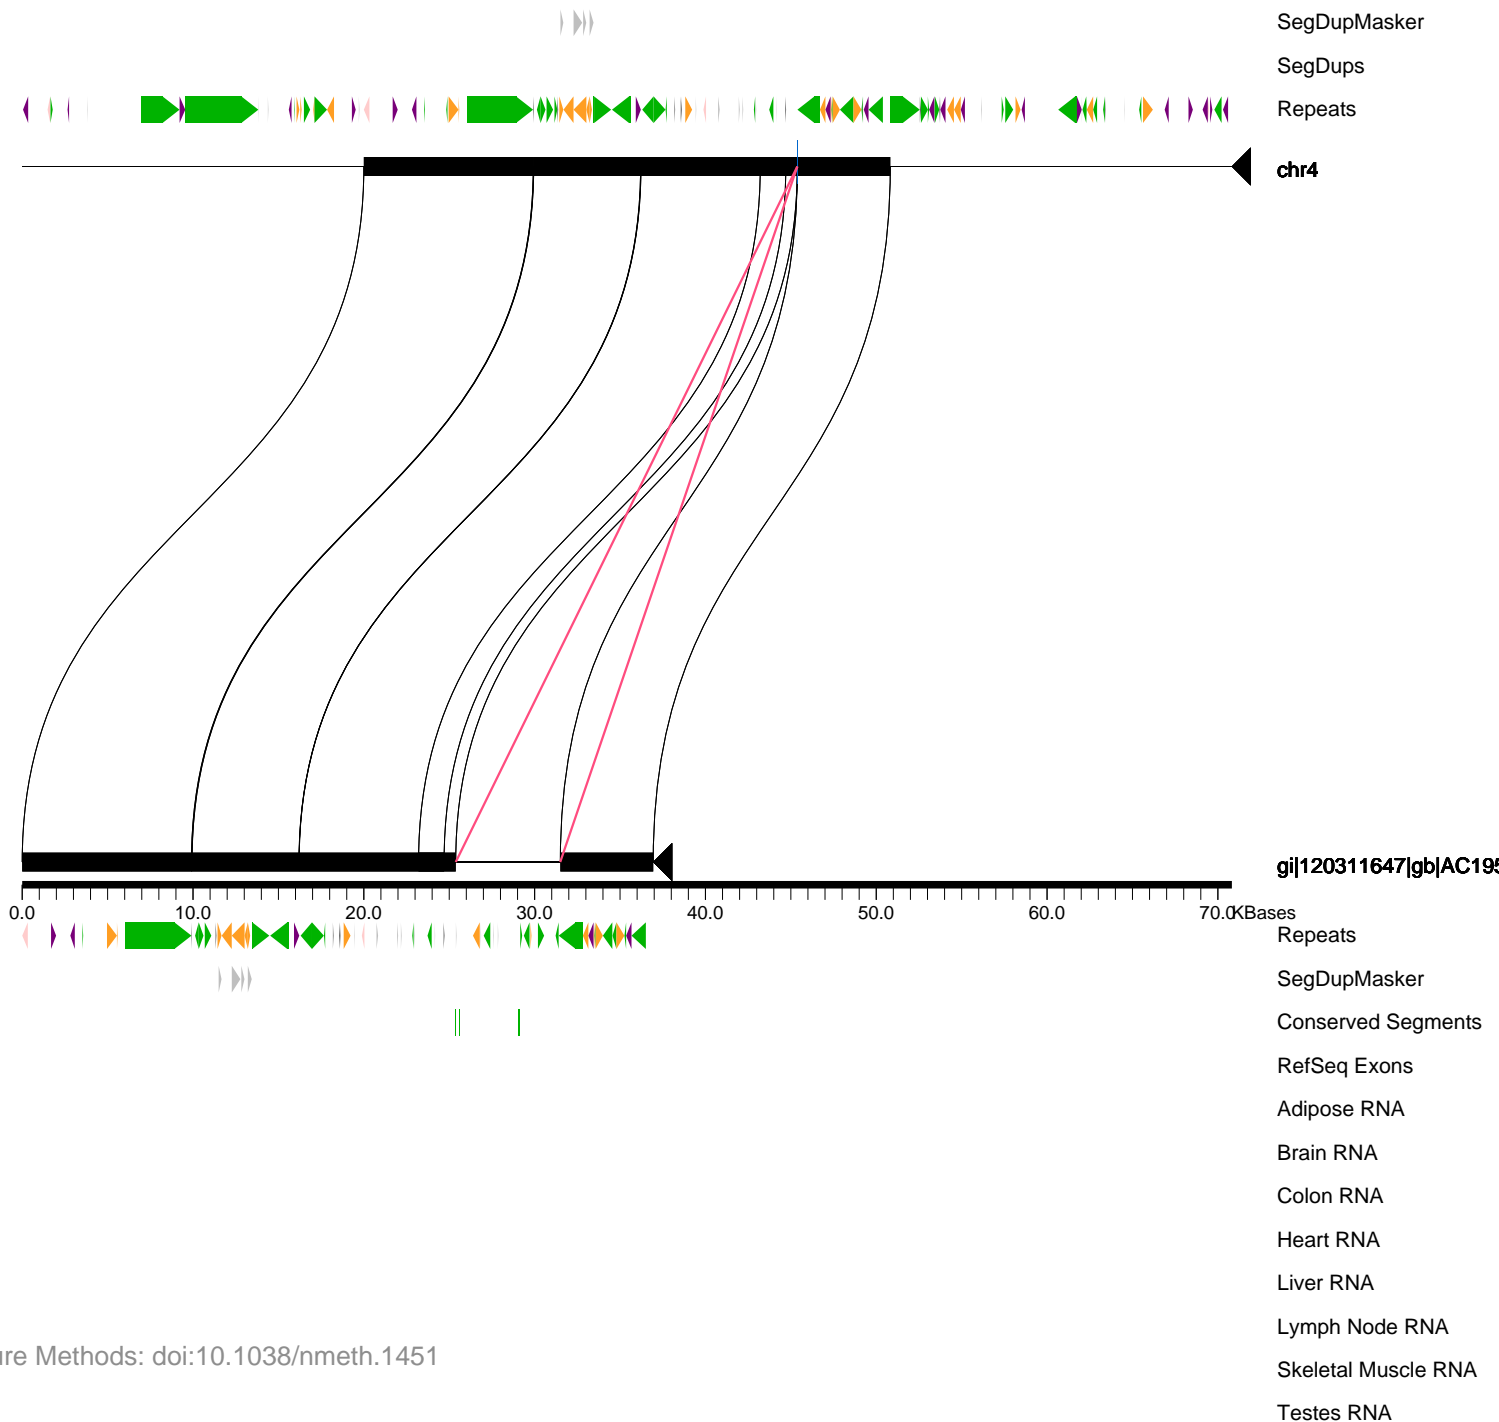

Clone file = AC196513.fa

Insertion Size: 11940

Other Simple Repeat Low Complexity DNA LTR LINE SINE

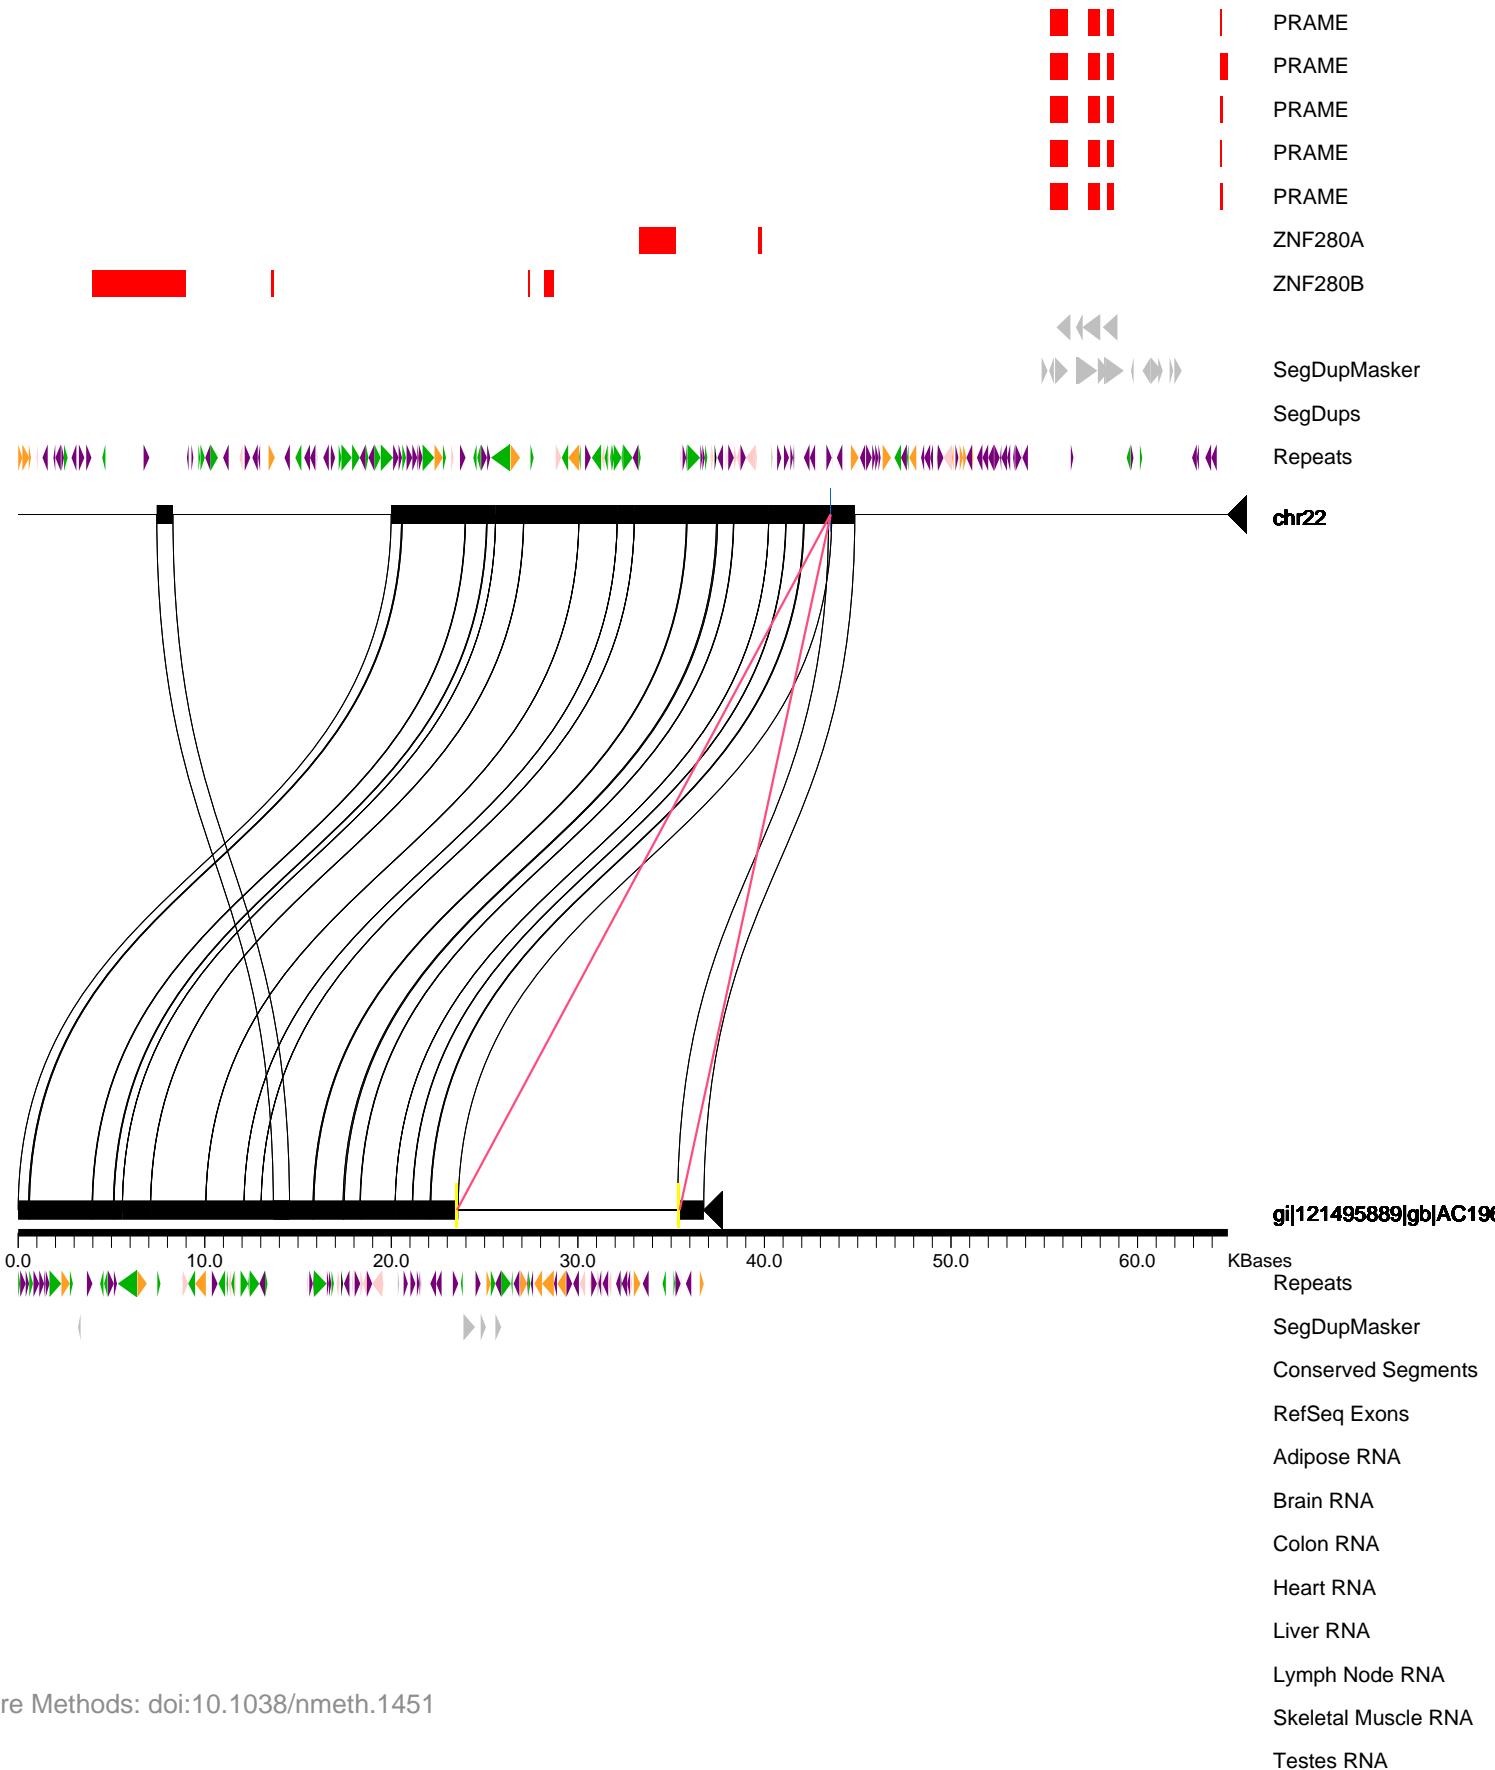



Clone file = AC196515.fa

Insertion Size: 9064

Other Simple Repeat Low Complexity DNA LTR LINE SINE

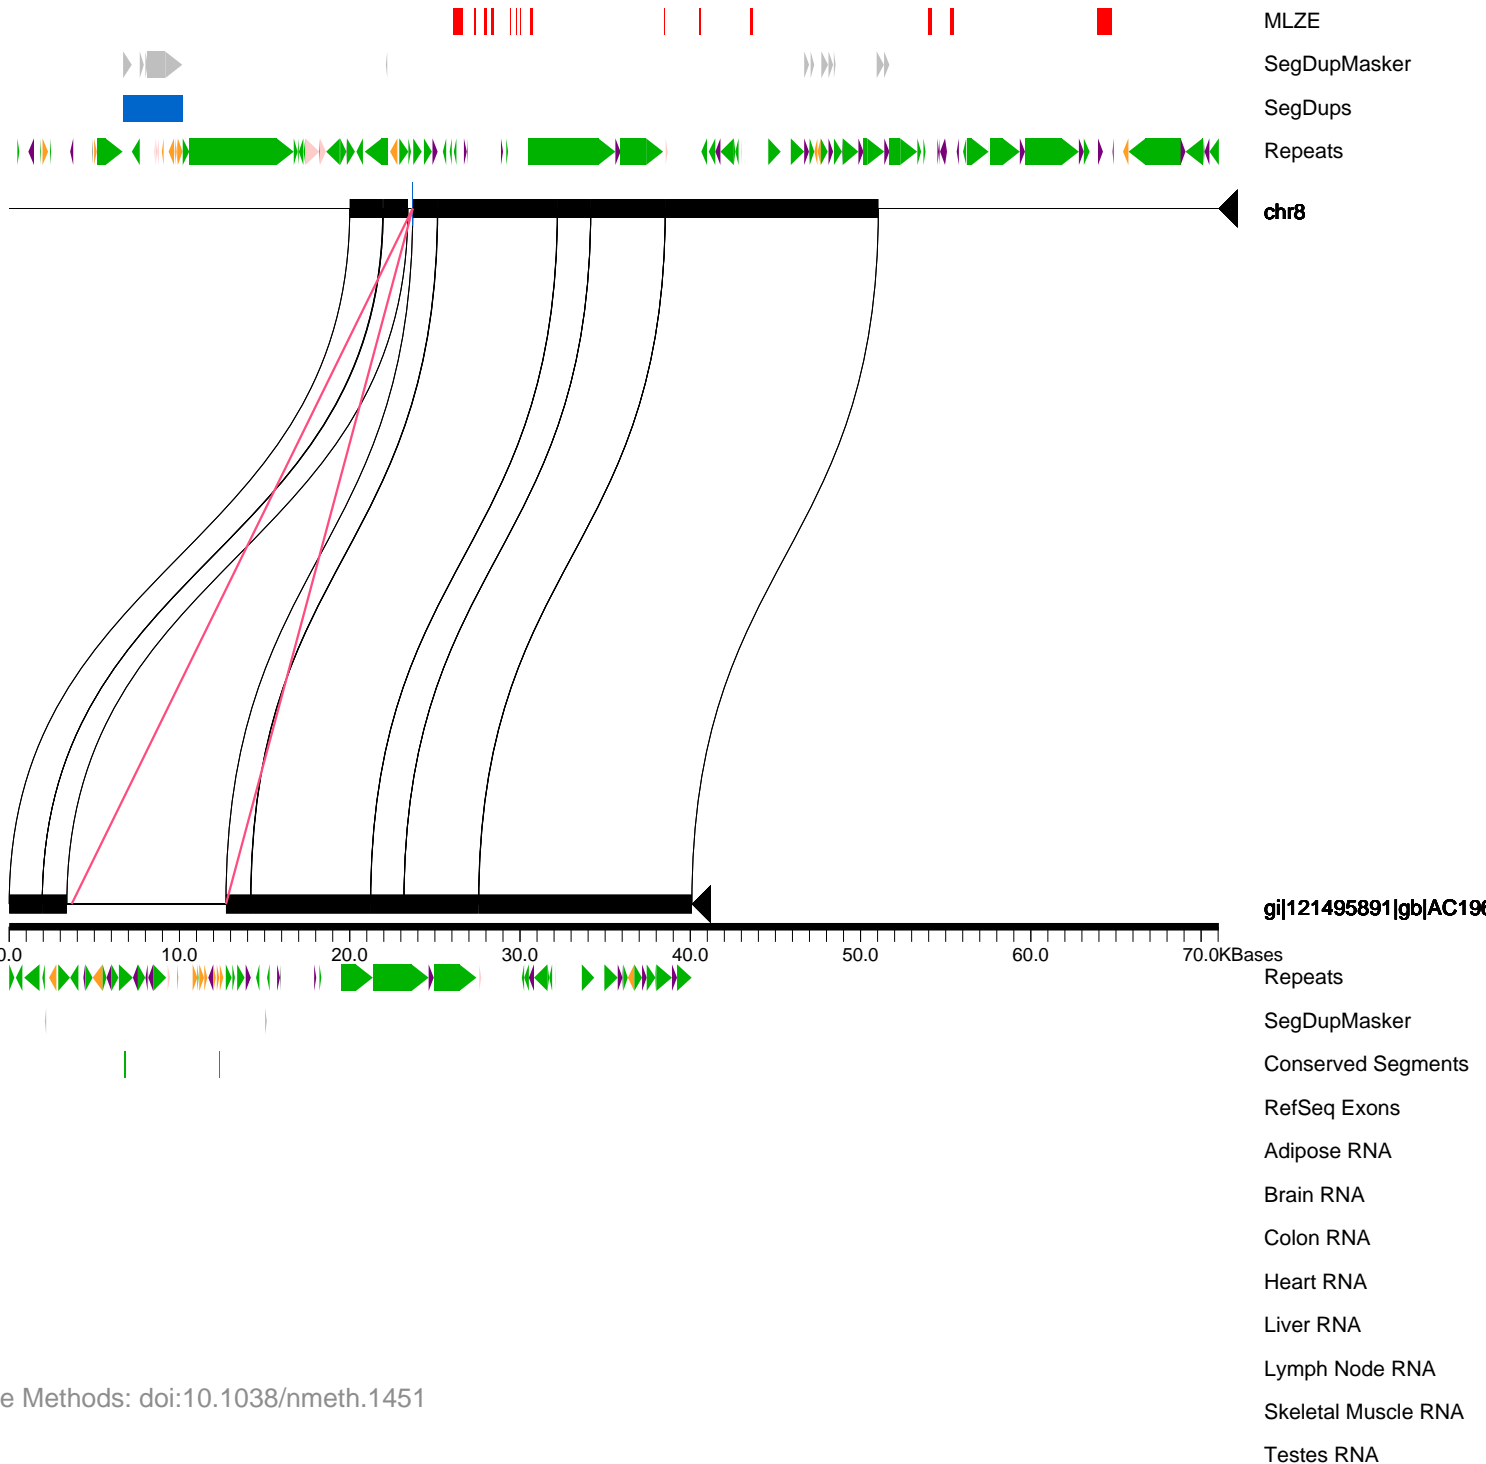

Clone file = AC196541.fa

Insertion Size: 17157

Other Simple Repeat Low Complexity DNA LTR LINE SINE

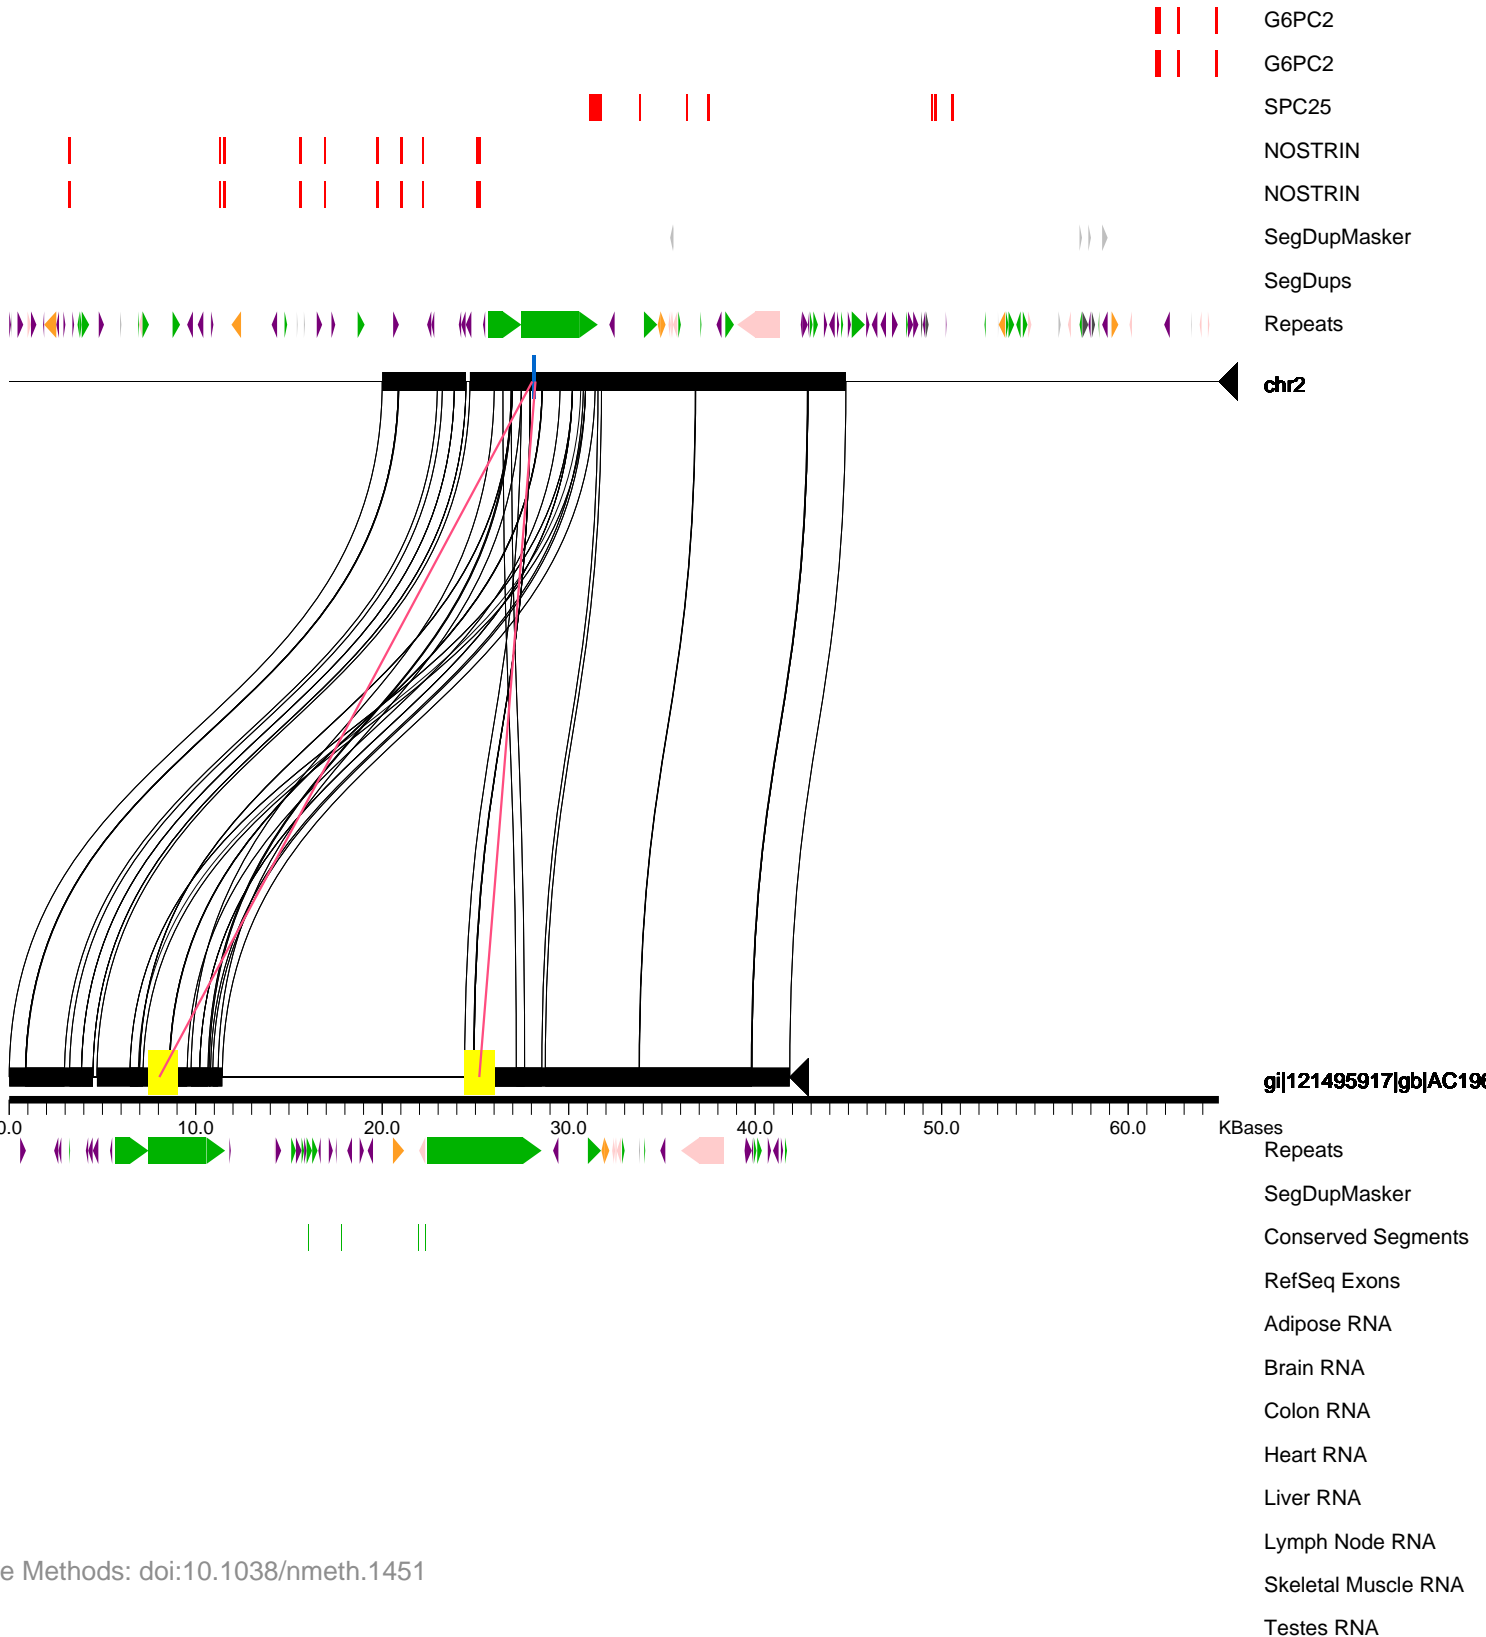

Clone file = AC203605.fa

Insertion Size: 7269

Other Simple Repeat Low Complexity DNA LTR LINE SINE

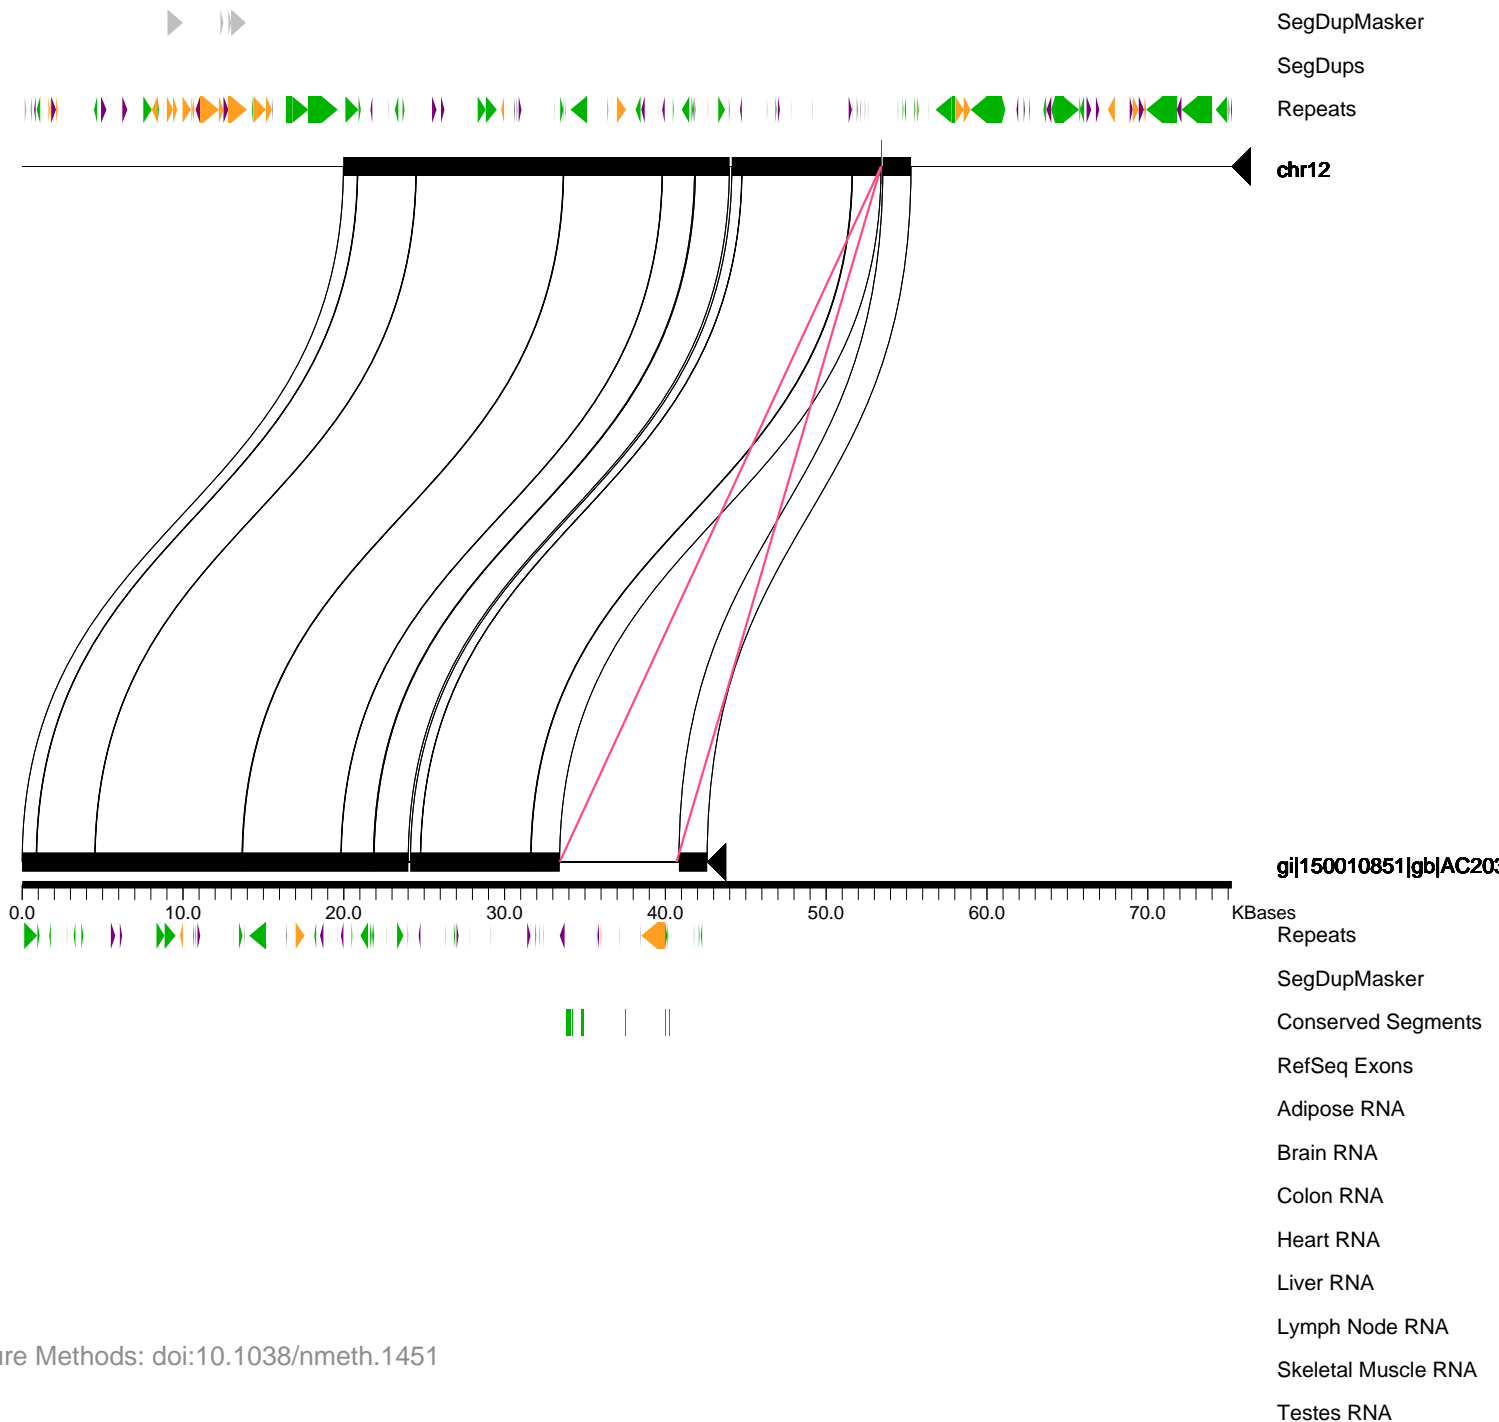

Clone file = AC203606.rc.fa

Insertion Size: 4231

Other Simple Repeat Low Complexity DNA LTR LINE SINE

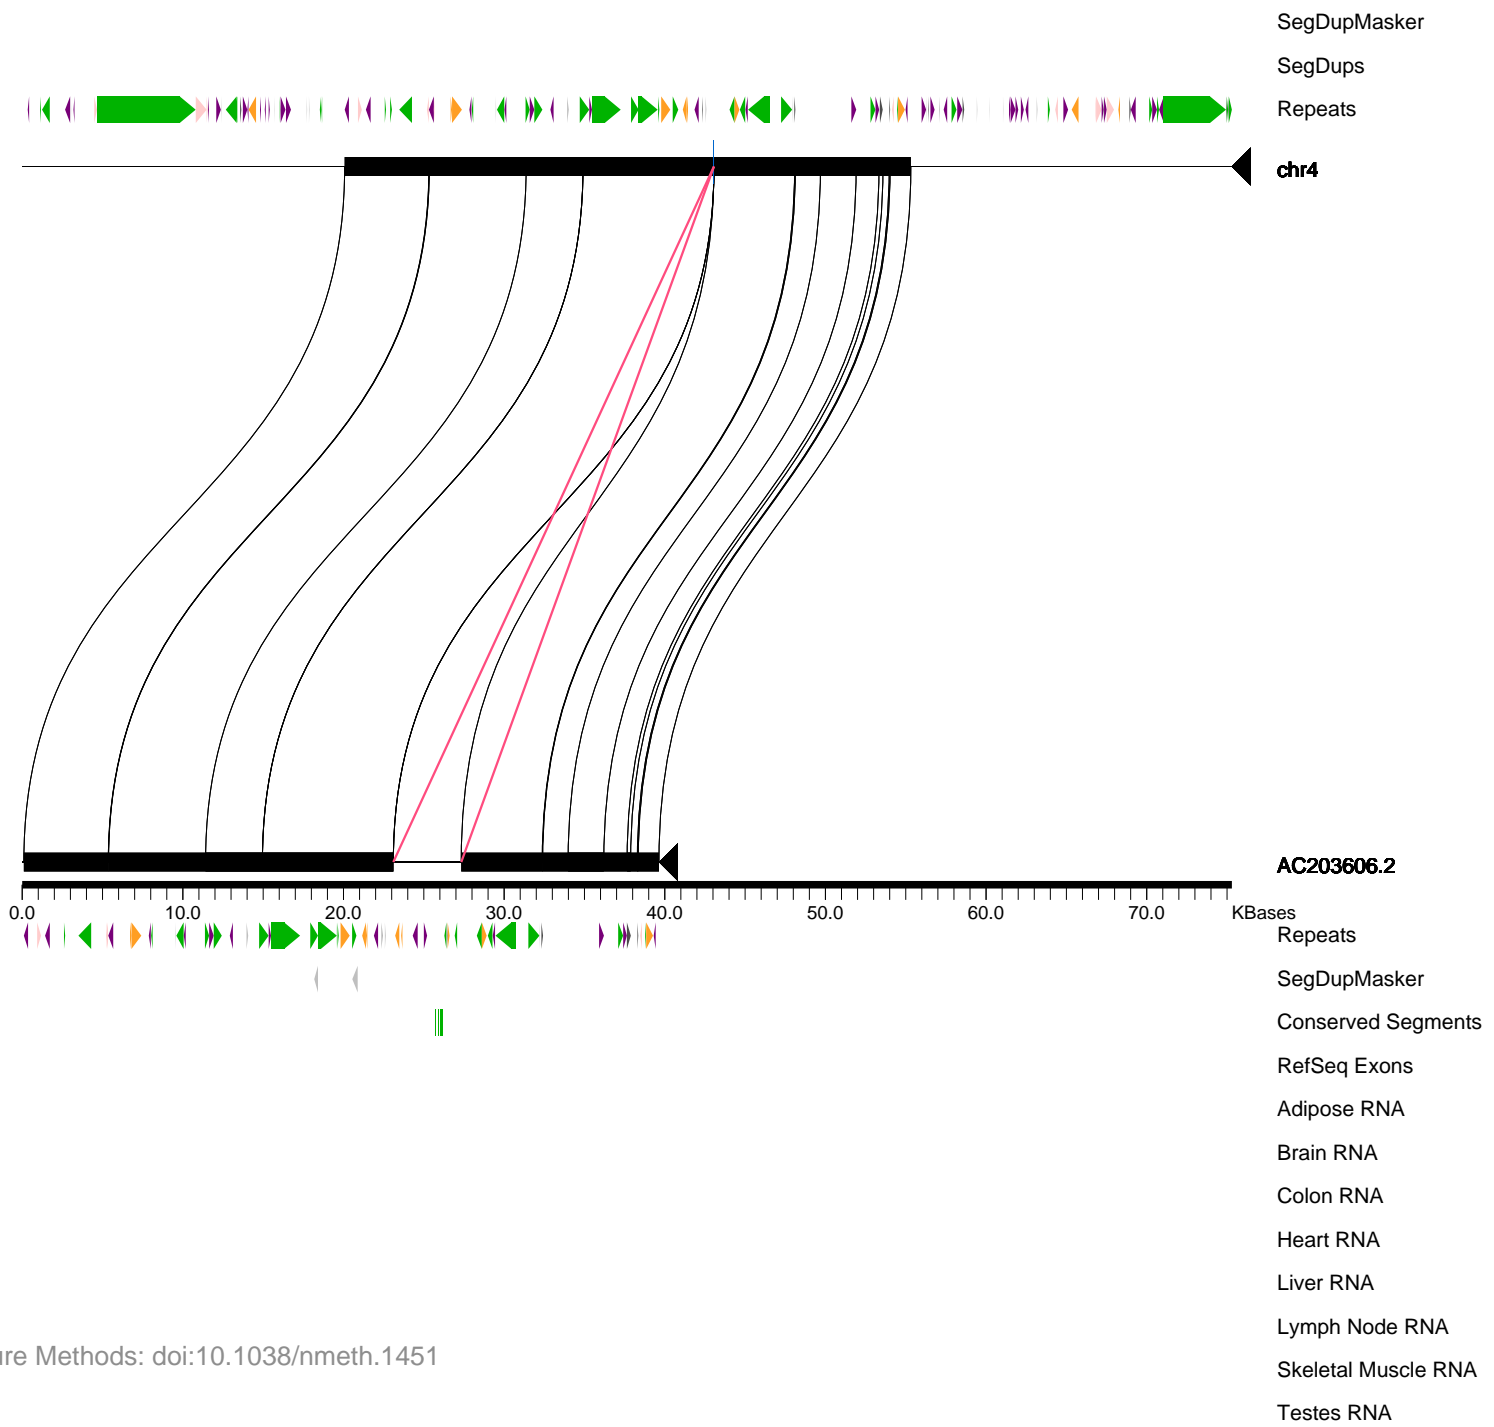

Clone file = AC203610.fa

Insertion Size: 5738

Other Simple Repeat Low Complexity DNA LTR LINE SINE

SegDupMasker

SegDups

Repeats

chr11

gi|150010853|gb|AC203

KBases

Repeats

SegDupMasker

Conserved Segments

RefSeq Exons

Adipose RNA

Brain RNA

Colon RNA

Heart RNA

Liver RNA

Lymph Node RNA

Skeletal Muscle RNA

Testes RNA

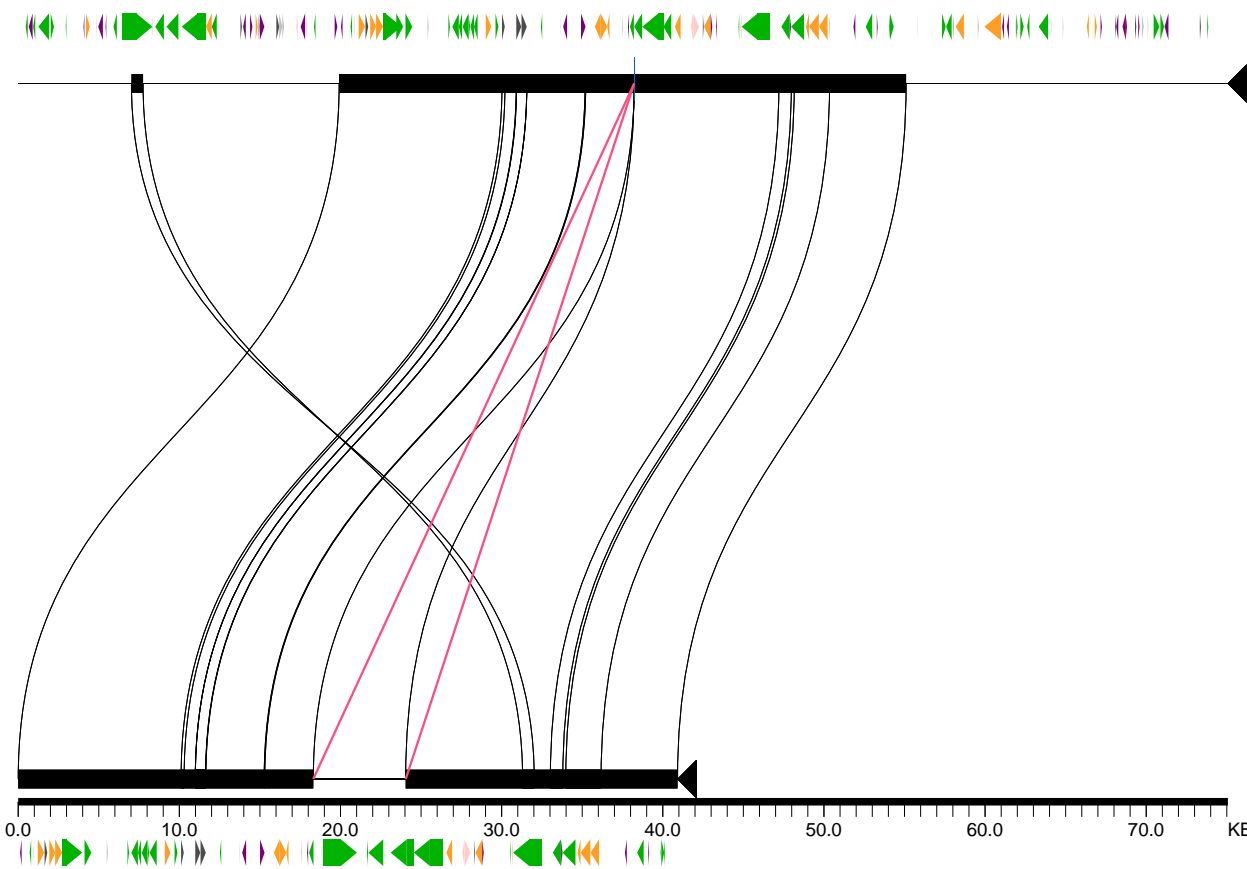

Clone file = AC203617.rc.fa

Insertion Size: 4087

Other Simple Repeat Low Complexity DNA LTR LINE SINE

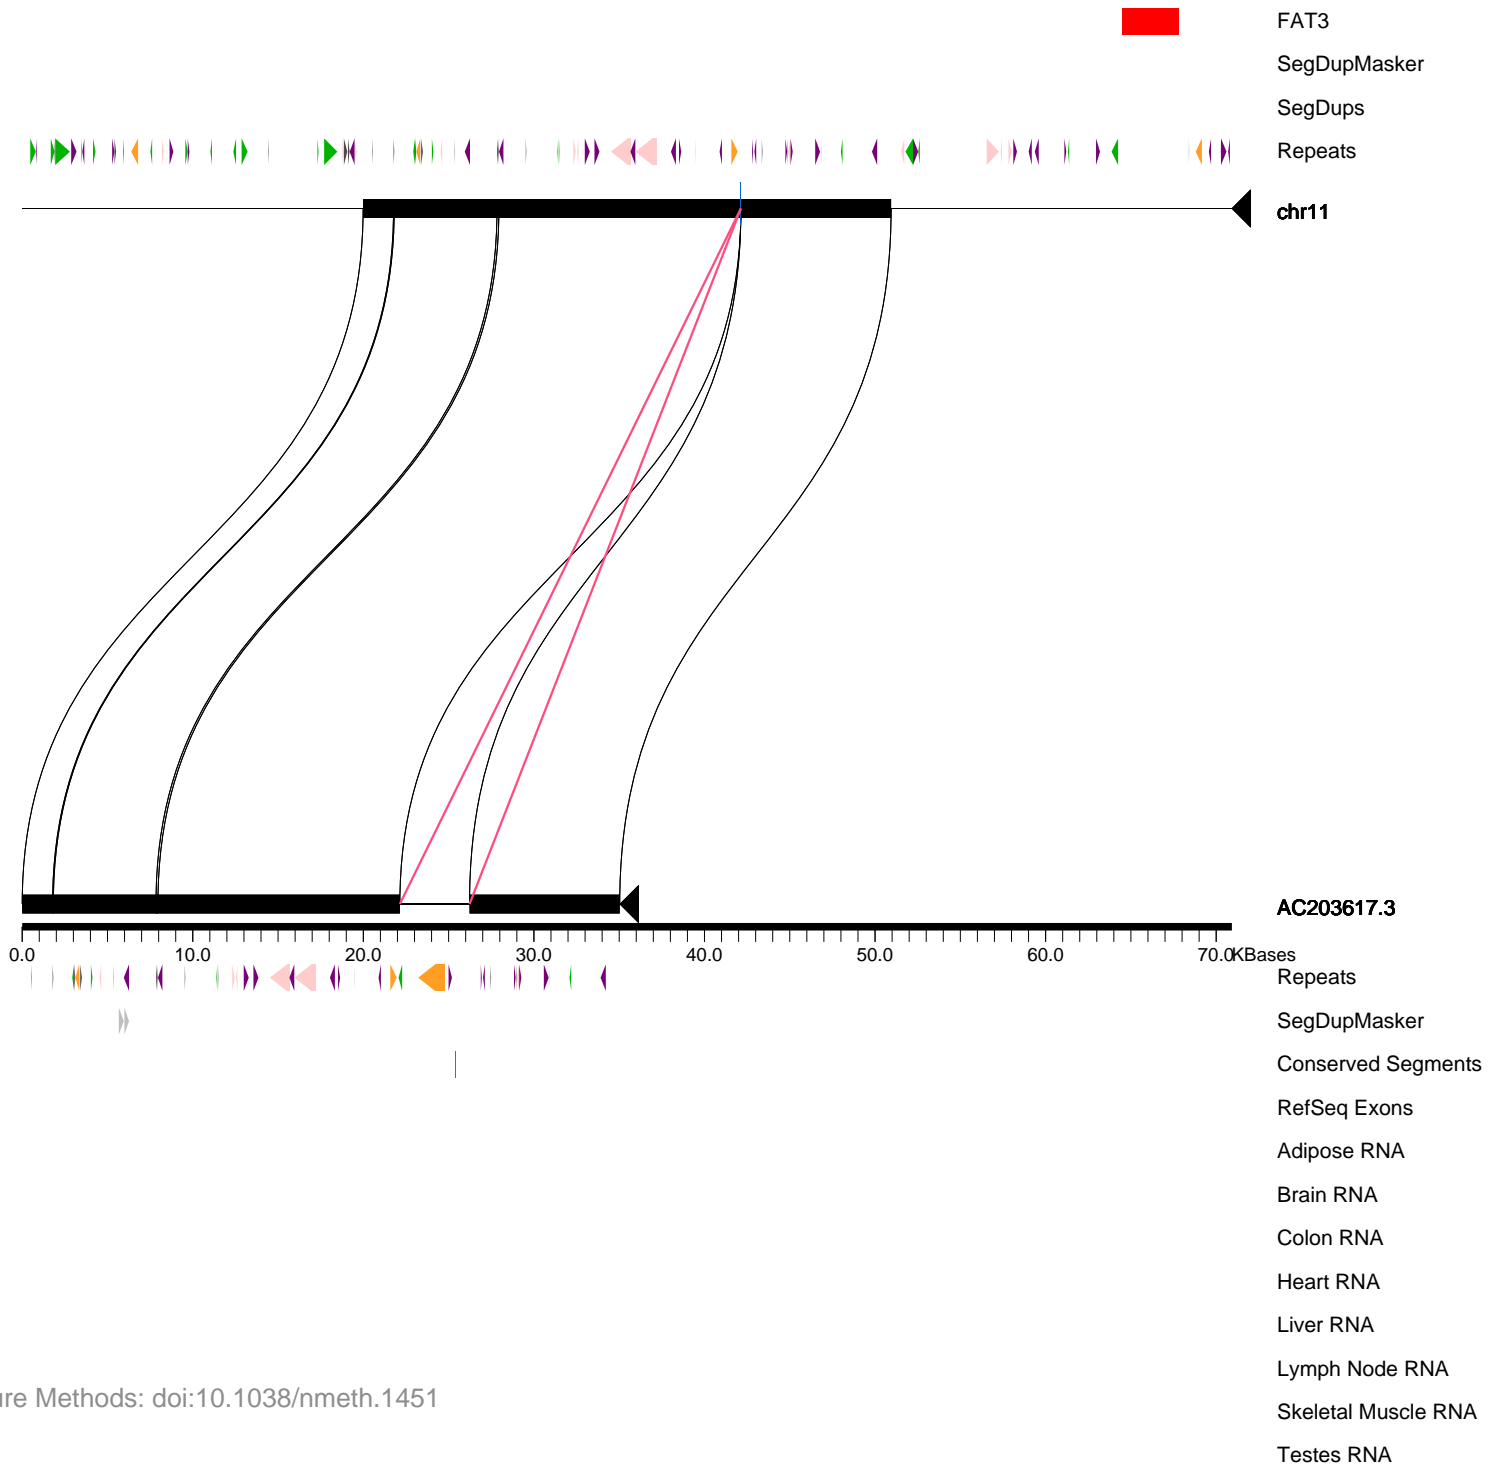

Clone file = AC203630.rc.fa

Insertion Size: 4385

Other Simple Repeat Low Complexity DNA LTR LINE SINE

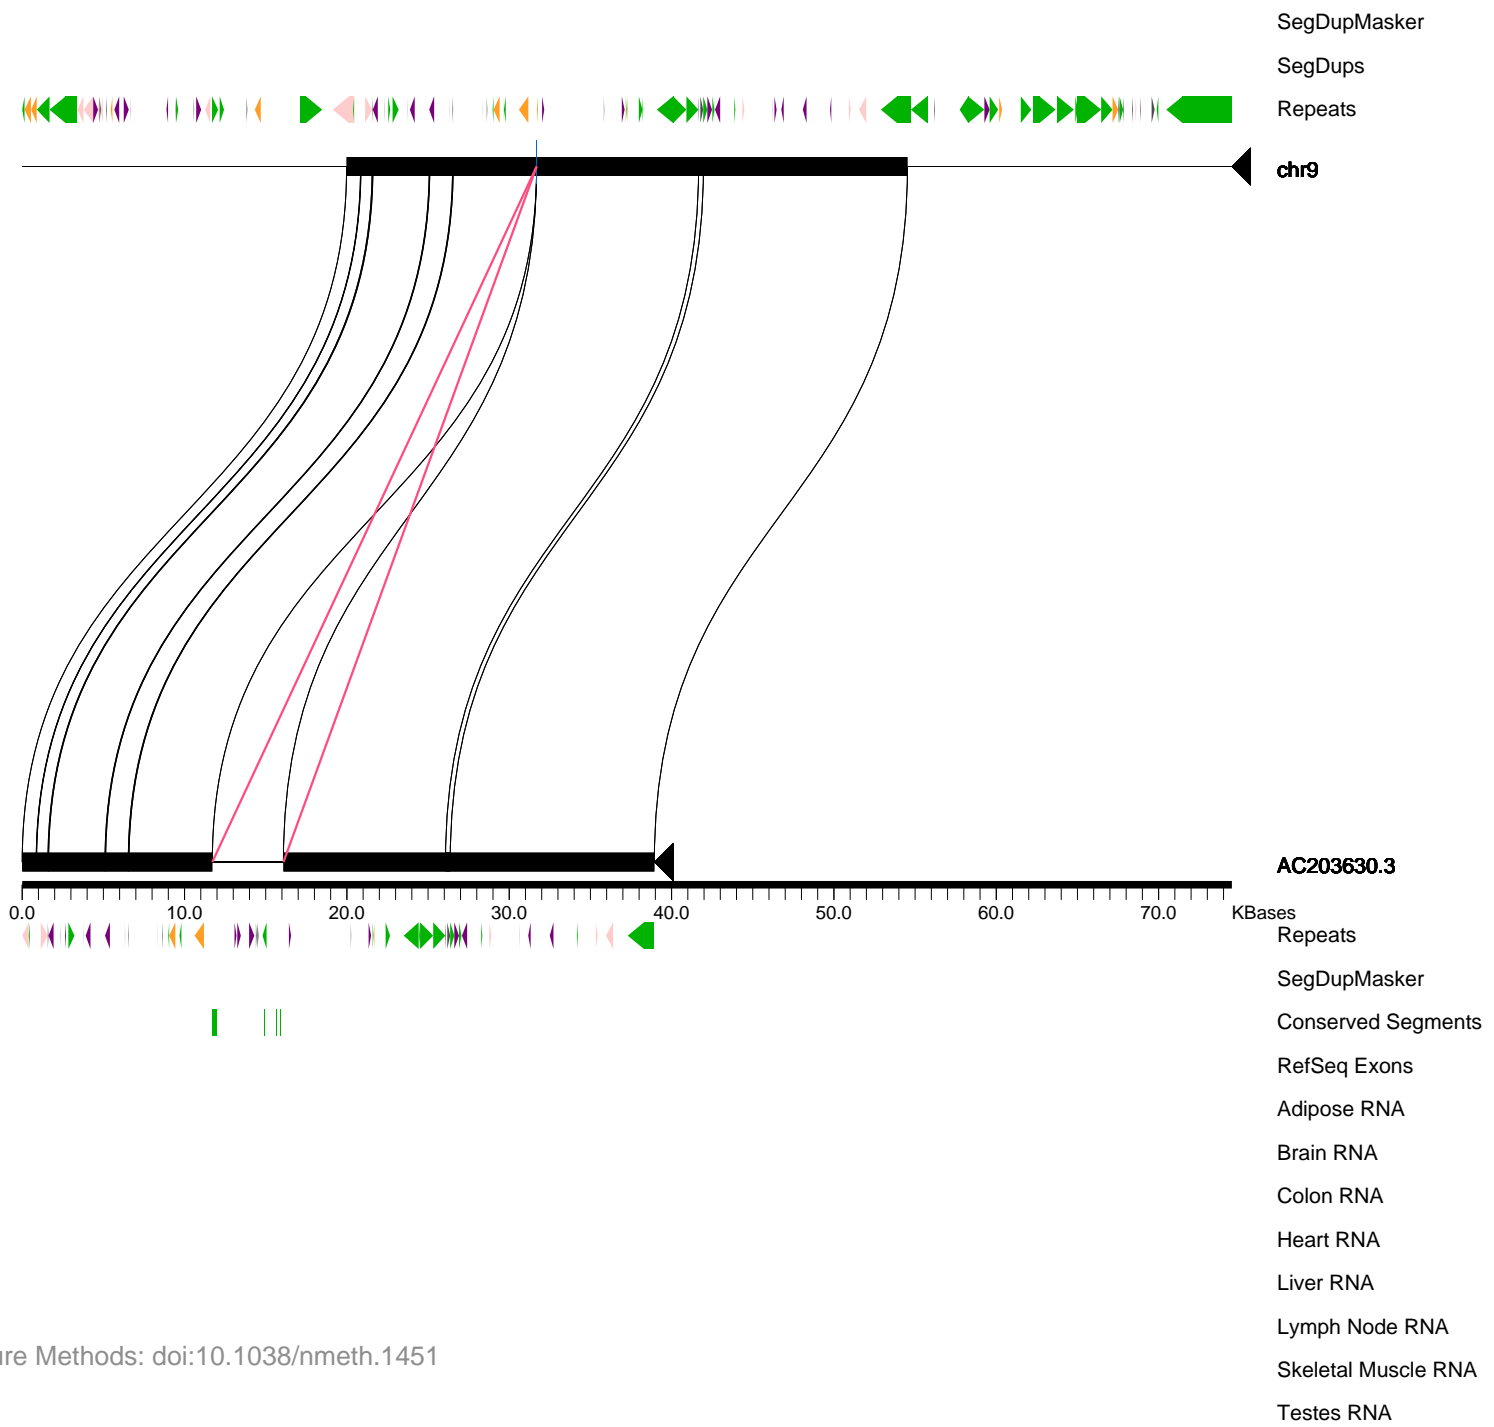

Clone file = AC203636.rc.fa

Insertion Size: 2500

Other Simple Repeat Low Complexity DNA LTR LINE SINE

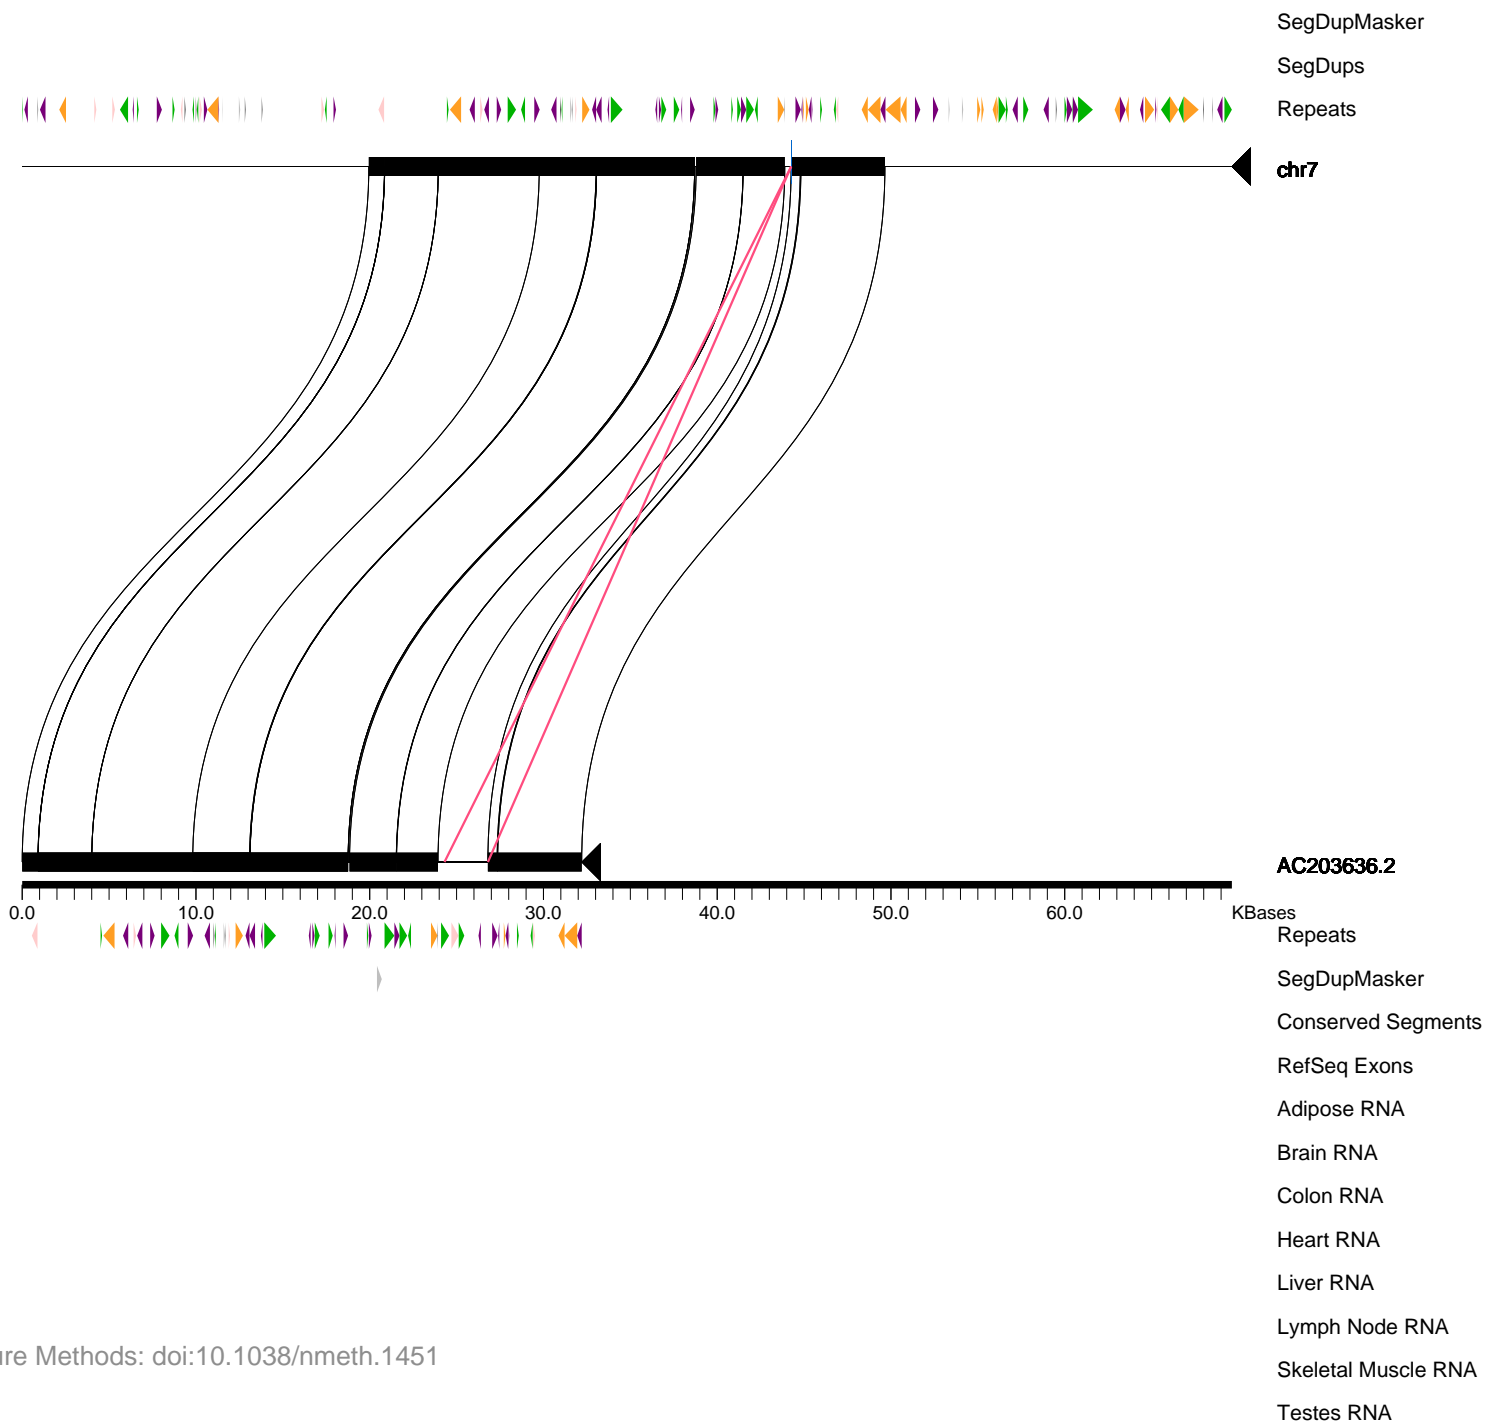



Clone file = AC203638.fa

Insertion Size: 7822

Other Simple Repeat Low Complexity DNA LTR LINE SINE

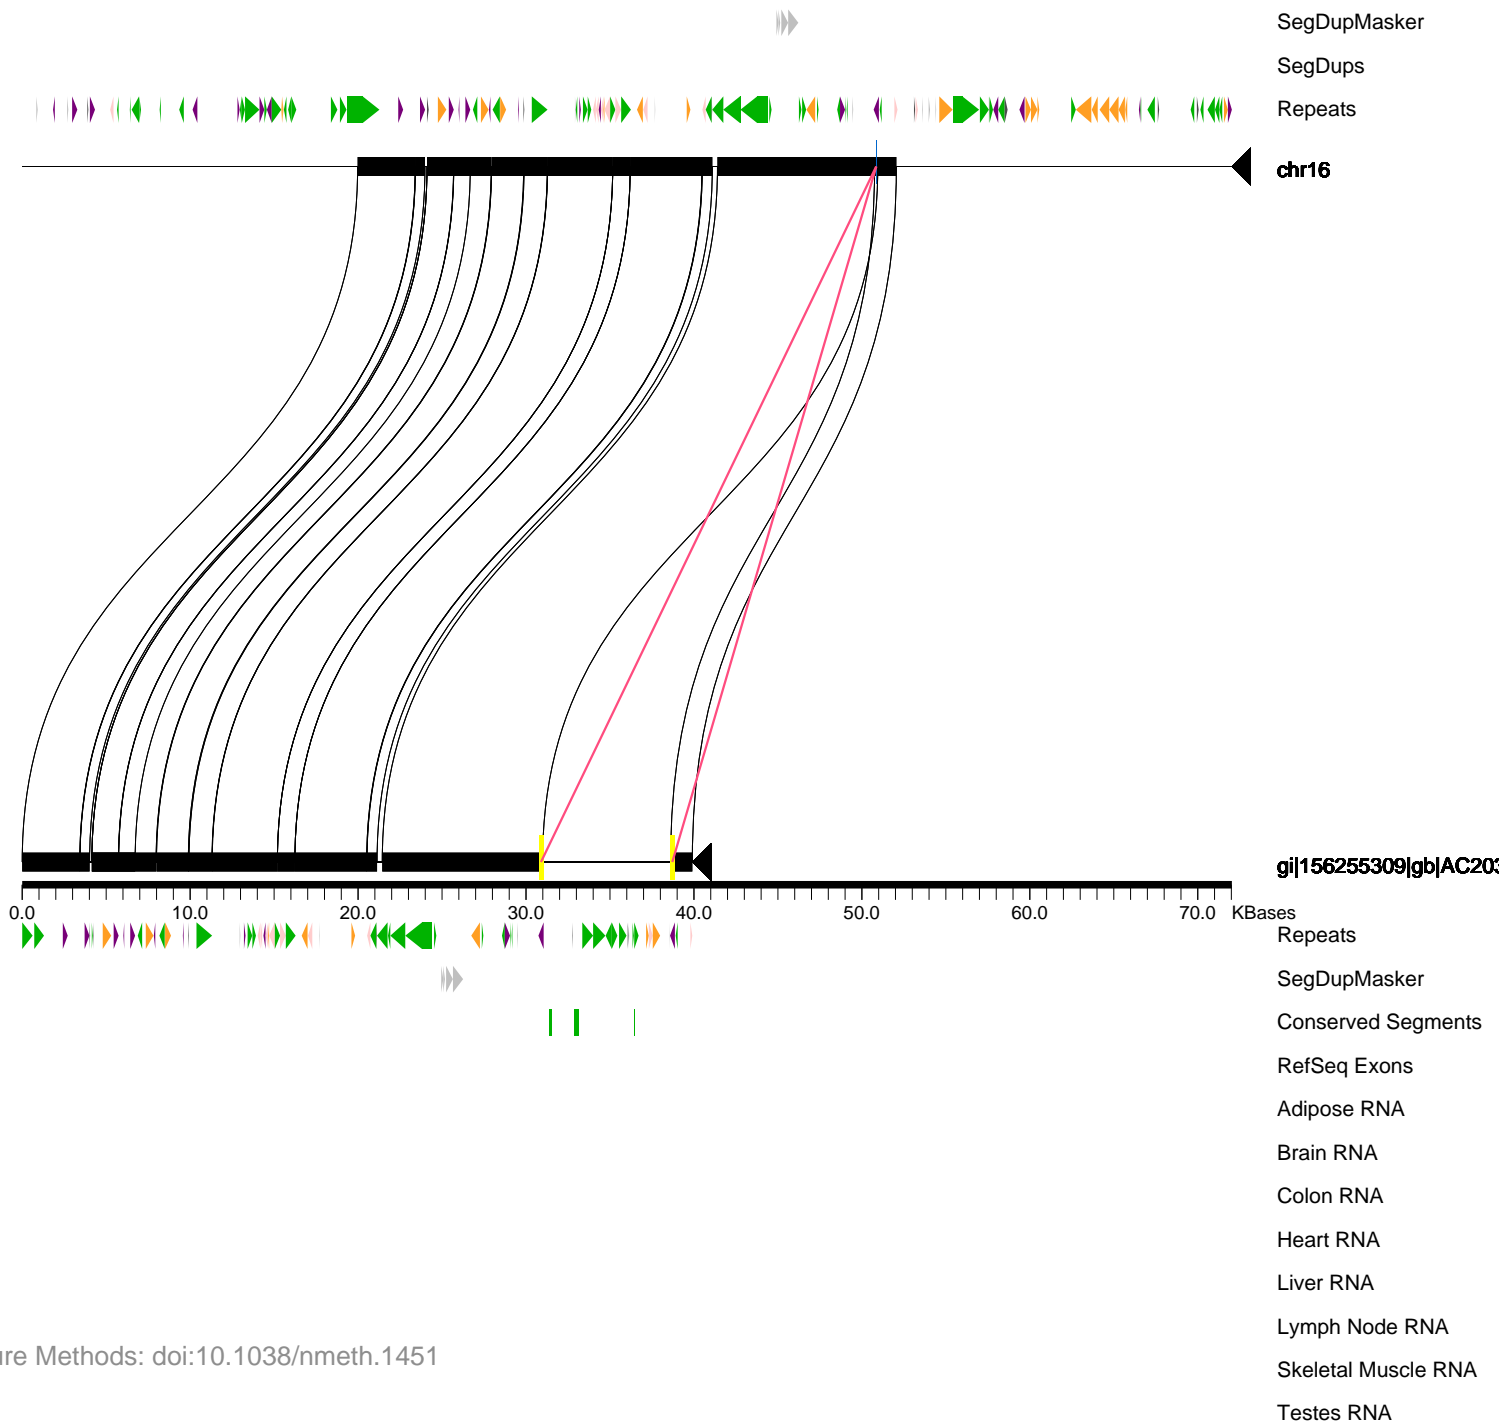

Clone file = AC203640.fa

Insertion Size: 5817

Other Simple Repeat Low Complexity DNA LTR LINE SINE

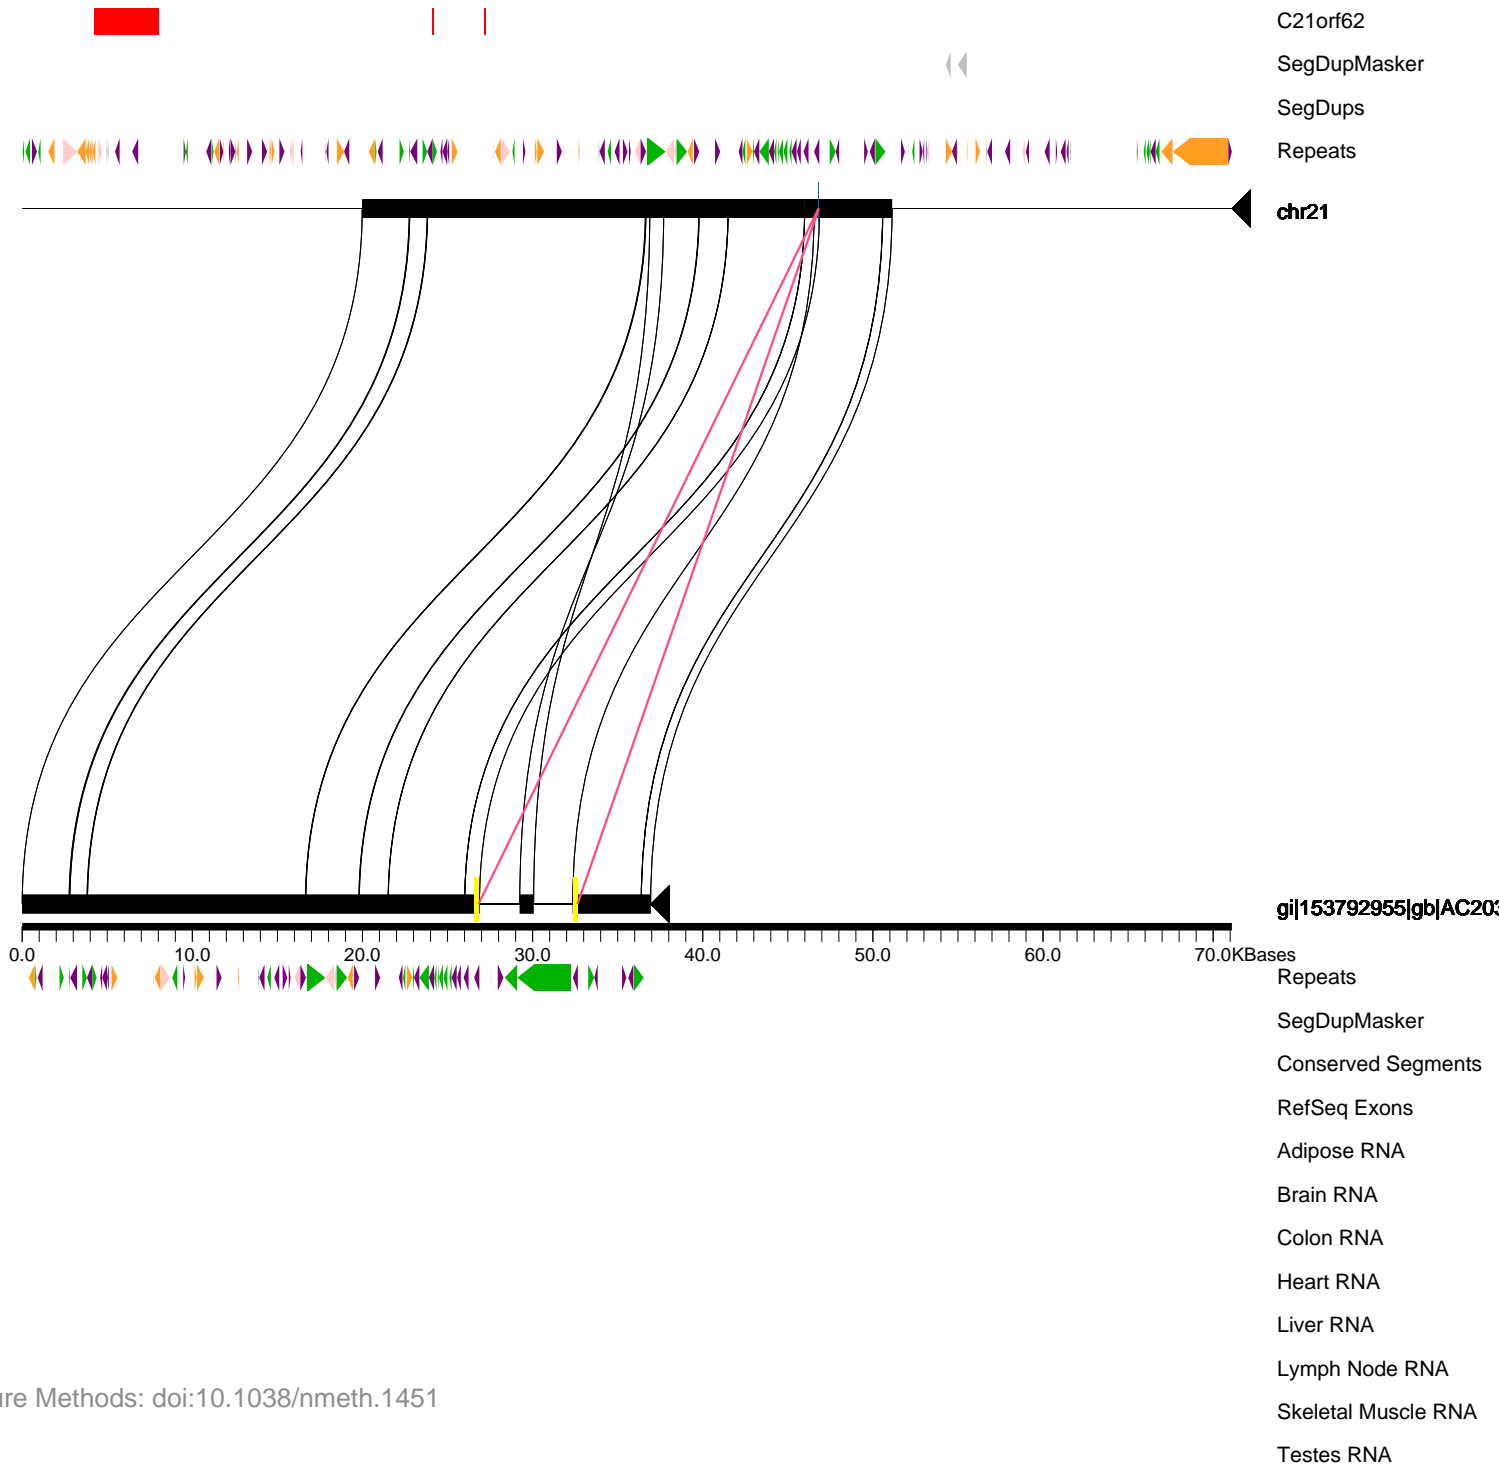

Clone file = AC203644.rc.fa

Insertion Size: 3946

Other Simple Repeat Low Complexity DNA LTR LINE SINE

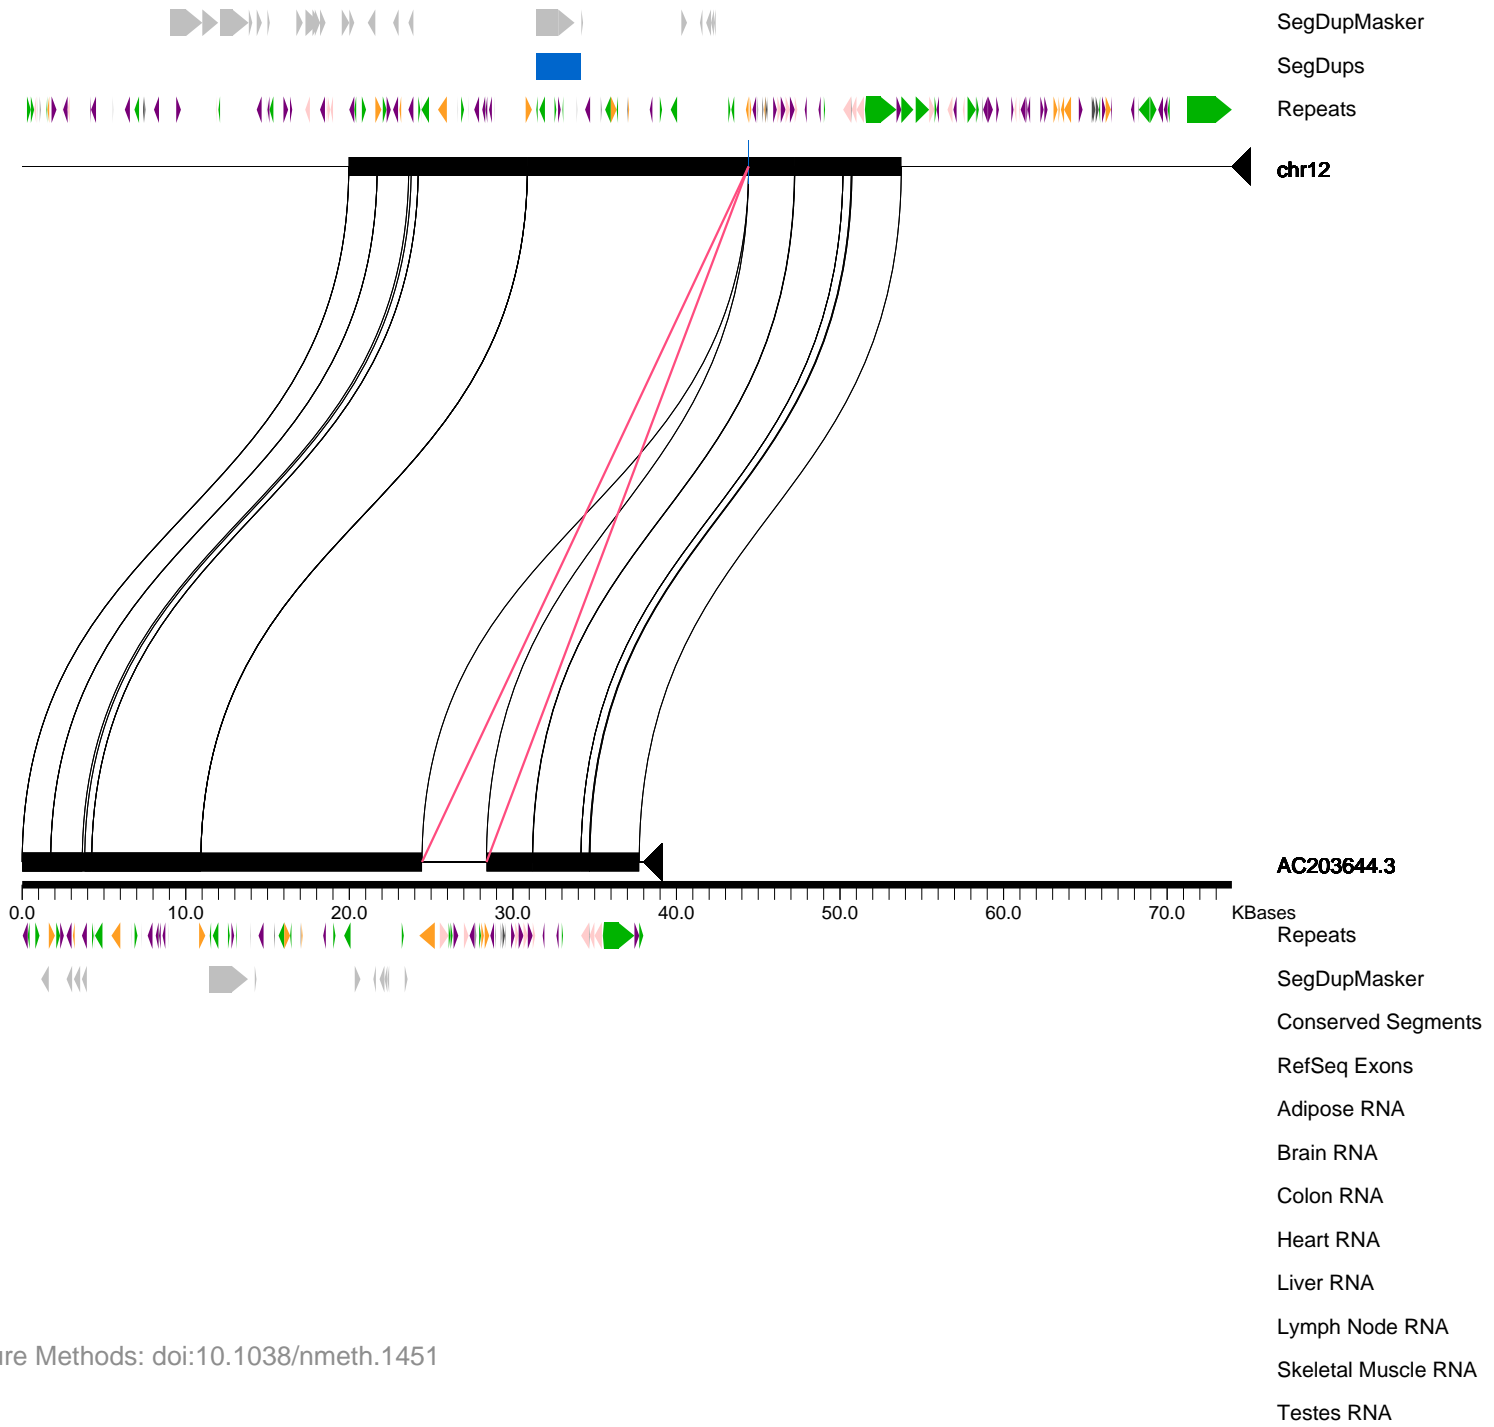

Clone file = AC203665.fa

Insertion Size: 4213

Other Simple Repeat Low Complexity DNA LTR LINE SINE

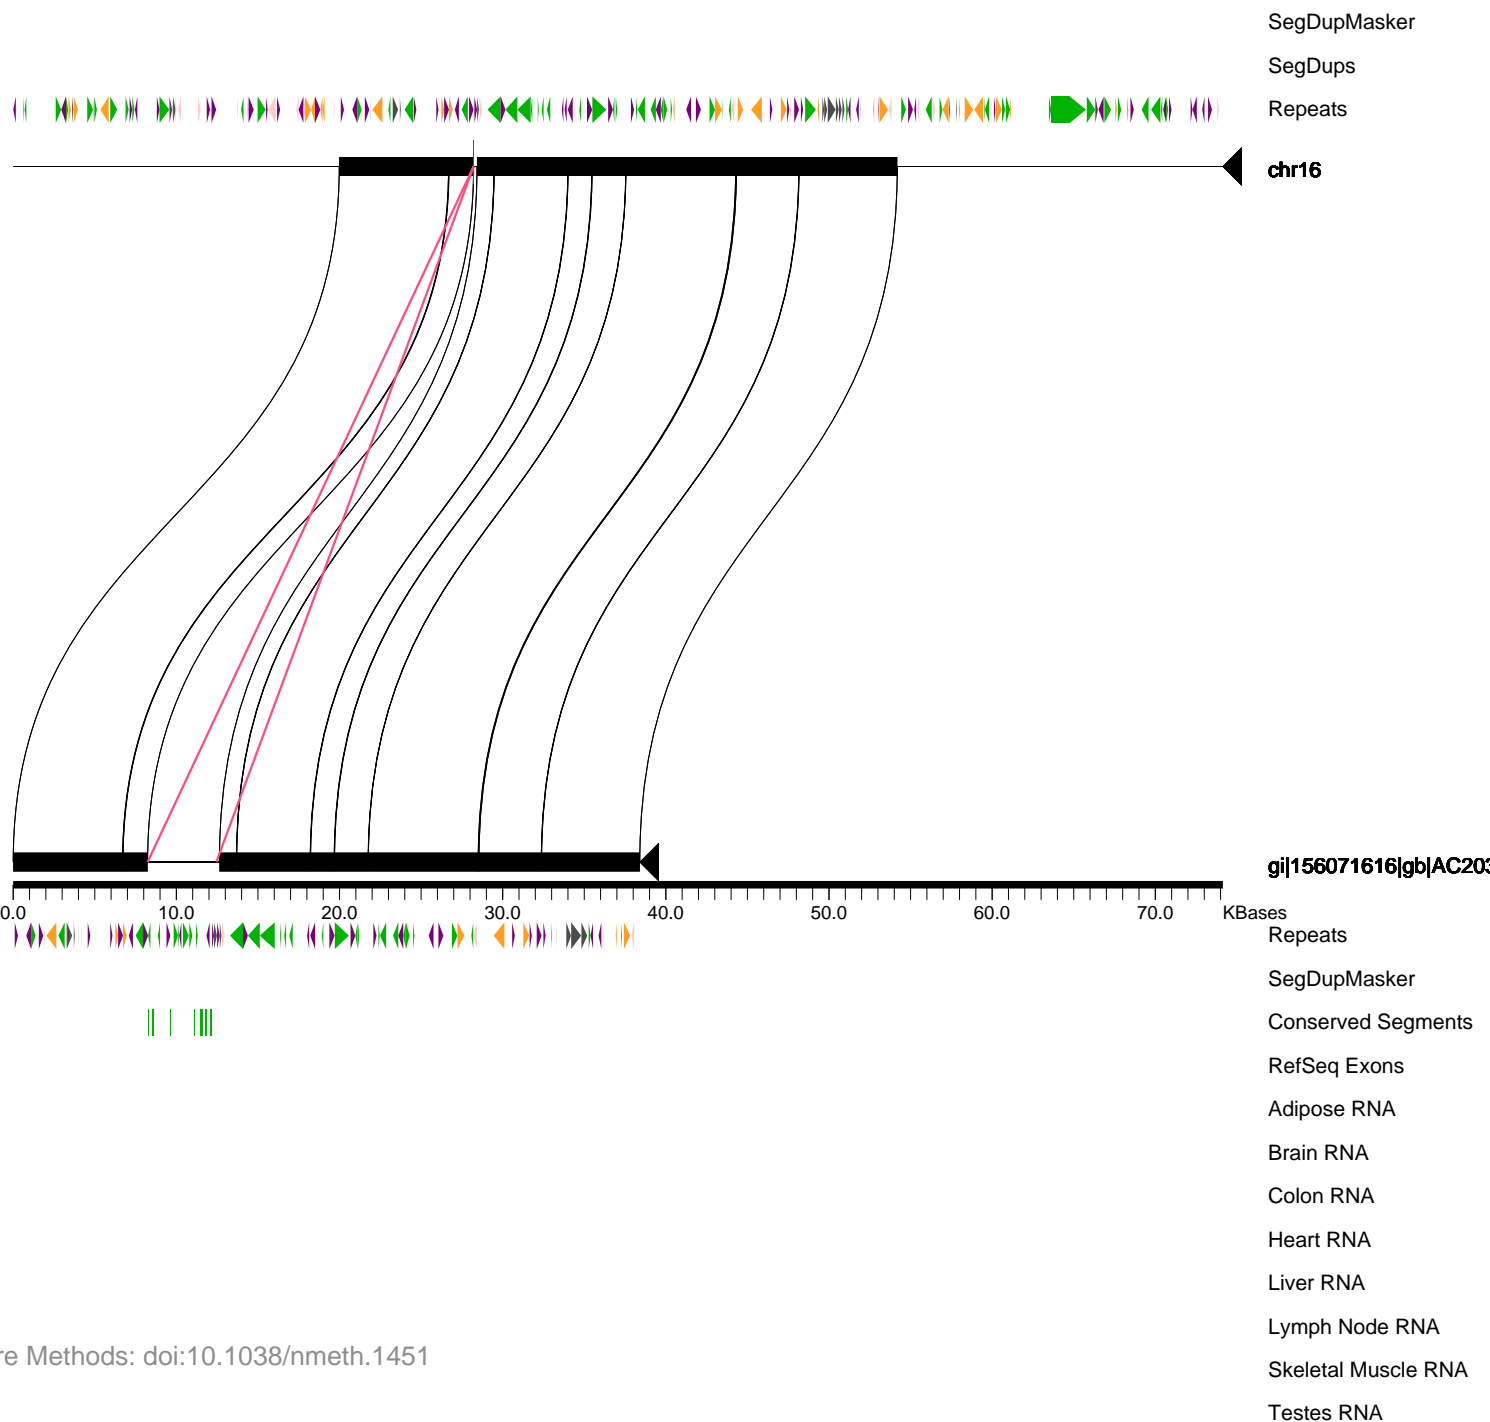

Clone file = AC204963.fa

Insertion Size: 5779

Other Simple Repeat Low Complexity DNA LTR LINE SINE

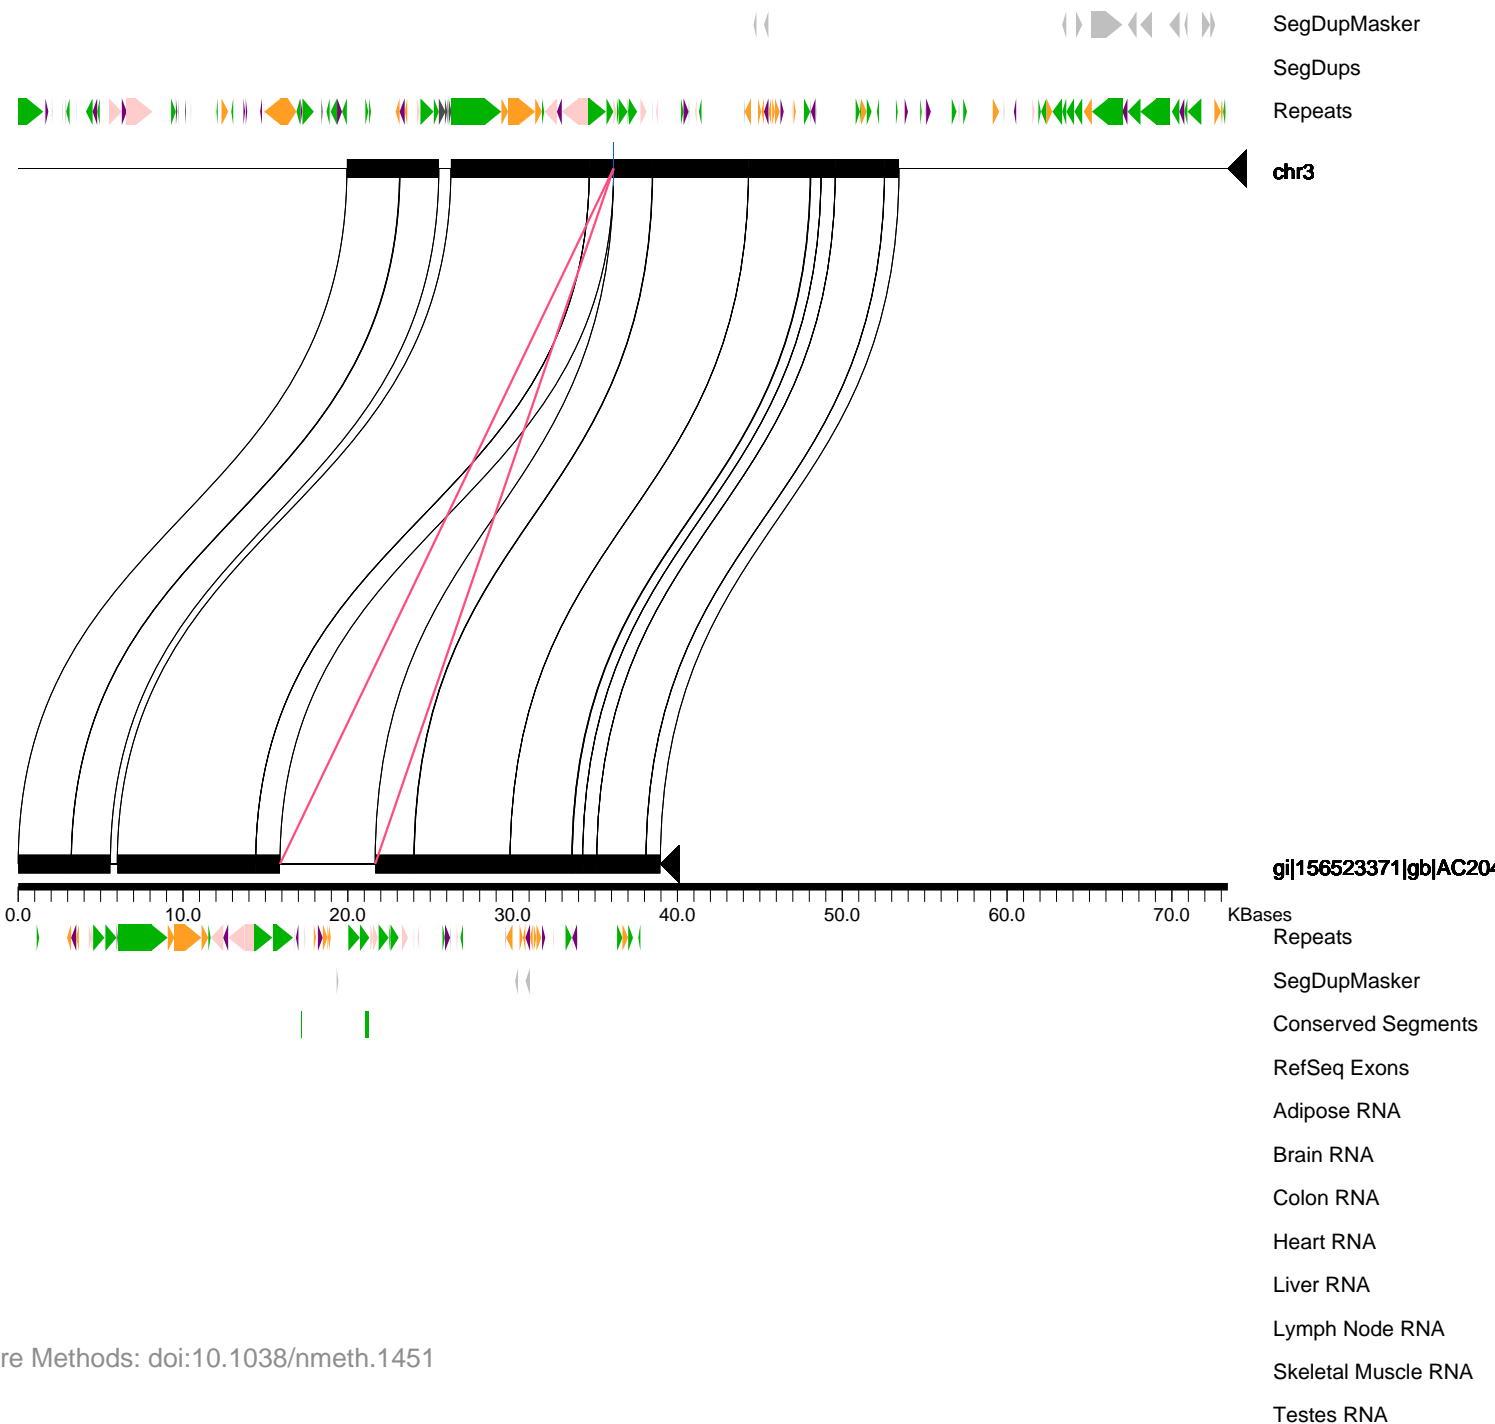

Clone file = AC204971.rc.fa

Insertion Size: 10473

Other Simple Repeat Low Complexity DNA LTR LINE SINE

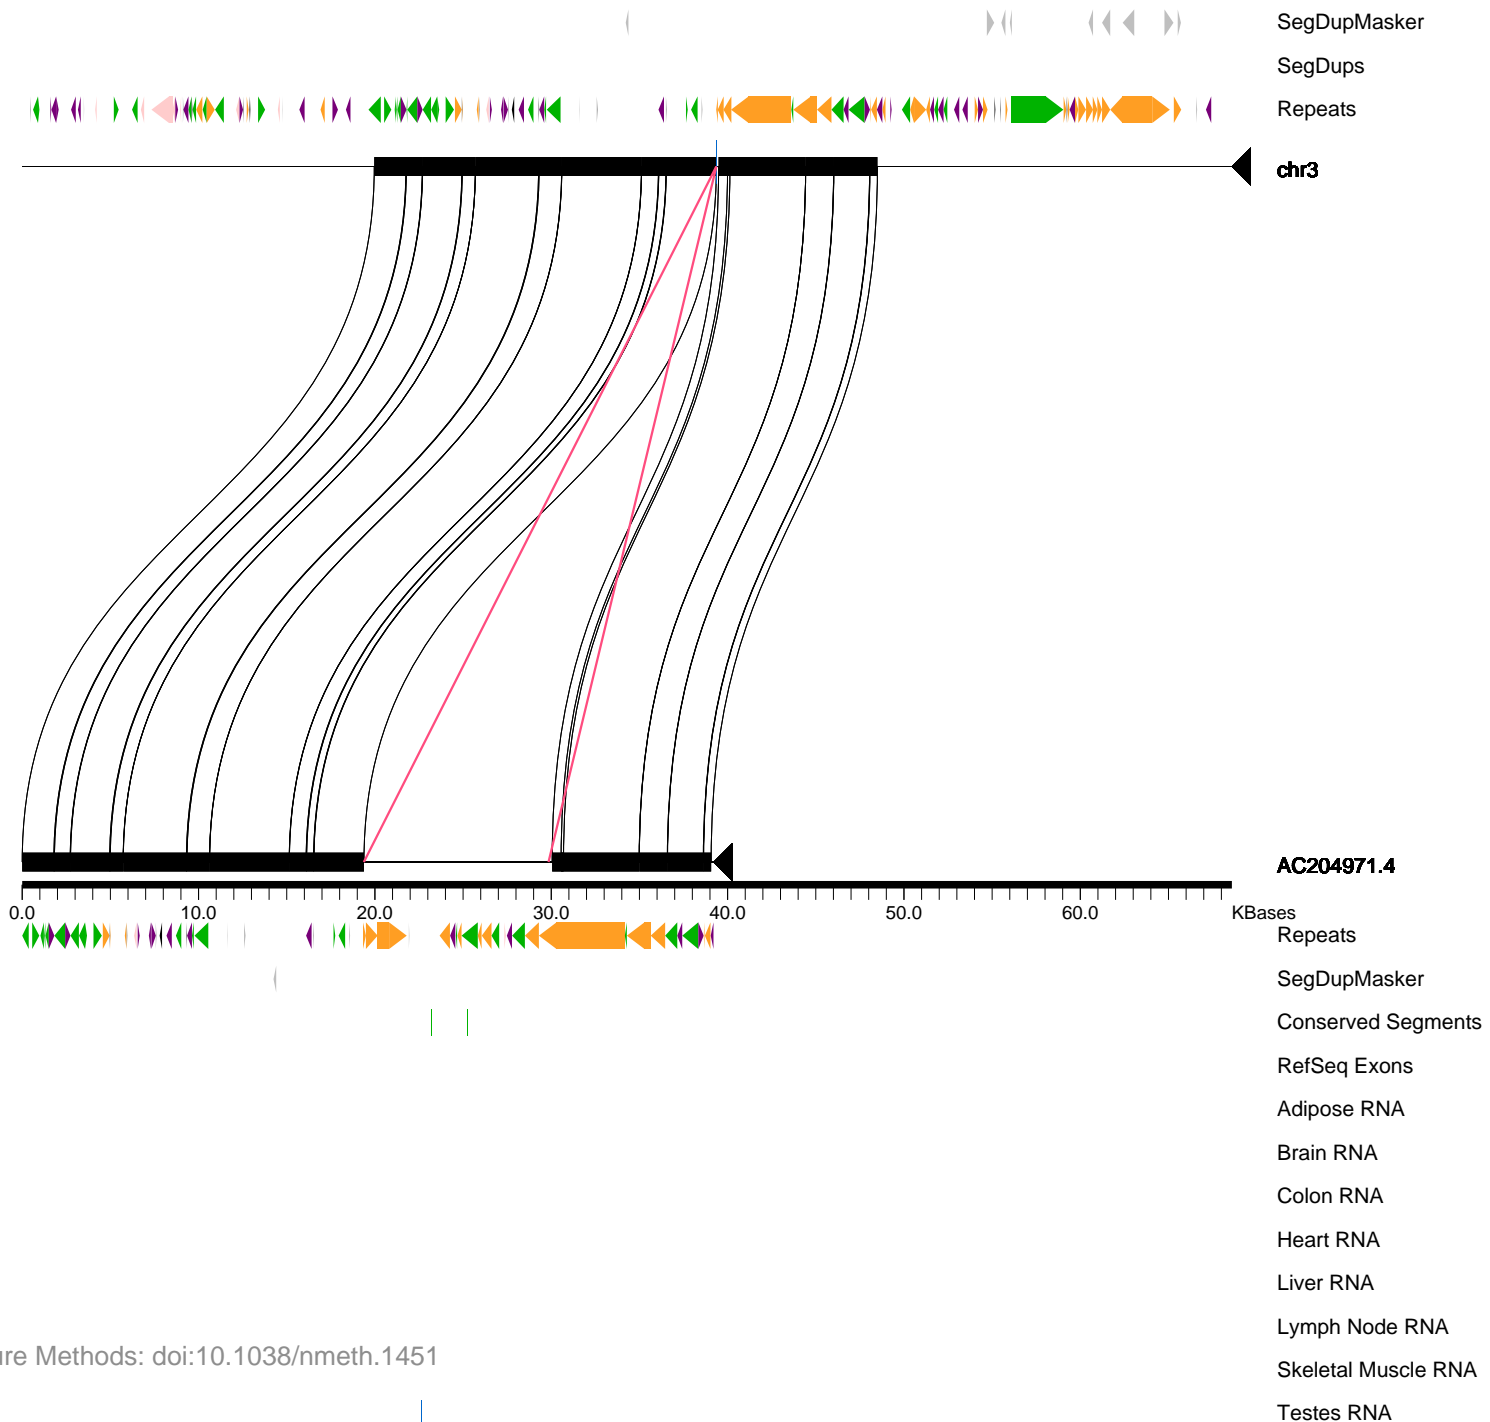

Clone file = AC204972.fa

Insertion Size: 4026

Other Simple Repeat Low Complexity DNA LTR LINE SINE

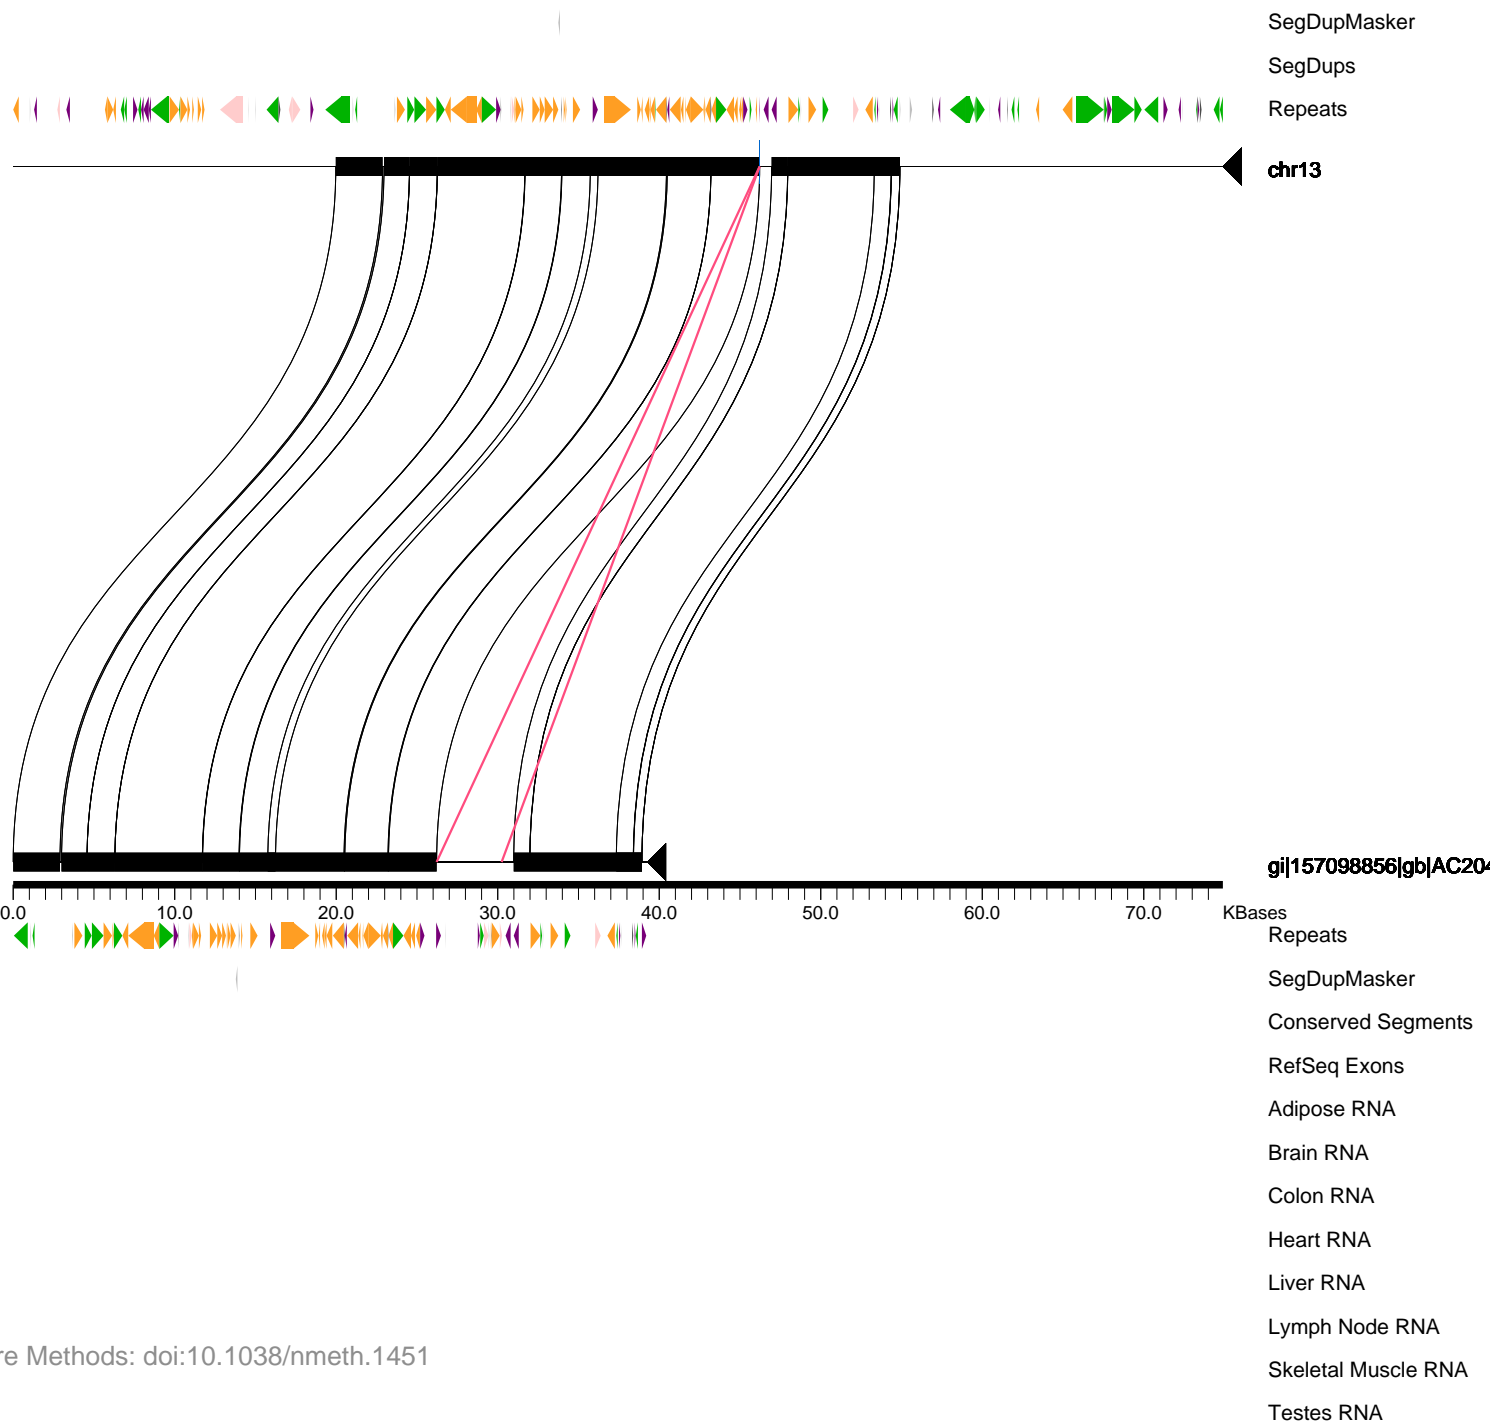

Clone file = AC204974.rc.fa

Insertion Size: 9569

Other Simple Repeat Low Complexity DNA LTR LINE SINE

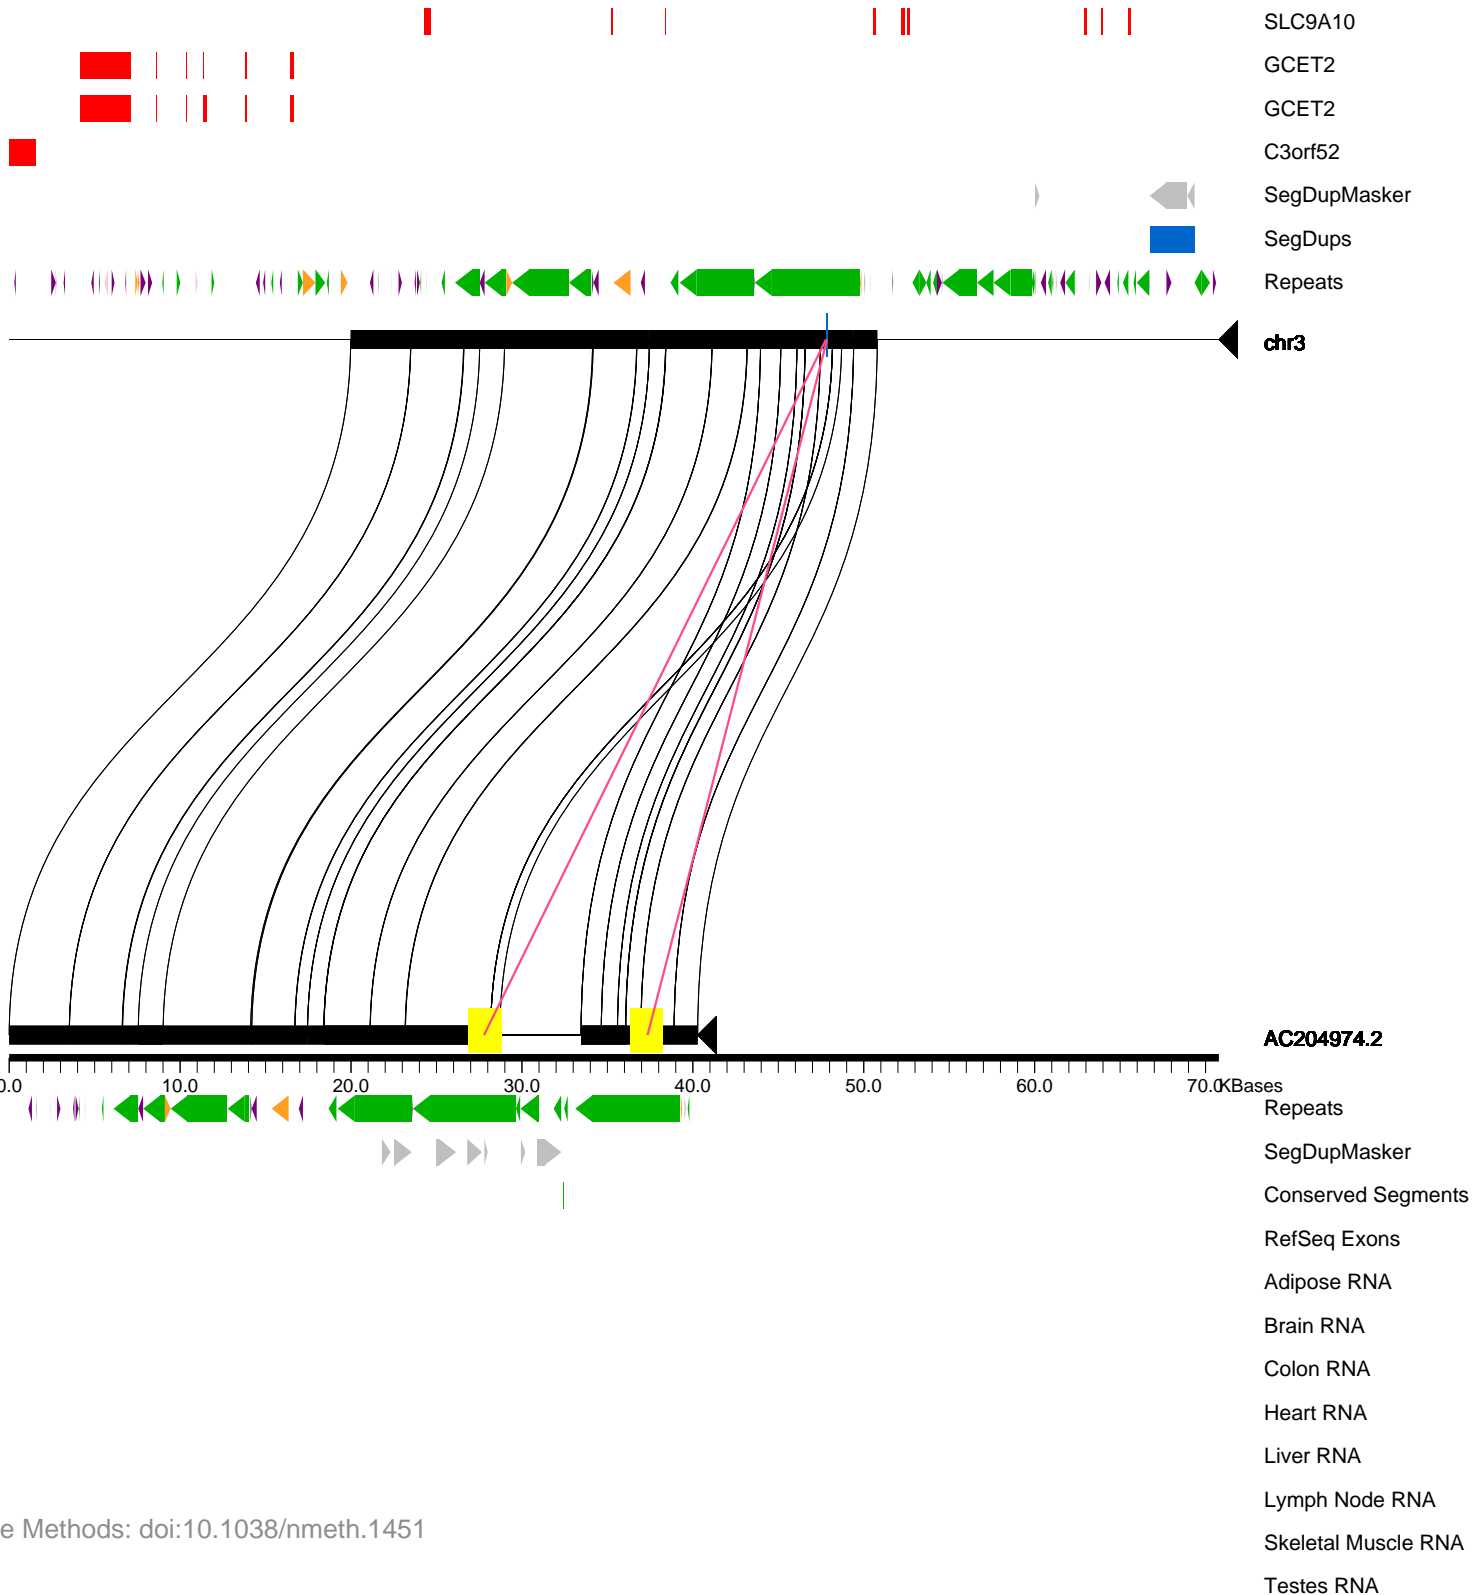



Clone file = AC204980.fa

Insertion Size: 4812

Other Simple Repeat Low Complexity DNA LTR LINE SINE

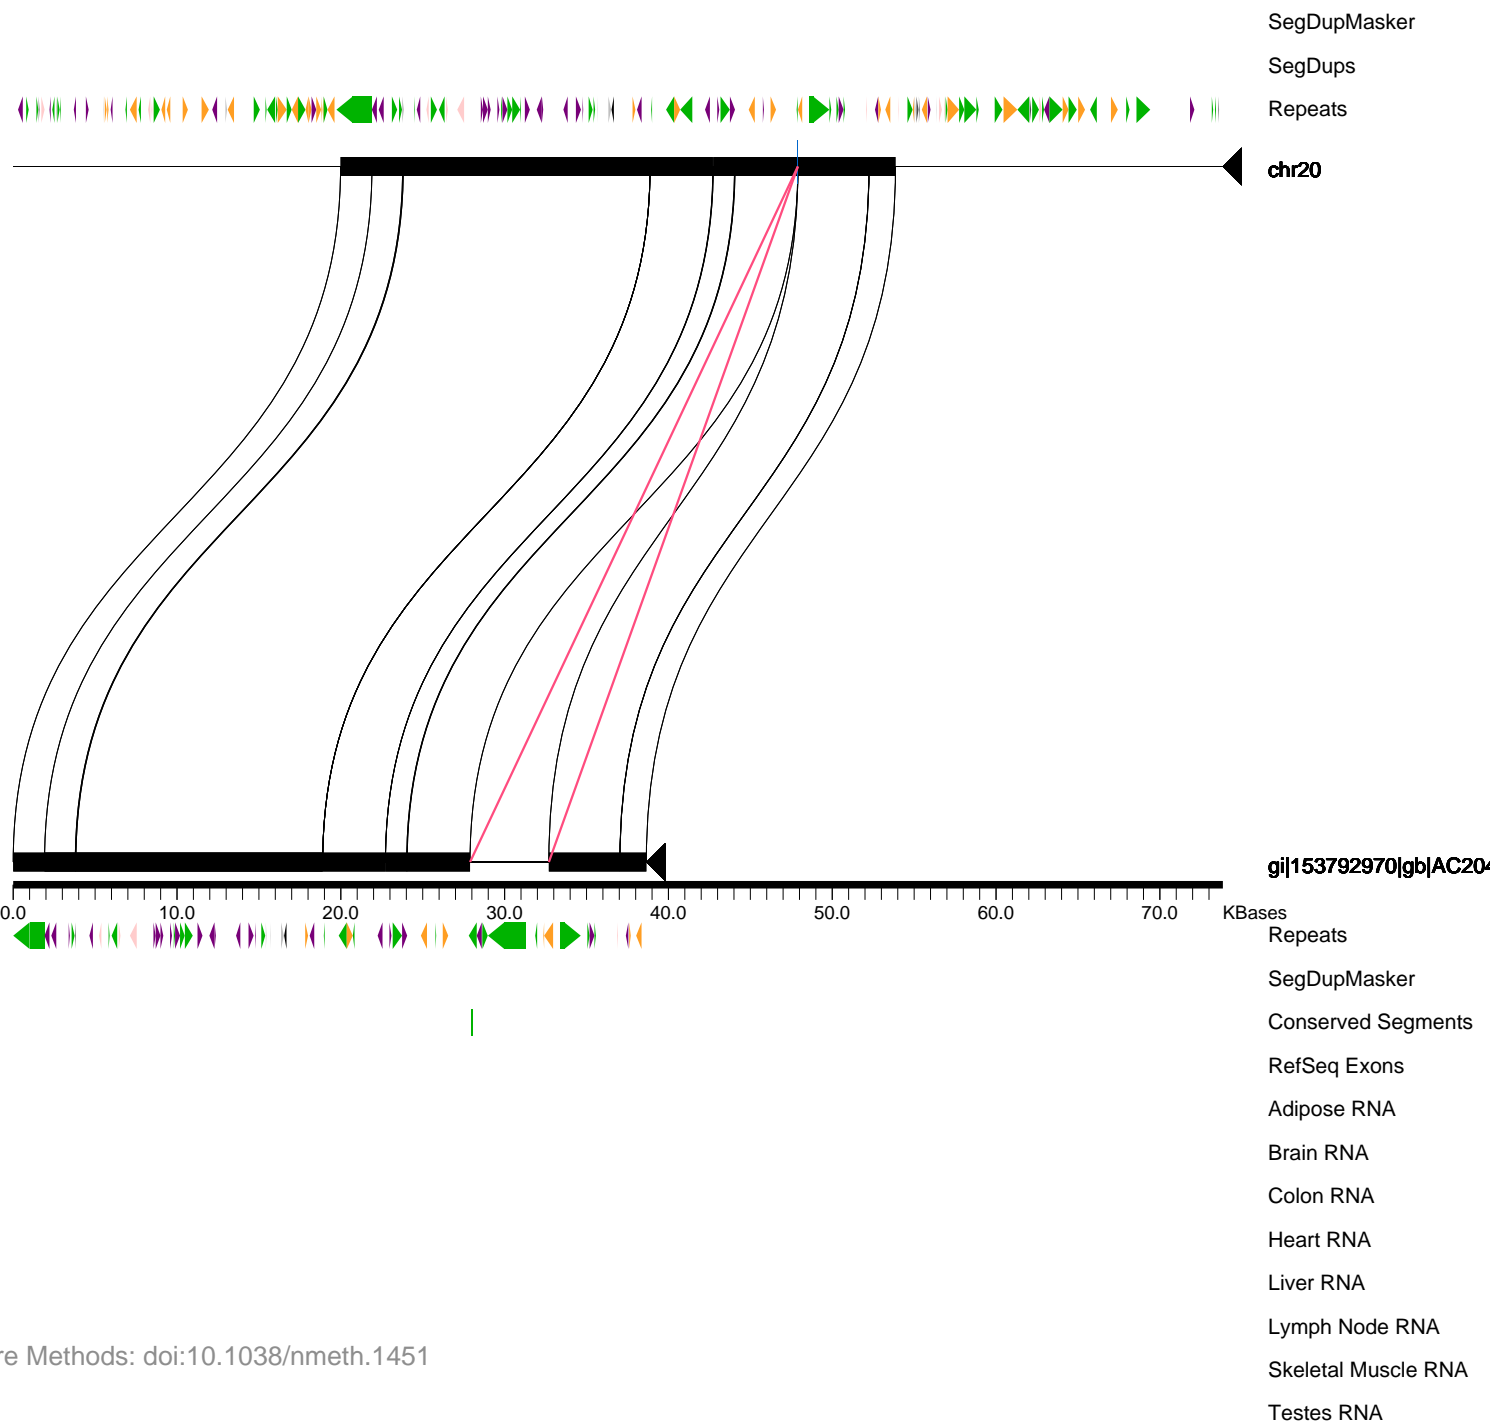

Clone file = AC205876.rc.fa

Insertion Size: 4821

Other Simple Repeat Low Complexity DNA LTR LINE SINE

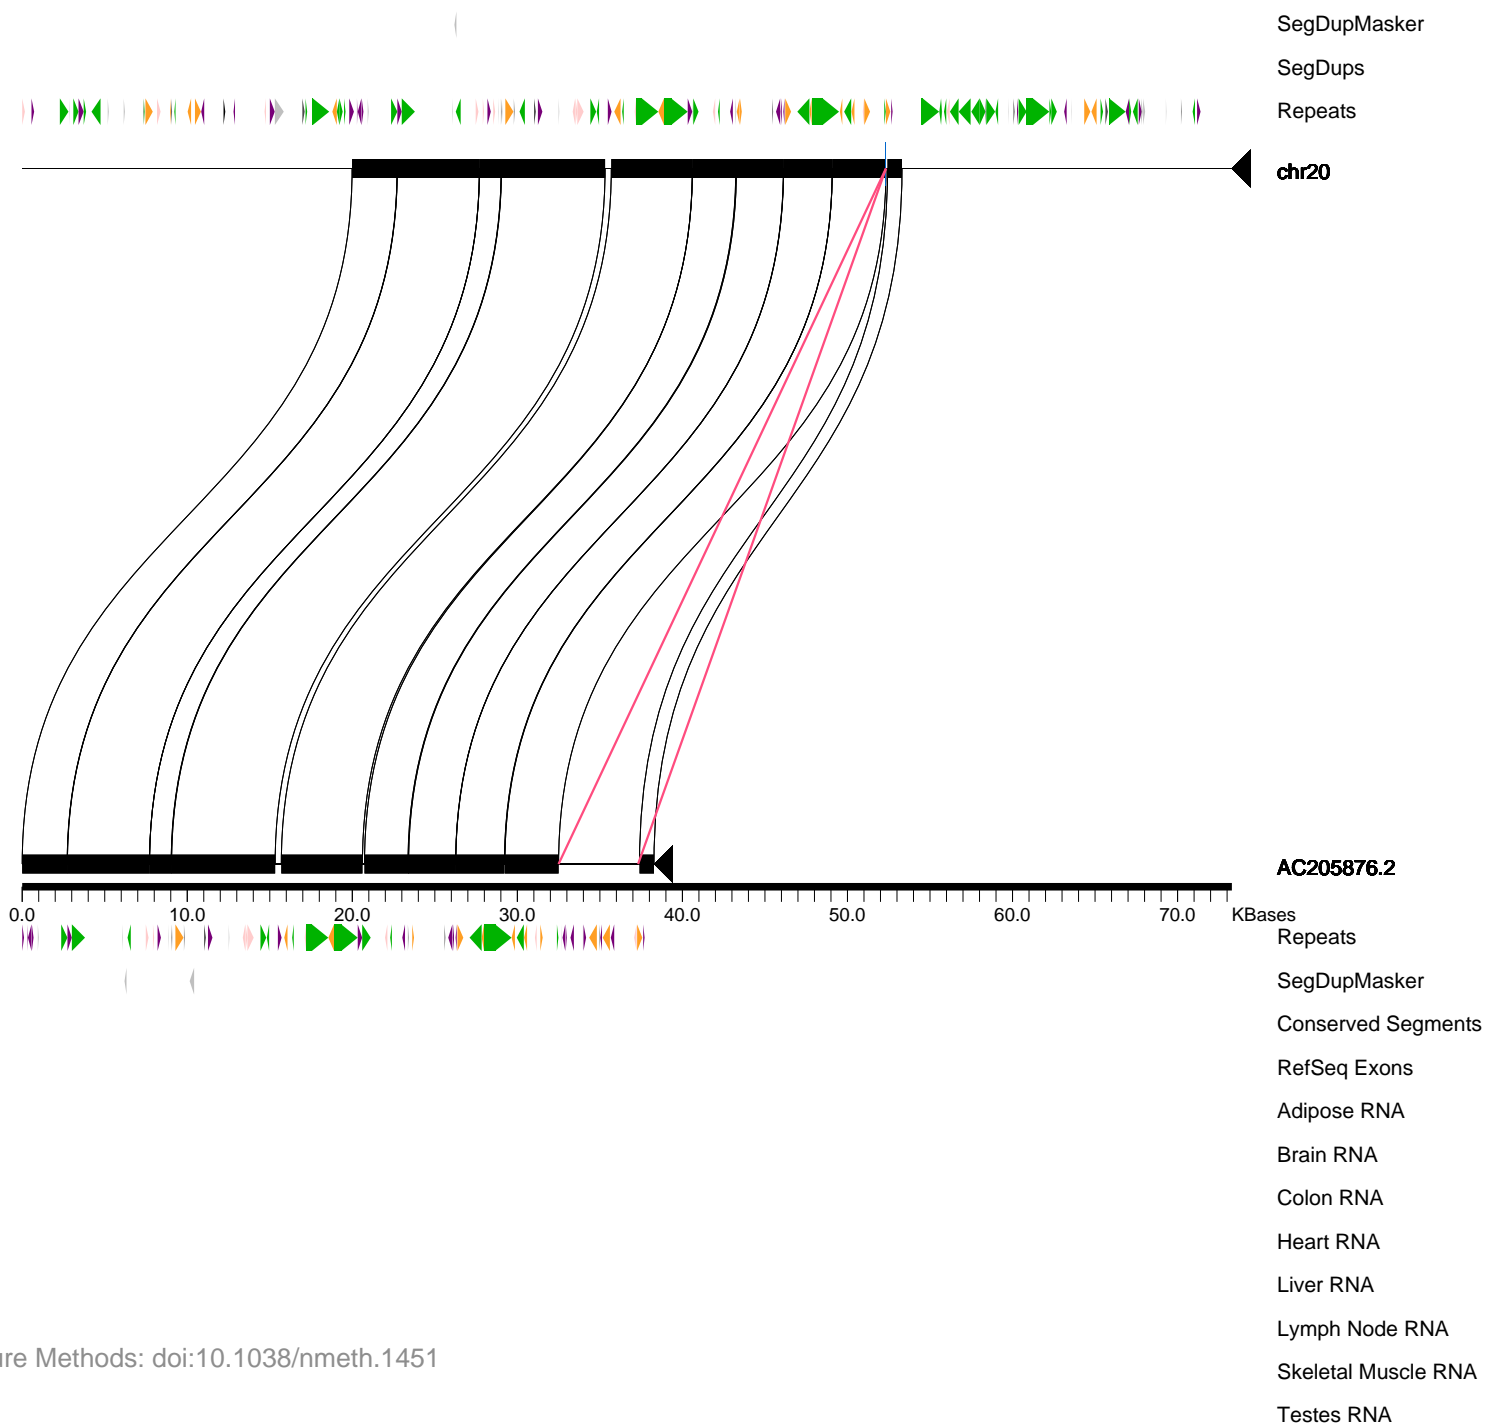

Clone file = AC205940.rc.fa

Insertion Size: 2912

Other Simple Repeat Low Complexity DNA LTR LINE SINE

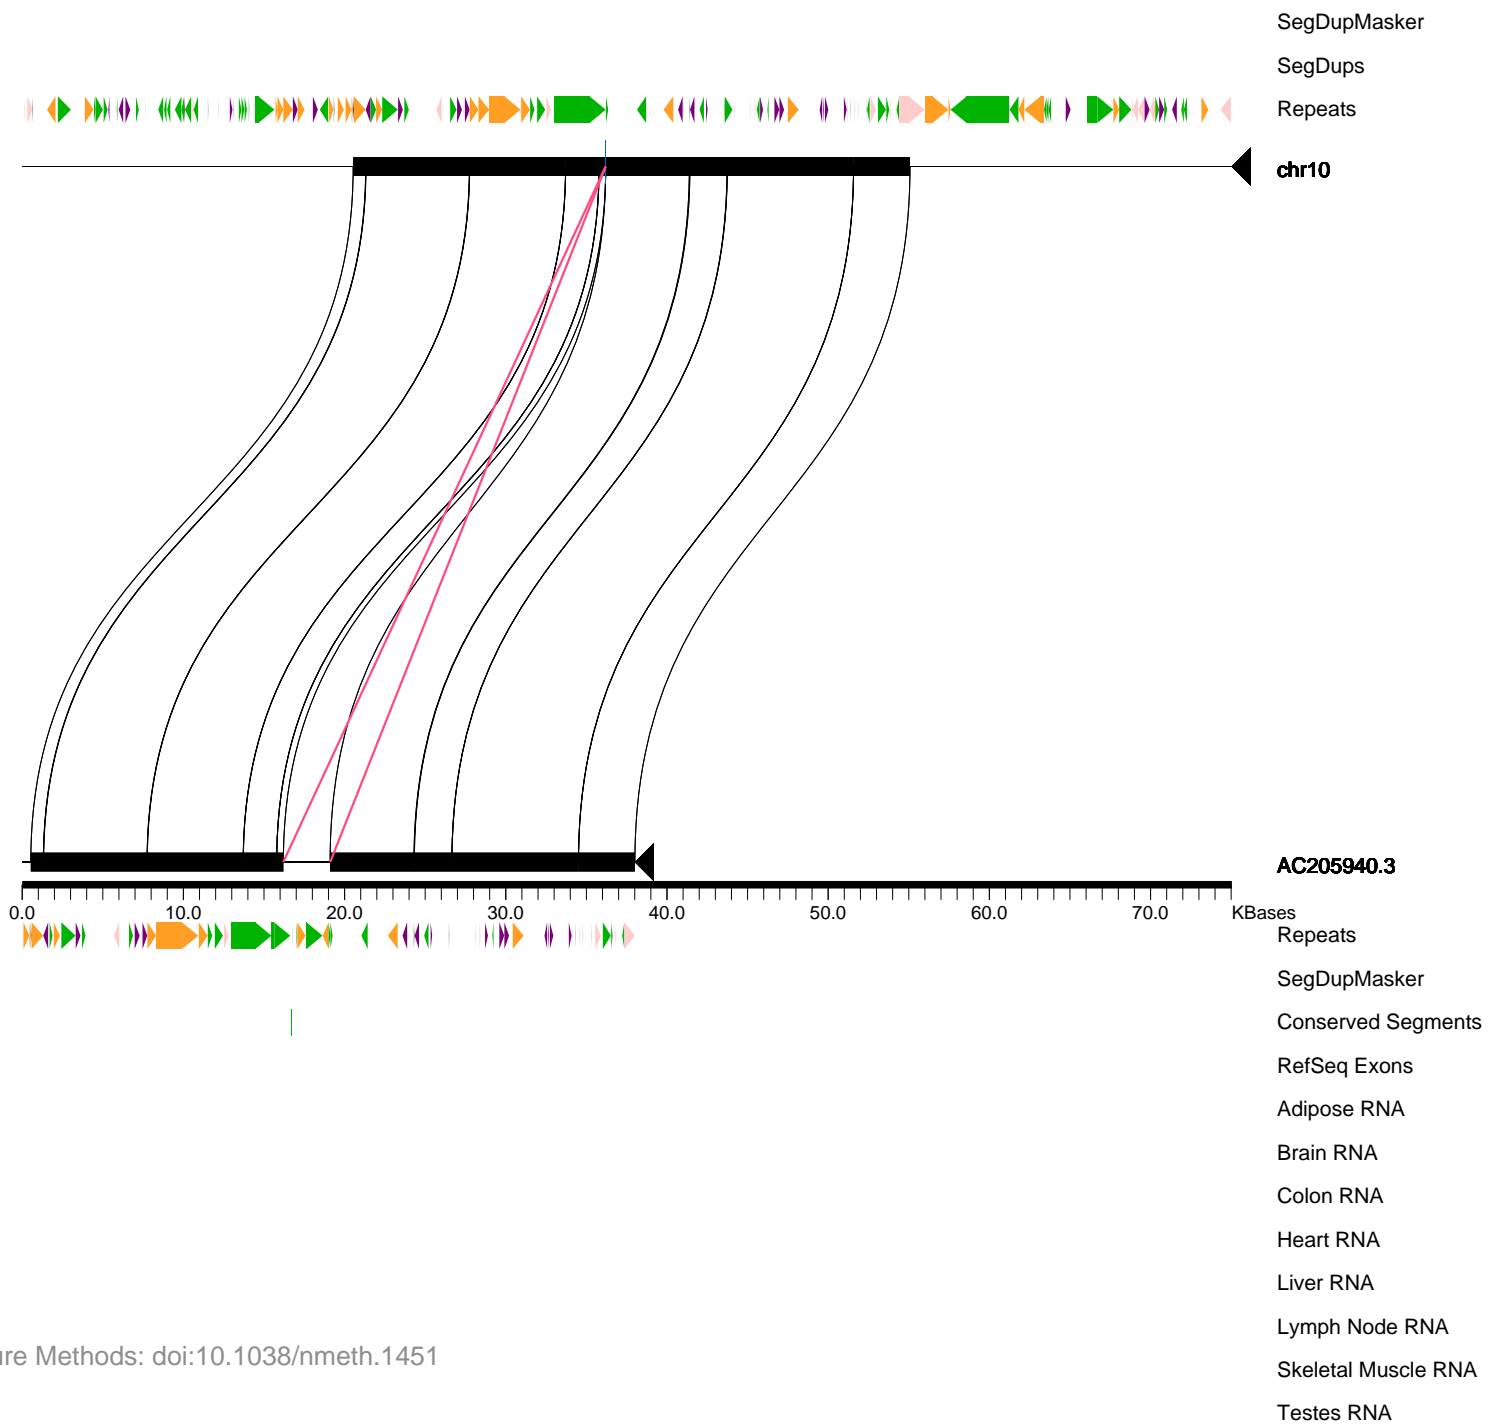

Clone file = AC206437.fa

Insertion Size: 19270

Other Simple Repeat Low Complexity DNA LTR LINE SINE

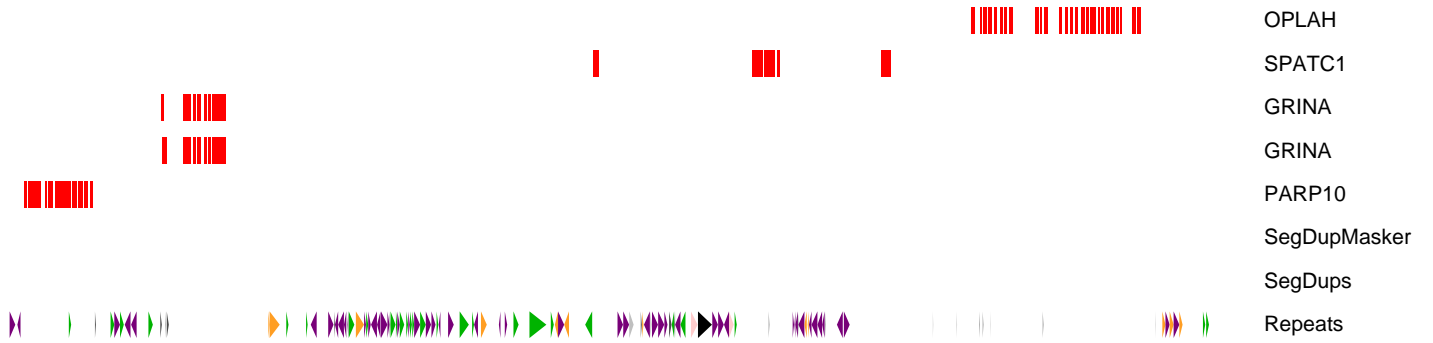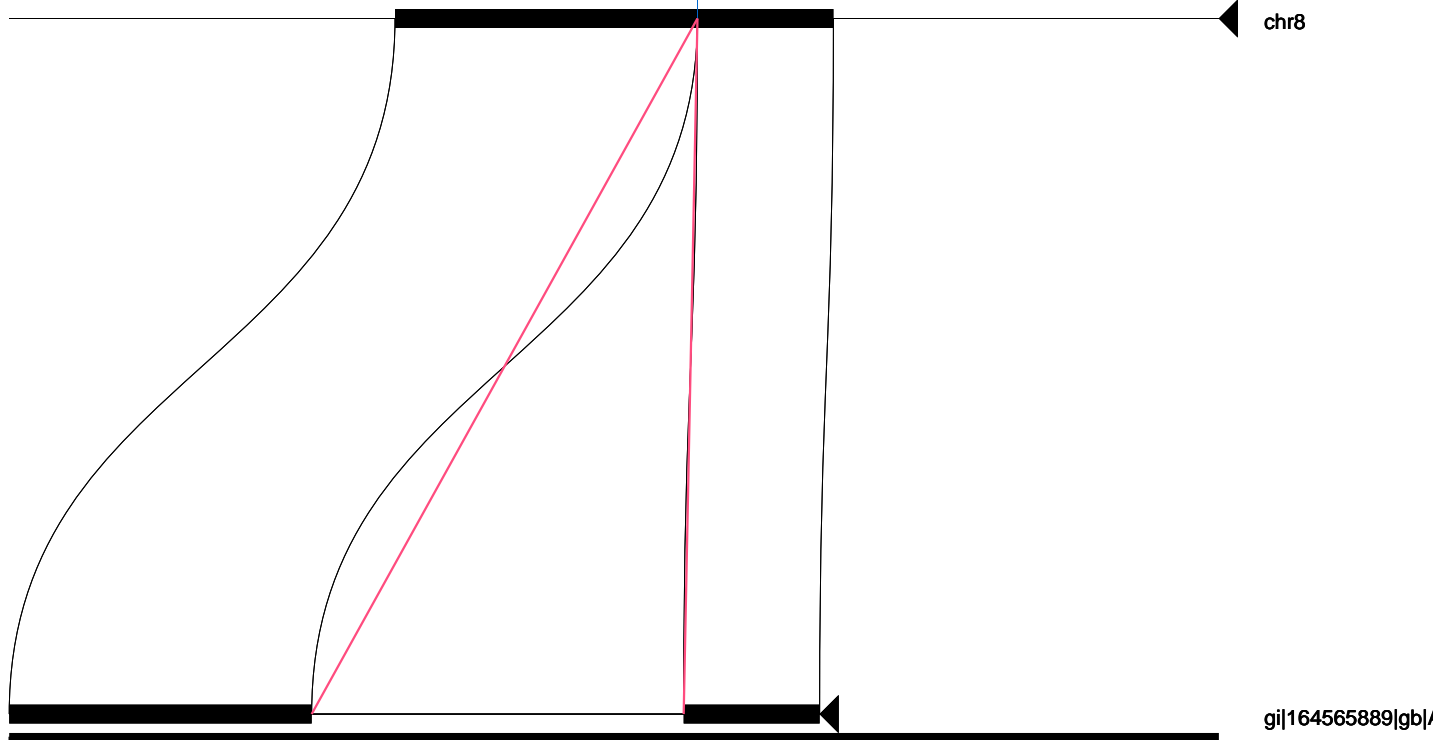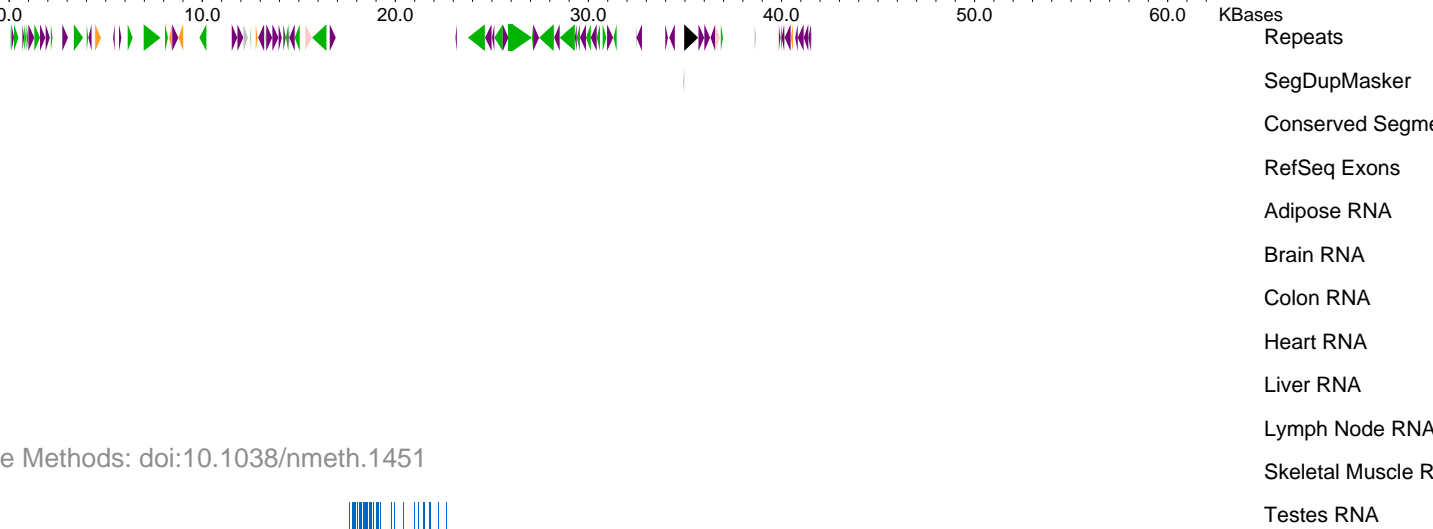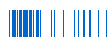

Clone file = AC206474.fa

Insertion Size: 3187

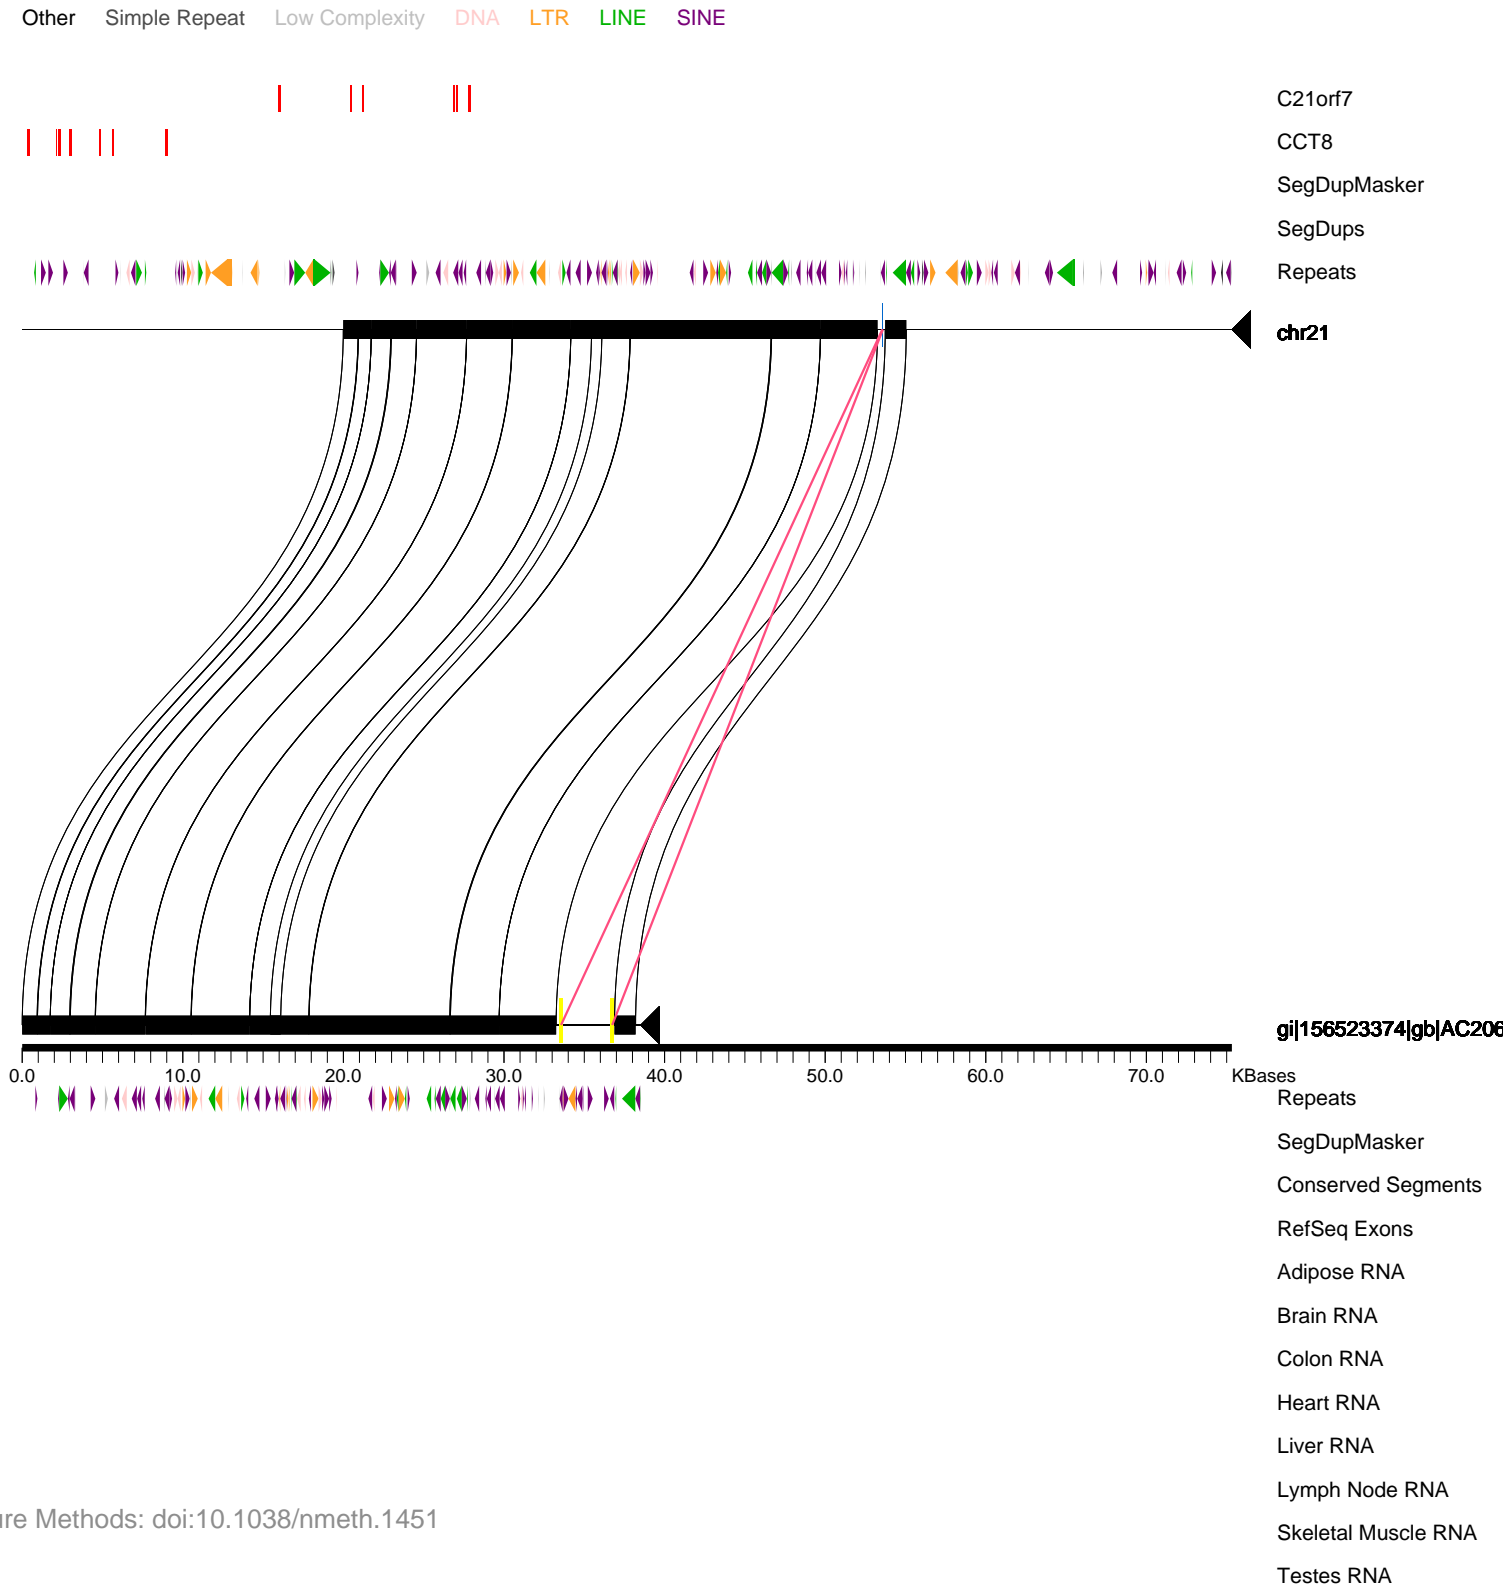

Clone file = AC206479.fa

Insertion Size: 3986

Other Simple Repeat Low Complexity DNA LTR LINE SINE

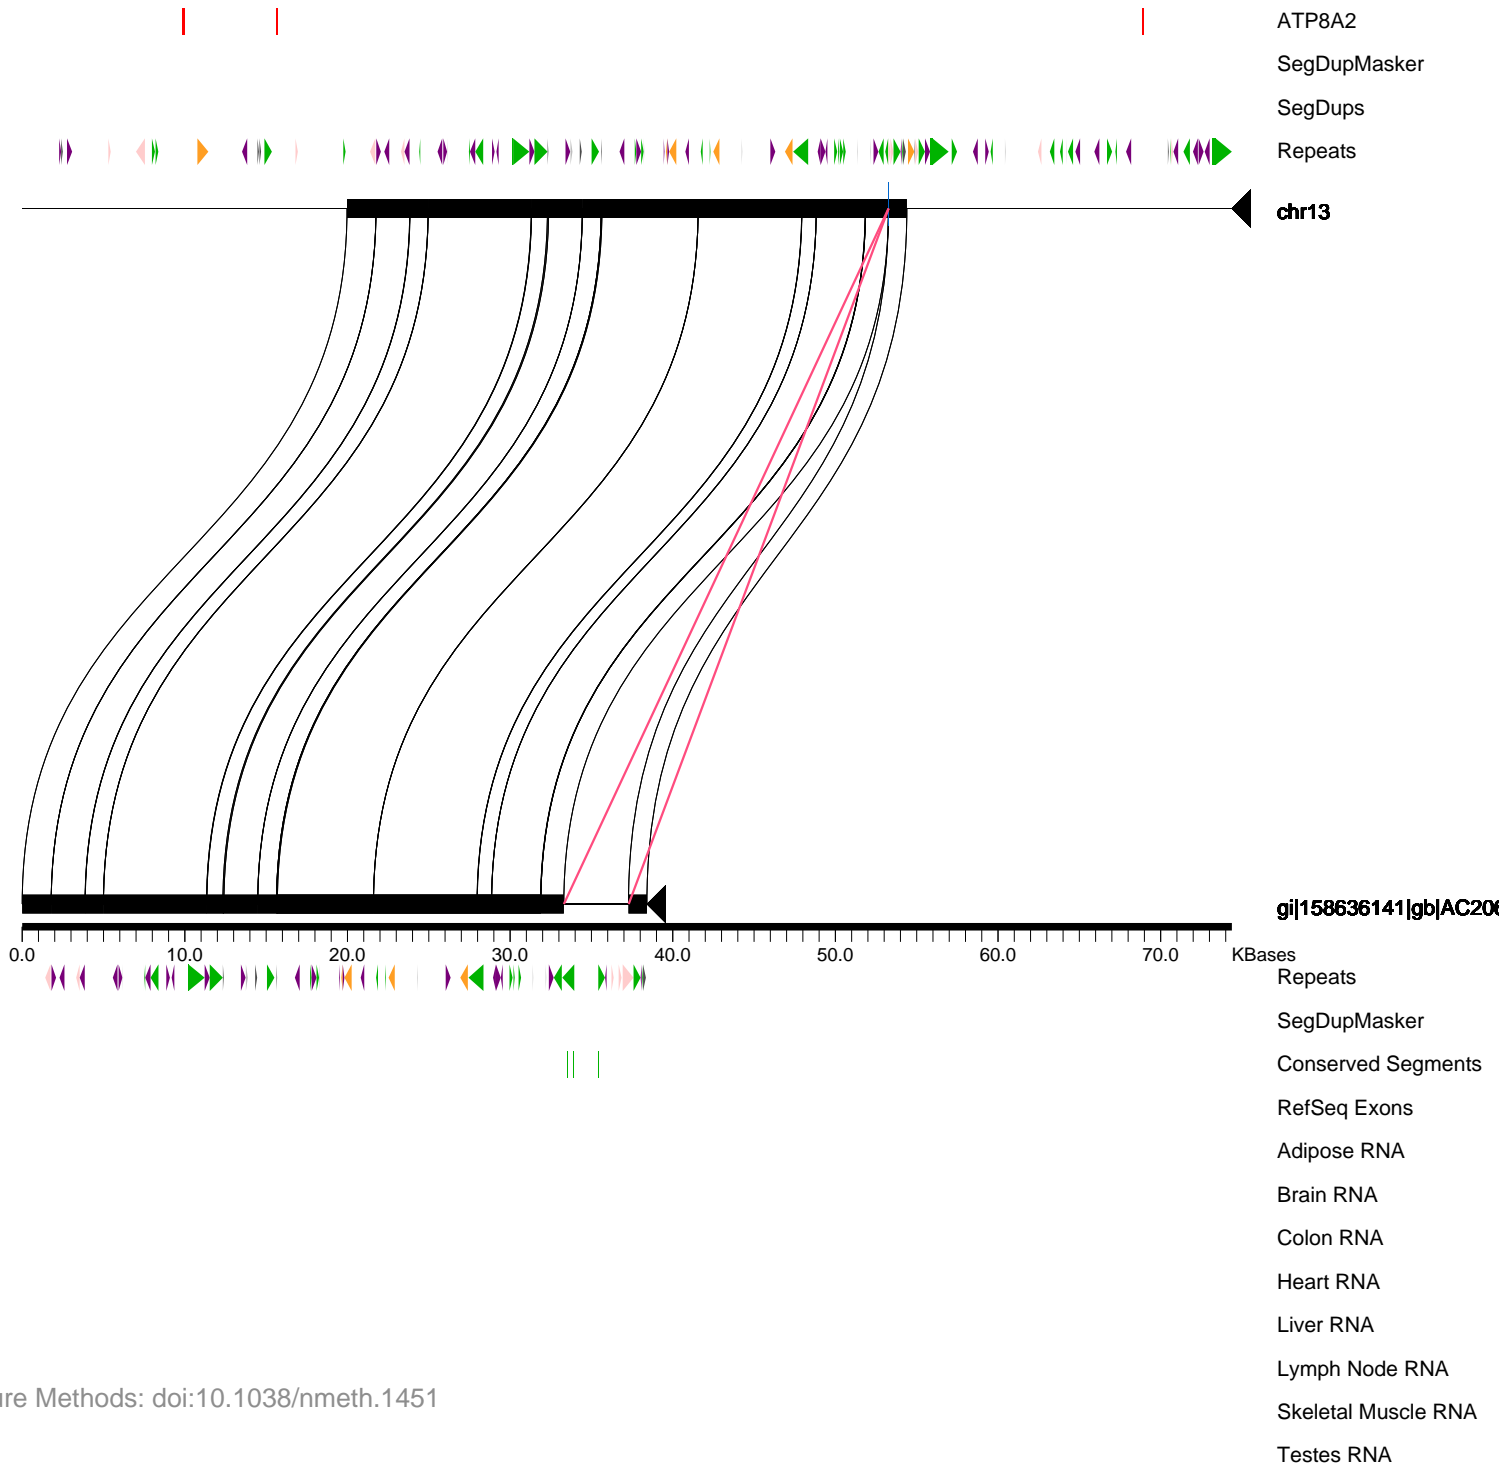

Clone file = AC206484.rc.fa

Insertion Size: 3848

Other Simple Repeat Low Complexity DNA LTR LINE SINE

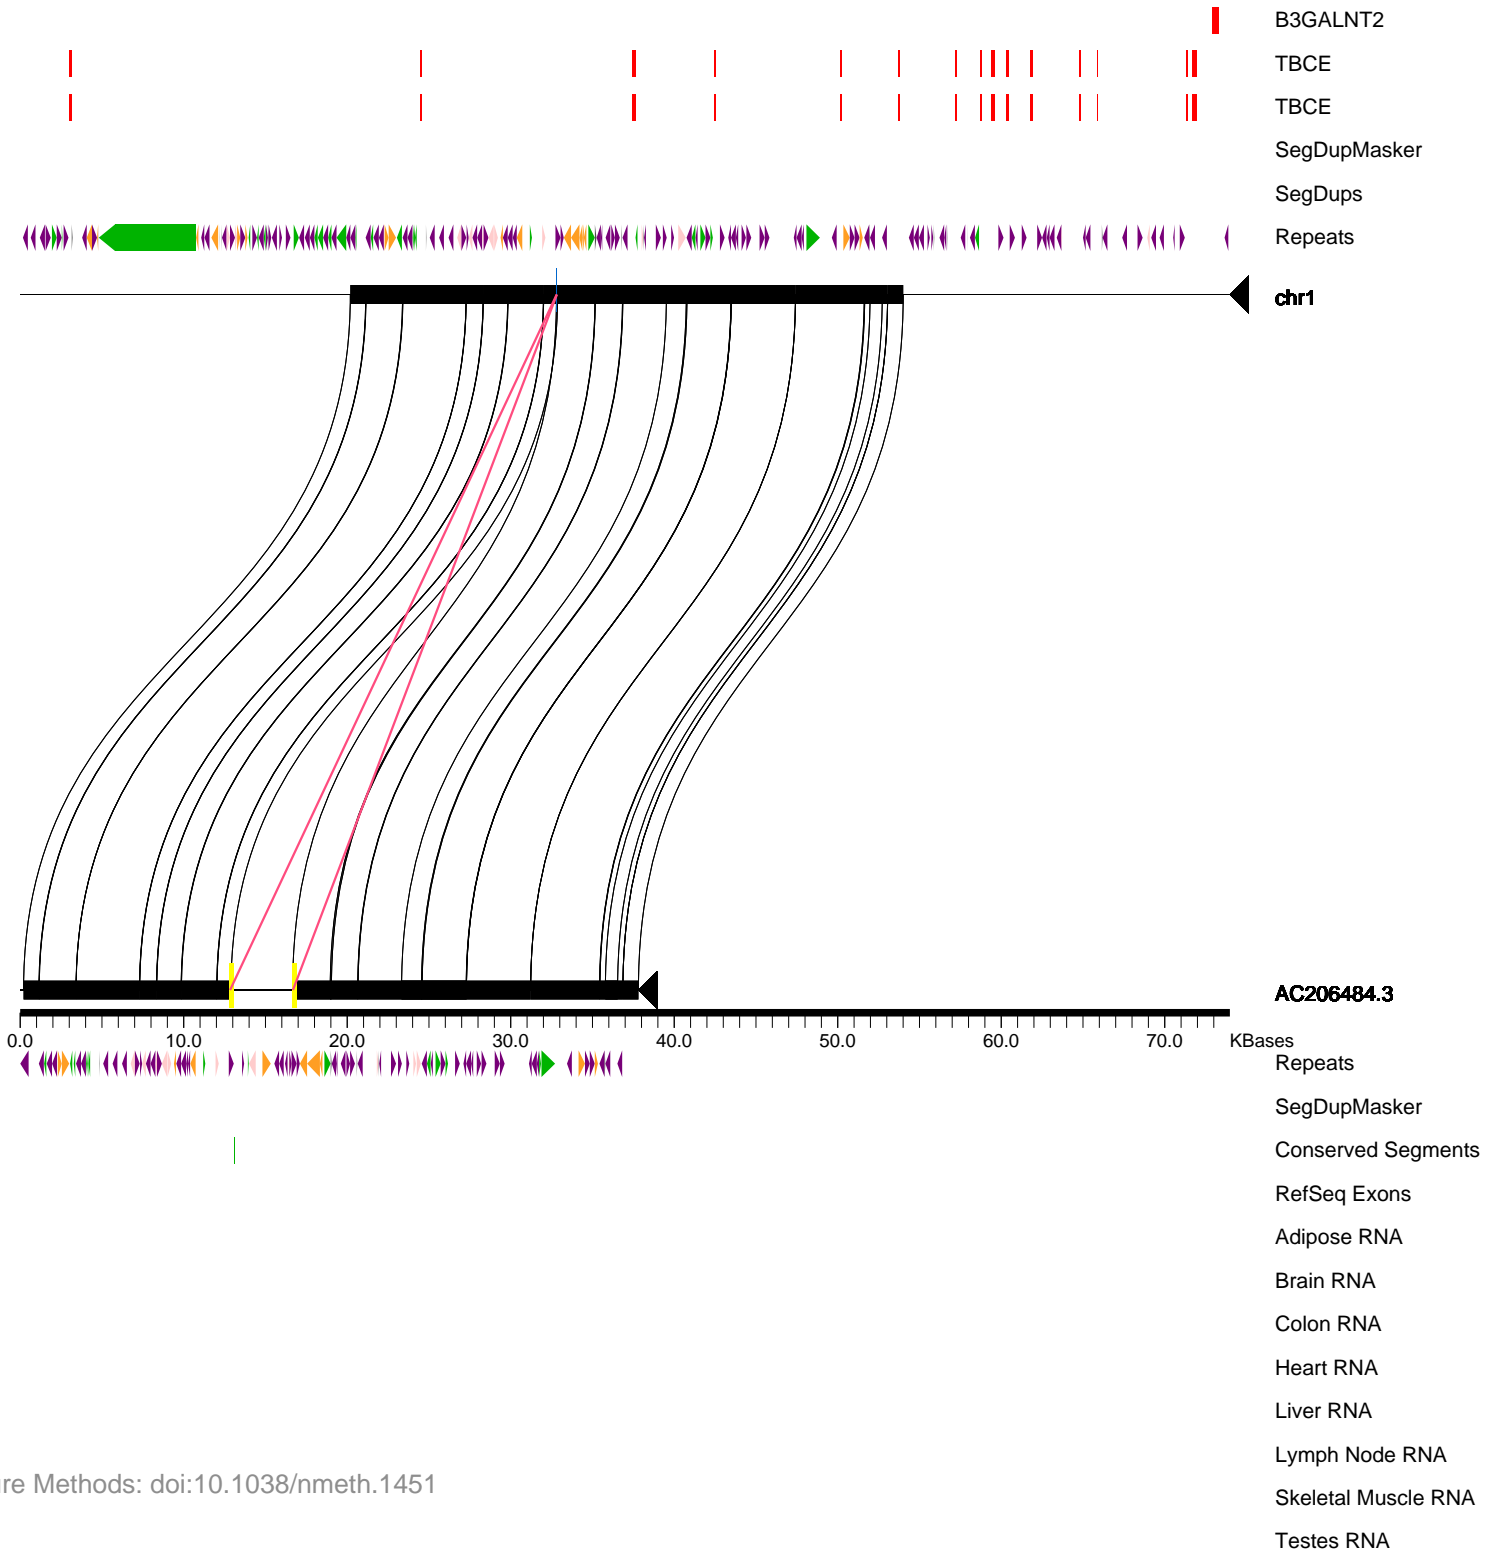

Clone file = AC206609.fa

Insertion Size: 1853

Other Simple Repeat Low Complexity DNA LTR LINE SINE

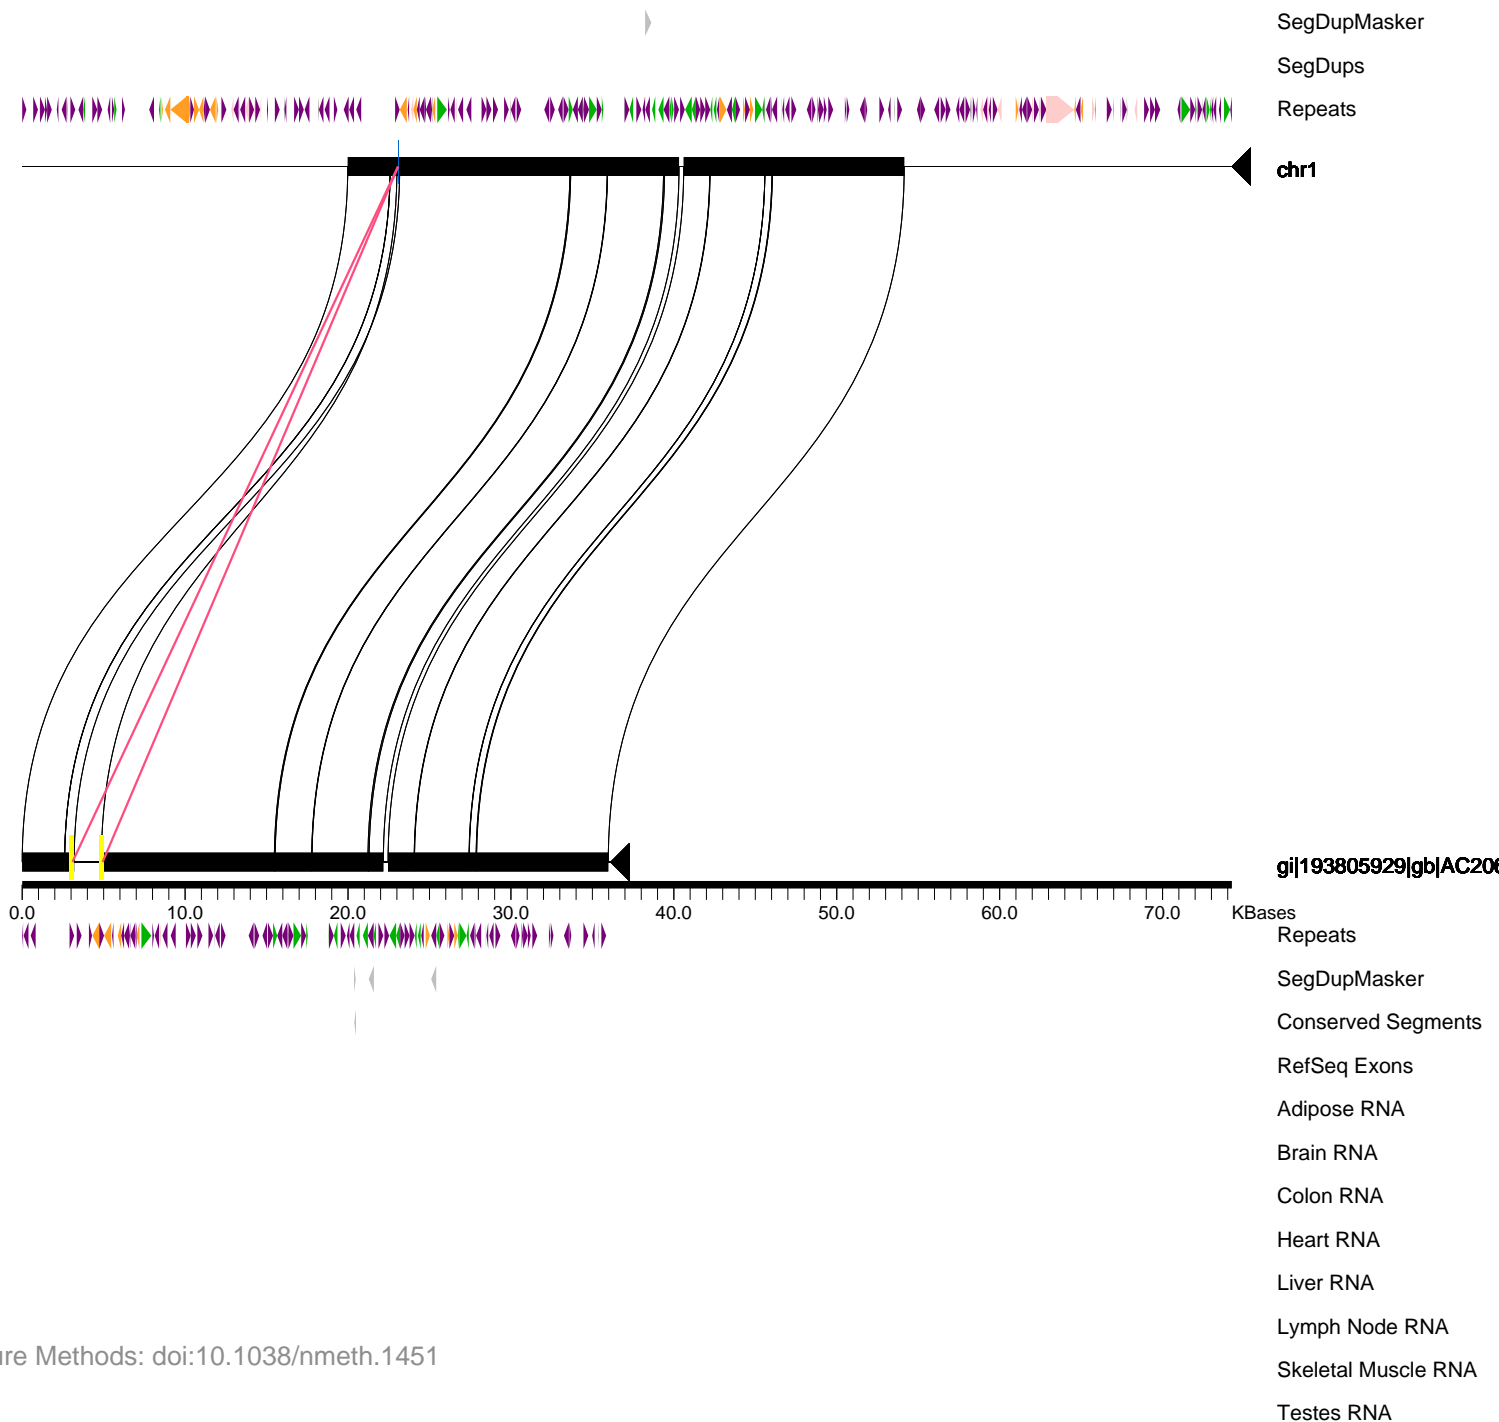



Clone file = AC206743.fa

Insertion Size: 12617

Other Simple Repeat Low Complexity DNA LTR LINE SINE

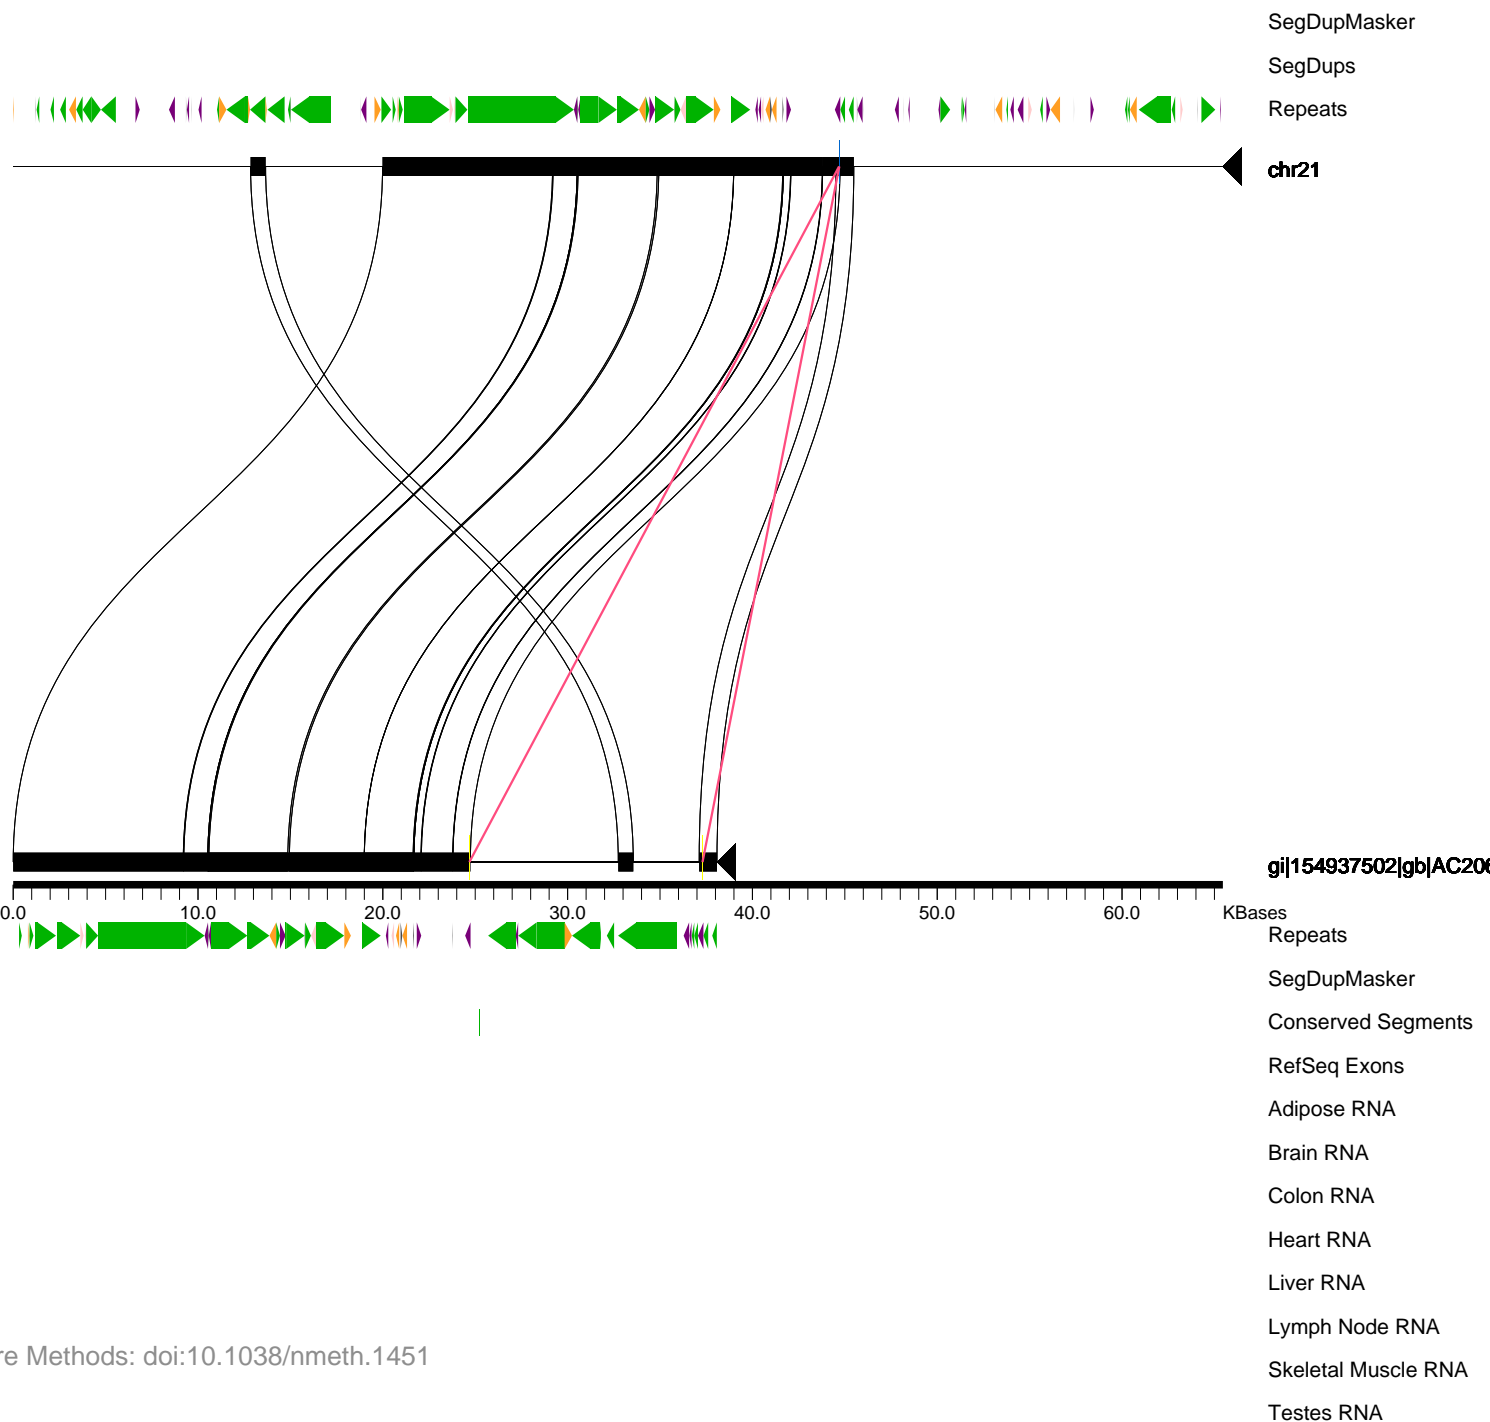

Clone file = AC206930.rc.fa

Insertion Size: 3284

Other Simple Repeat Low Complexity DNA LTR LINE SINE

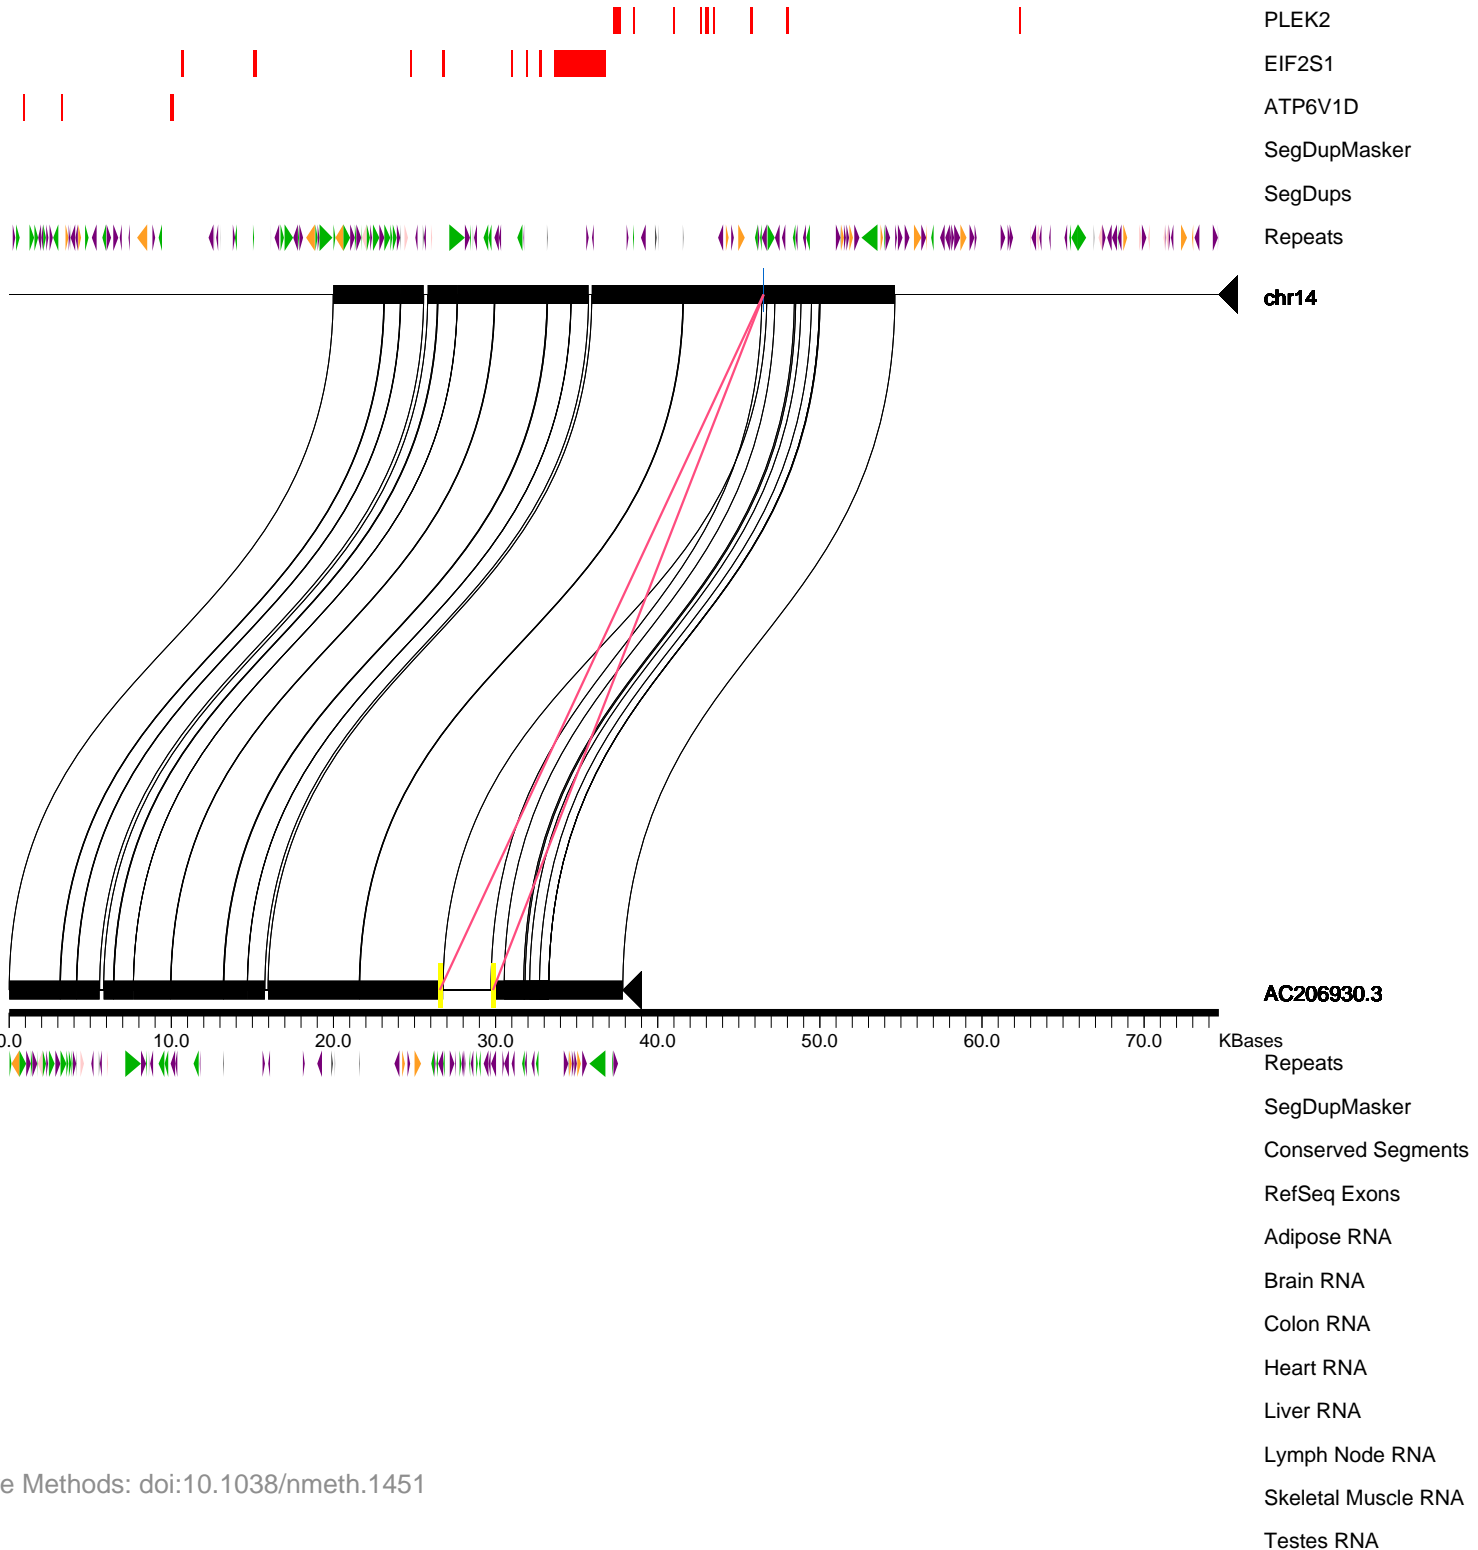

Clone file = AC207173.rc.fa

Insertion Size: 2721

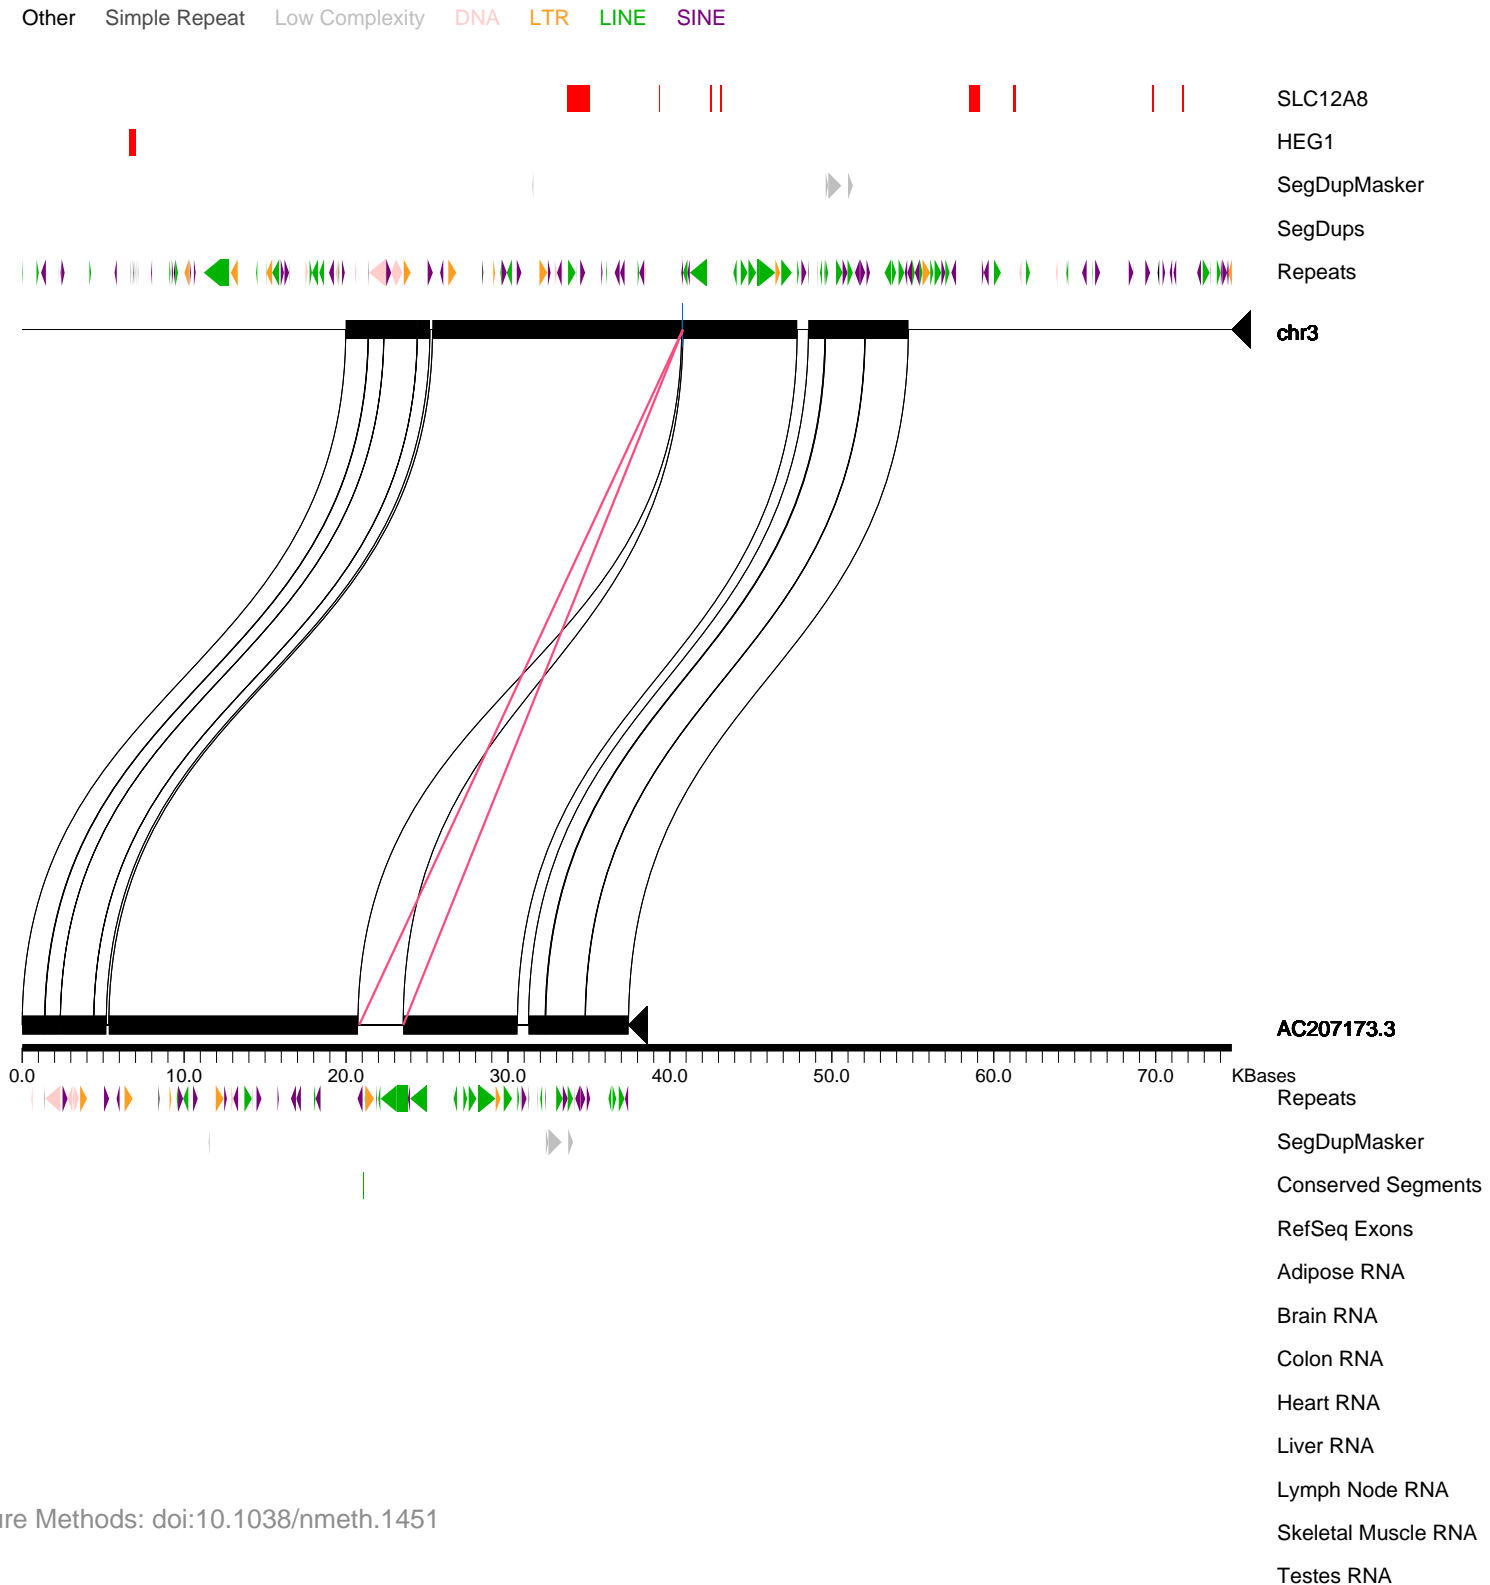

Clone file = AC207300.rc.fa

Insertion Size: 4274

Other Simple Repeat Low Complexity DNA LTR LINE SINE

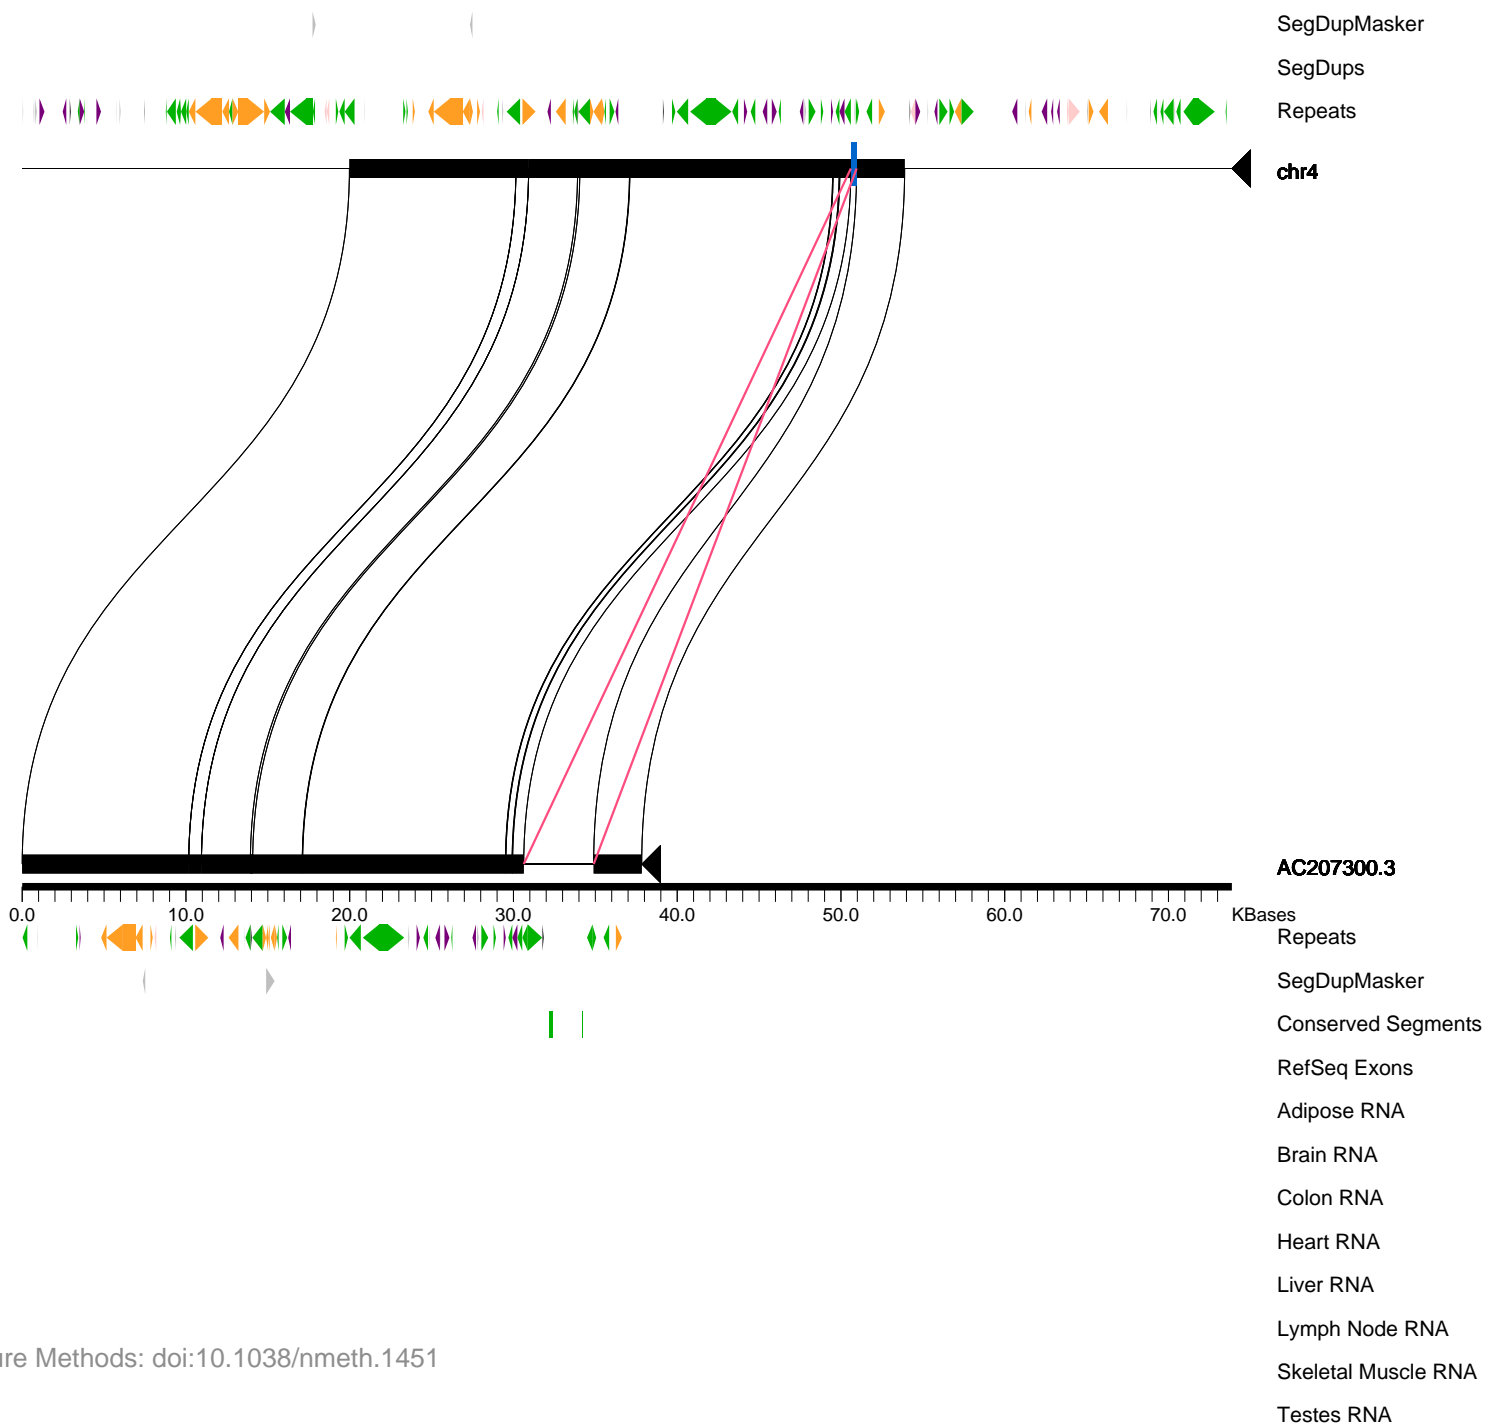

Clone file = AC207366.rc.fa

Insertion Size: 6730

Other Simple Repeat Low Complexity DNA LTR LINE SINE

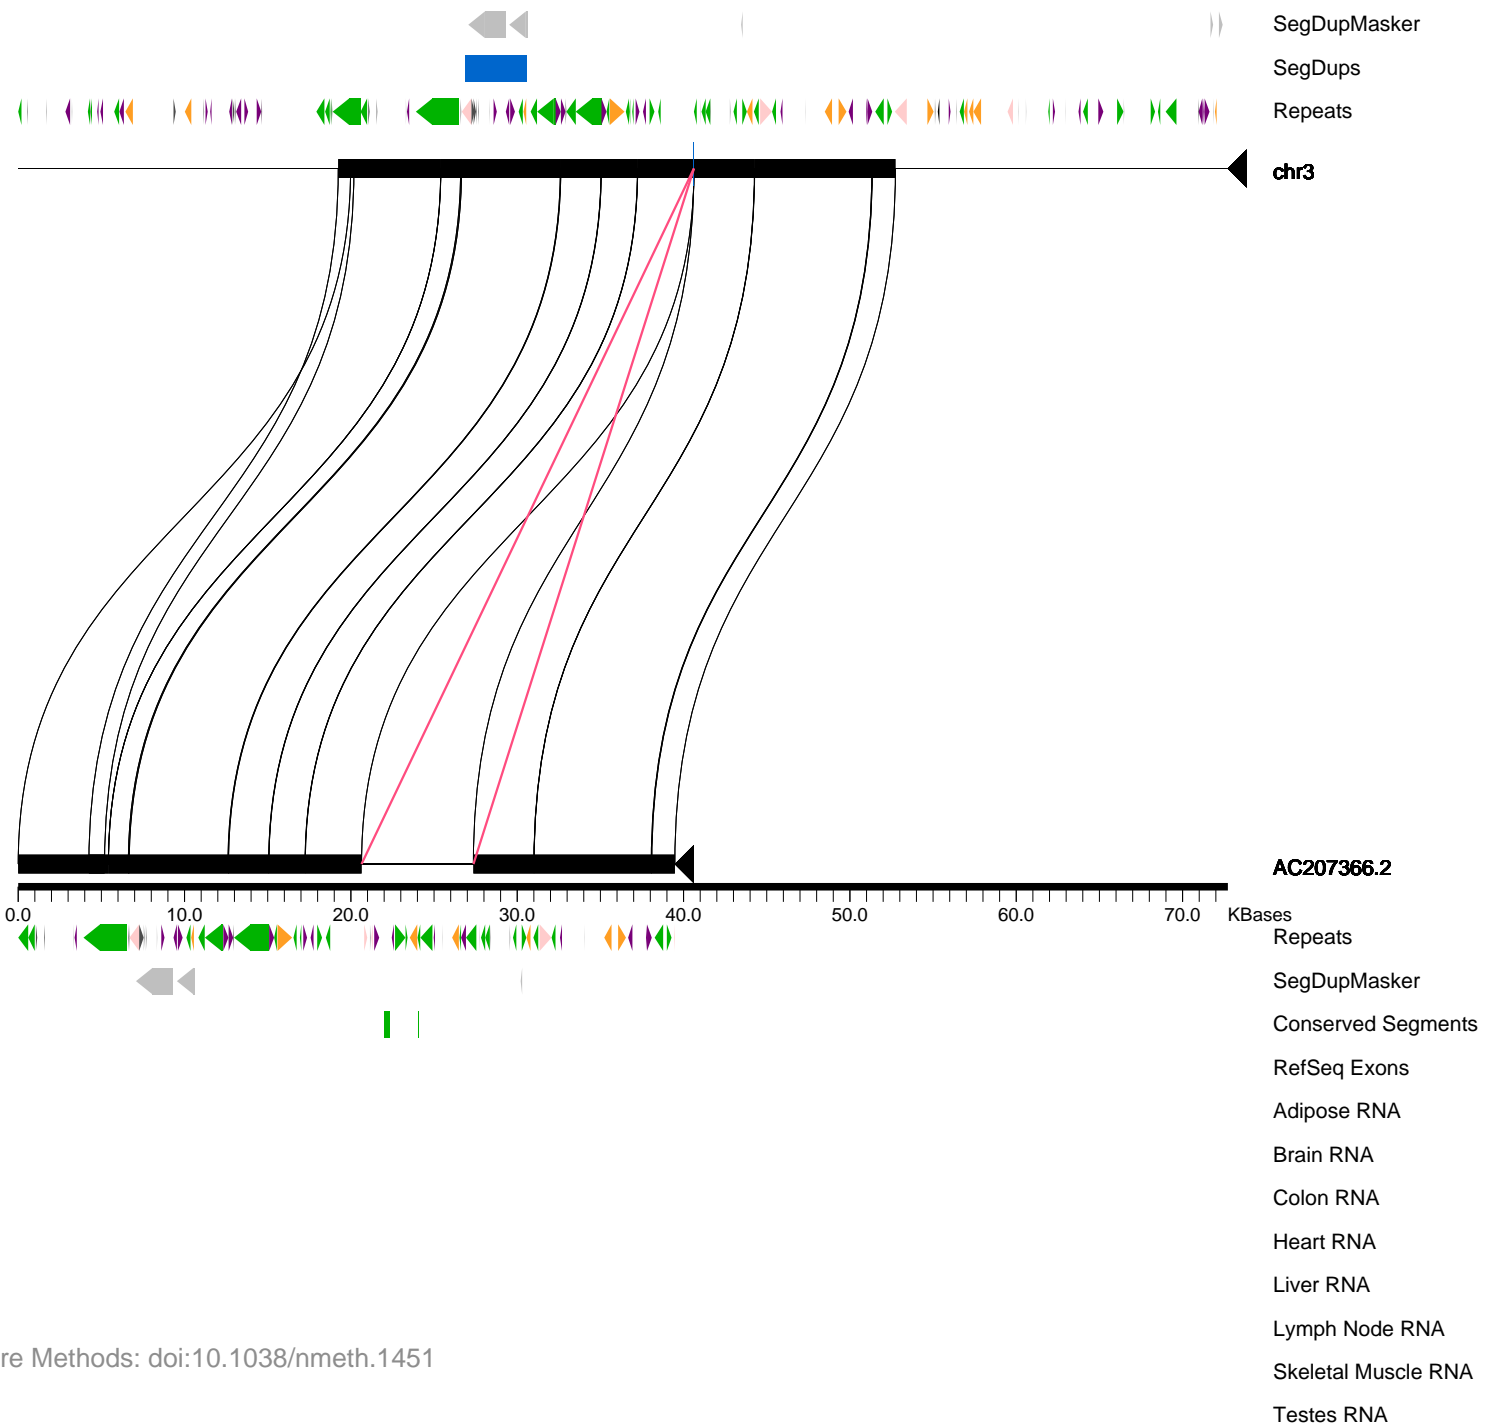

Clone file = AC207442.rc.fa

Insertion Size: 3811

Other Simple Repeat Low Complexity DNA LTR LINE SINE

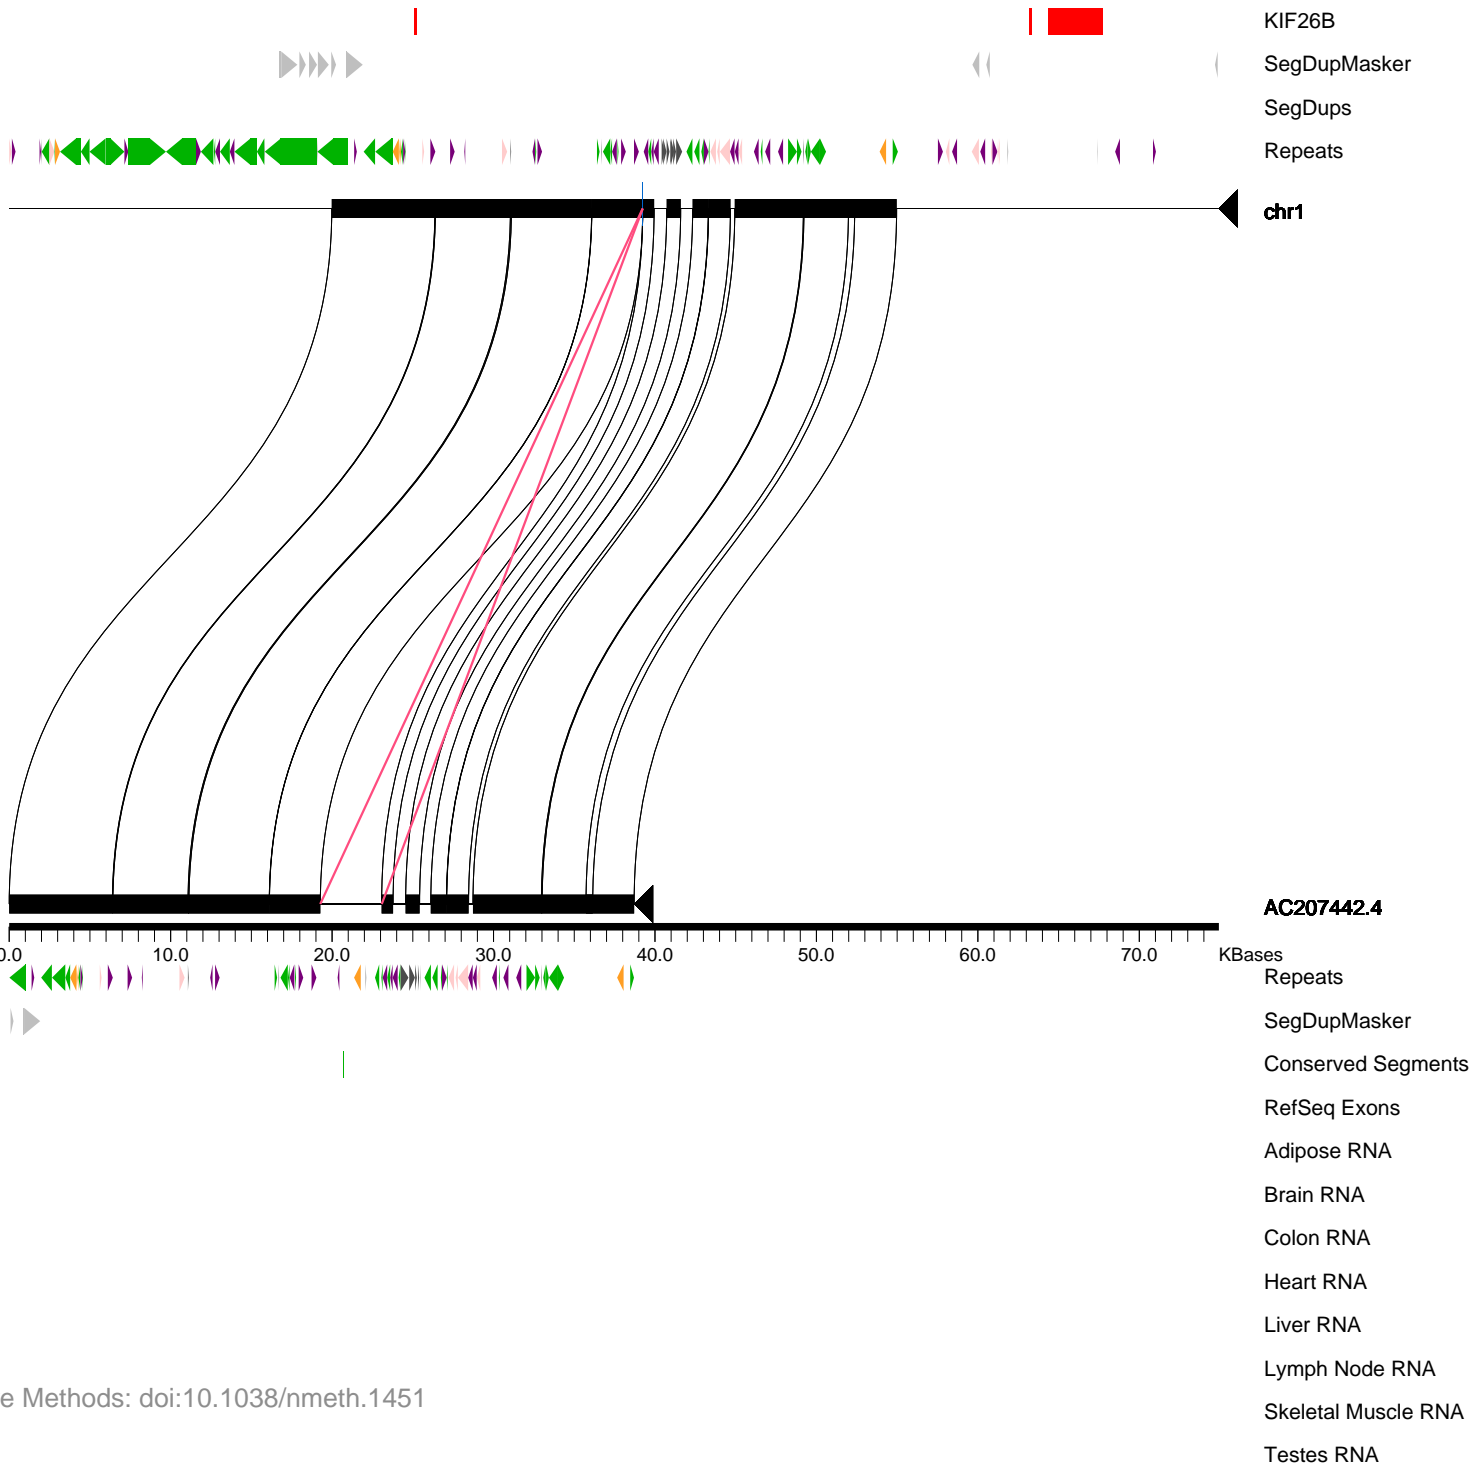

Clone file = AC207588.rc.fa

Insertion Size: 4860

Other Simple Repeat Low Complexity DNA LTR LINE SINE

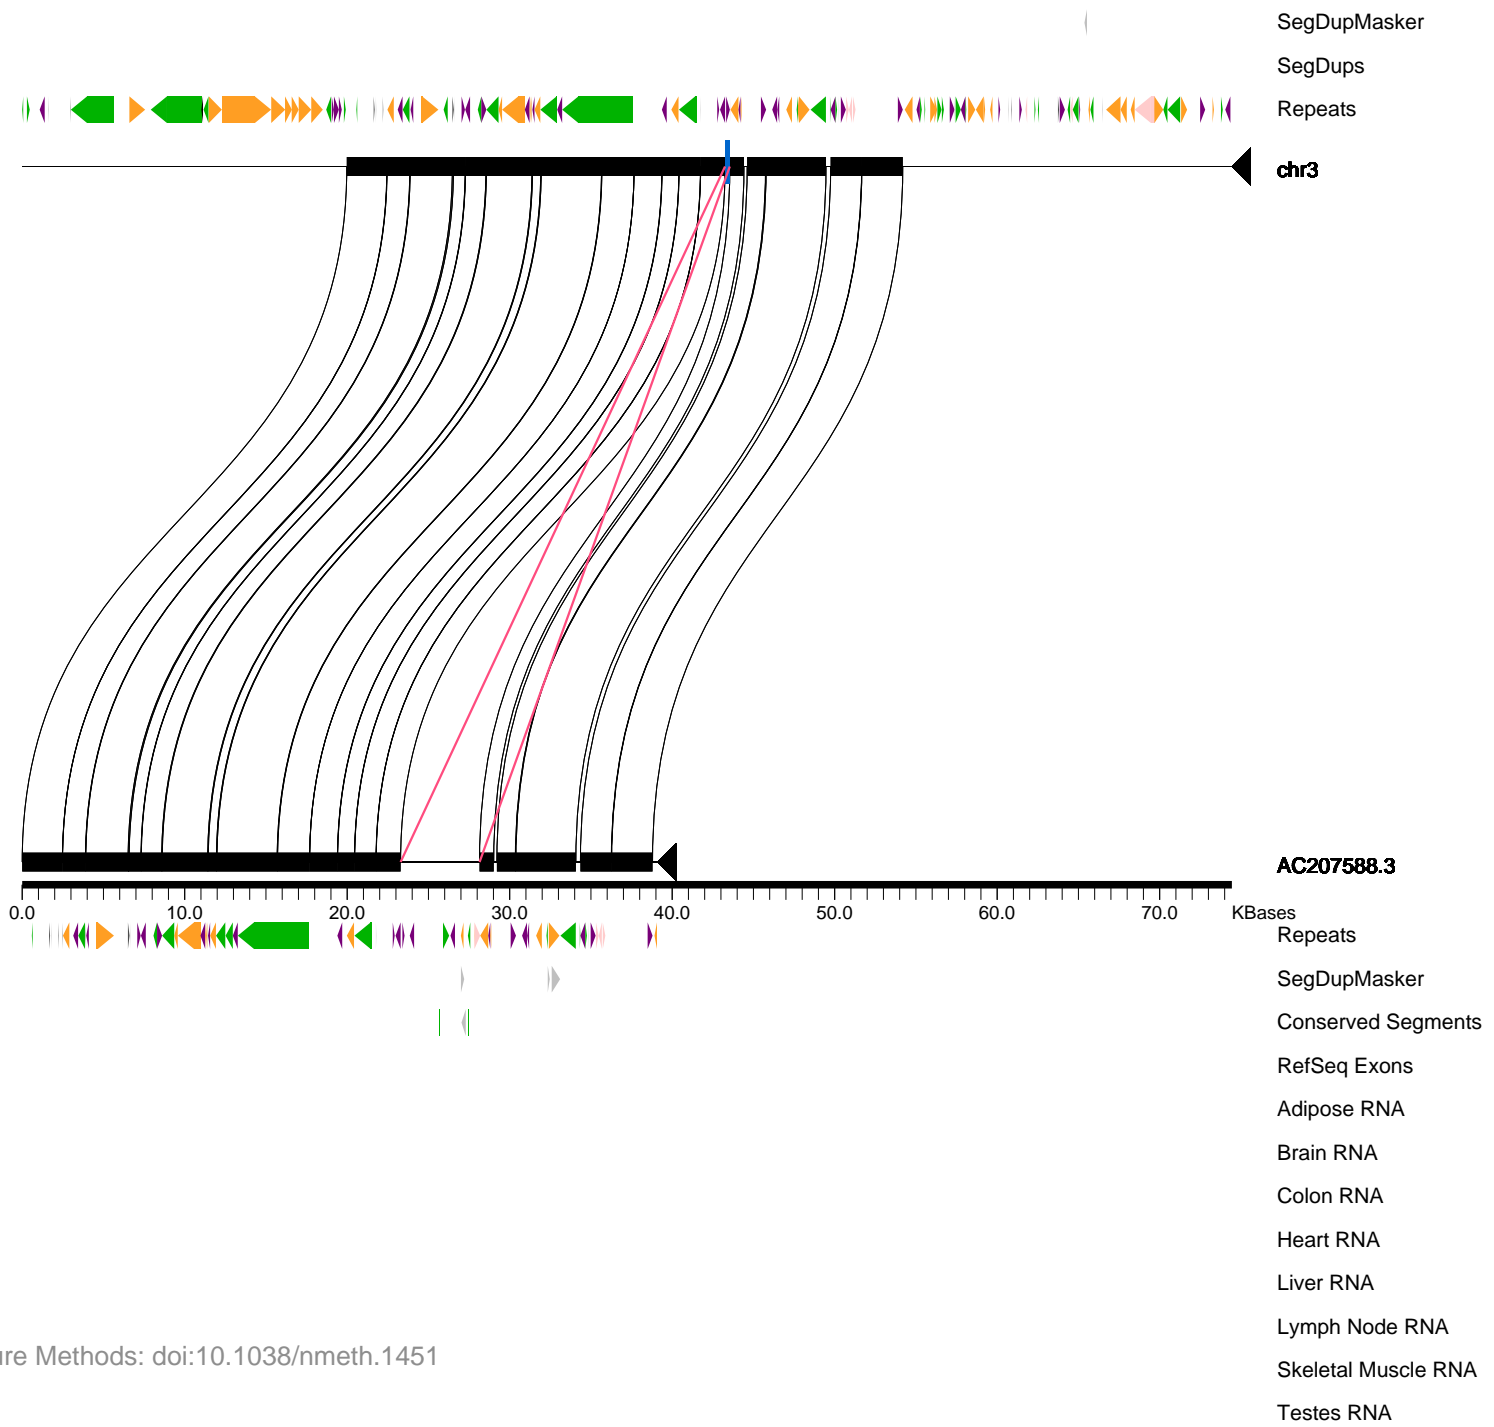

Clone file = AC207607.fa

Insertion Size: 5739

Other Simple Repeat Low Complexity DNA LTR LINE SINE

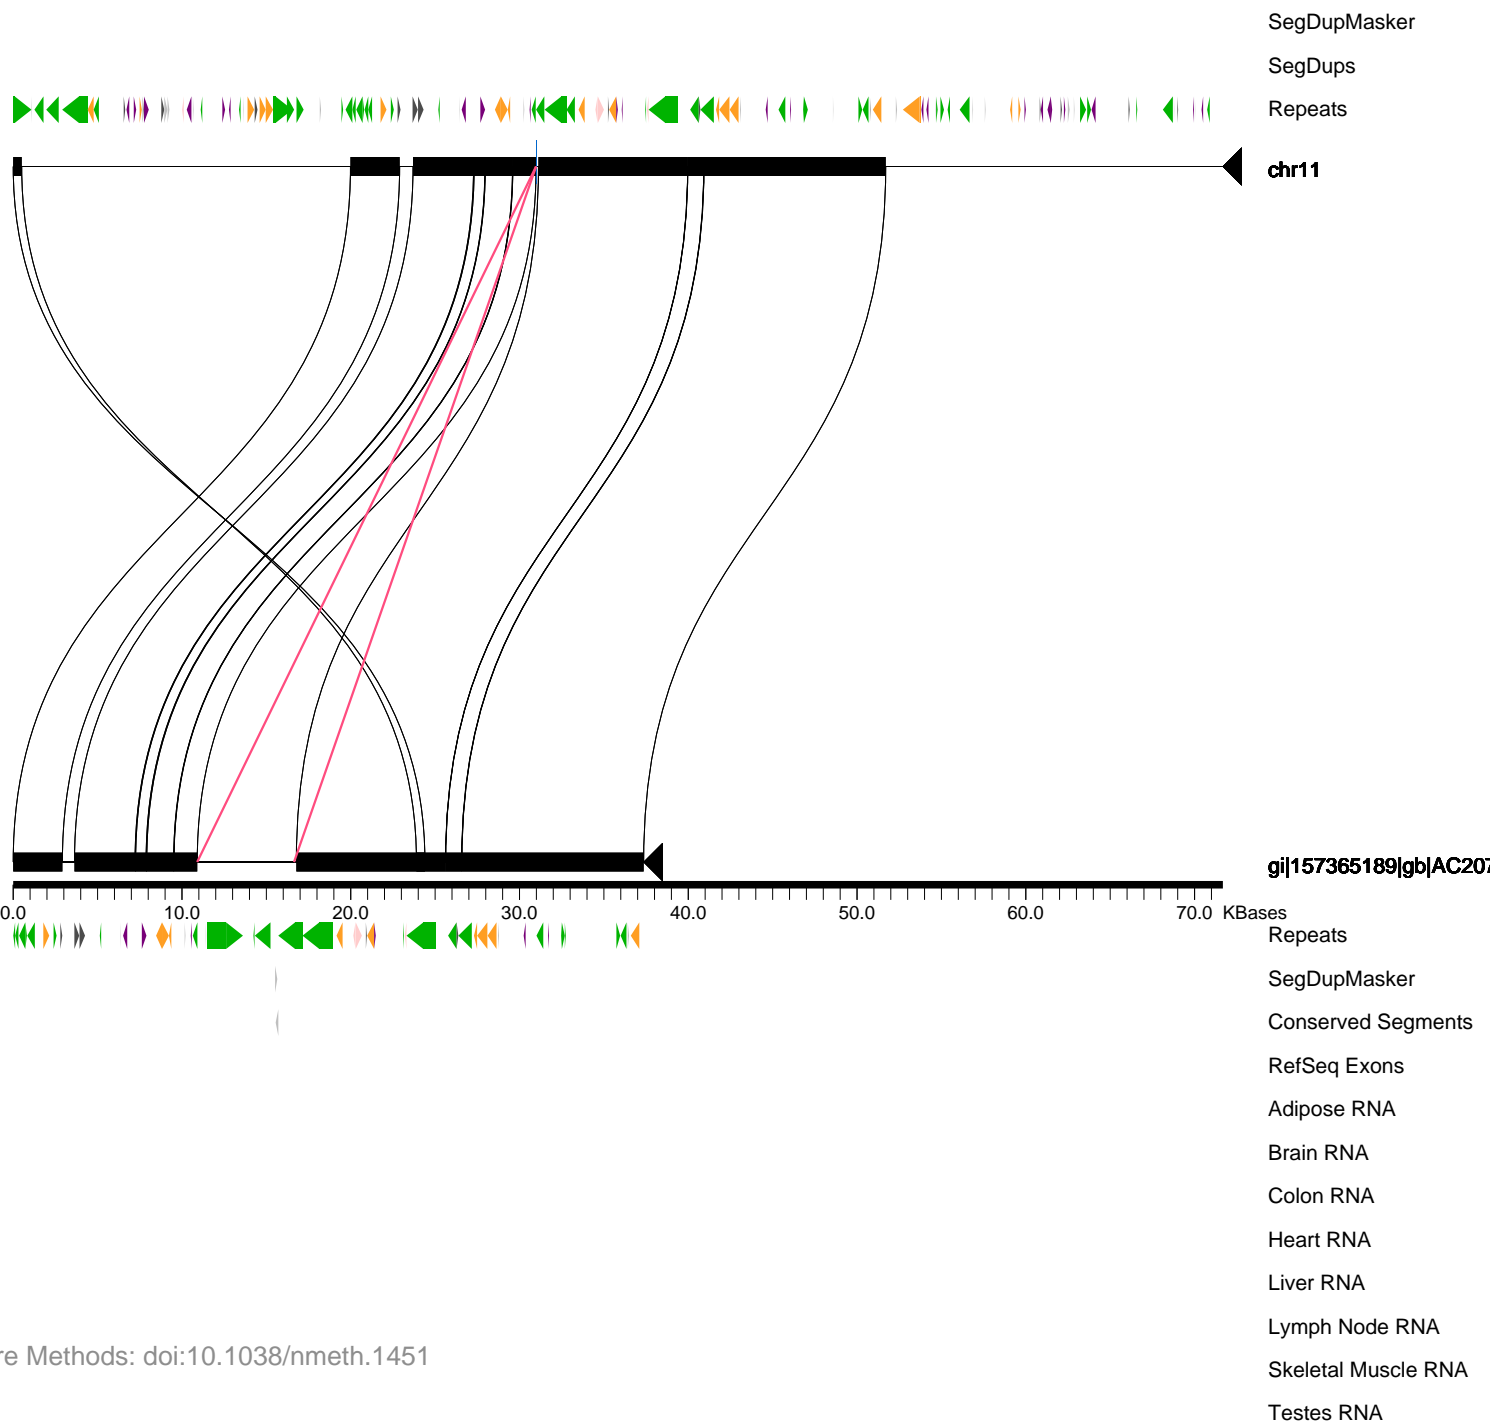



Clone file = AC207611.fa

Insertion Size: 3133

Other Simple Repeat Low Complexity DNA LTR LINE SINE

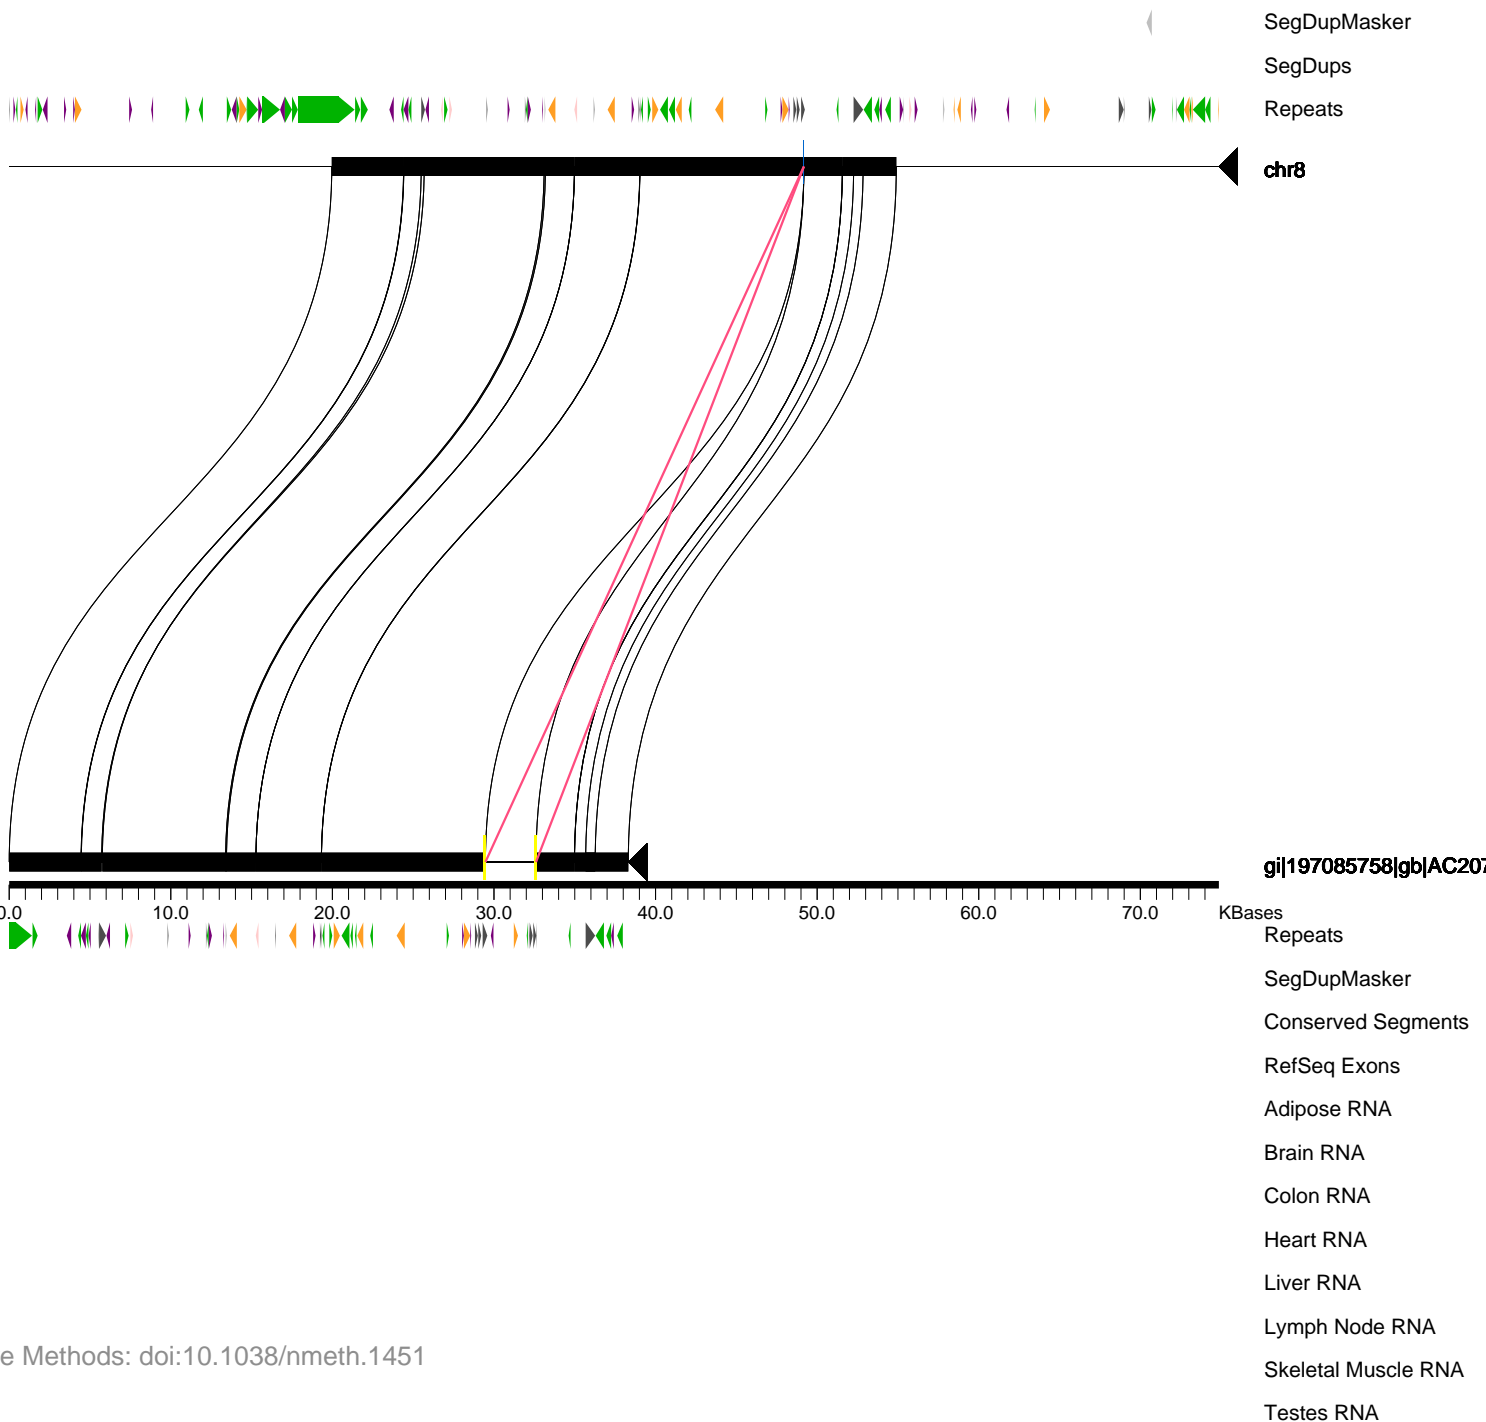

Clone file = AC207713.rc.fa

Insertion Size: 2571

Other Simple Repeat Low Complexity DNA LTR LINE SINE

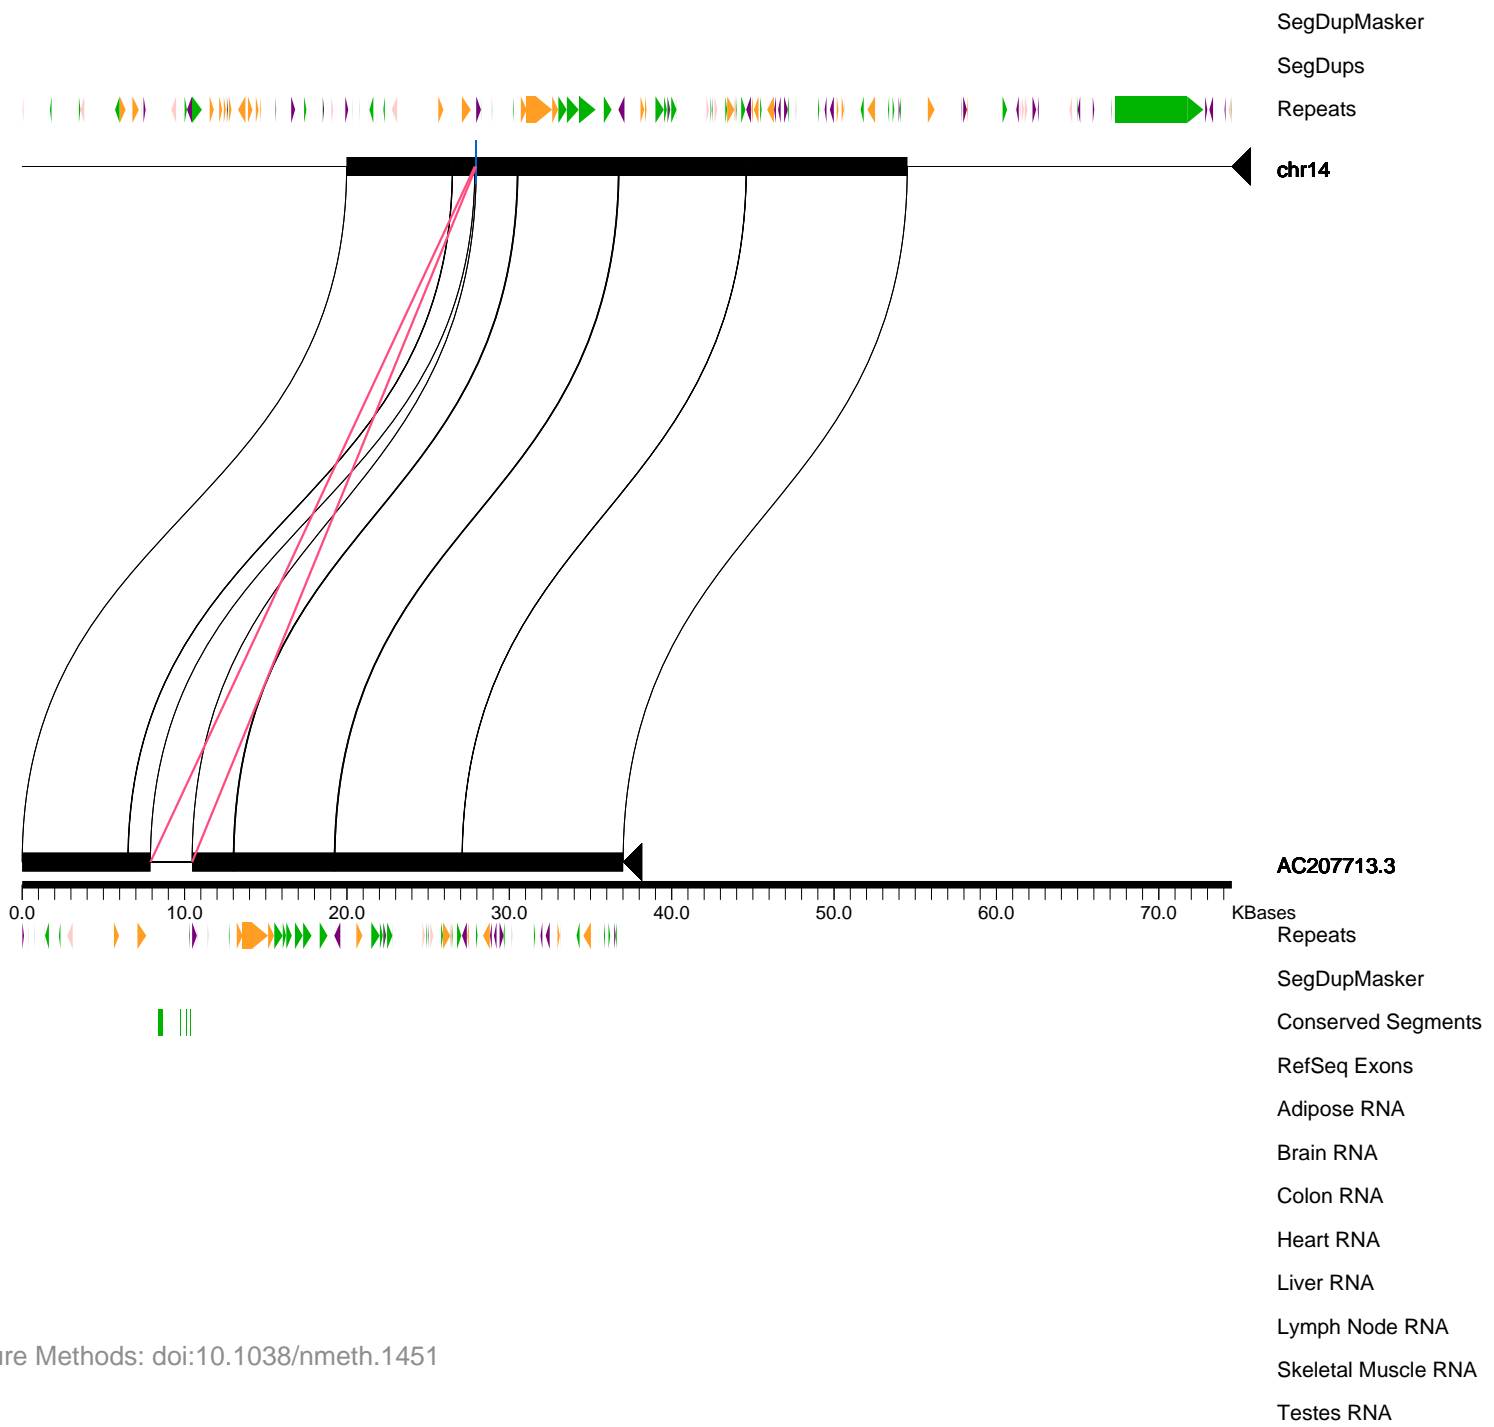

Clone file = AC207777.fa

Insertion Size: 3173

Other Simple Repeat Low Complexity DNA LTR LINE SINE

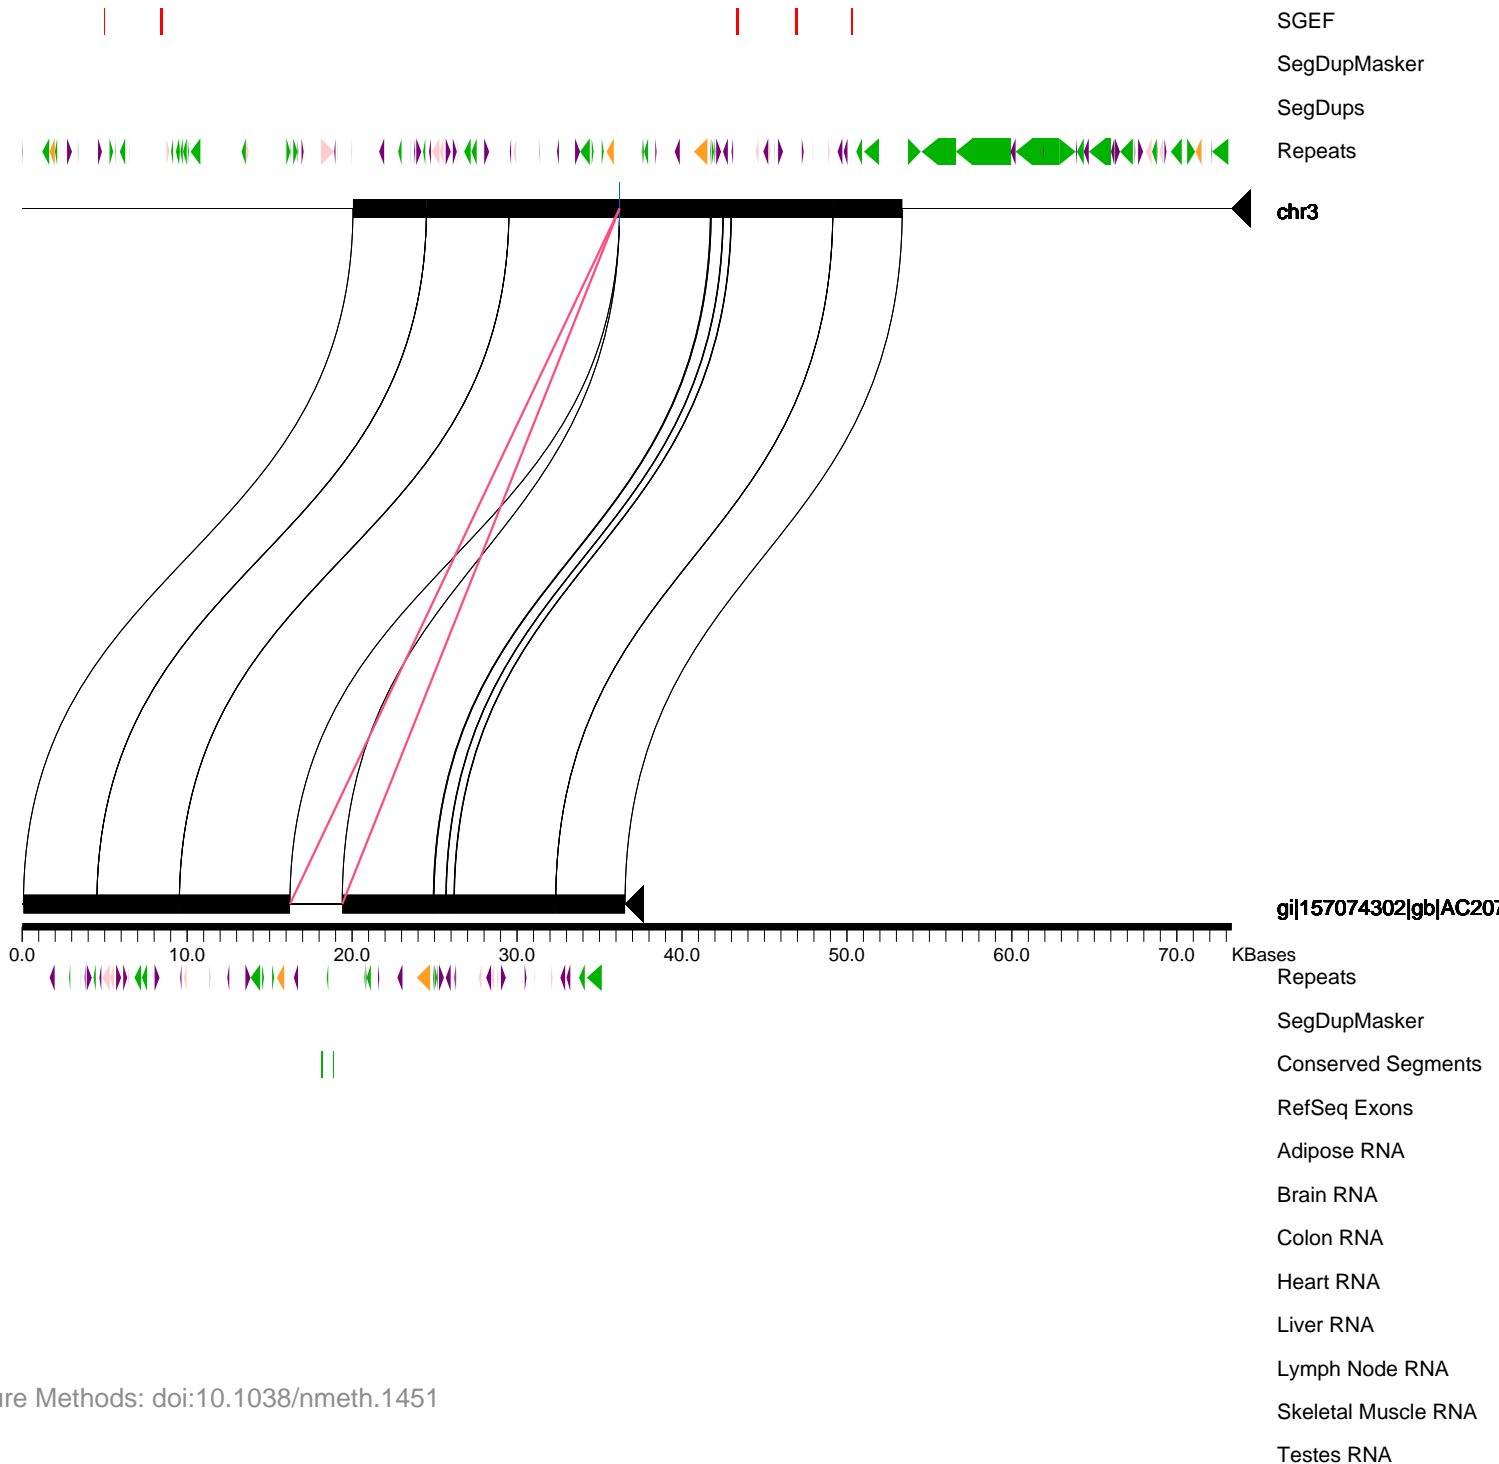

Clone file = AC207981.rc.fa

Insertion Size: 9557

Other Simple Repeat Low Complexity DNA LTR LINE SINE

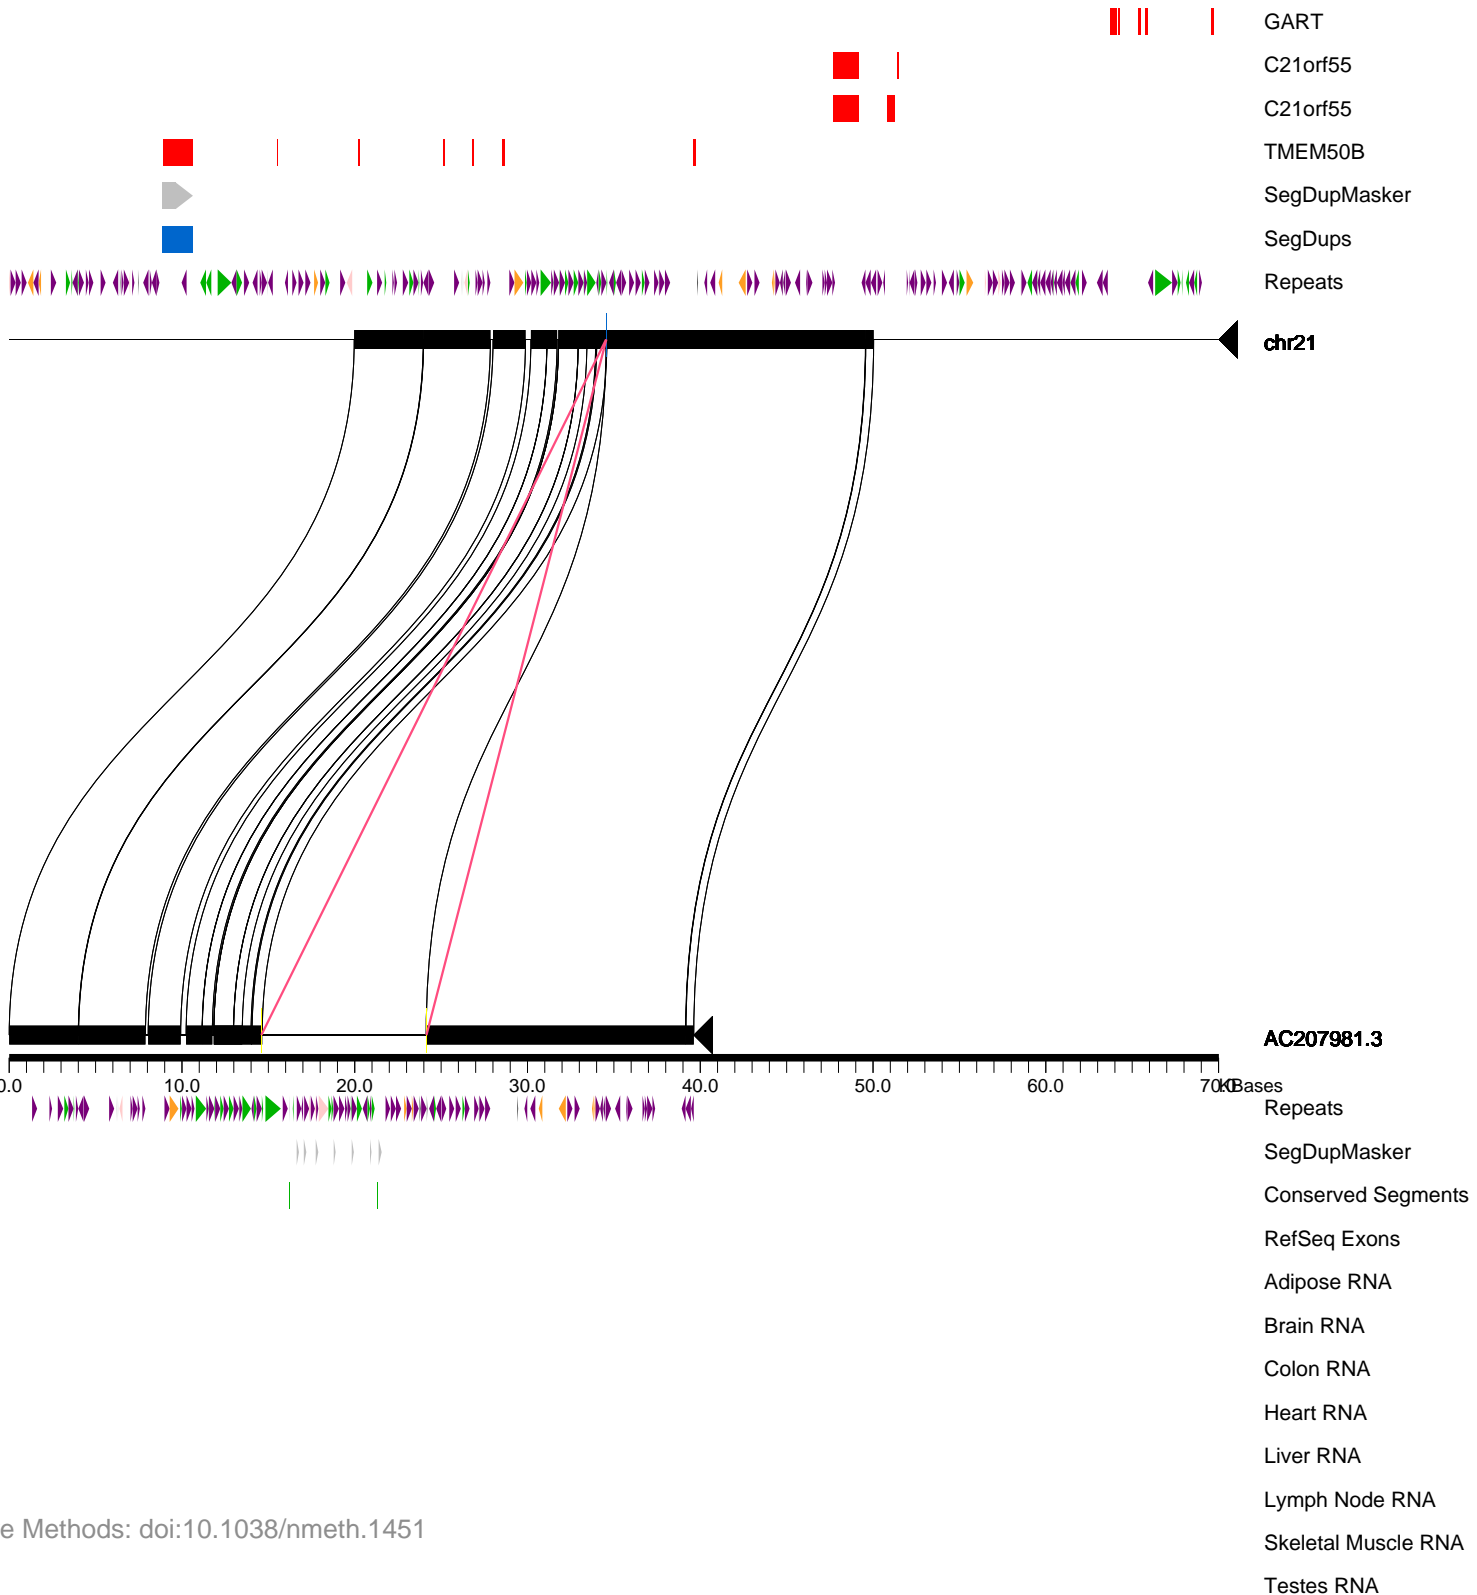

Clone file = AC207999.fa

Insertion Size: 4006

Other Simple Repeat Low Complexity DNA LTR LINE SINE

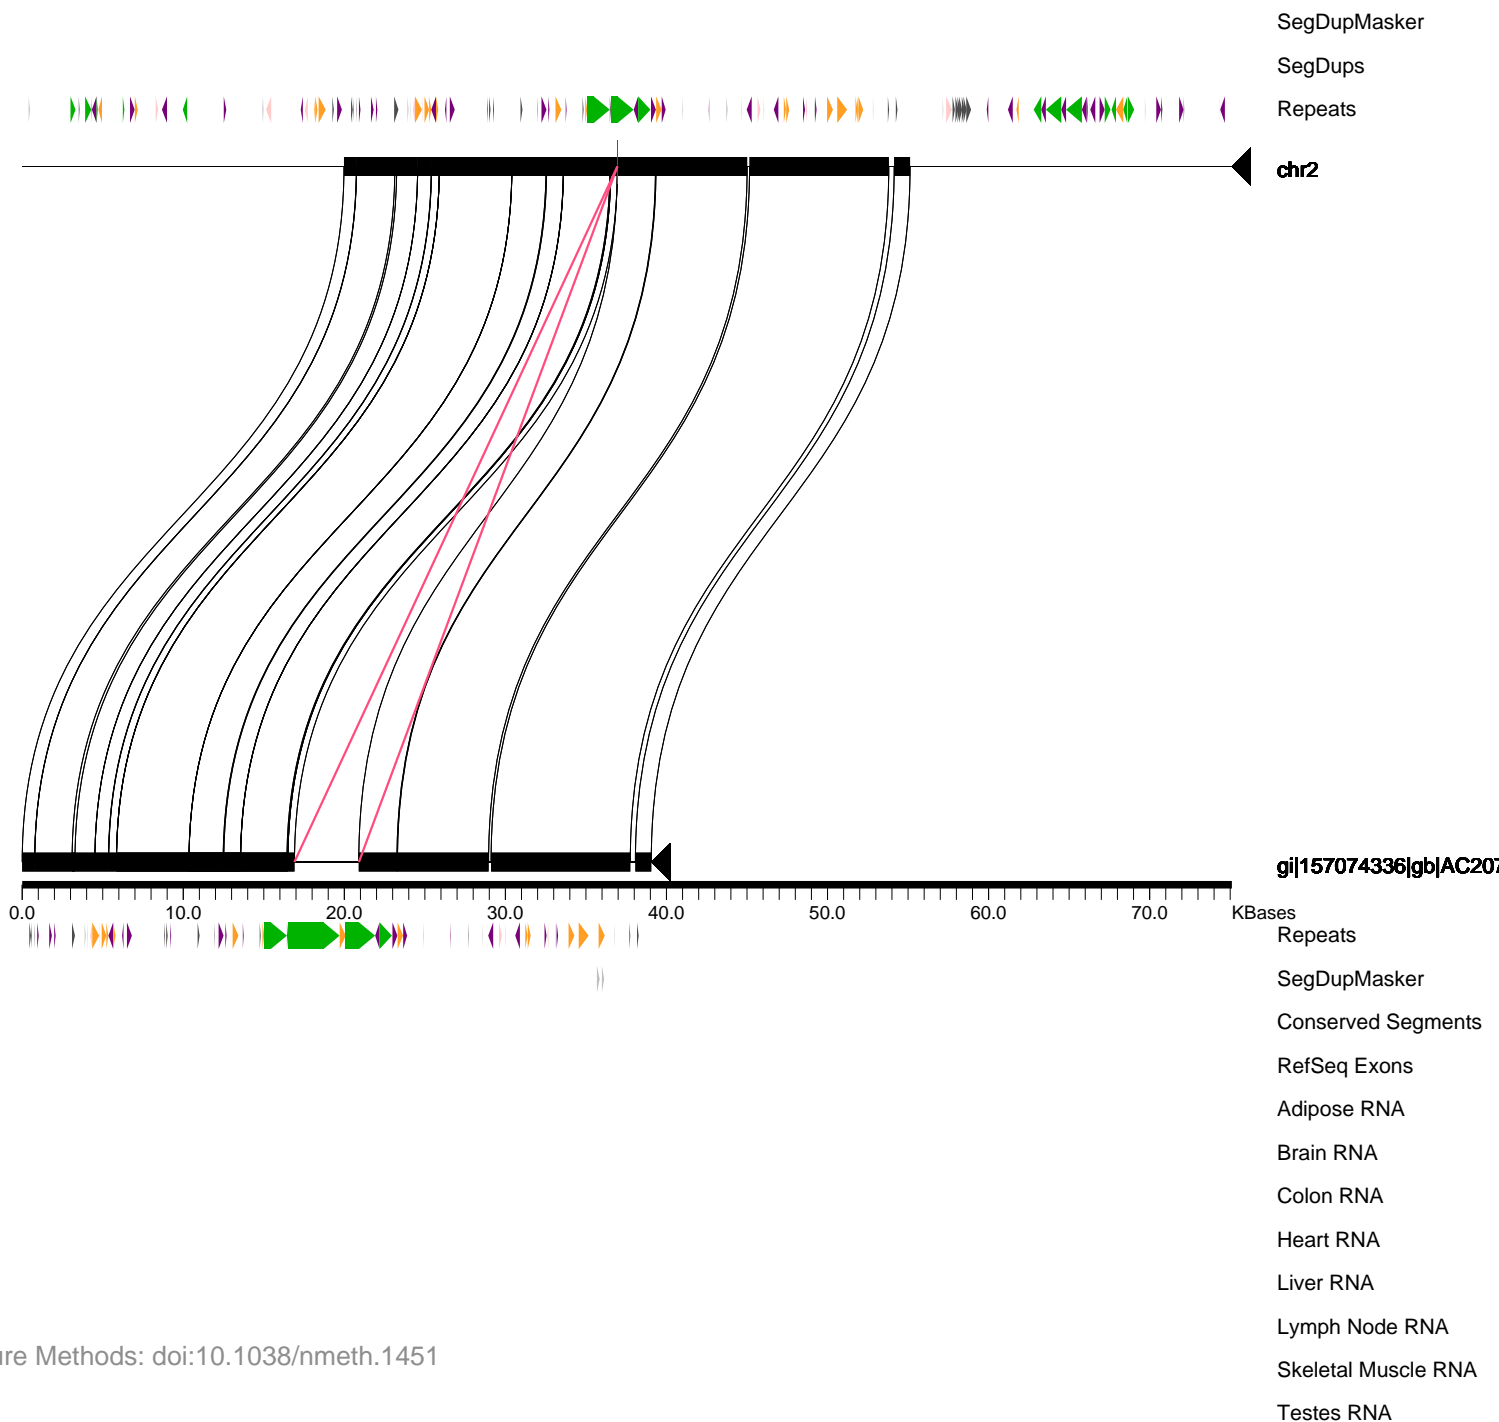

Clone file = AC208009.fa

Insertion Size: 5157

Other Simple Repeat Low Complexity DNA LTR LINE SINE

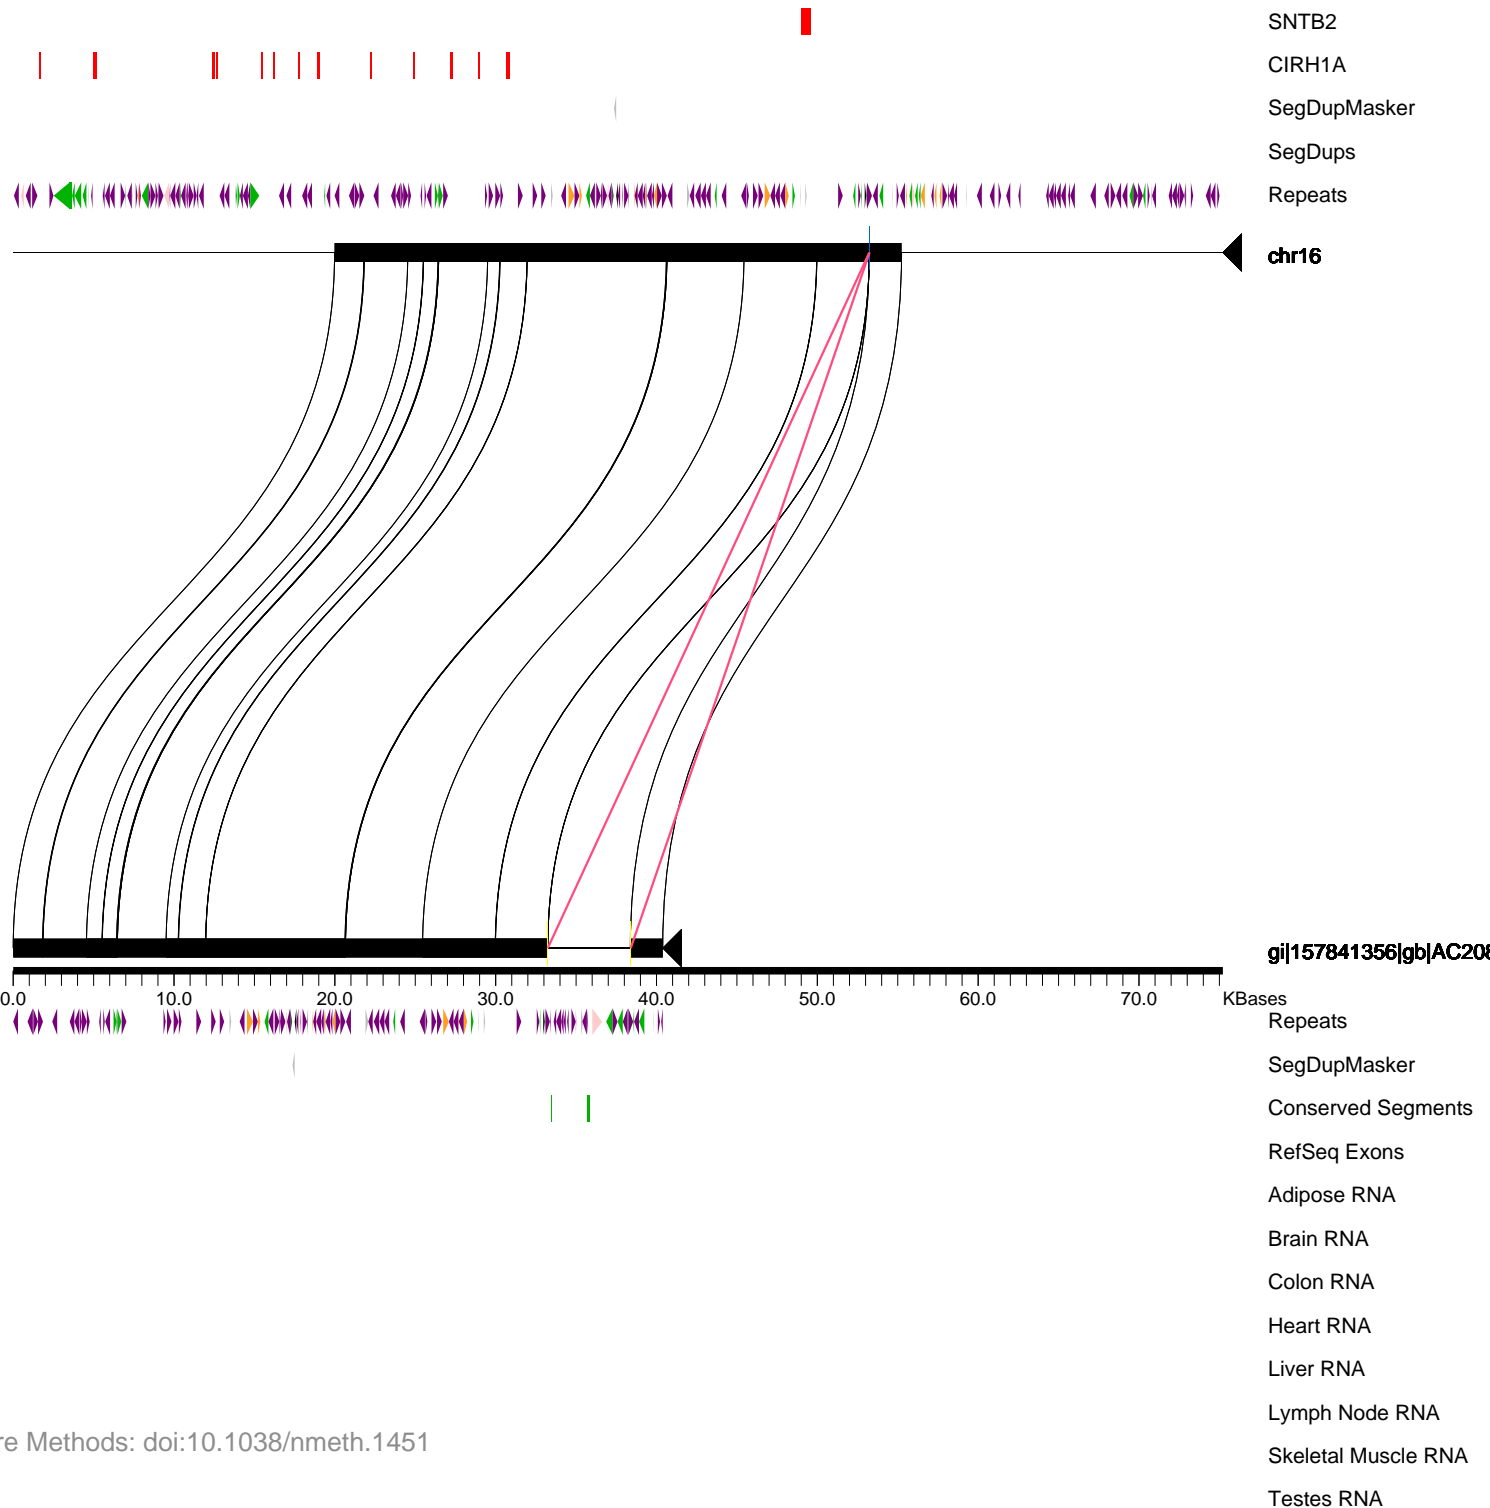

Clone file = AC208056.rc.fa

Insertion Size: 1953

Other Simple Repeat Low Complexity DNA LTR LINE SINE

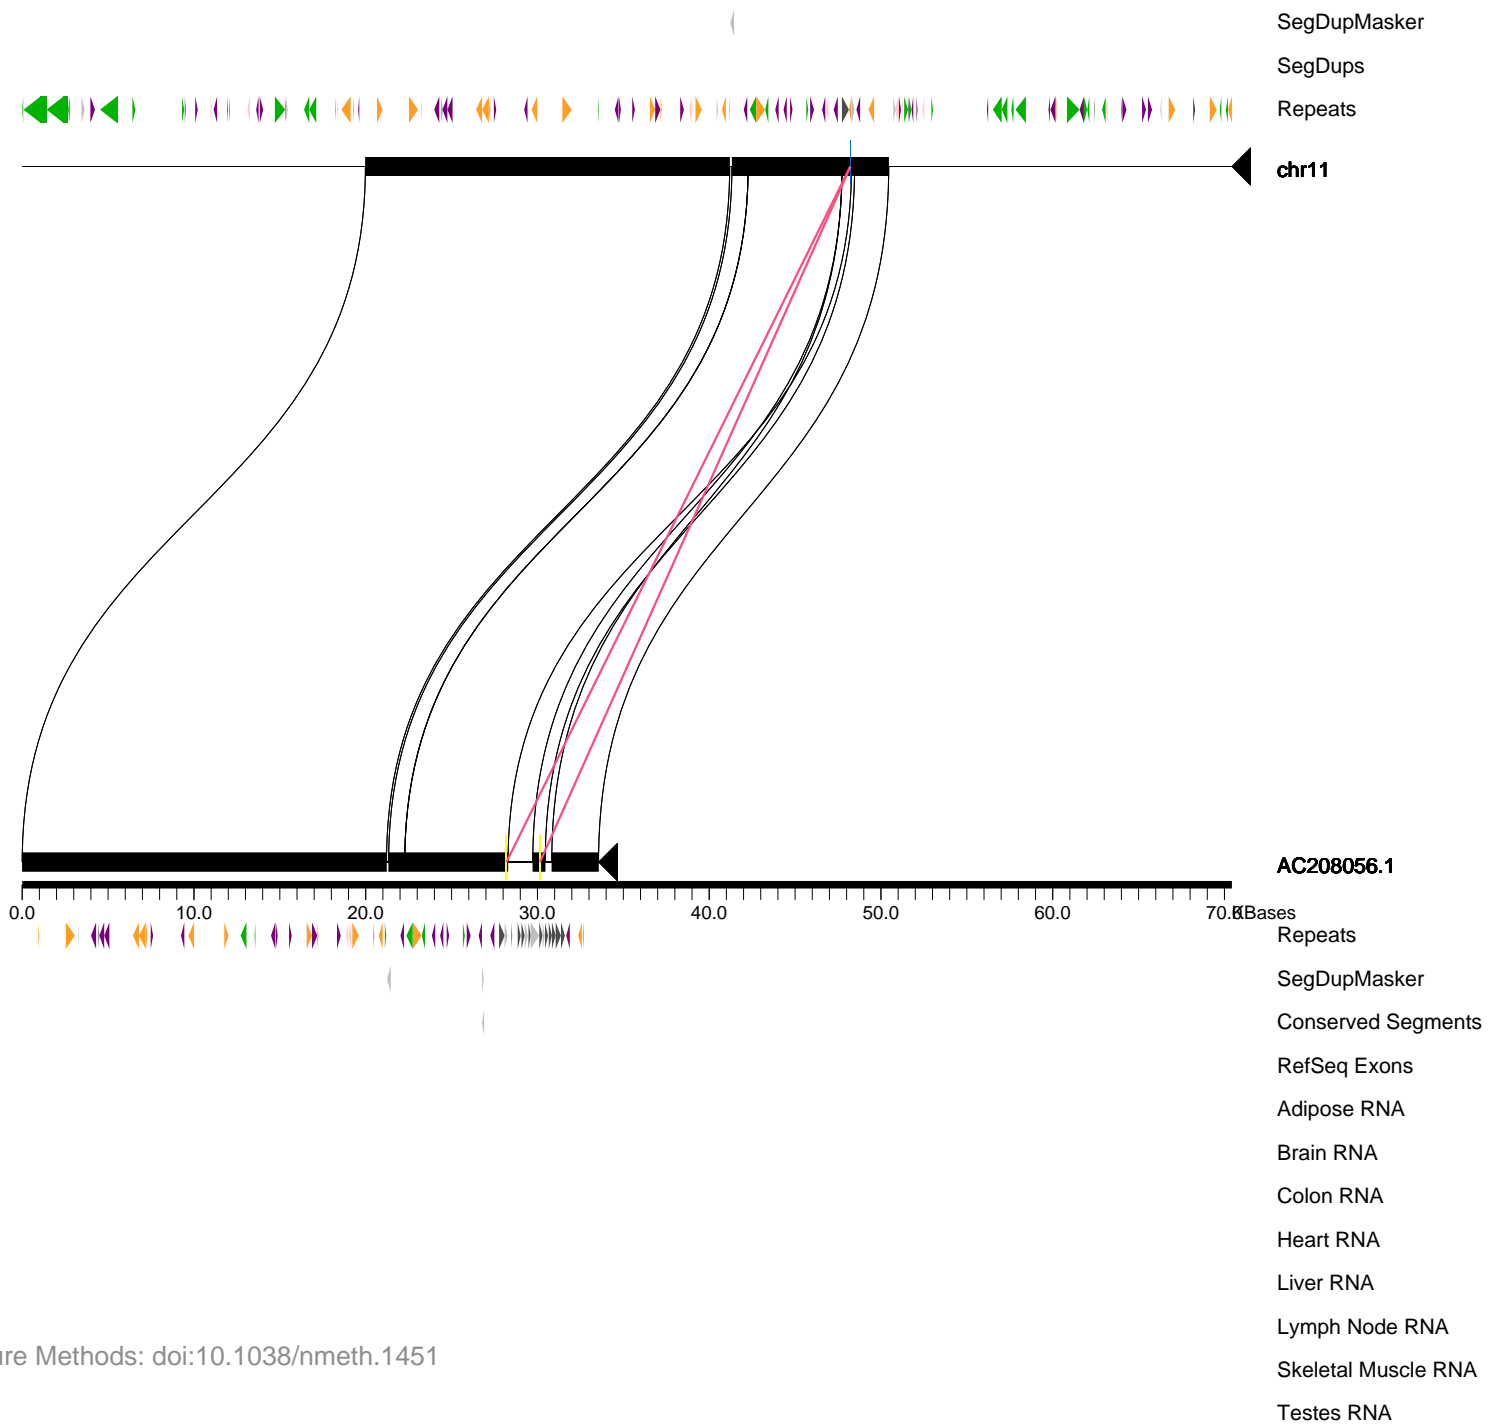

Clone file = AC208058.fa

Insertion Size: 5405

Other Simple Repeat Low Complexity DNA LTR LINE SINE

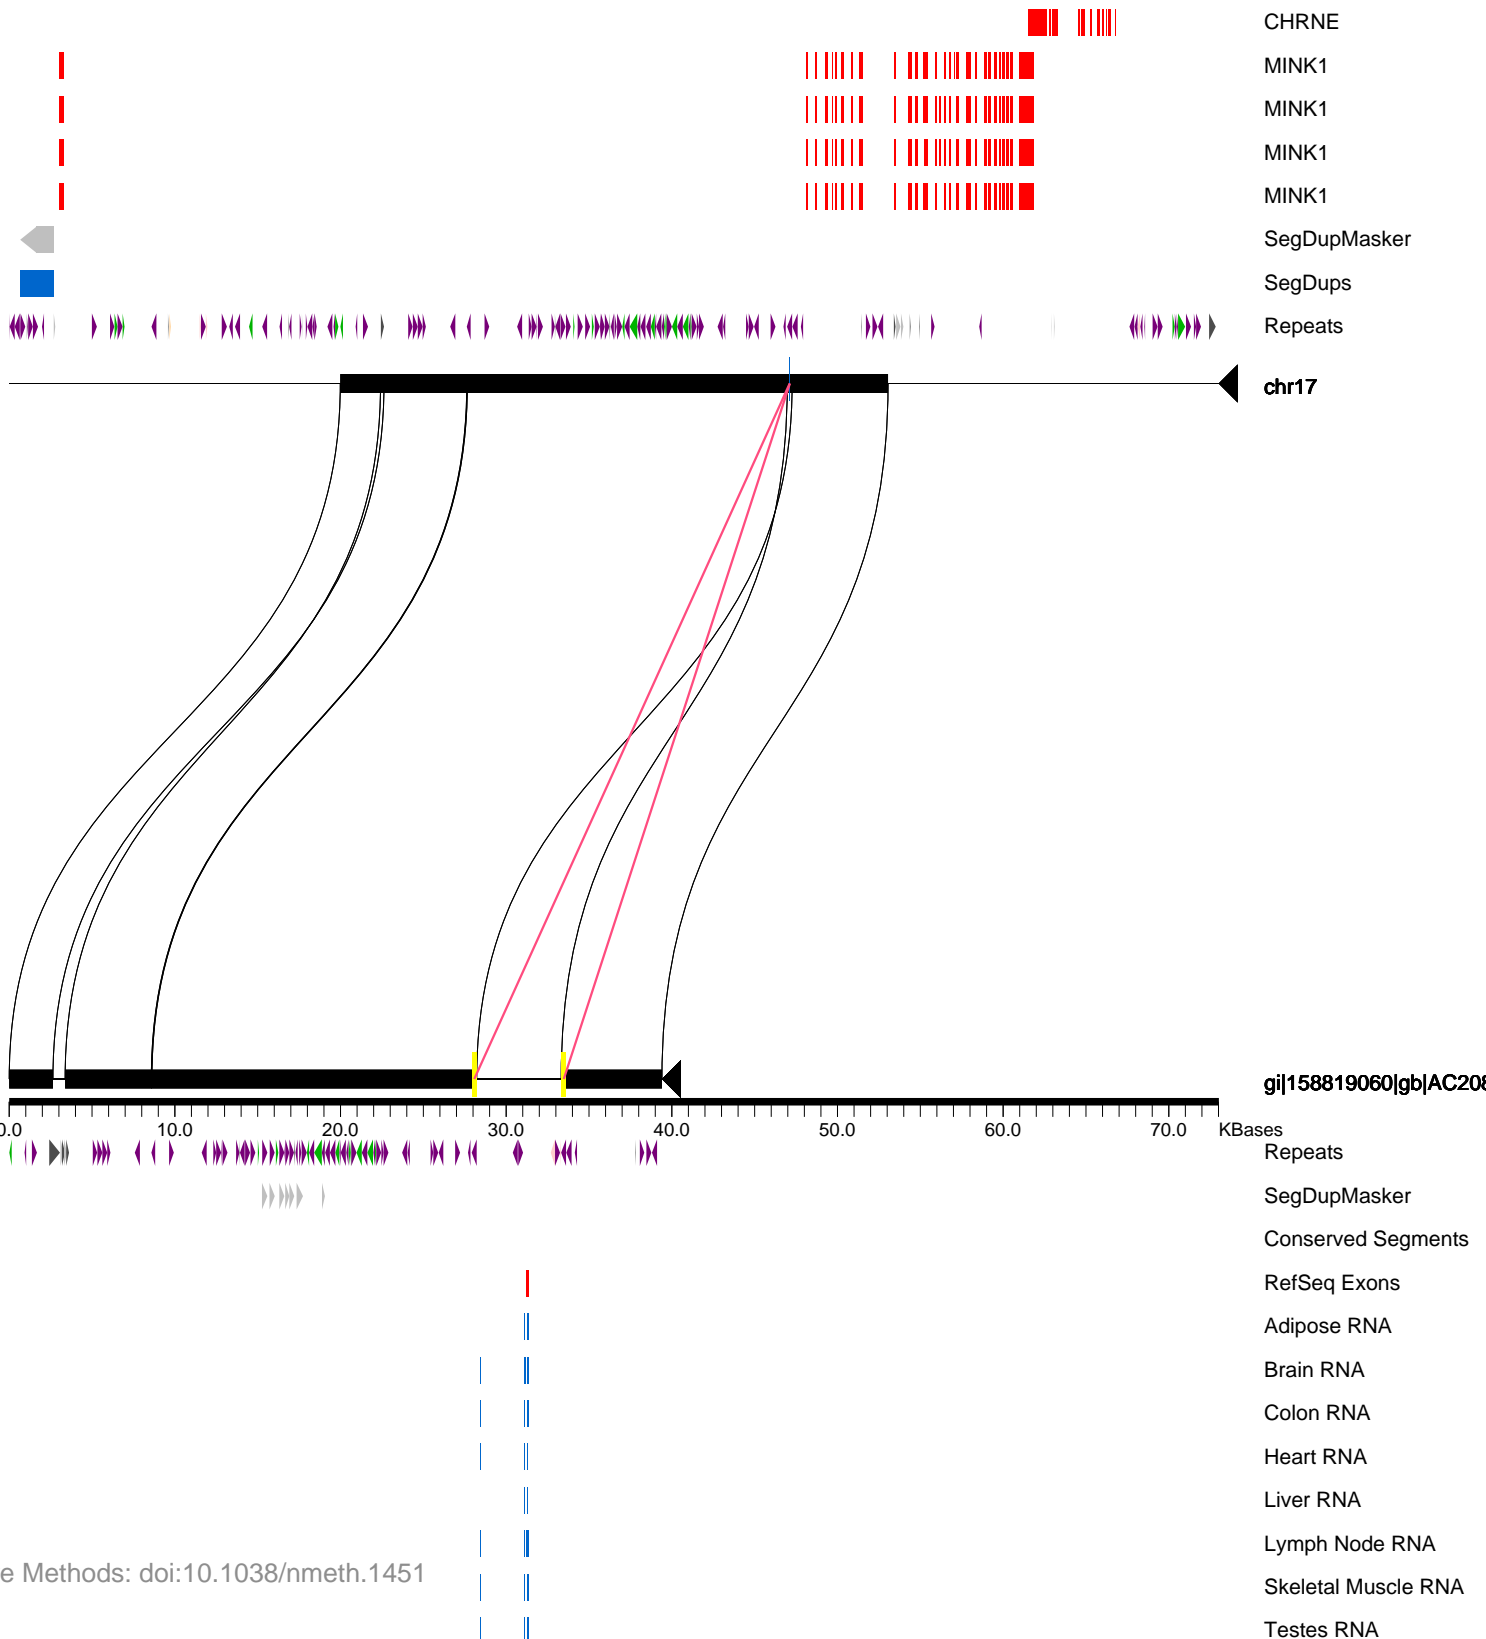



Clone file = AC208064.rc.fa

Insertion Size: 7131

Other Simple Repeat Low Complexity DNA LTR LINE SINE

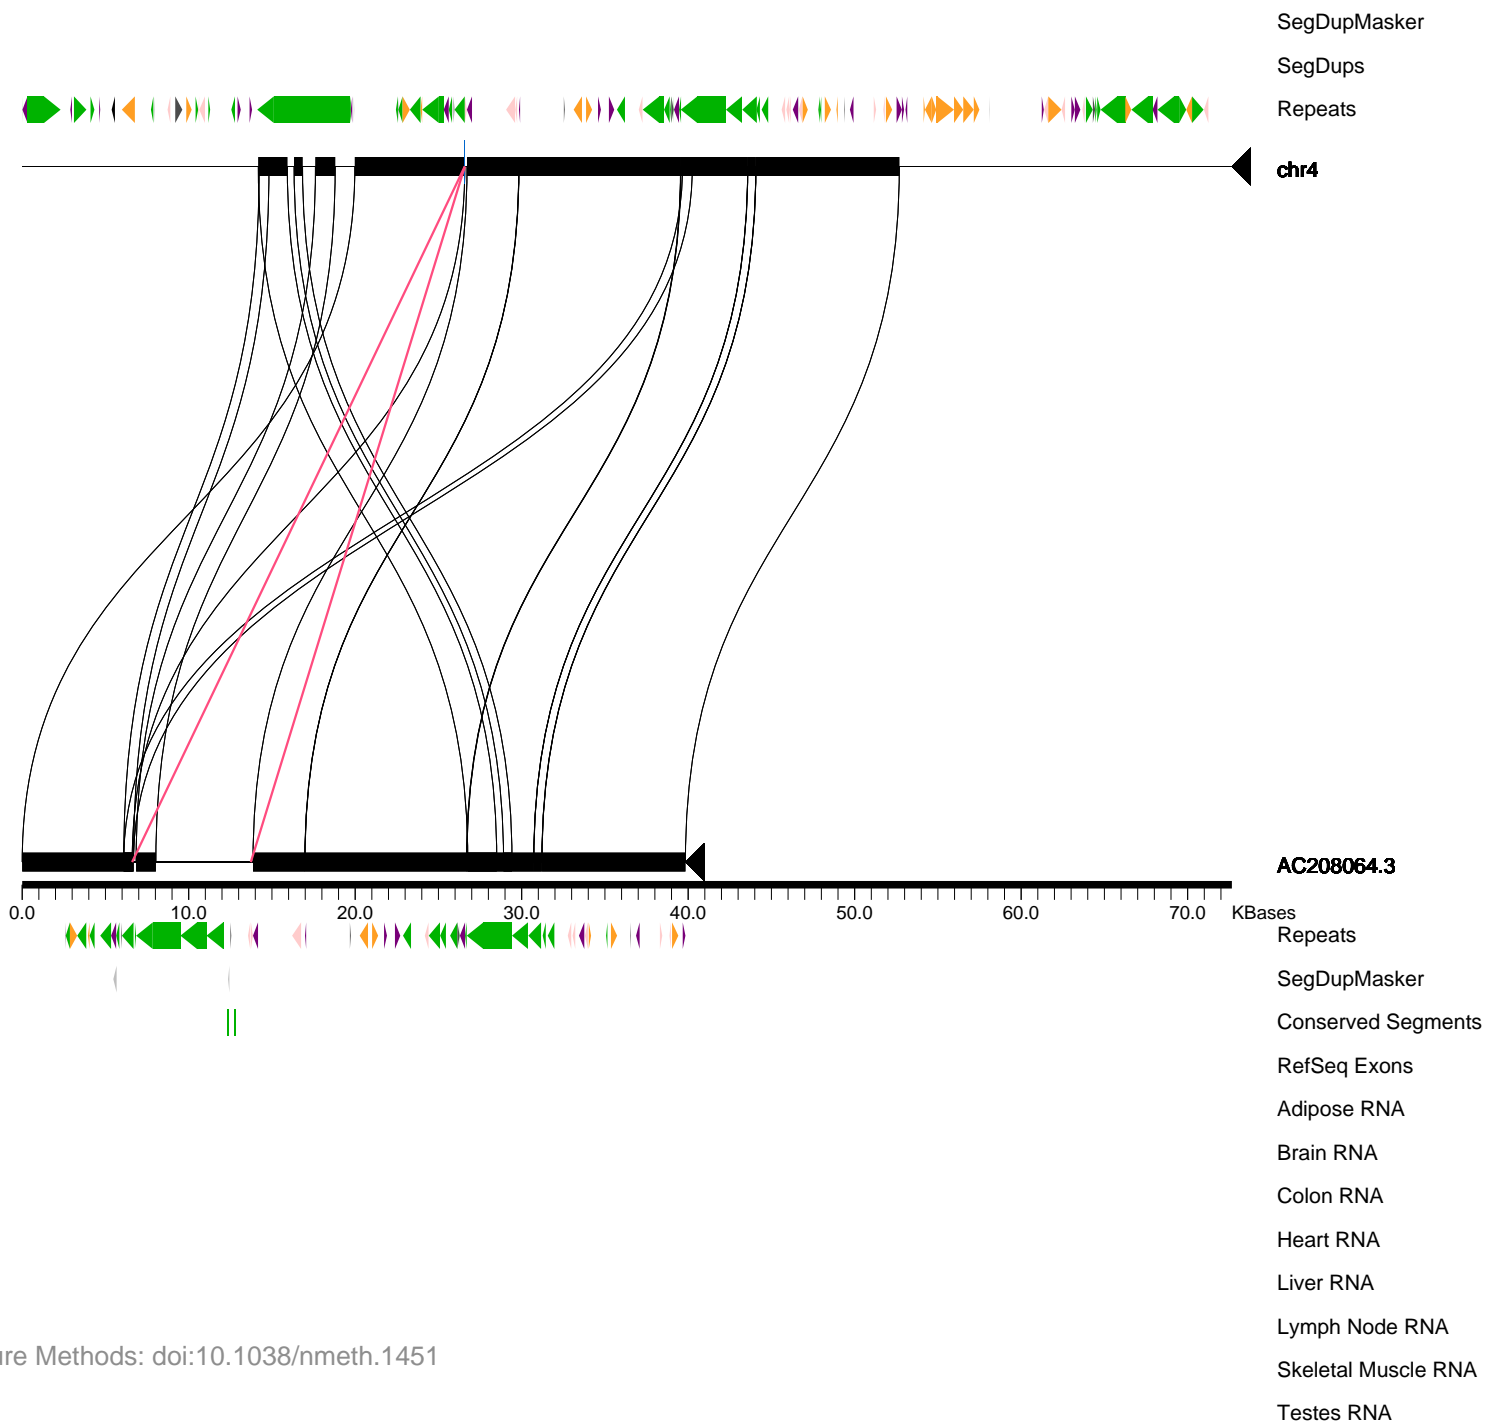

Clone file = AC208066.rc.fa

Insertion Size: 4881

Other Simple Repeat Low Complexity DNA LTR LINE SINE

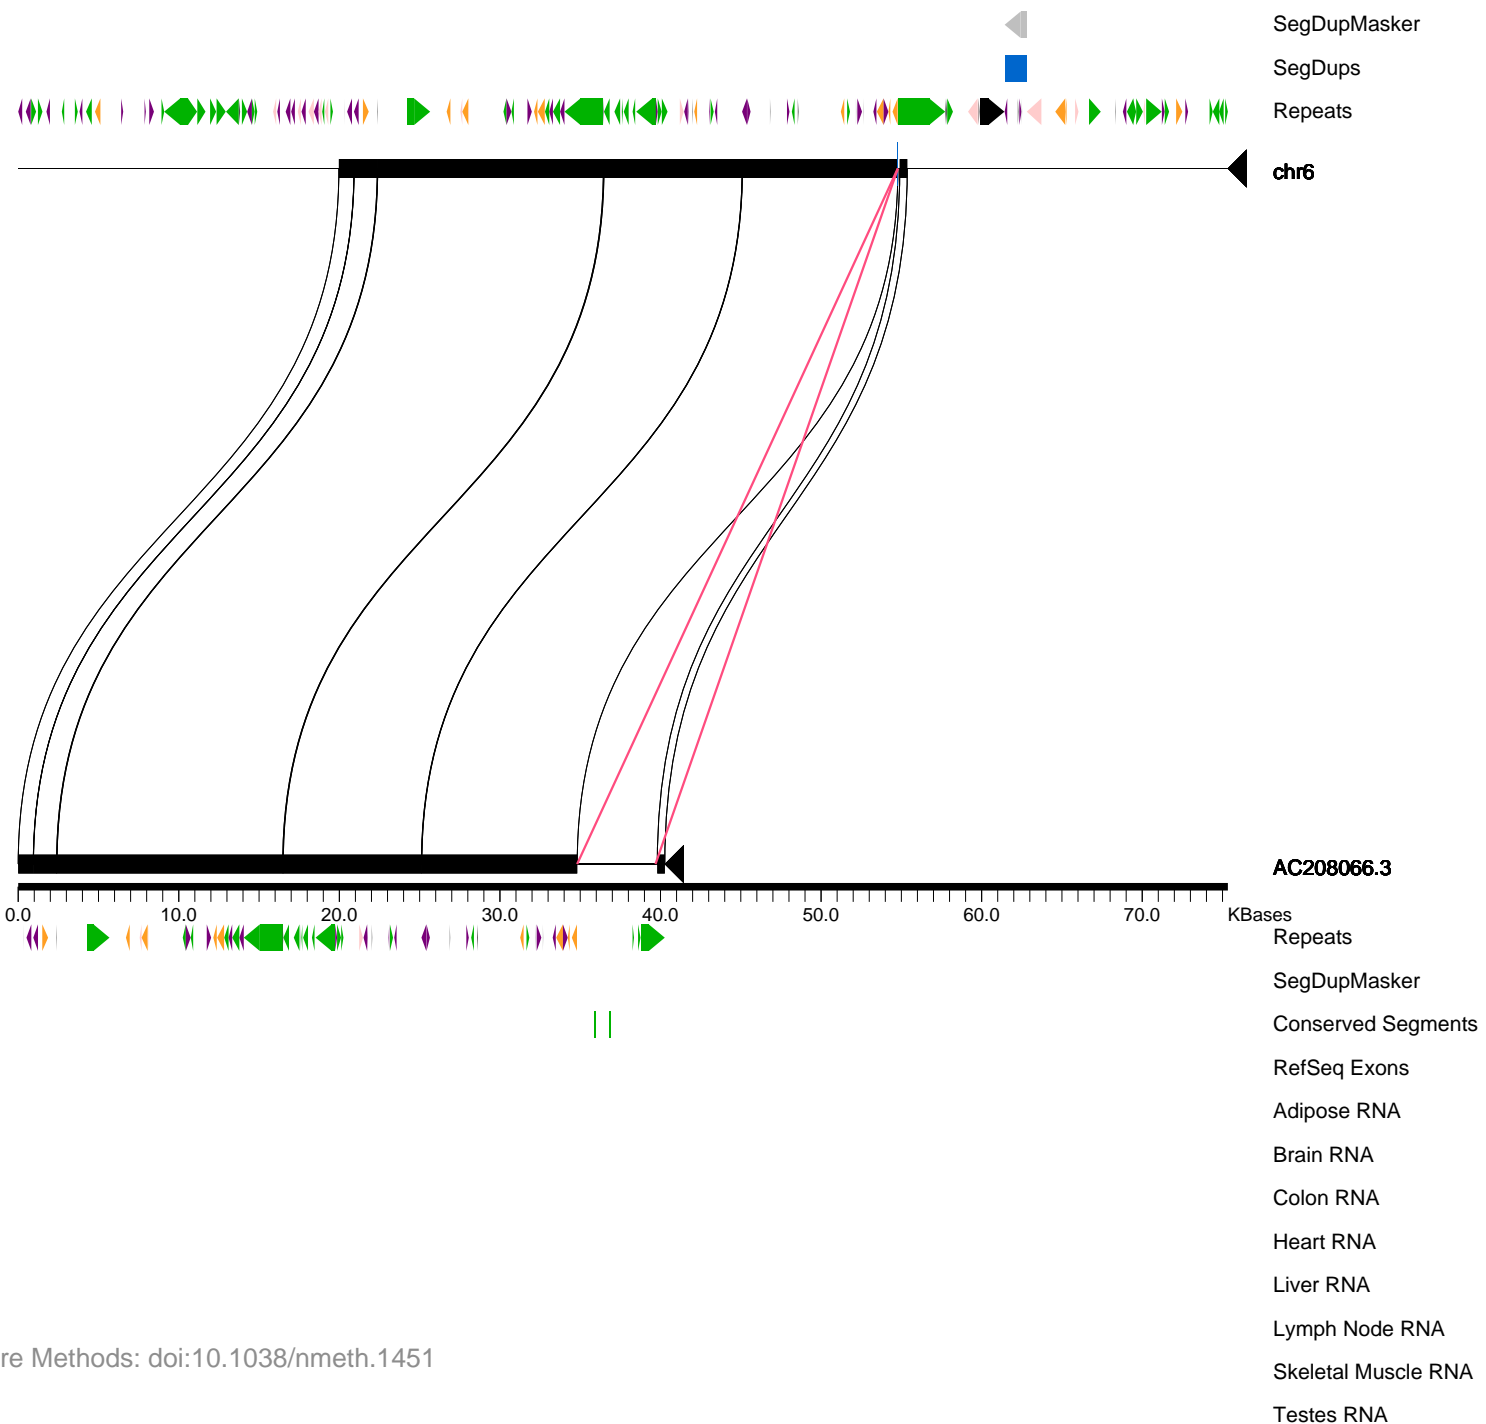

Clone file = AC208069.fa

Insertion Size: 106

Other Simple Repeat Low Complexity DNA LTR LINE SINE

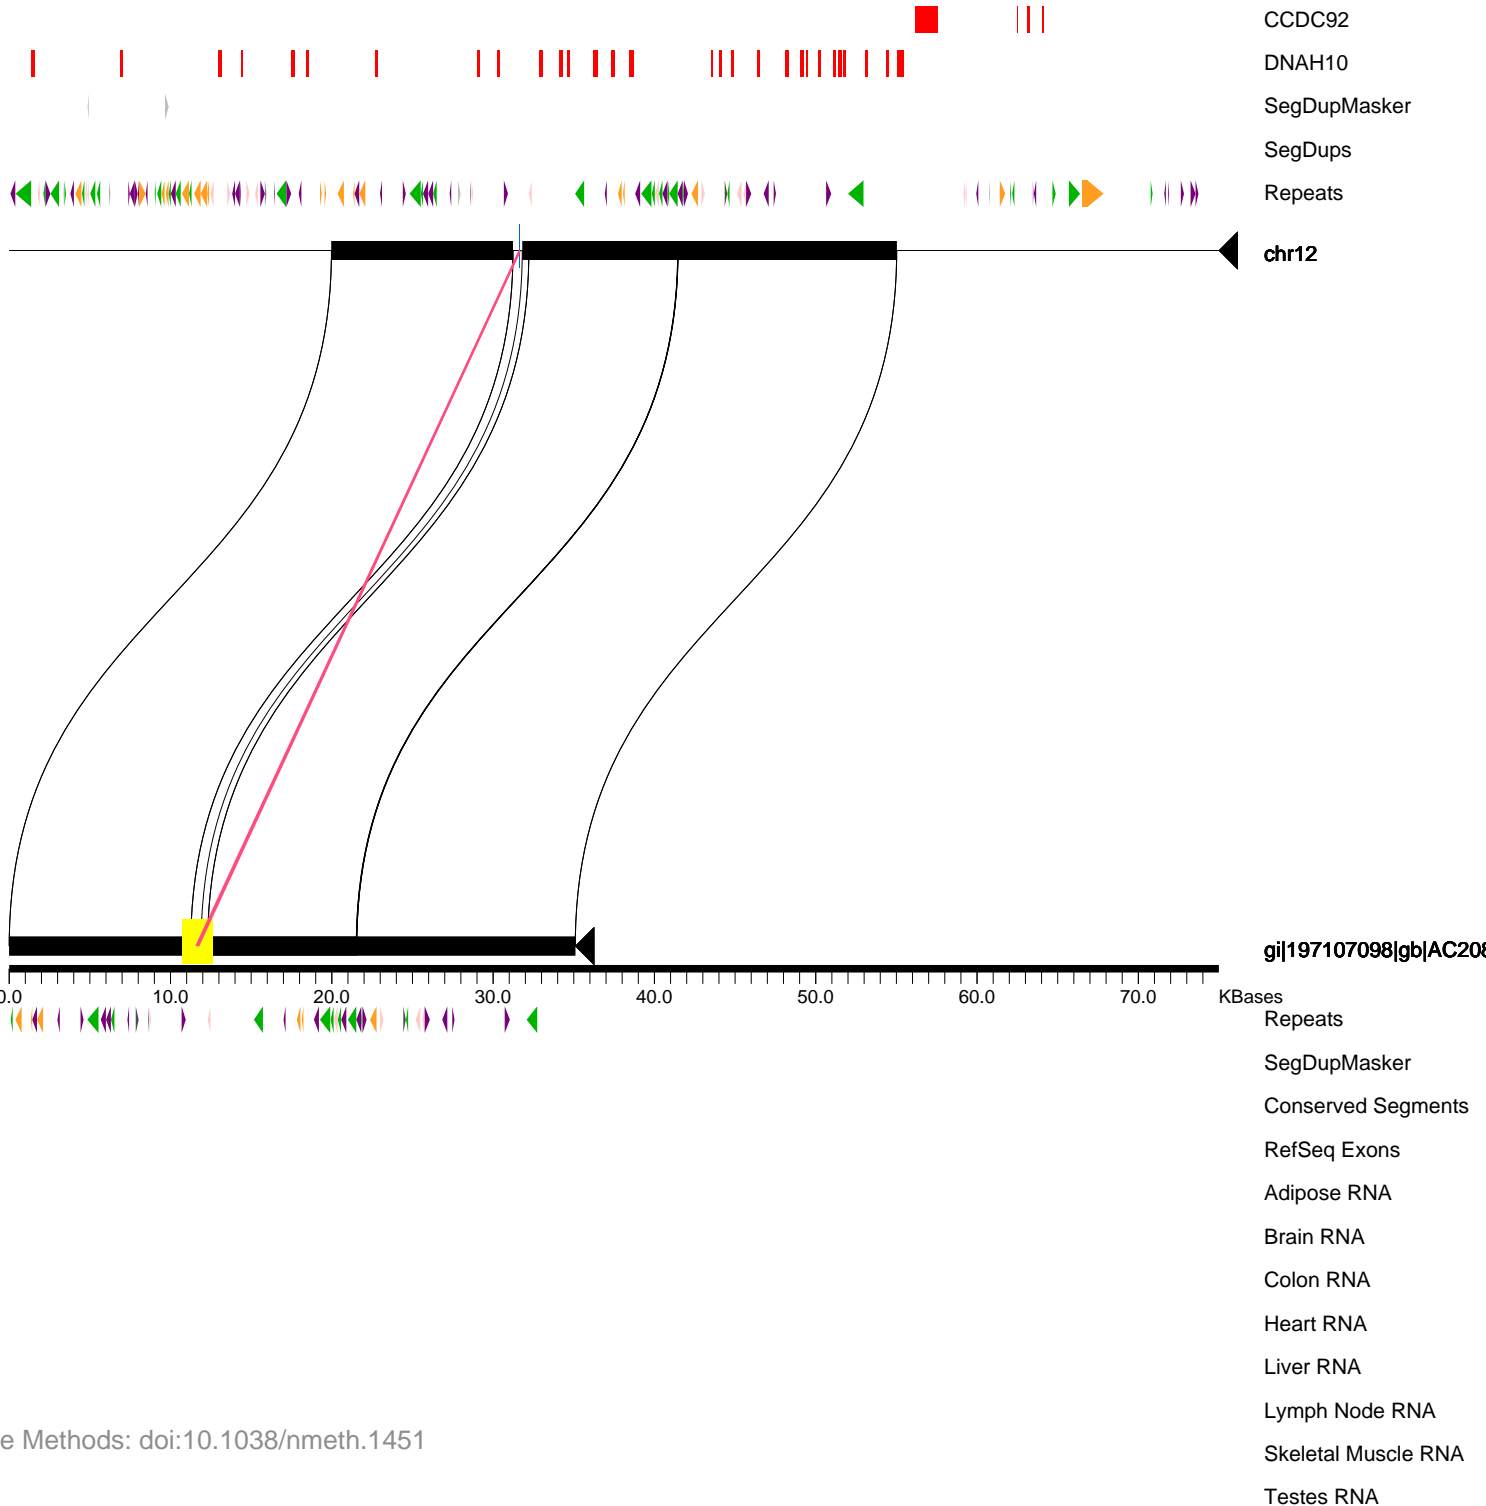

Clone file = AC208103.rc.fa

Insertion Size: 7049

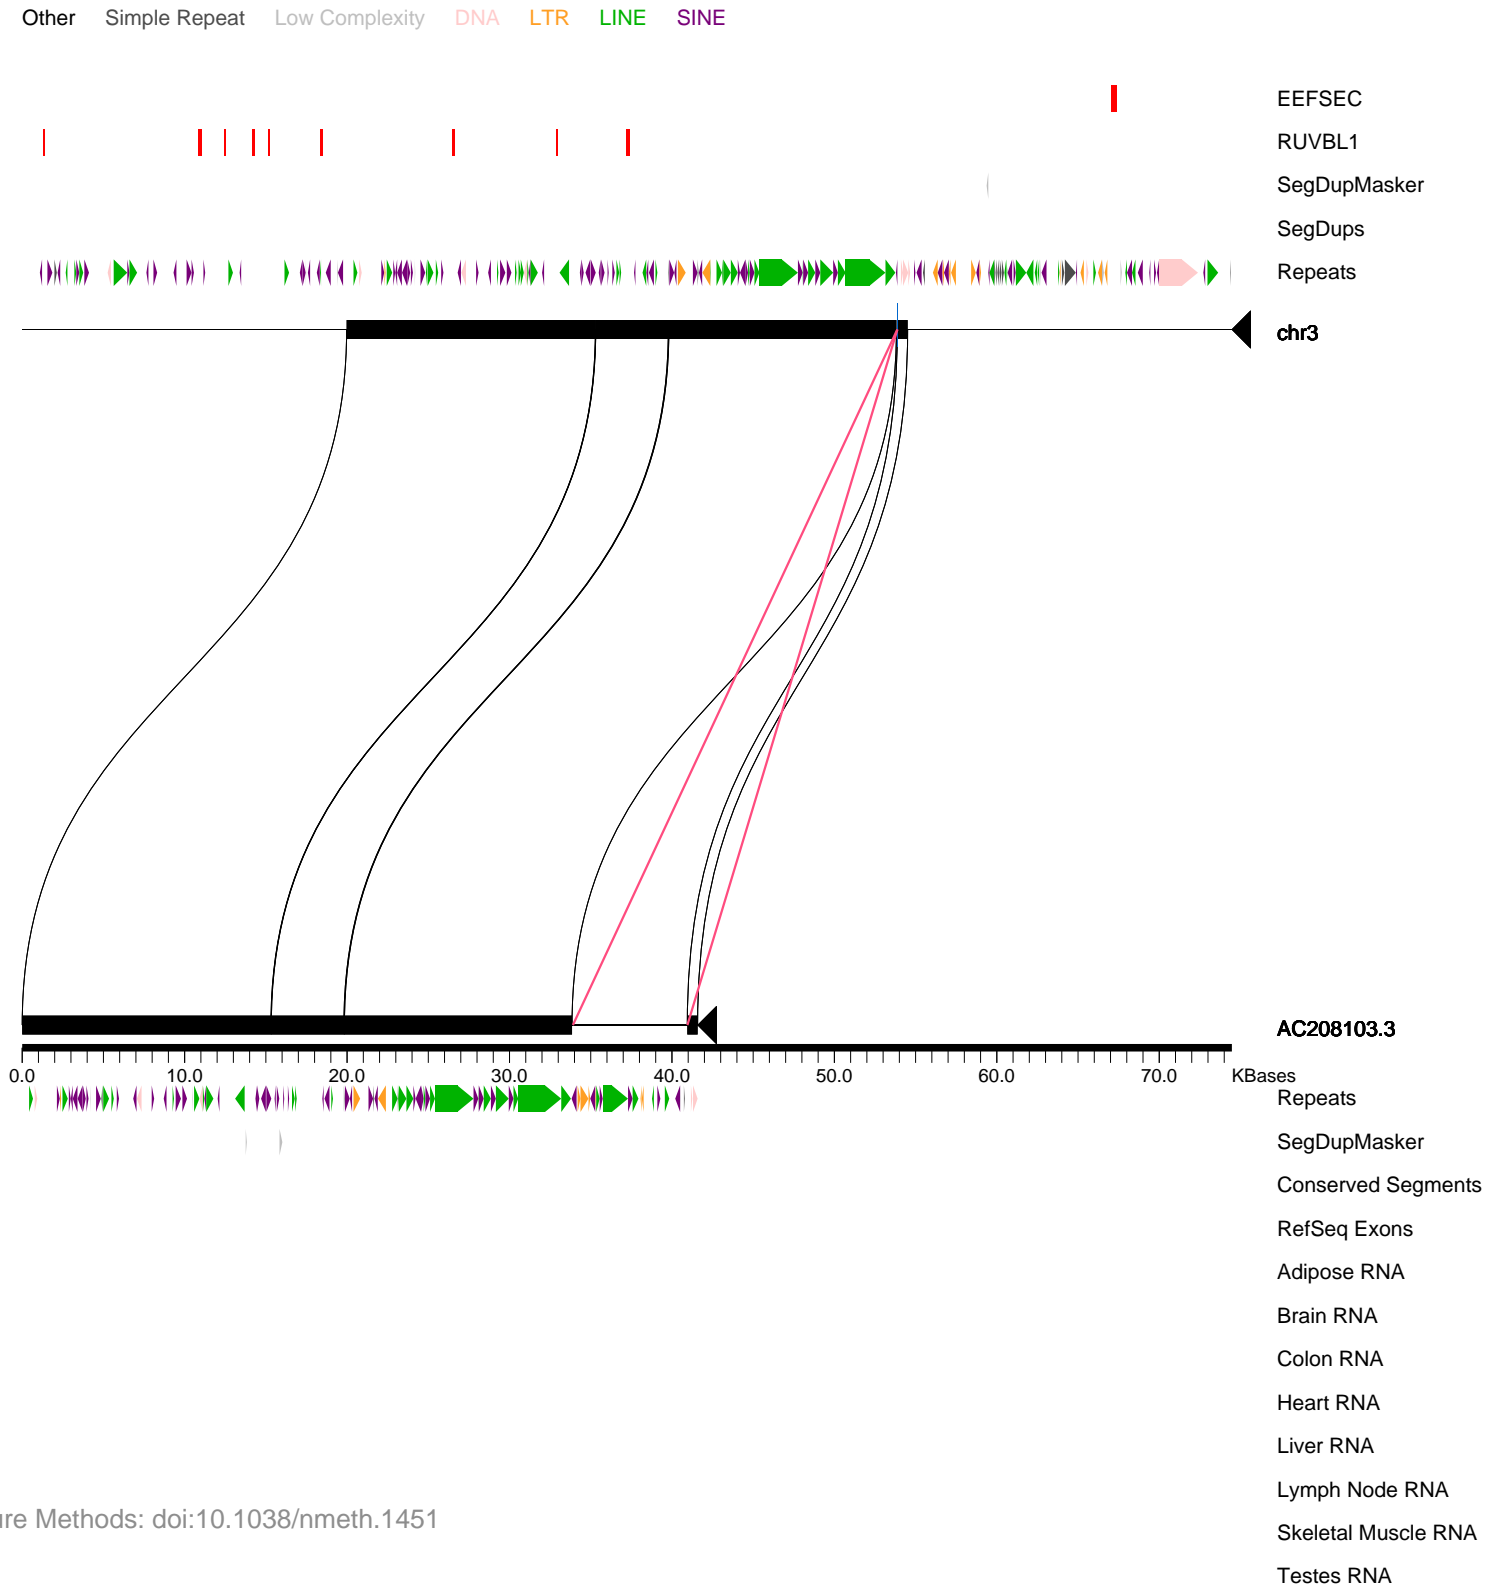

Clone file = AC208169.rc.fa

Insertion Size: 3070

Other Simple Repeat Low Complexity DNA LTR LINE SINE

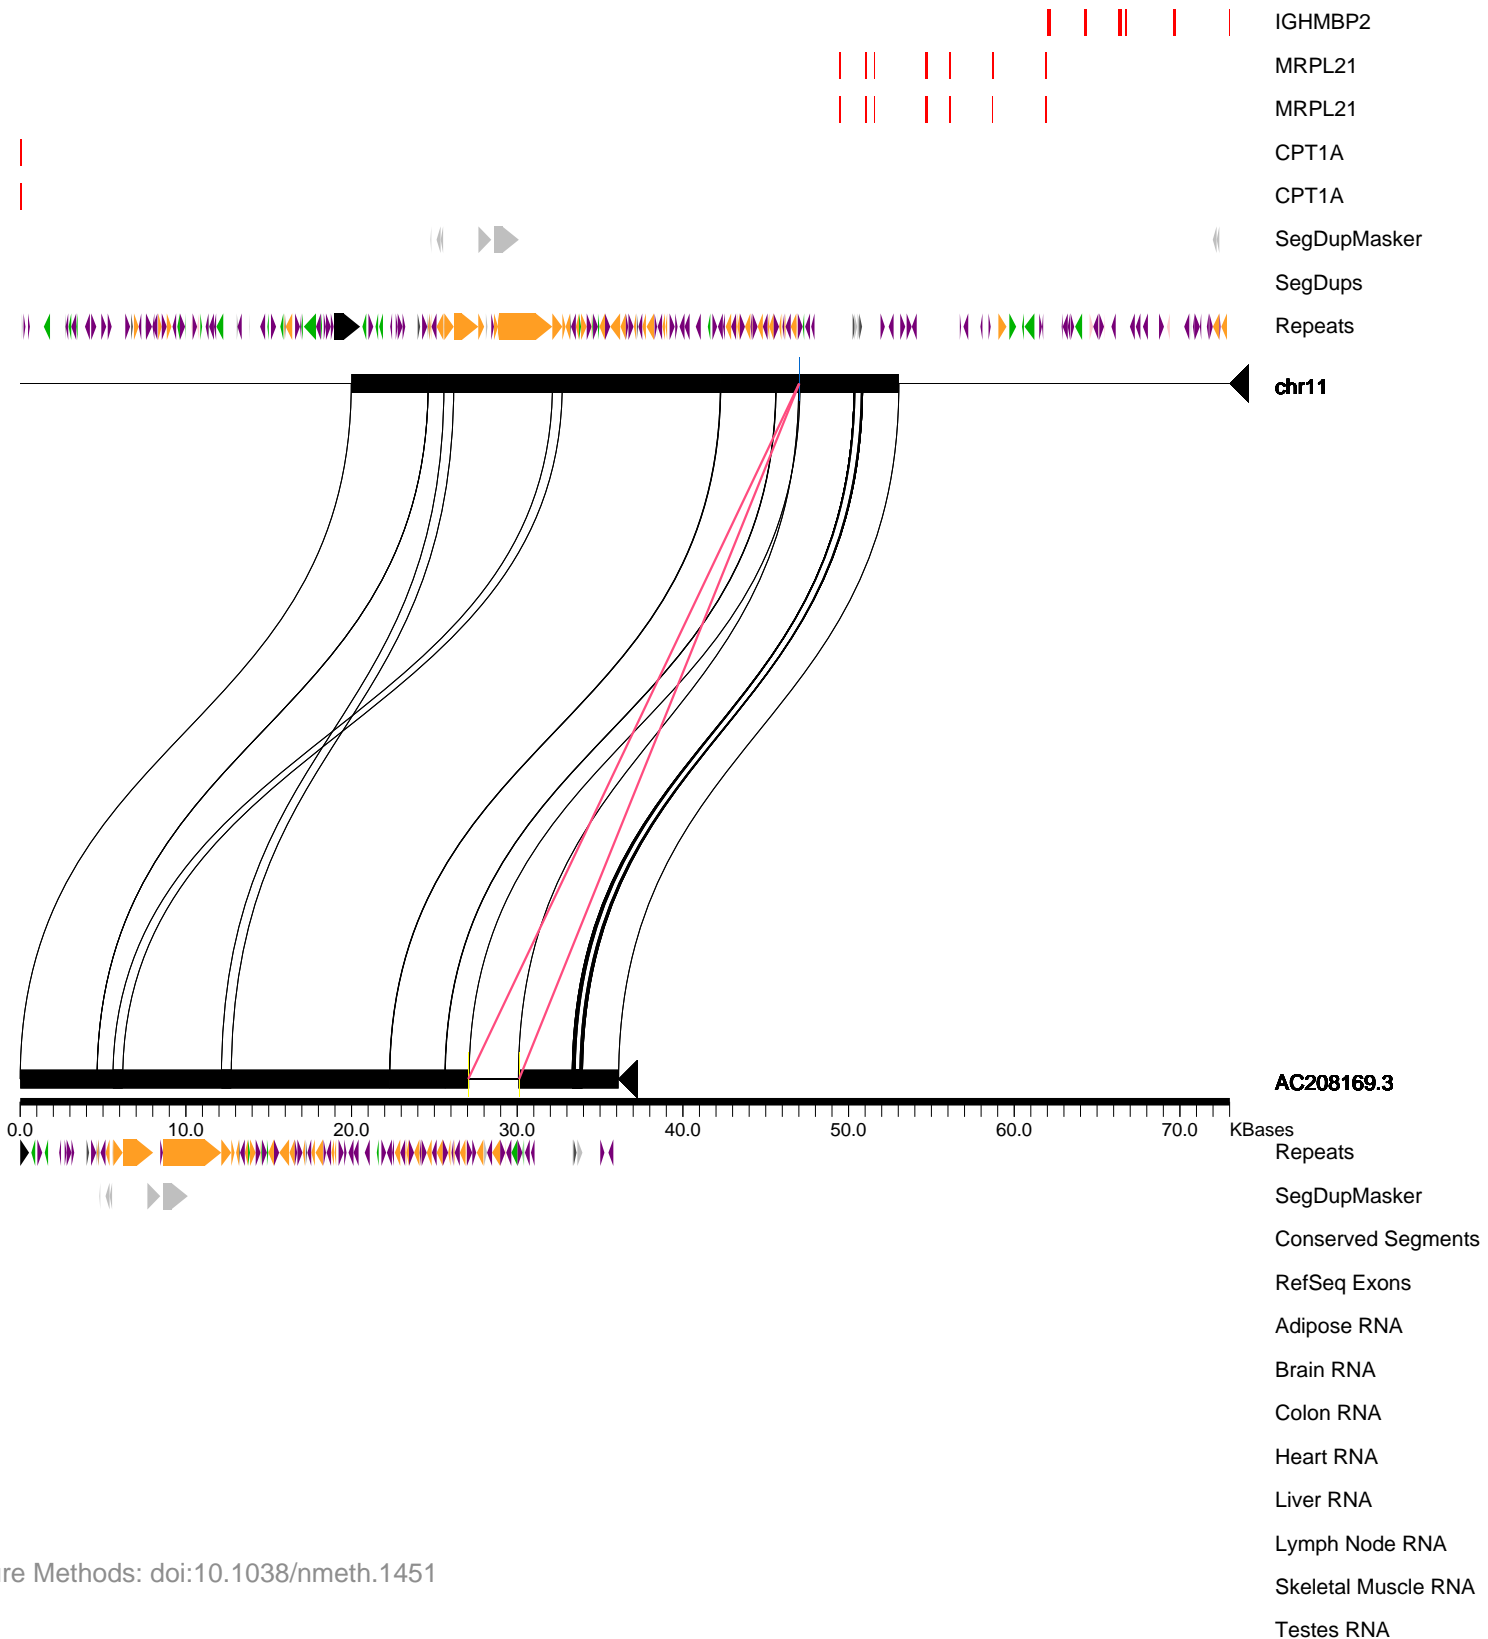

Clone file = AC208170.fa

Insertion Size: 17268

Other Simple Repeat Low Complexity DNA LTR LINE SINE

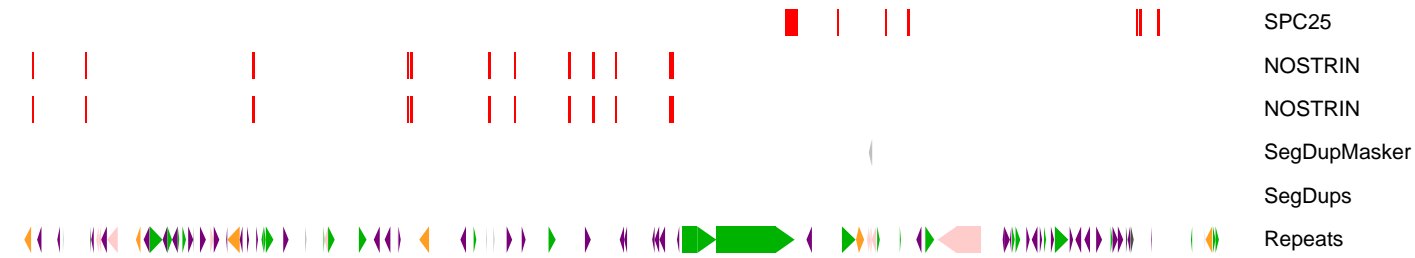

chr2

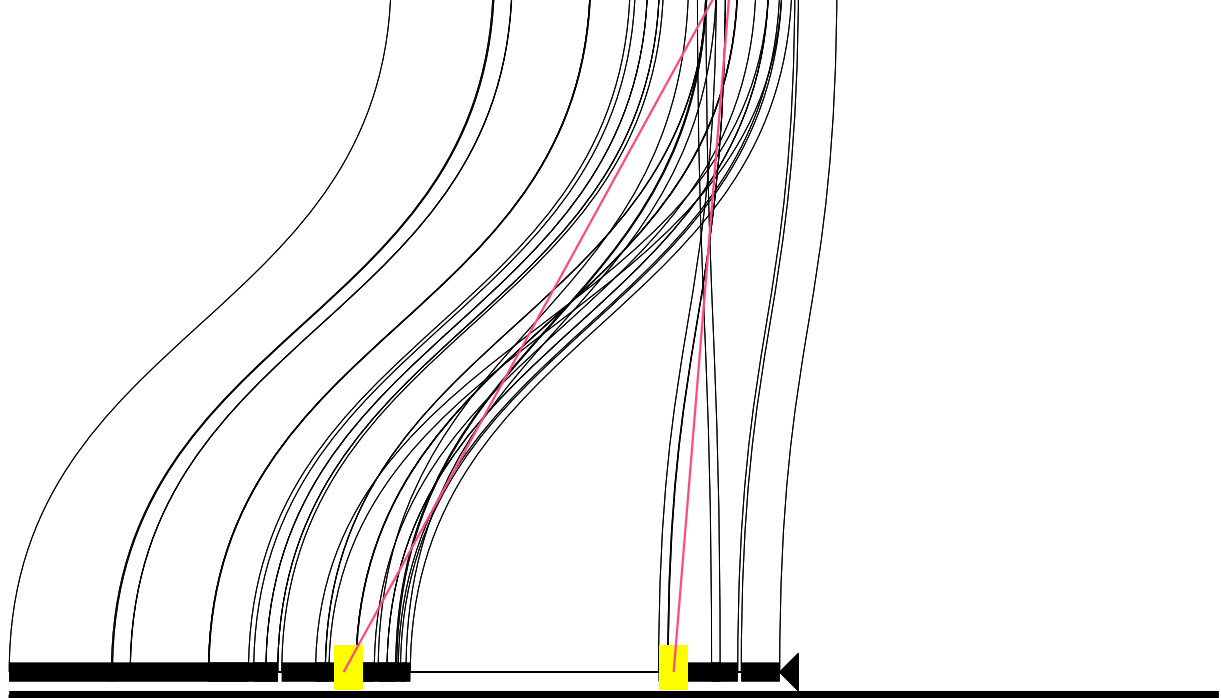

gi|158087989|gb|AC208170

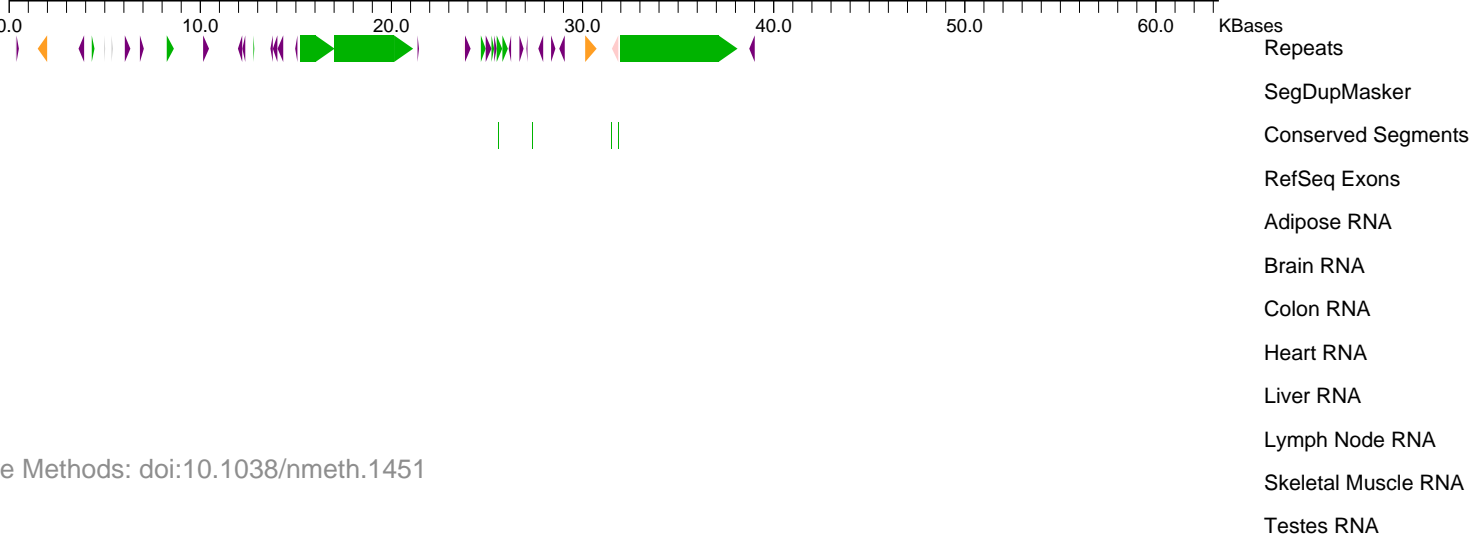

Clone file = AC208190.rc.fa

Insertion Size: 3547

Other Simple Repeat Low Complexity DNA LTR LINE SINE

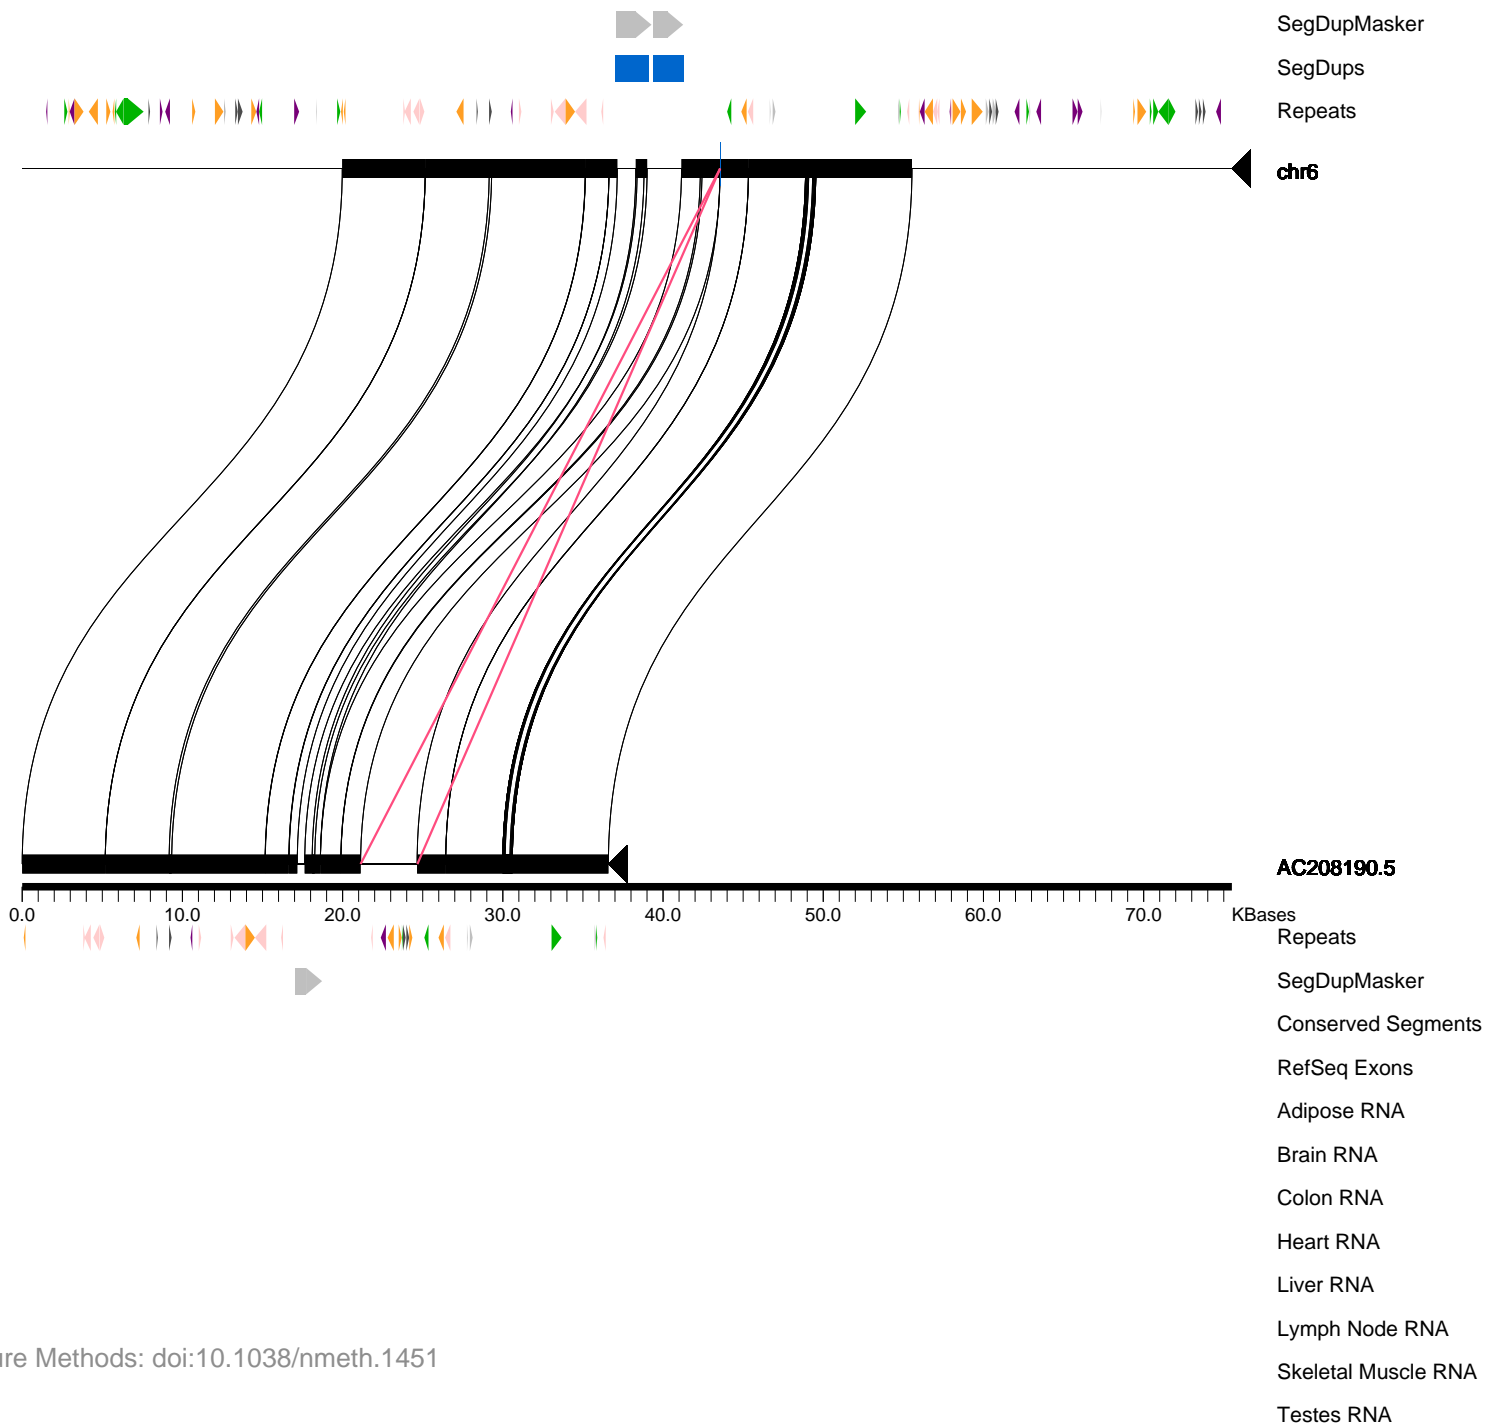

Clone file = AC208323.fa

Insertion Size: 2419

Other Simple Repeat Low Complexity DNA LTR LINE SINE

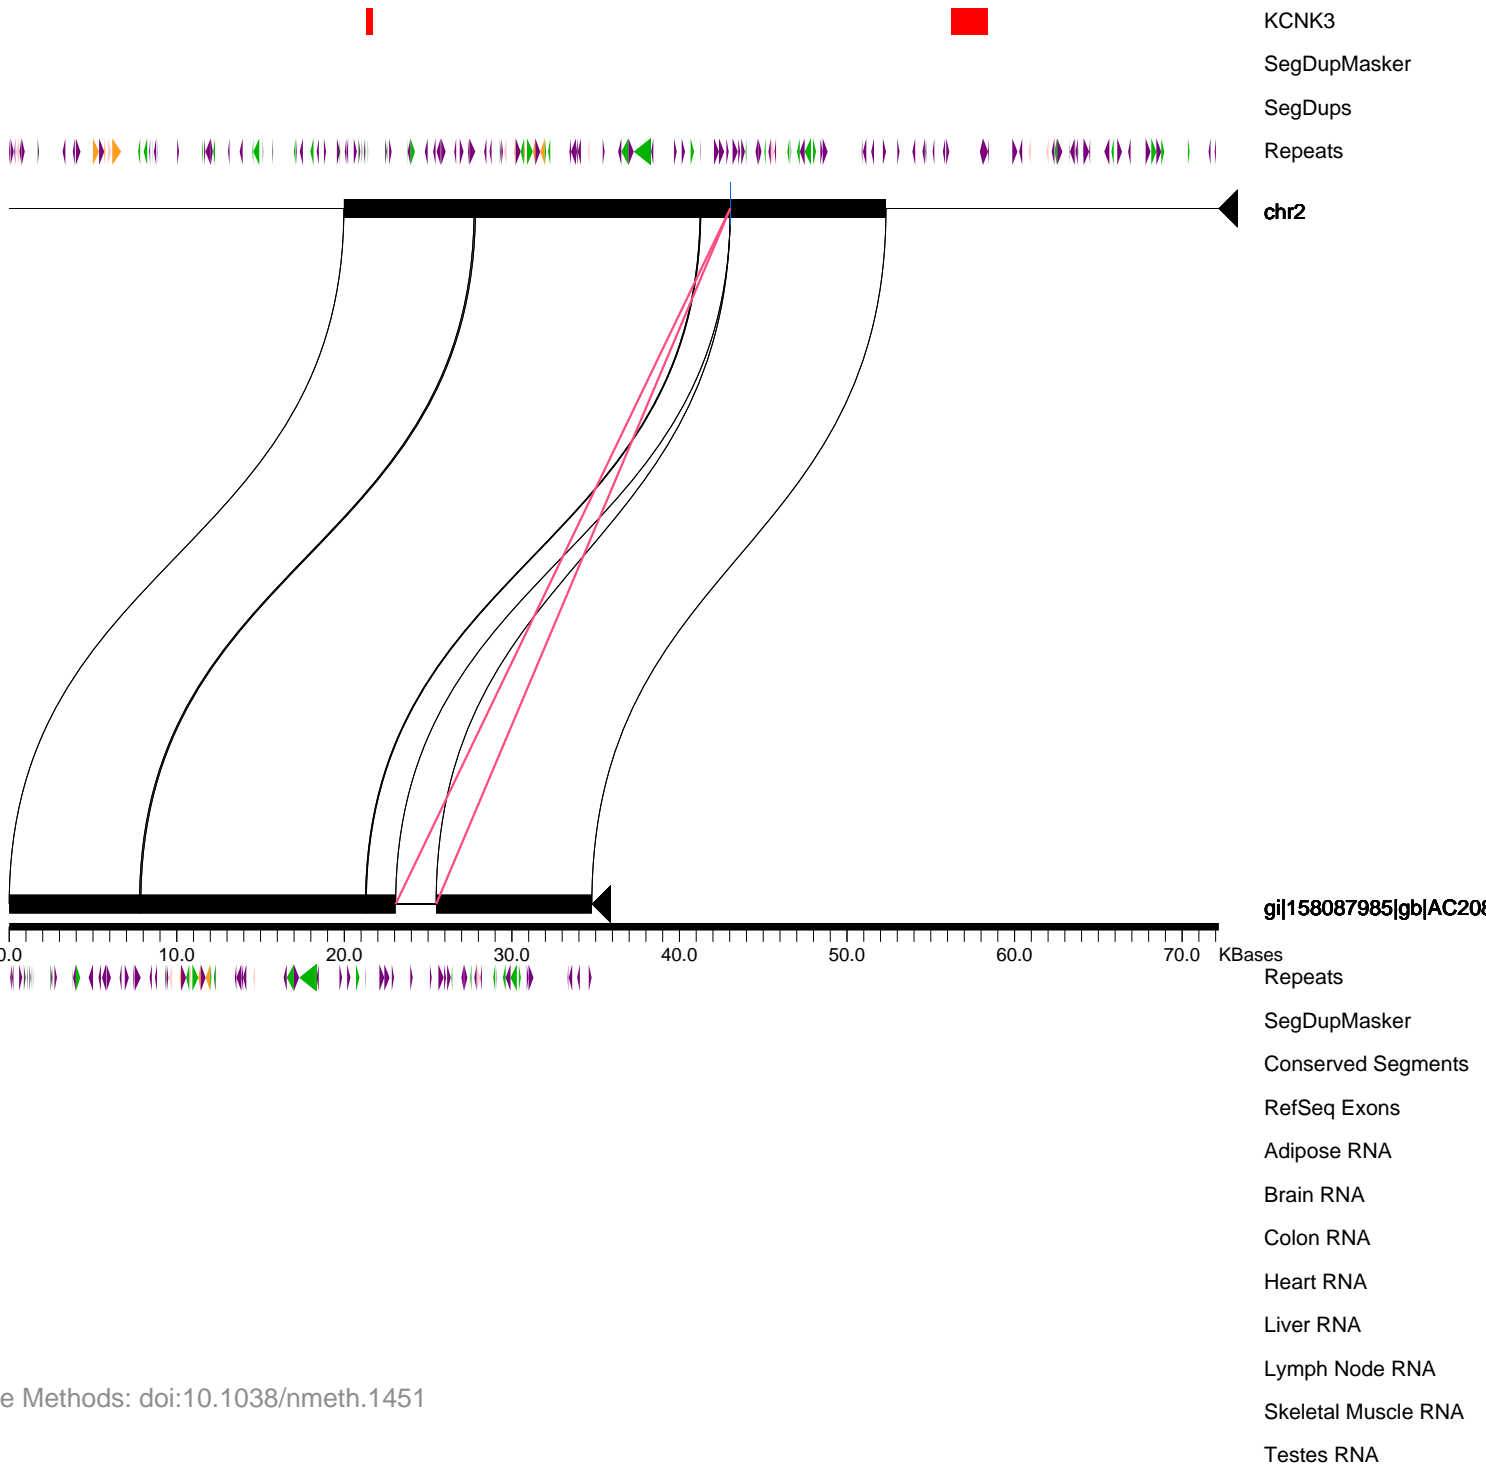



Clone file = AC208324.rc.fa

Insertion Size: 5878

Other Simple Repeat Low Complexity DNA LTR LINE SINE

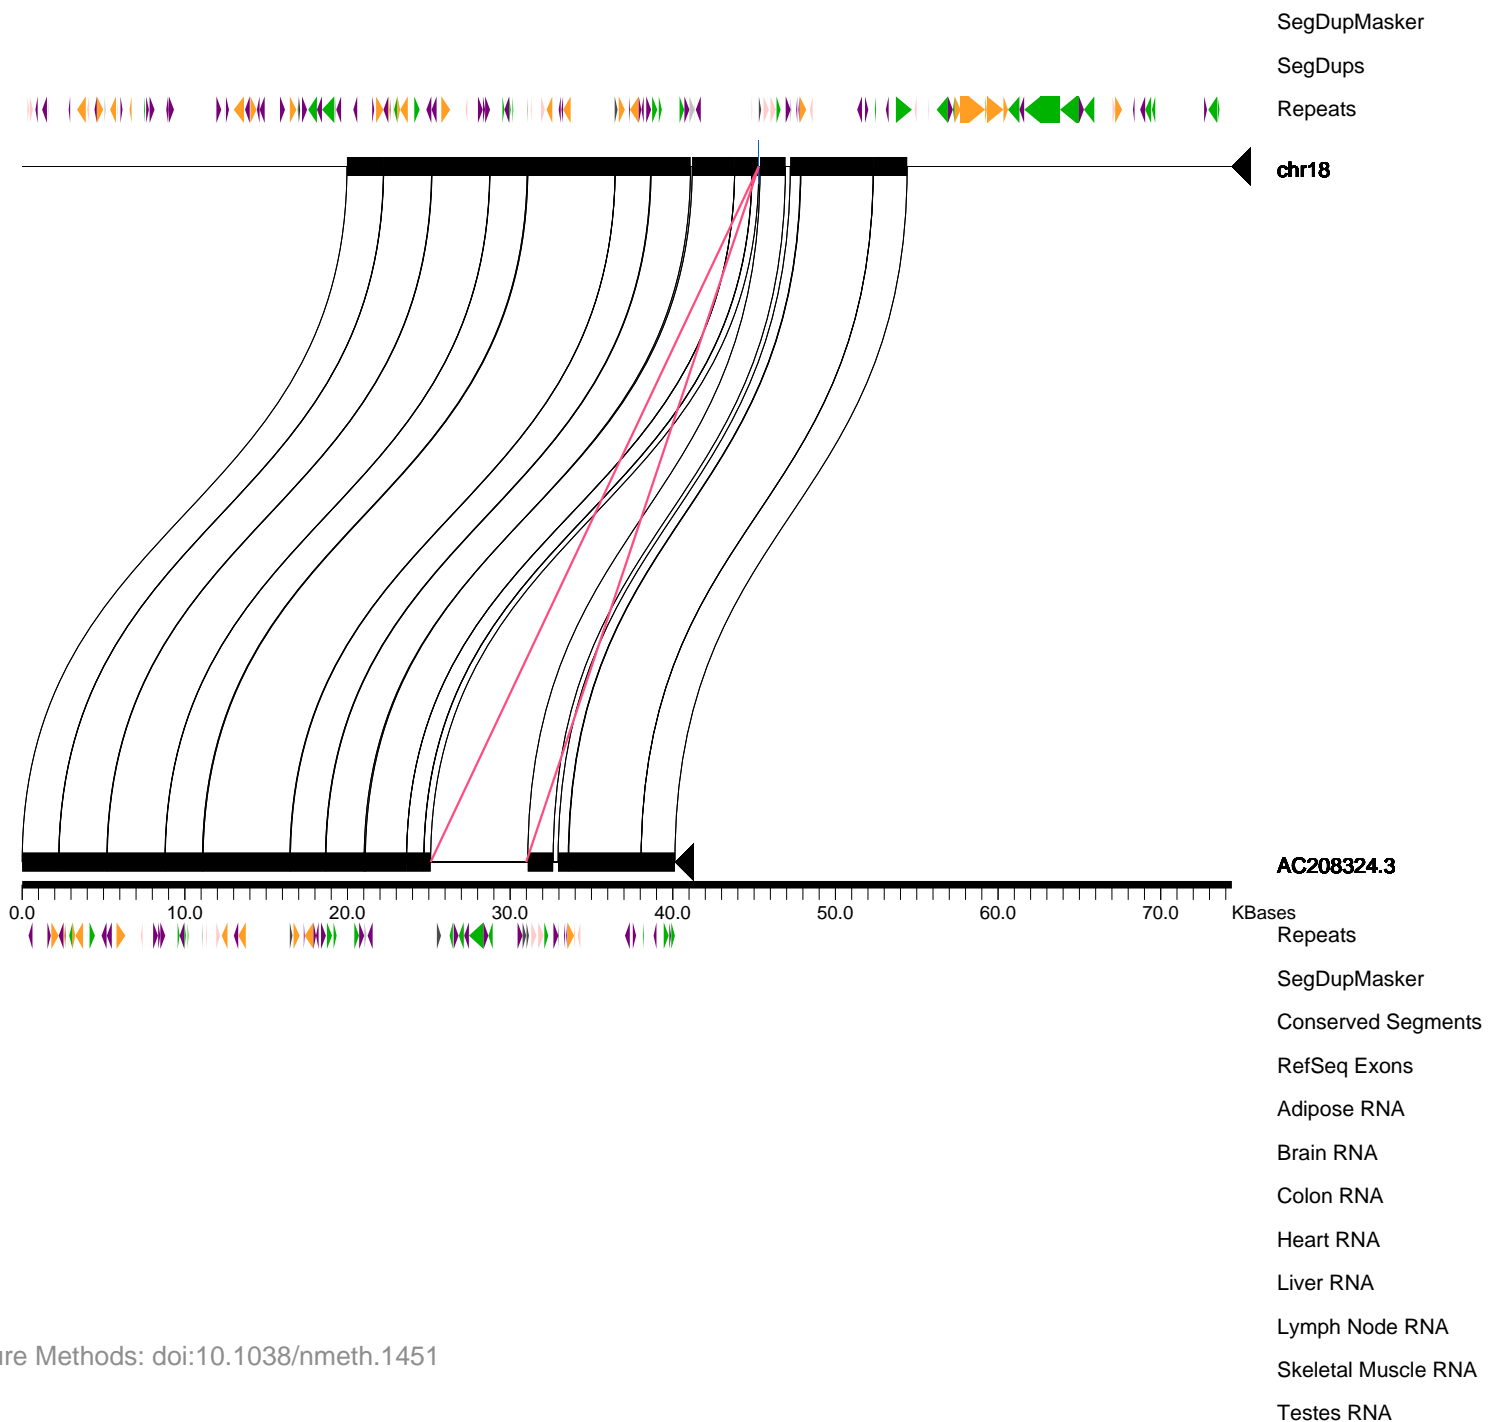

Clone file = AC208502.fa

Insertion Size: 5067

Other Simple Repeat Low Complexity DNA LTR LINE SINE

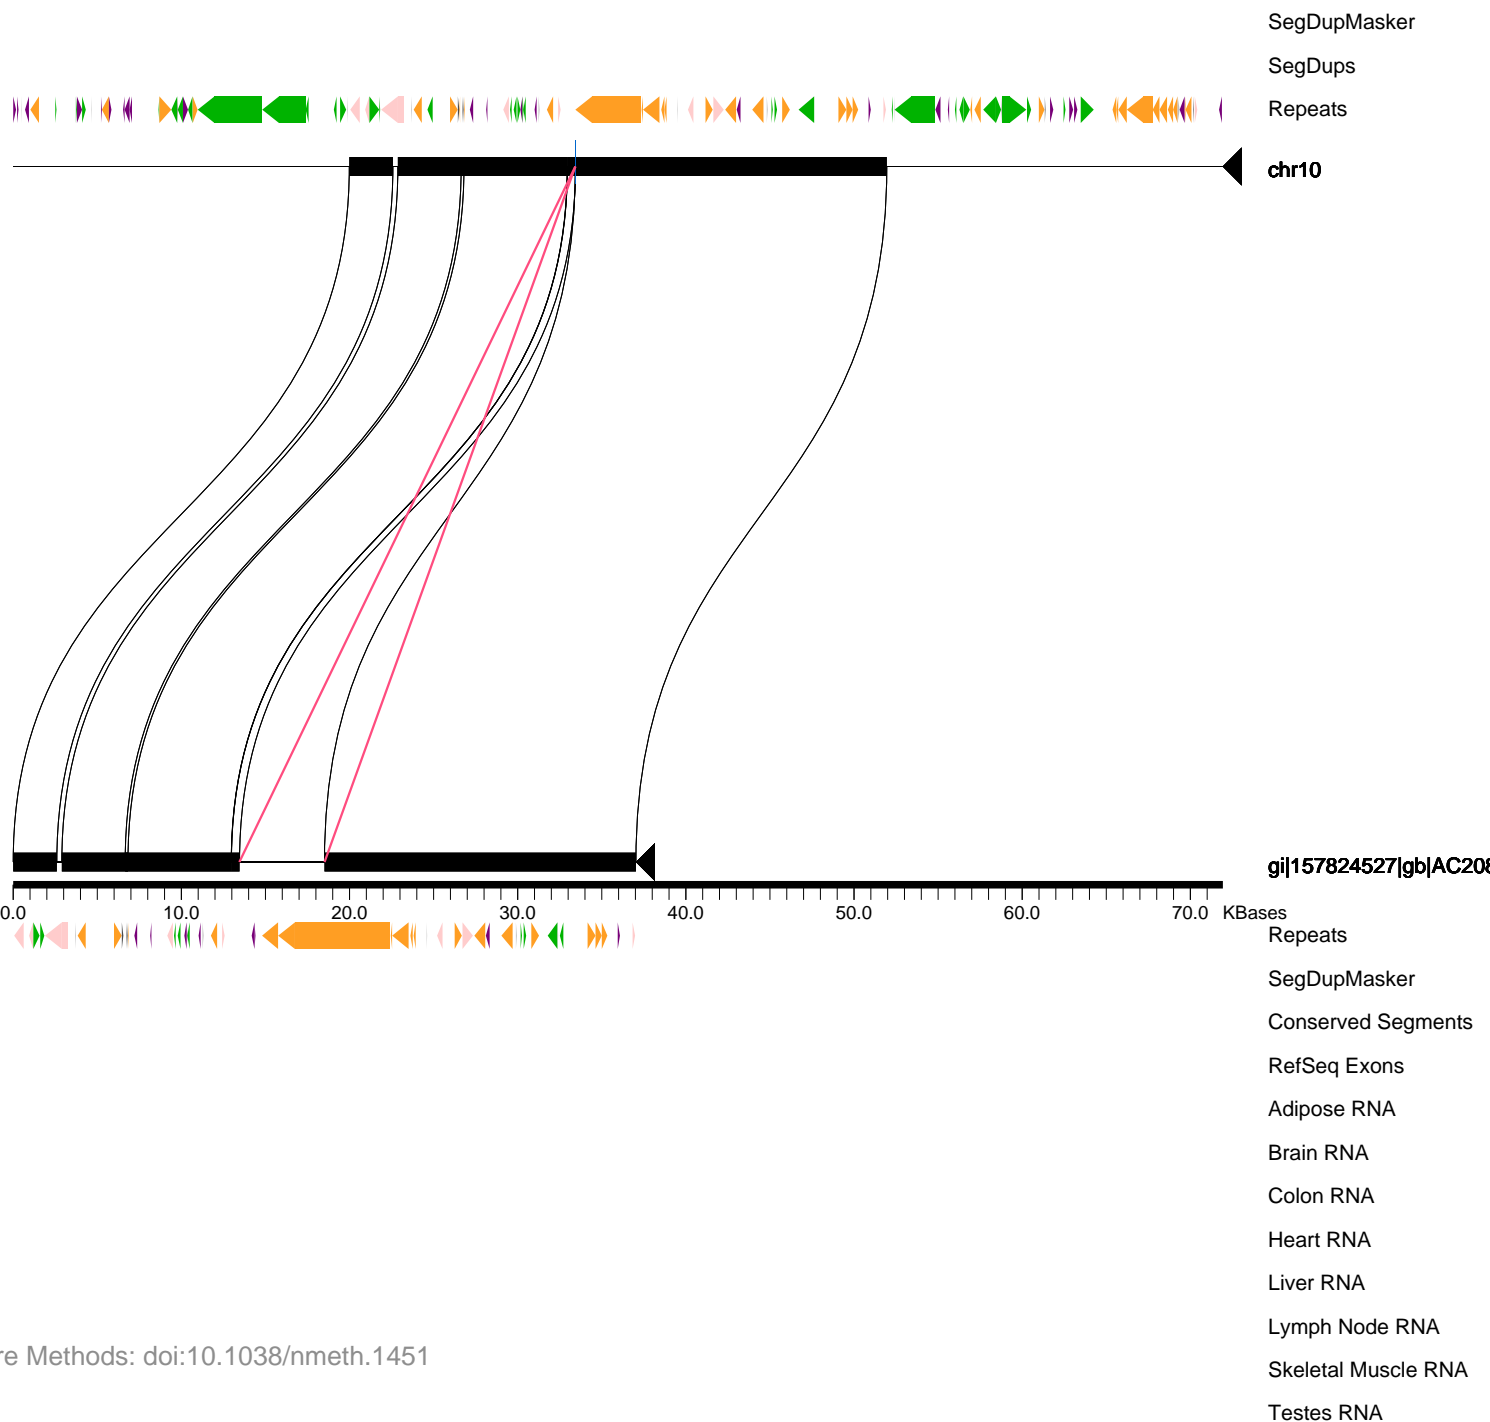

Clone file = AC208582.rc.fa

Insertion Size: 7129

Other Simple Repeat Low Complexity DNA LTR LINE SINE

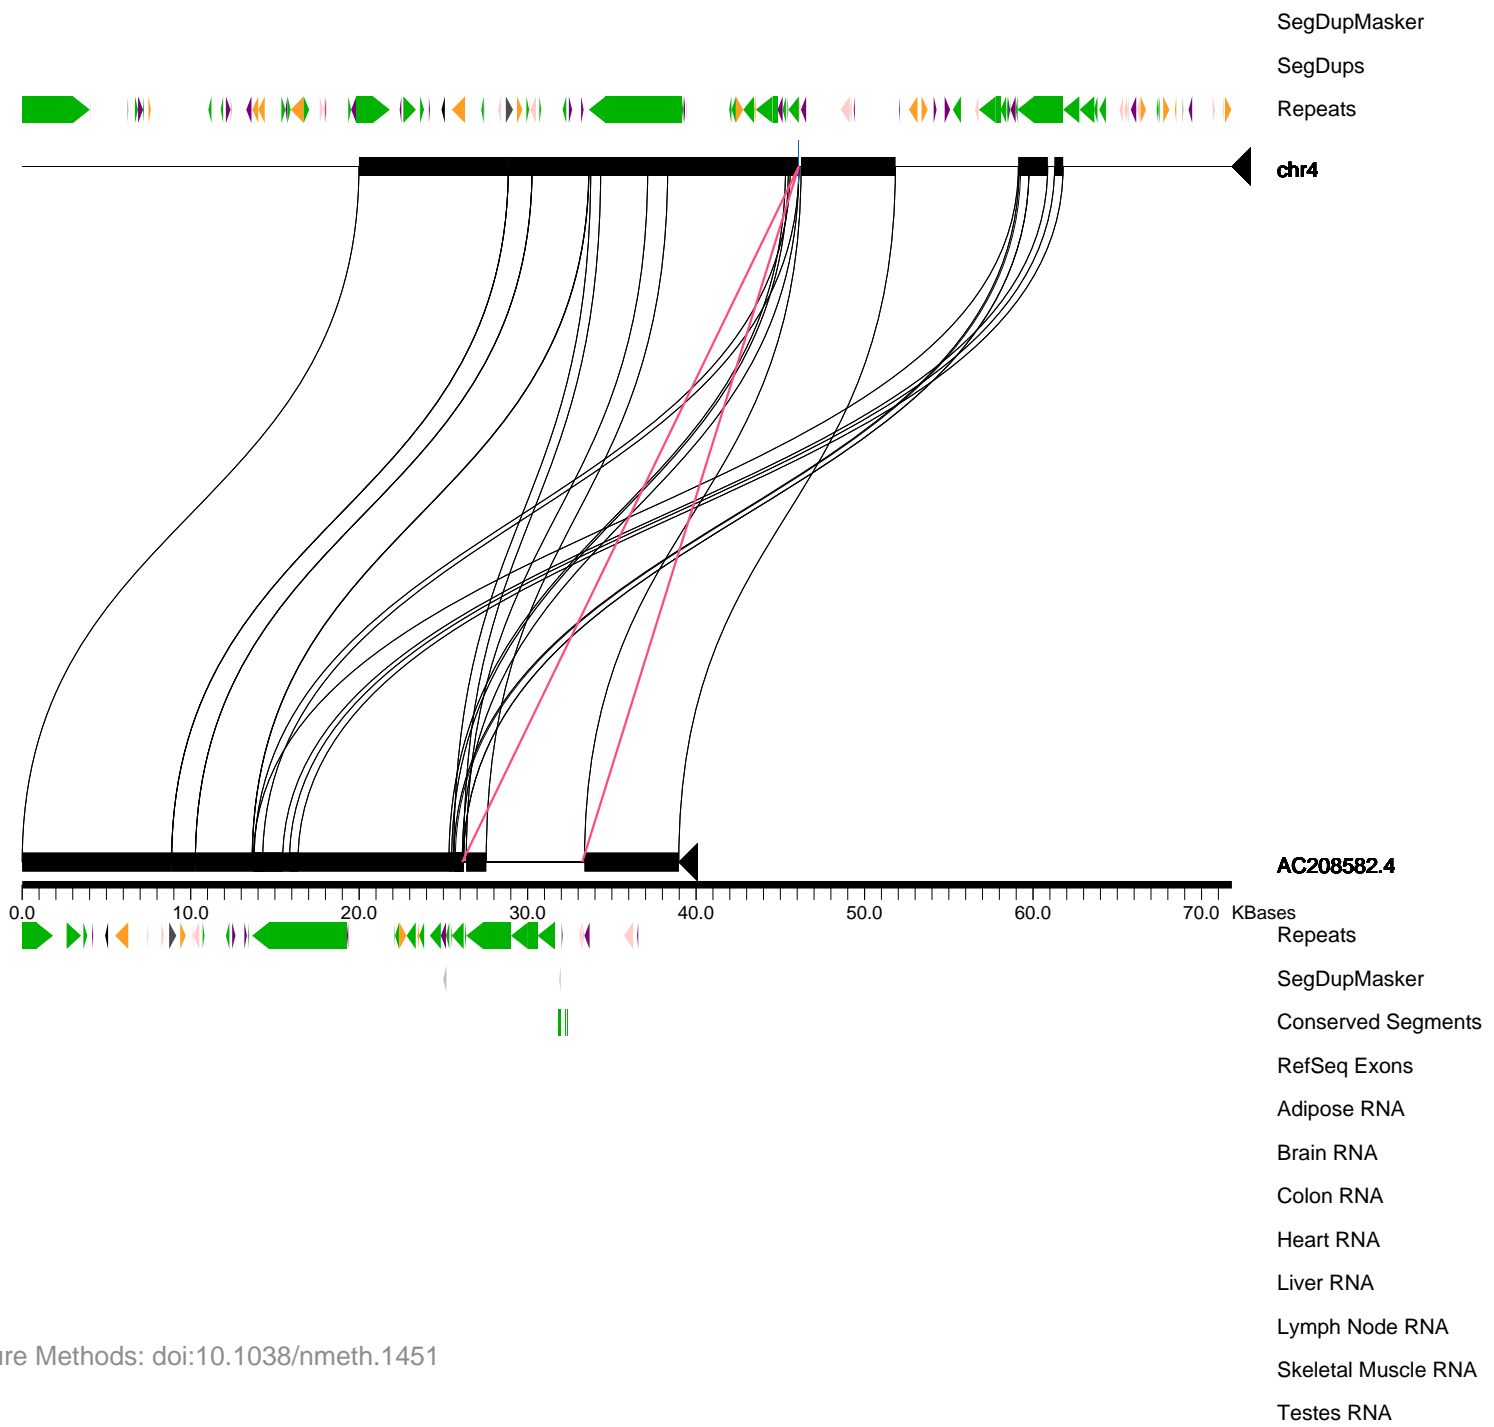

Clone file = AC208590.rc.fa

Insertion Size: 3634

Other Simple Repeat Low Complexity DNA LTR LINE SINE

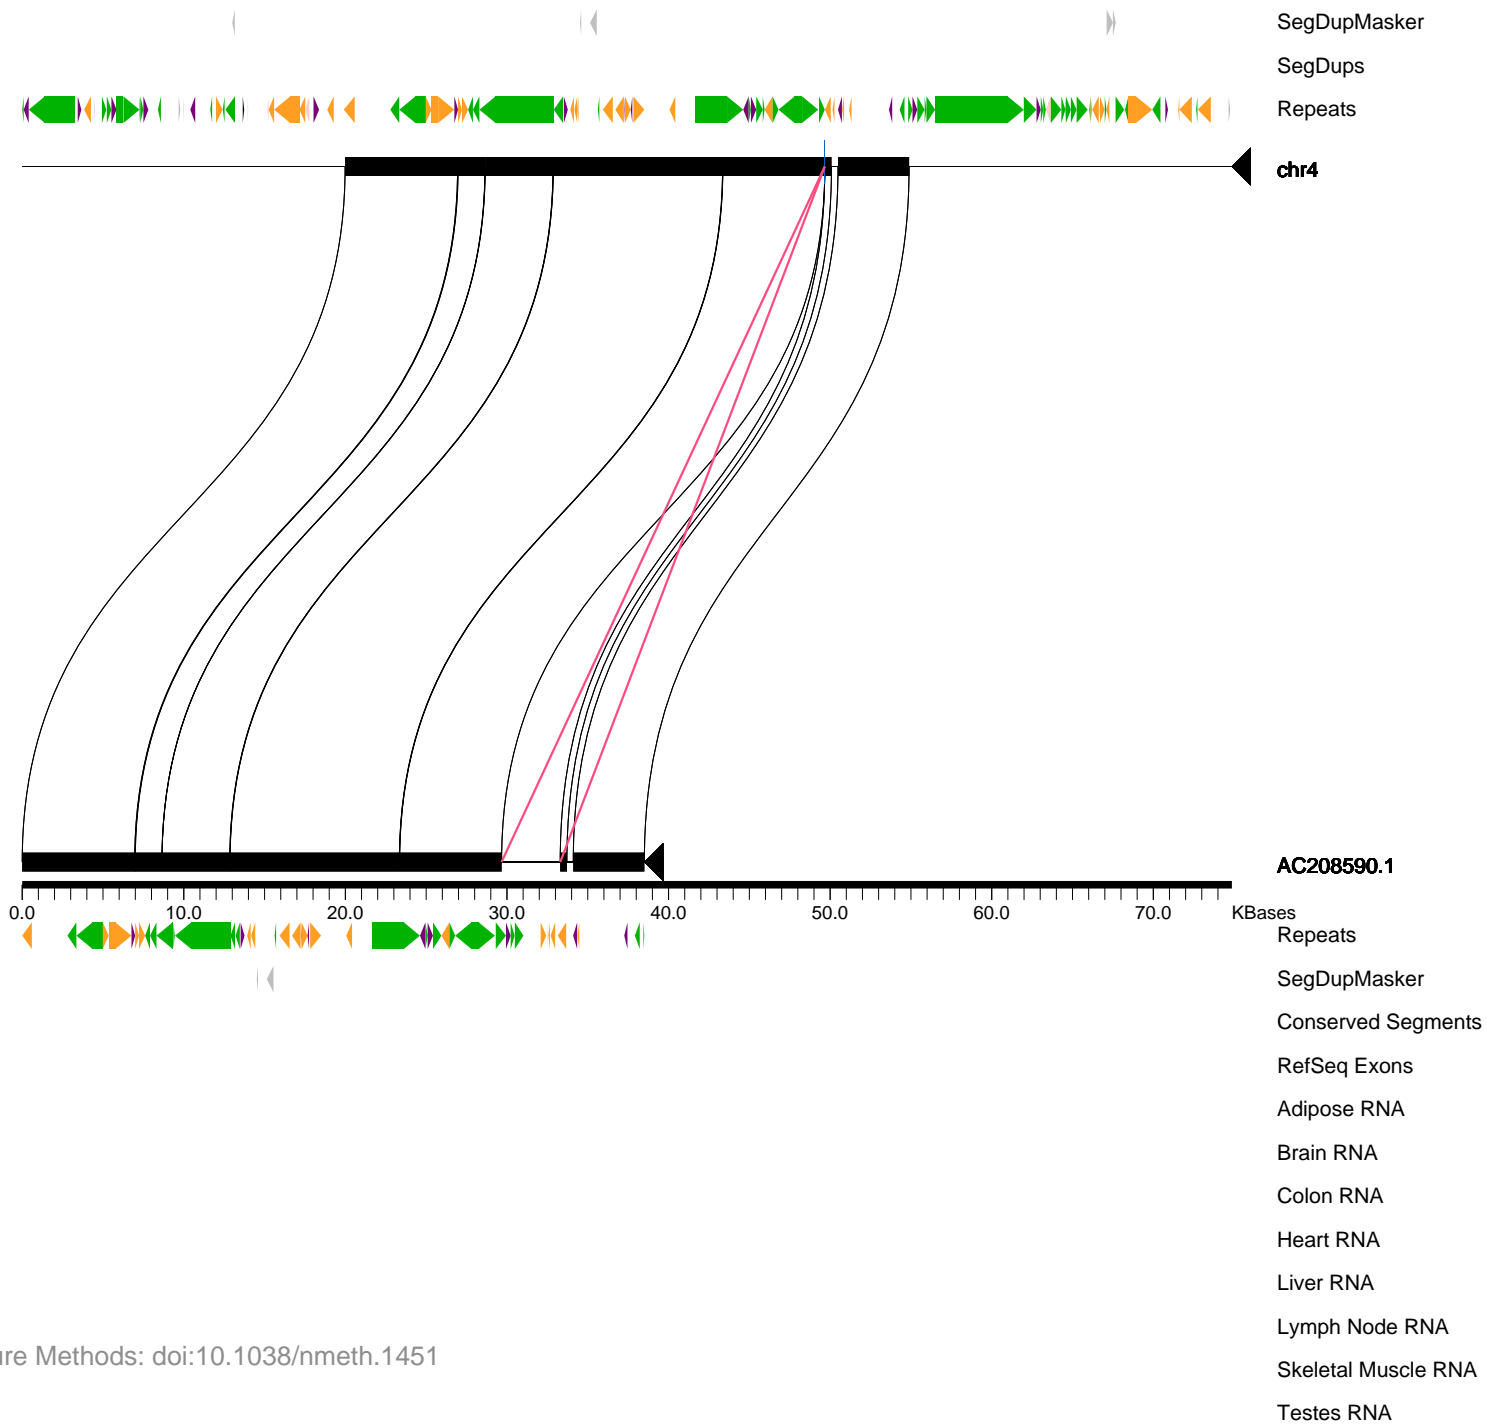

Clone file = AC208716.fa

Insertion Size: 8849

Other Simple Repeat Low Complexity DNA LTR LINE SINE

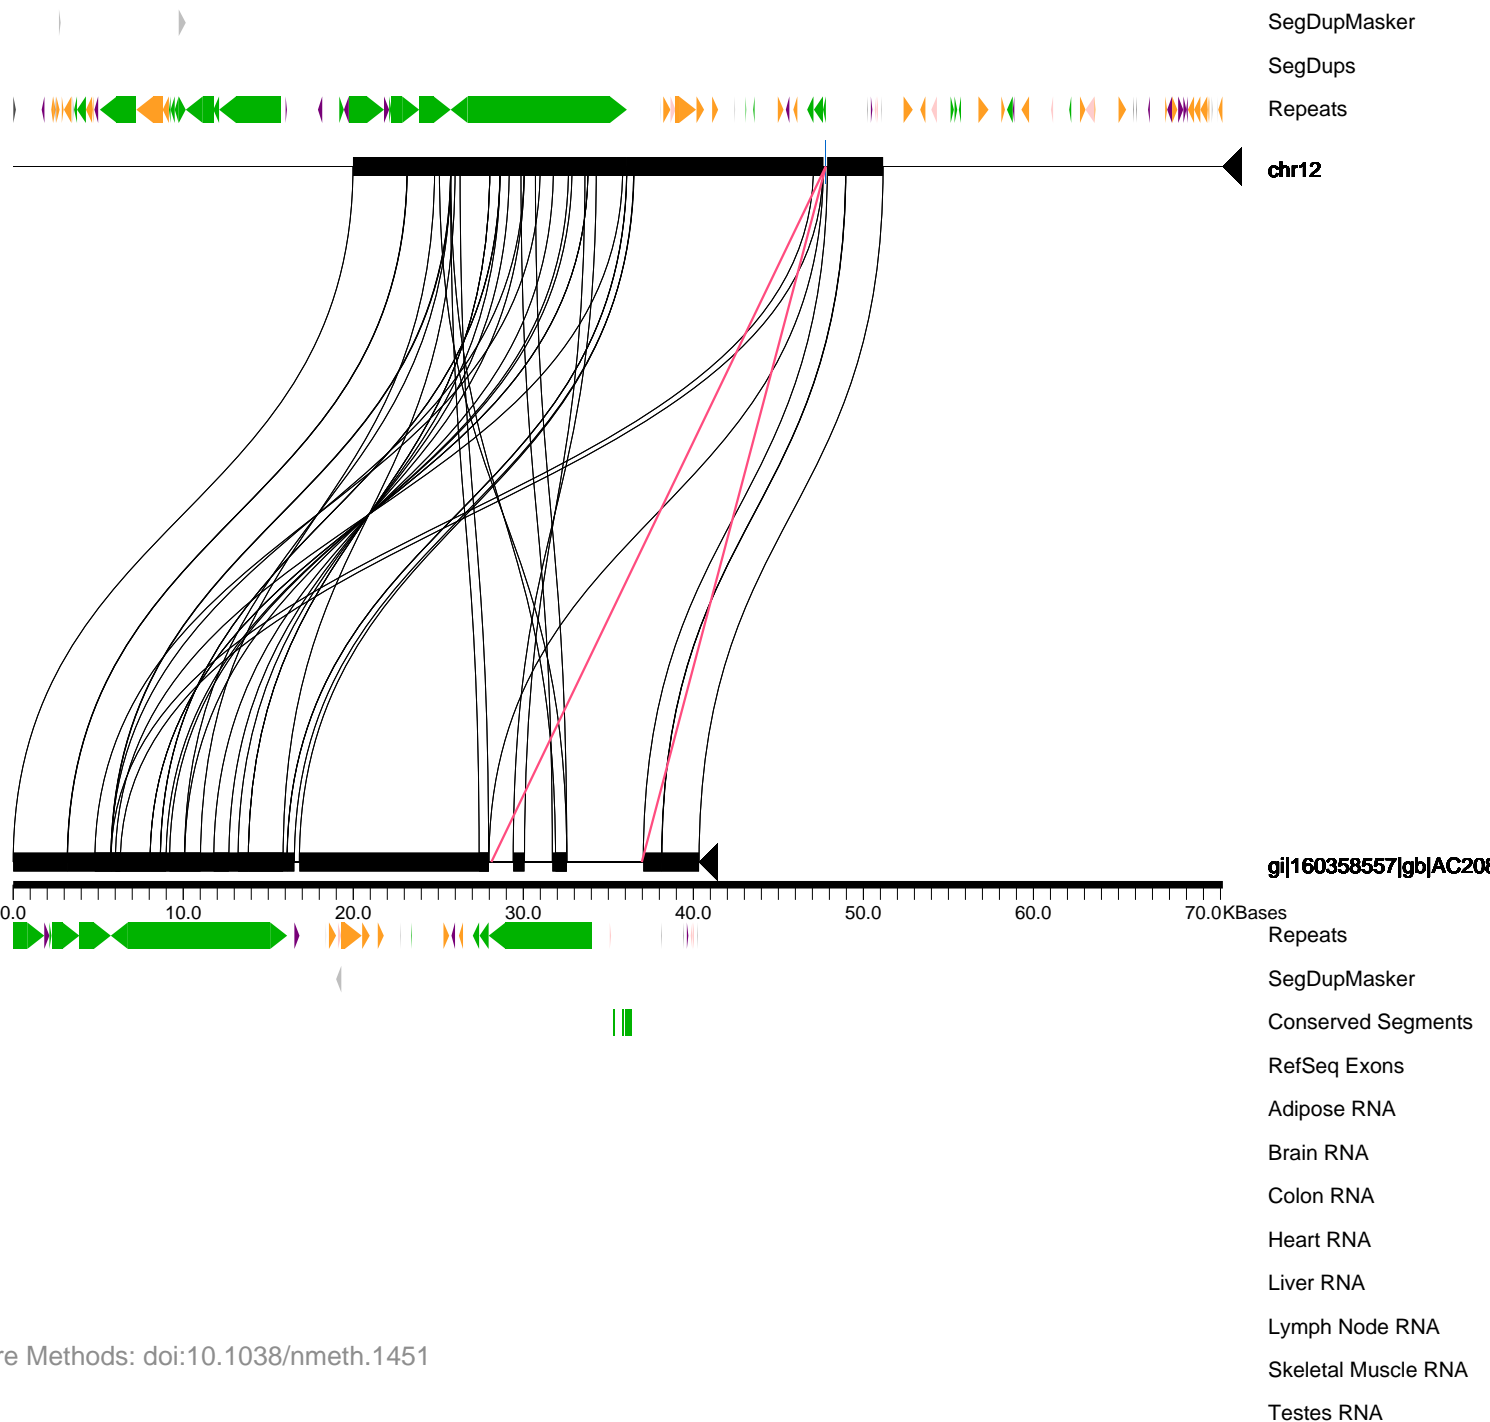

Clone file = AC208786.fa

Insertion Size: 7628

Other Simple Repeat Low Complexity DNA LTR LINE SINE

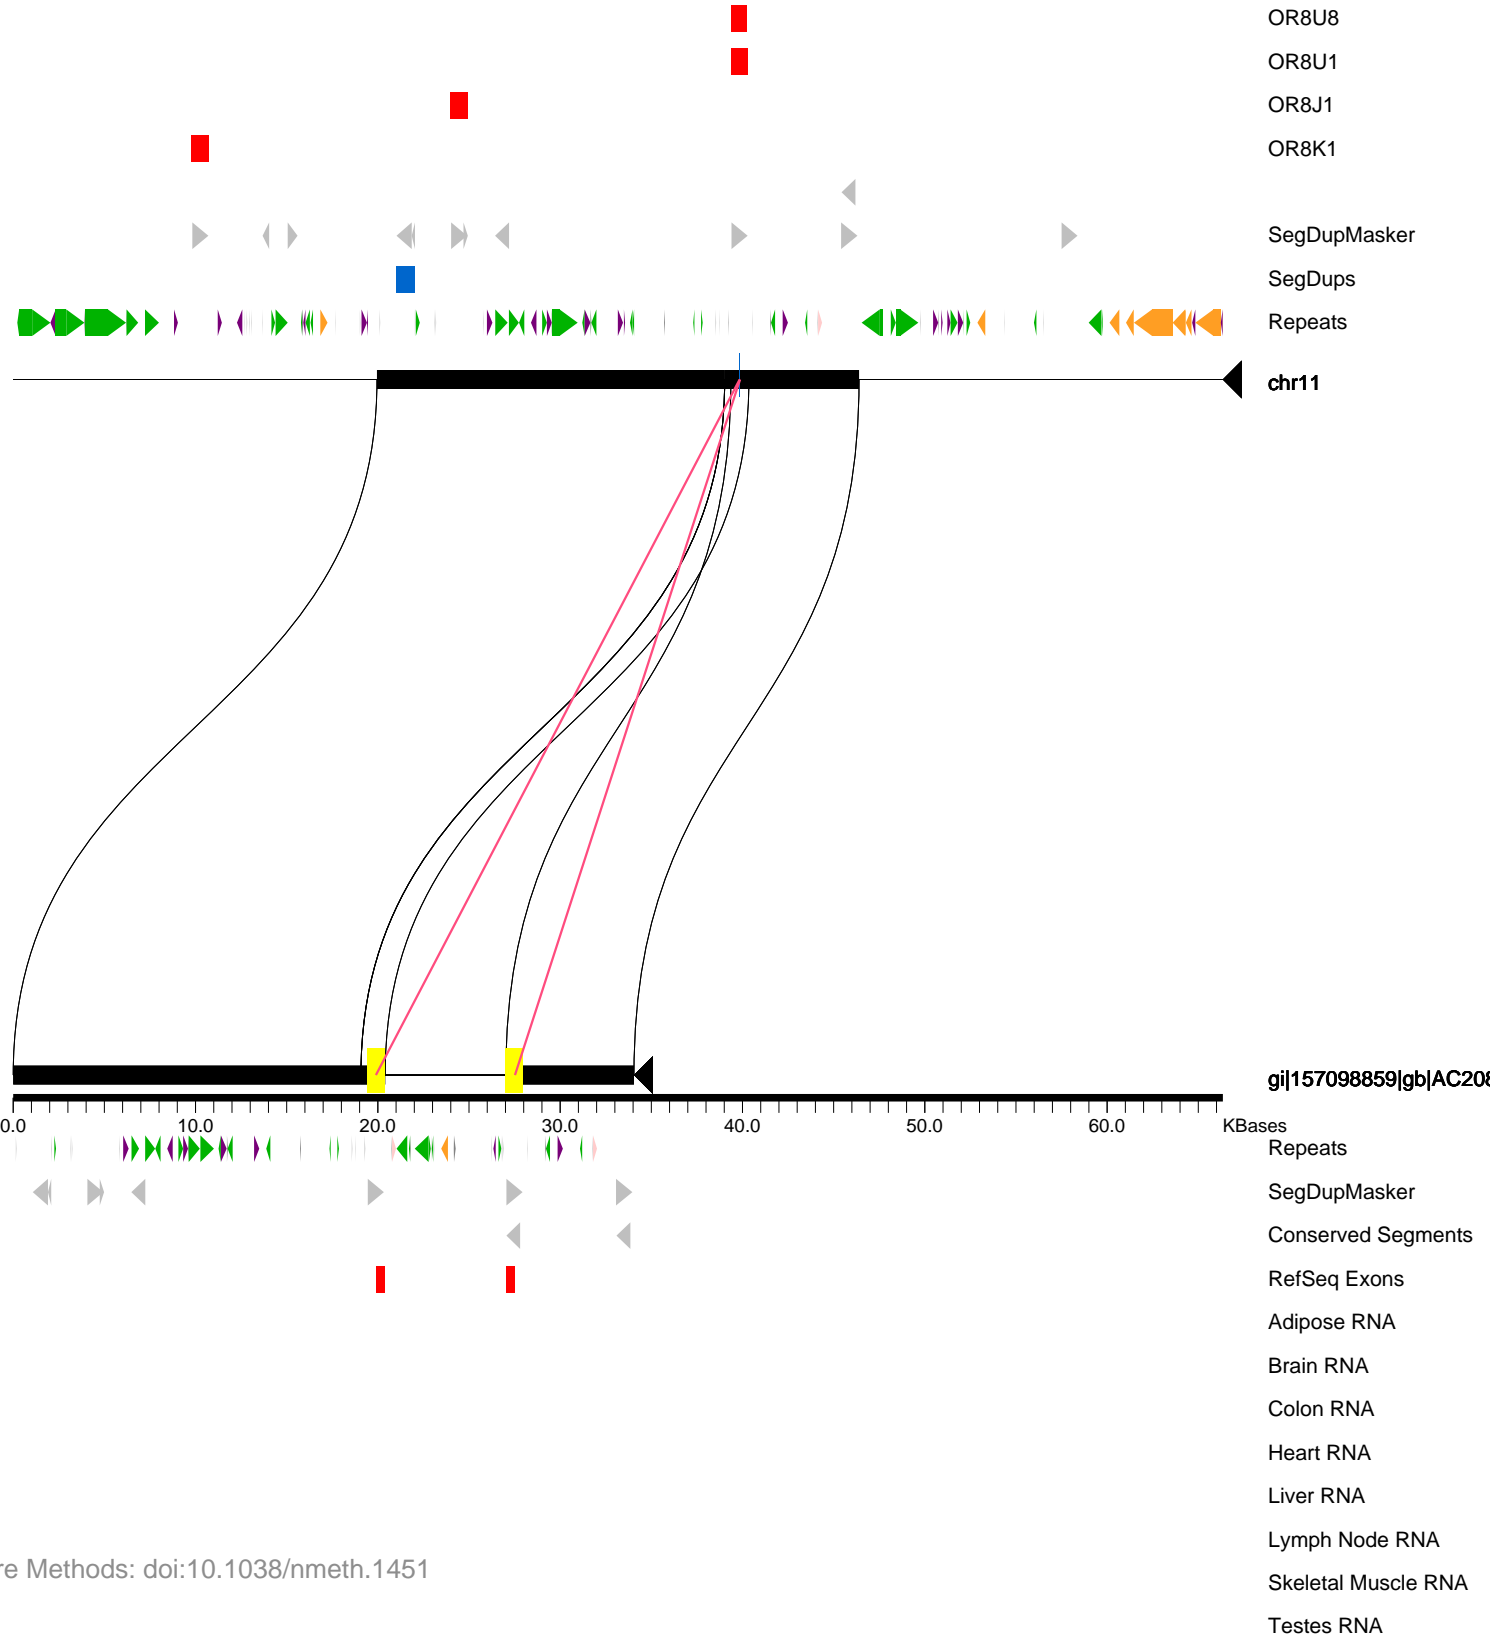

Clone file = AC208871.fa

Insertion Size: 4094

Other Simple Repeat Low Complexity DNA LTR LINE SINE

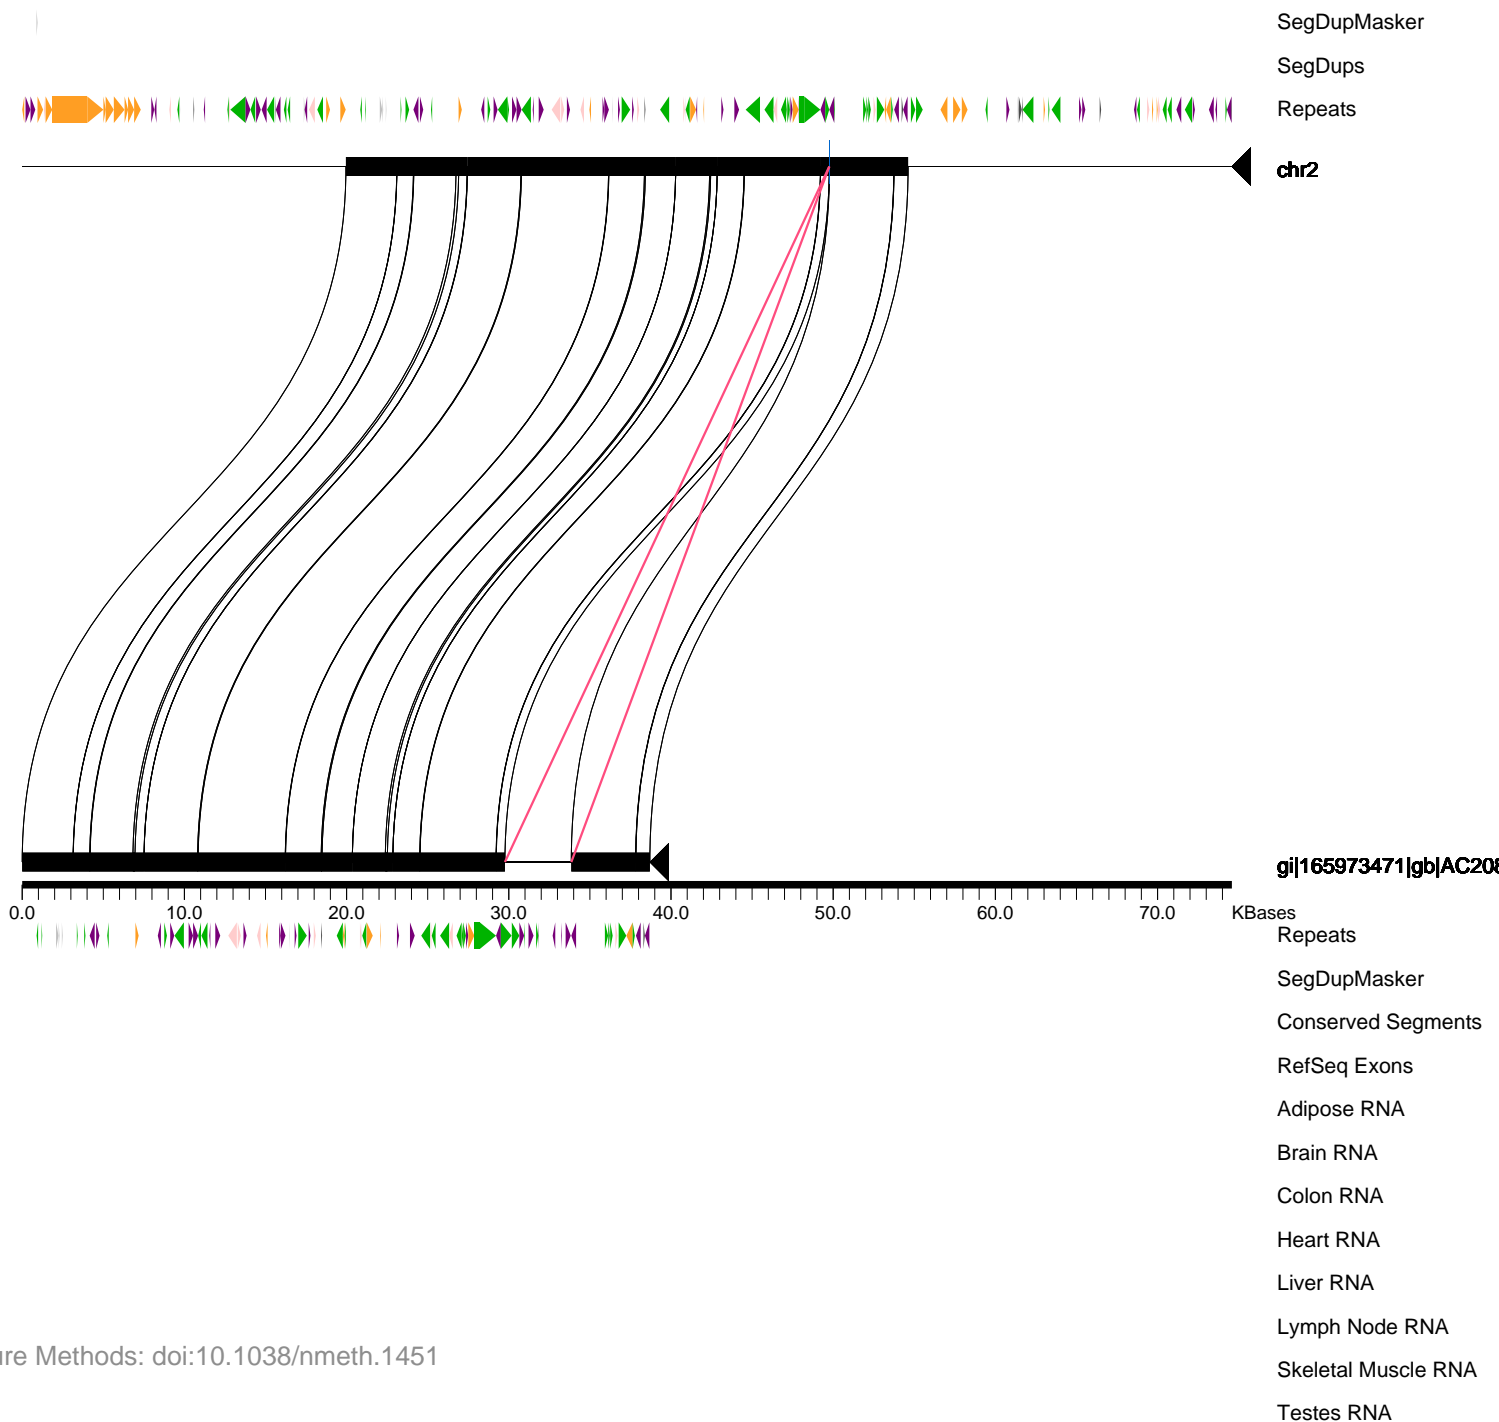

Clone file = AC208950.rc.fa

Insertion Size: 22557

Other Simple Repeat Low Complexity DNA LTR LINE SINE

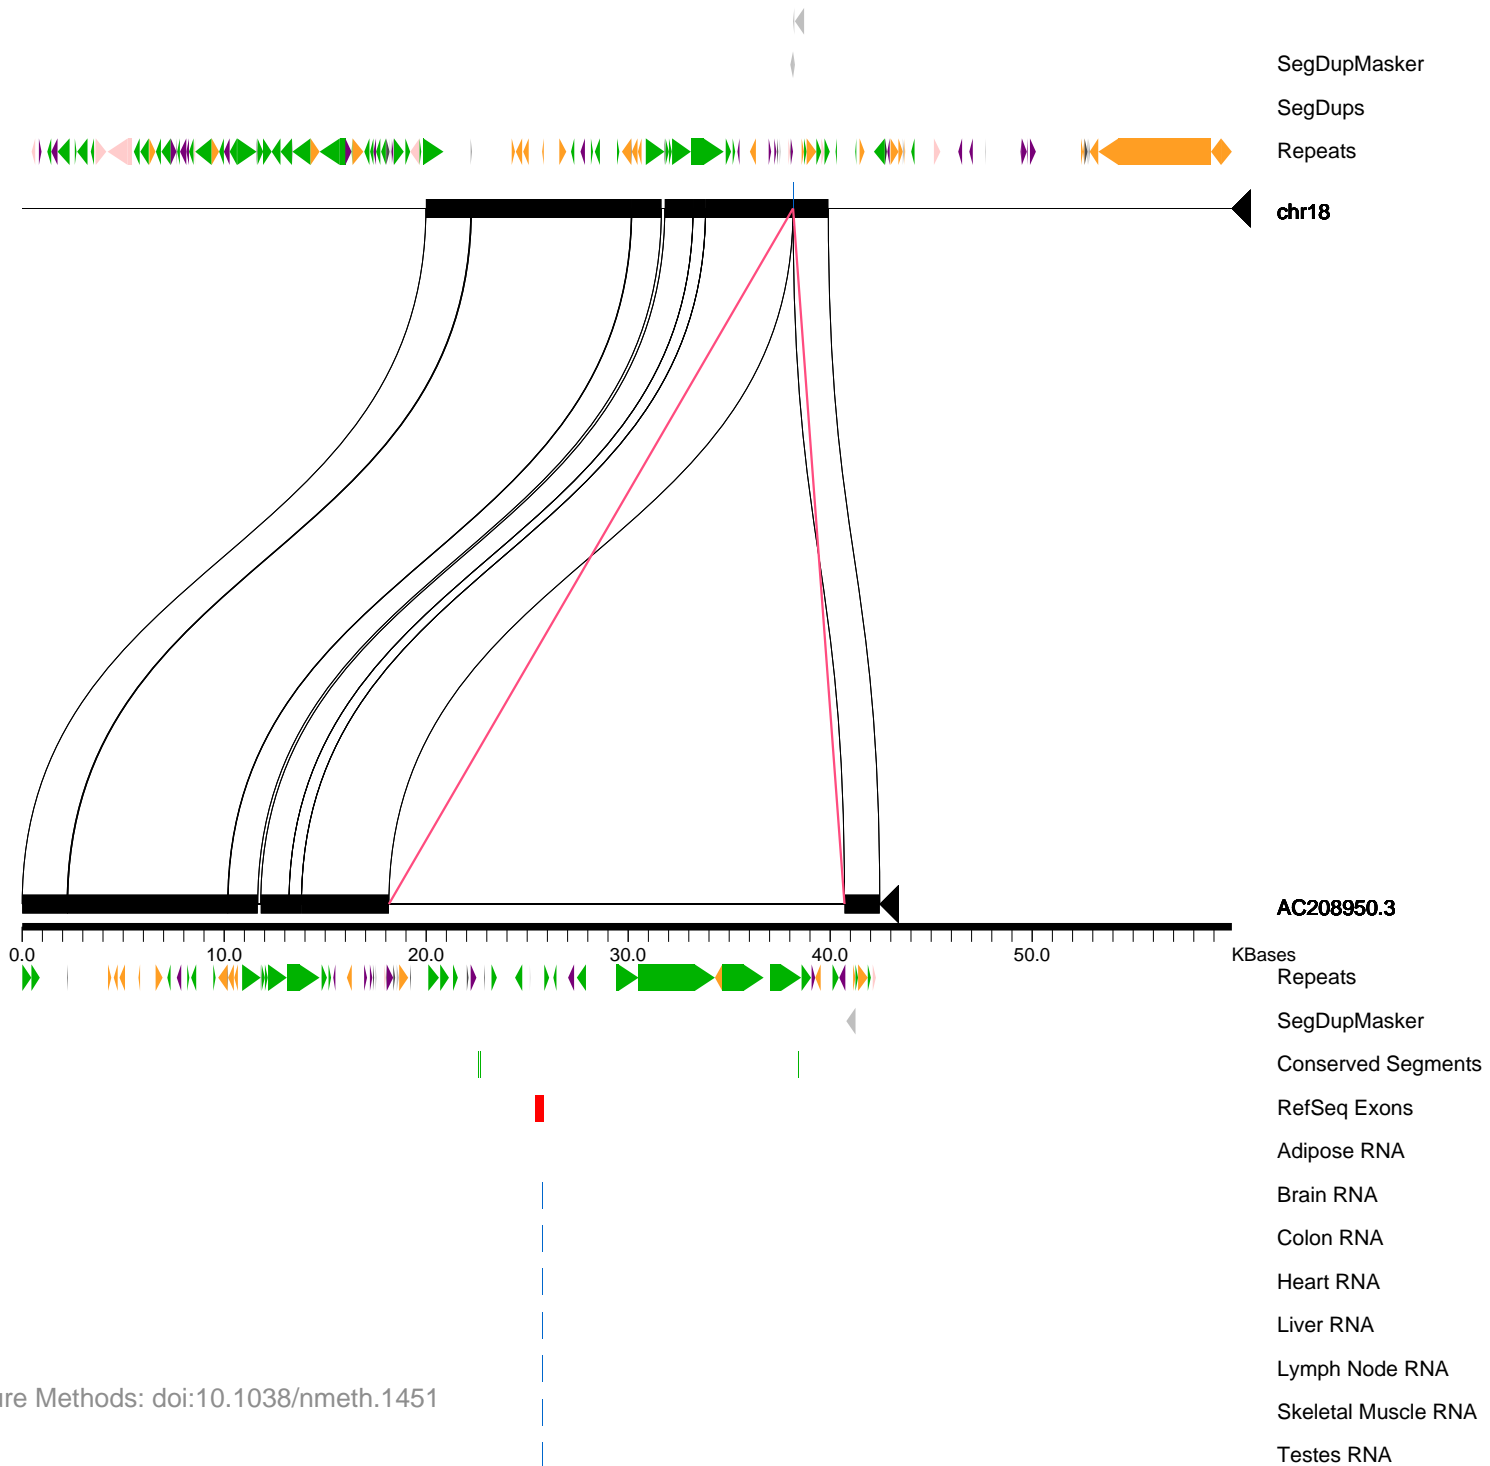



Clone file = AC209007.fa

Insertion Size: 7246

Other Simple Repeat Low Complexity DNA LTR LINE SINE

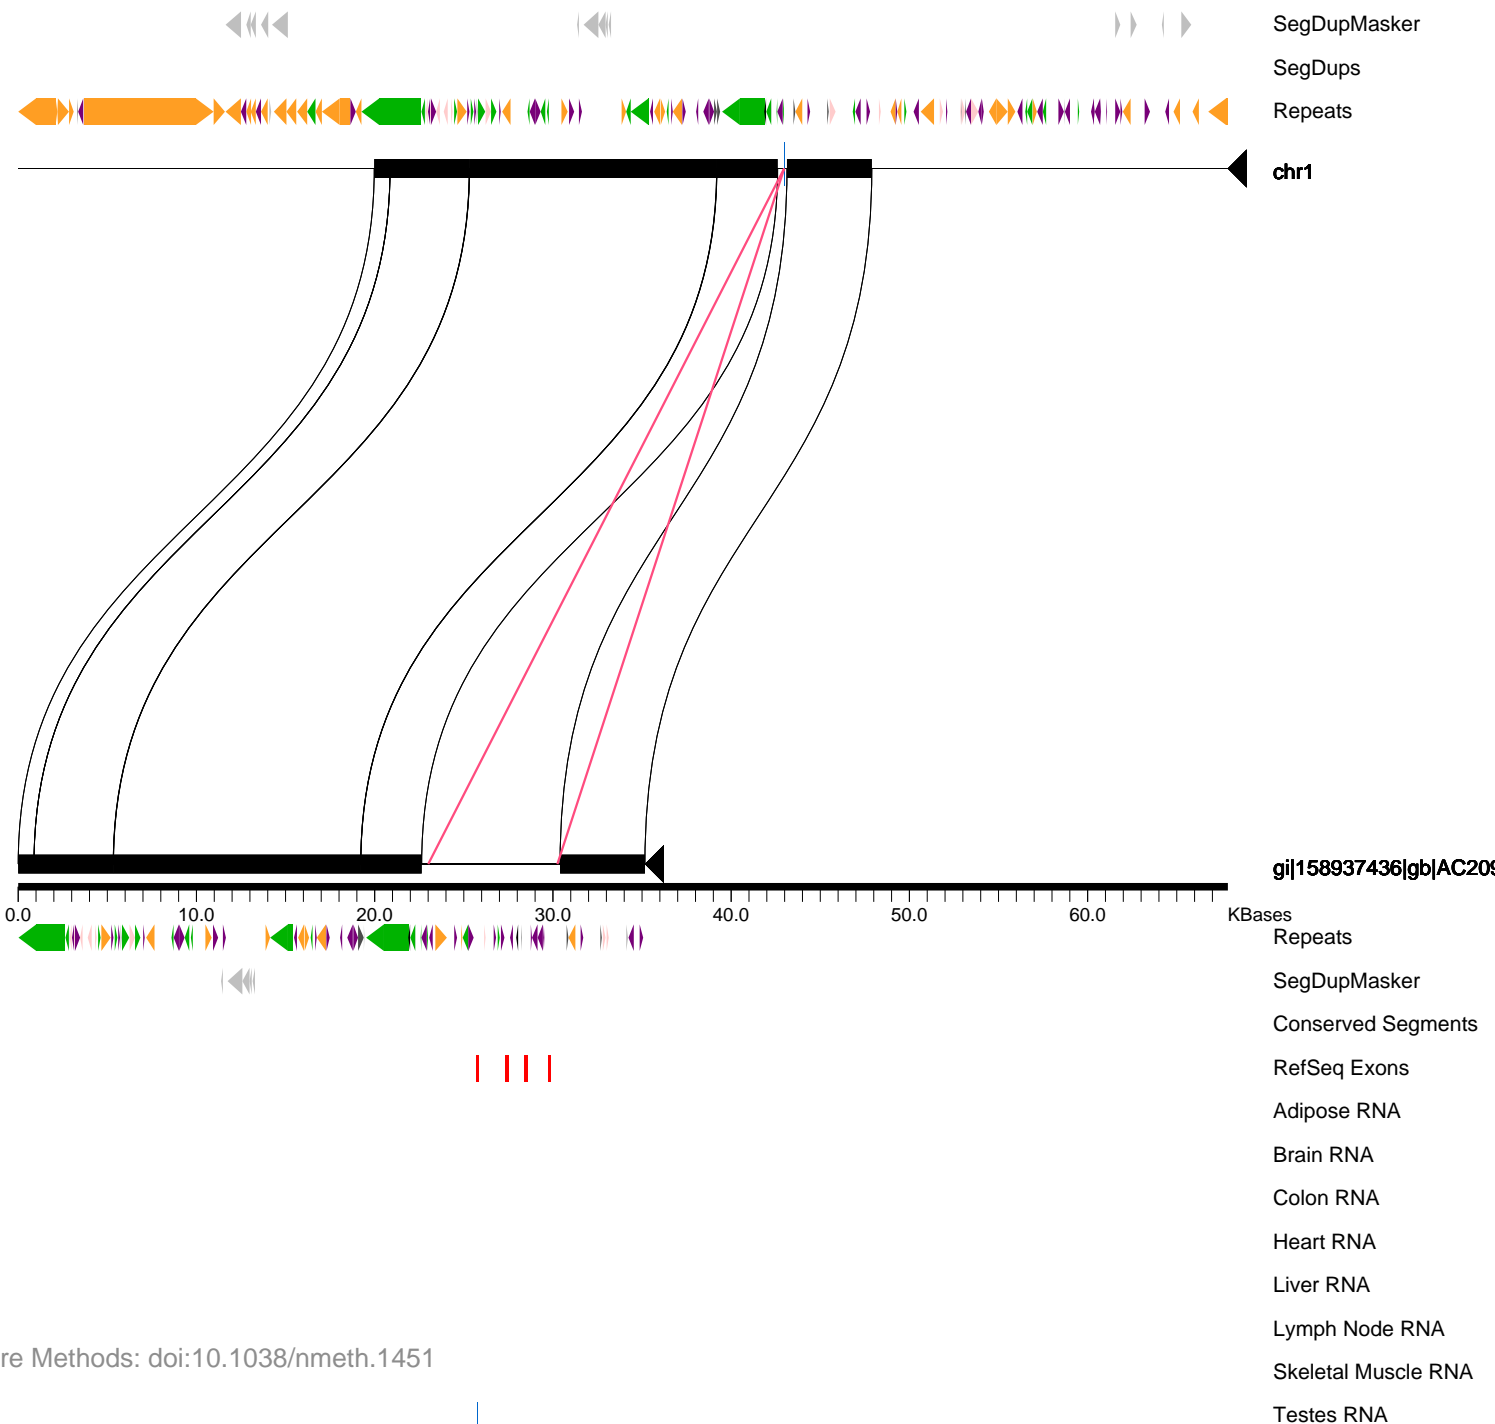

Clone file = AC209232.fa

Insertion Size: 7488

Other Simple Repeat Low Complexity DNA LTR LINE SINE

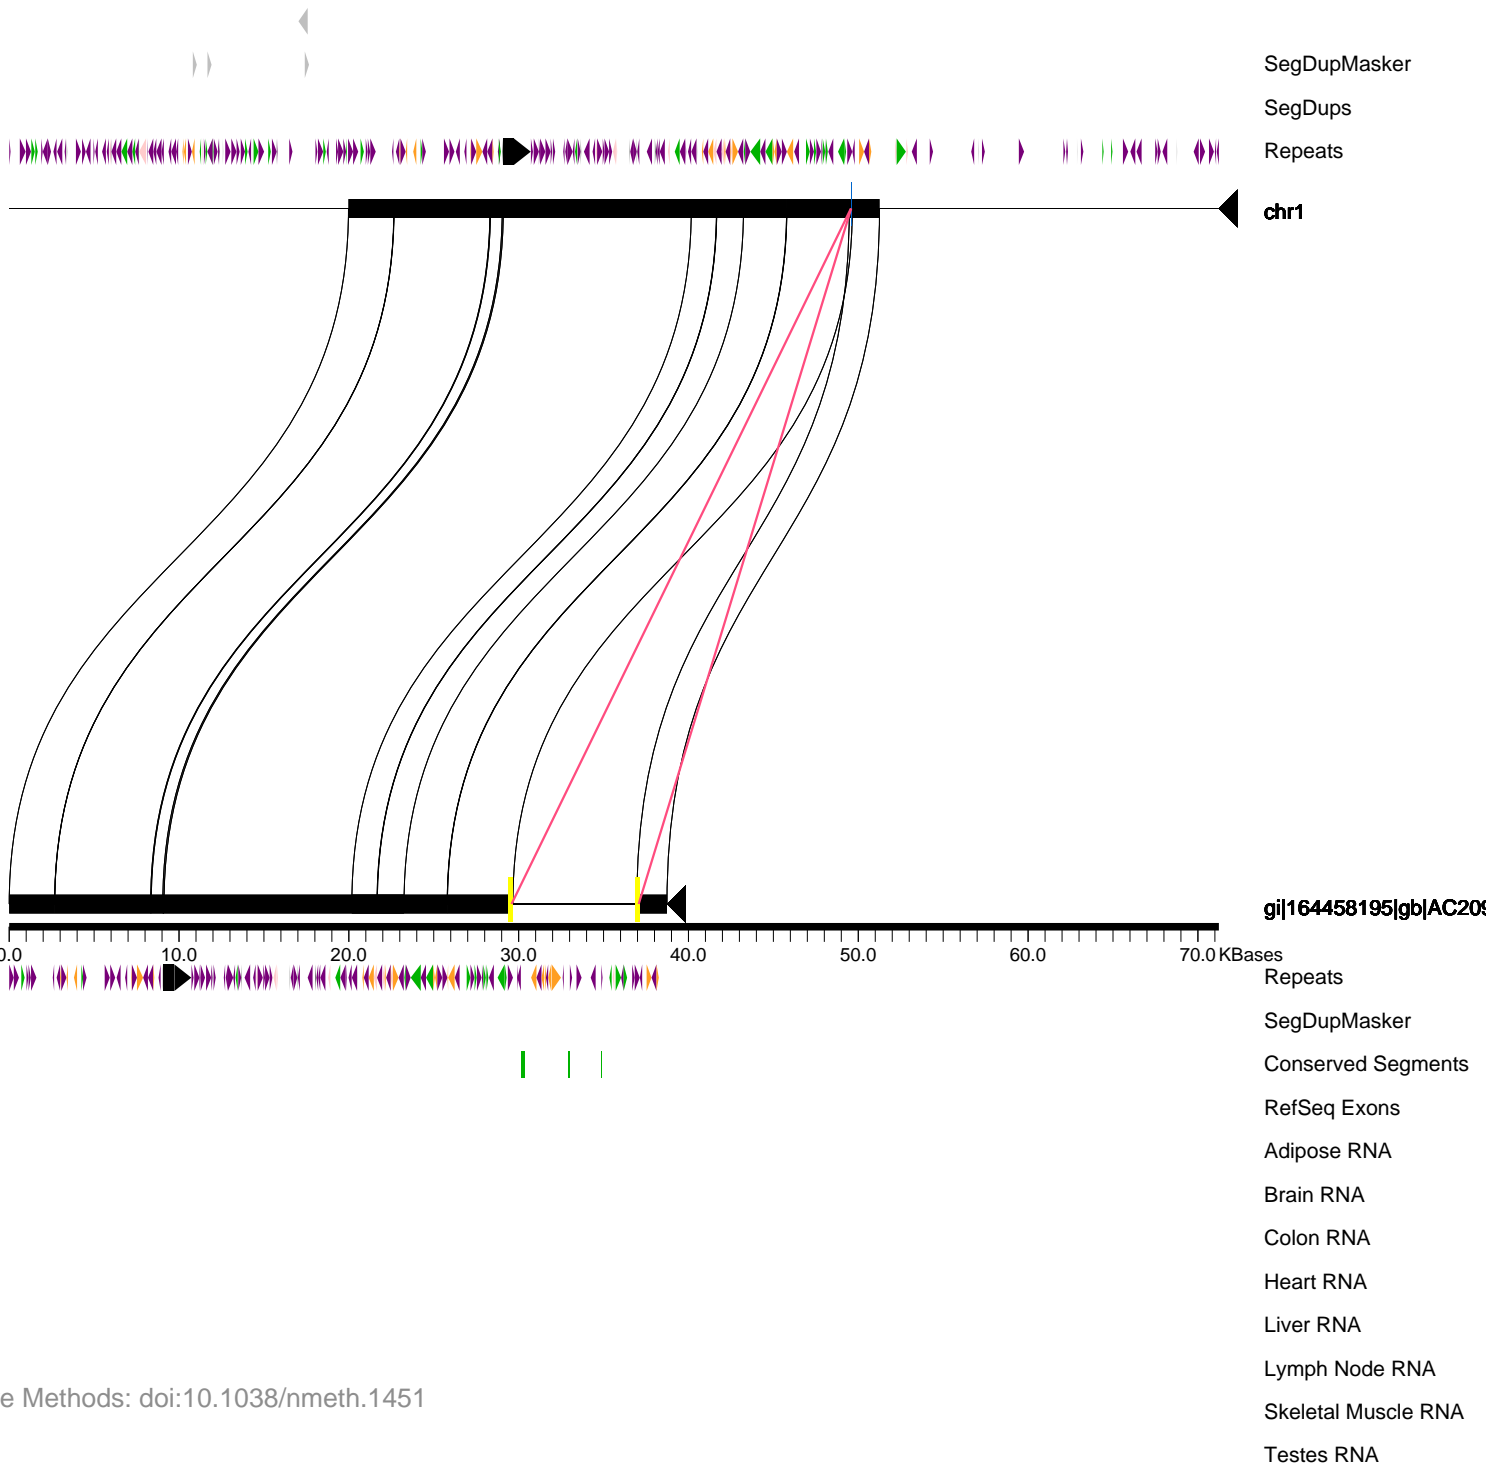

Clone file = AC209234.rc.fa

Insertion Size: 27841

Other Simple Repeat Low Complexity DNA LTR LINE SINE

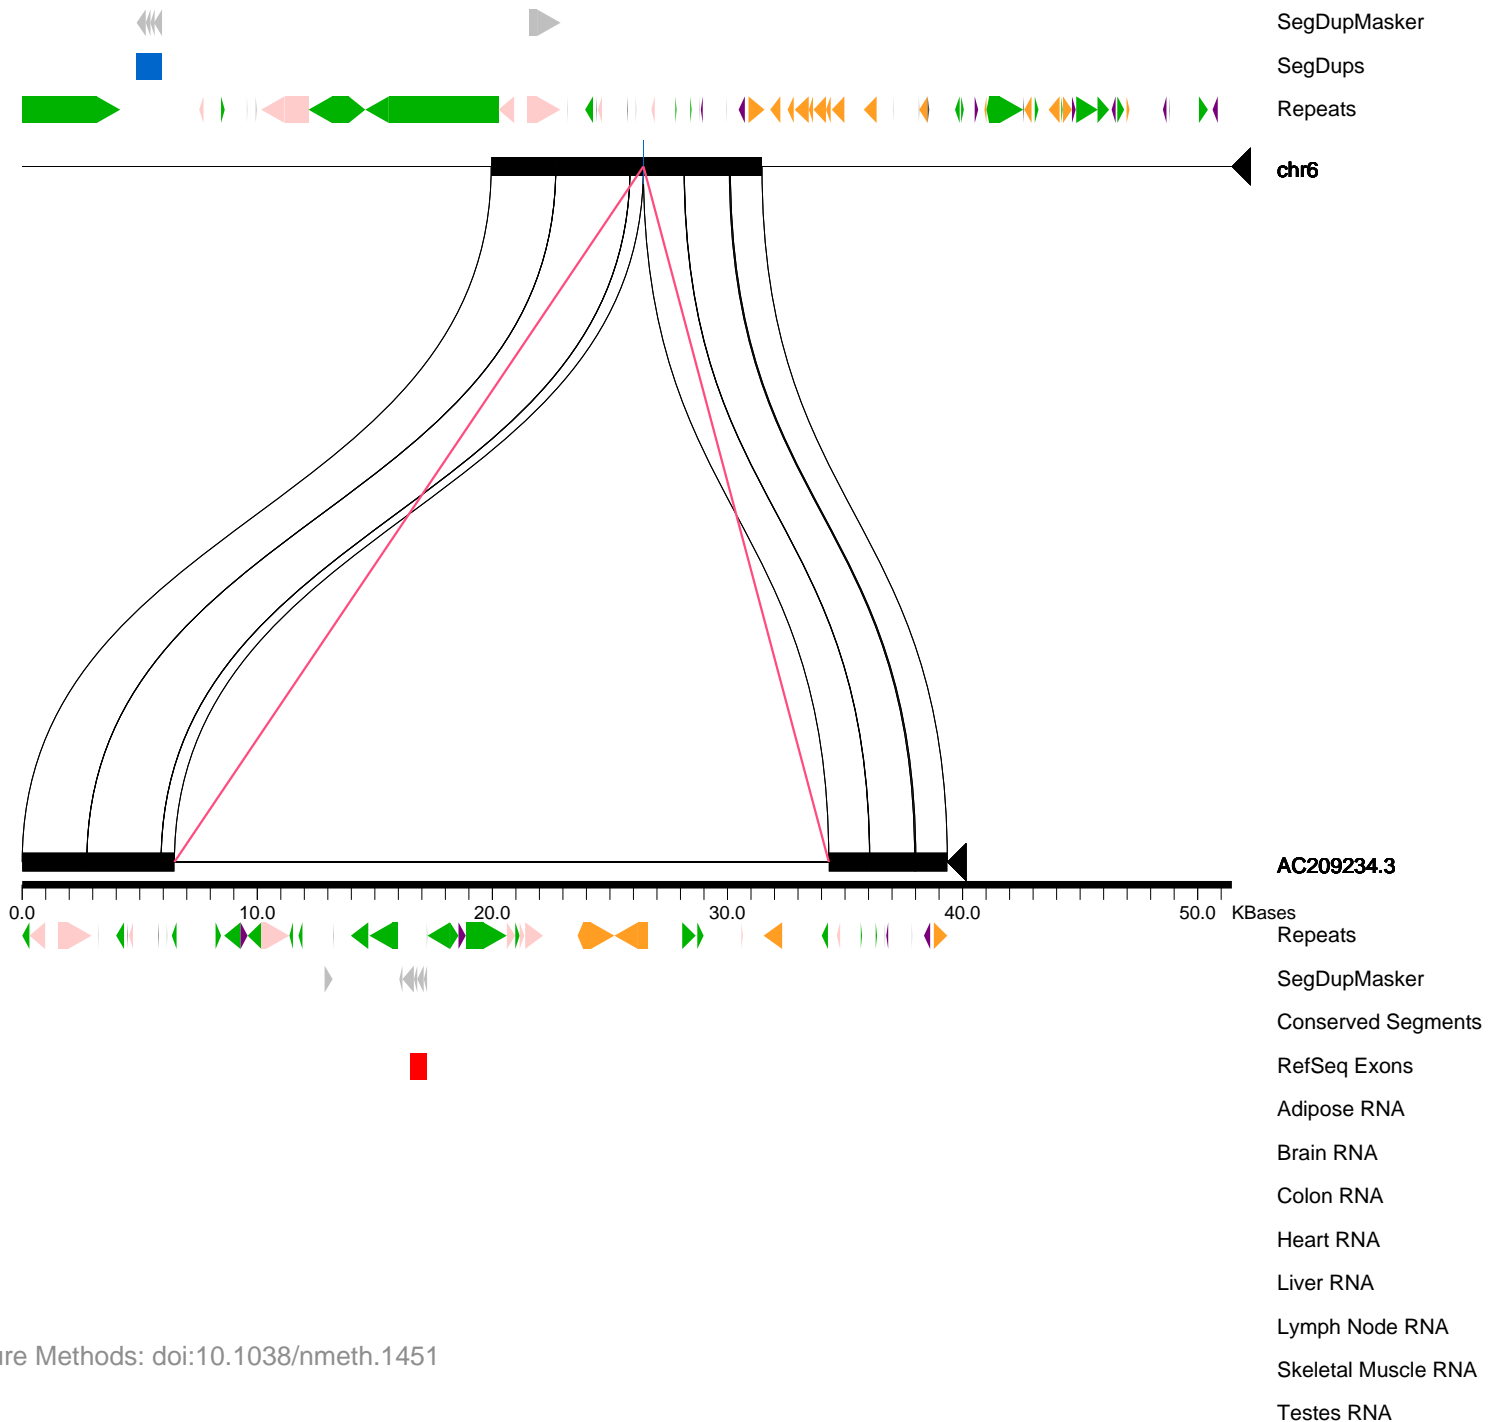

Clone file = AC209283.fa

Insertion Size: 9563

Other Simple Repeat Low Complexity DNA LTR LINE SINE

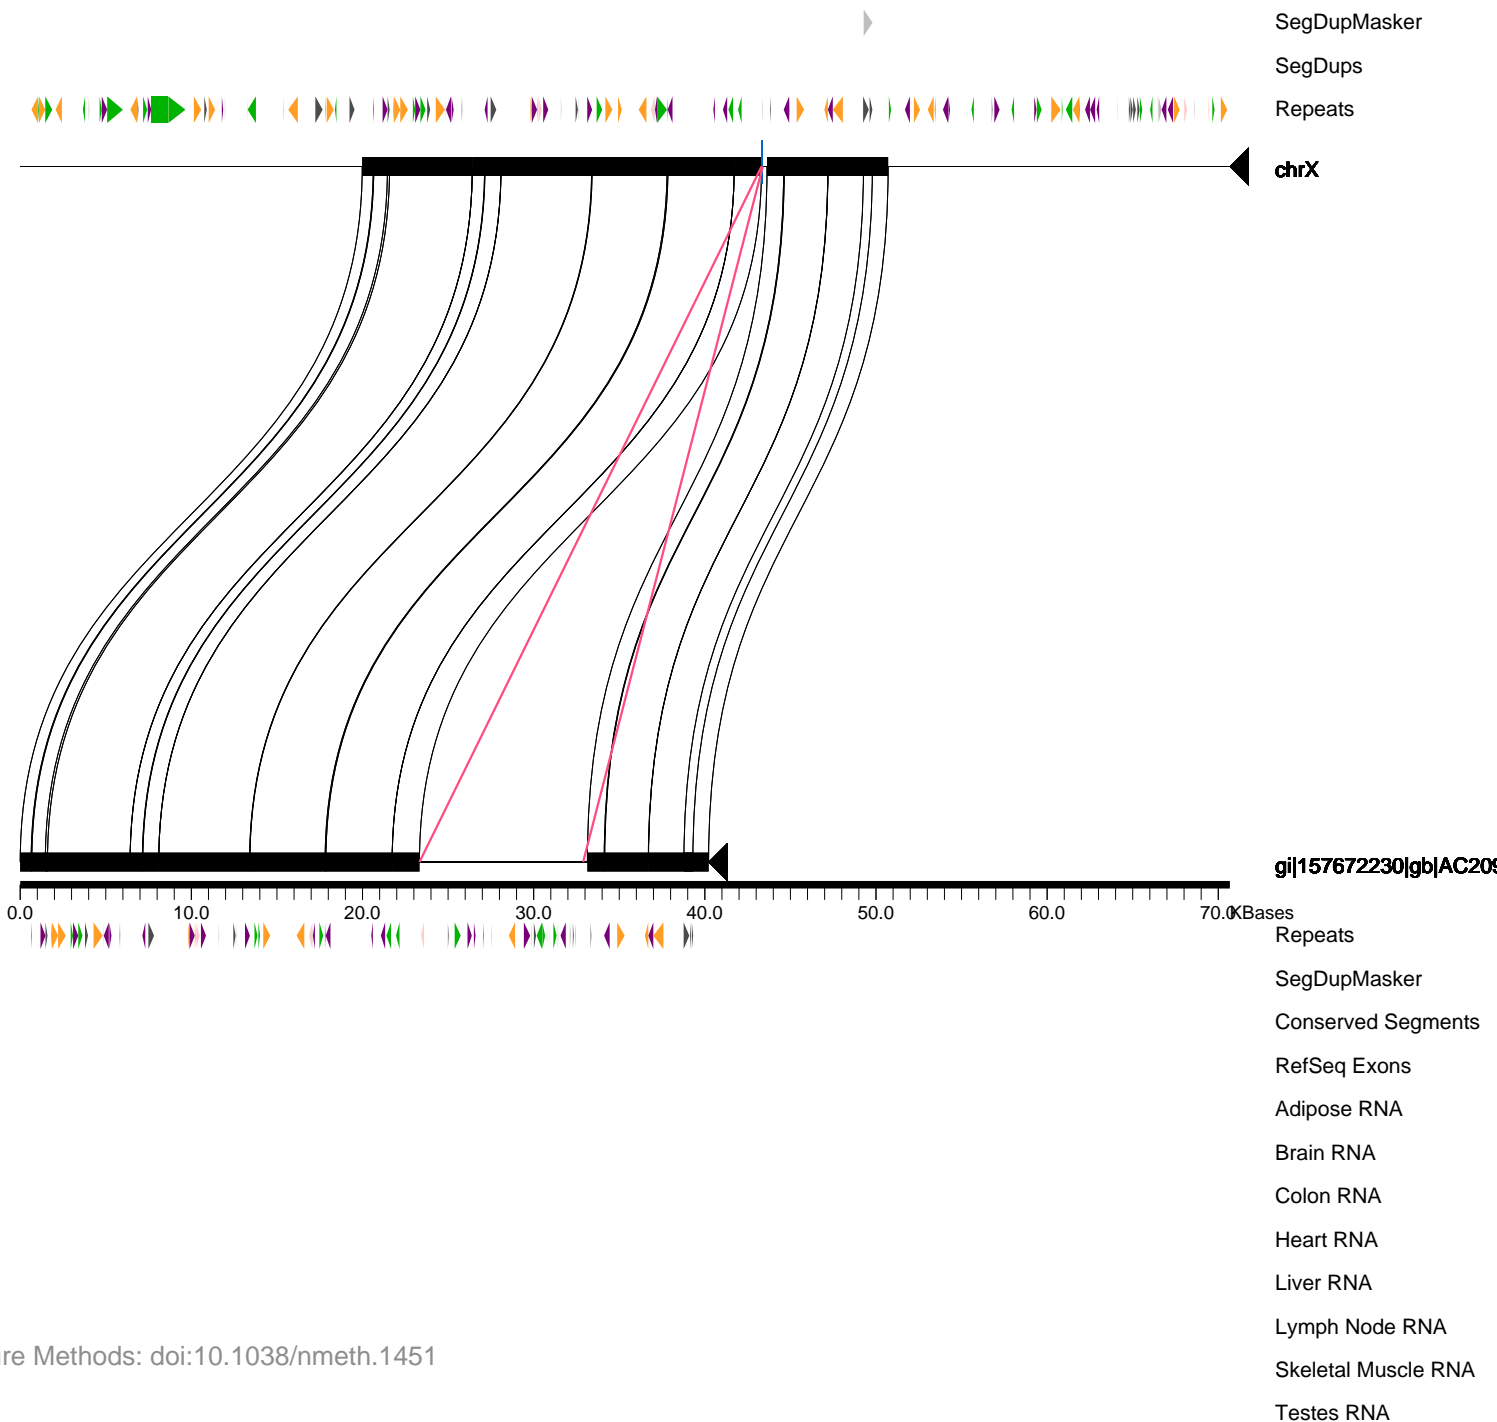

Clone file = AC209298.fa

Insertion Size: 12146

Other Simple Repeat Low Complexity DNA LTR LINE SINE

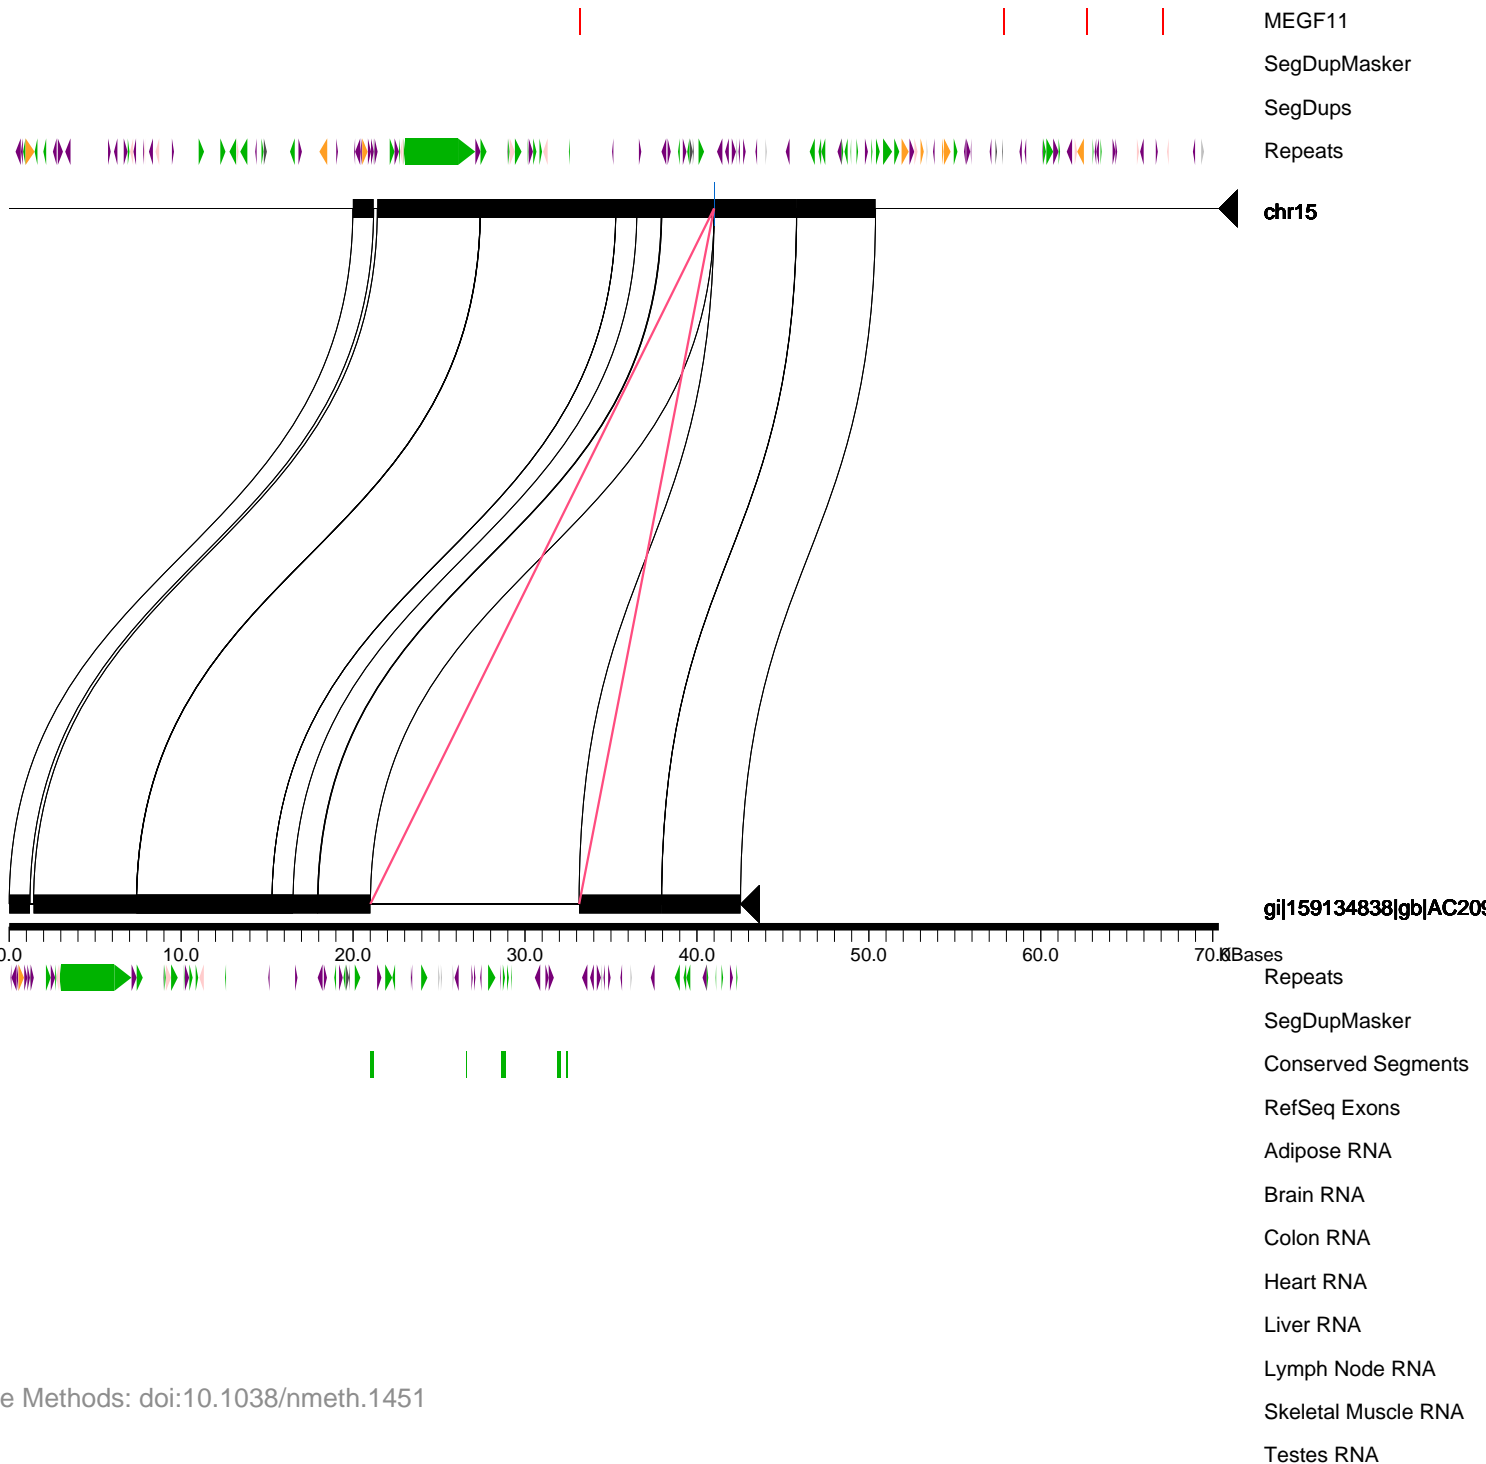

Clone file = AC209307.rc.fa

Insertion Size: 4150

Other Simple Repeat Low Complexity DNA LTR LINE SINE

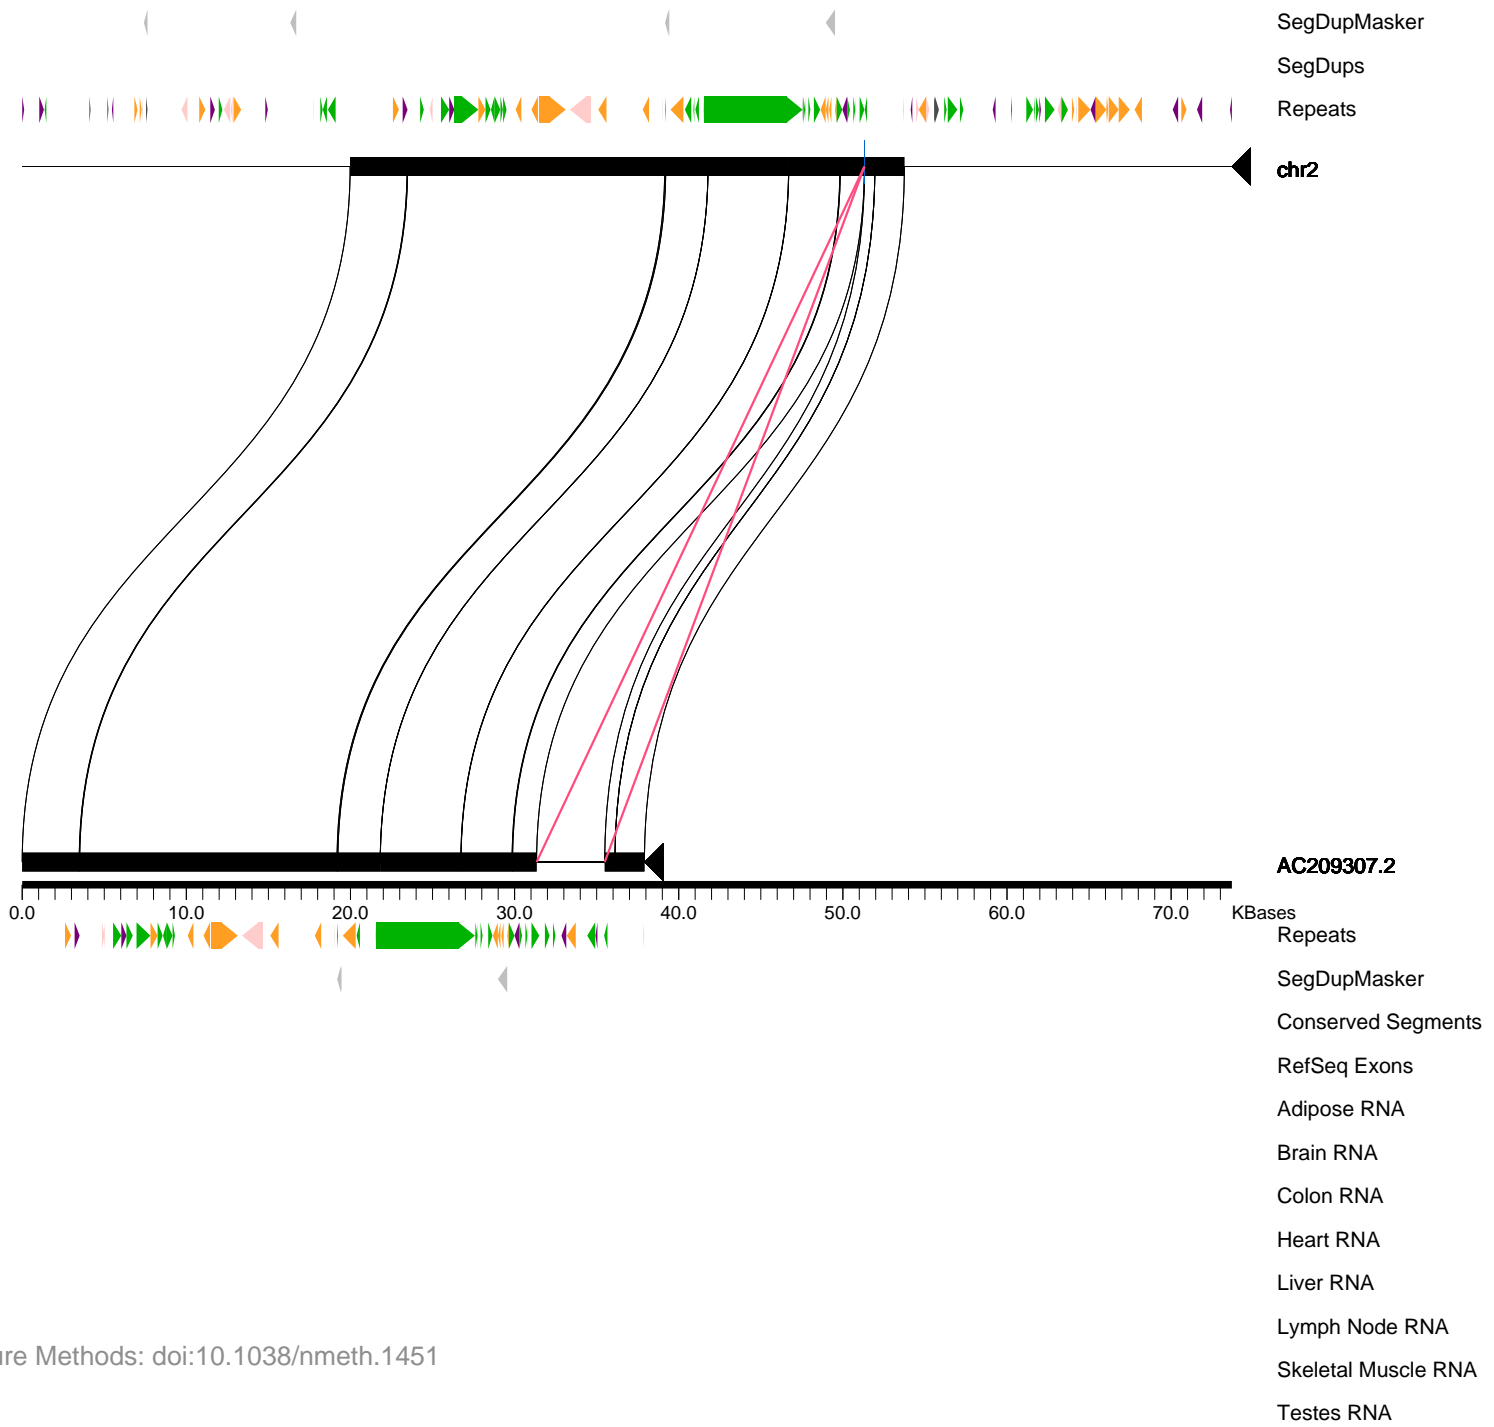

Clone file = AC209310.rc.fa

Insertion Size: 4158

Other Simple Repeat Low Complexity DNA LTR LINE SINE

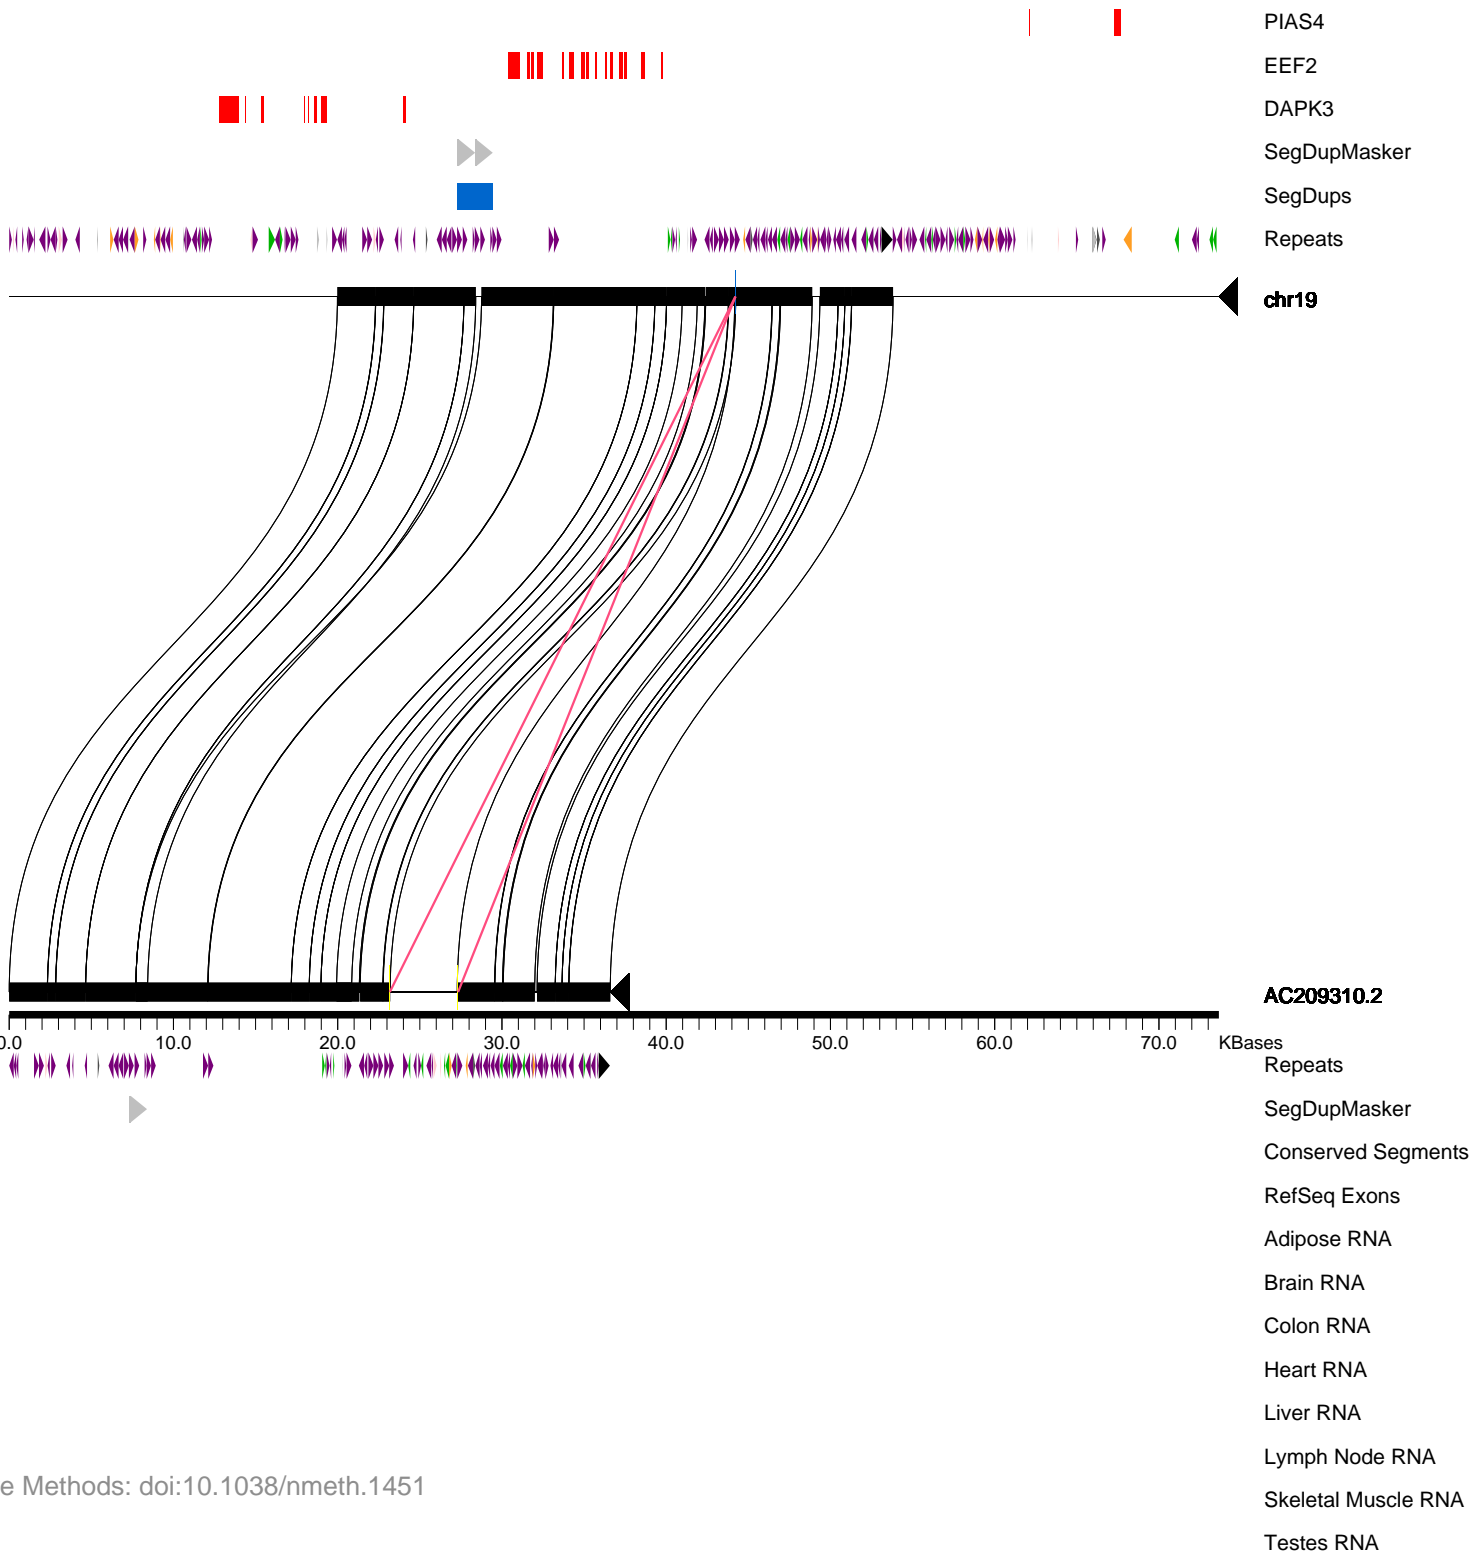

Clone file = AC209420.fa

Insertion Size: 10243

Other Simple Repeat Low Complexity DNA LTR LINE SINE

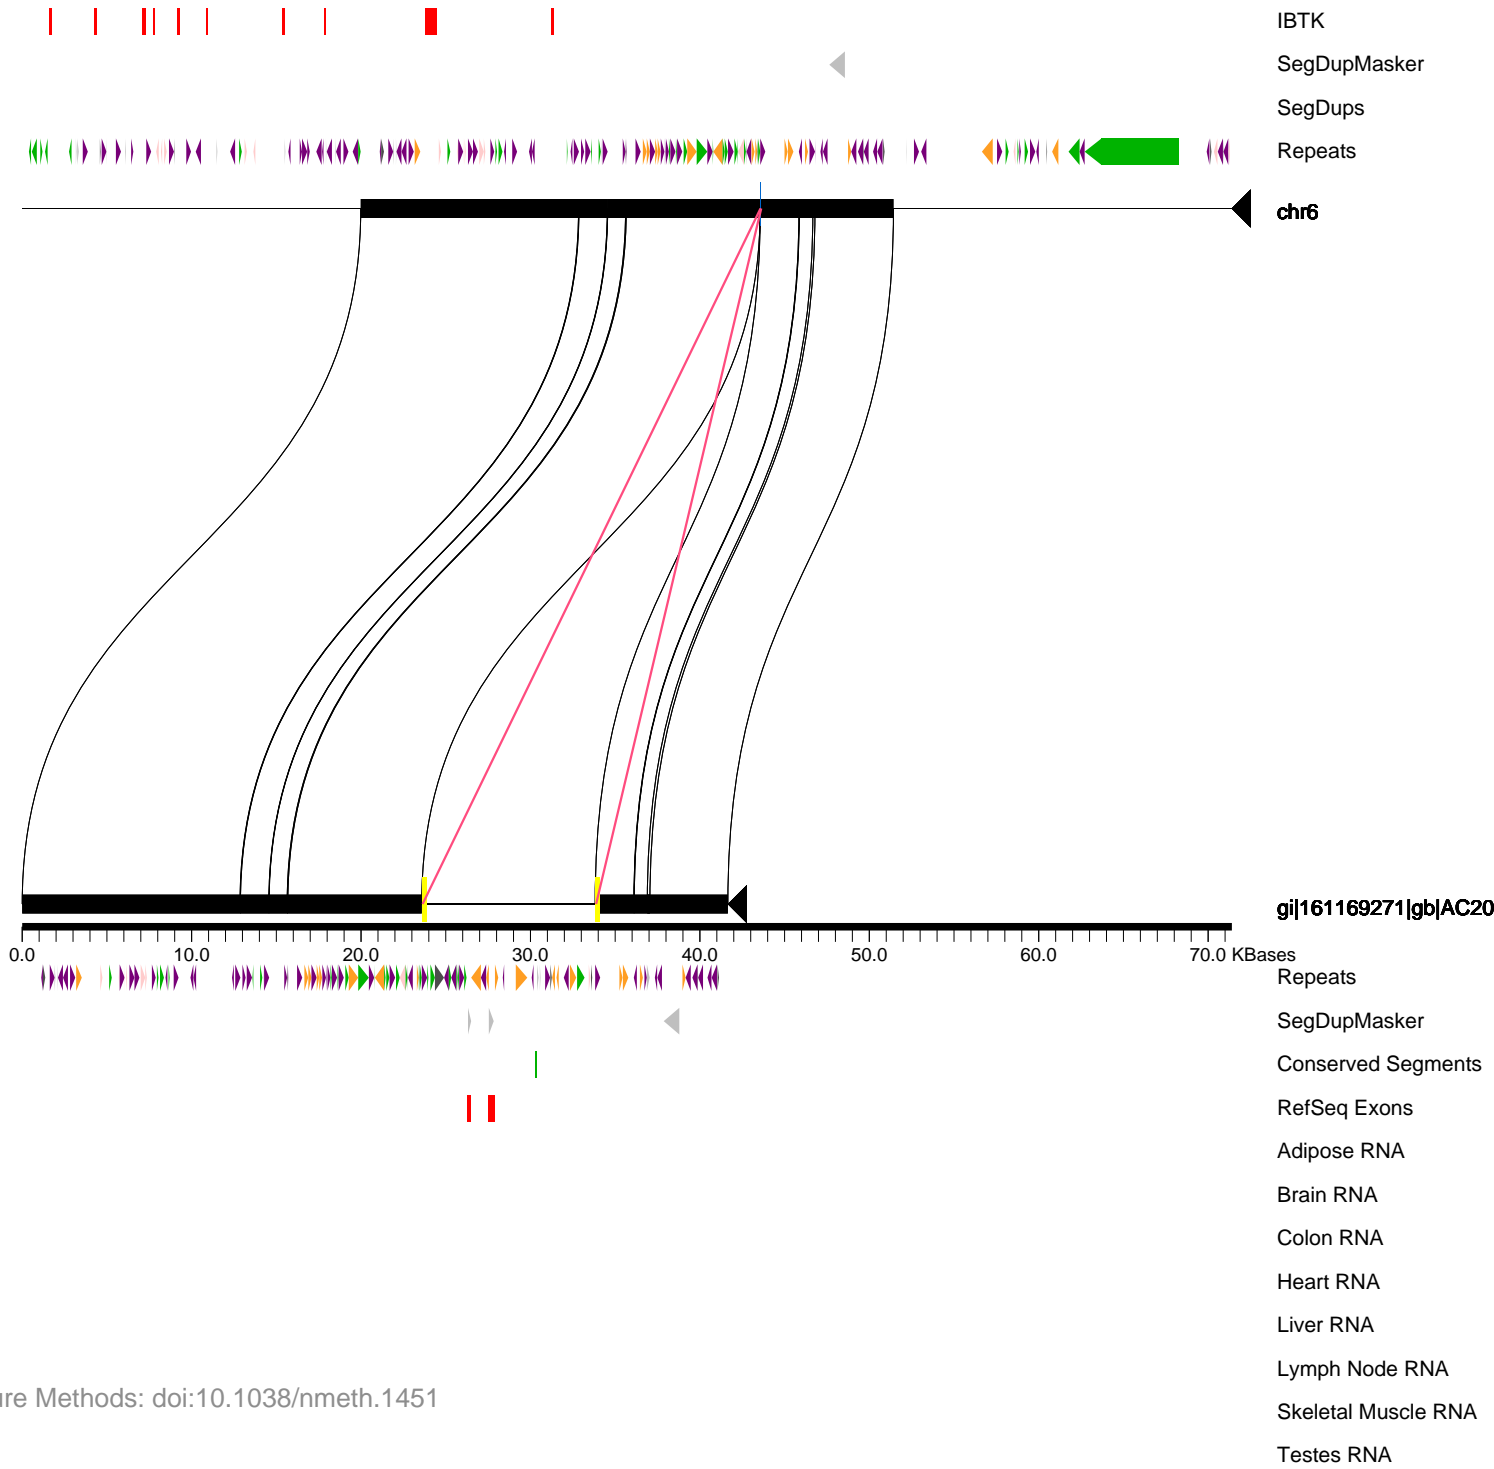



Clone file = AC209546.fa

Insertion Size: 11929

Other Simple Repeat Low Complexity DNA LTR LINE SINE

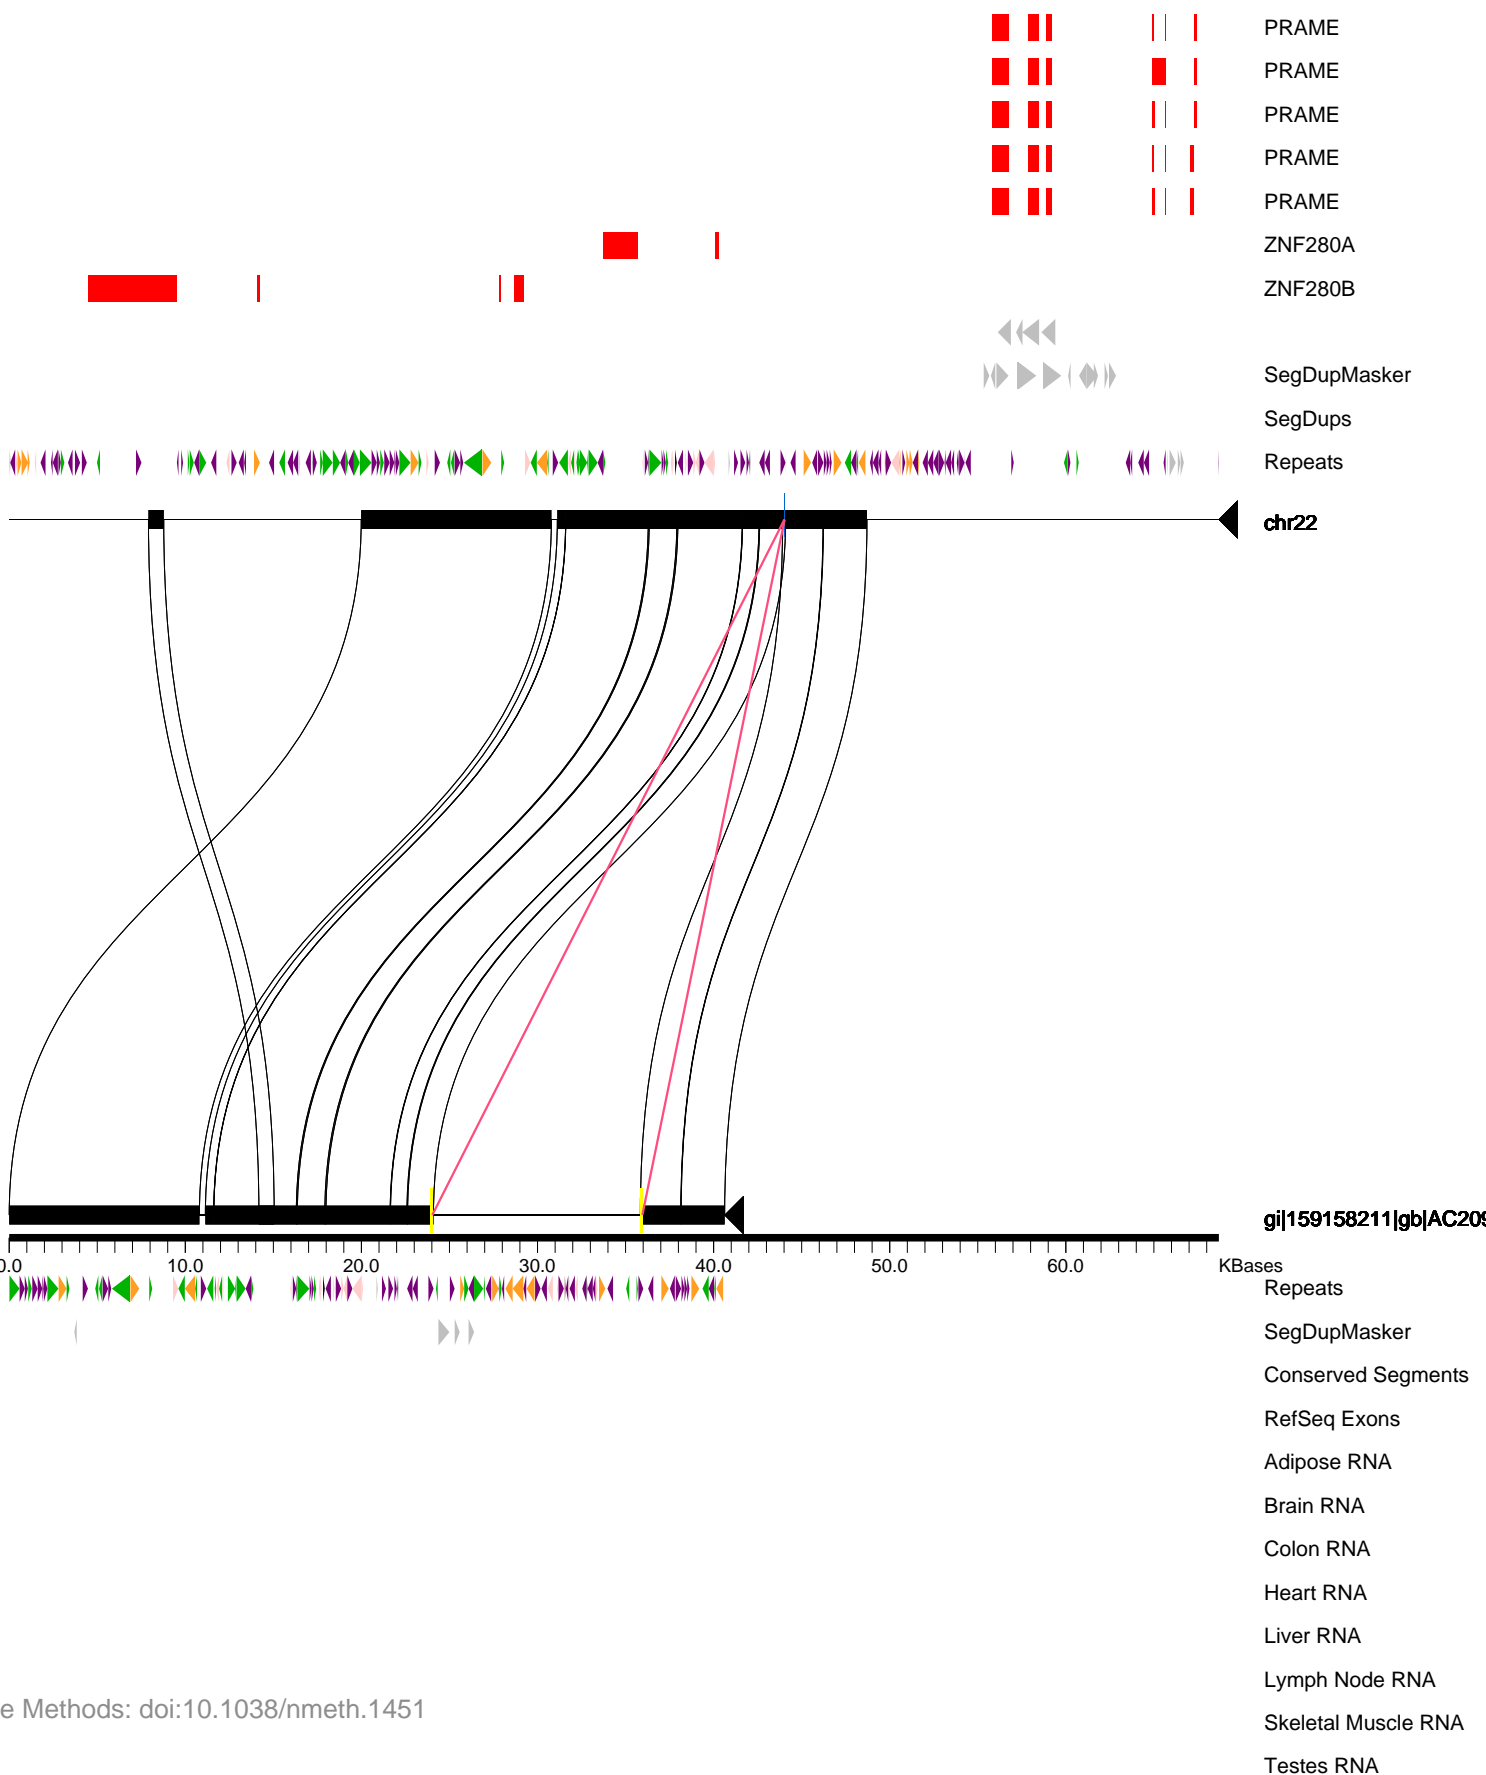

Clone file = AC209551.rc.fa

Insertion Size: 10658

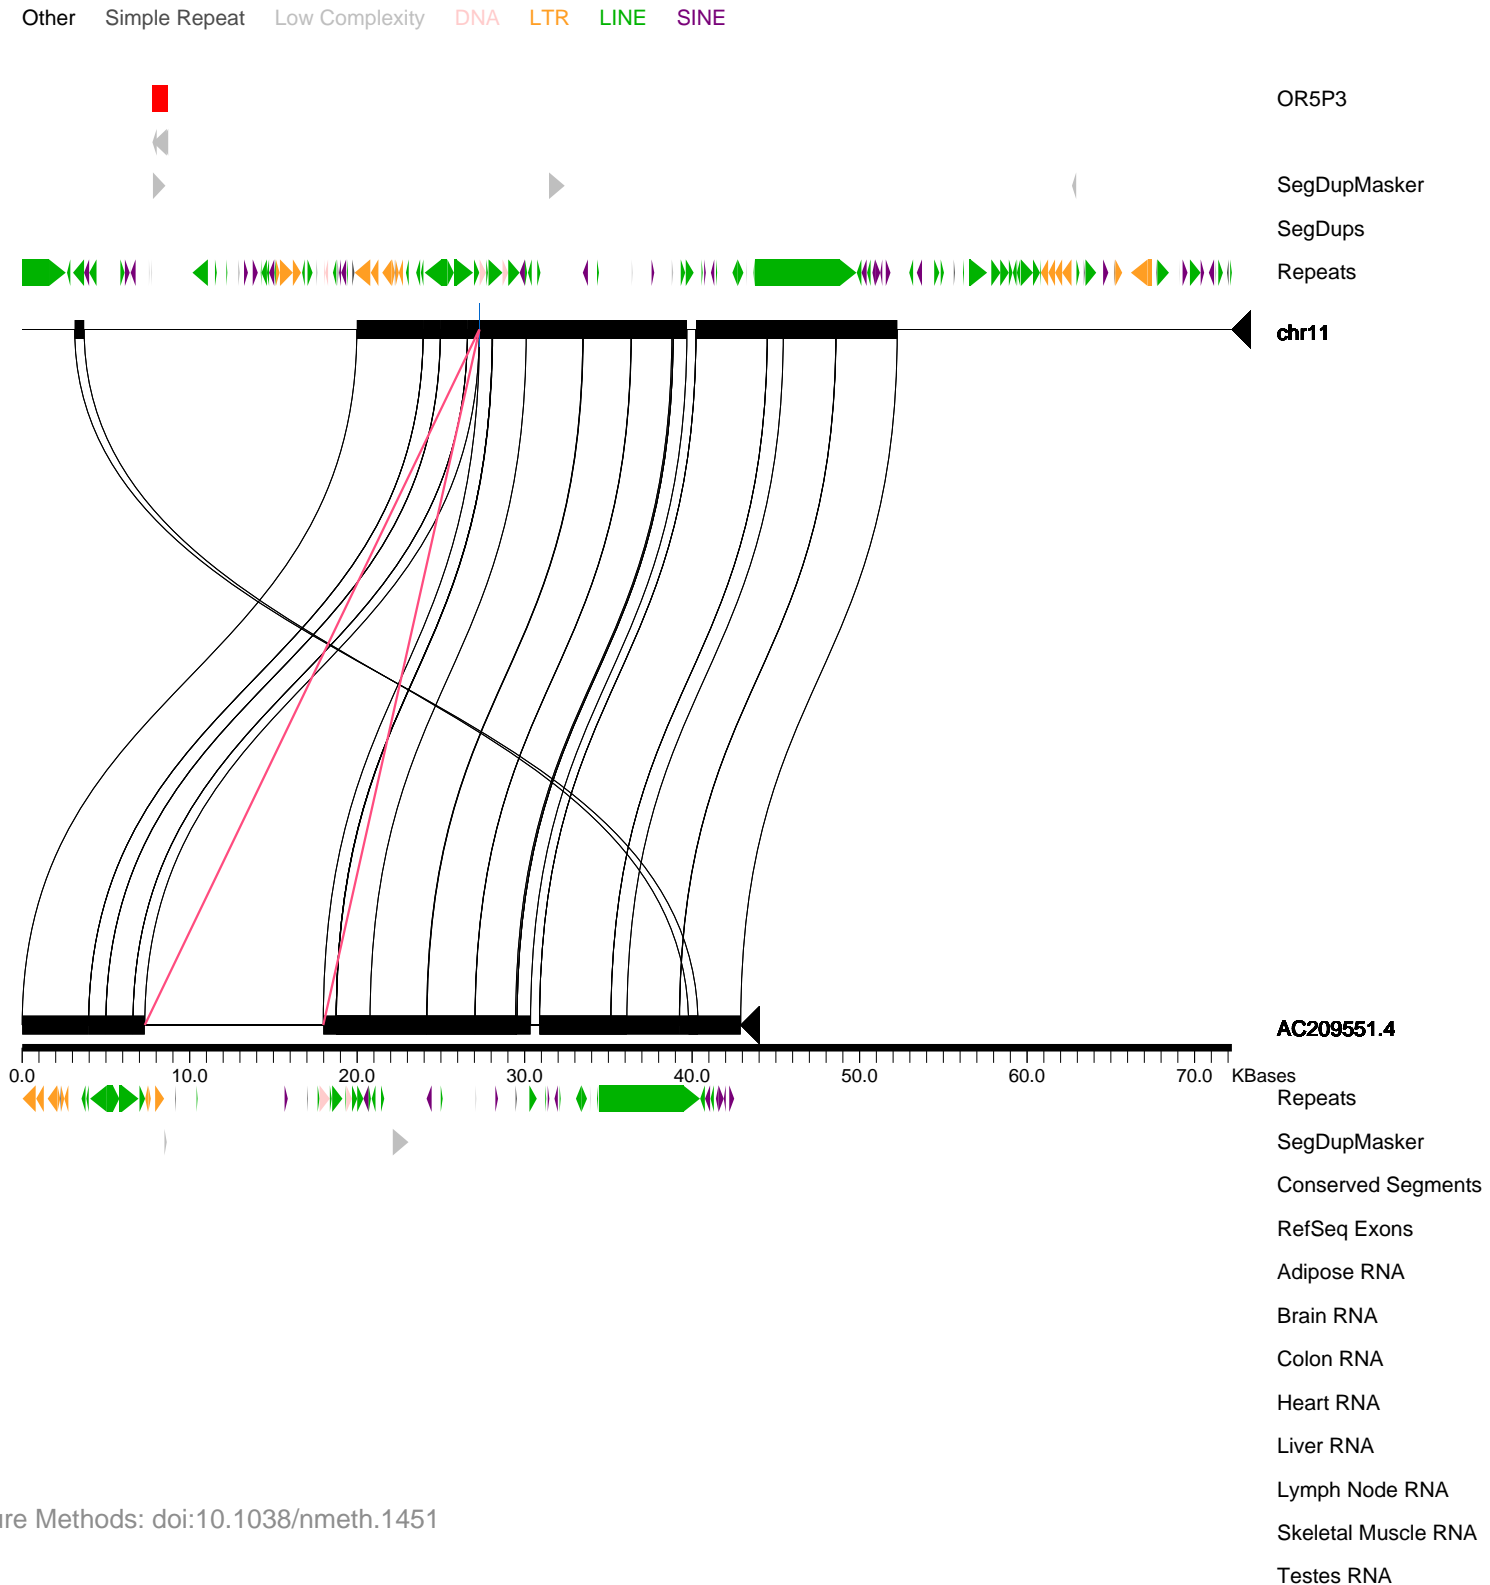

Clone file = AC209618.fa

Insertion Size: 3151

Other Simple Repeat Low Complexity DNA LTR LINE SINE

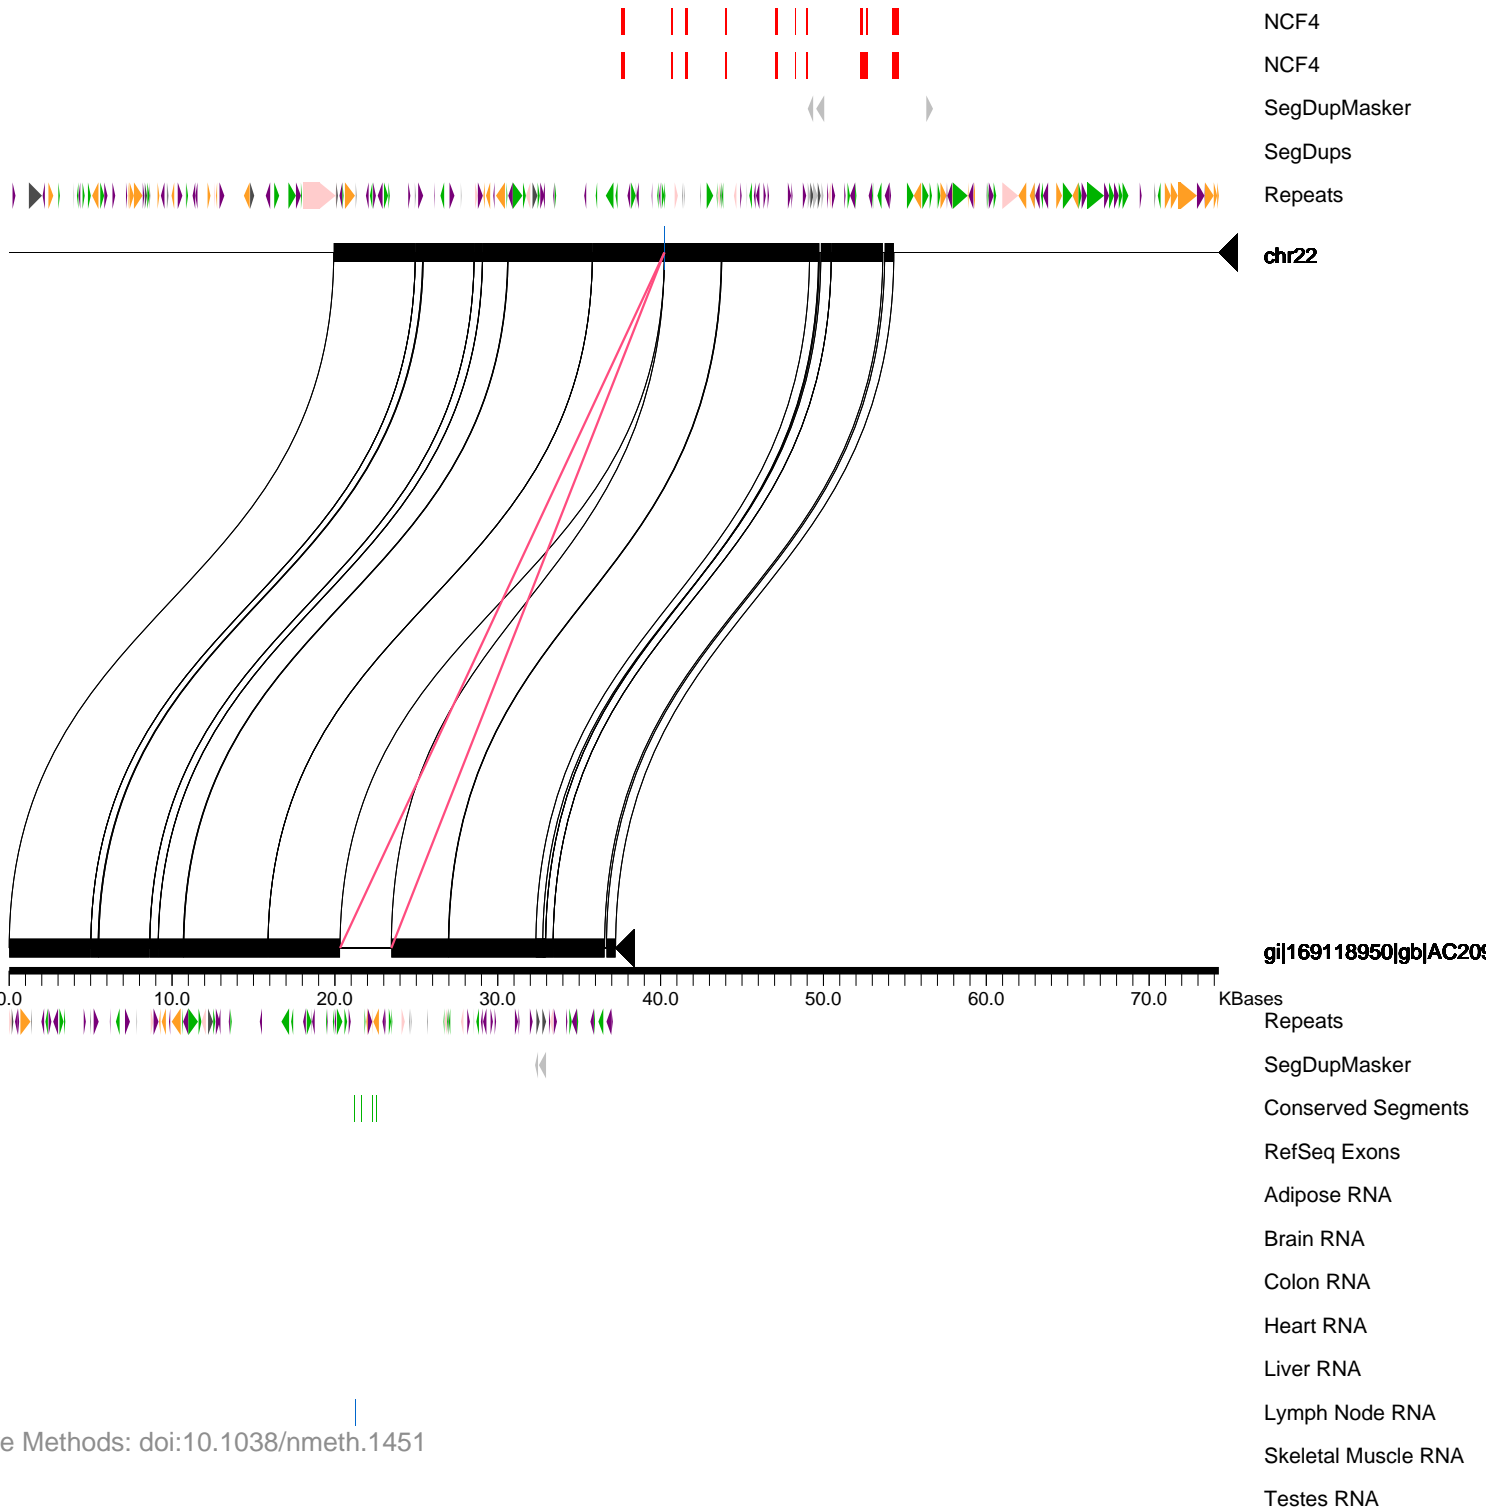

Clone file = AC210437.rc.fa

Insertion Size: 7192

Other Simple Repeat Low Complexity DNA LTR LINE SINE

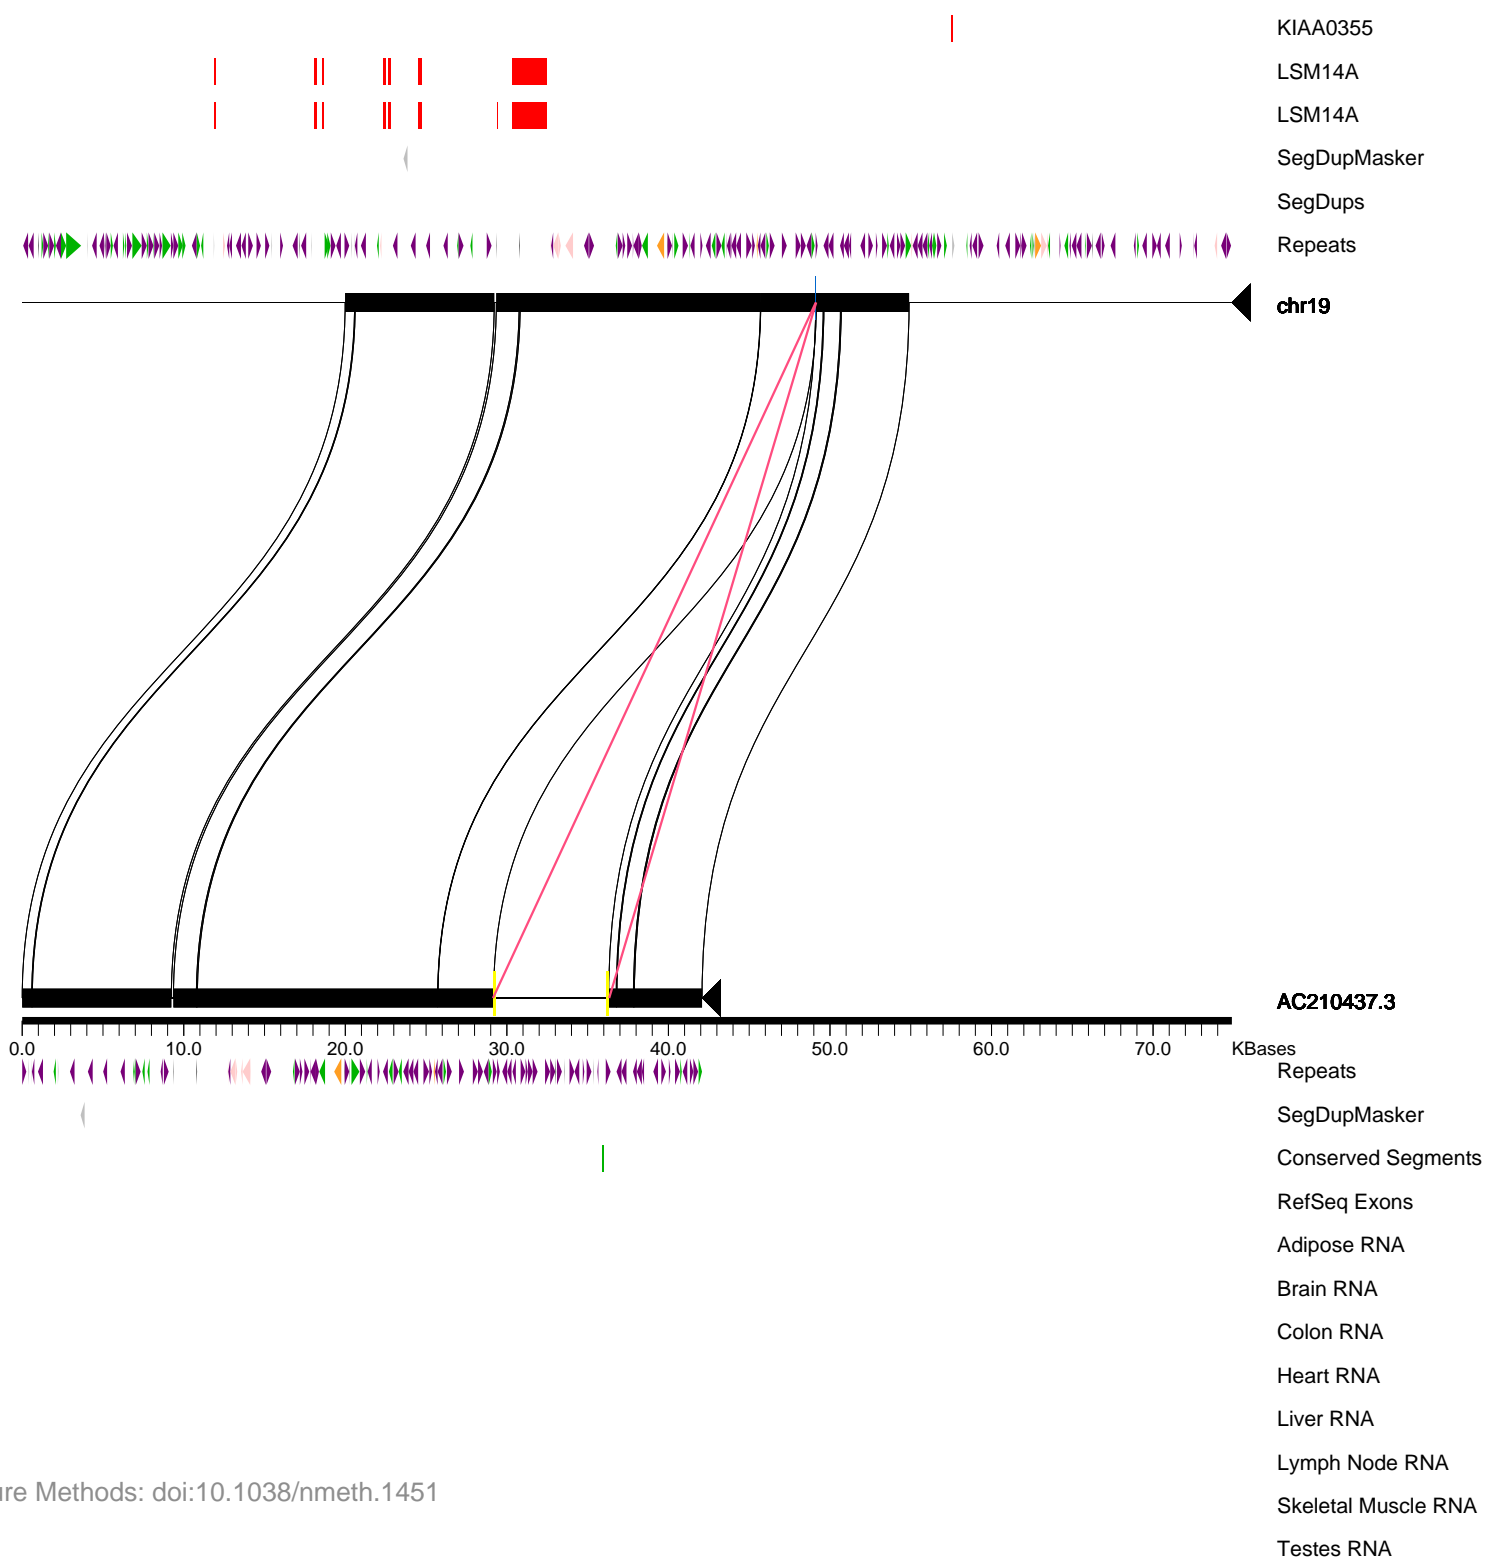

Clone file = AC210438.rc.fa

Insertion Size: 6530

Other Simple Repeat Low Complexity DNA LTR LINE SINE

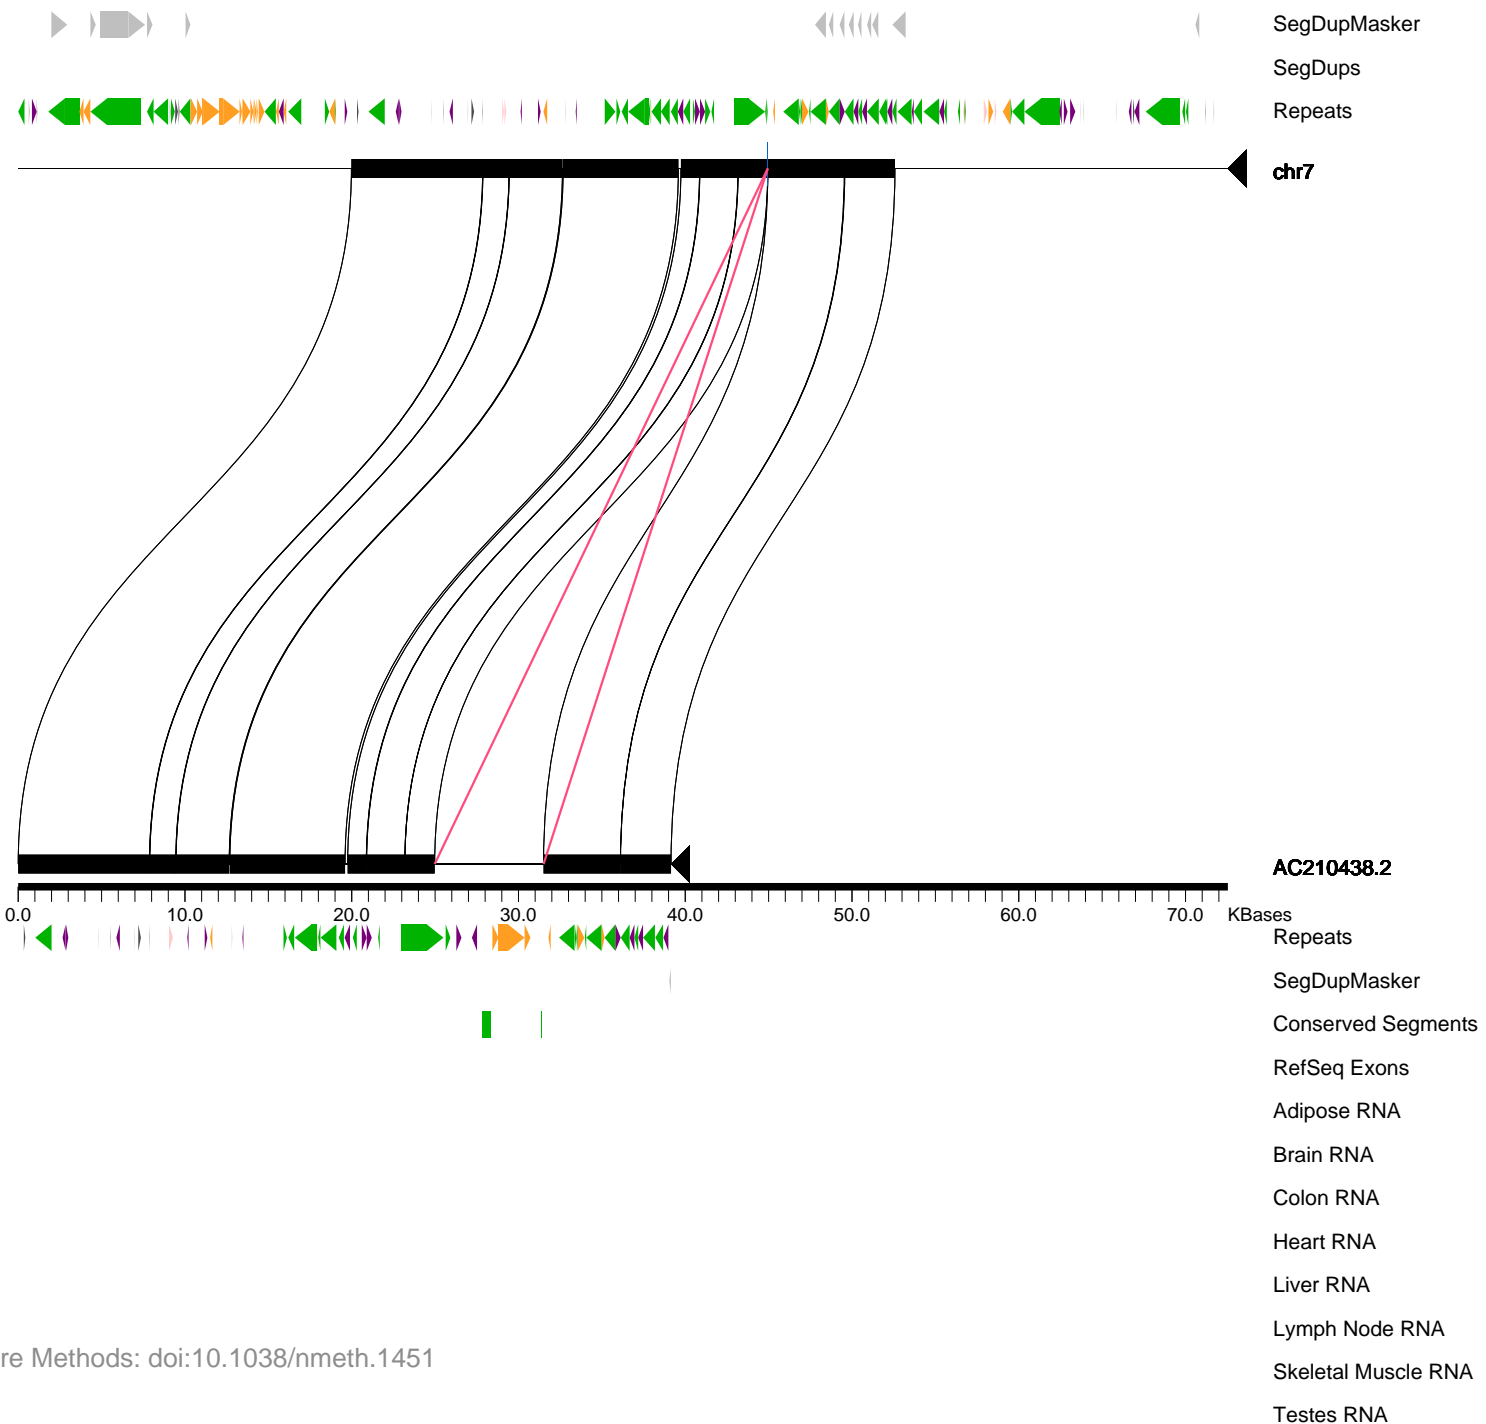

Clone file = AC210544.rc.fa

Insertion Size: 5805

Other Simple Repeat Low Complexity DNA LTR LINE SINE

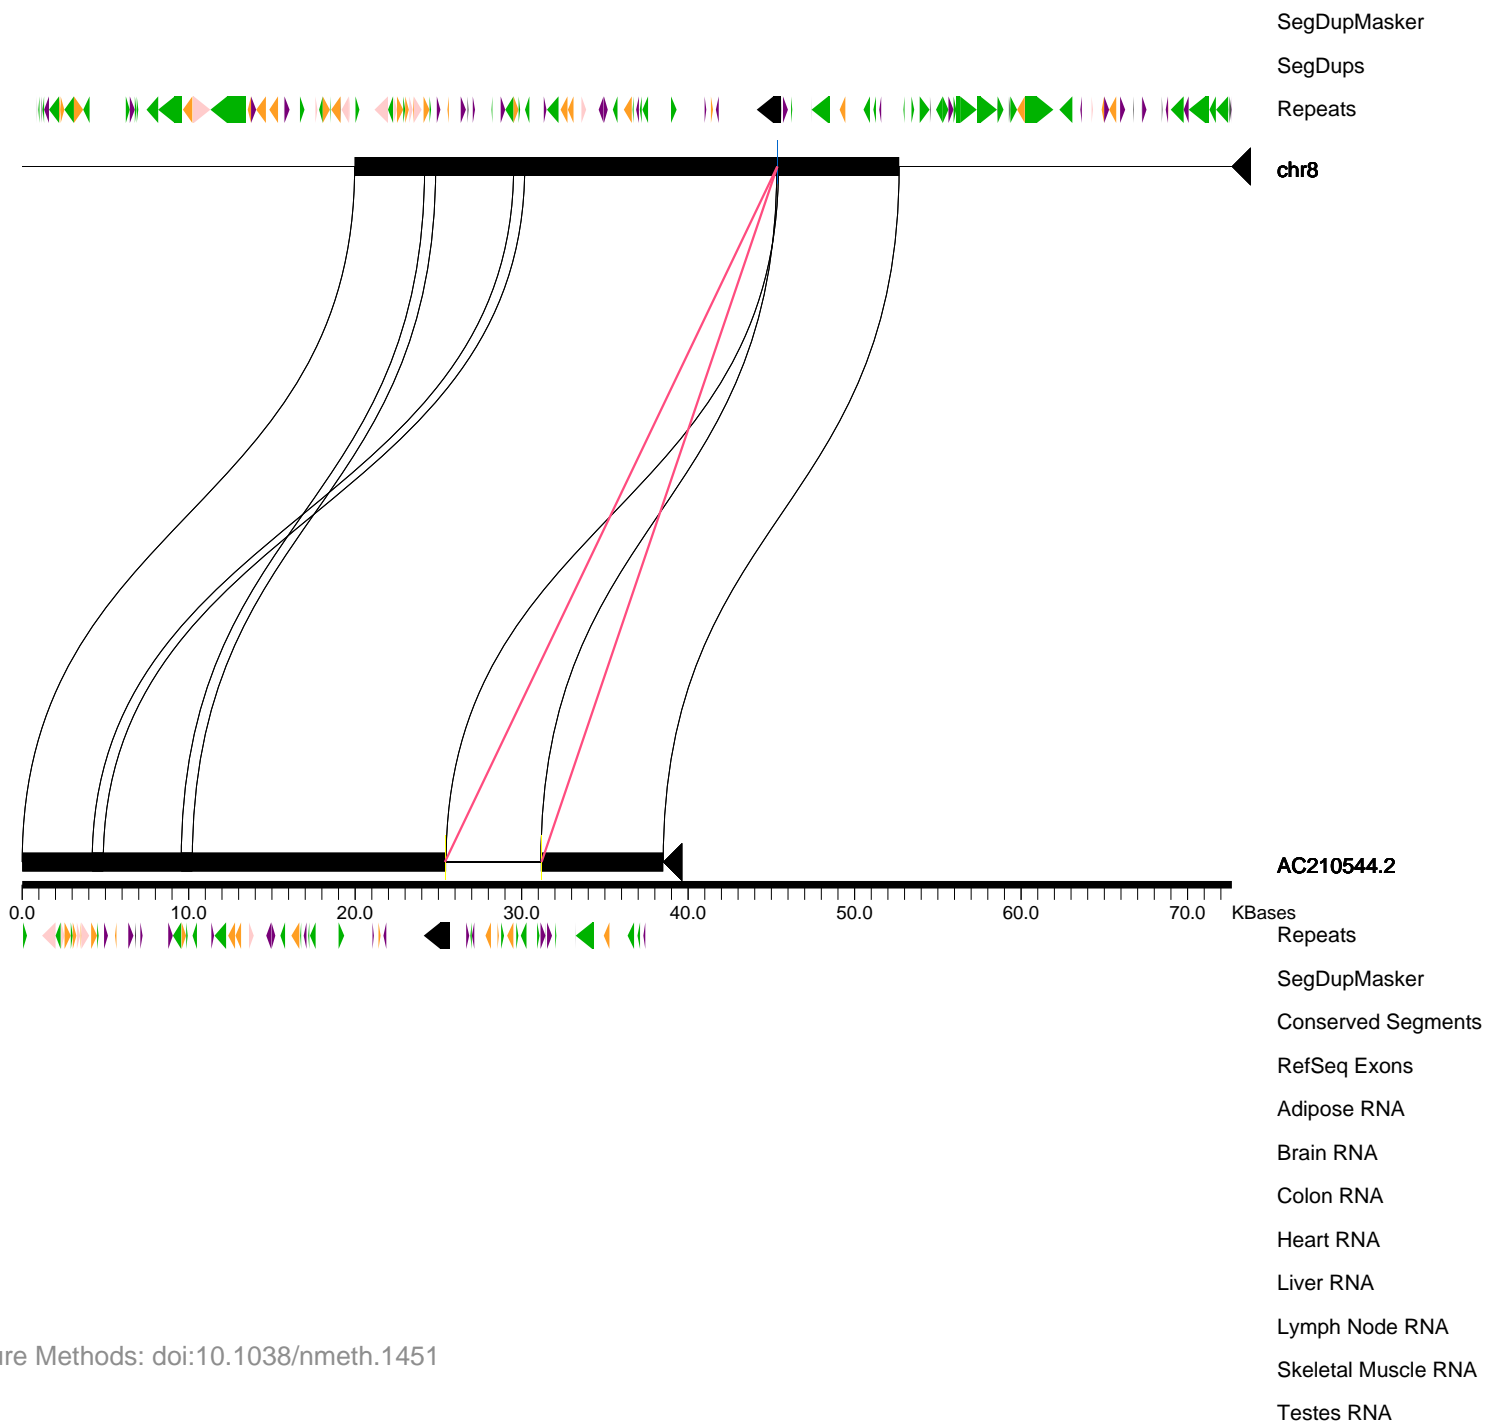

Clone file = AC210756.fa

Insertion Size: 7128

Other Simple Repeat Low Complexity DNA LTR LINE SINE

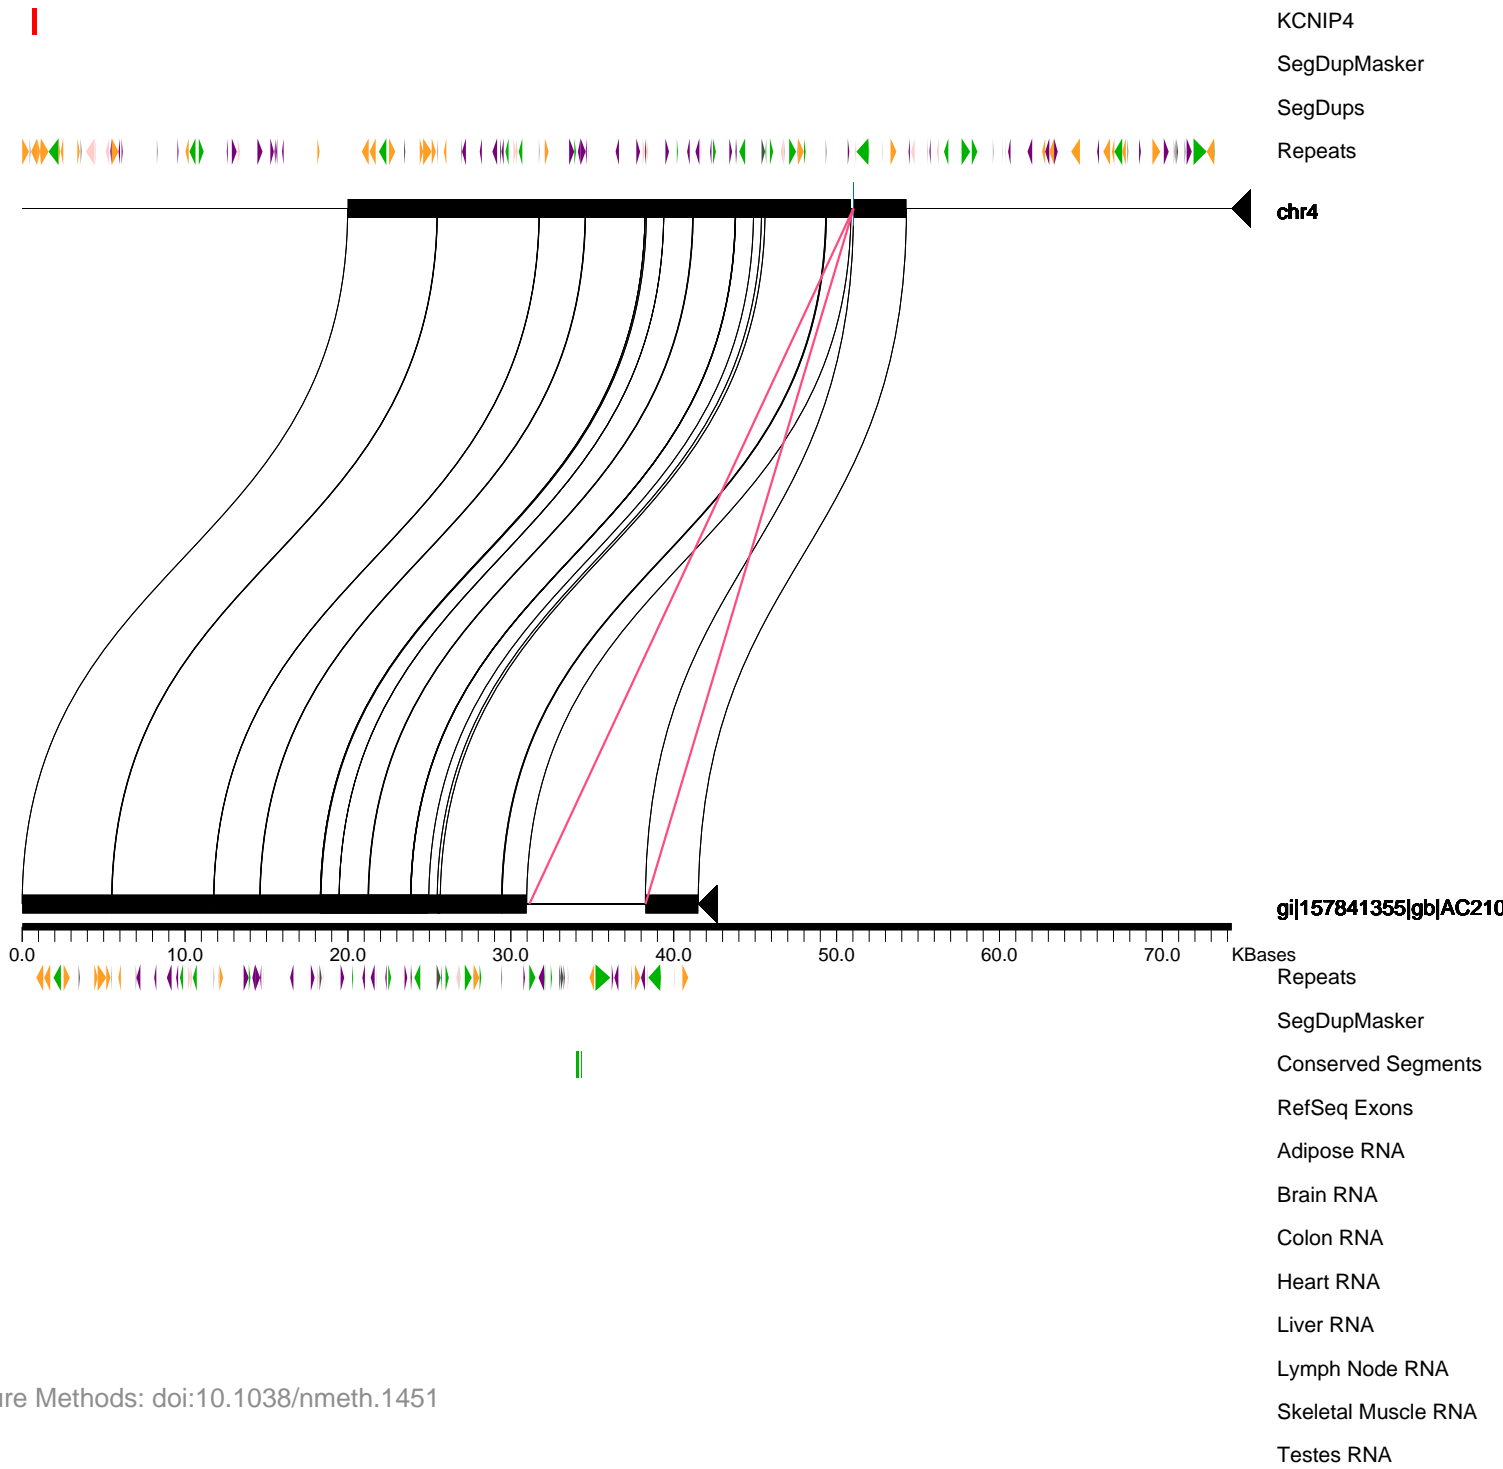

Clone file = AC210765.rc.fa

Insertion Size: 5405

Other Simple Repeat Low Complexity DNA LTR LINE SINE

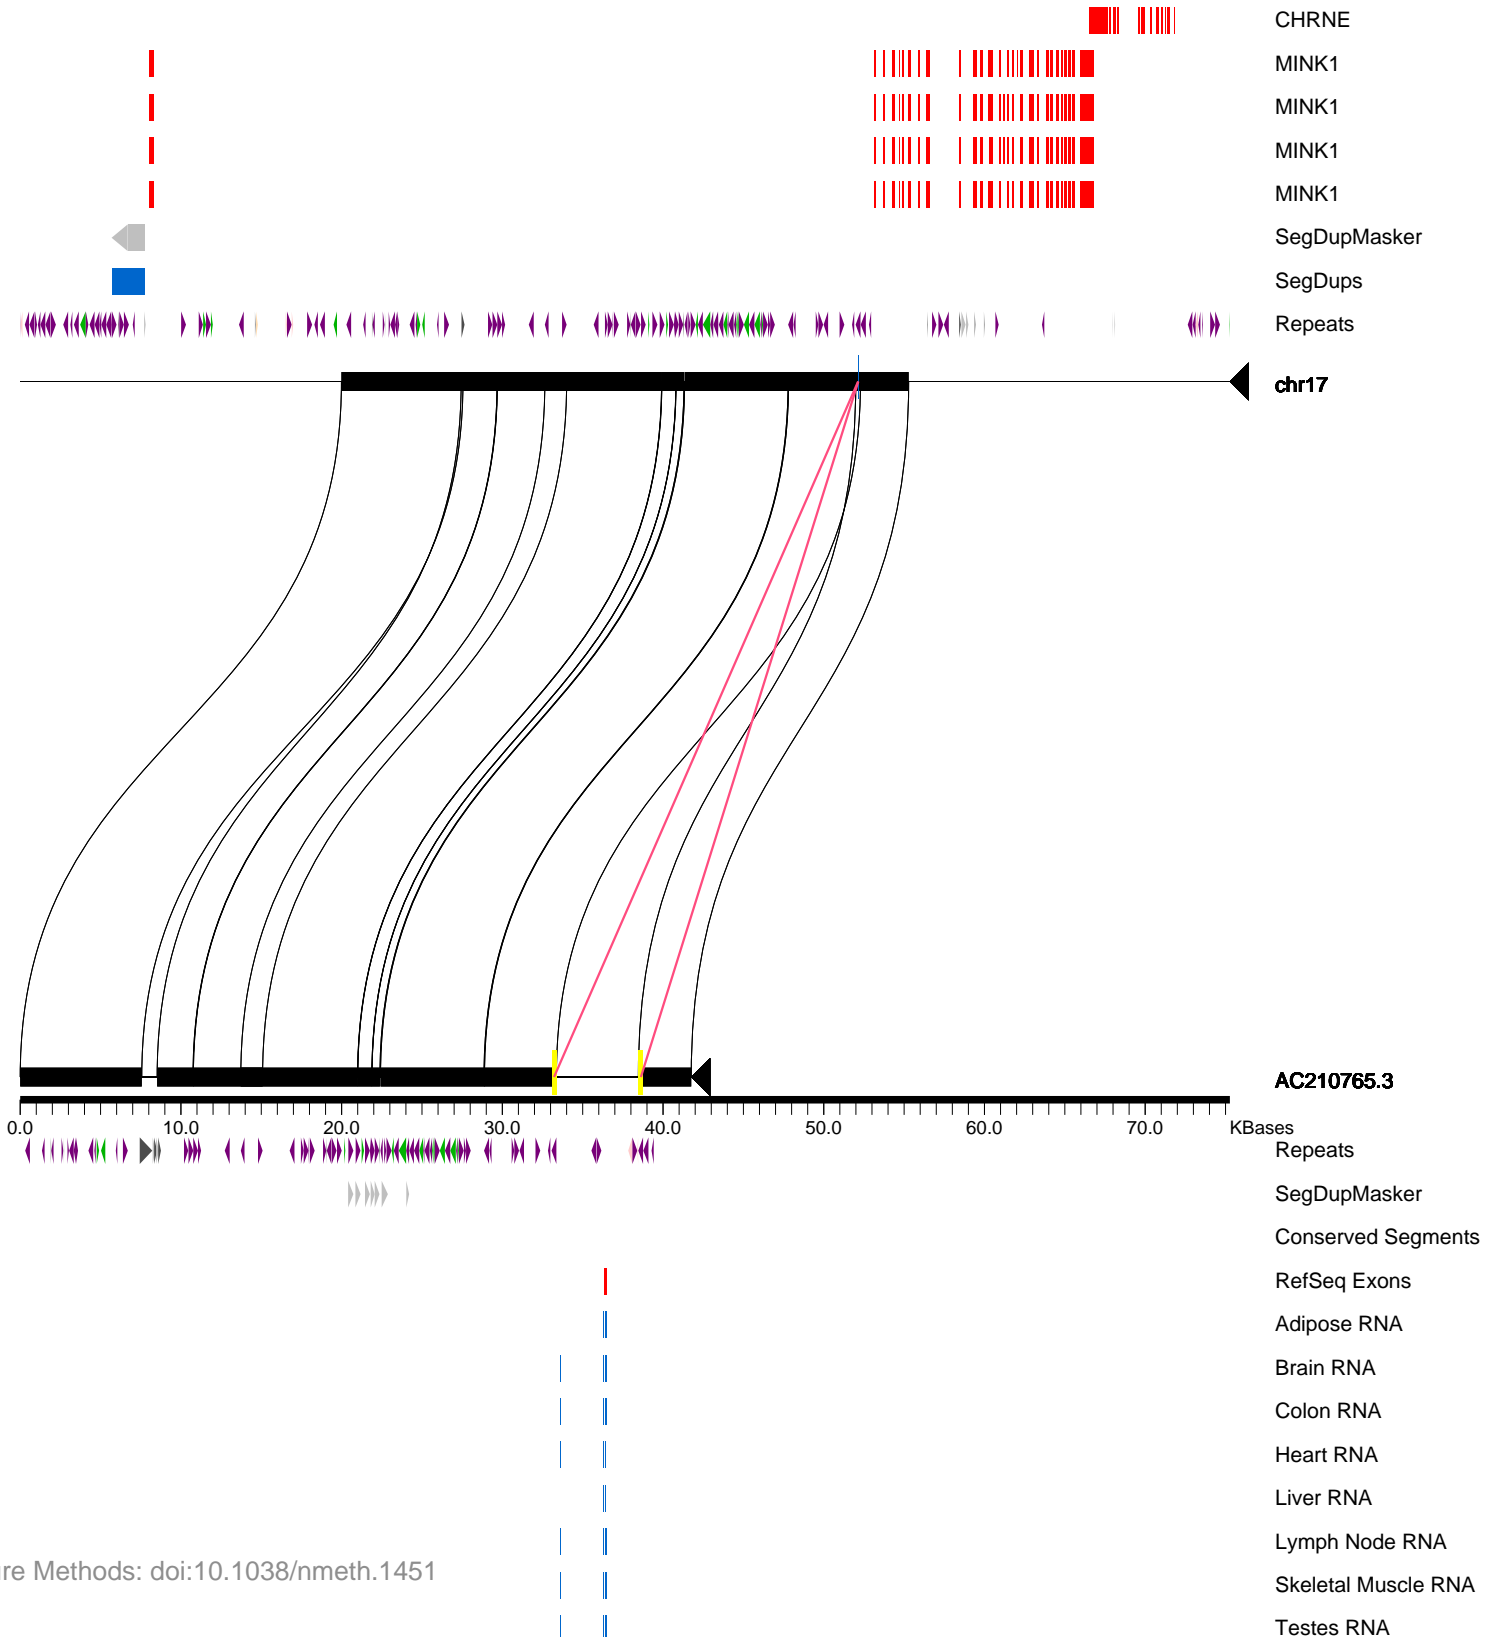



Clone file = AC210886.rc.fa

Insertion Size: 3949

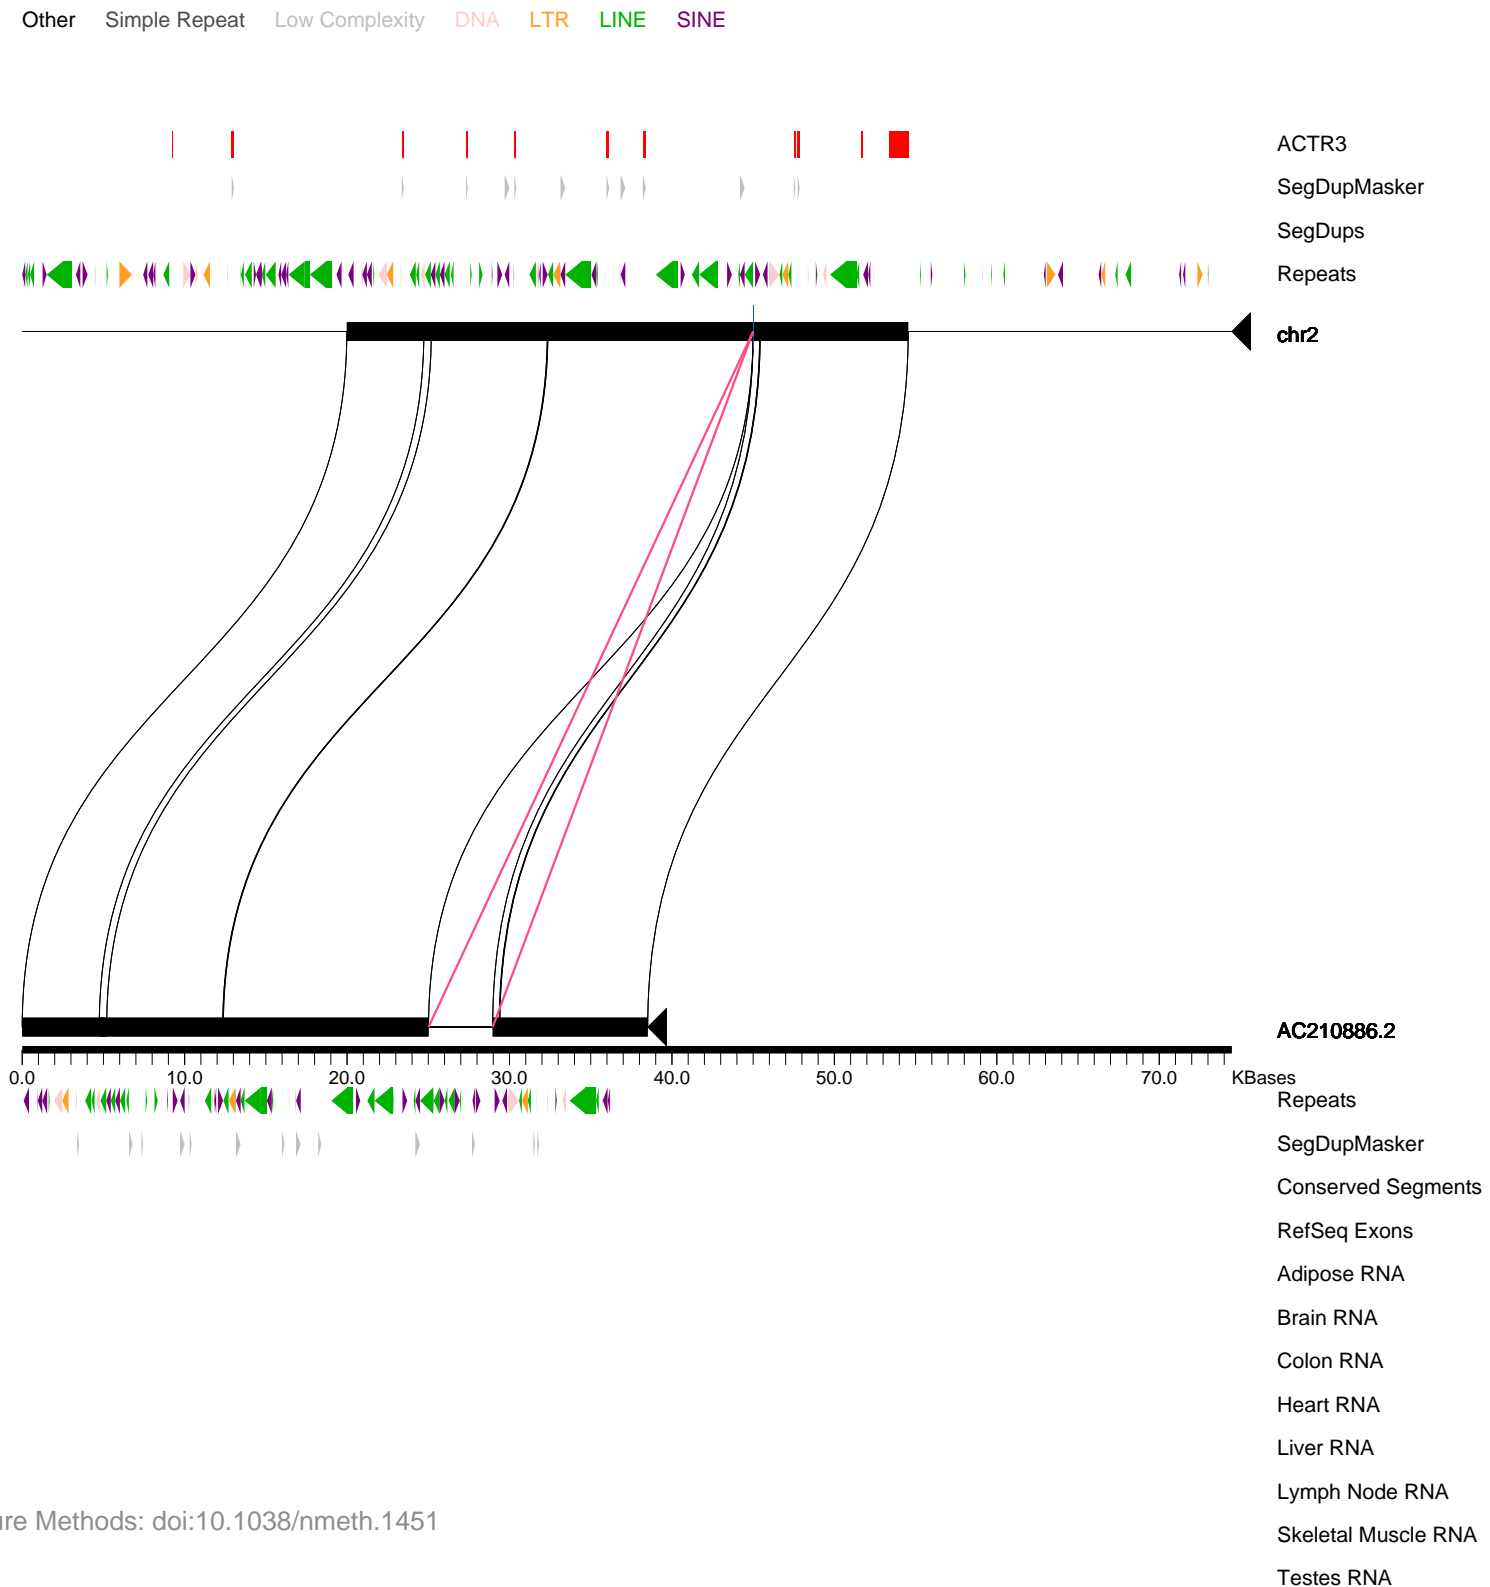

Clone file = AC210970.rc.fa

Insertion Size: 3179

Other Simple Repeat Low Complexity DNA LTR LINE SINE

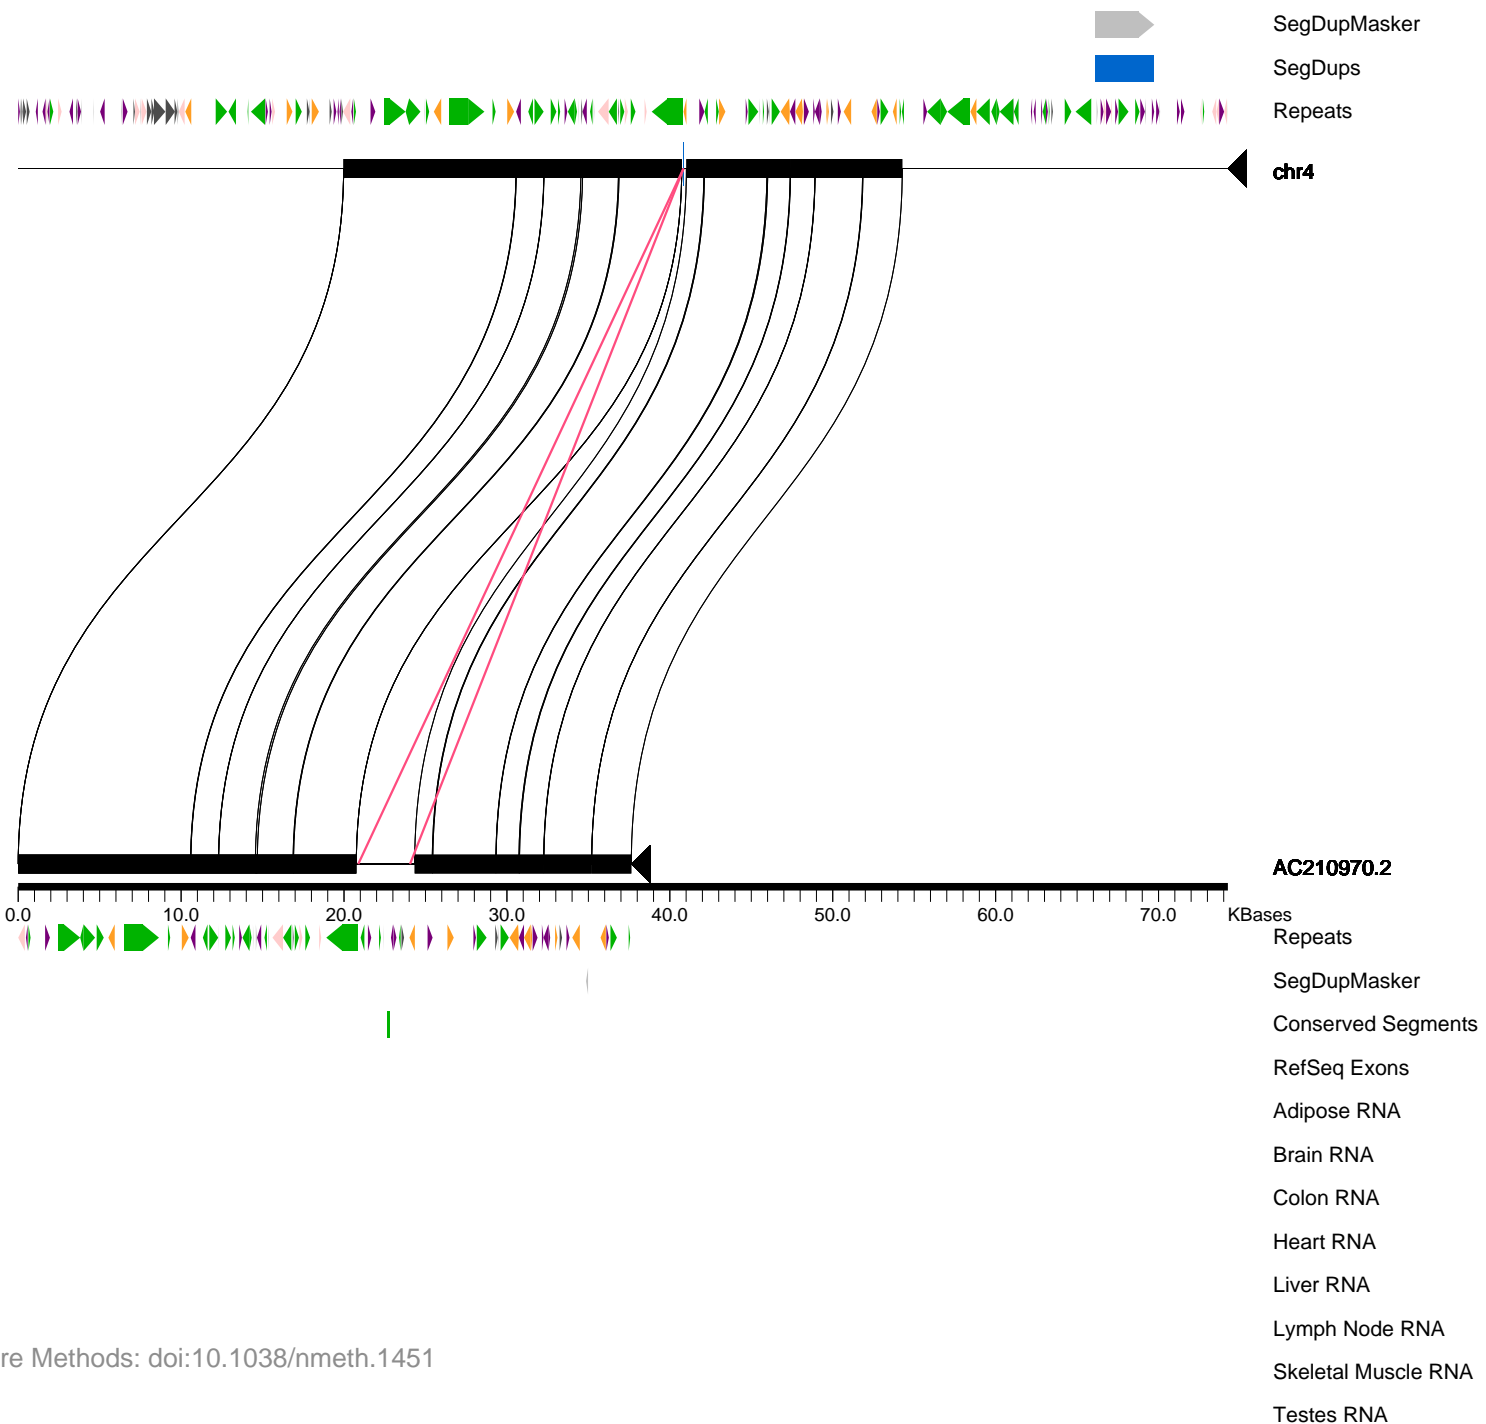

Clone file = AC211399.fa

Insertion Size: 10168

Other Simple Repeat Low Complexity DNA LTR LINE SINE

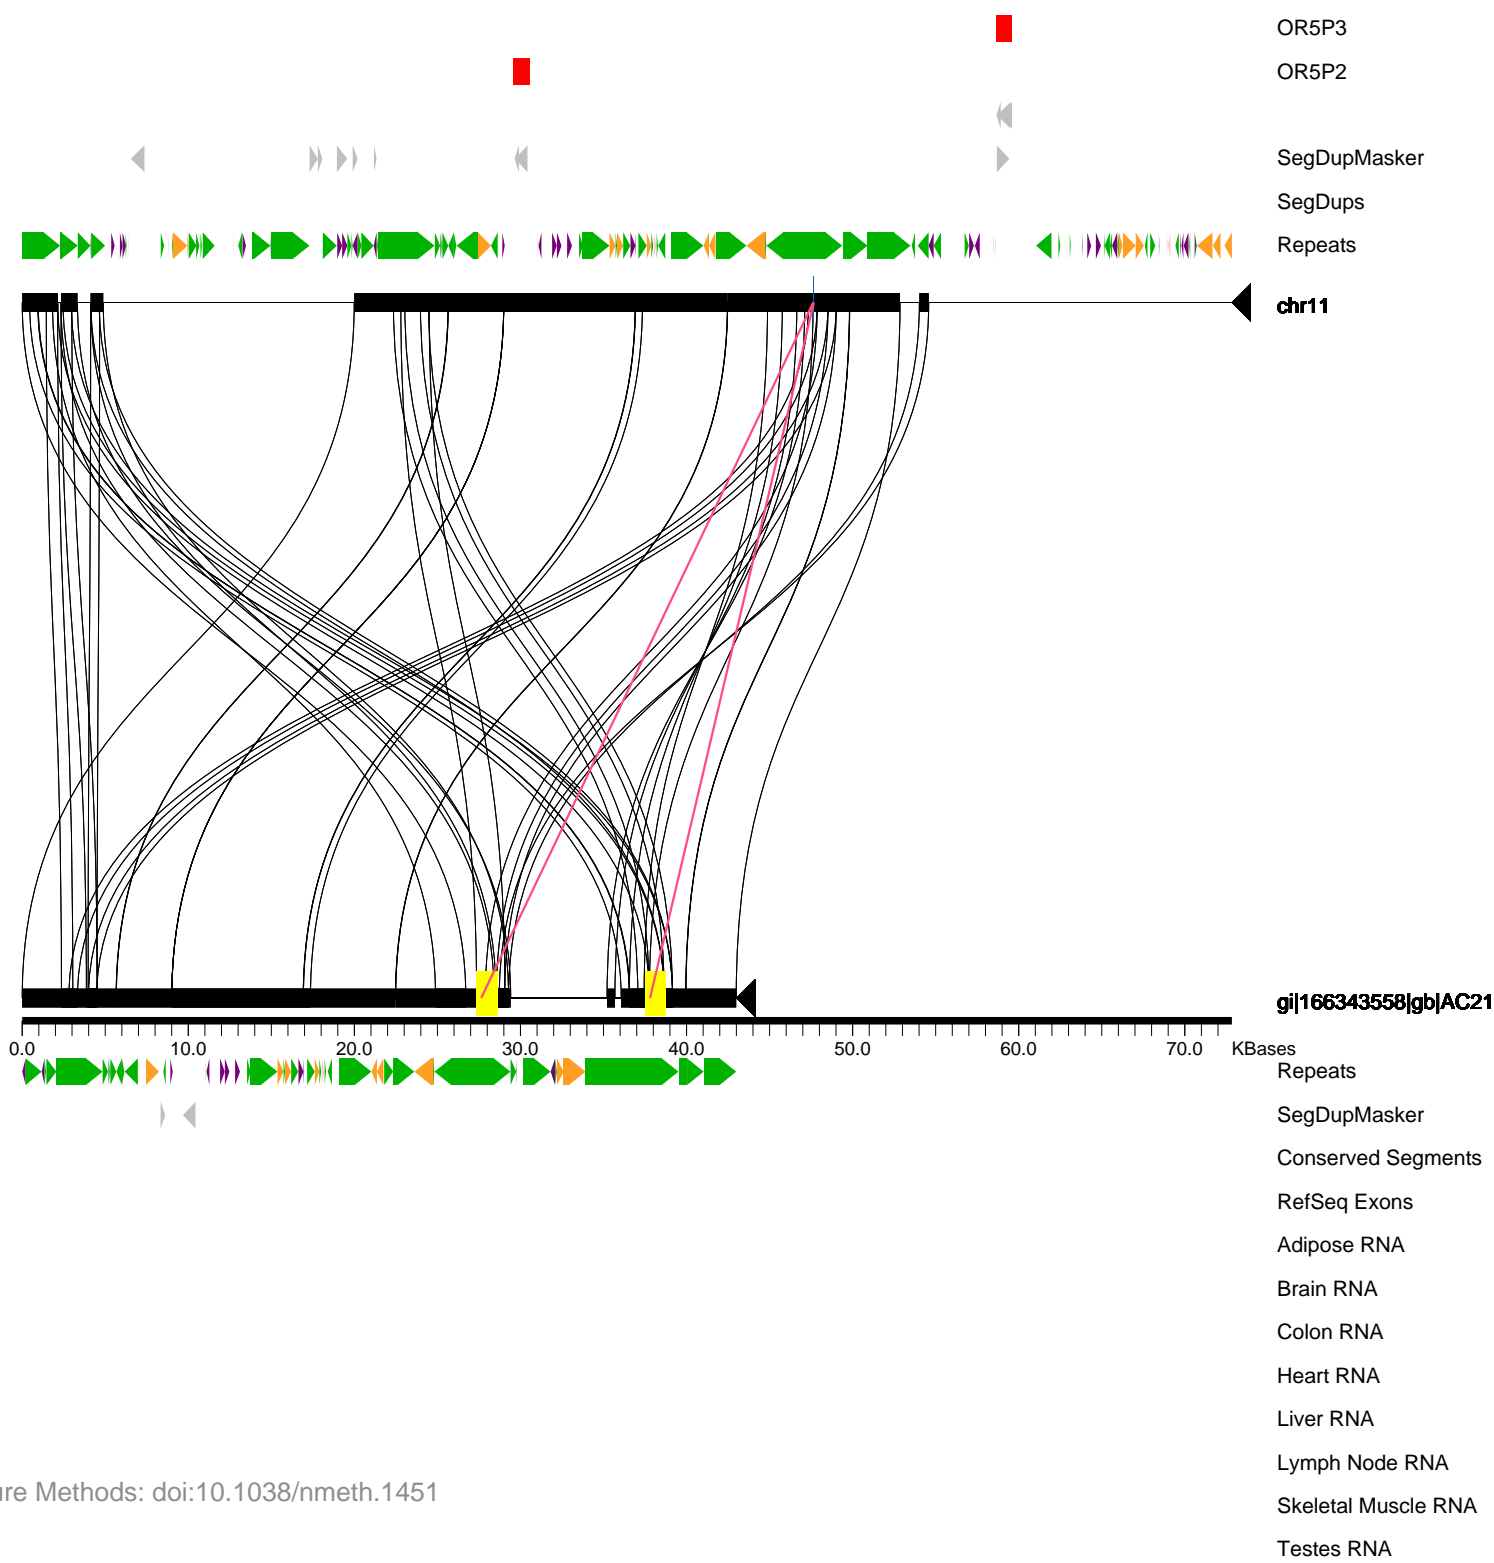

Clone file = AC211712.fa

Insertion Size: 6378

Other Simple Repeat Low Complexity DNA LTR LINE SINE

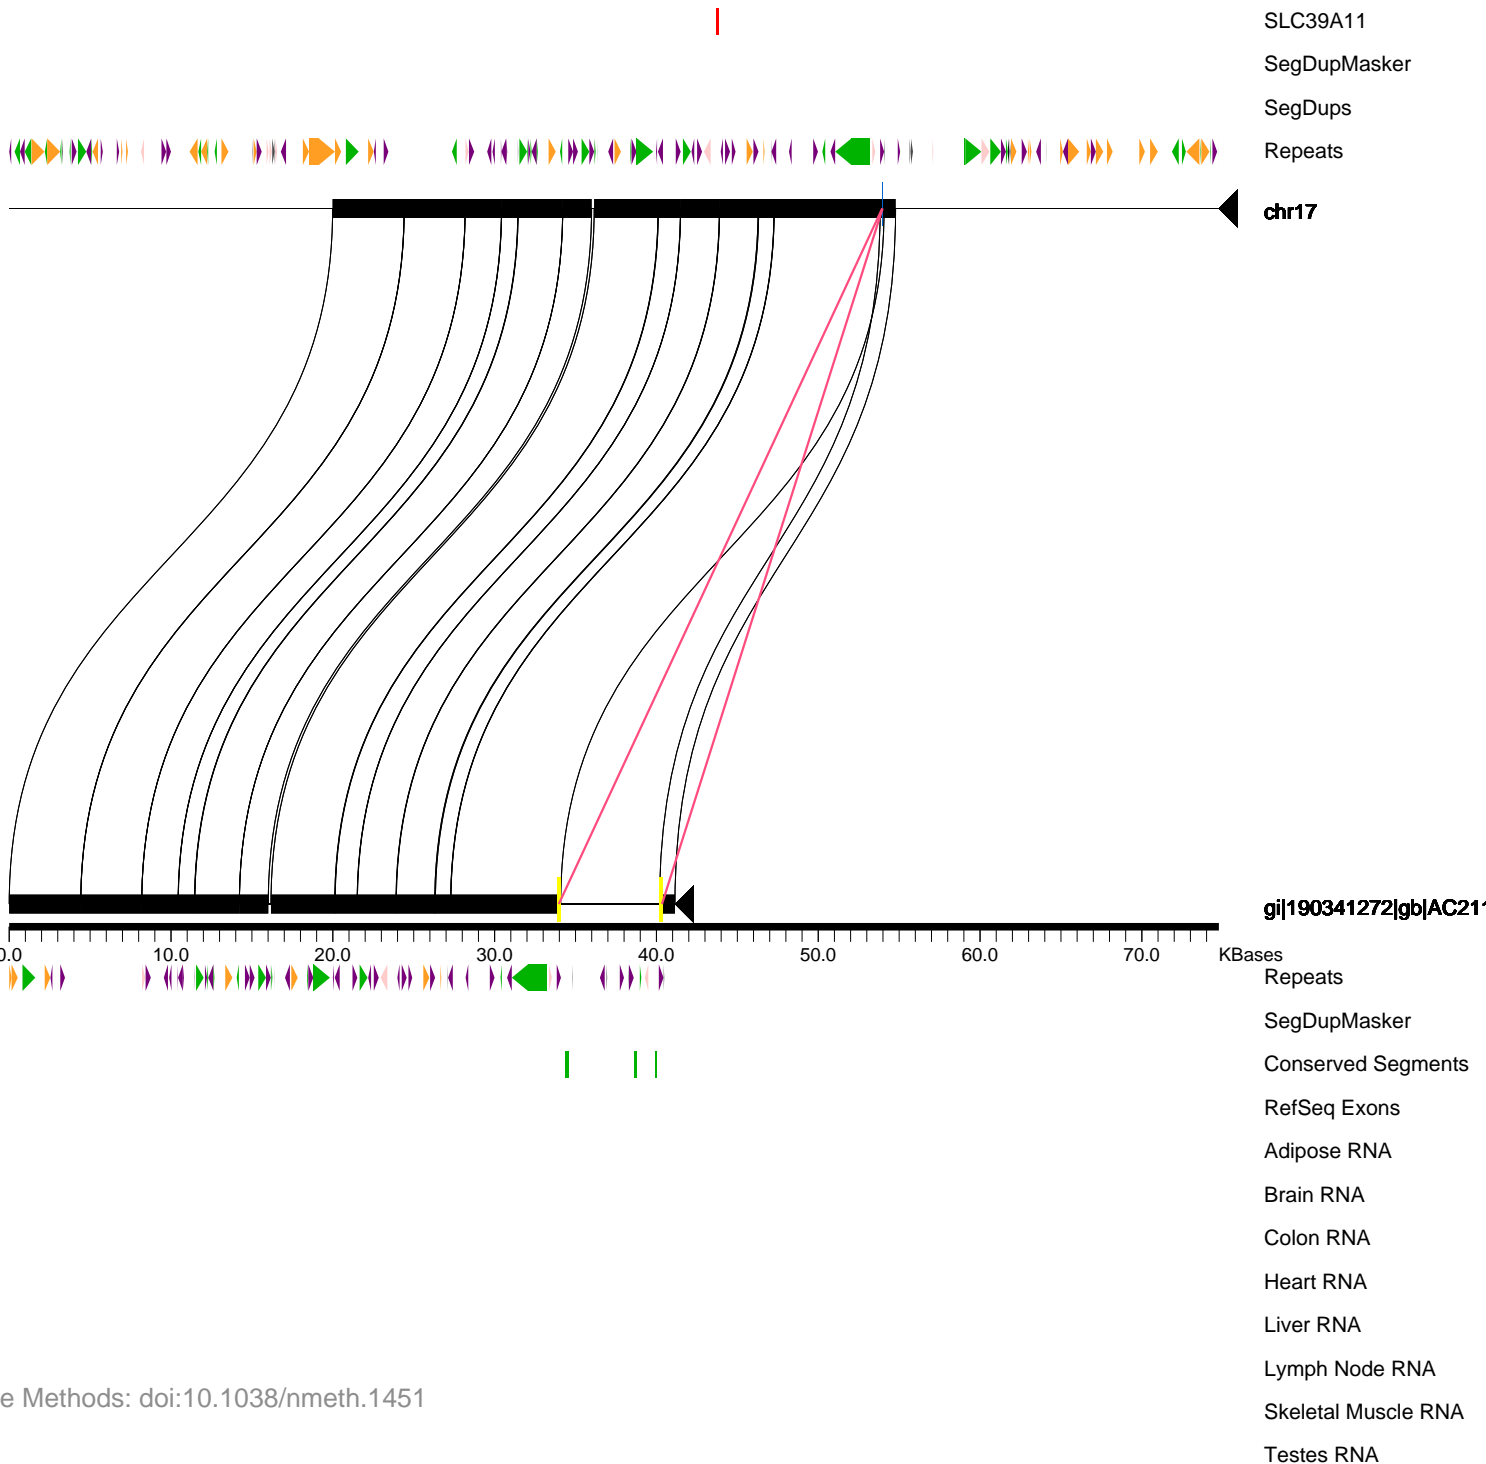

Clone file = AC212491.fa

Insertion Size: 4137

Other Simple Repeat Low Complexity DNA LTR LINE SINE

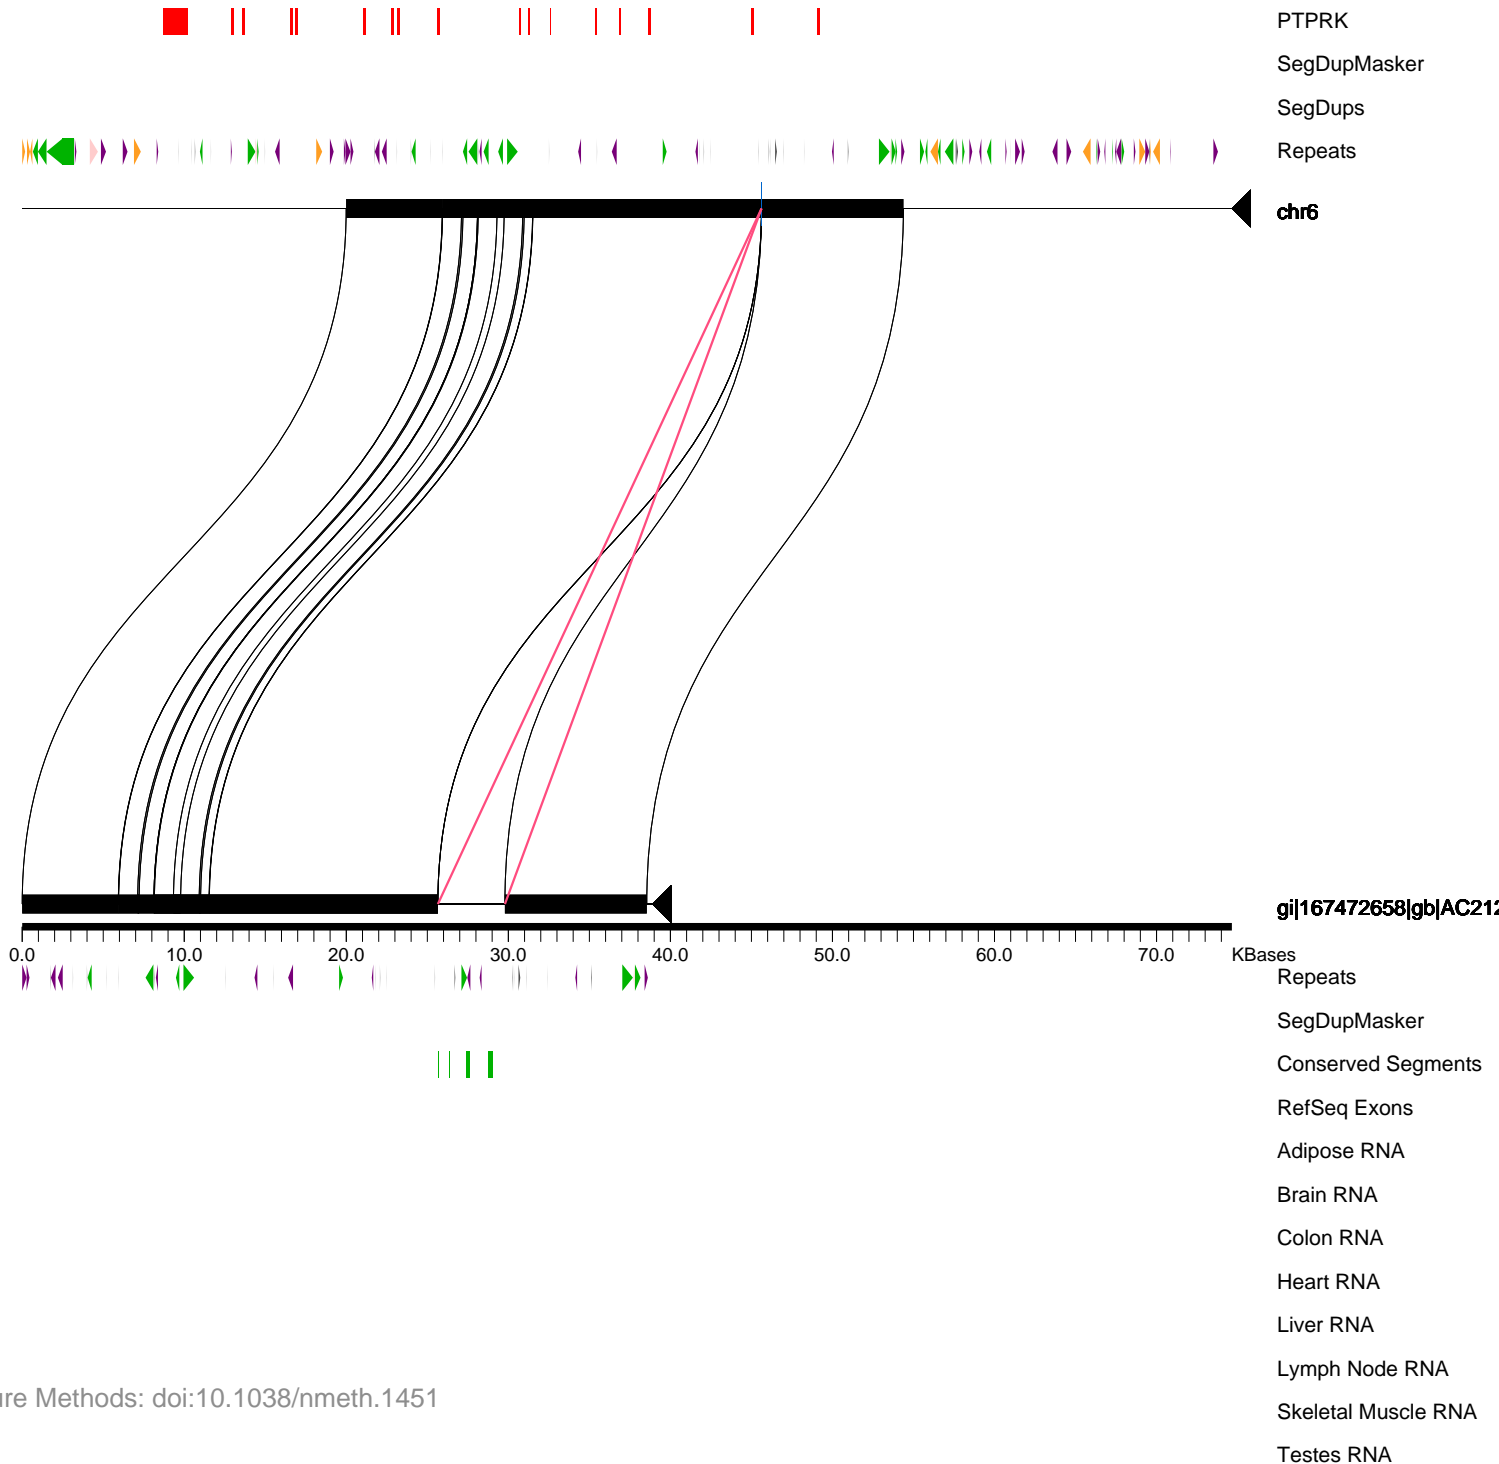

Clone file = AC212752.rc.fa

Insertion Size: 11461

Other Simple Repeat Low Complexity DNA LTR LINE SINE

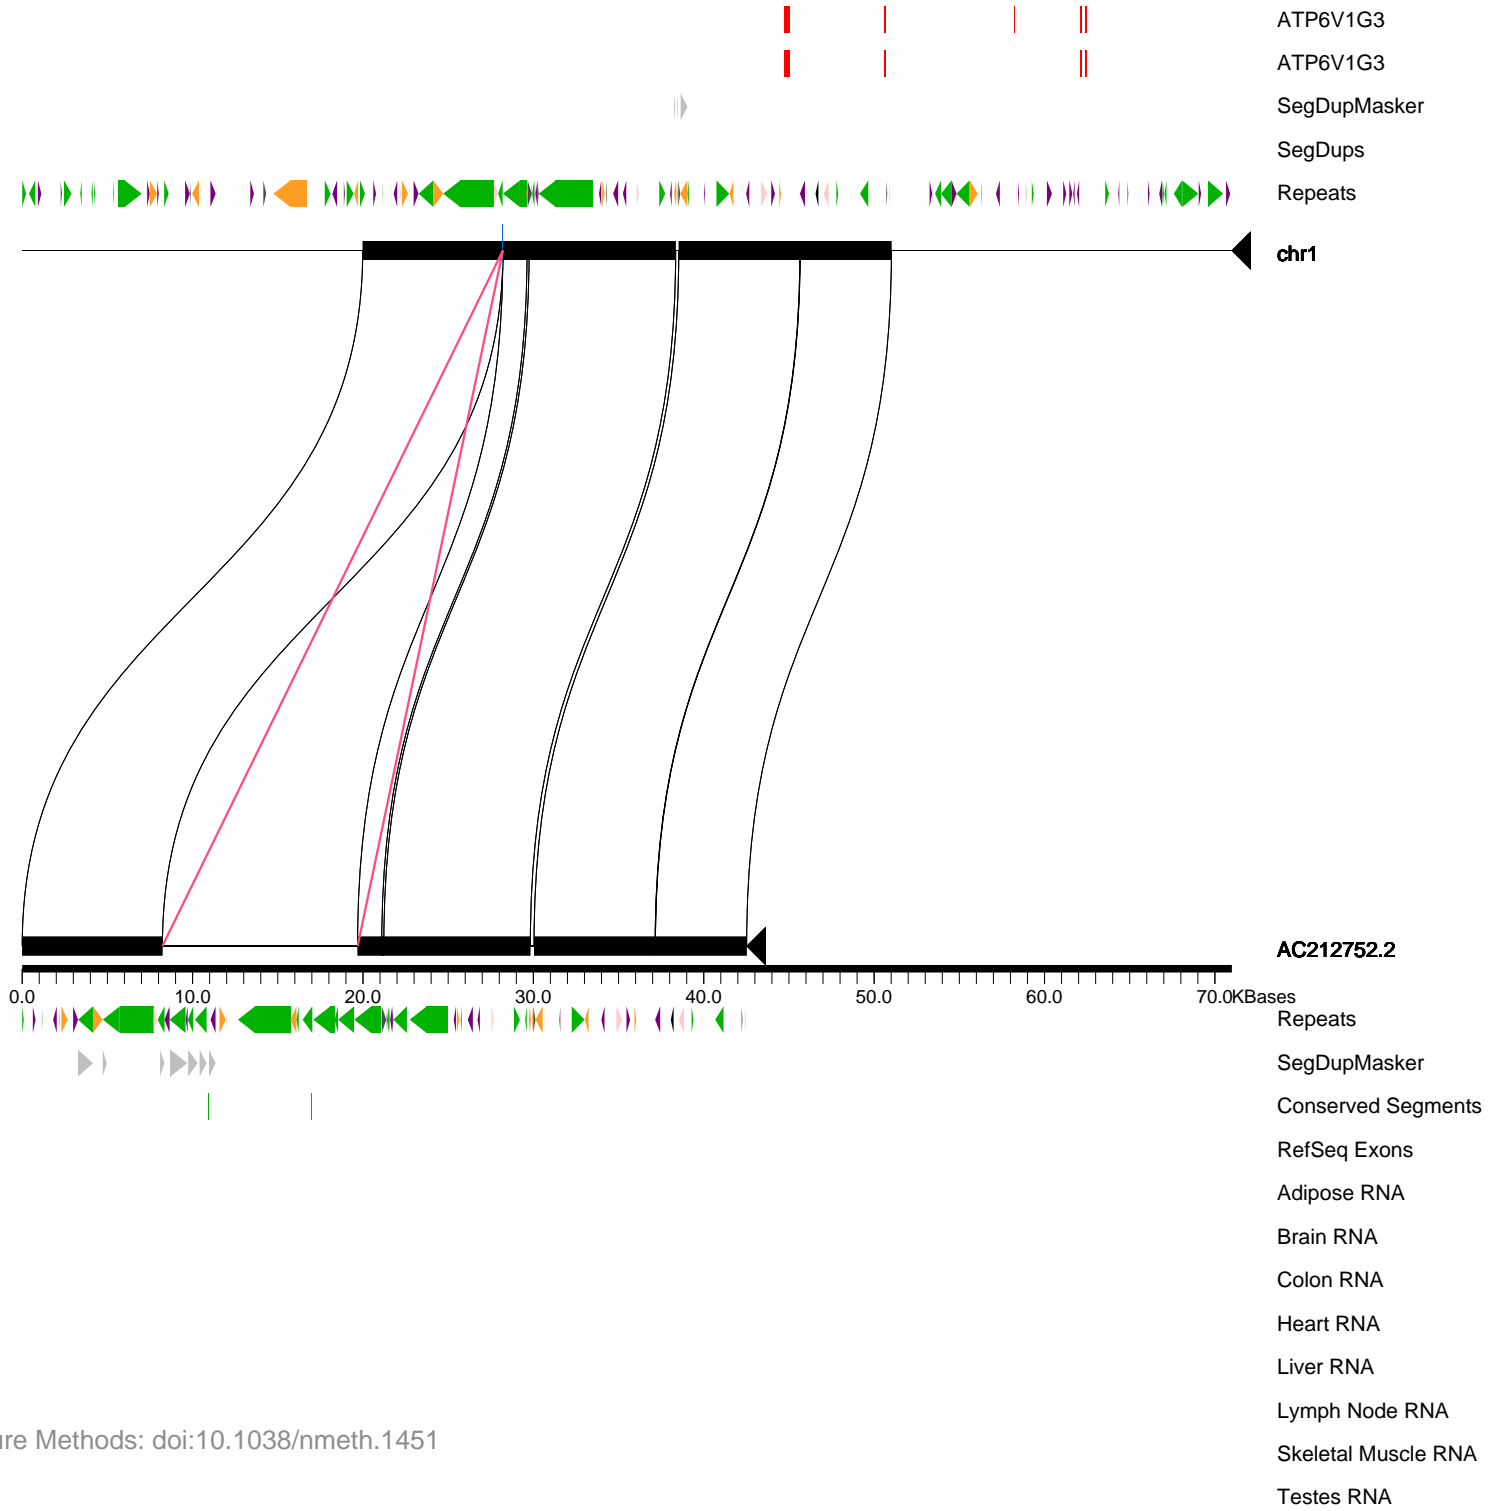

Clone file = AC212759.fa

Insertion Size: 10171

Other Simple Repeat Low Complexity DNA LTR LINE SINE

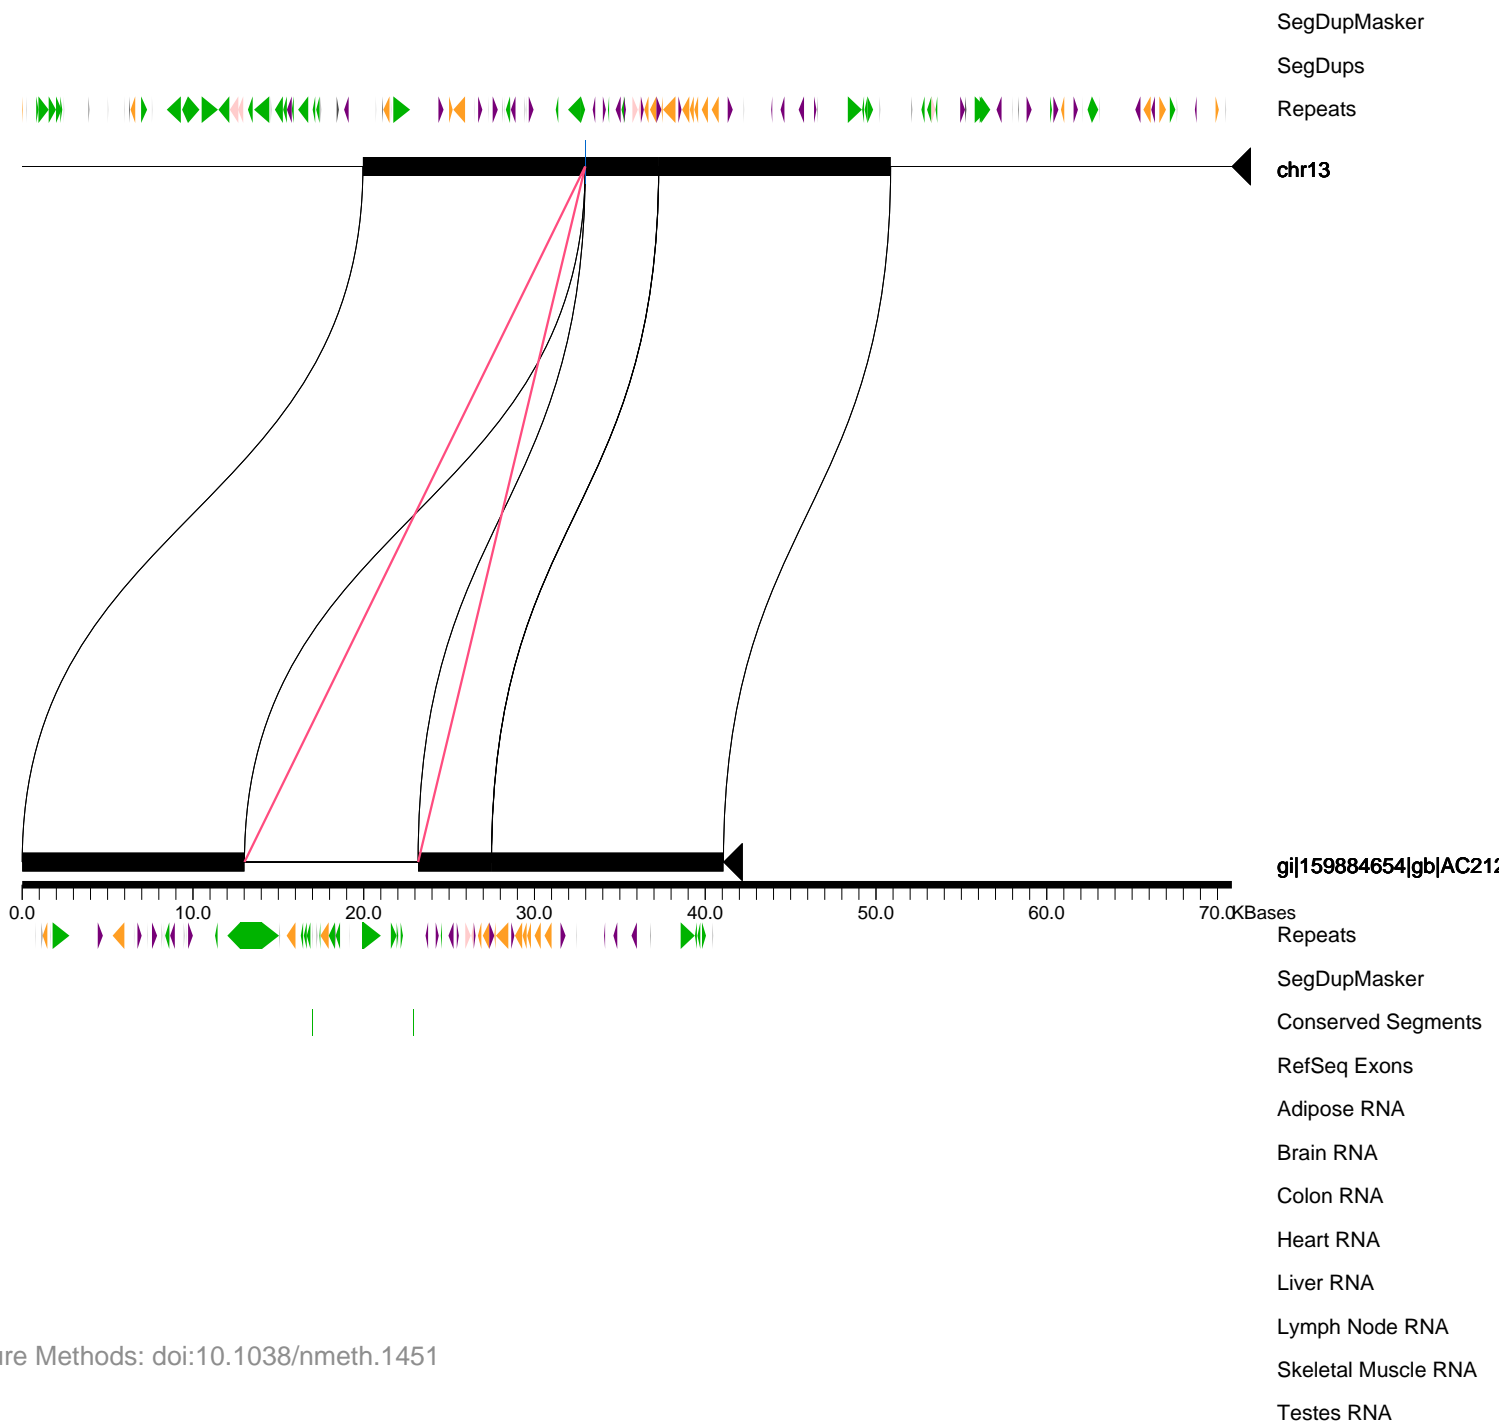

Clone file = AC212794.rc.fa

Insertion Size: 4609

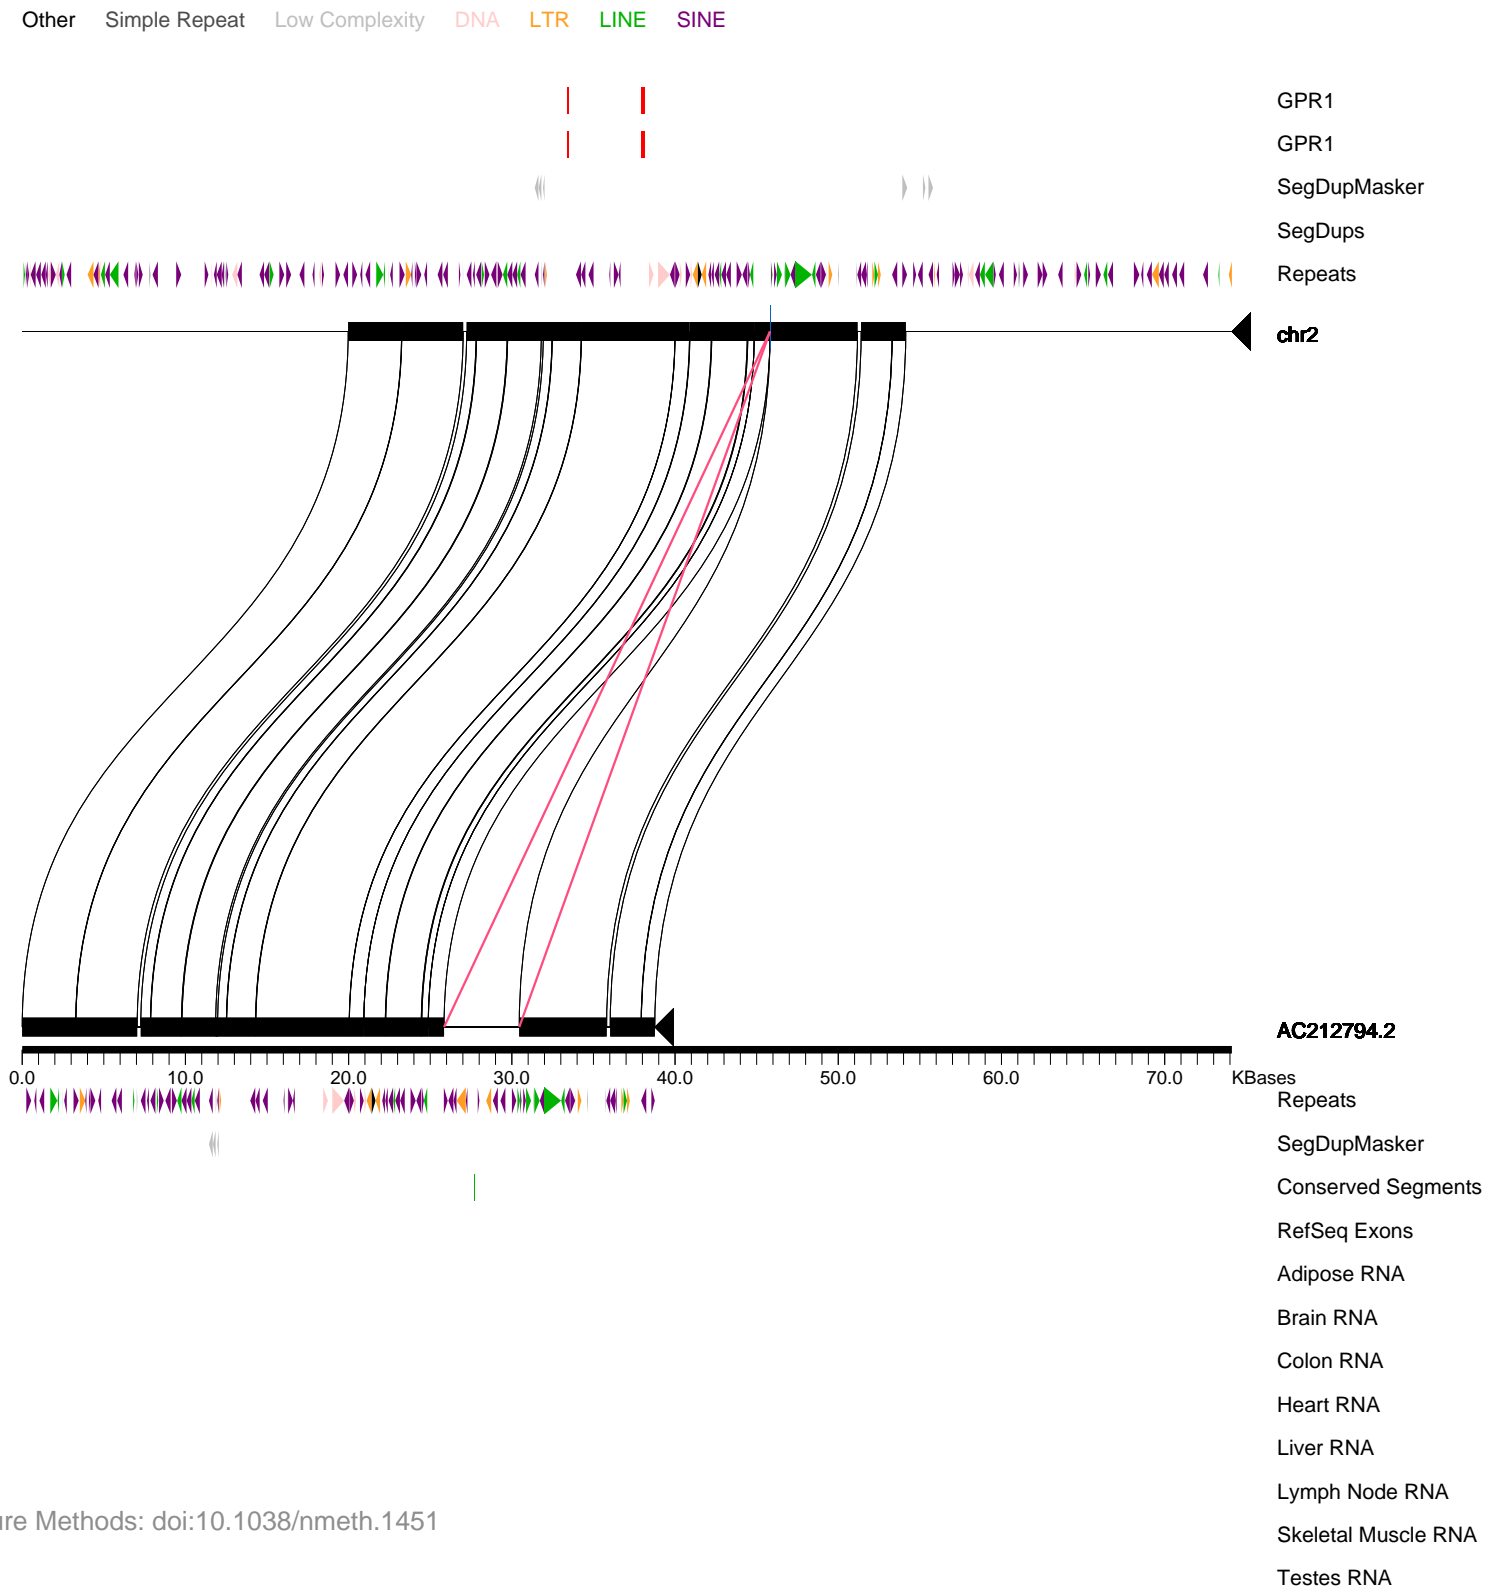



Clone file = AC212901.fa

Insertion Size: 11103

Other Simple Repeat Low Complexity DNA LTR LINE SINE

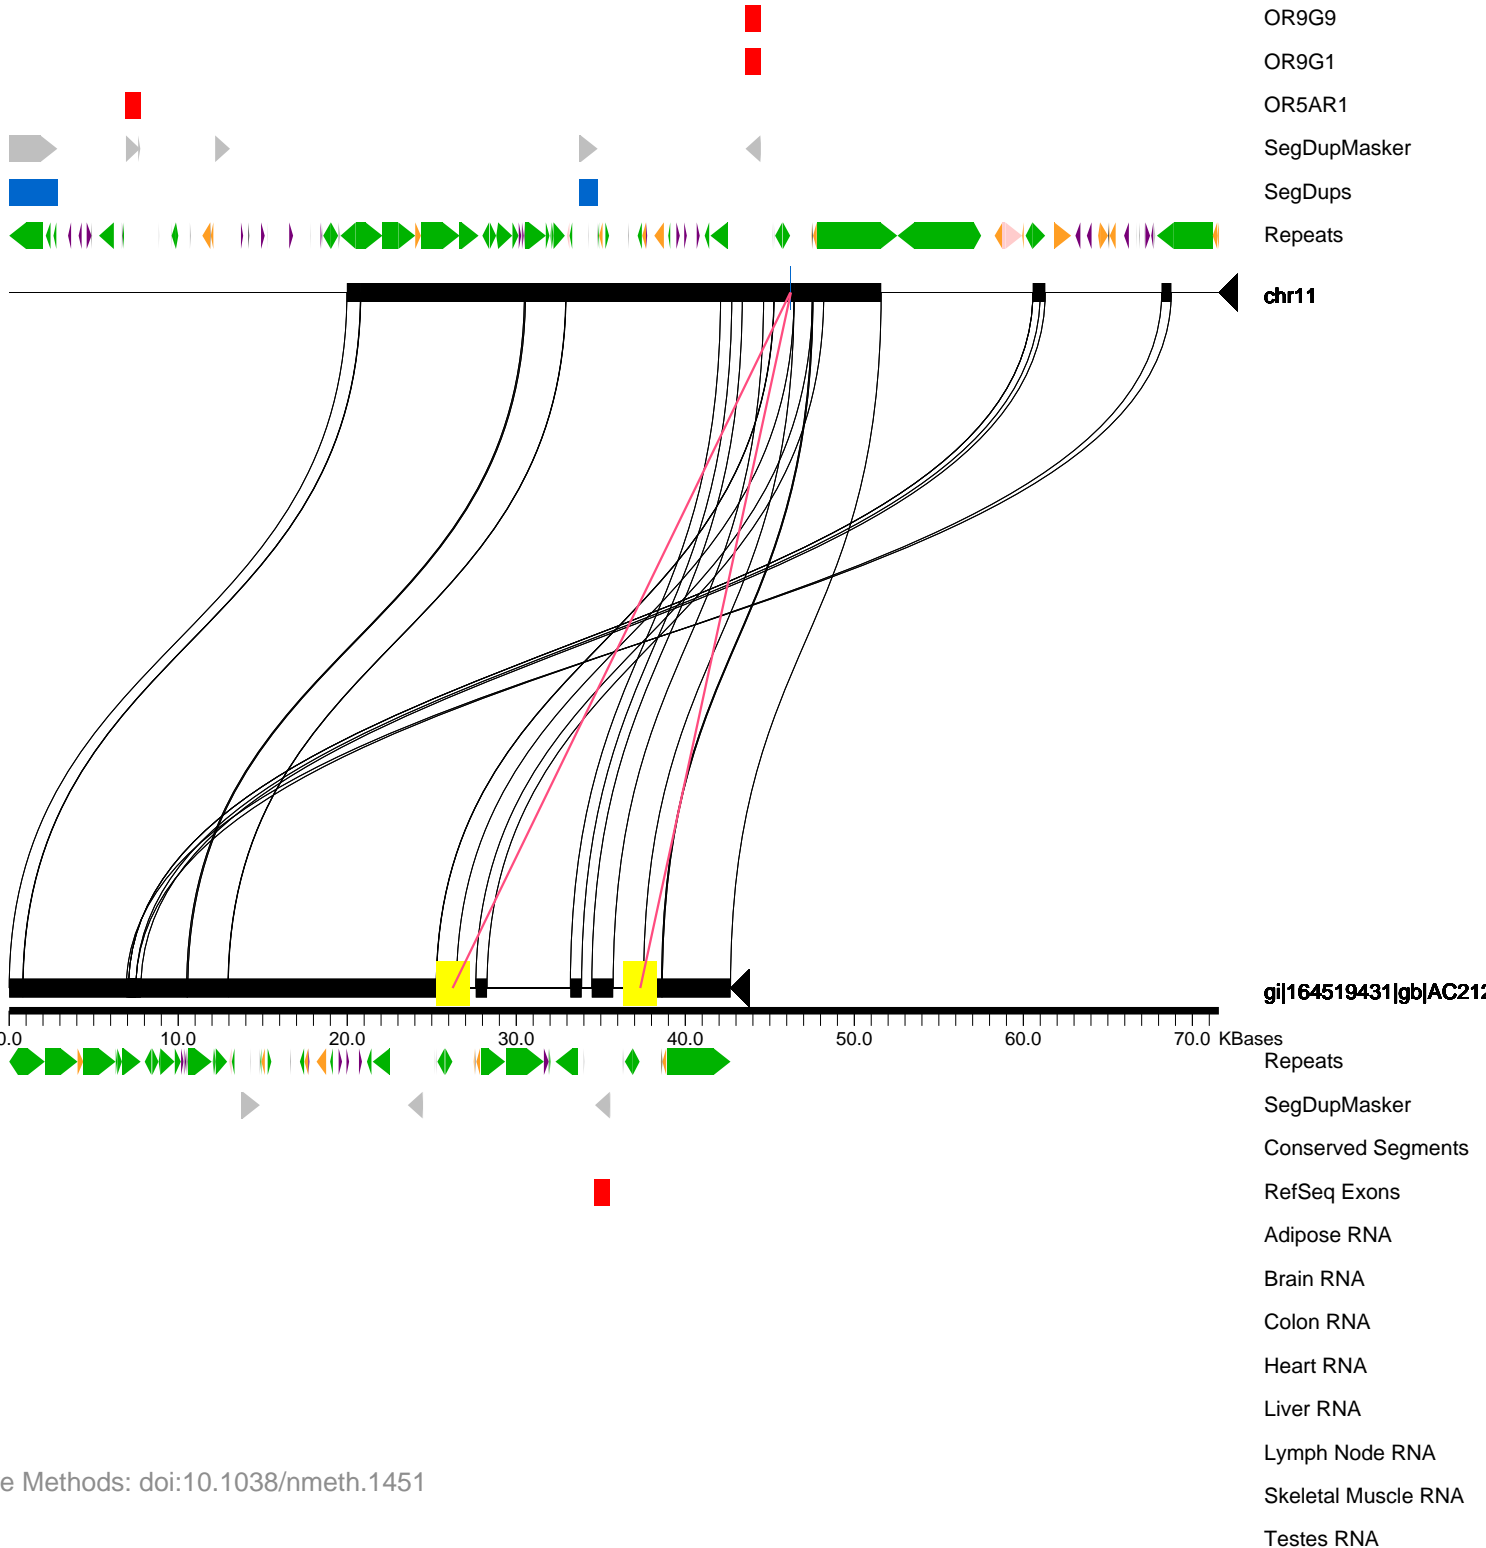

Clone file = AC212910.rc.fa

Insertion Size: 12842

Other Simple Repeat Low Complexity DNA LTR LINE SINE

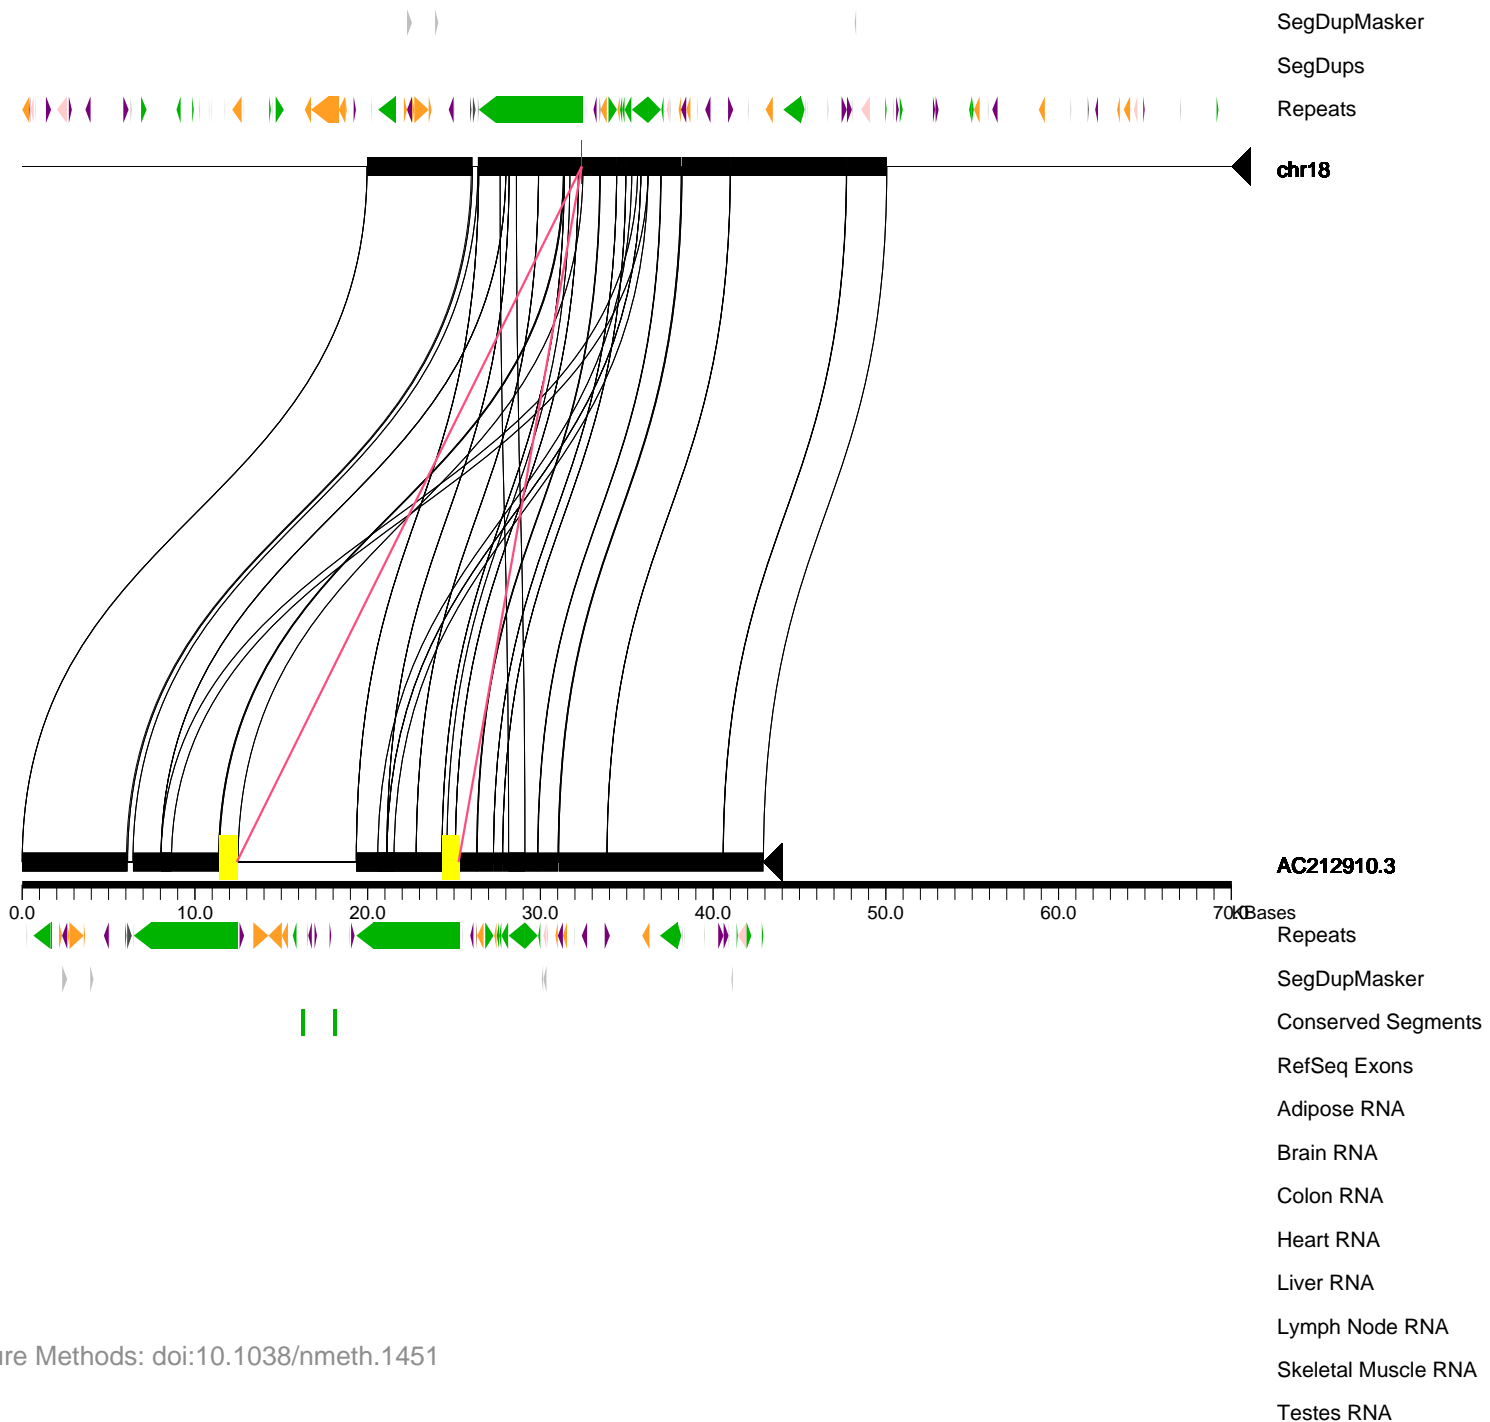

Clone file = AC213029.rc.fa

Insertion Size: 3558

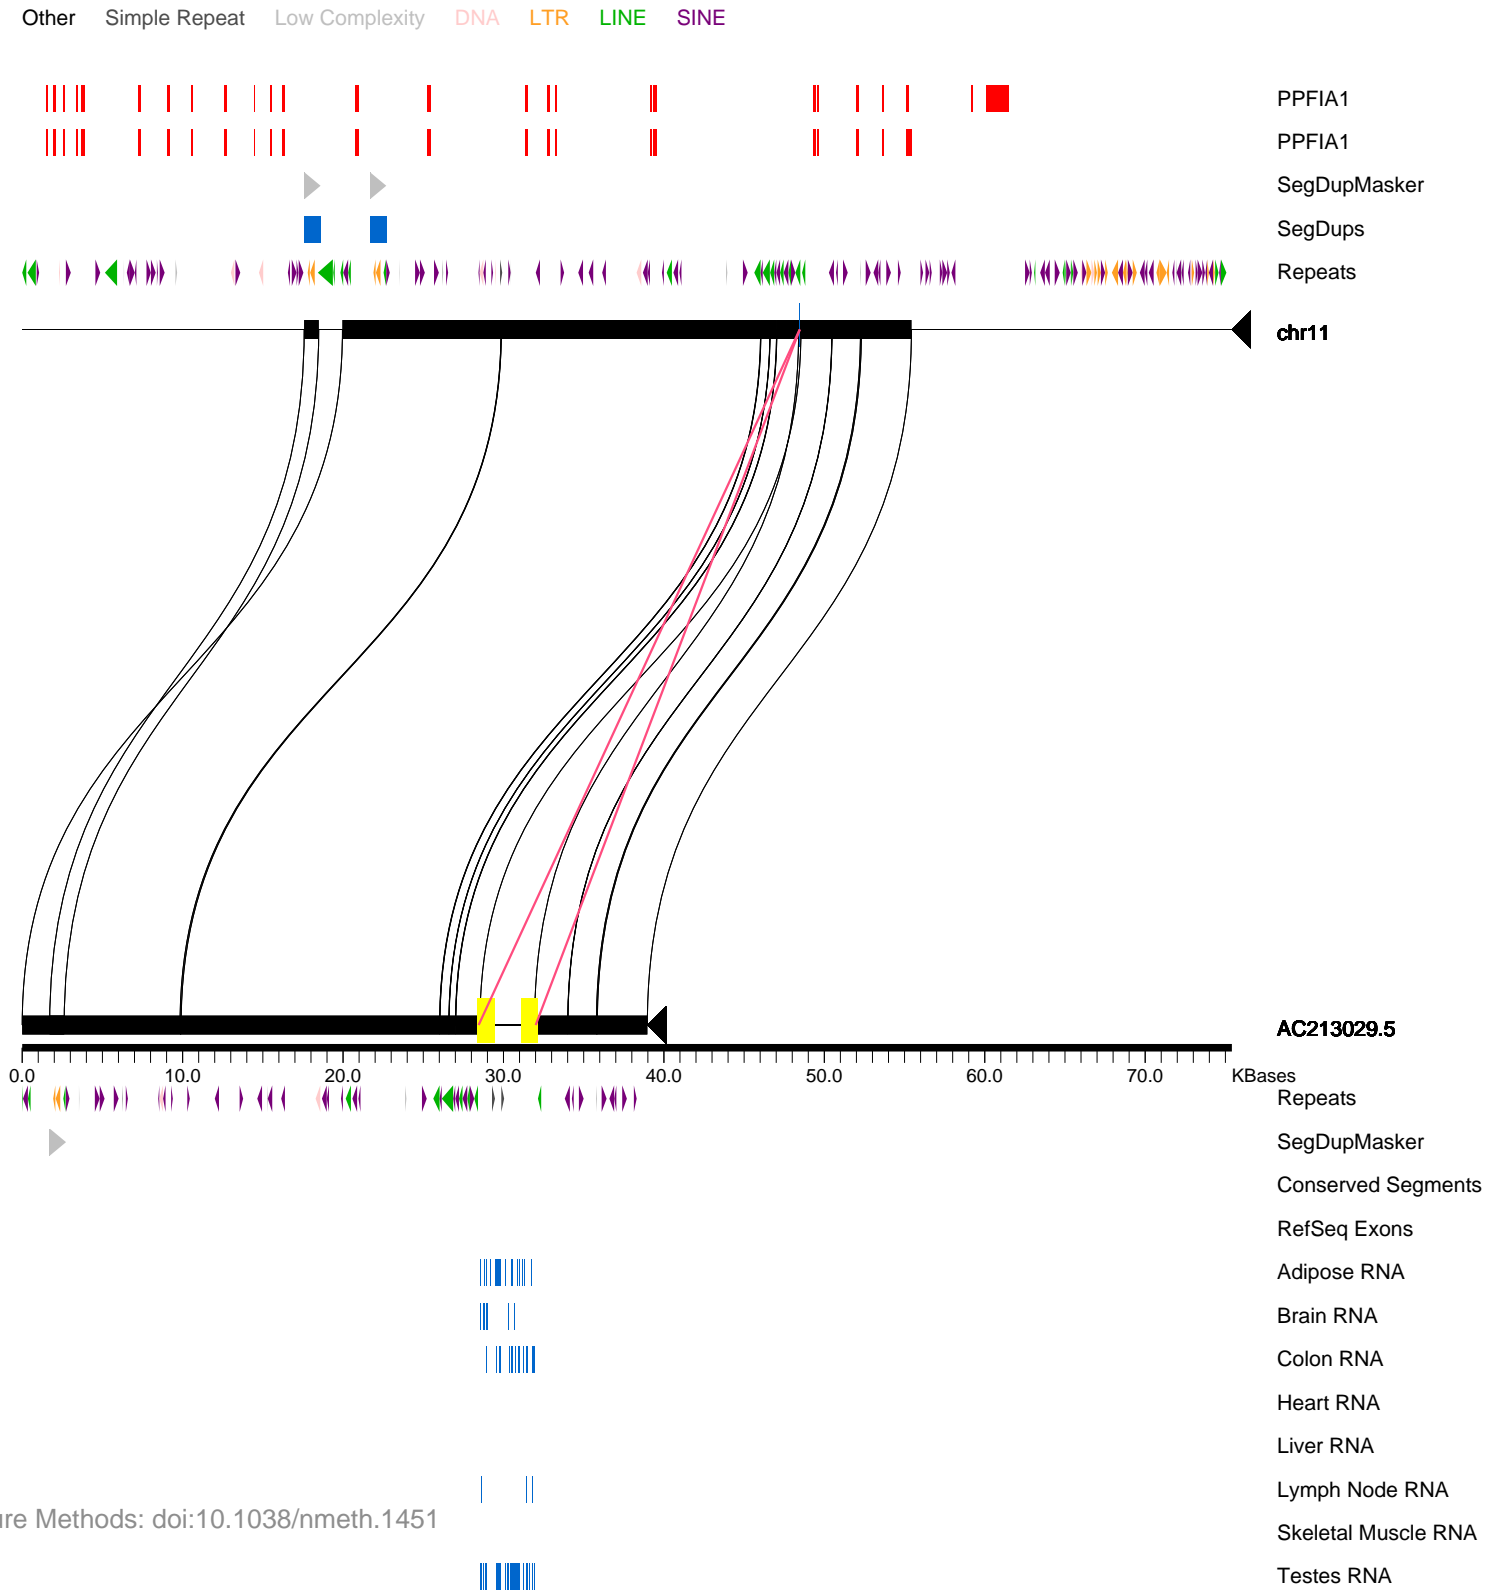

Clone file = AC213121.rc.fa

Insertion Size: 4338

Other Simple Repeat Low Complexity DNA LTR LINE SINE

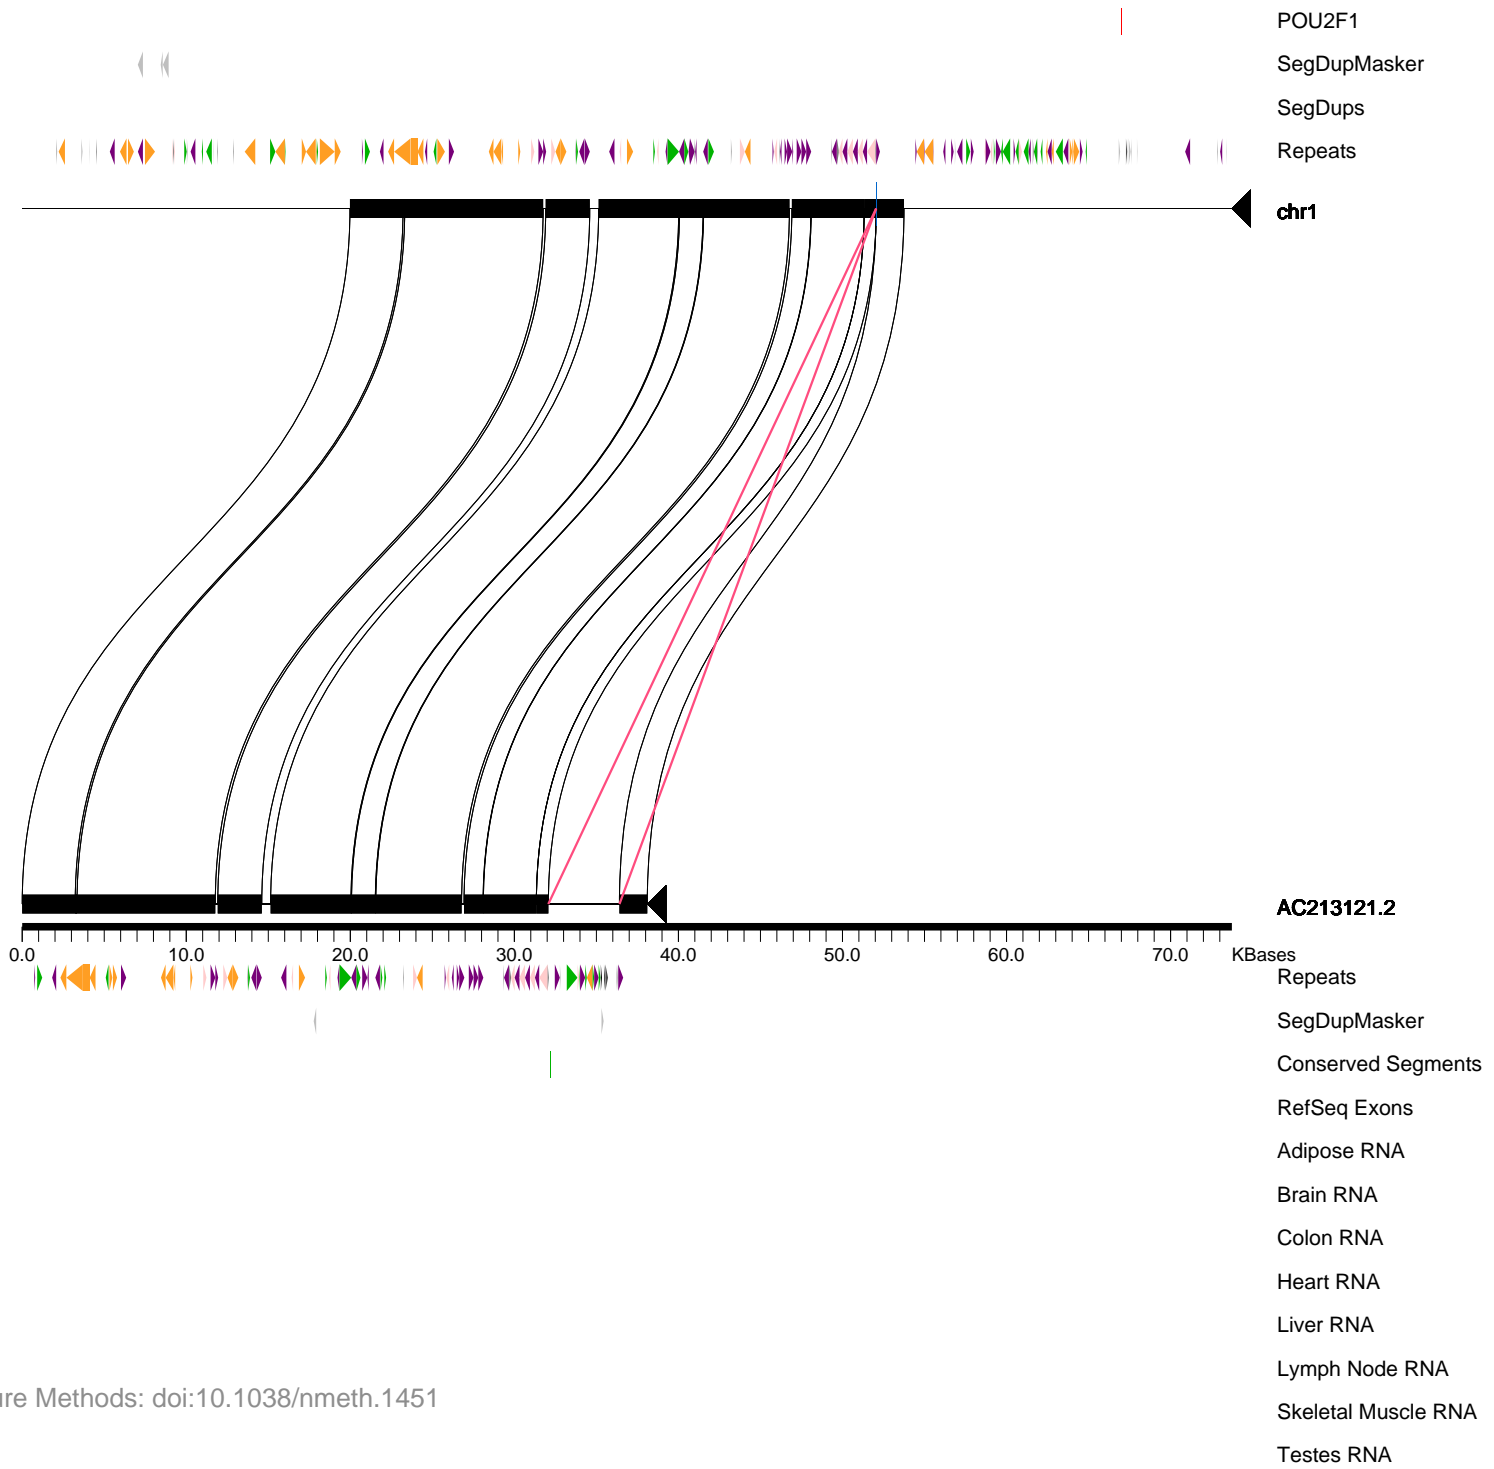

Clone file = AC213223.rc.fa

Insertion Size: 11105

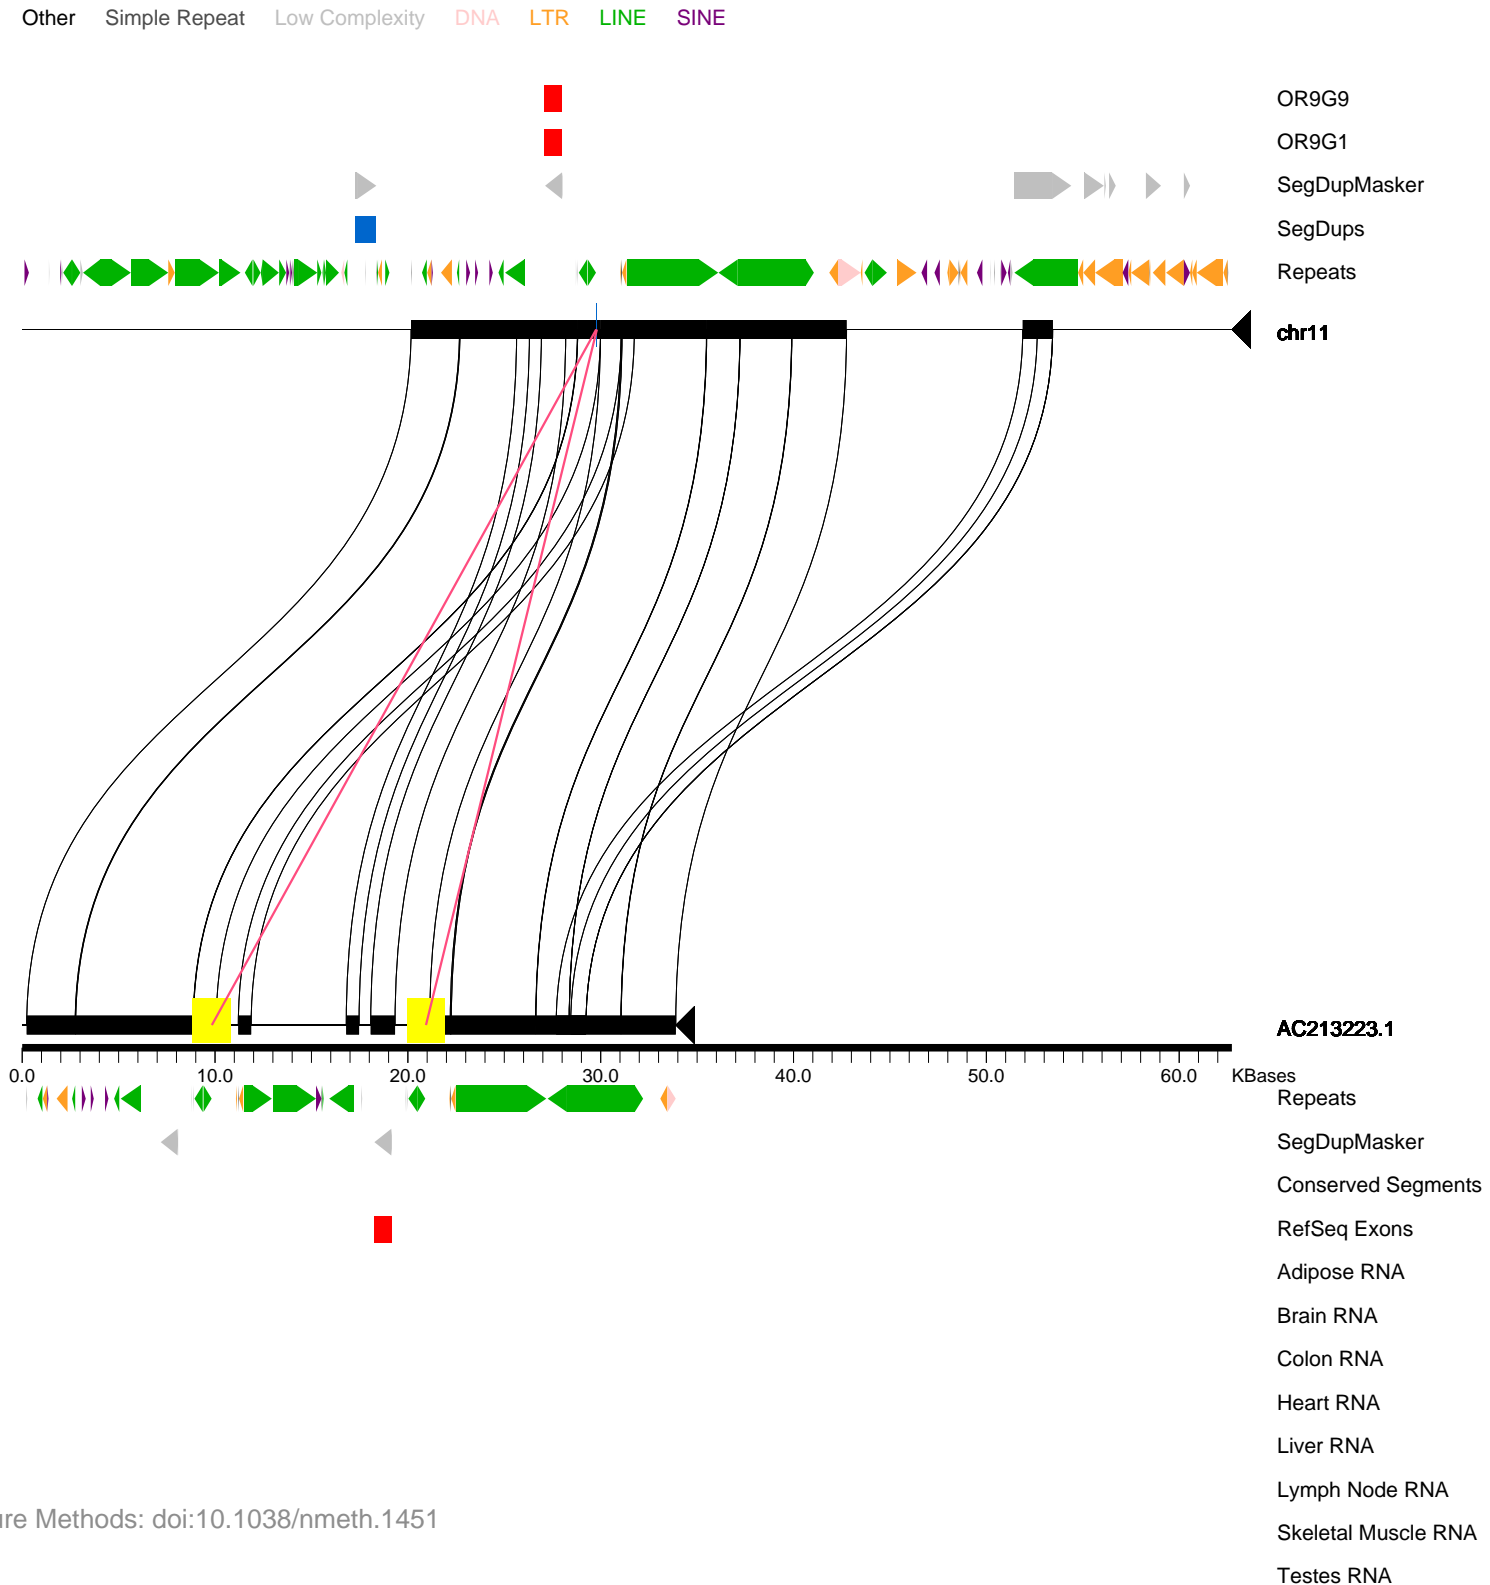

Clone file = AC213240.fa

Insertion Size: 7731

Other Simple Repeat Low Complexity DNA LTR LINE SINE

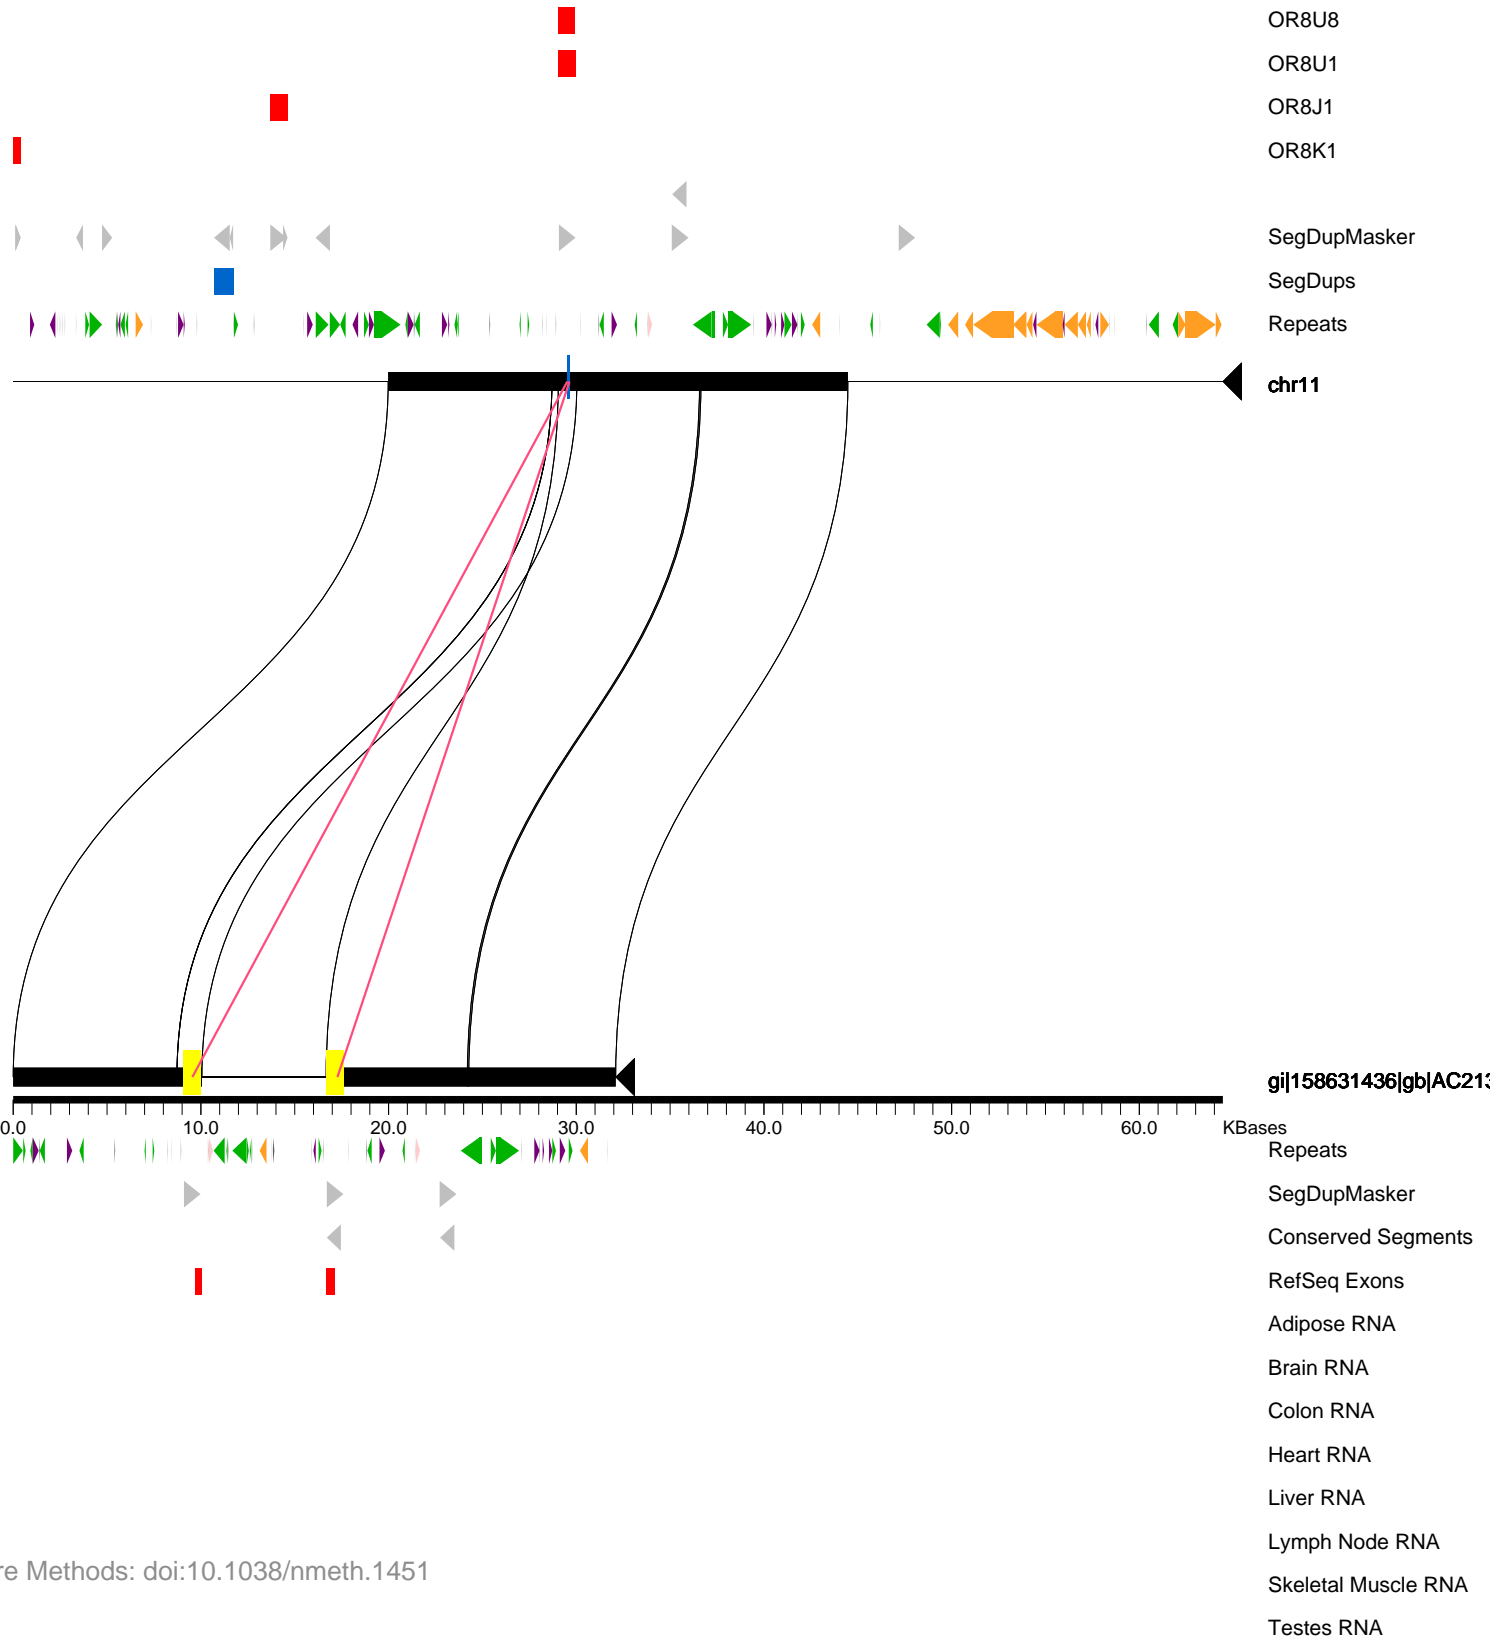

Clone file = AC213440.fa

Insertion Size: 3196

Other Simple Repeat Low Complexity DNA LTR LINE SINE

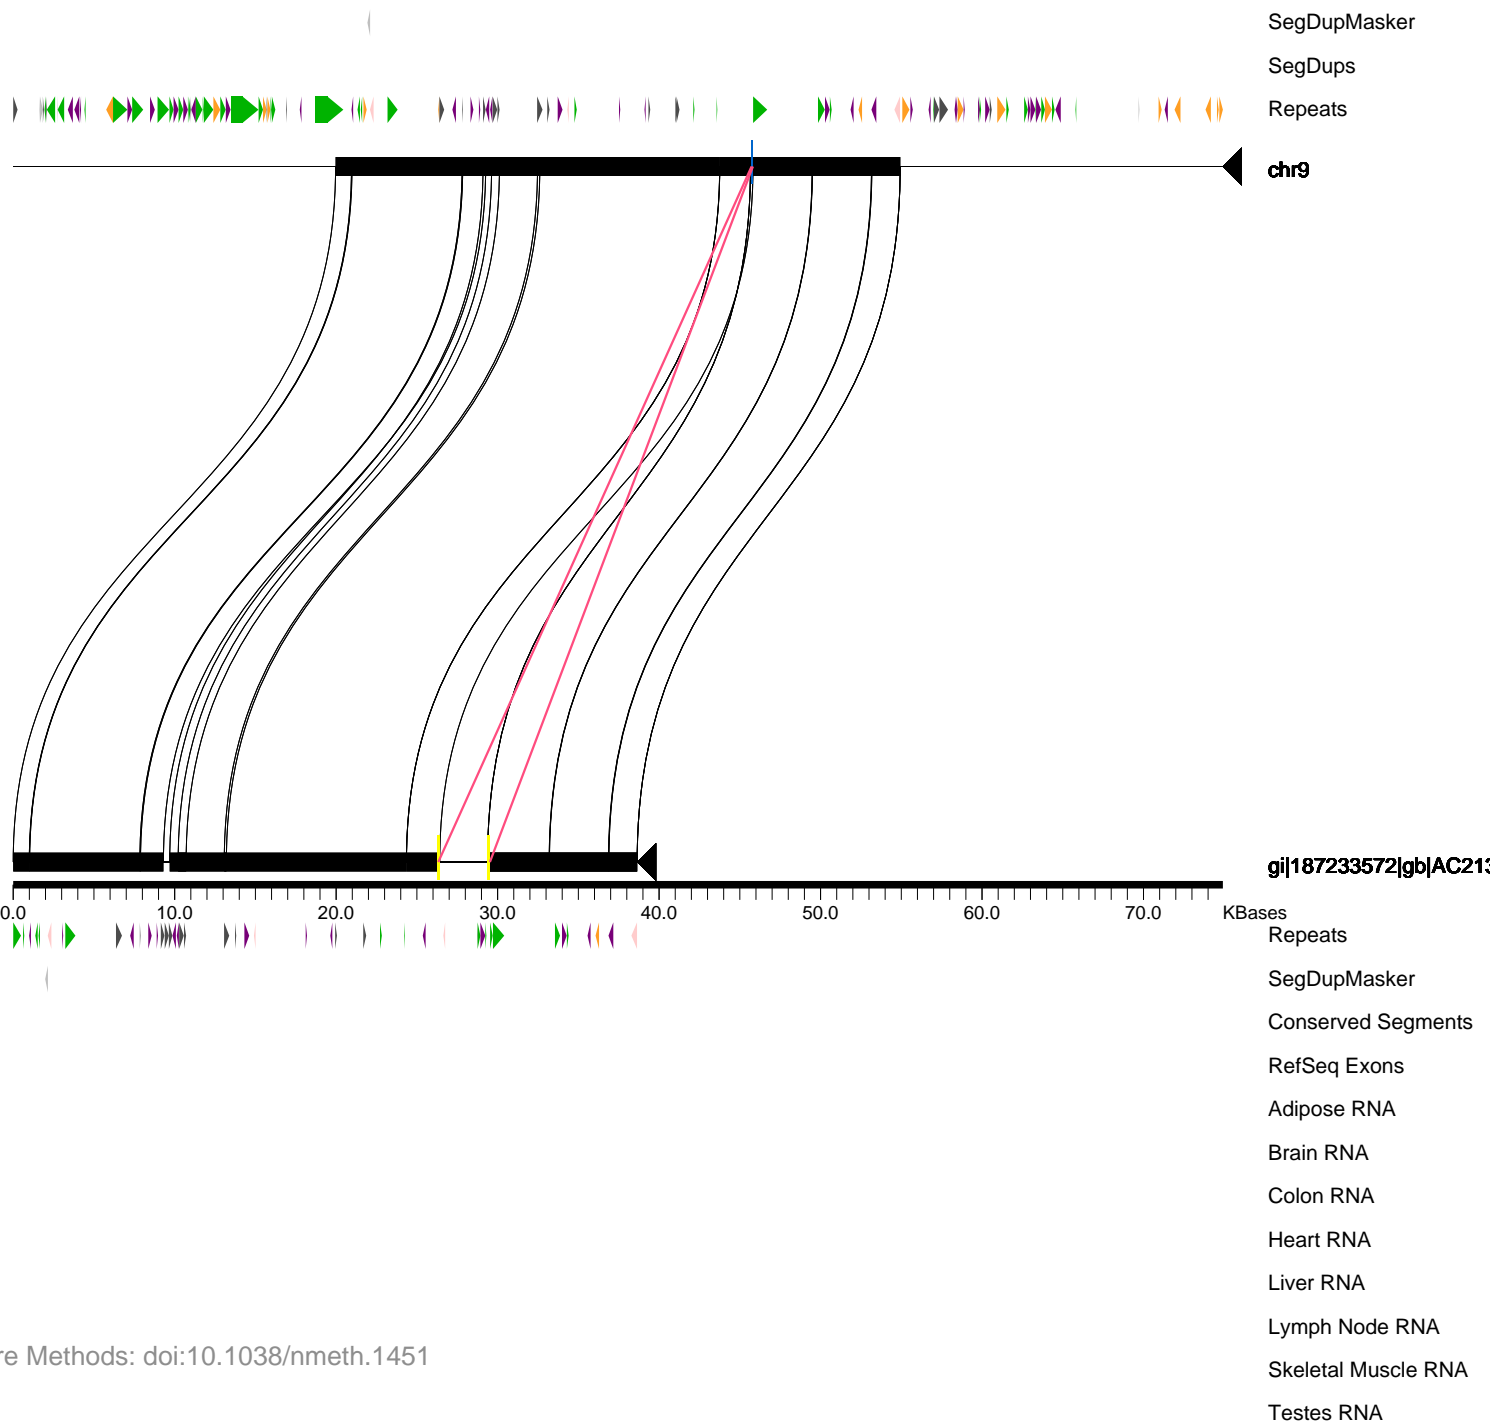

Clone file = AC213468.rc.fa

Insertion Size: 3657

Other Simple Repeat Low Complexity DNA LTR LINE SINE

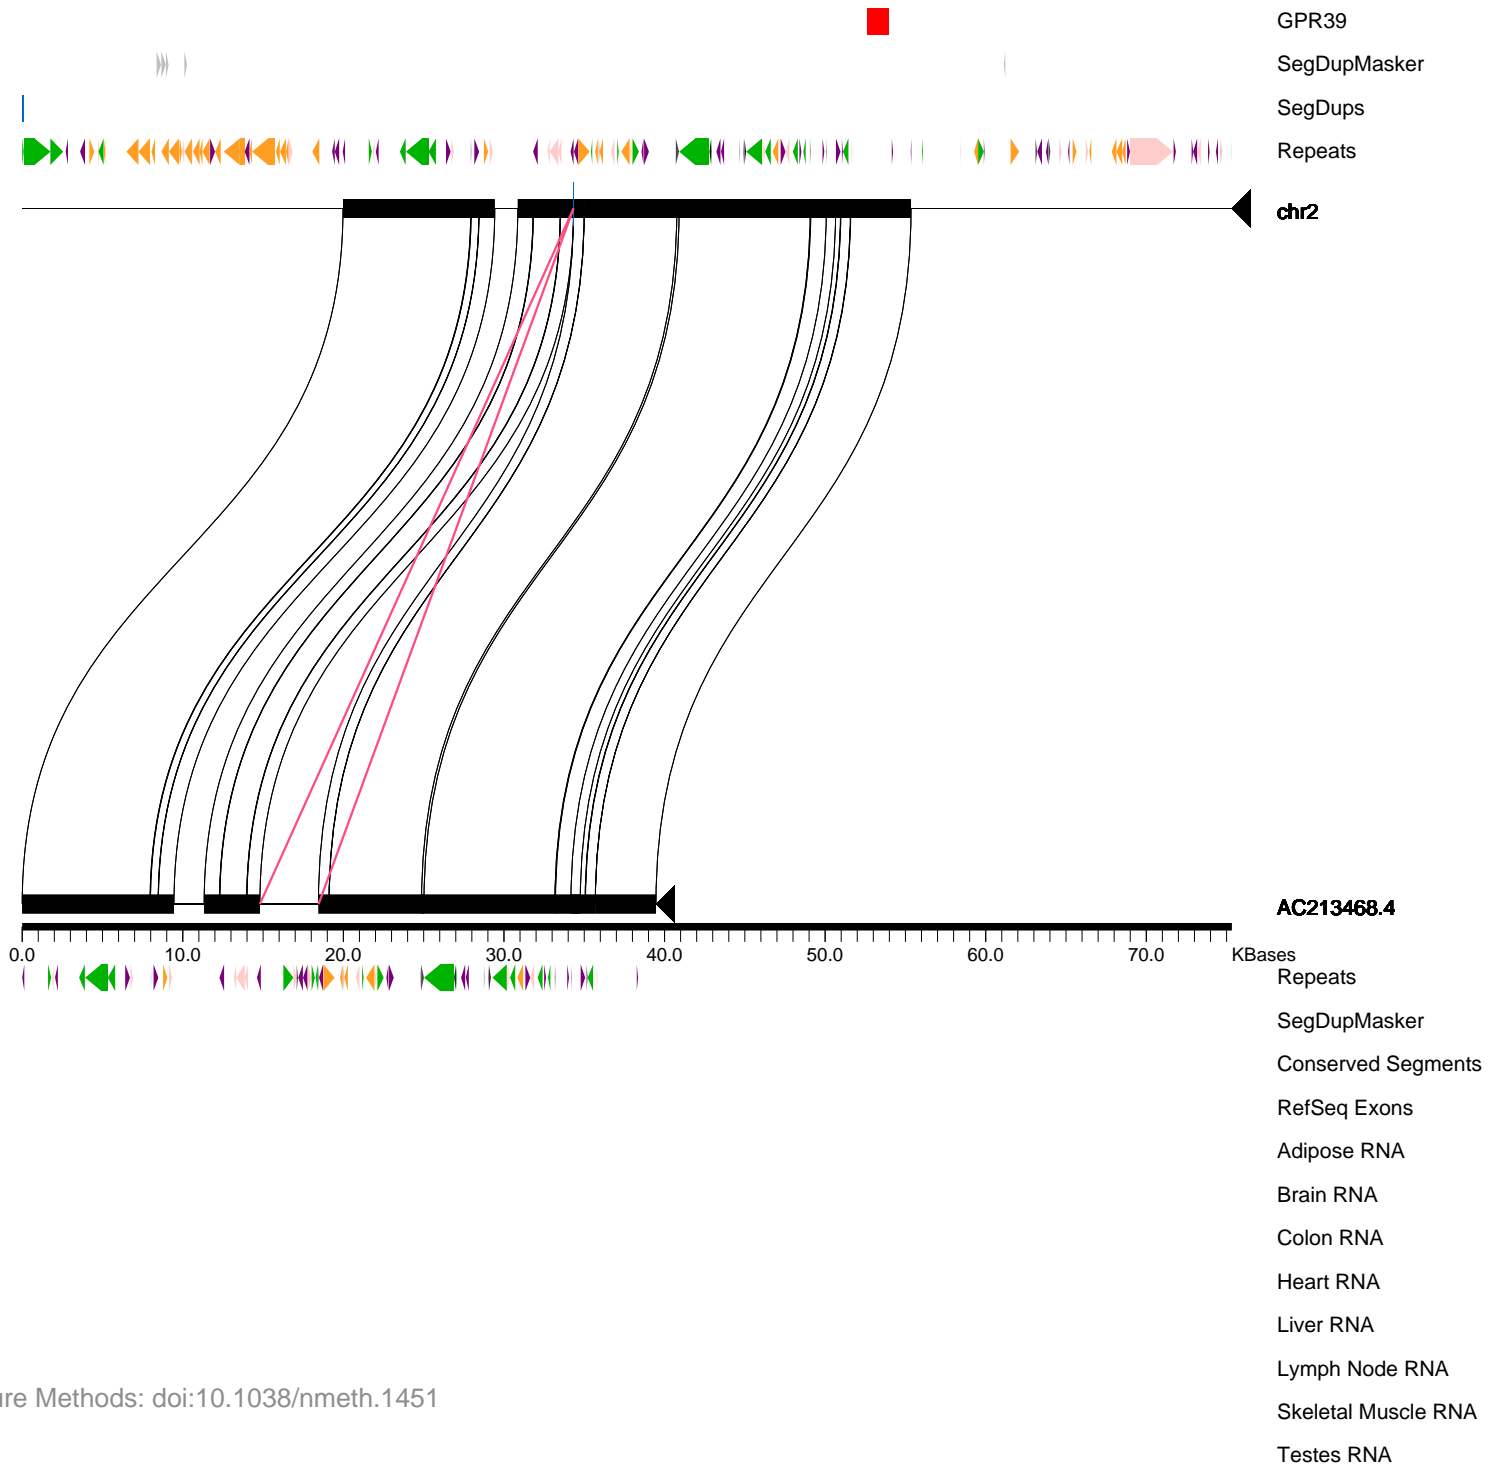



Clone file = AC213471.rc.fa

Insertion Size: 3571

Other Simple Repeat Low Complexity DNA LTR LINE SINE

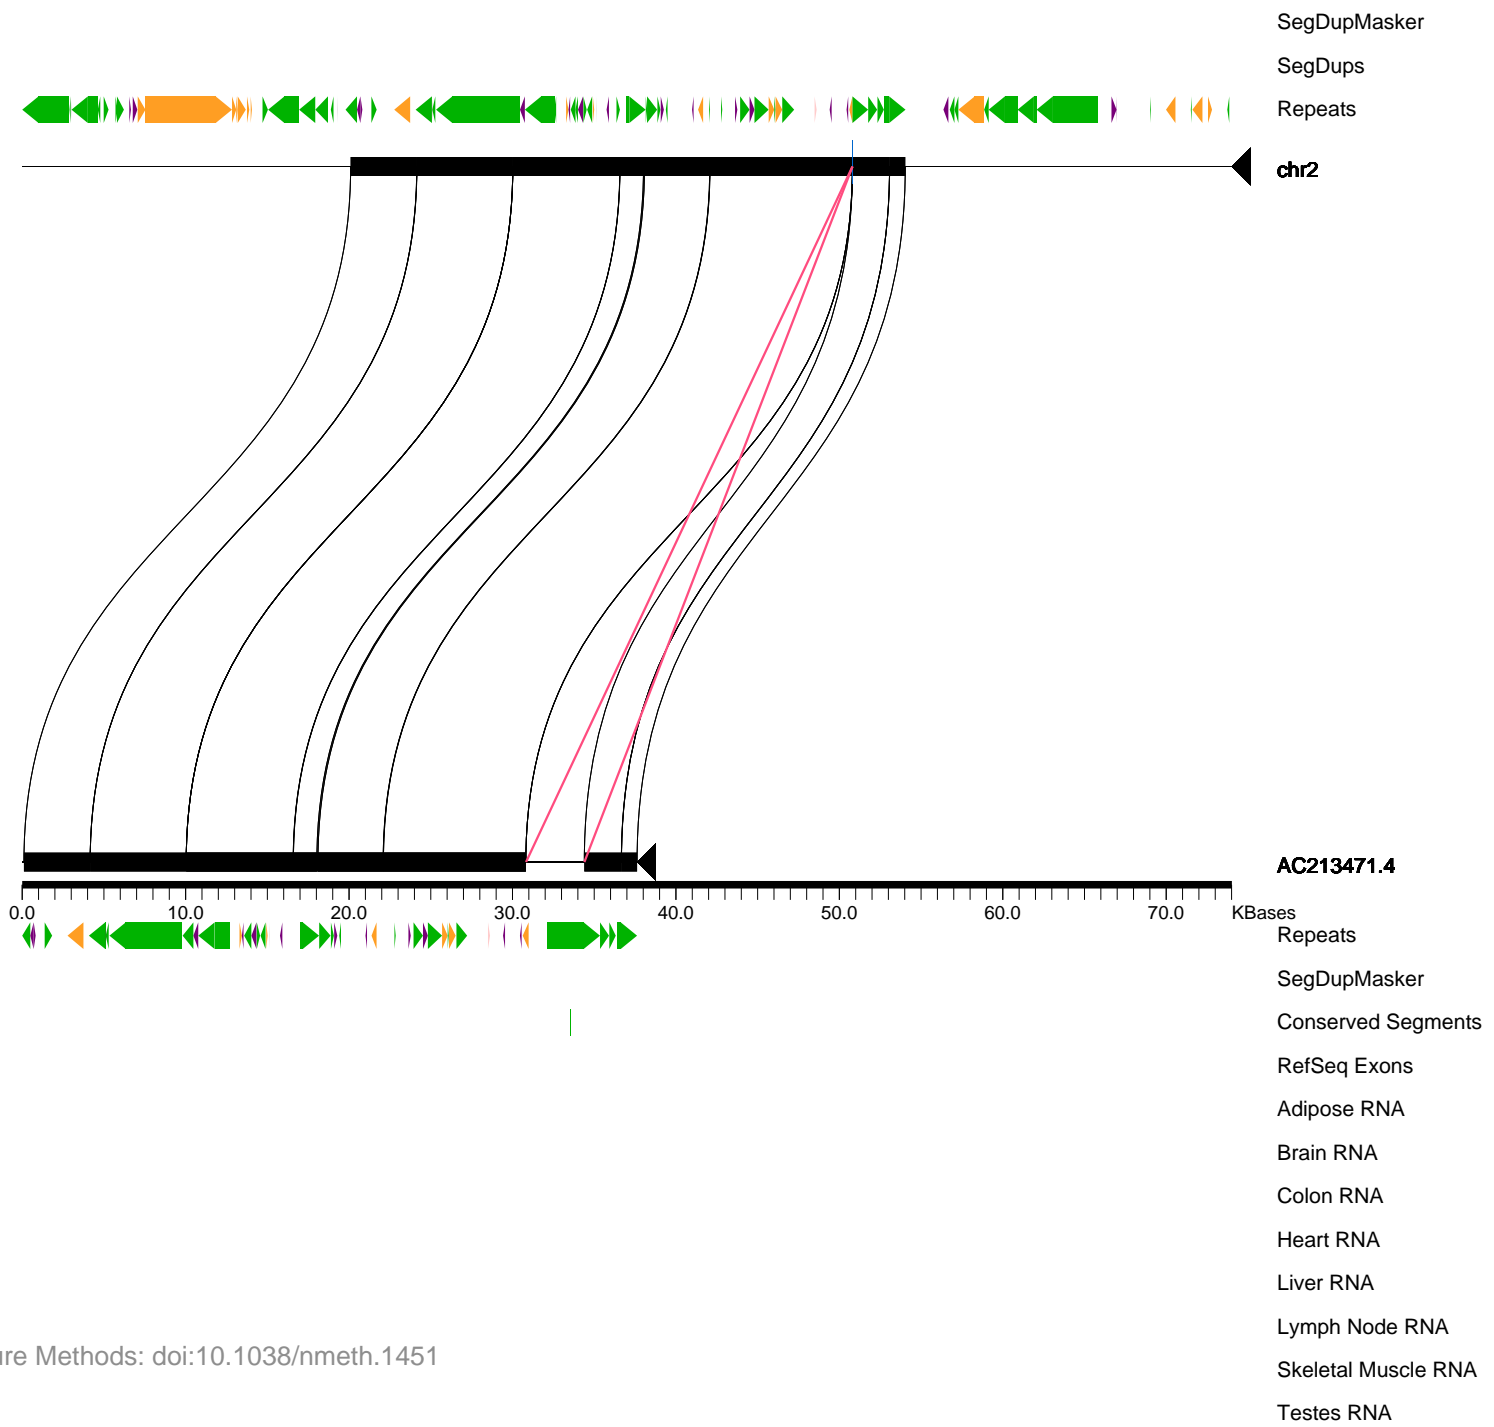

Clone file = AC213472.fa

Insertion Size: 6163

Other Simple Repeat Low Complexity DNA LTR LINE SINE

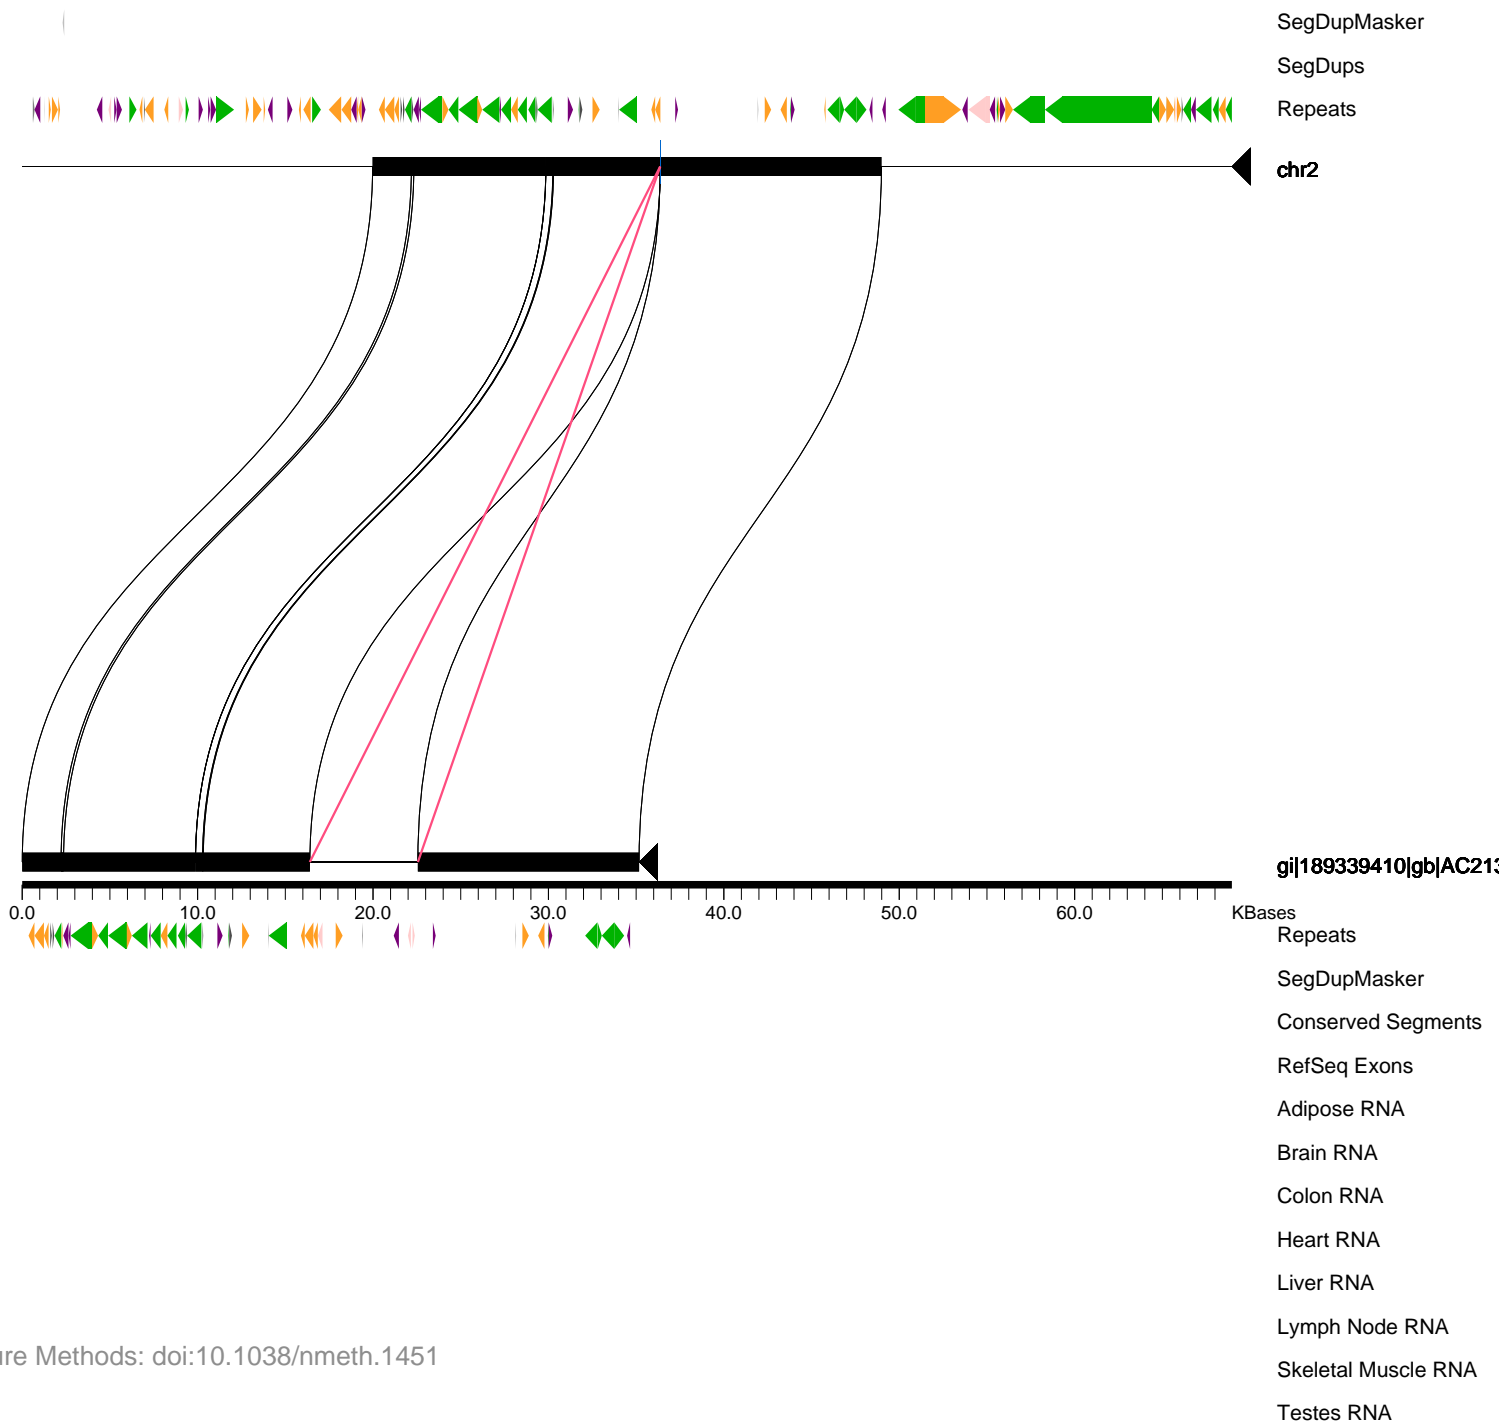

Clone file = AC214074.rc.fa

Insertion Size: 16695

Other Simple Repeat Low Complexity DNA LTR LINE SINE

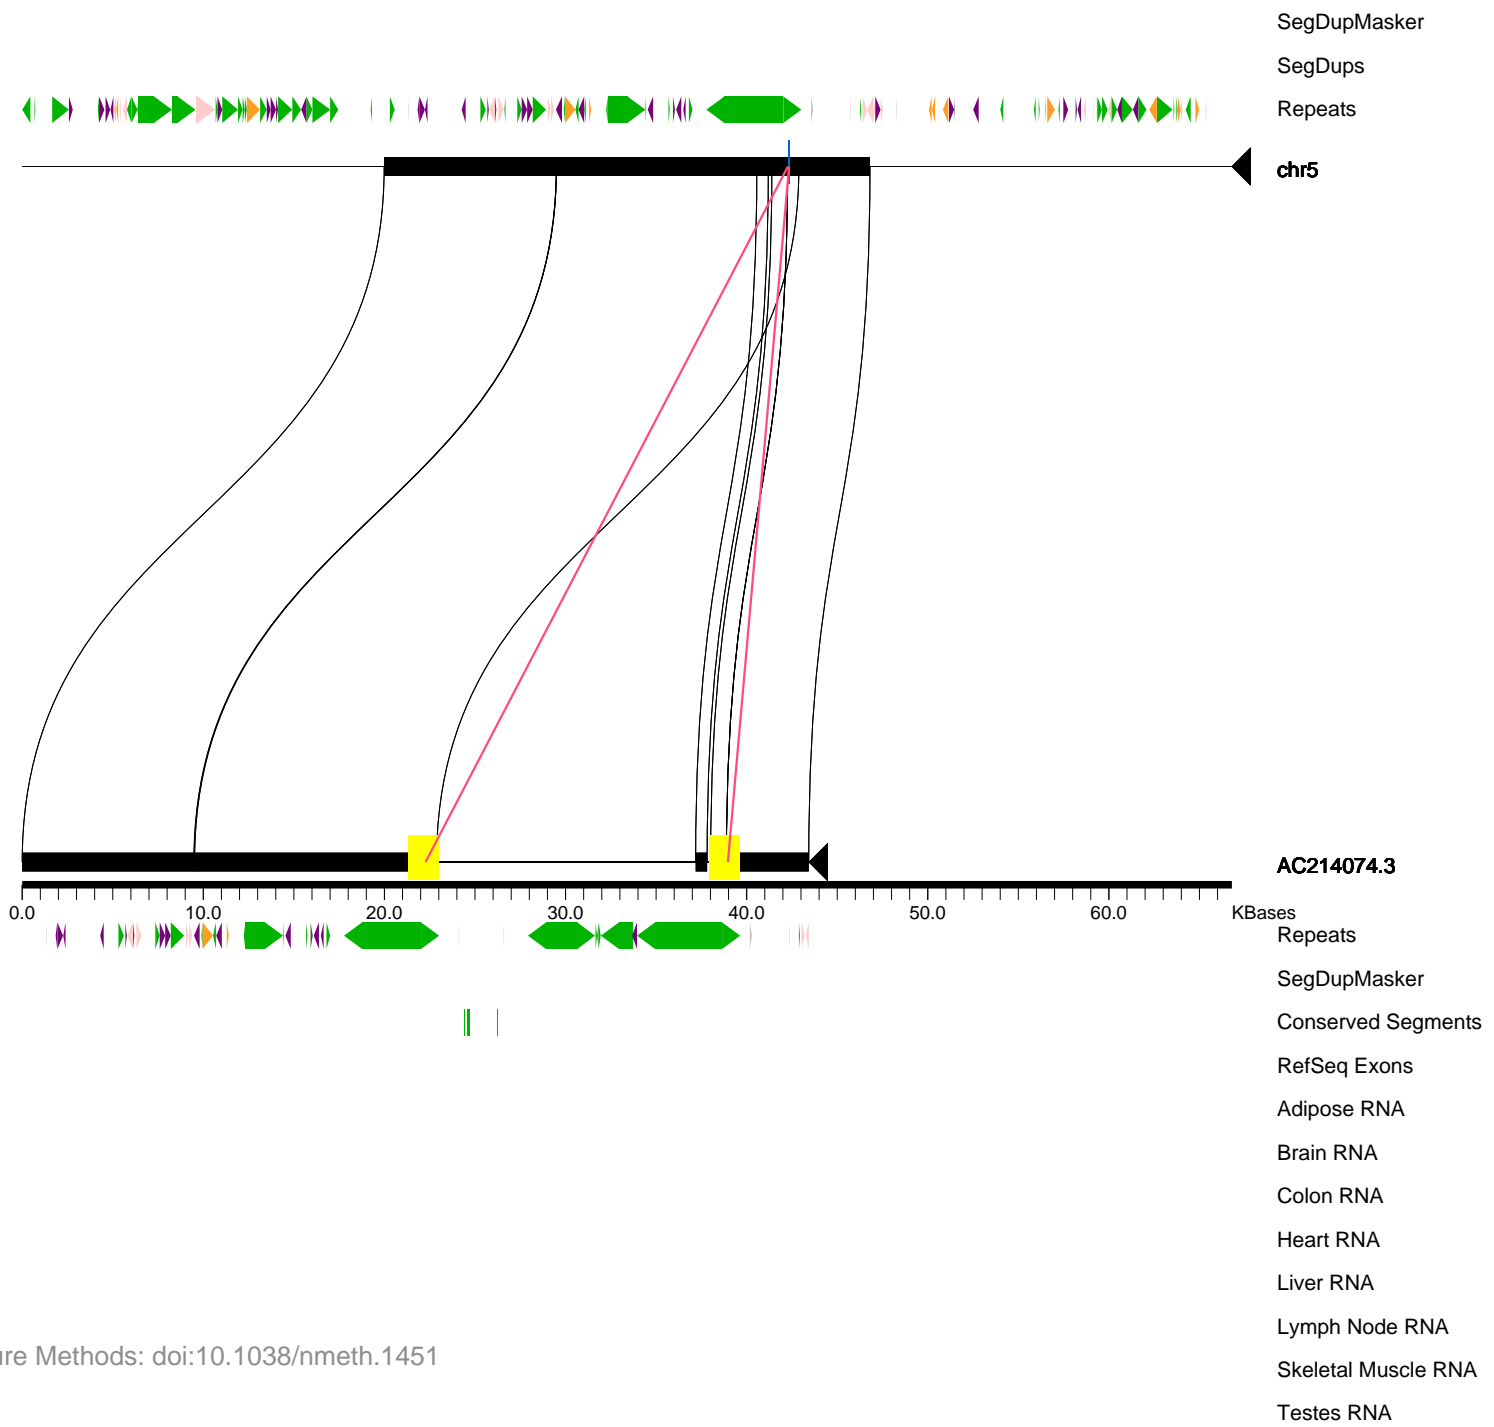

Clone file = AC214181.rc.fa

Insertion Size: 9216

Other Simple Repeat Low Complexity DNA LTR LINE SINE

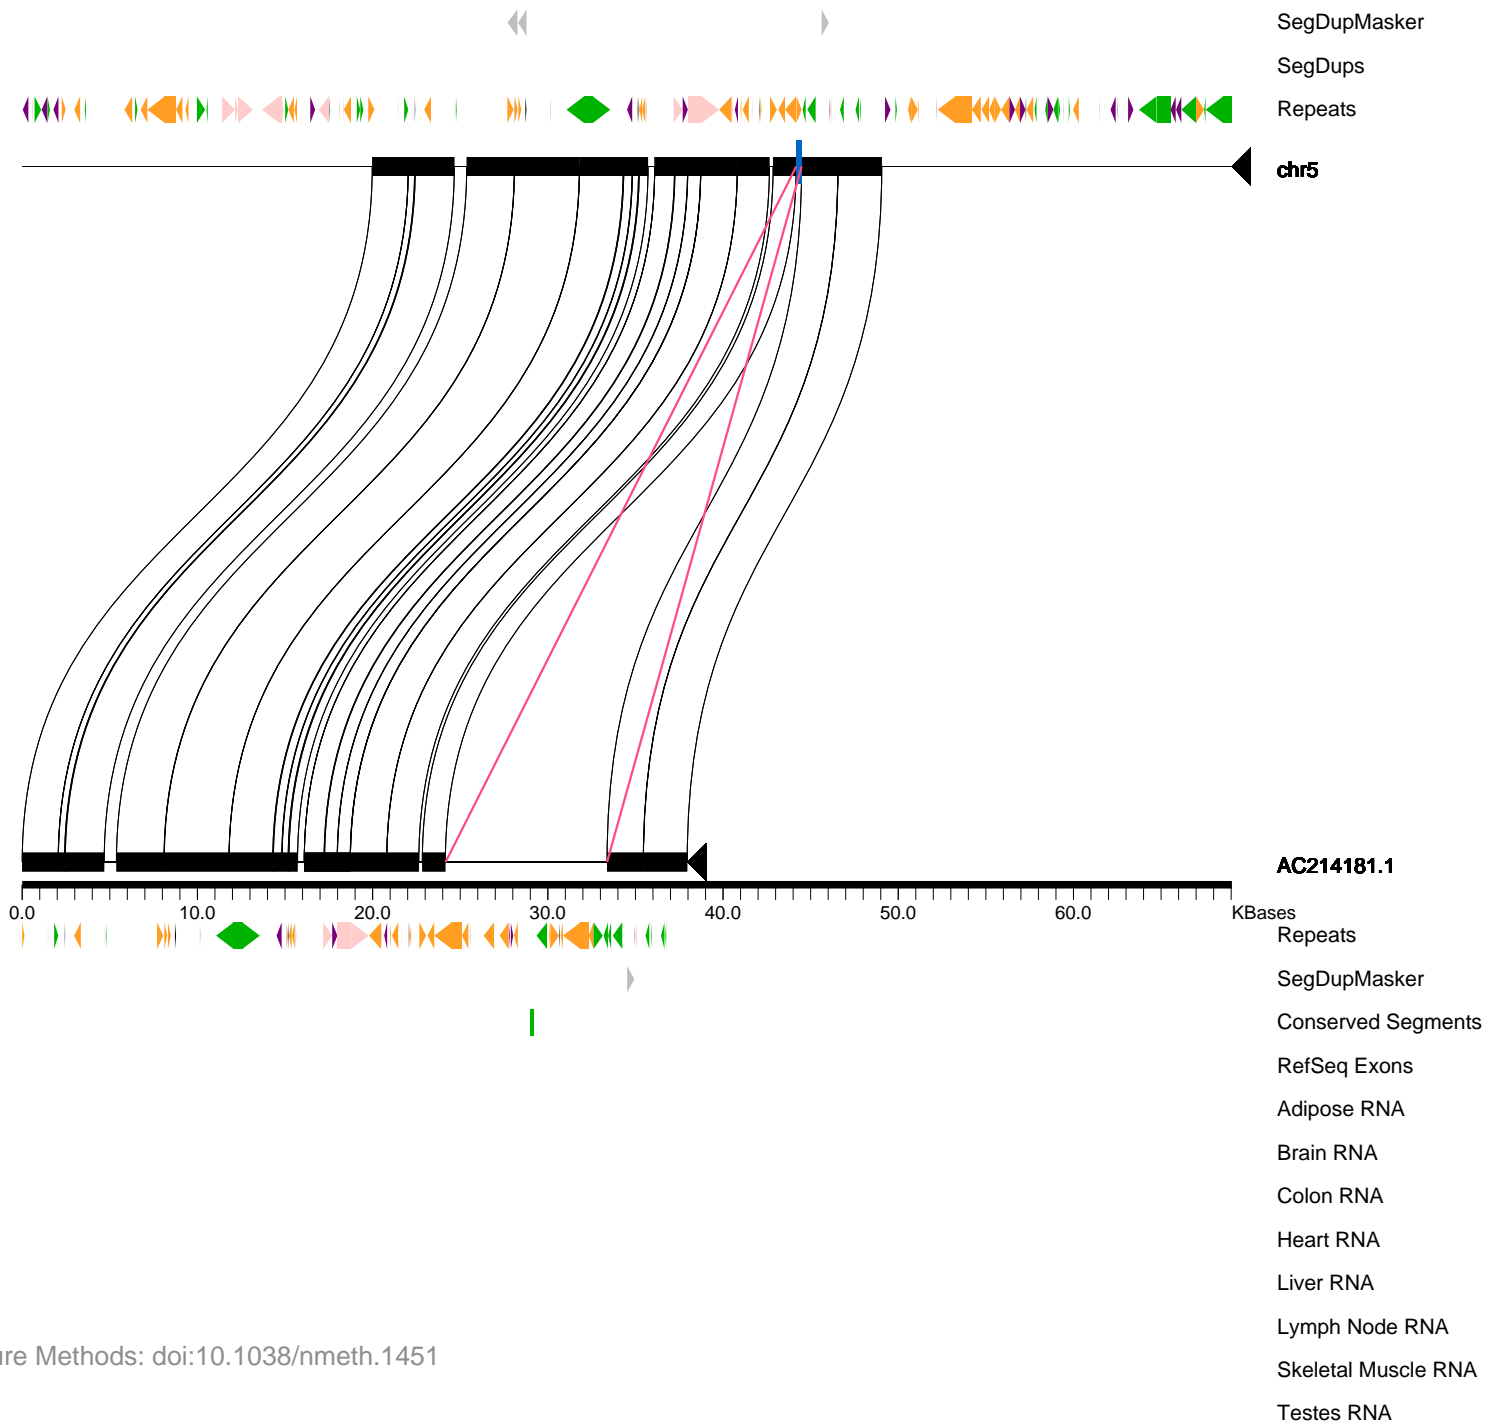

Clone file = AC214824.rc.fa

Insertion Size: 5929

Other Simple Repeat Low Complexity DNA LTR LINE SINE

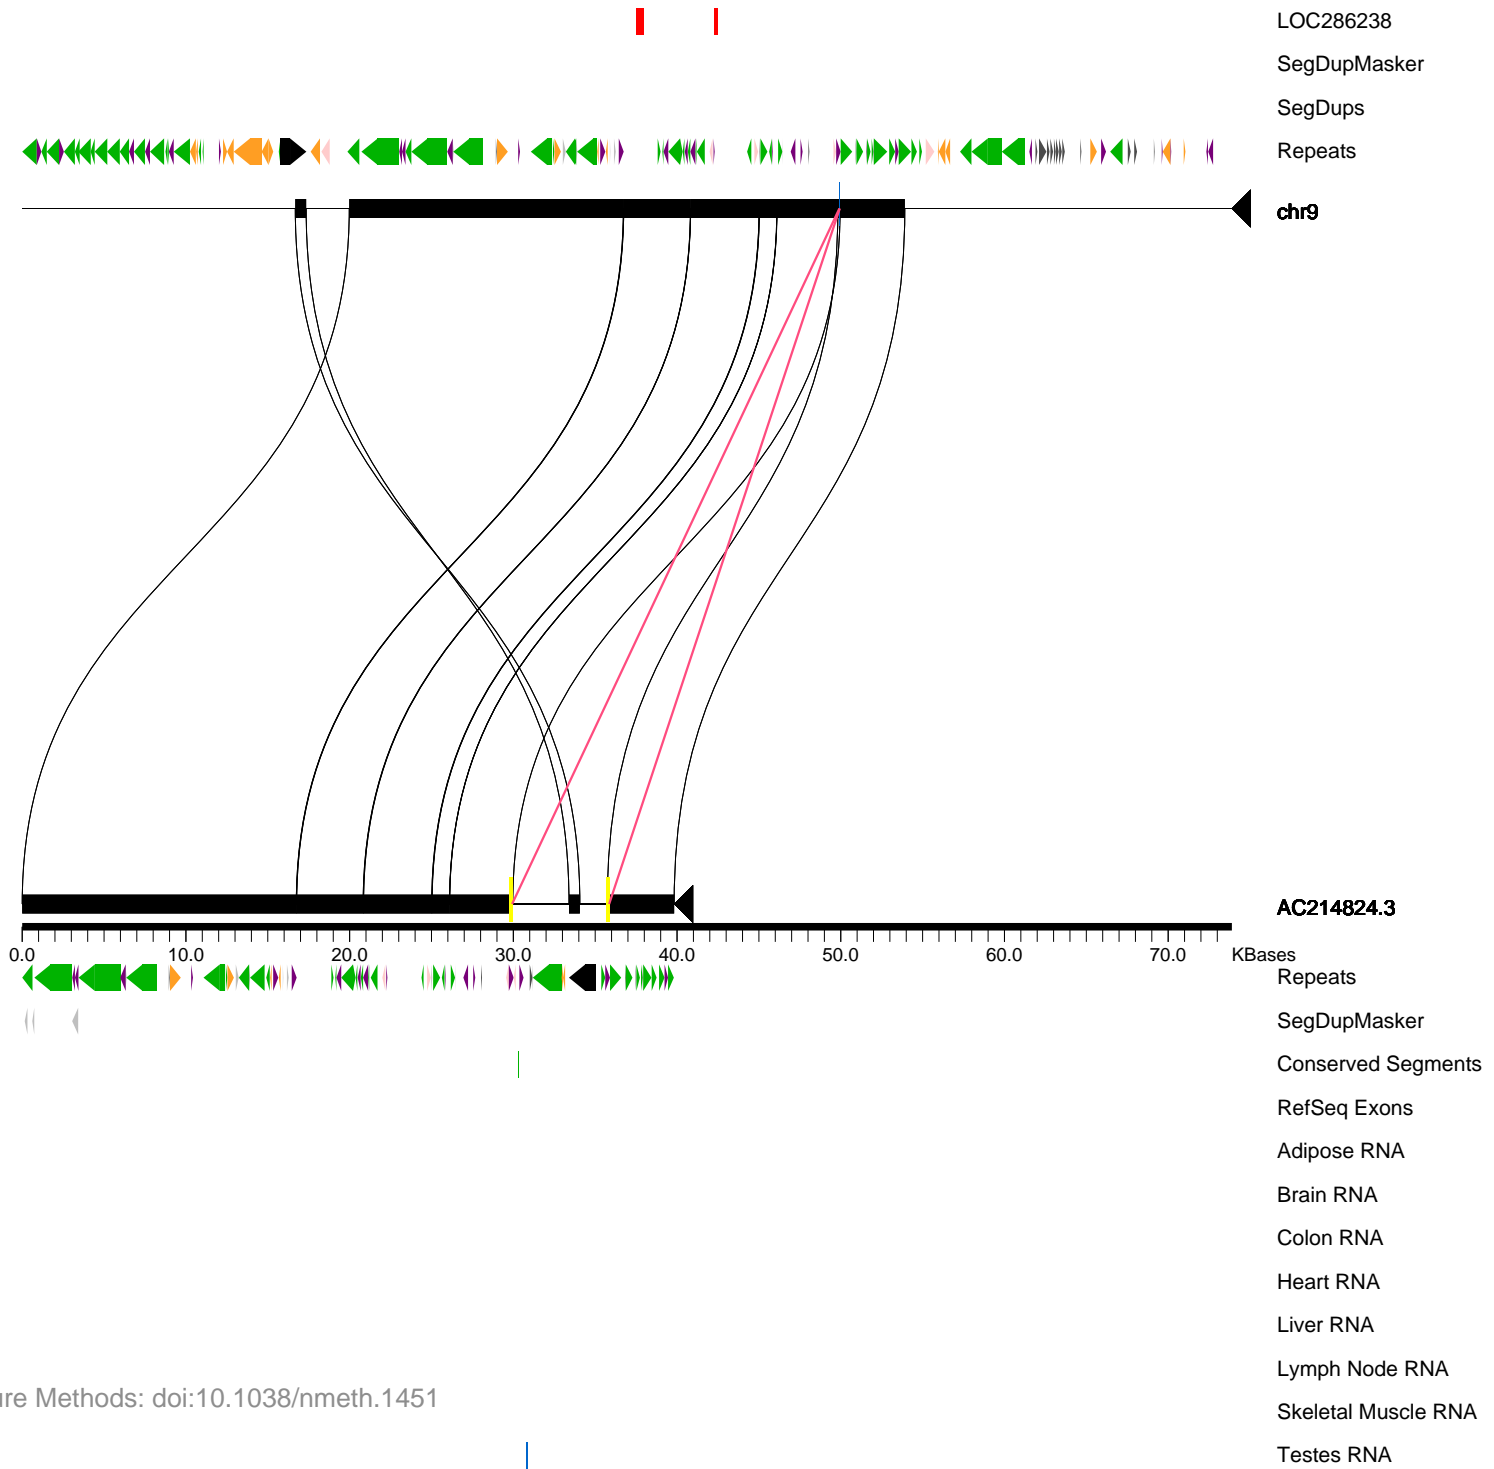

Clone file = AC215288.fa

Insertion Size: 3283

Other Simple Repeat Low Complexity DNA LTR LINE SINE

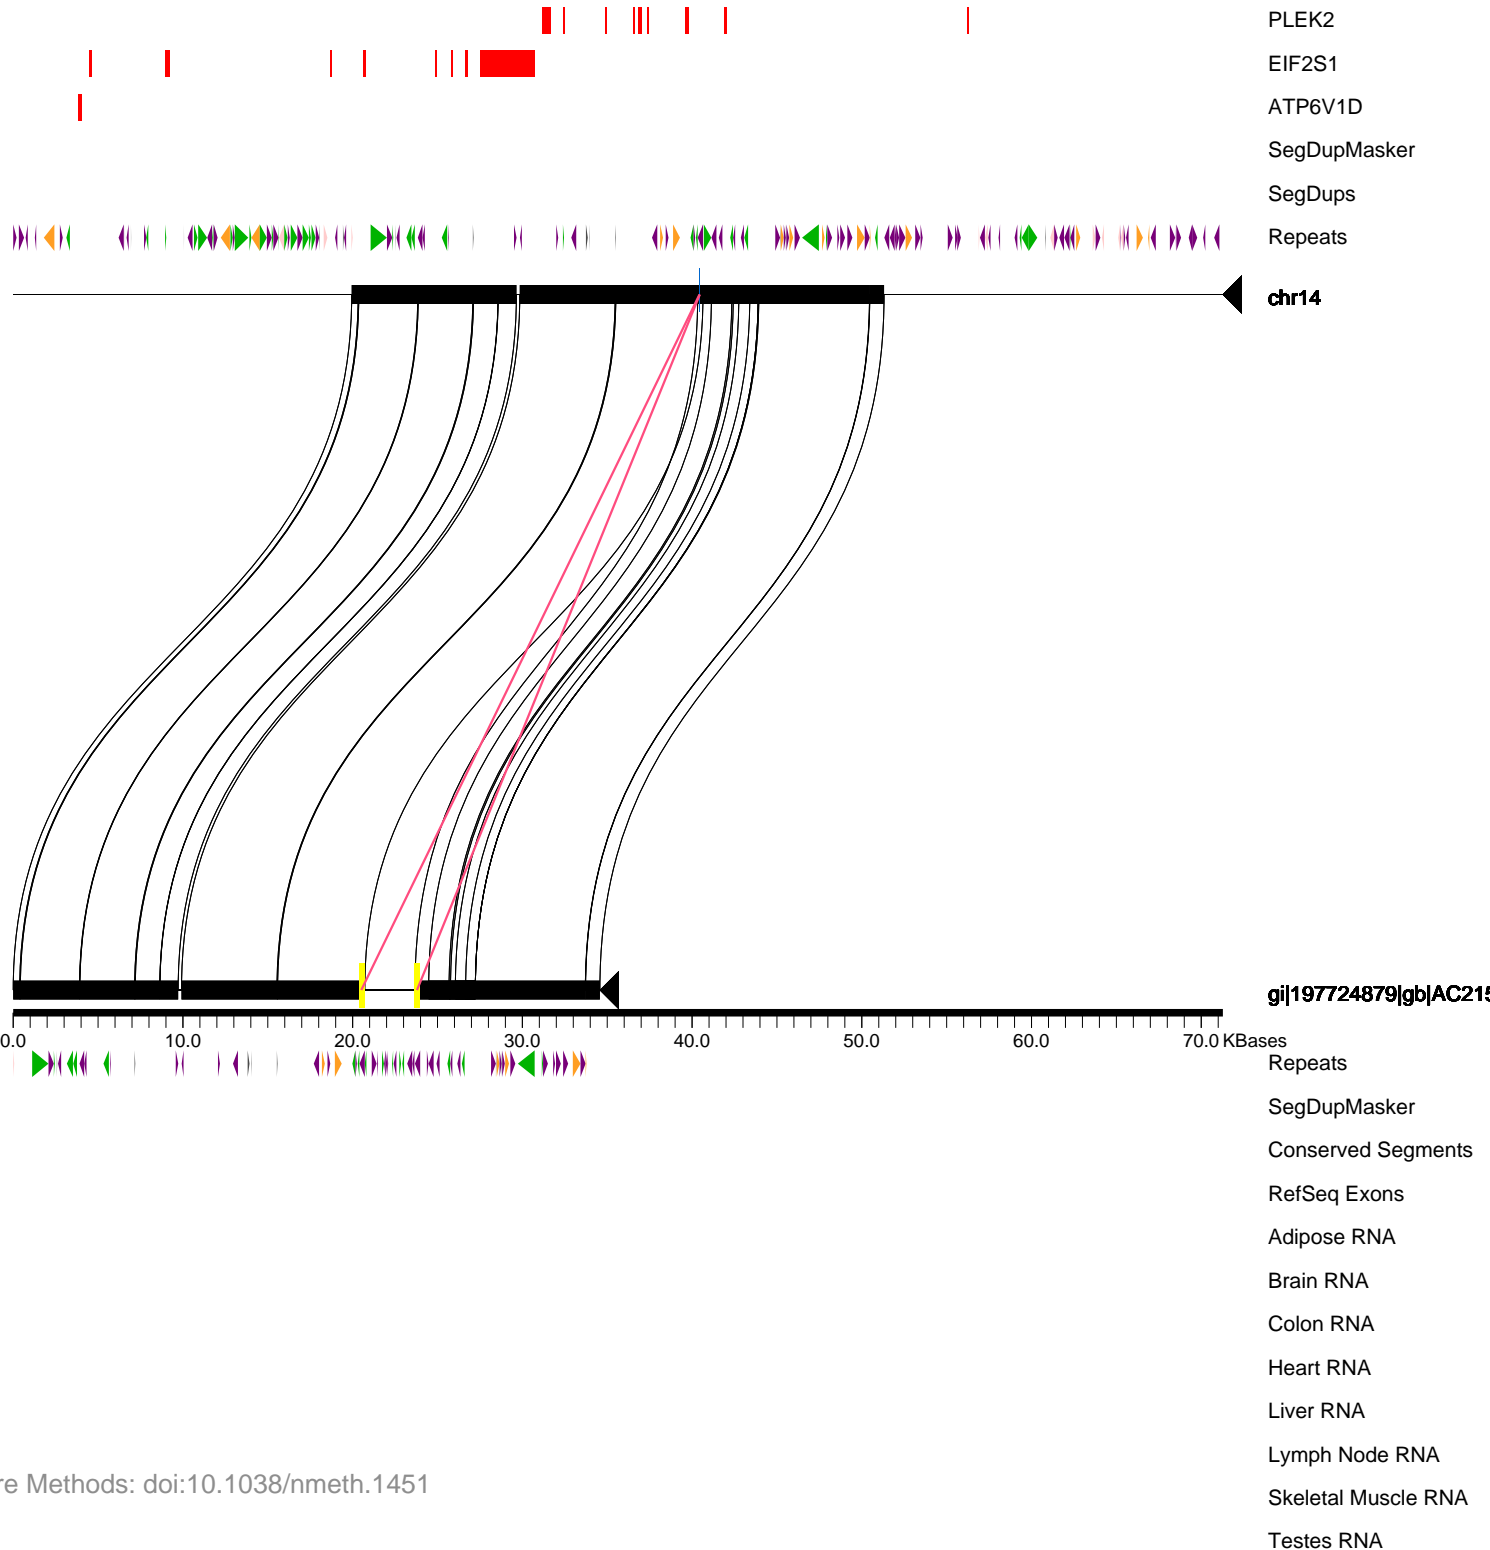

Clone file = AC215339.fa

Insertion Size: 743

Other Simple Repeat Low Complexity DNA LTR LINE SINE

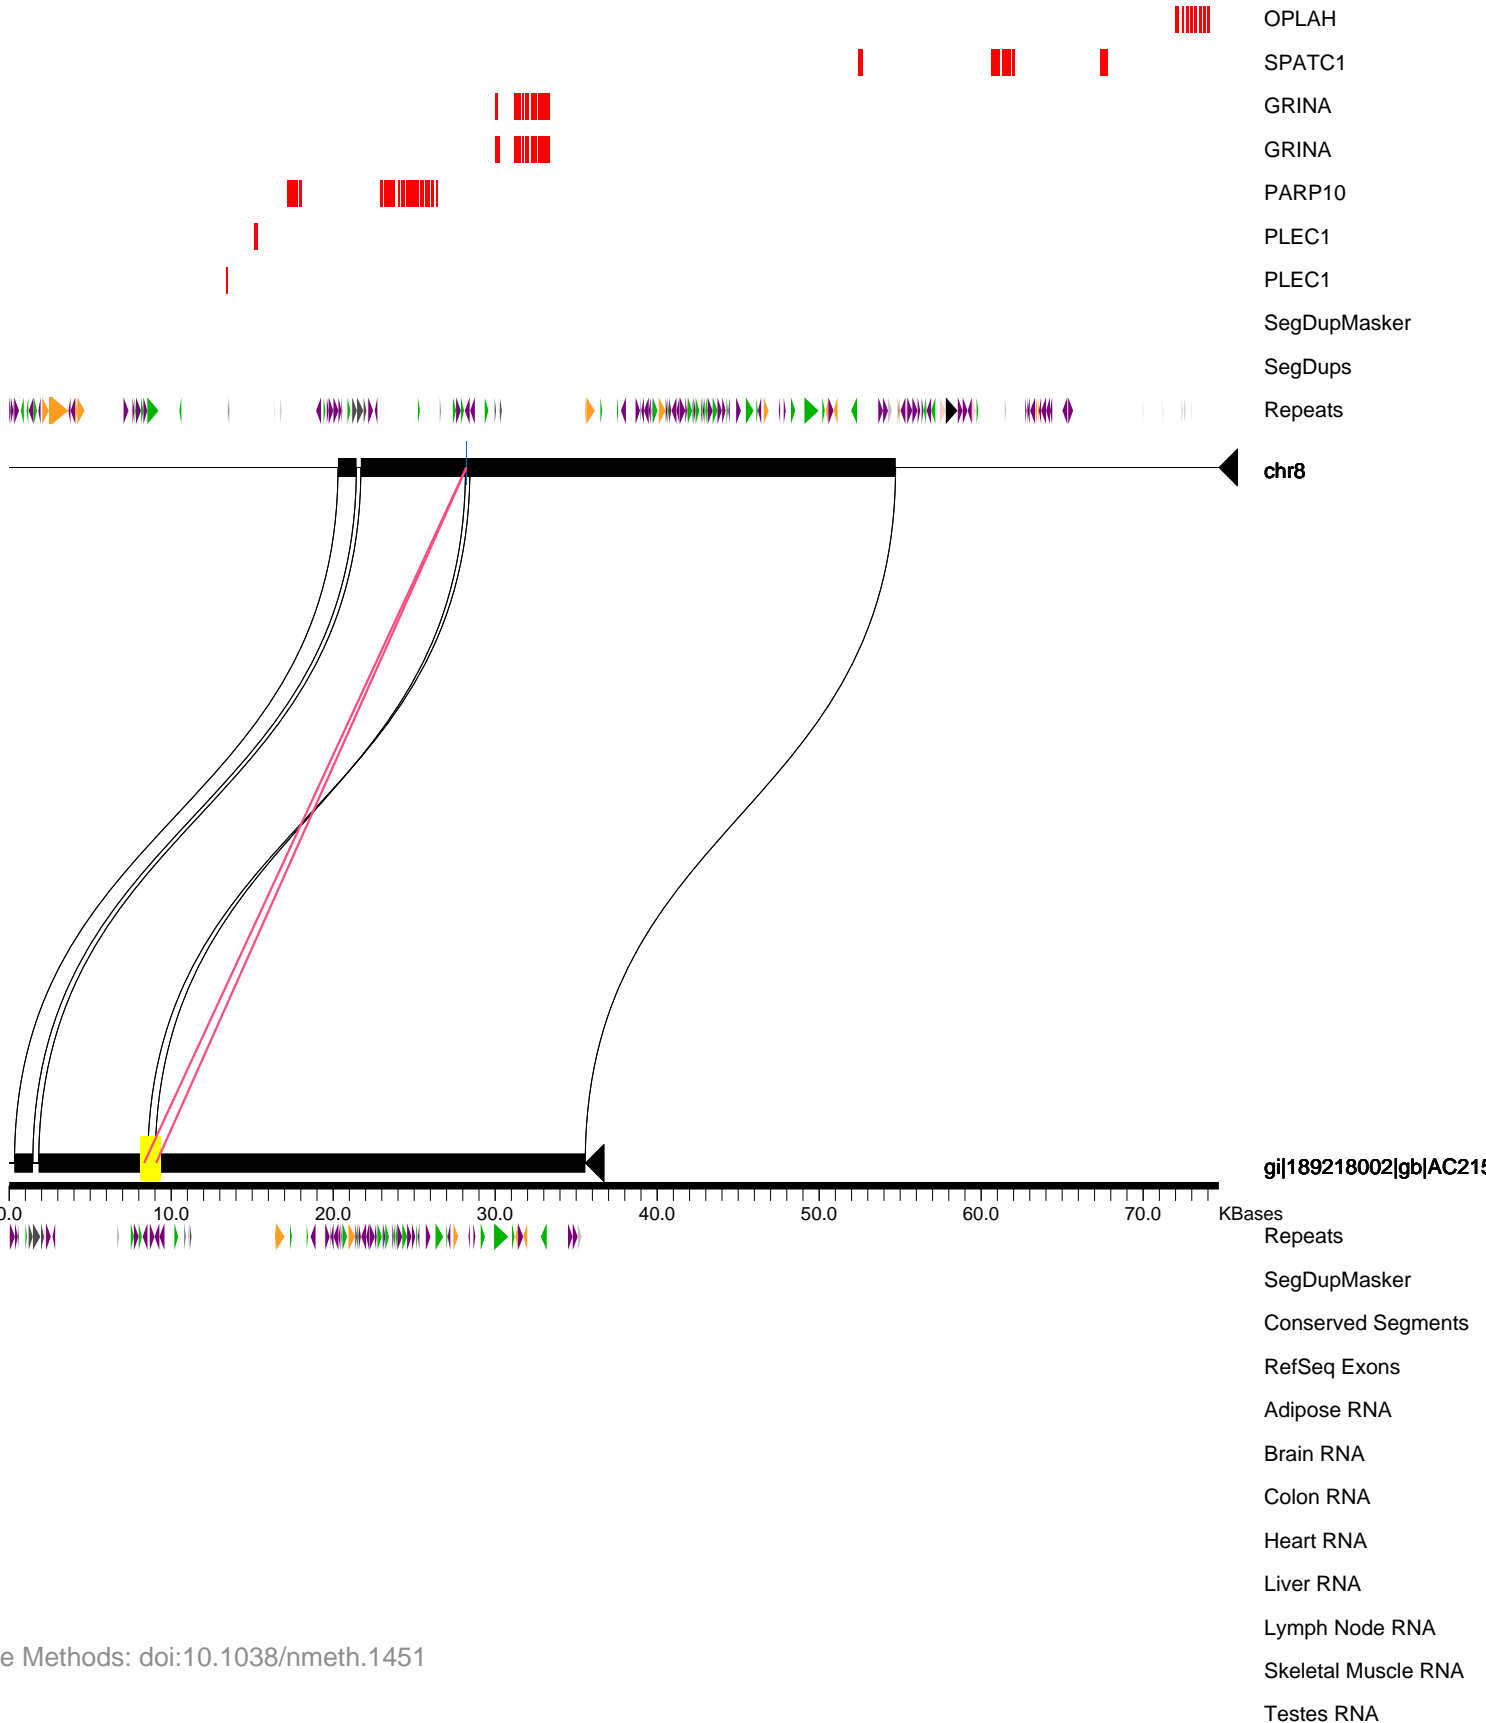

Clone file = AC215700.fa

Insertion Size: 3673

Other Simple Repeat Low Complexity DNA LTR LINE SINE

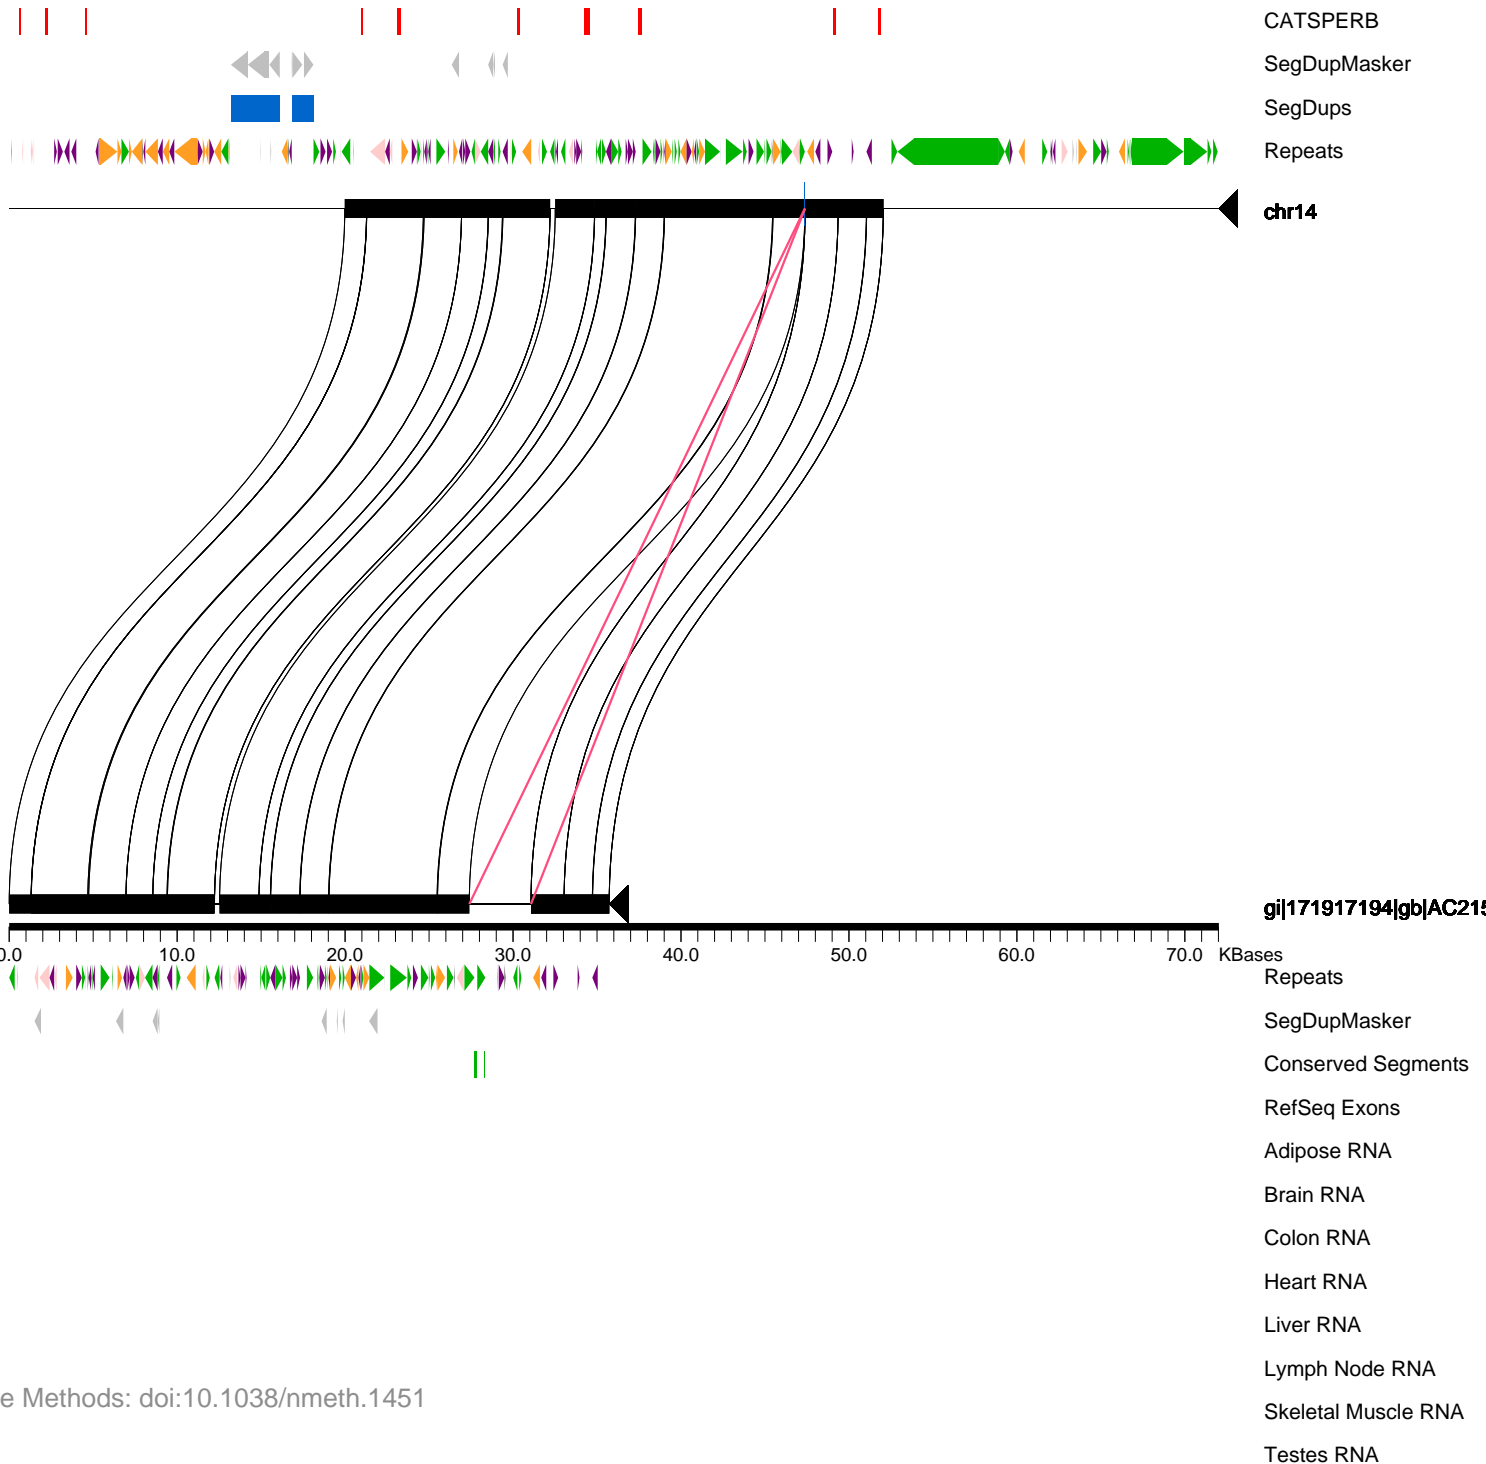



Clone file = AC215710.fa

Insertion Size: 5260

Other Simple Repeat Low Complexity DNA LTR LINE SINE

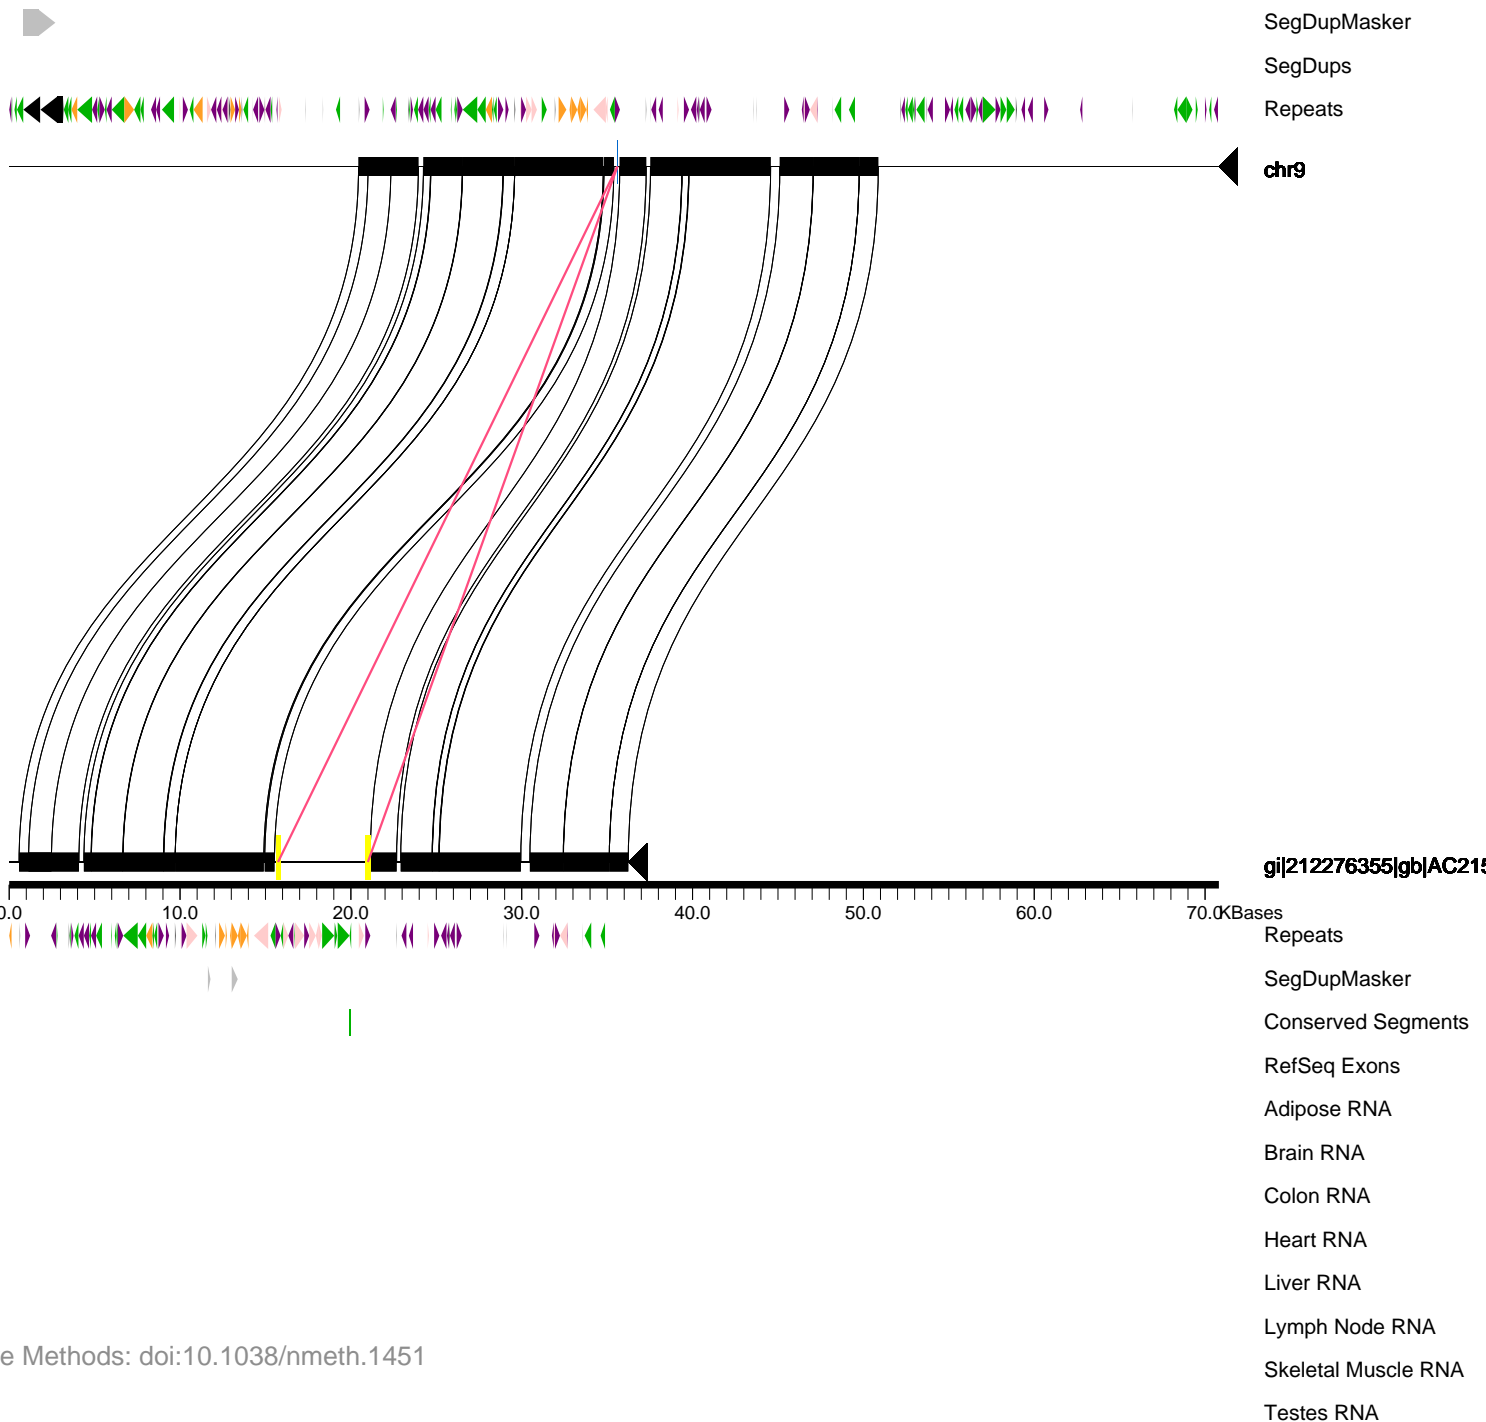

Clone file = AC215799.fa

Insertion Size: 11140

Other Simple Repeat Low Complexity DNA LTR LINE SINE

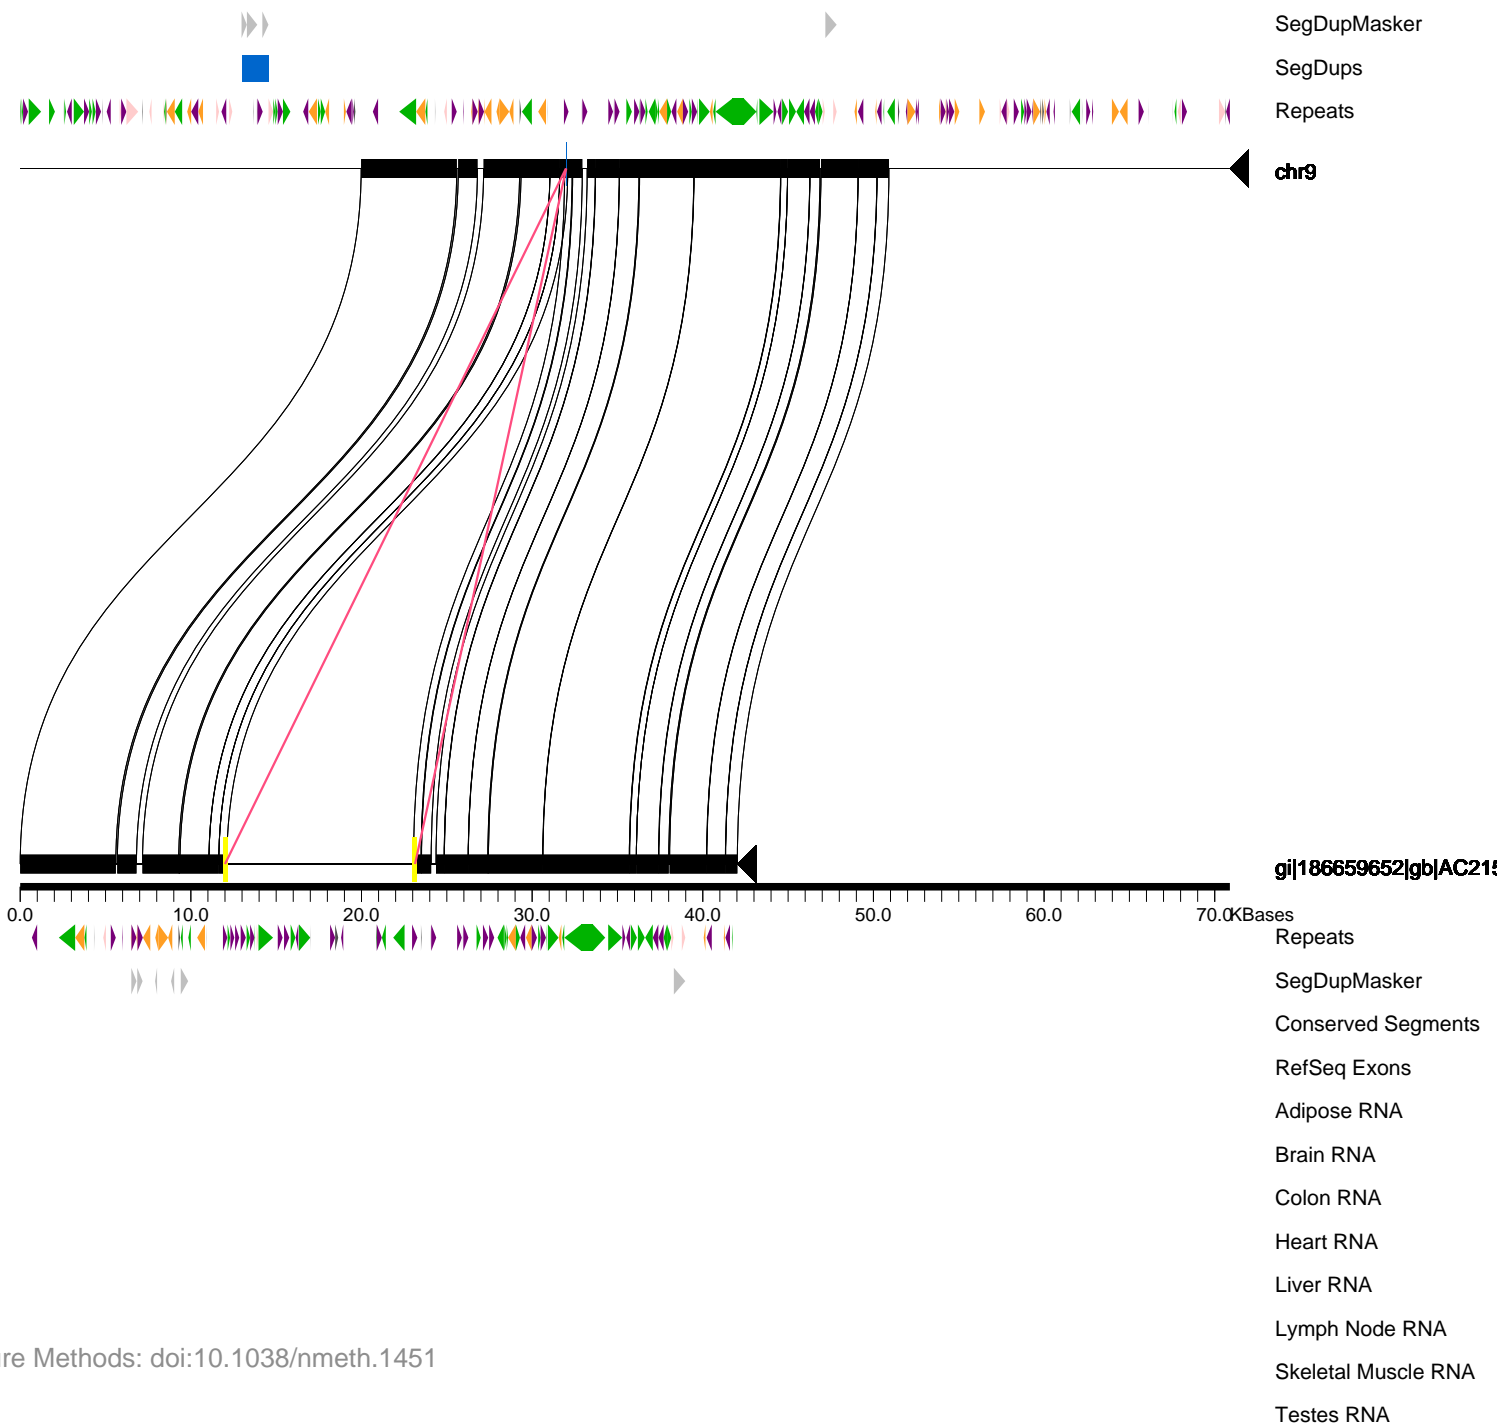

Clone file = AC216083.rc.fa

Insertion Size: 3970

Other Simple Repeat Low Complexity DNA LTR LINE SINE

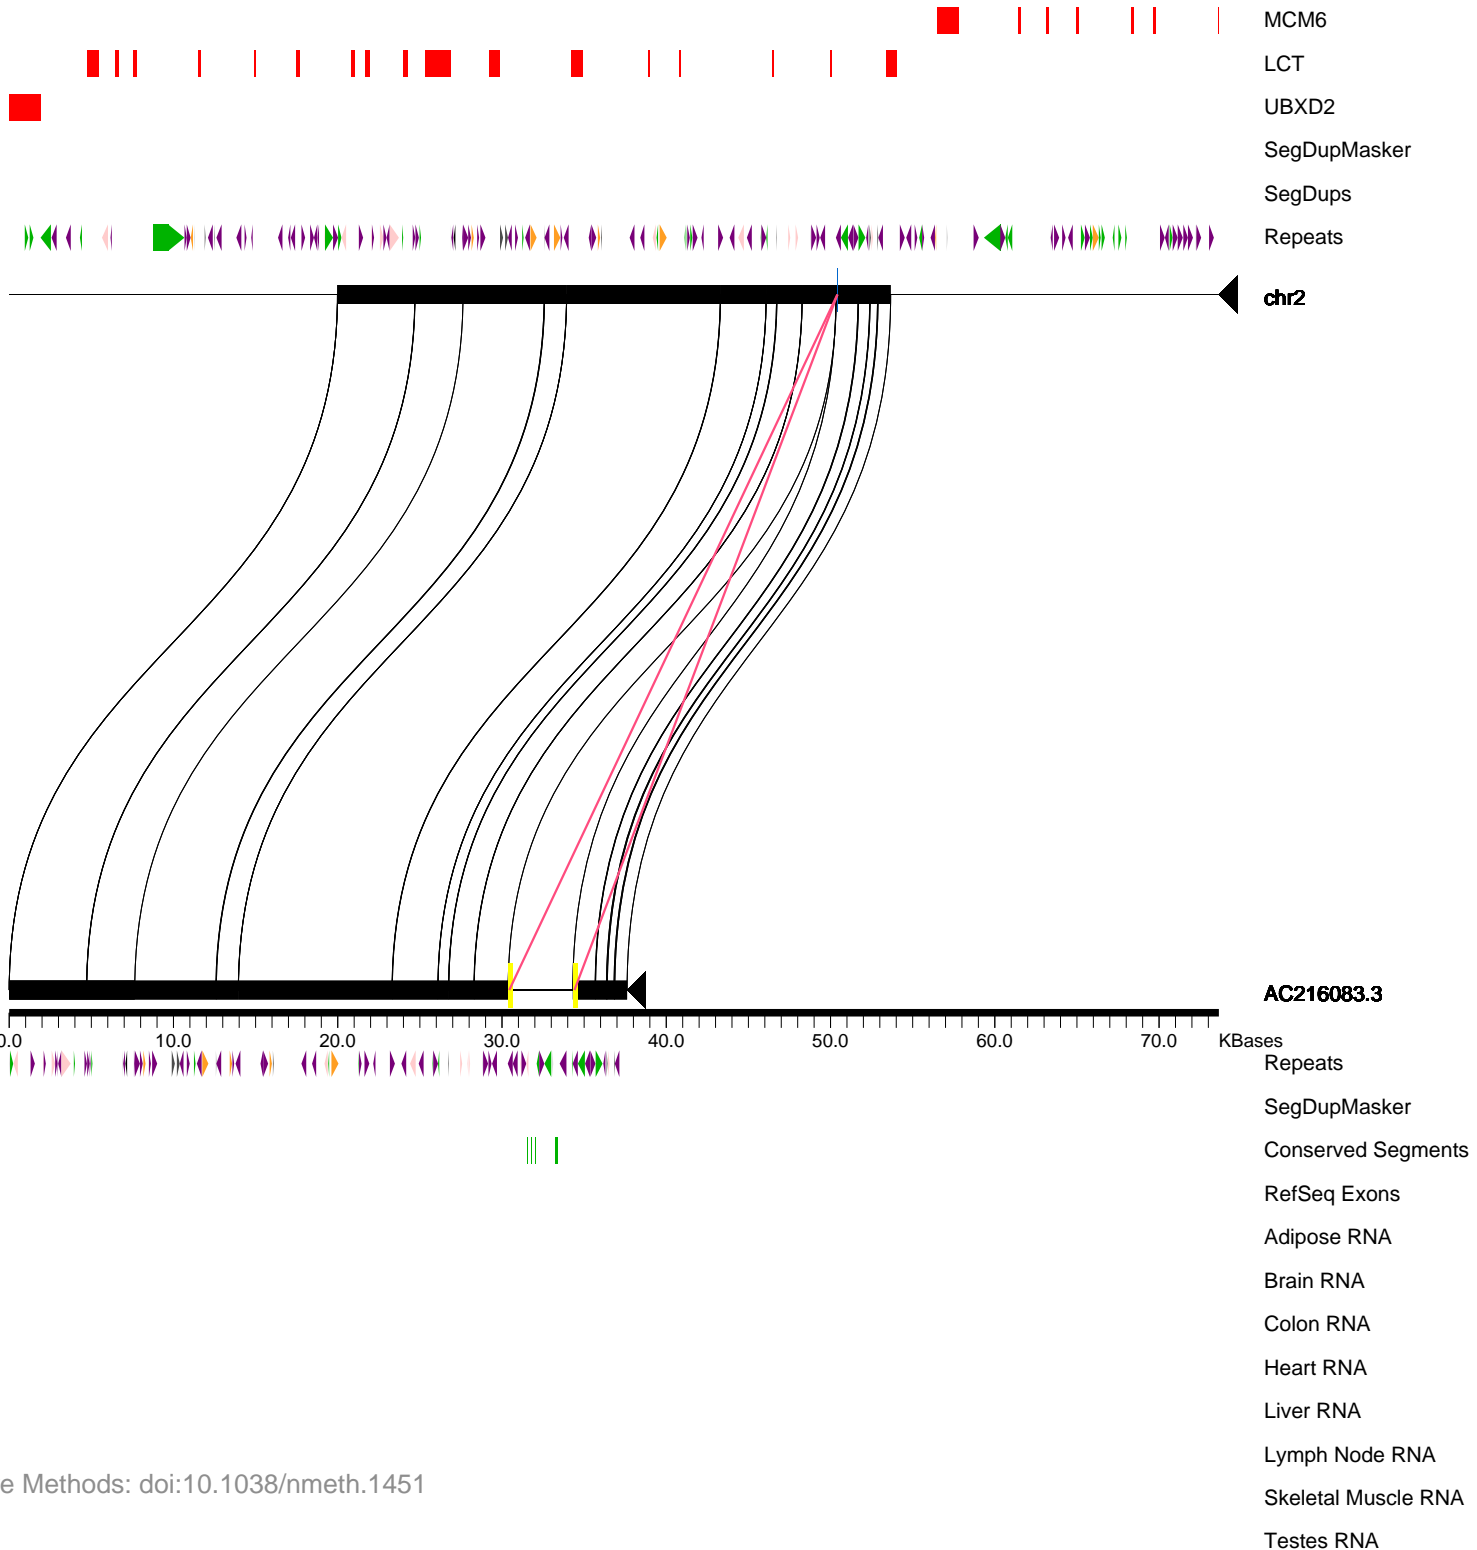

Clone file = AC216089.fa

Insertion Size: 9568

Other Simple Repeat Low Complexity DNA LTR LINE SINE

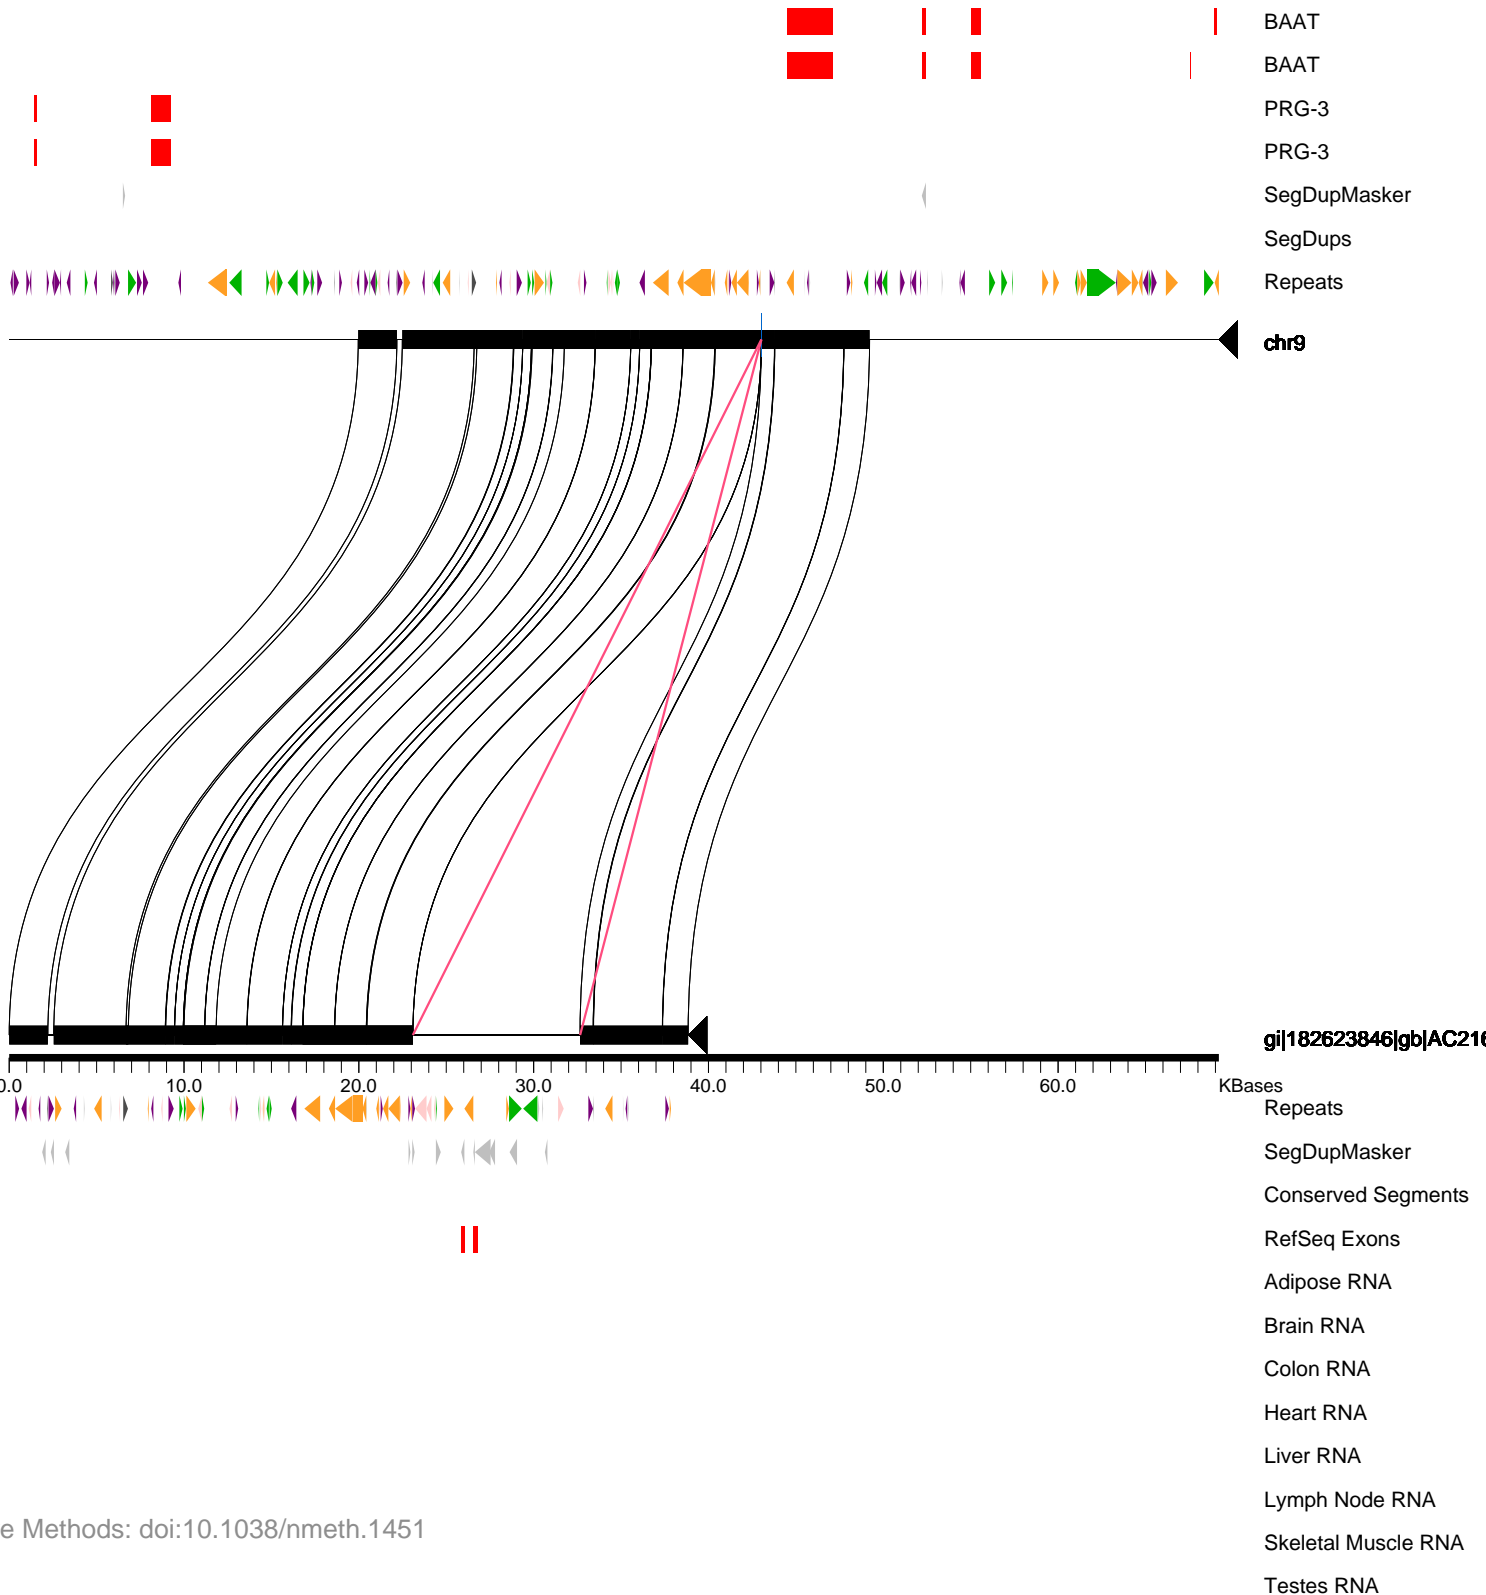

Clone file = AC216120.rc.fa

Insertion Size: 5736

Other Simple Repeat Low Complexity DNA LTR LINE SINE

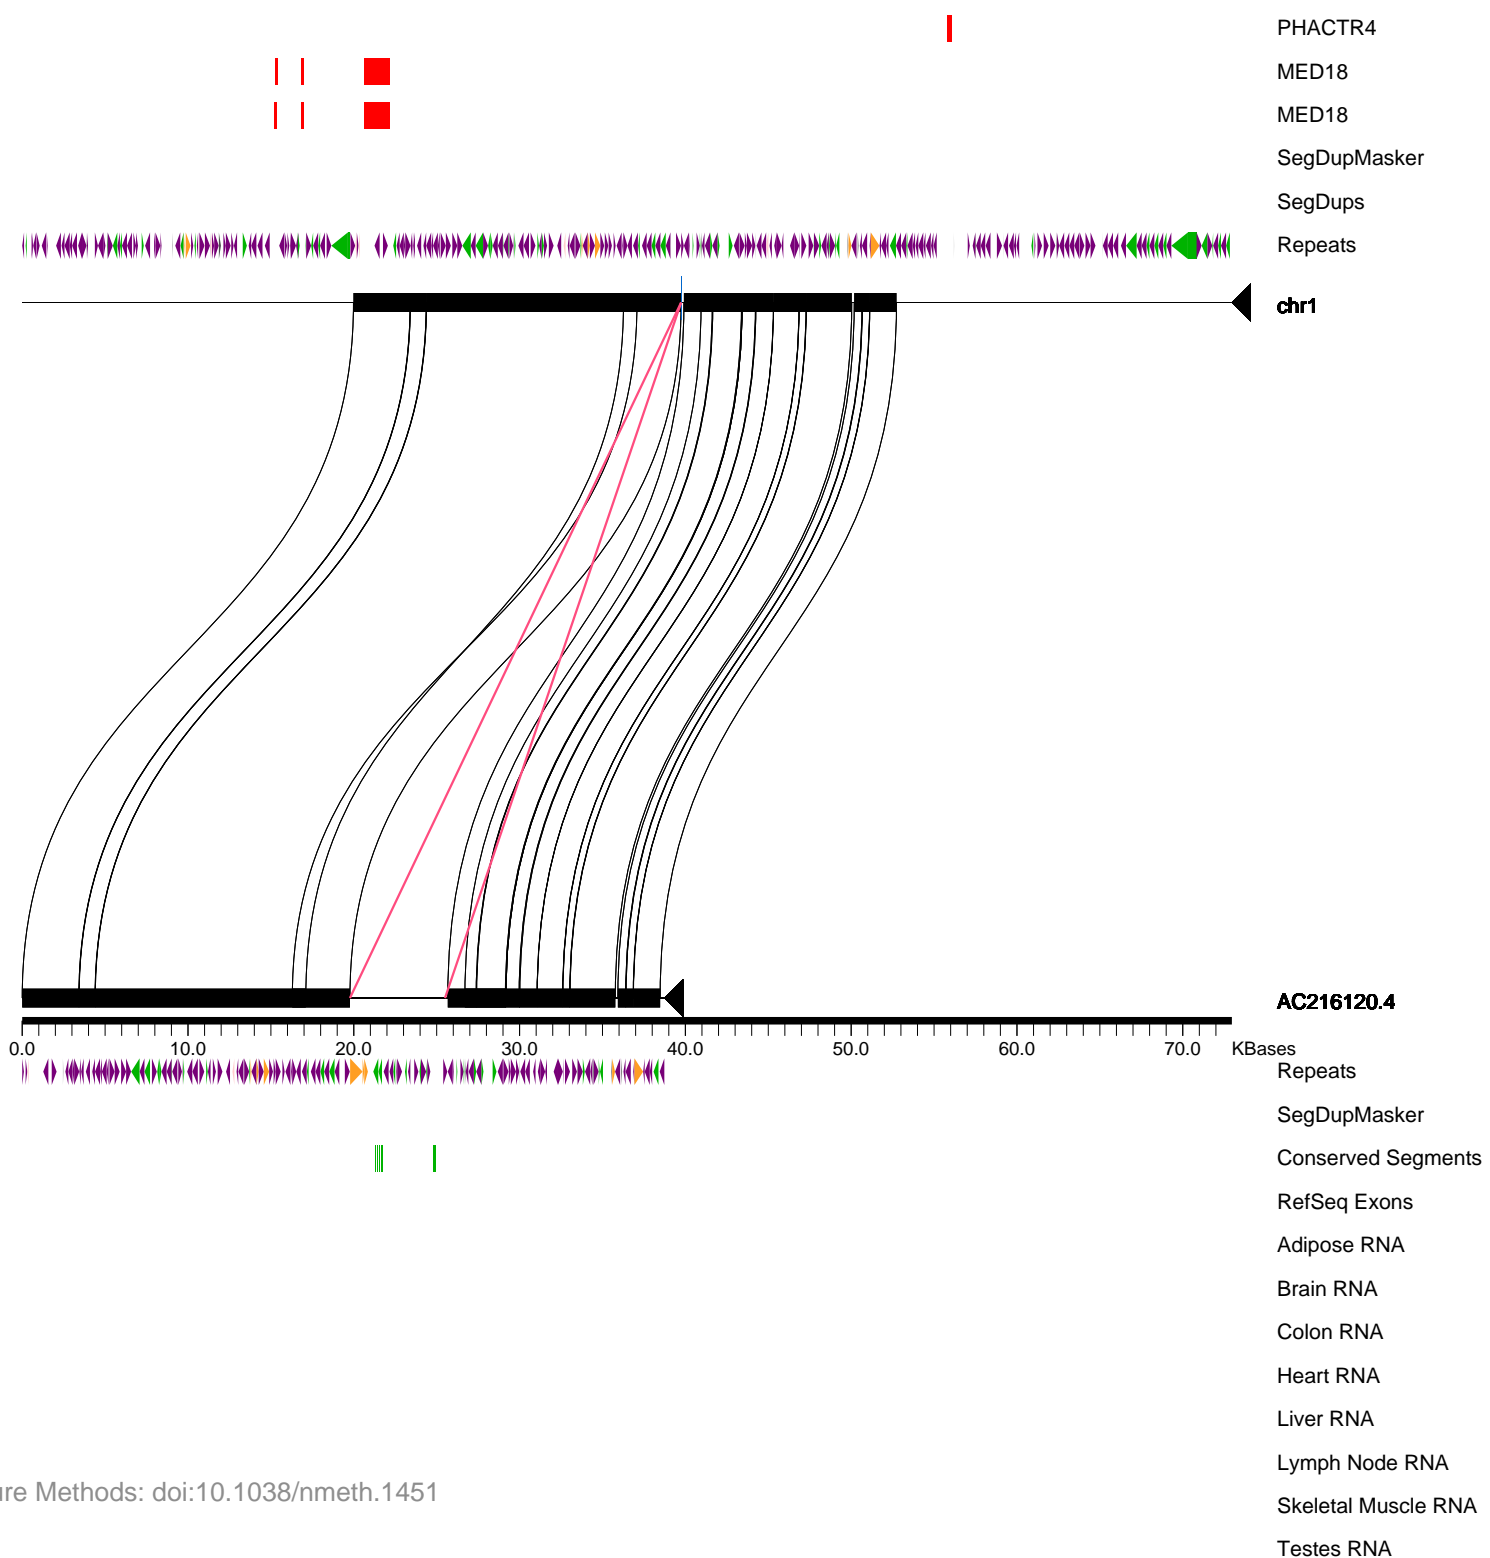

Clone file = AC216138.fa

Insertion Size: 6583

Other Simple Repeat Low Complexity DNA LTR LINE SINE

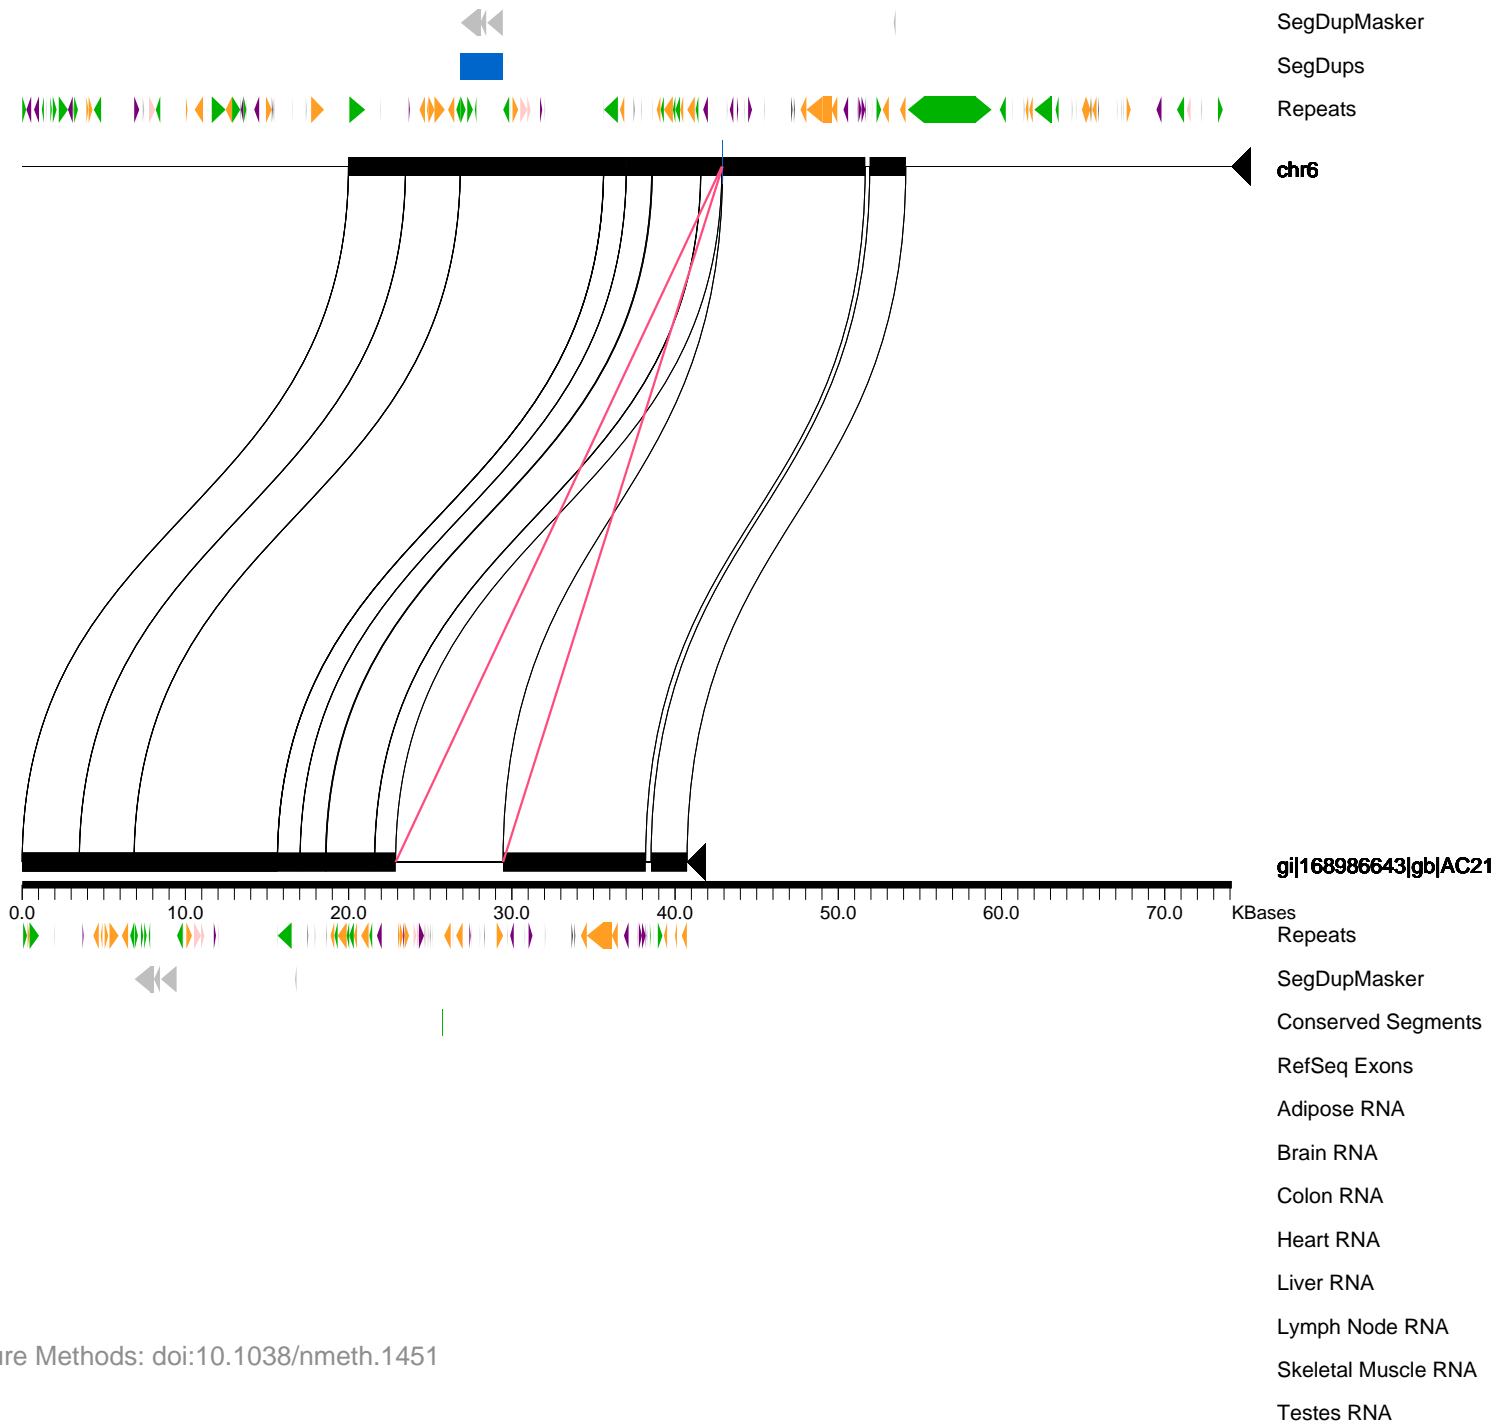

Clone file = AC216281.fa

Insertion Size: 2274

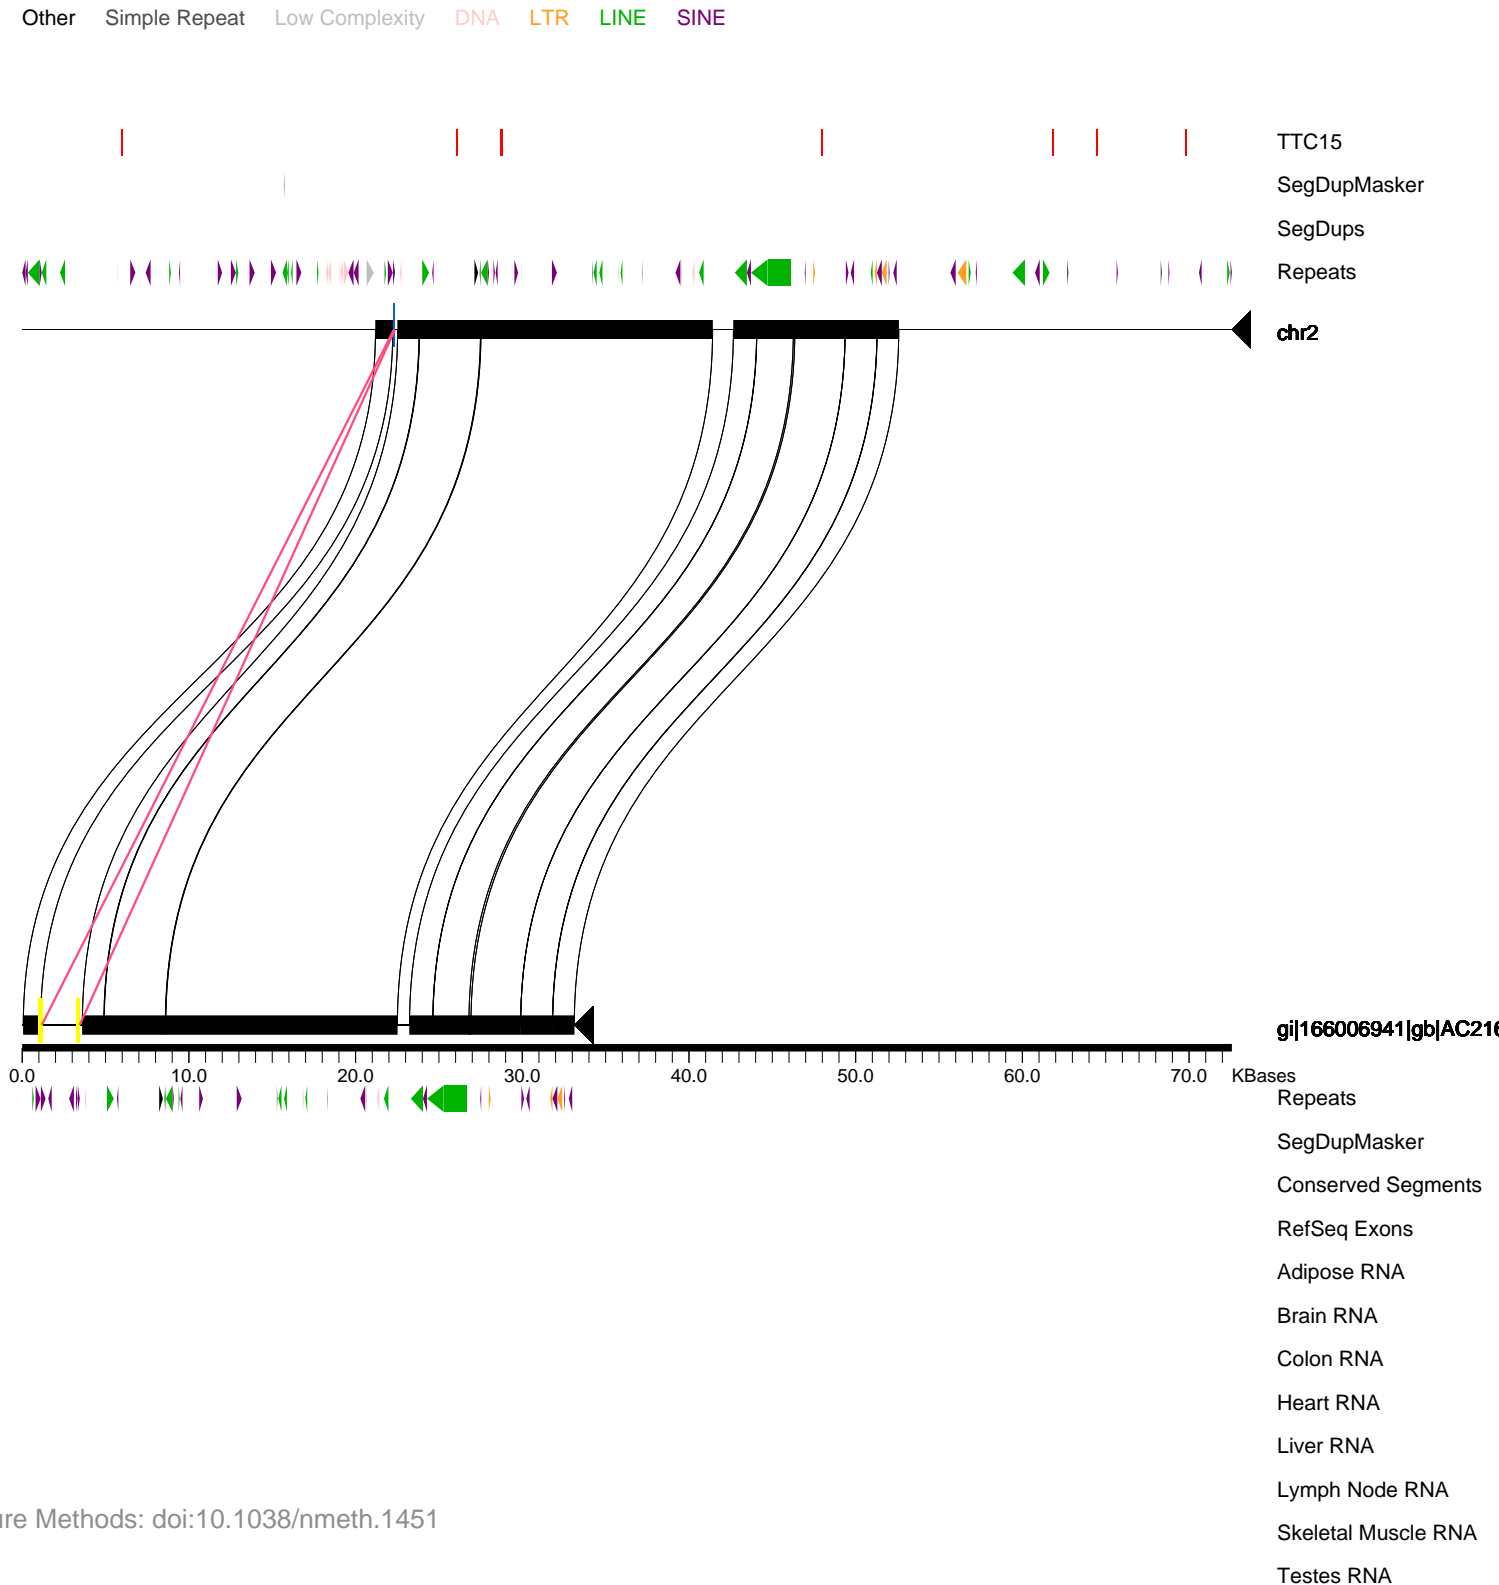

Clone file = AC216823.rc.fa

Insertion Size: 12675

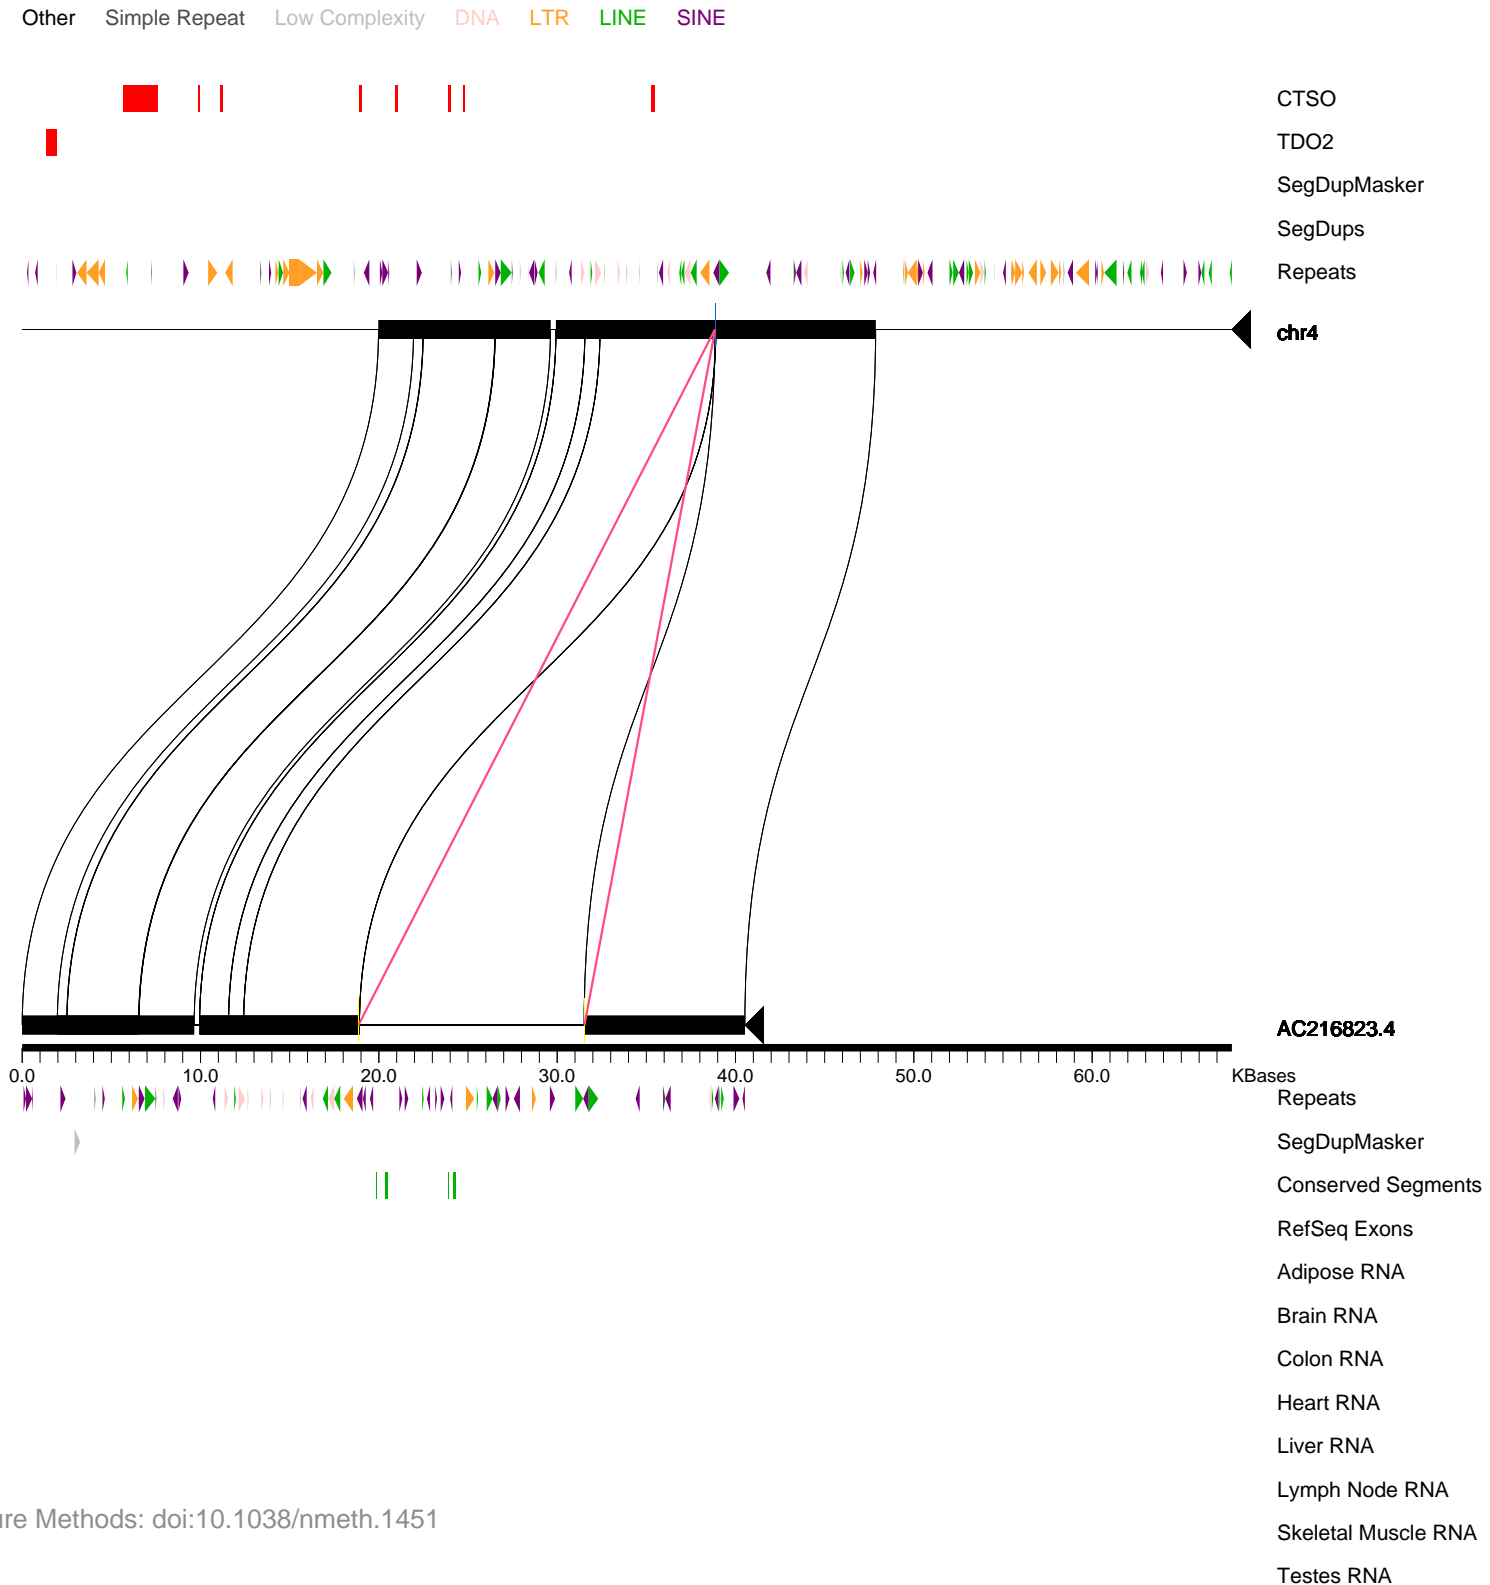



Clone file = AC216971.fa

Insertion Size: 12976

Other Simple Repeat Low Complexity DNA LTR LINE SINE

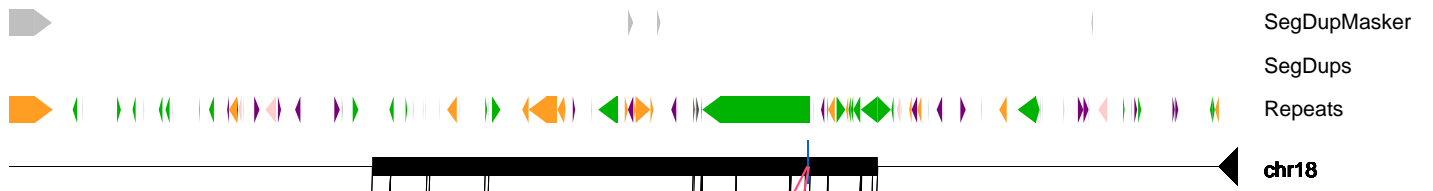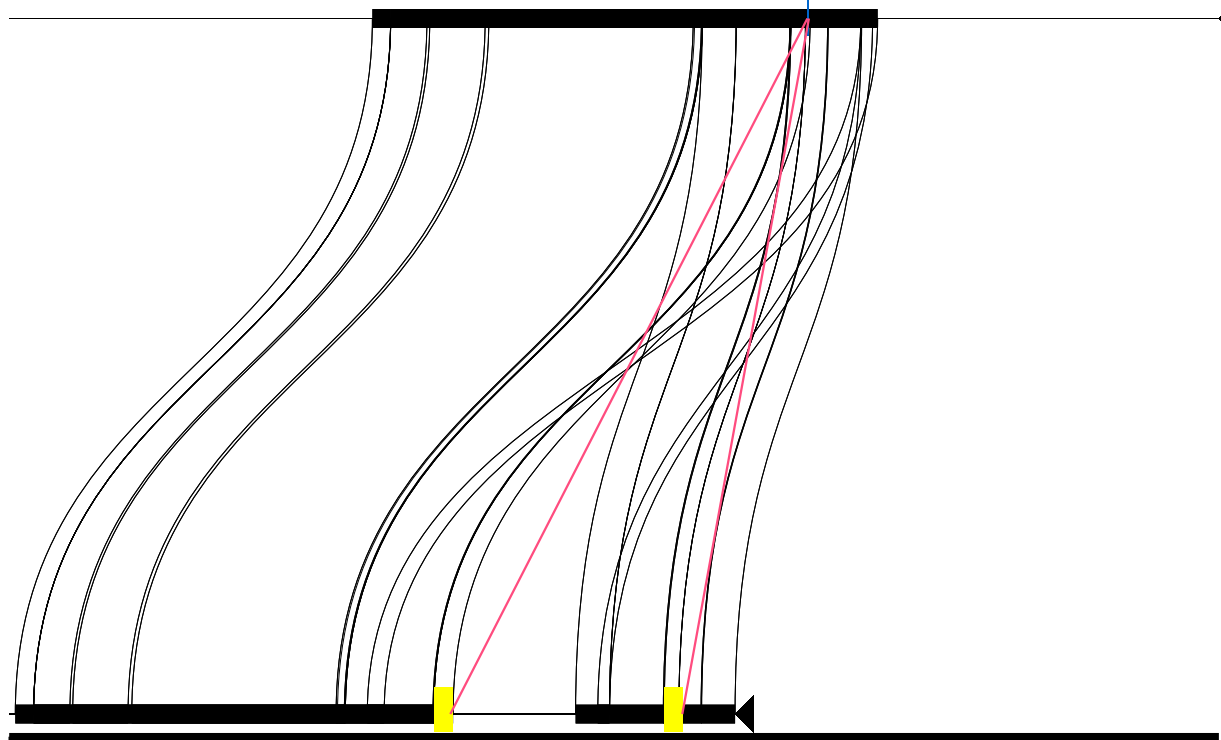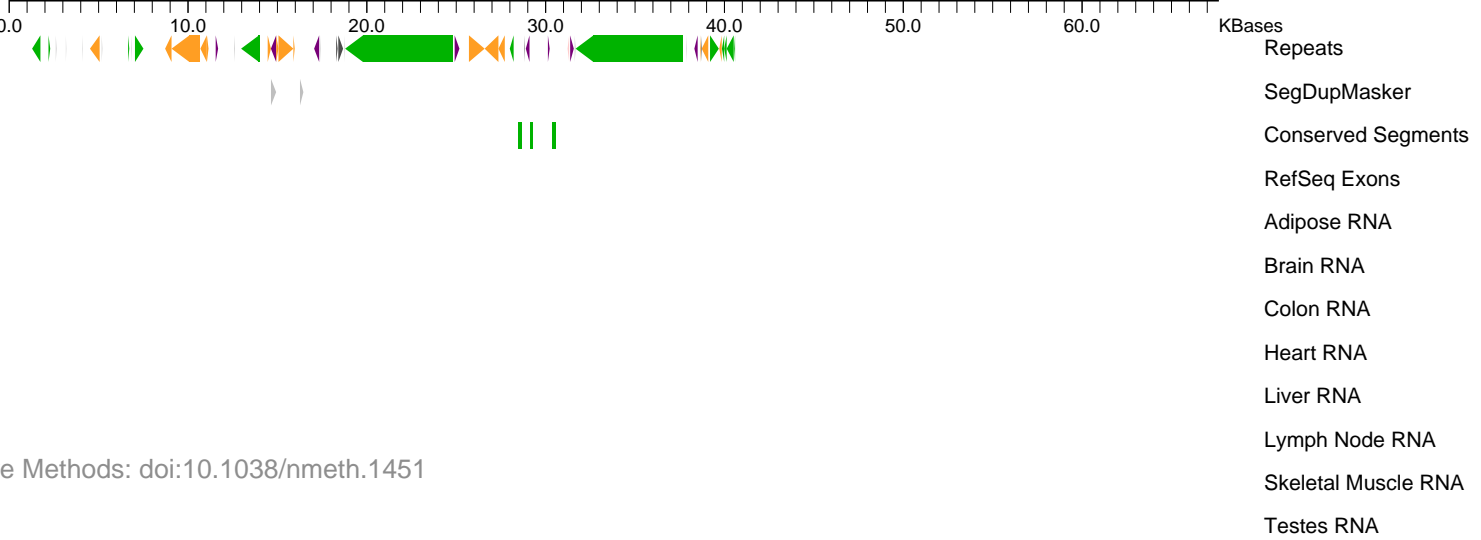

Clone file = AC217009.rc.fa

Insertion Size: 3192

Other Simple Repeat Low Complexity DNA LTR LINE SINE

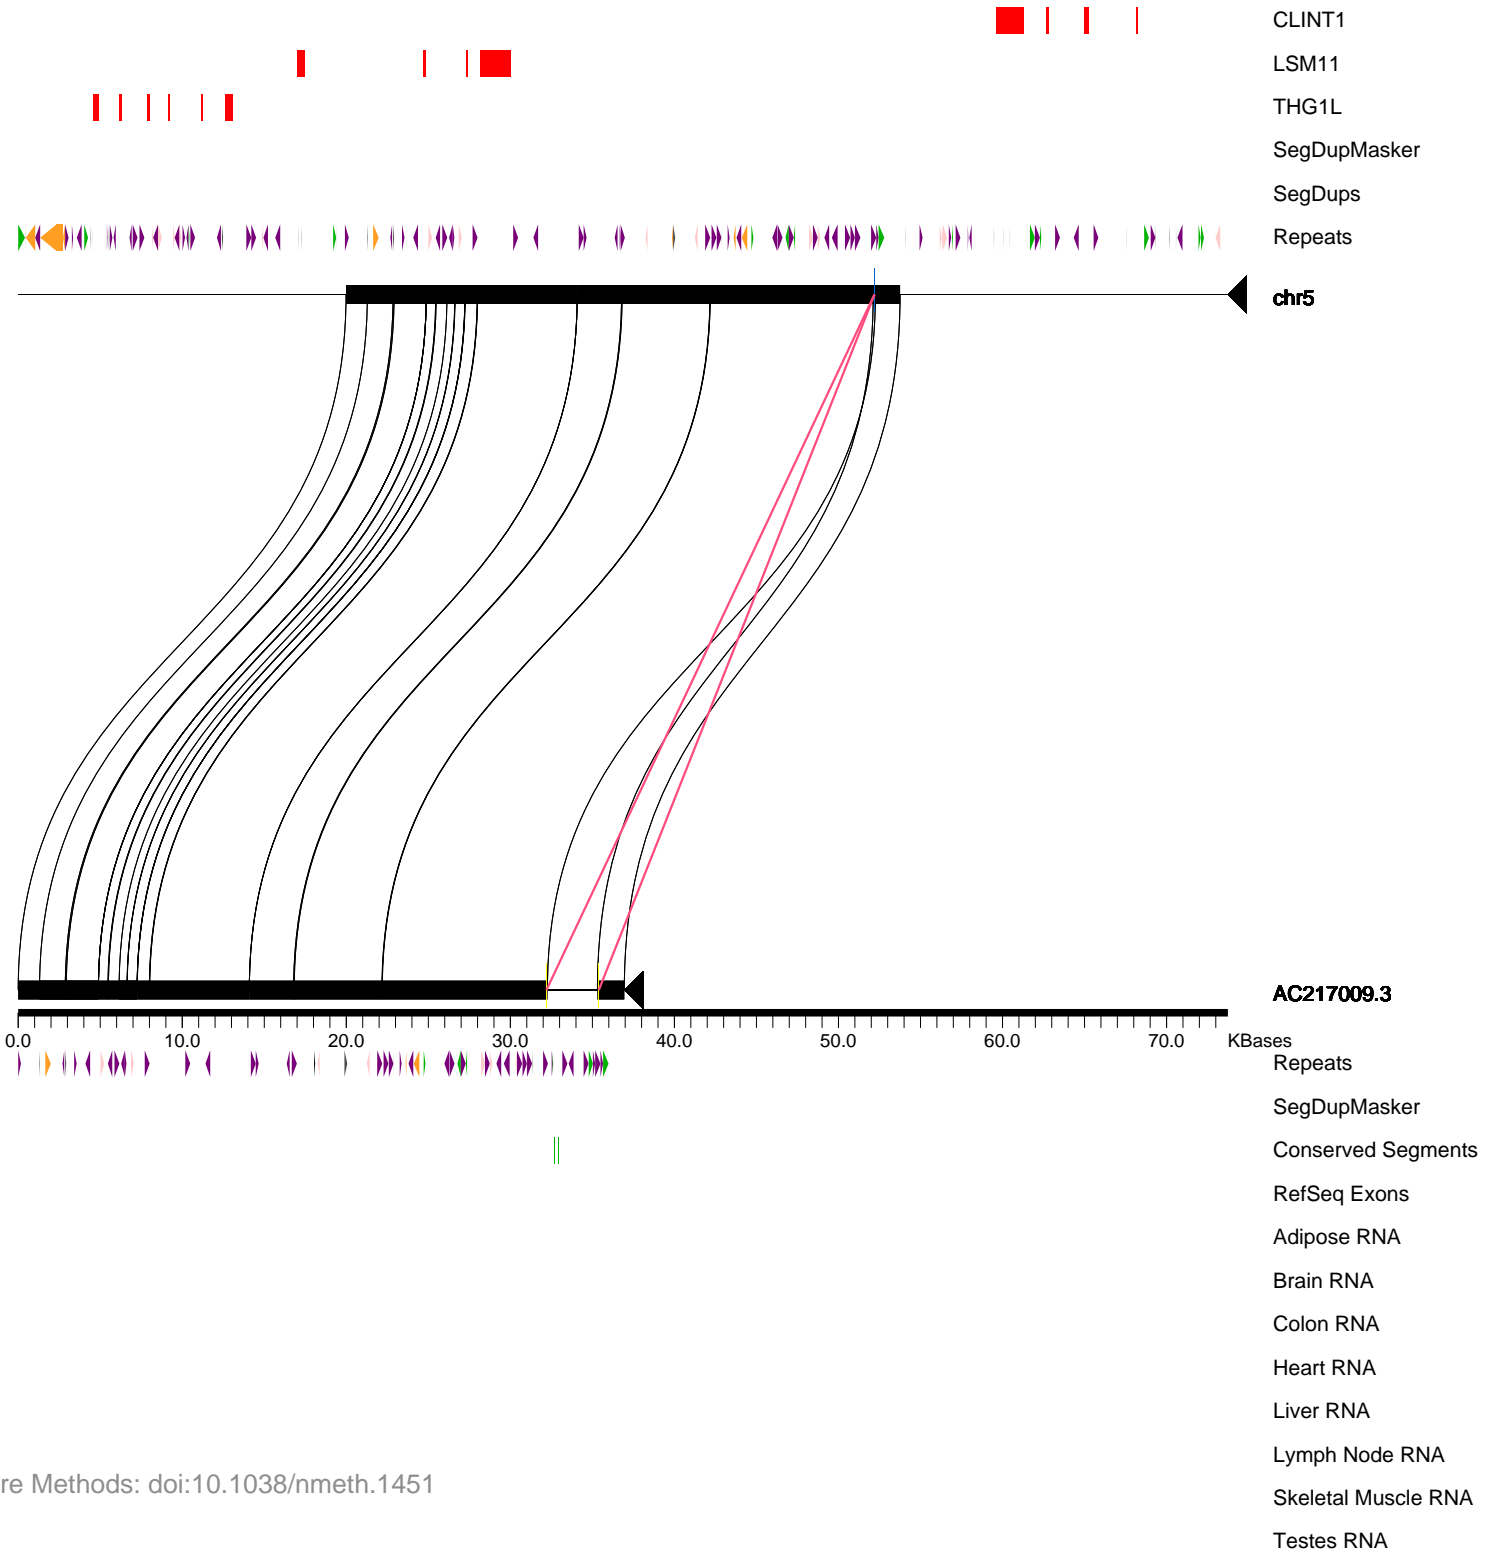

Clone file = AC217012.rc.fa

Insertion Size: 3412

Other Simple Repeat Low Complexity DNA LTR LINE SINE

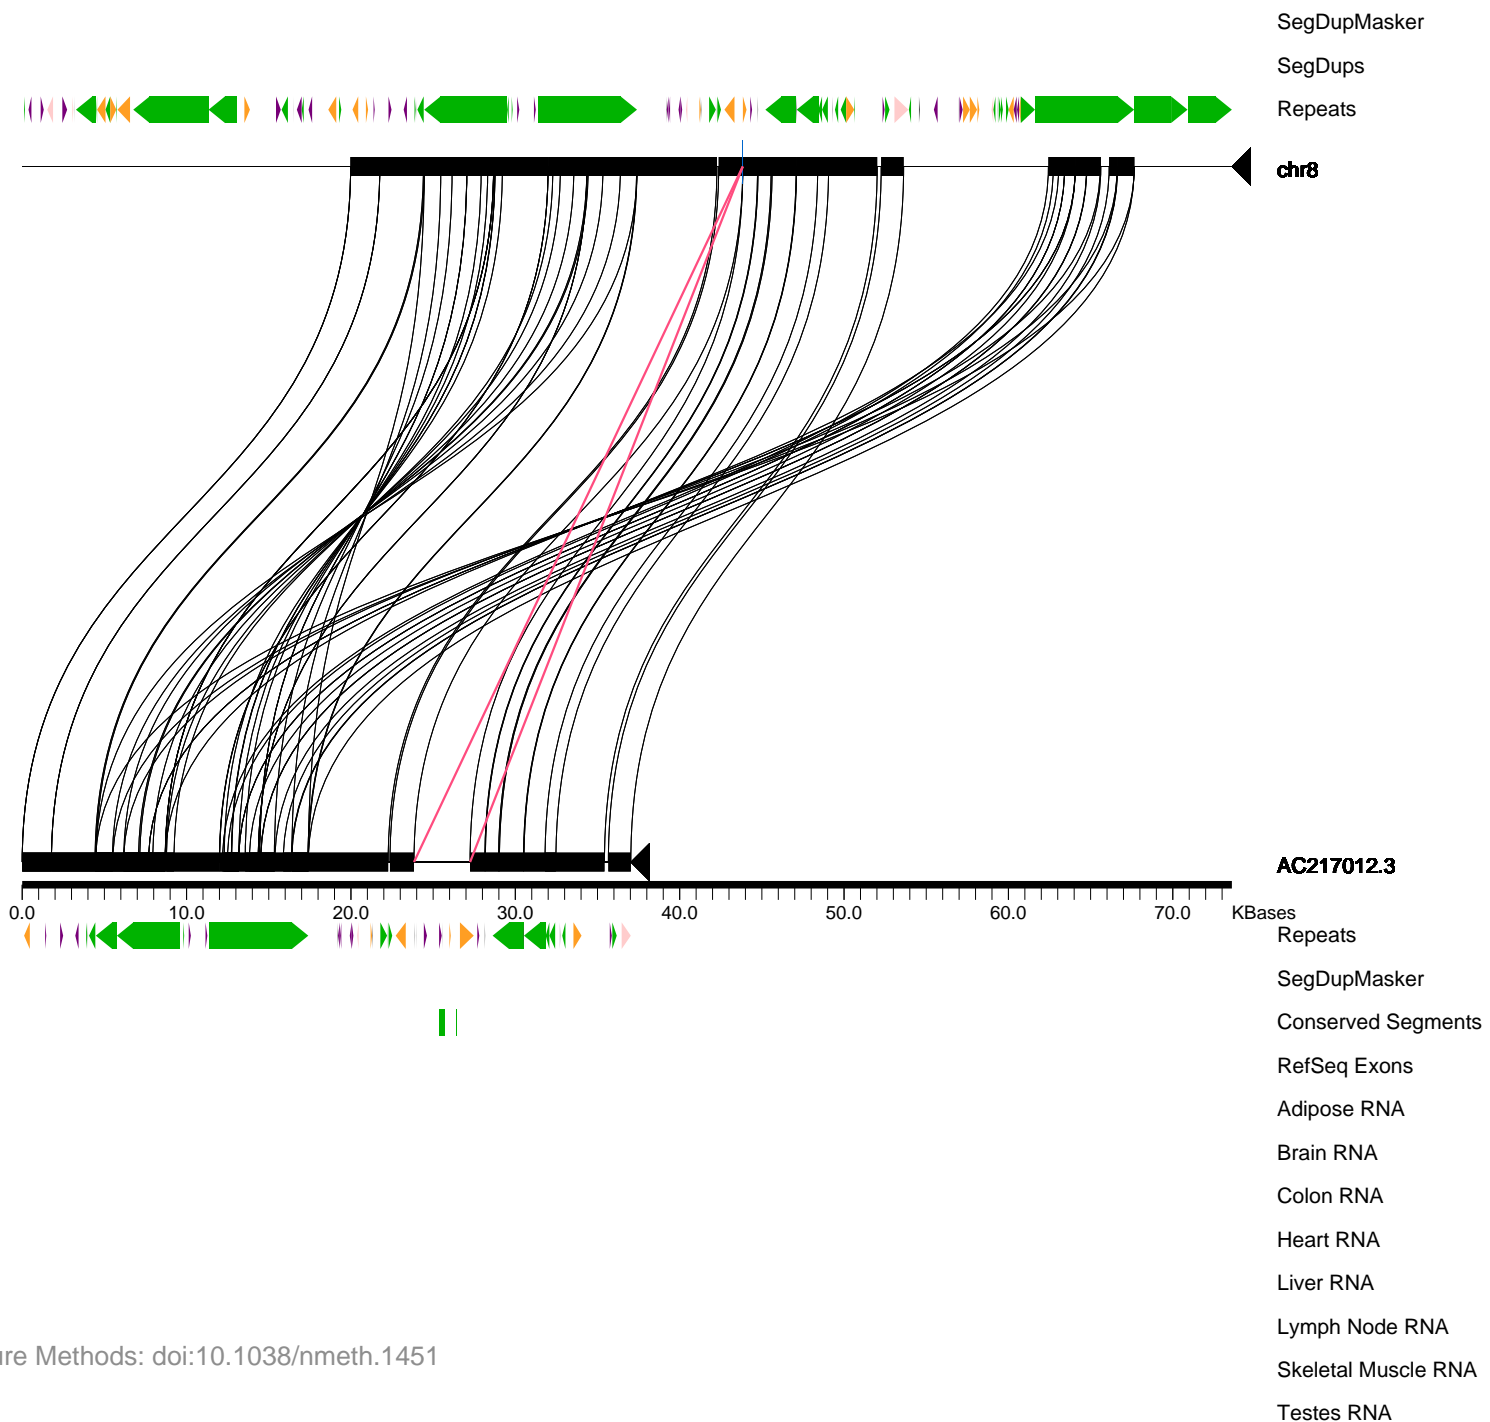

Clone file = AC217018.fa

Insertion Size: 31727

Other Simple Repeat Low Complexity DNA LTR LINE SINE

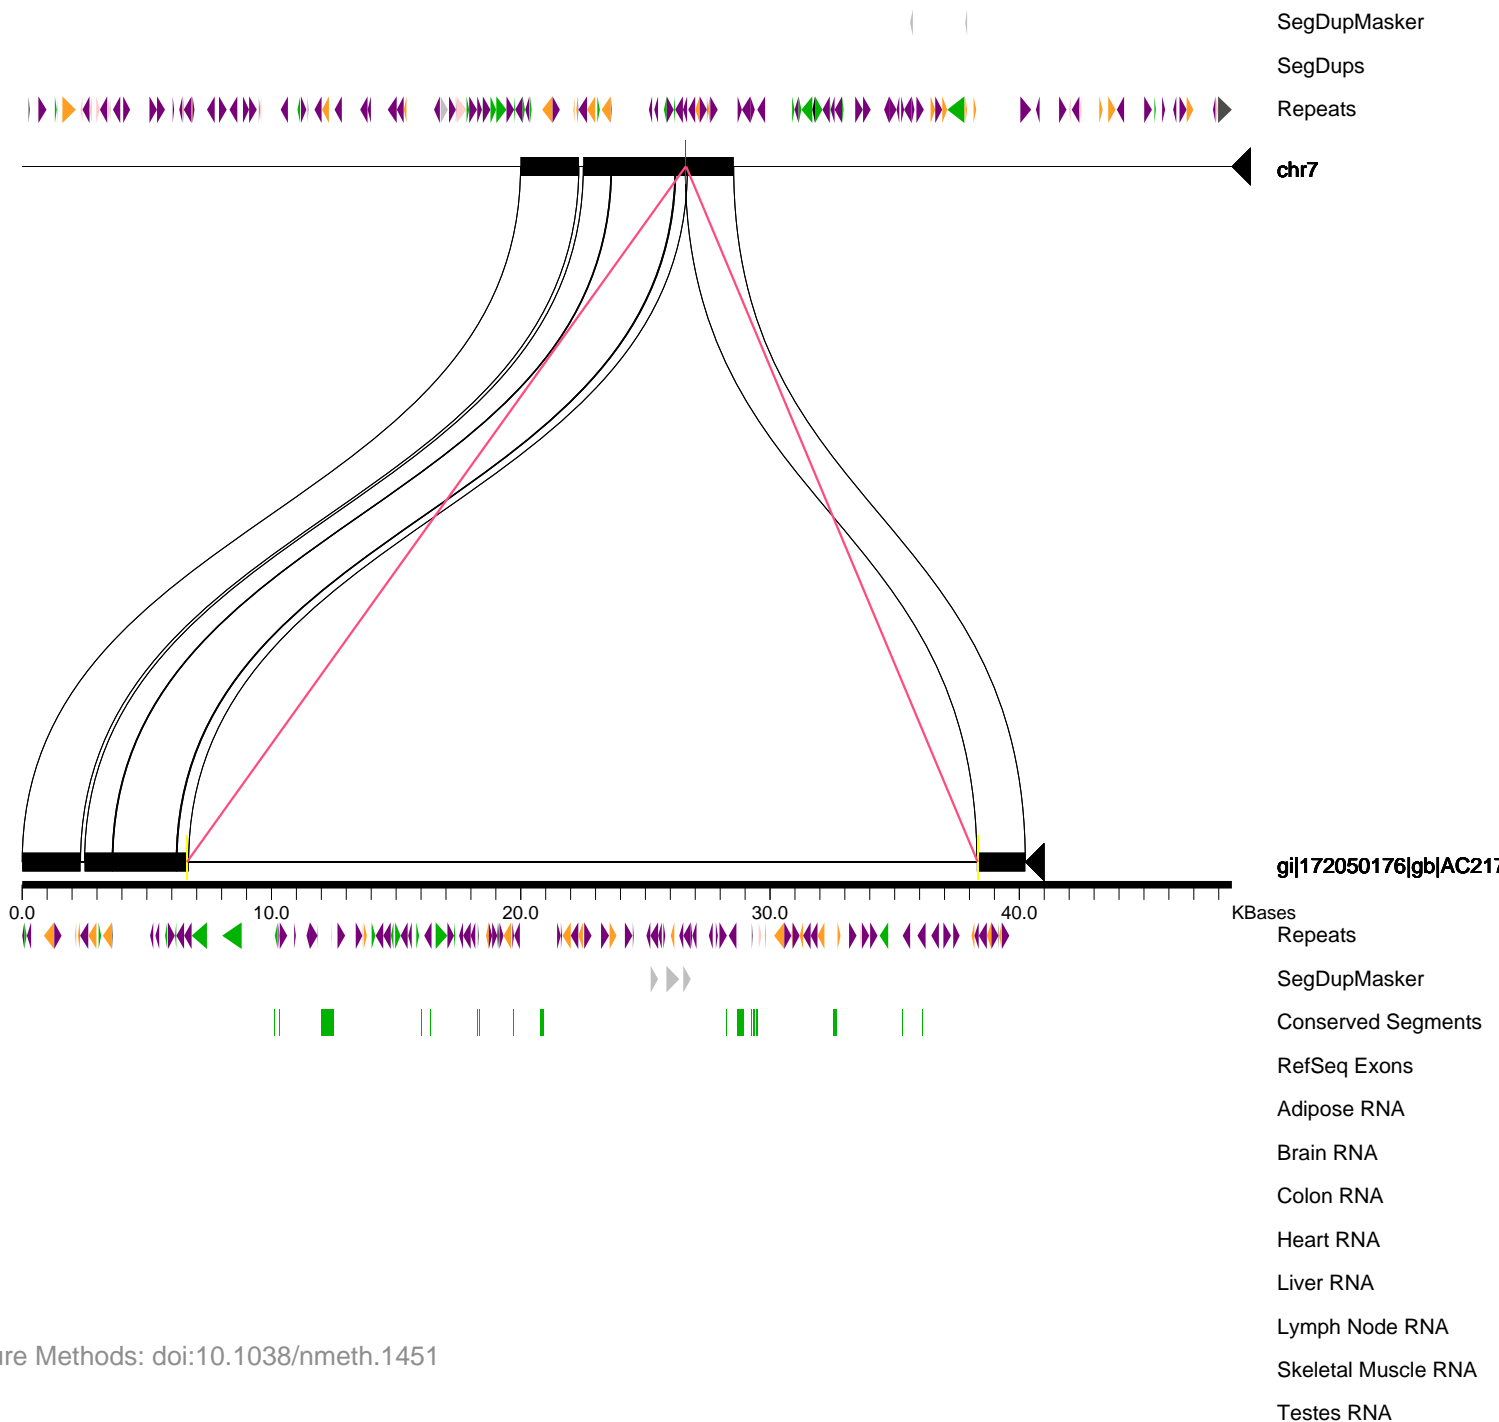

Clone file = AC217064.fa

Insertion Size: 6067

Other Simple Repeat Low Complexity DNA LTR LINE SINE

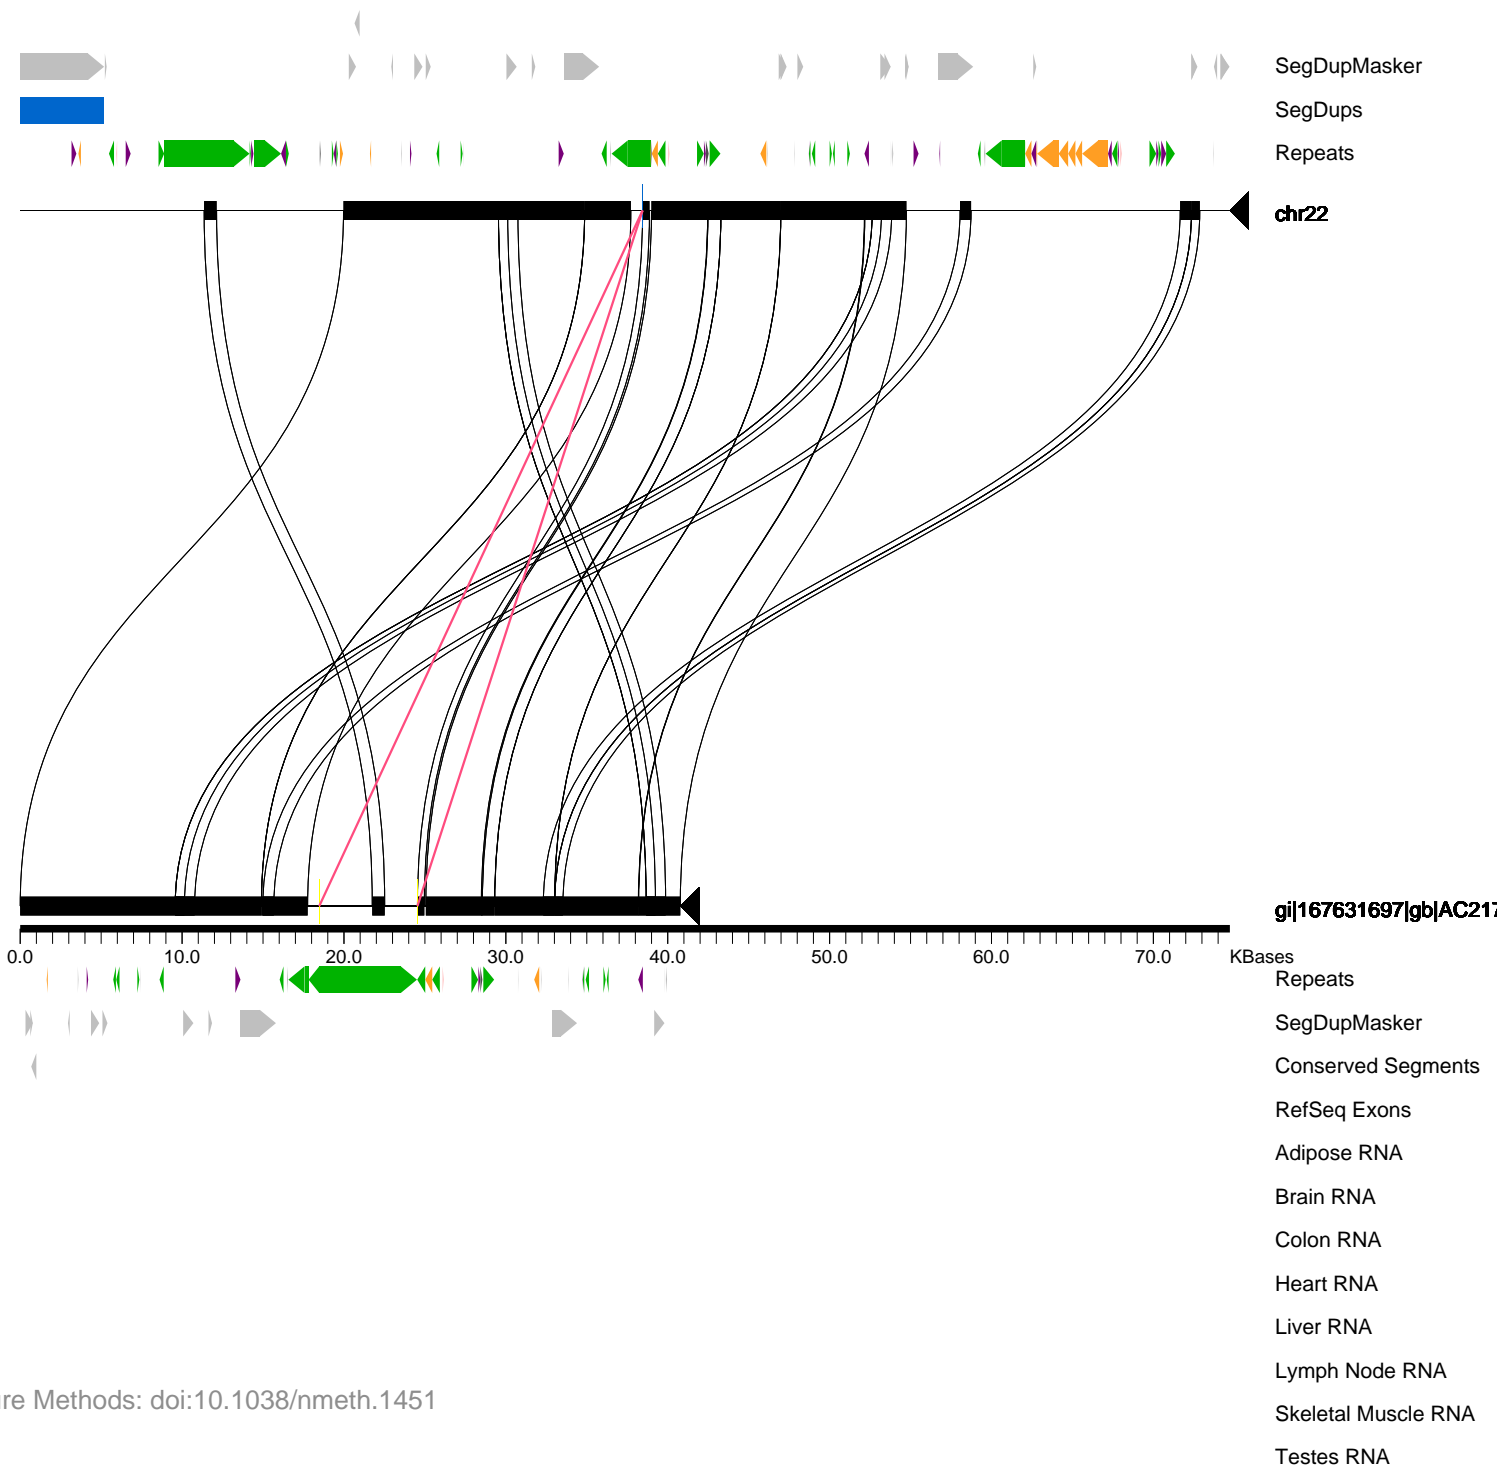

Clone file = AC217140.fa

Insertion Size: 1370

Other Simple Repeat Low Complexity DNA LTR LINE SINE

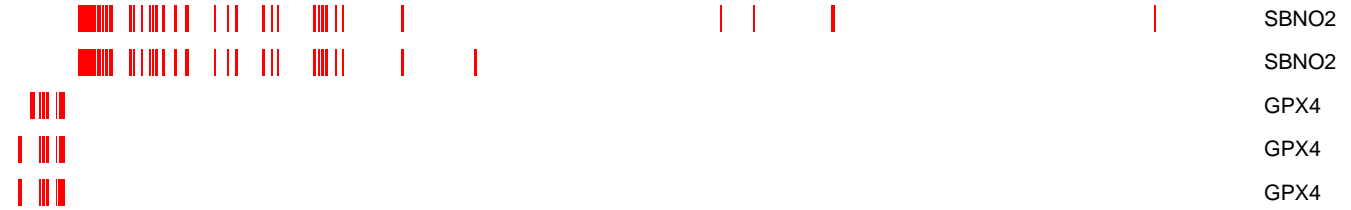

SegDupMasker

SegDups

Repeats

chr19

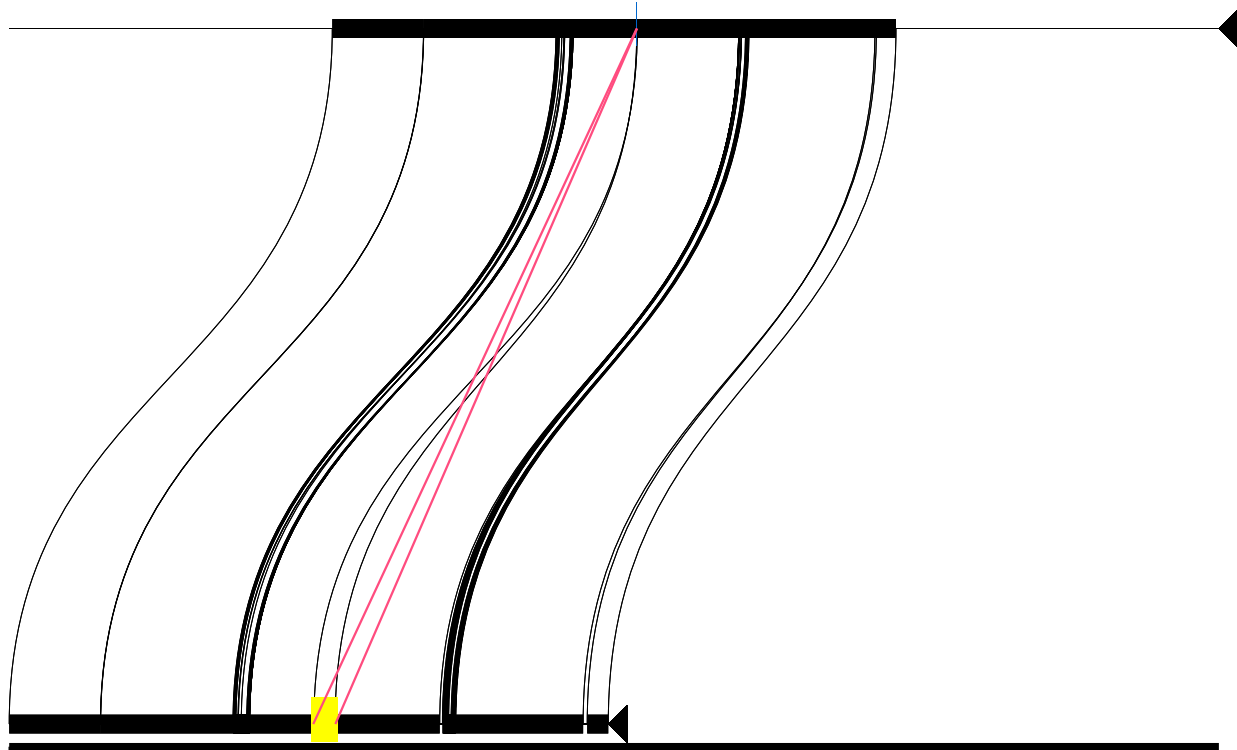

gi|210147661|gb|AC217

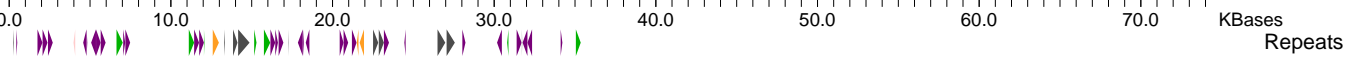

Conserved Segments

RefSeq Exons

Adipose RNA

Brain RNA

Colon RNA

Heart RNA

Liver RNA

Lymph Node RNA

Skeletal Muscle RNA

Testes RNA

Clone file = AC217326.fa

Insertion Size: 5083

Other Simple Repeat Low Complexity DNA LTR LINE SINE

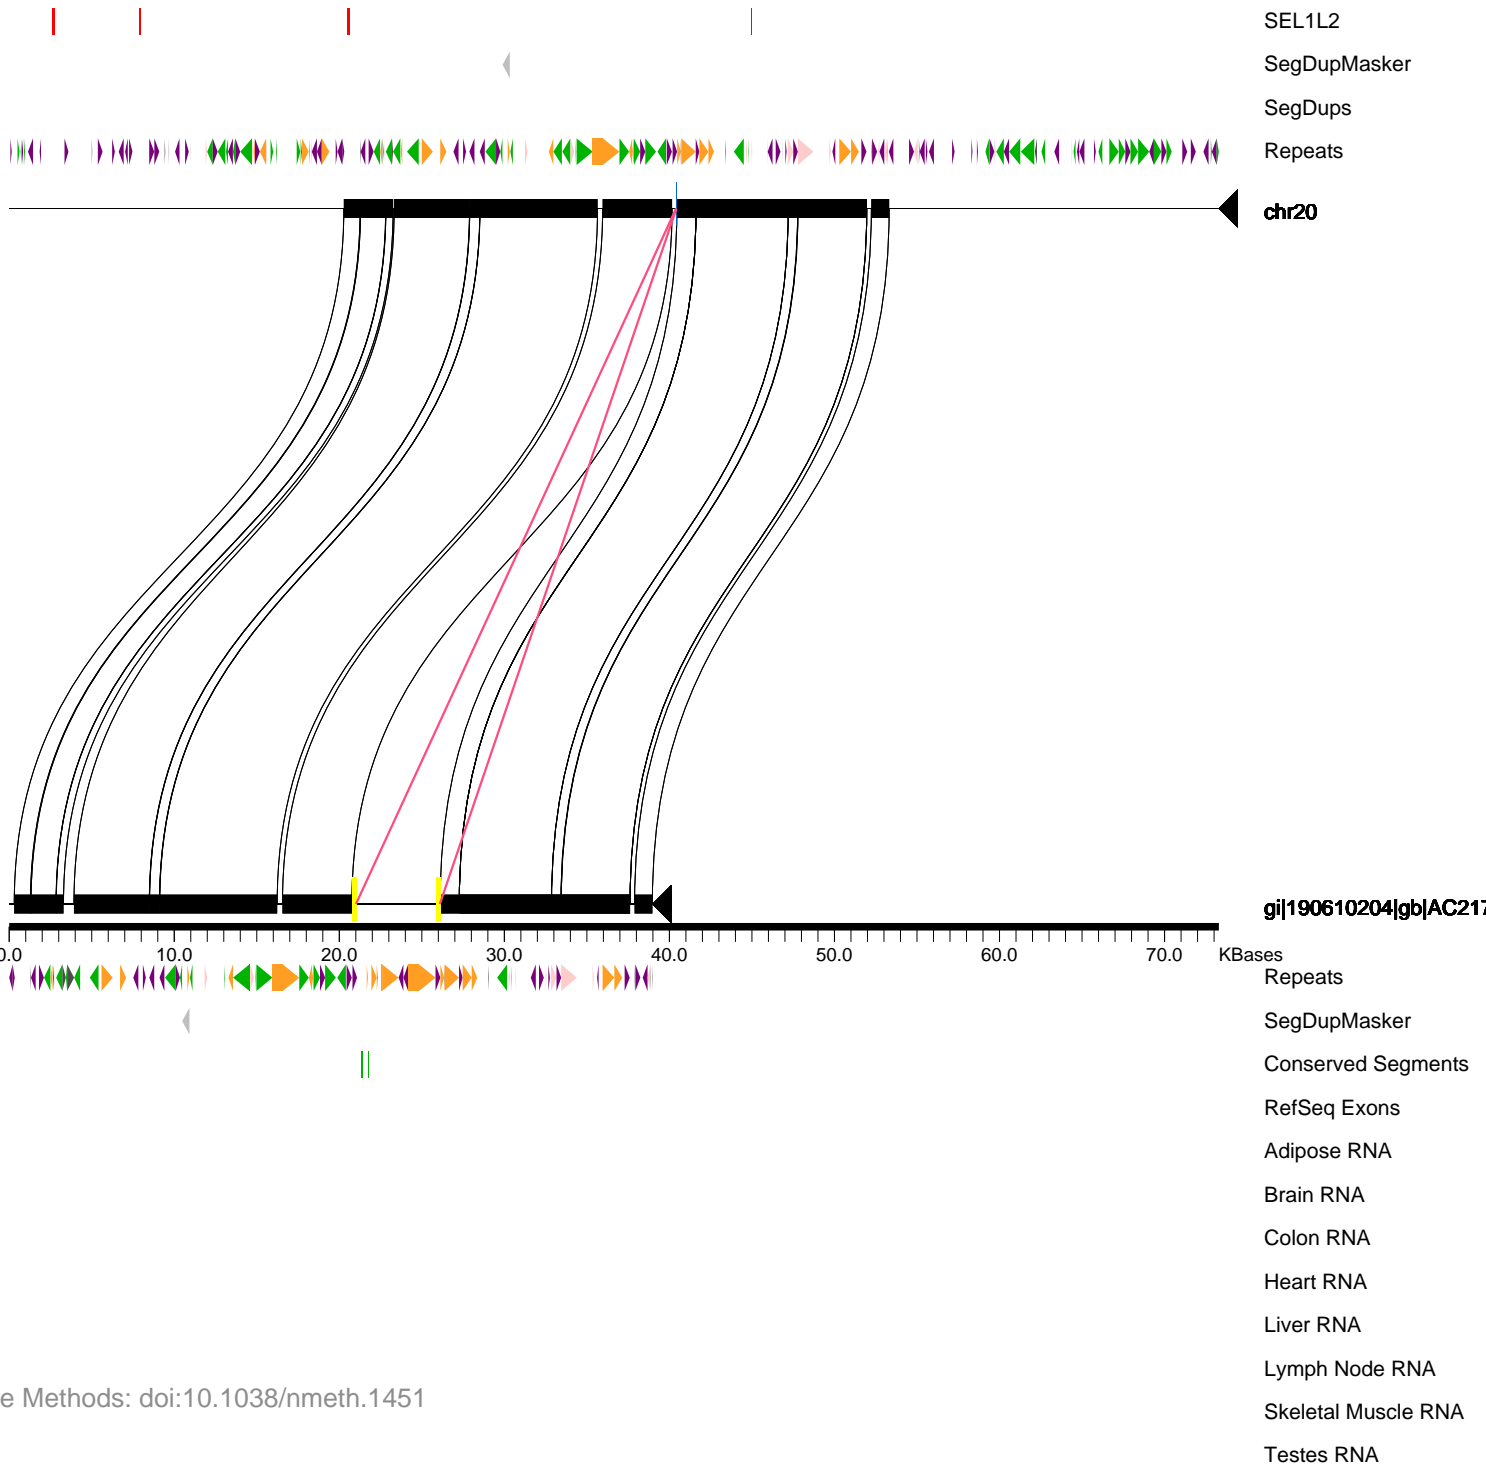

Clone file = AC217414.rc.fa

Insertion Size: 3348

Other Simple Repeat Low Complexity DNA LTR LINE SINE

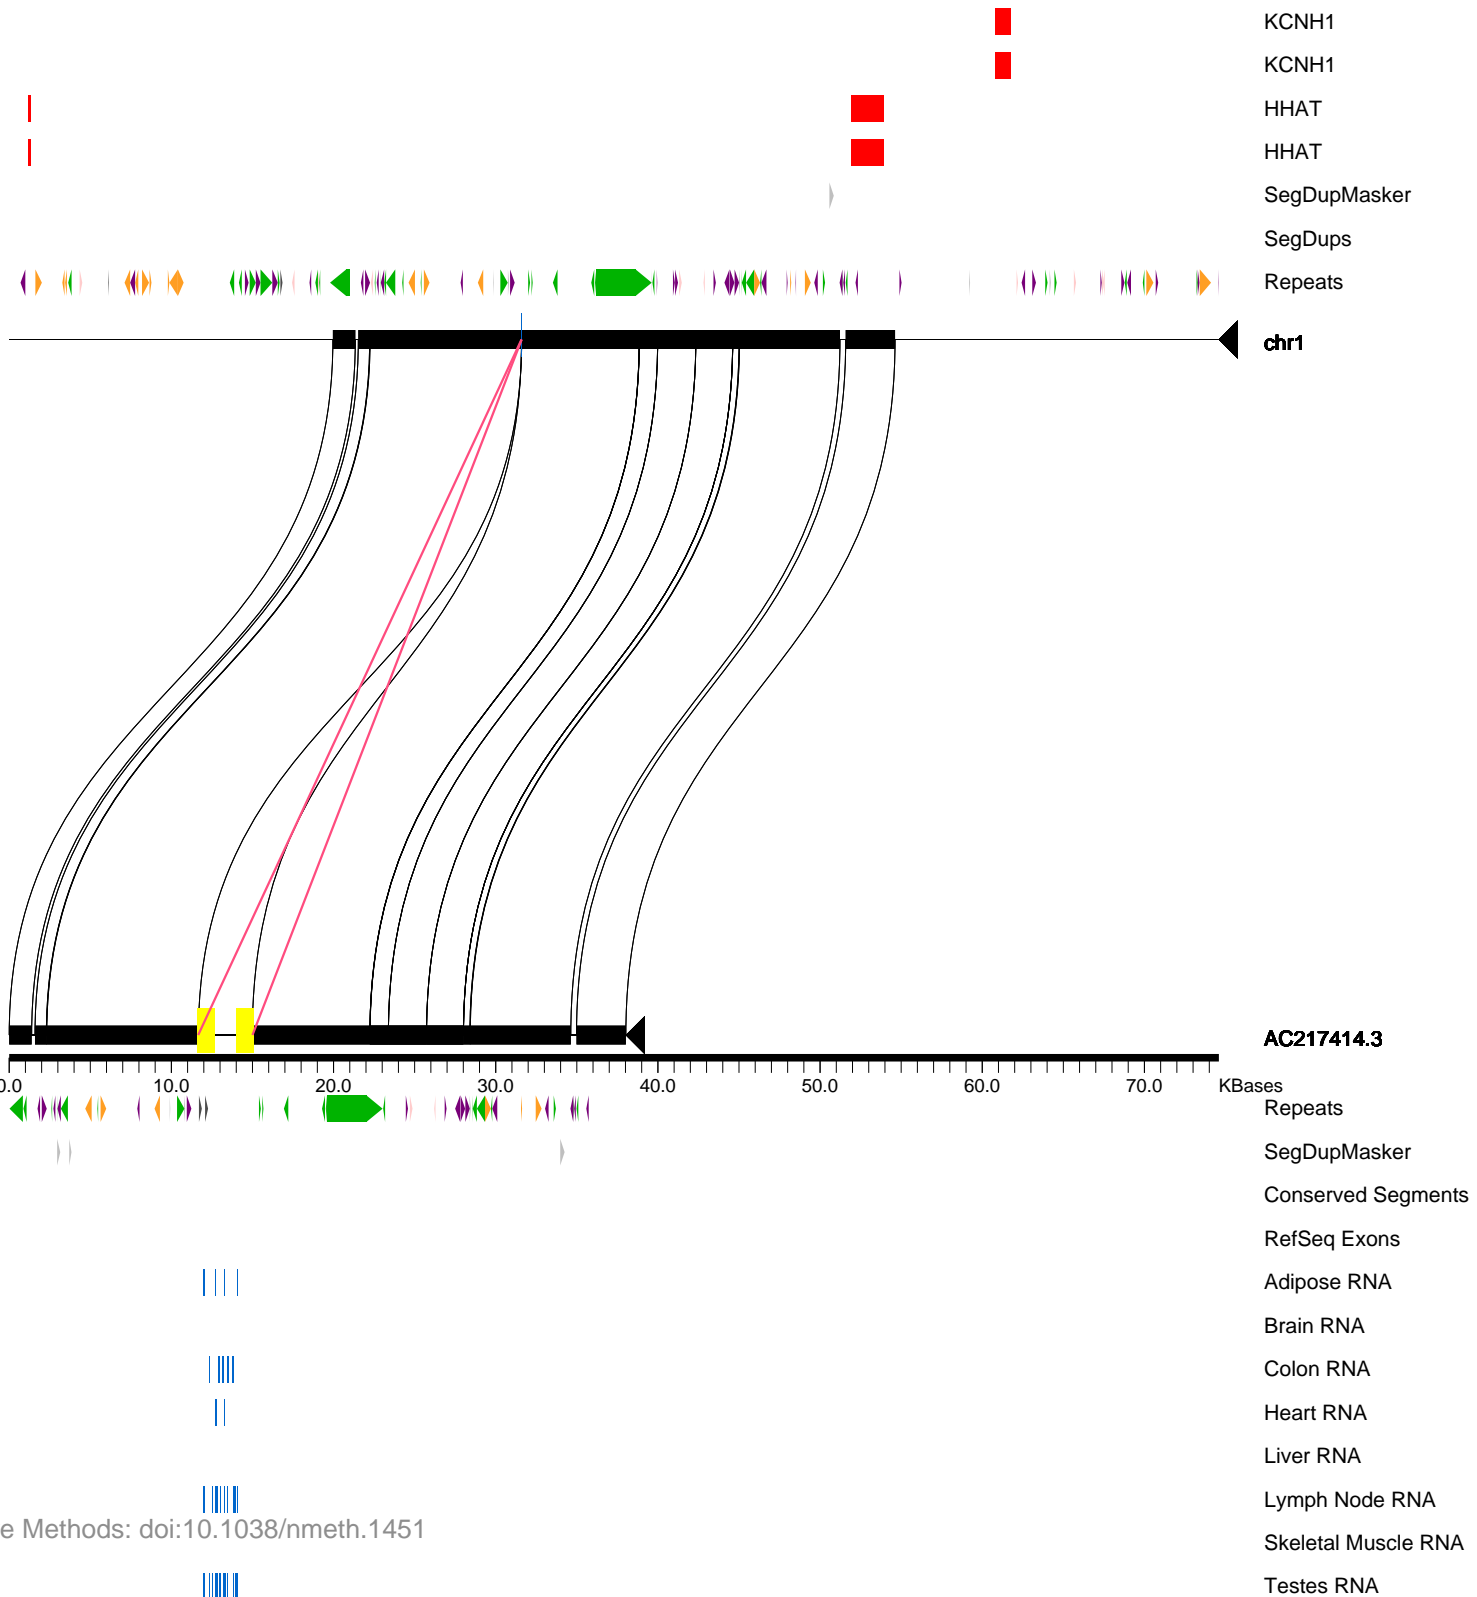



Clone file = AC217515.rc.fa

Insertion Size: 839

Other Simple Repeat Low Complexity DNA LTR LINE SINE

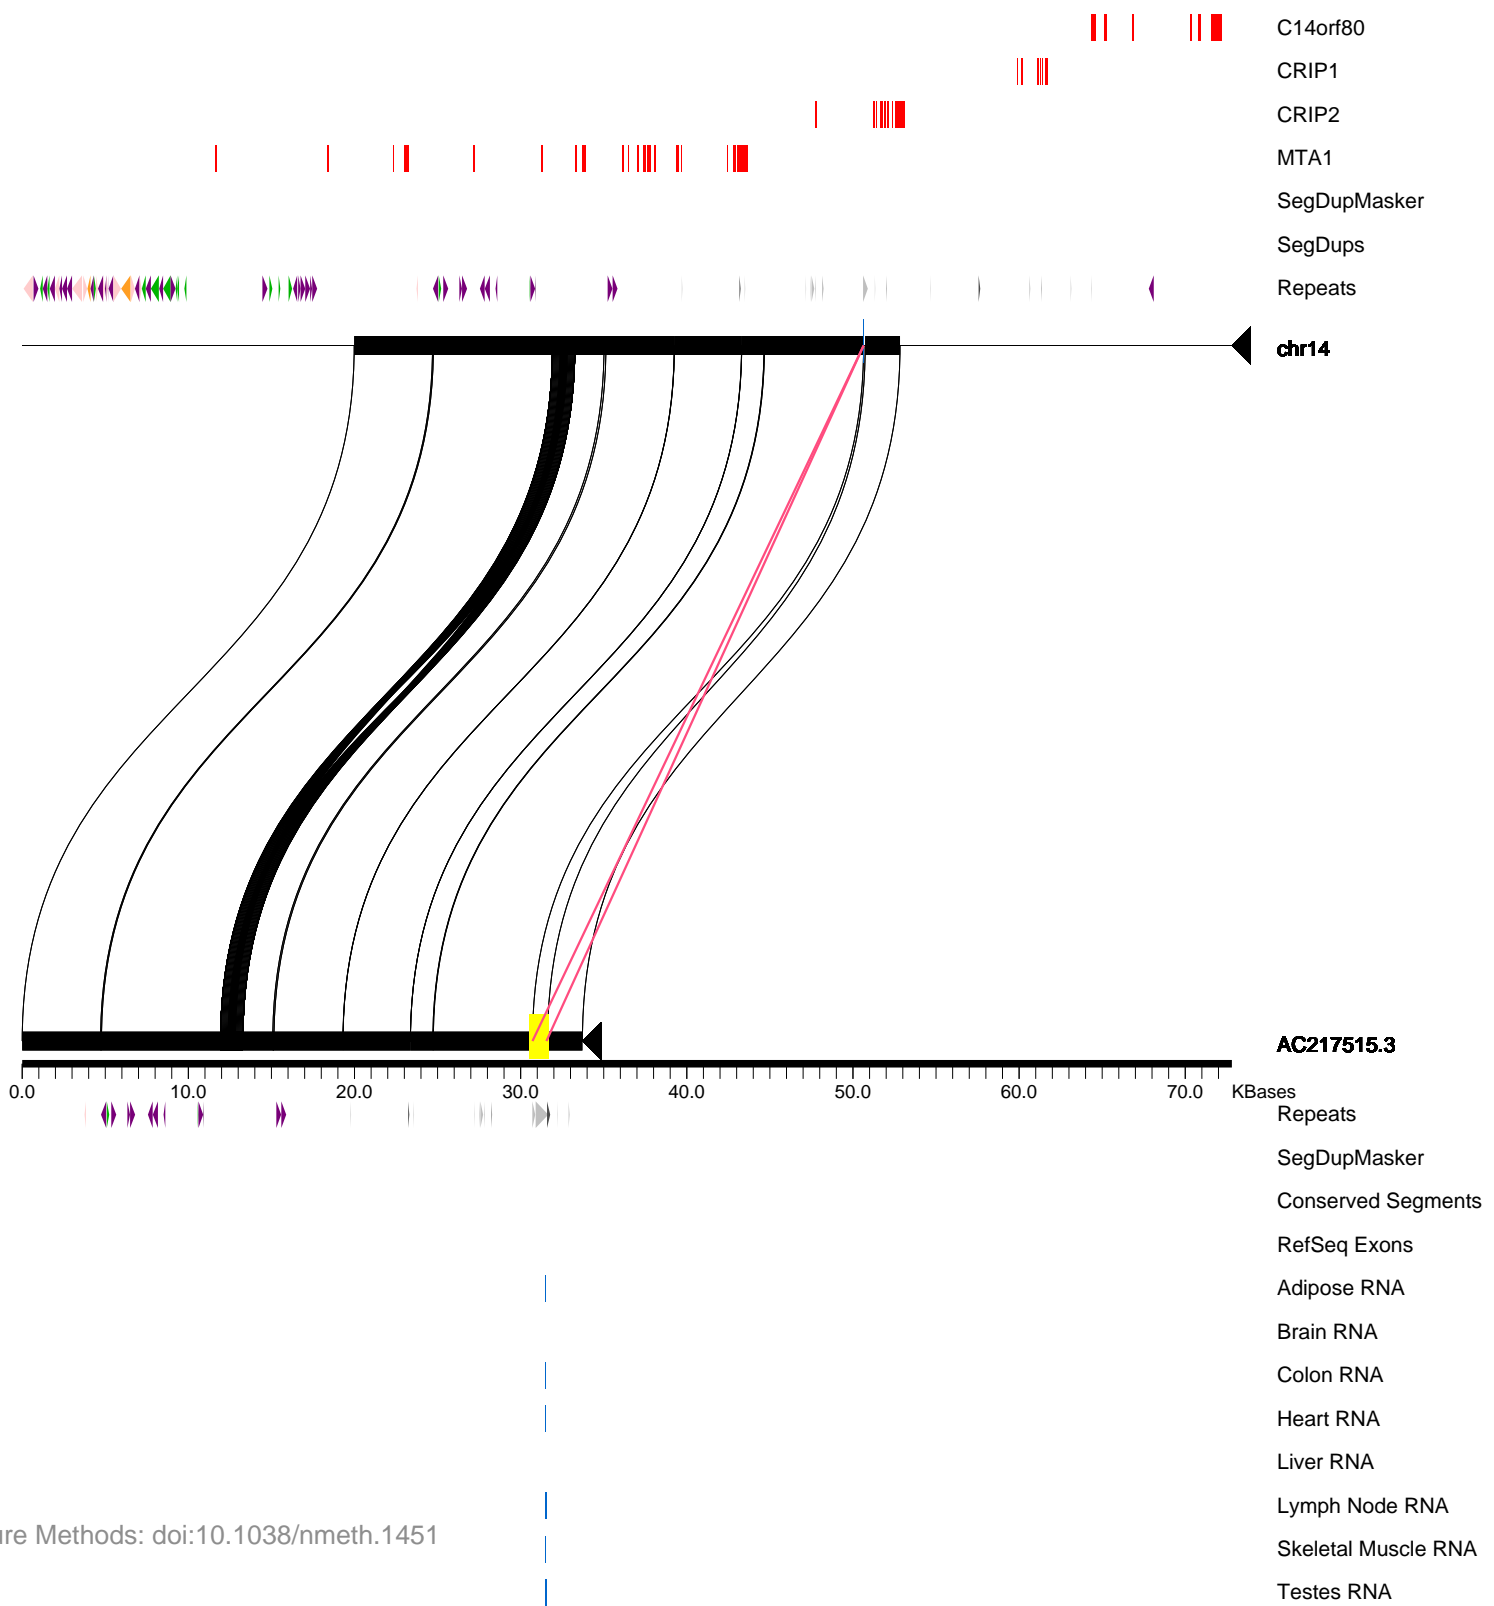

Clone file = AC217628.fa

Insertion Size: 5948

Other Simple Repeat Low Complexity DNA LTR LINE SINE

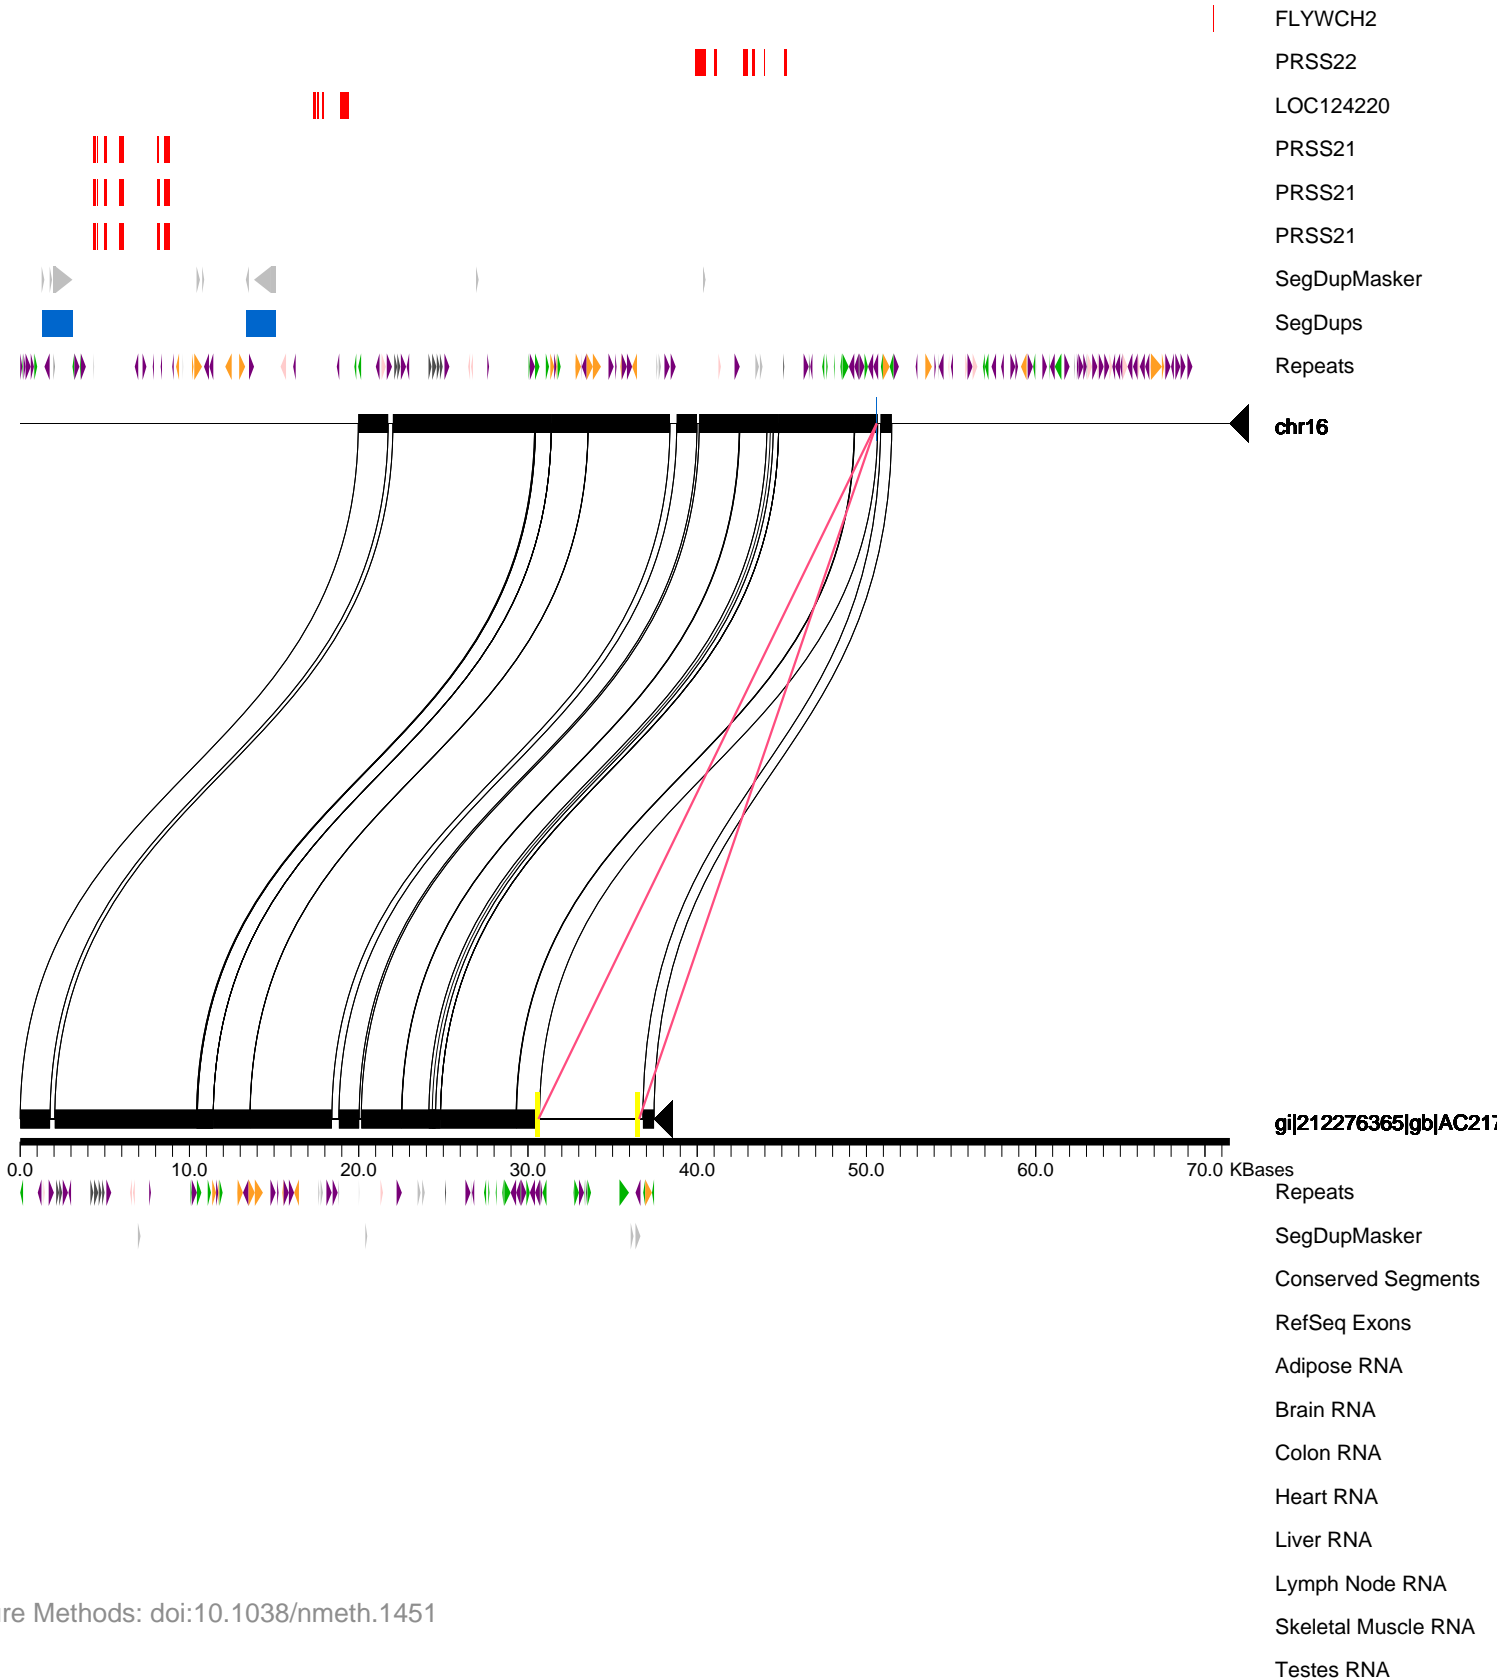

Clone file = AC217954.rc.fa

Insertion Size: 30820

Other Simple Repeat Low Complexity DNA LTR LINE SINE

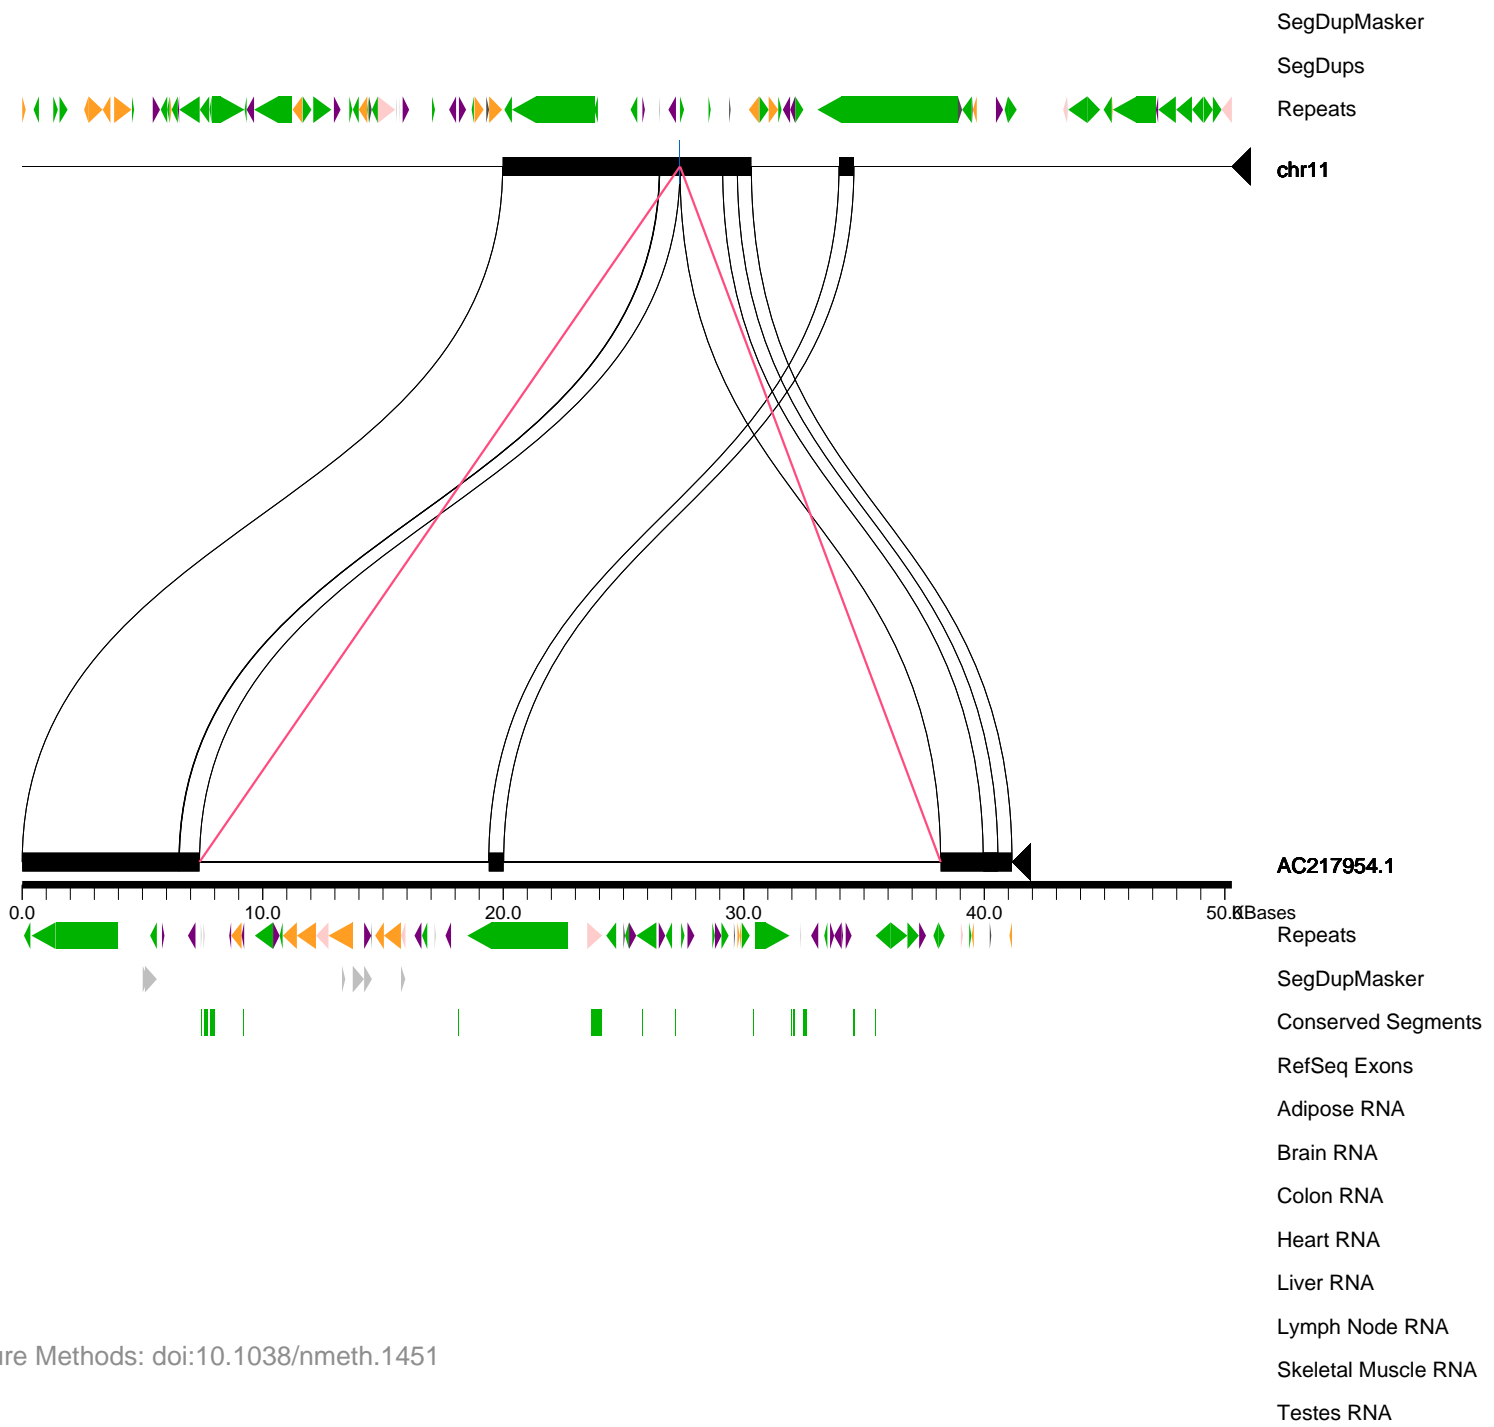

Clone file = AC220966.fa

Insertion Size: 4243

Other Simple Repeat Low Complexity DNA LTR LINE SINE

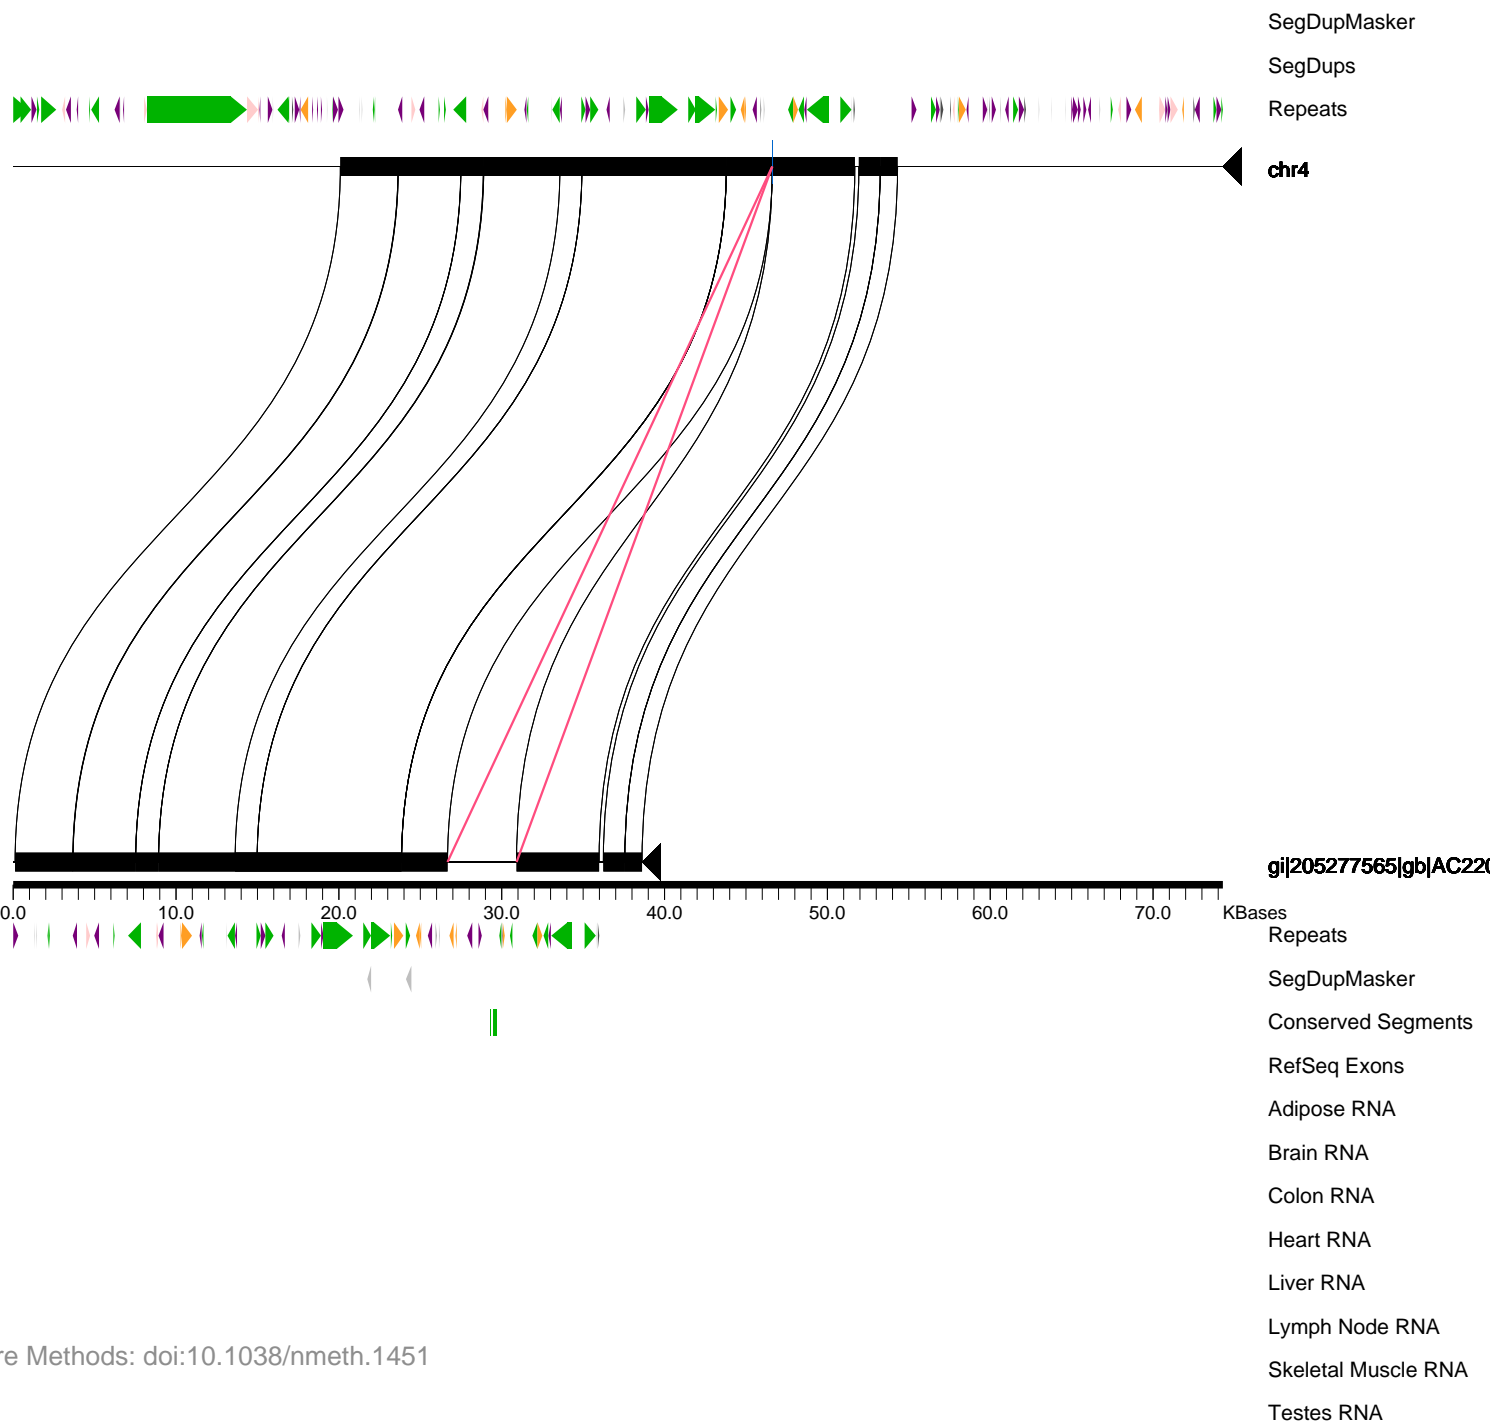

Clone file = AC221035.rc.fa

Insertion Size: 5699

Other Simple Repeat Low Complexity DNA LTR LINE SINE

SegDupMasker

SegDups

Repeats

chr18

AC221035.3

Repeats

SegDupMasker

Conserved Segments

RefSeq Exons

Adipose RNA

Brain RNA

Colon RNA

Heart RNA

Liver RNA

Lymph Node RNA

Skeletal Muscle RNA

Testes RNA

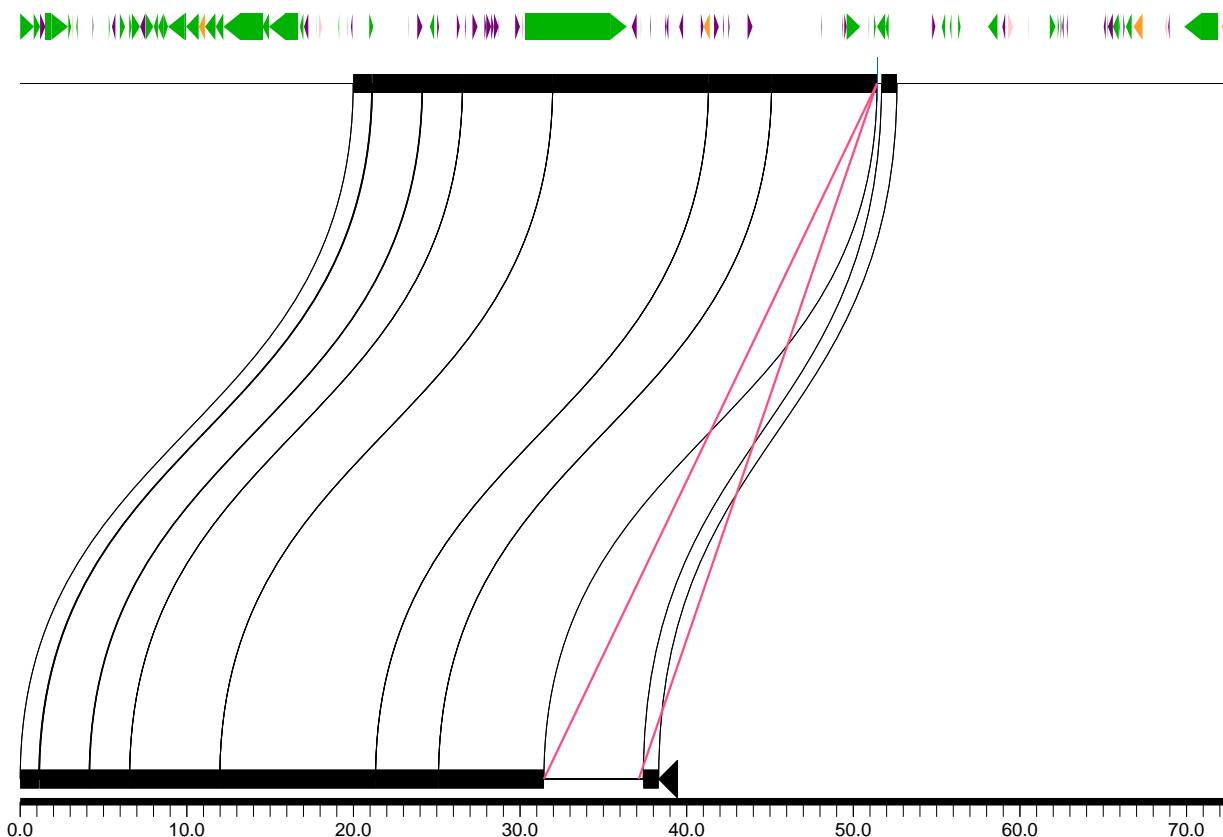

Clone file = AC221036.rc.fa

Insertion Size: 3326

Other Simple Repeat Low Complexity DNA LTR LINE SINE

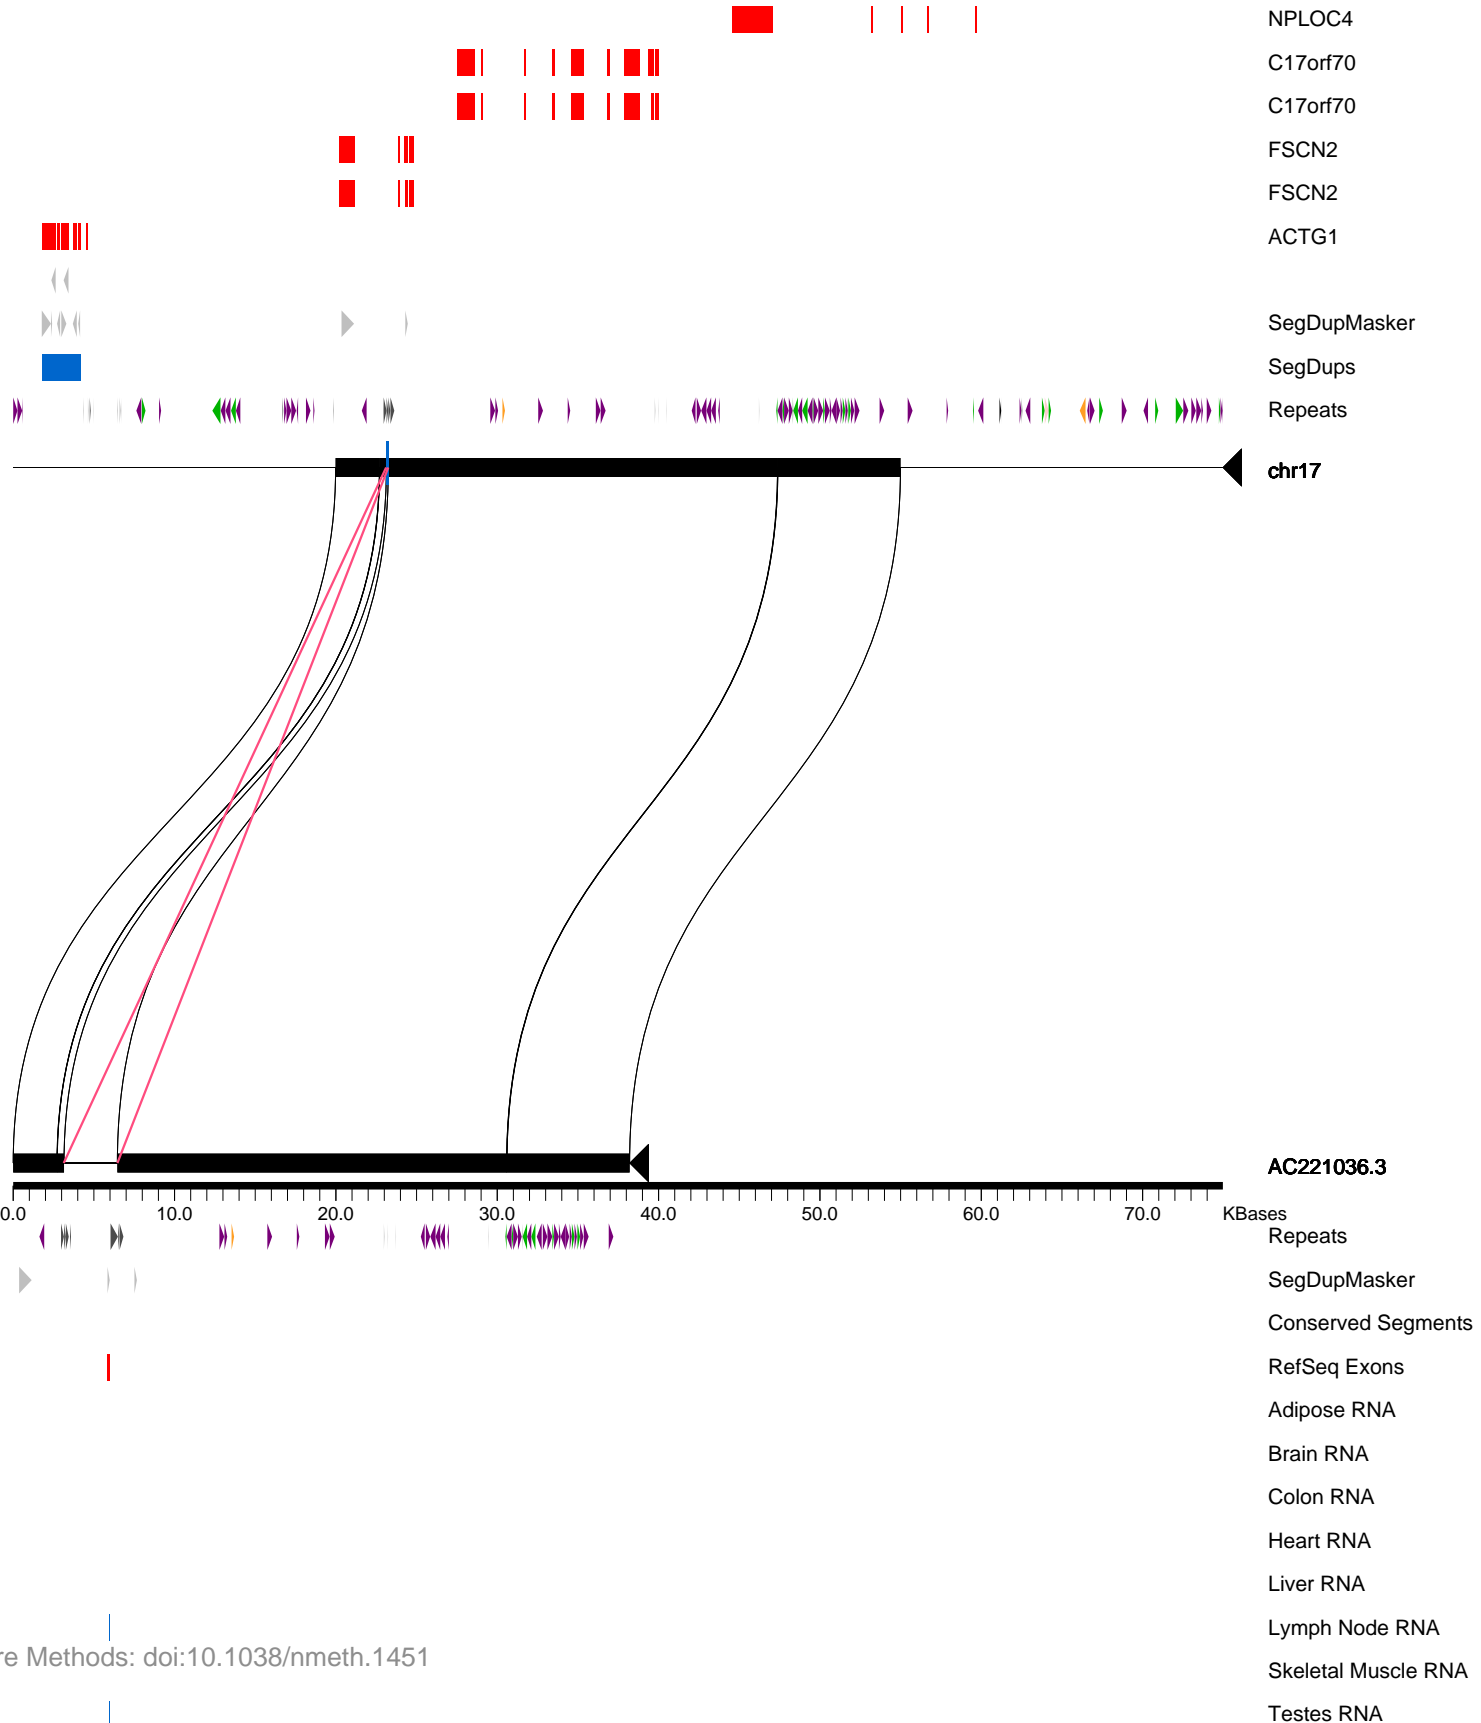

Clone file = AC221038.rc.fa

Insertion Size: 4460

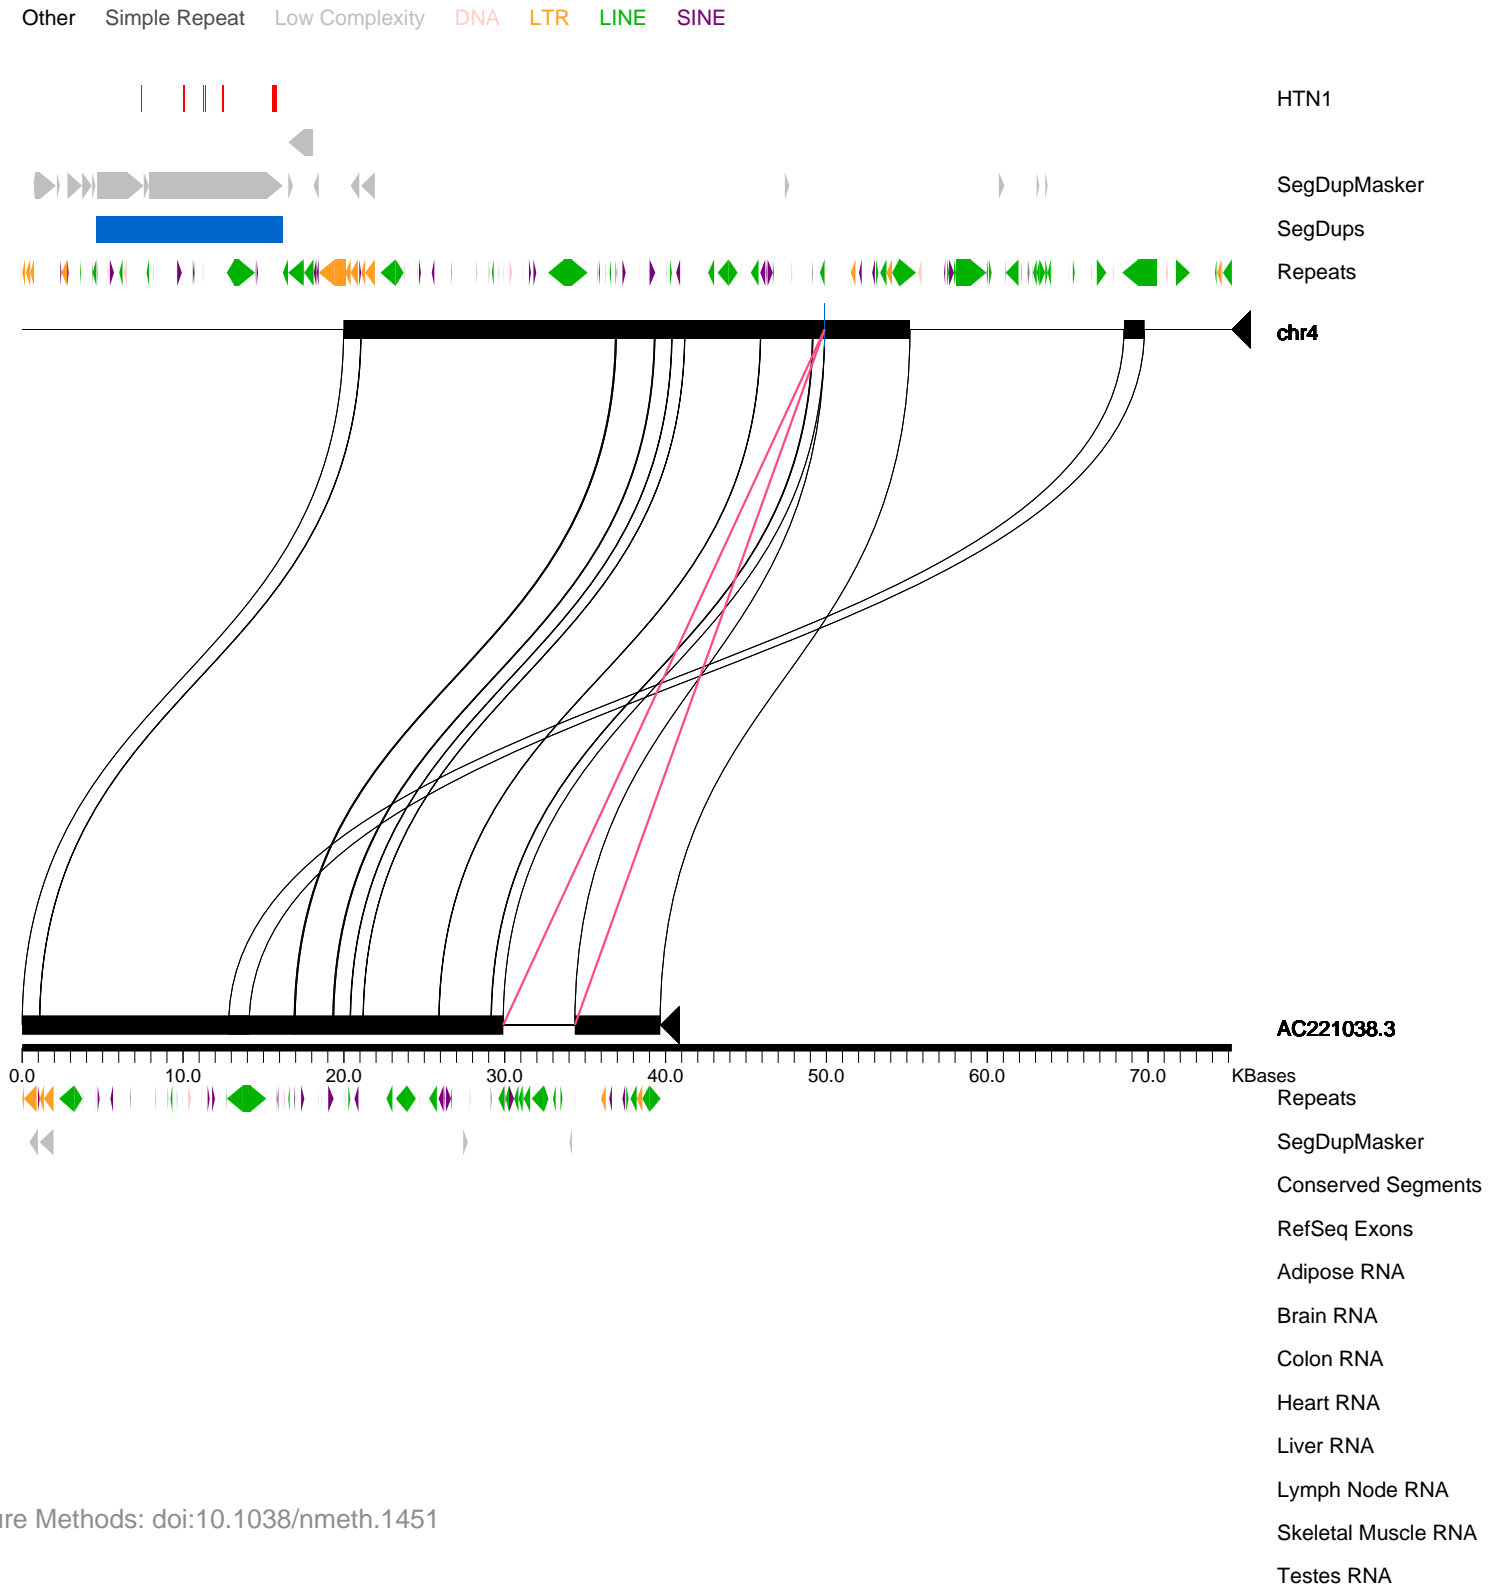

Clone file = AC222568.fa

Insertion Size: 3579

Other Simple Repeat Low Complexity DNA LTR LINE SINE

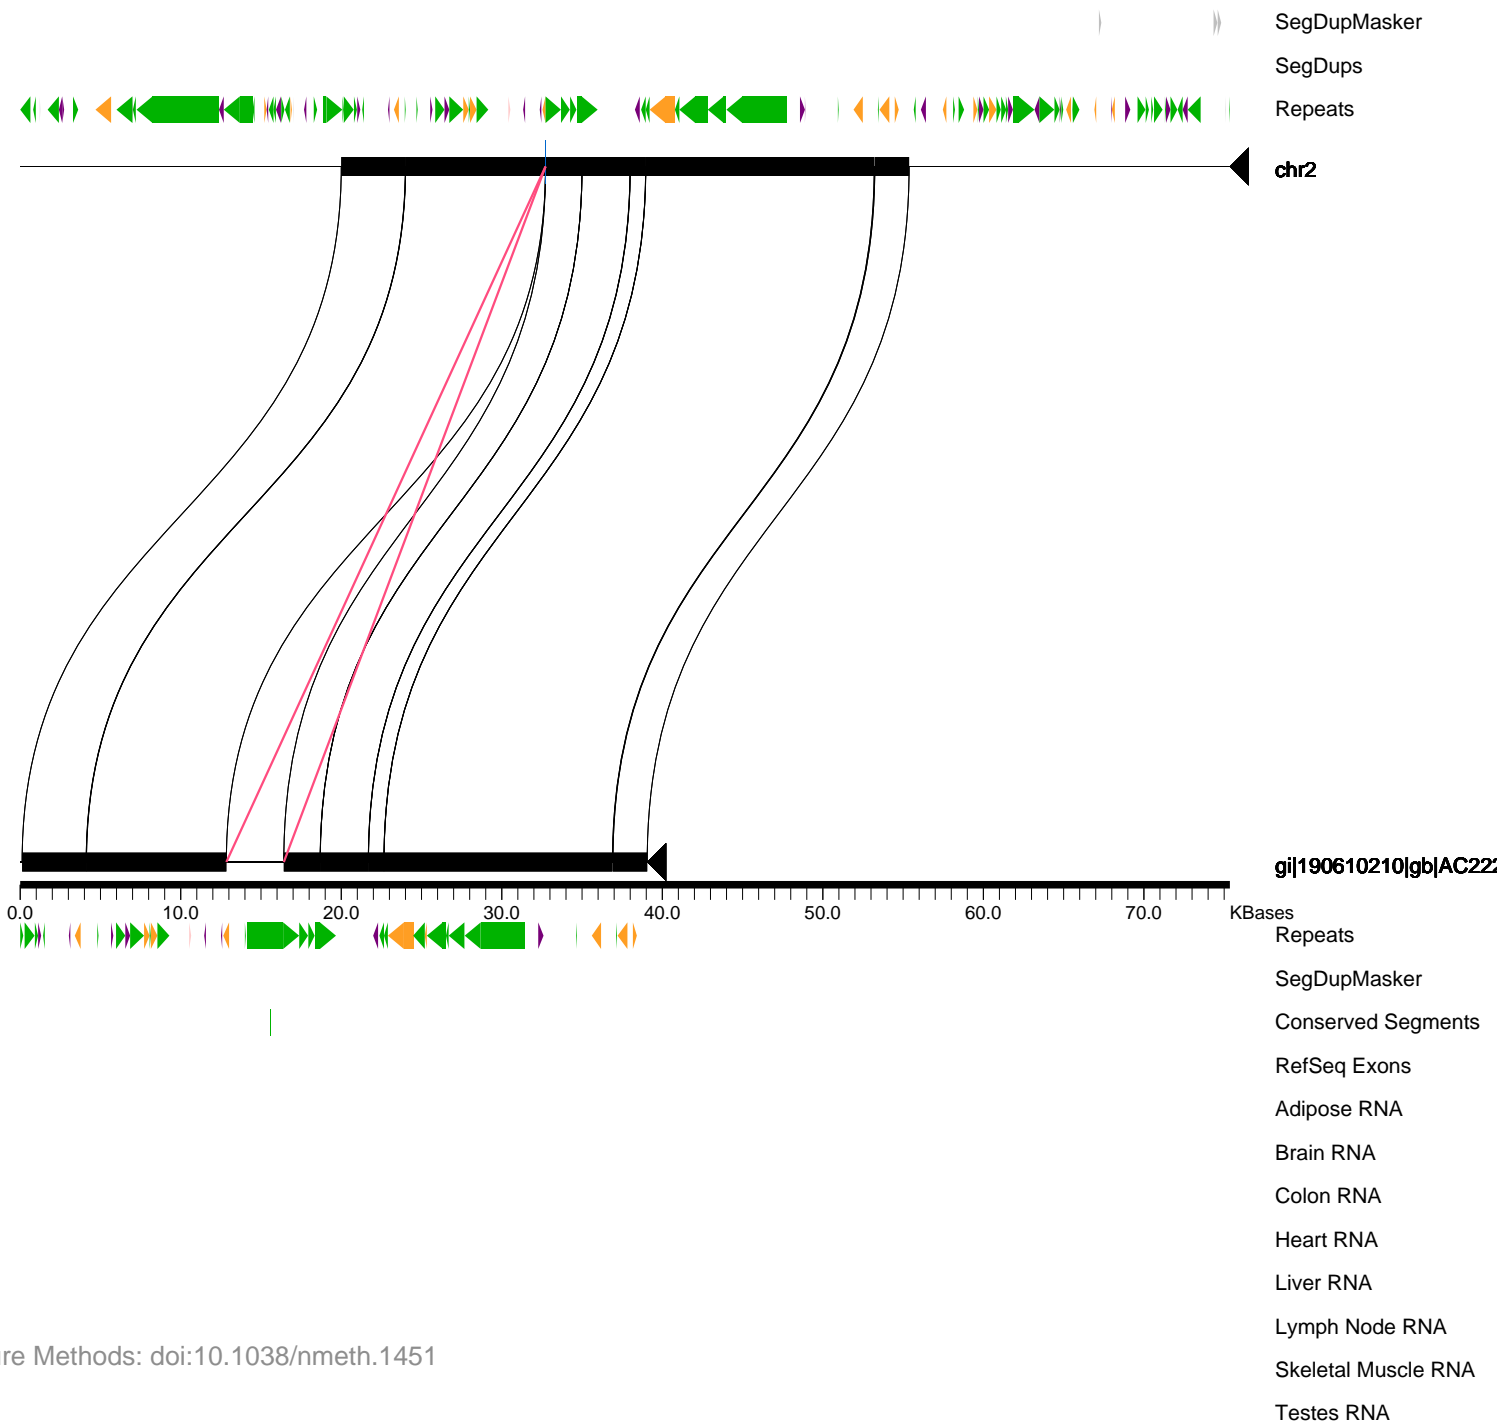



Clone file = AC222569.rc.fa

Insertion Size: 20156

Other Simple Repeat Low Complexity DNA LTR LINE SINE

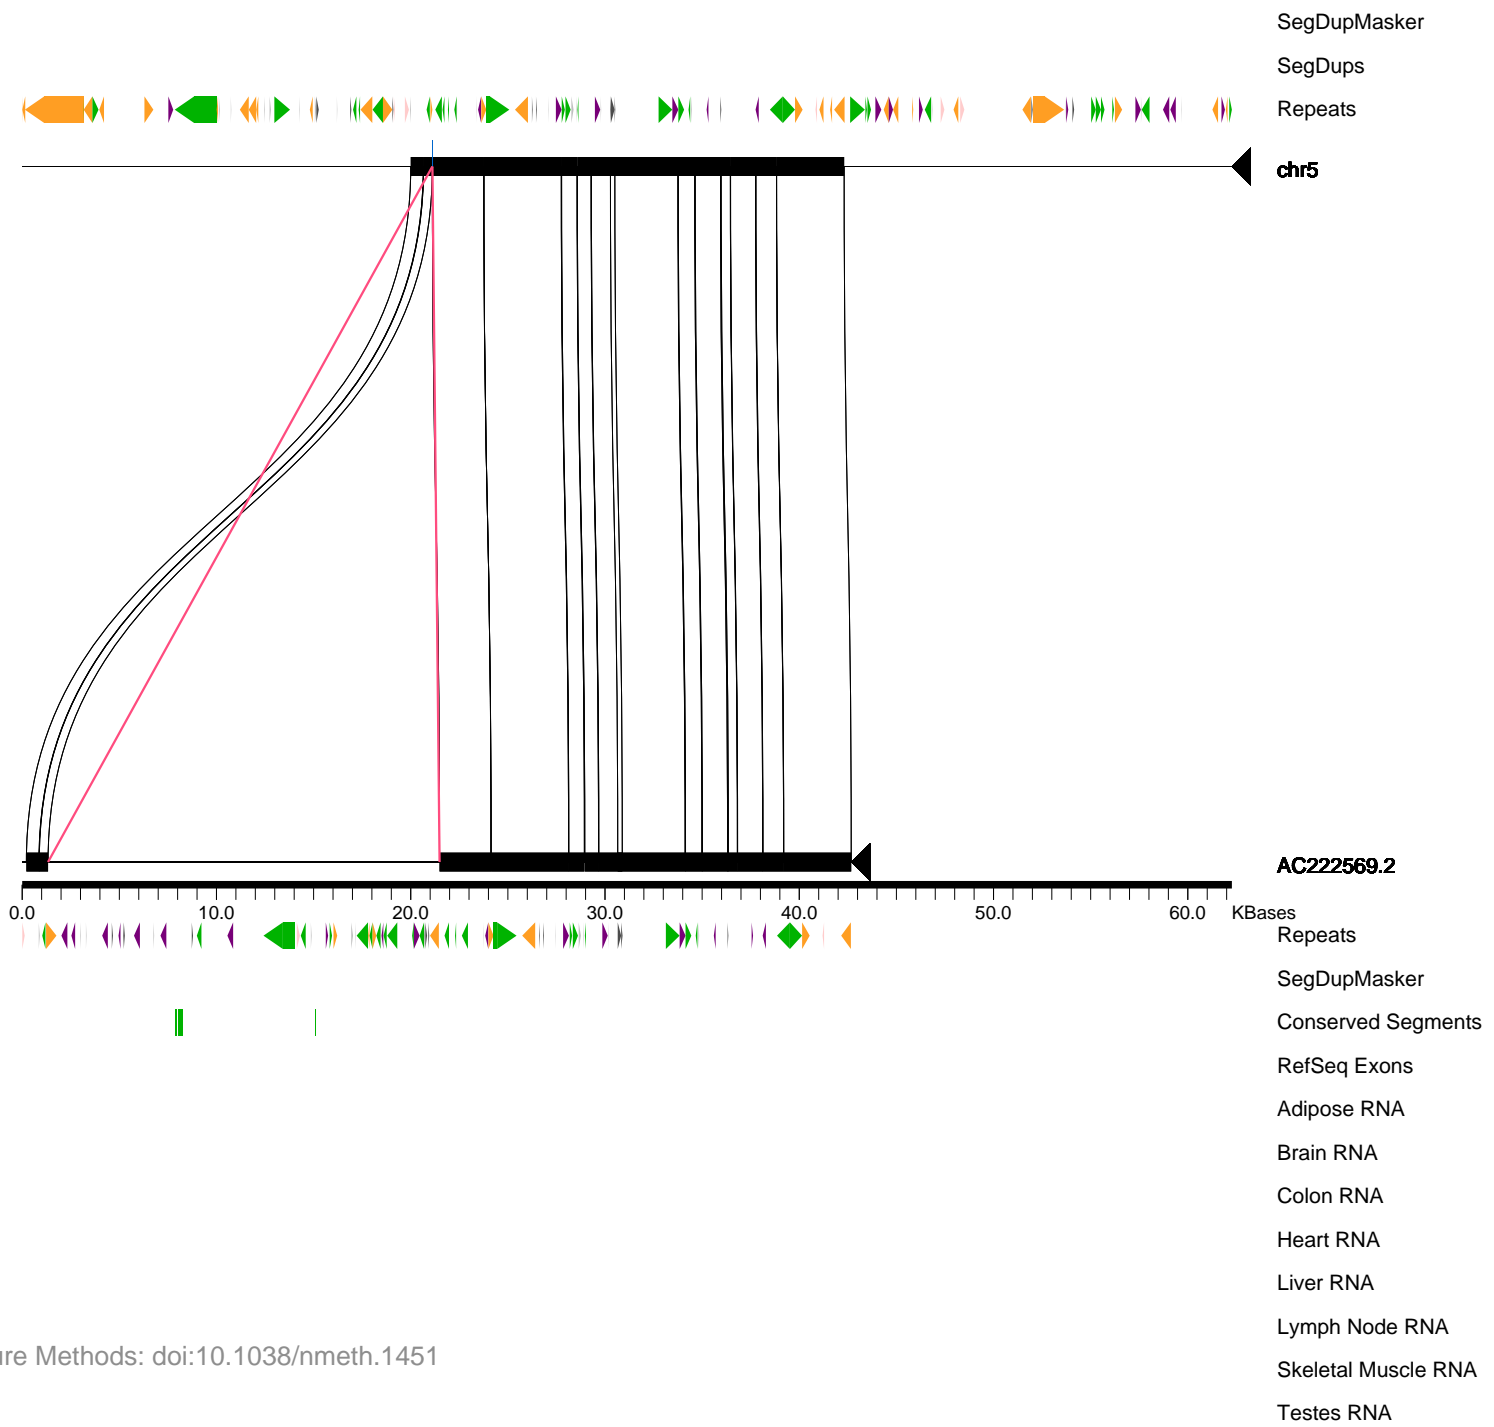

Clone file = AC222570.fa

Insertion Size: 2694

Other Simple Repeat Low Complexity DNA LTR LINE SINE

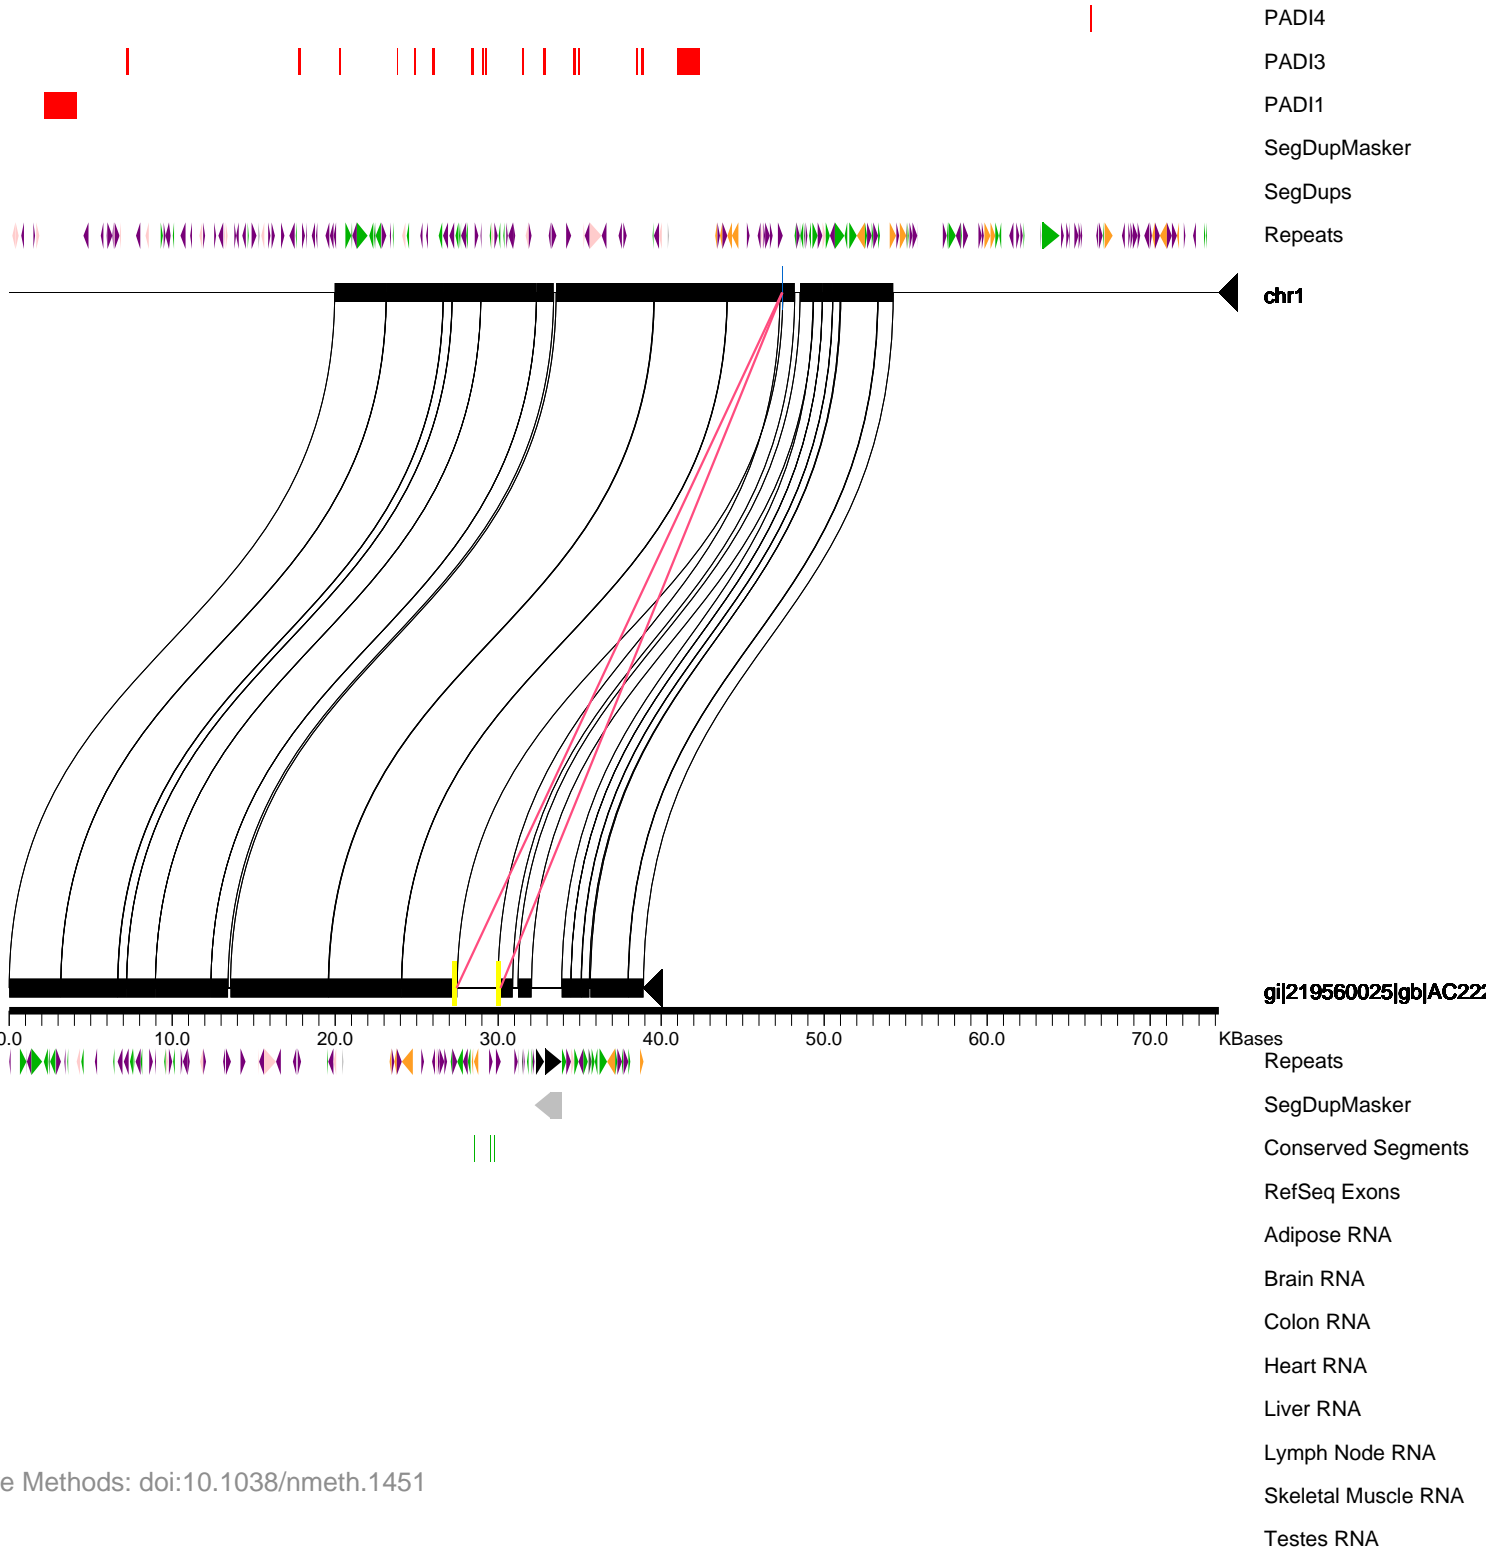

Clone file = AC223408.rc.fa

Insertion Size: 5283

Other Simple Repeat Low Complexity DNA LTR LINE SINE

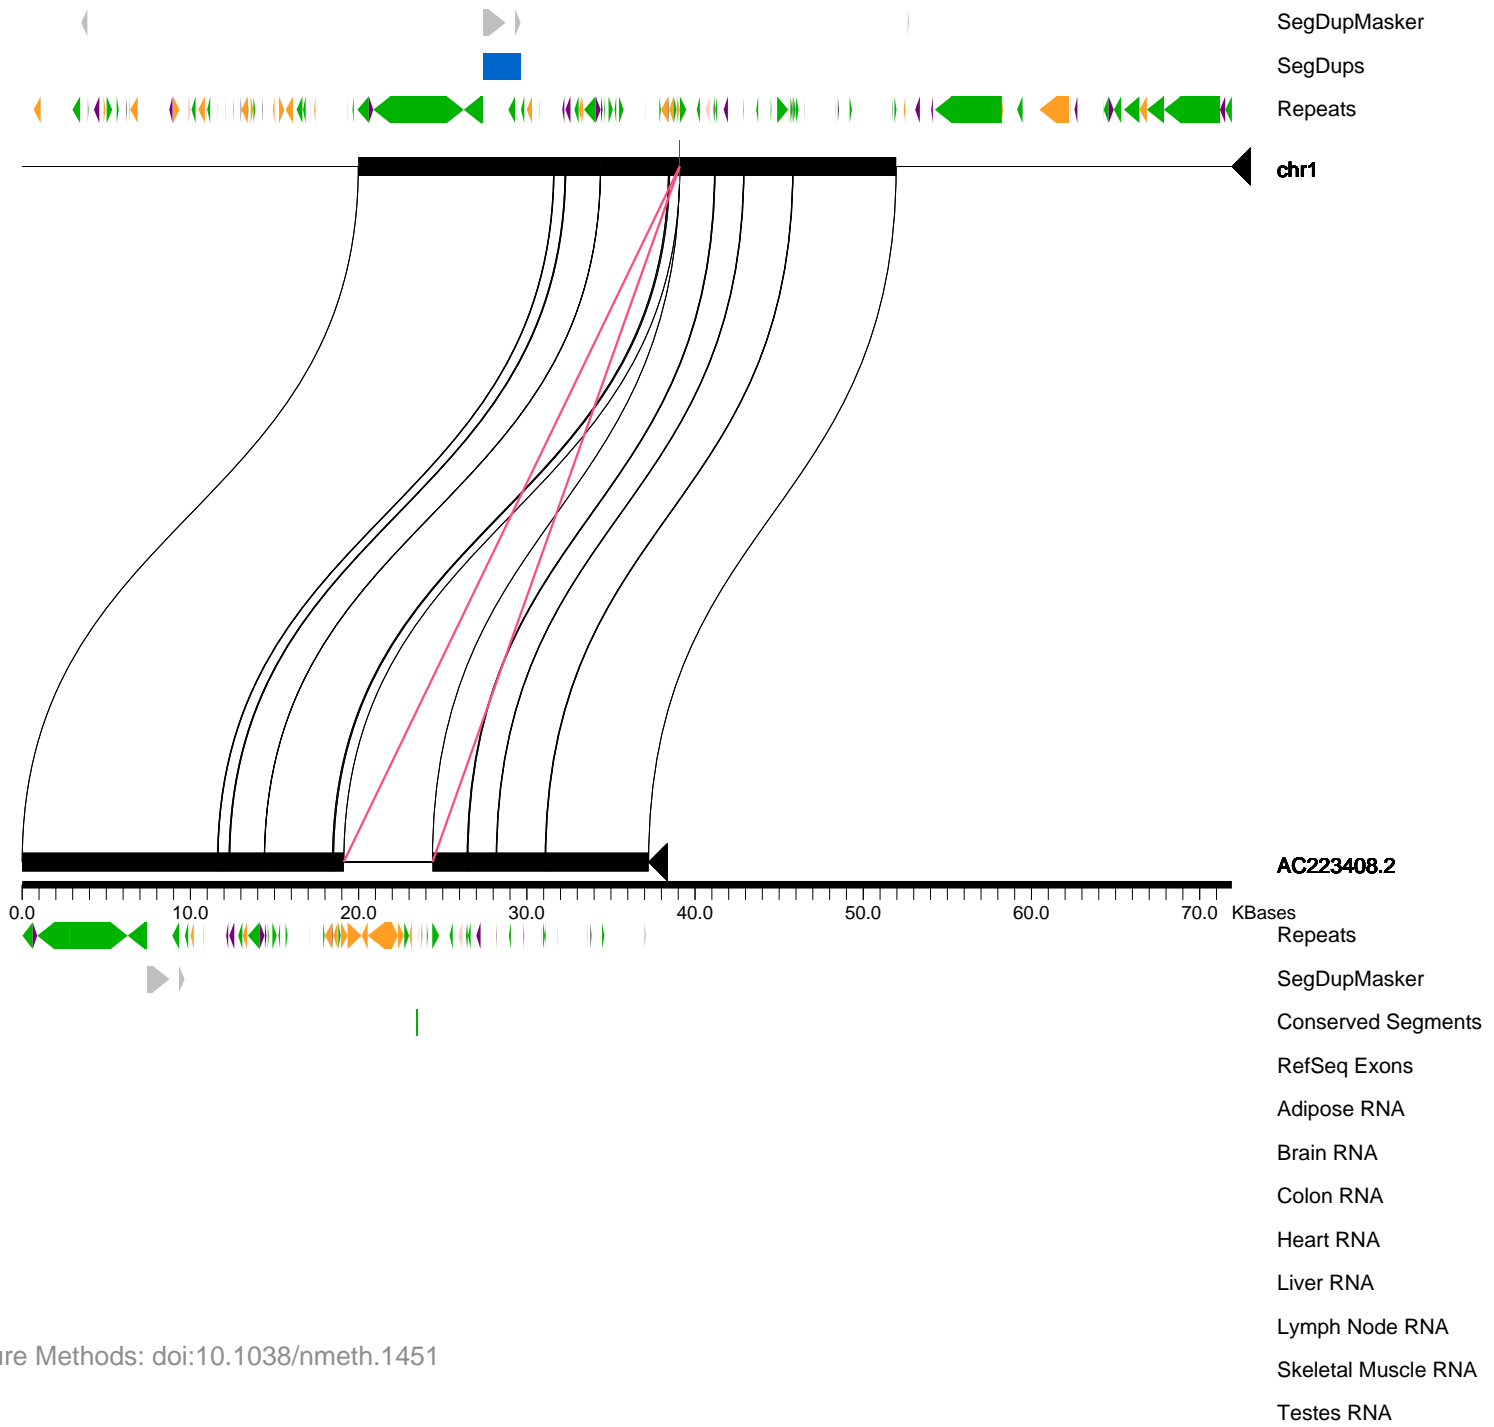

Clone file = AC223423.fa

Insertion Size: 3037

Other Simple Repeat Low Complexity DNA LTR LINE SINE

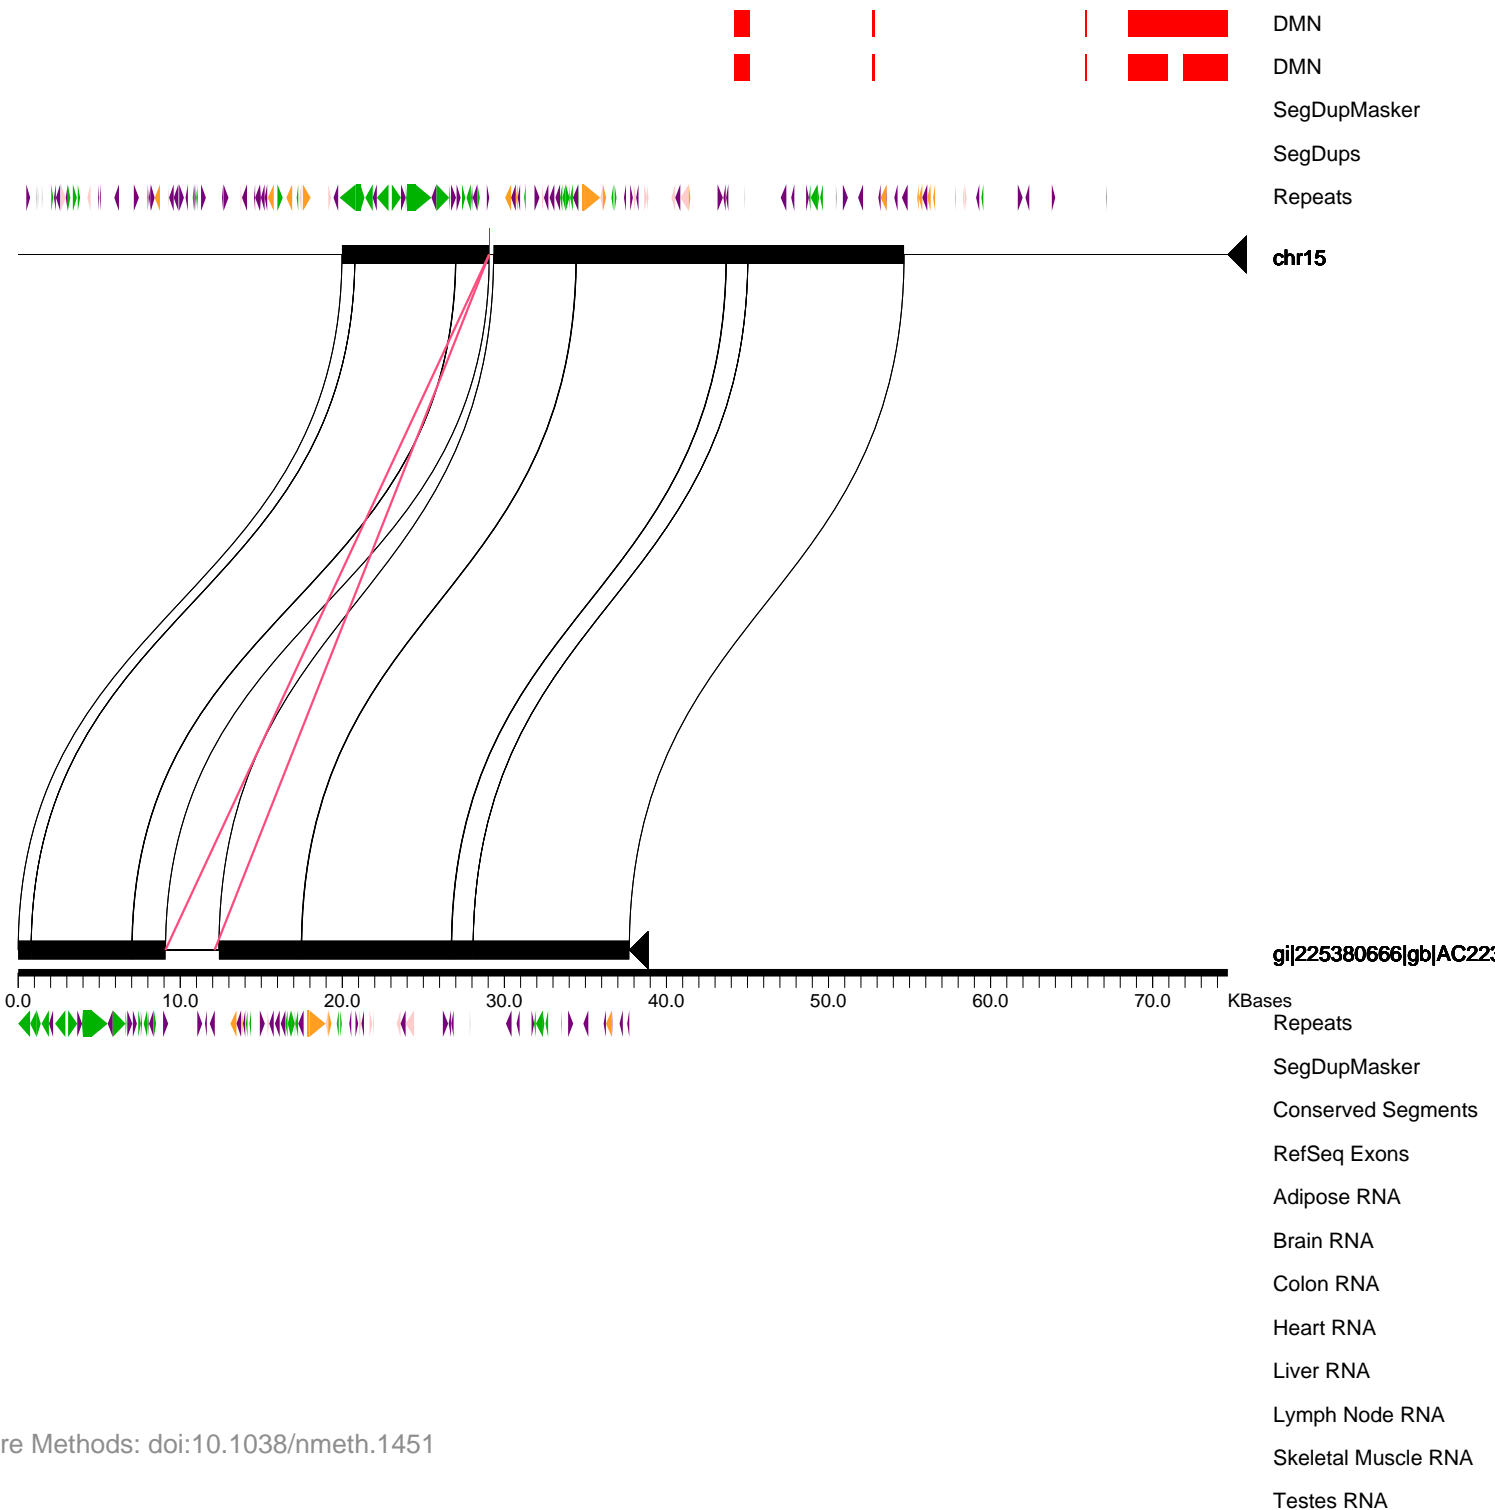

Clone file = AC223433.rc.fa

Insertion Size: 6887

Other Simple Repeat Low Complexity DNA LTR LINE SINE

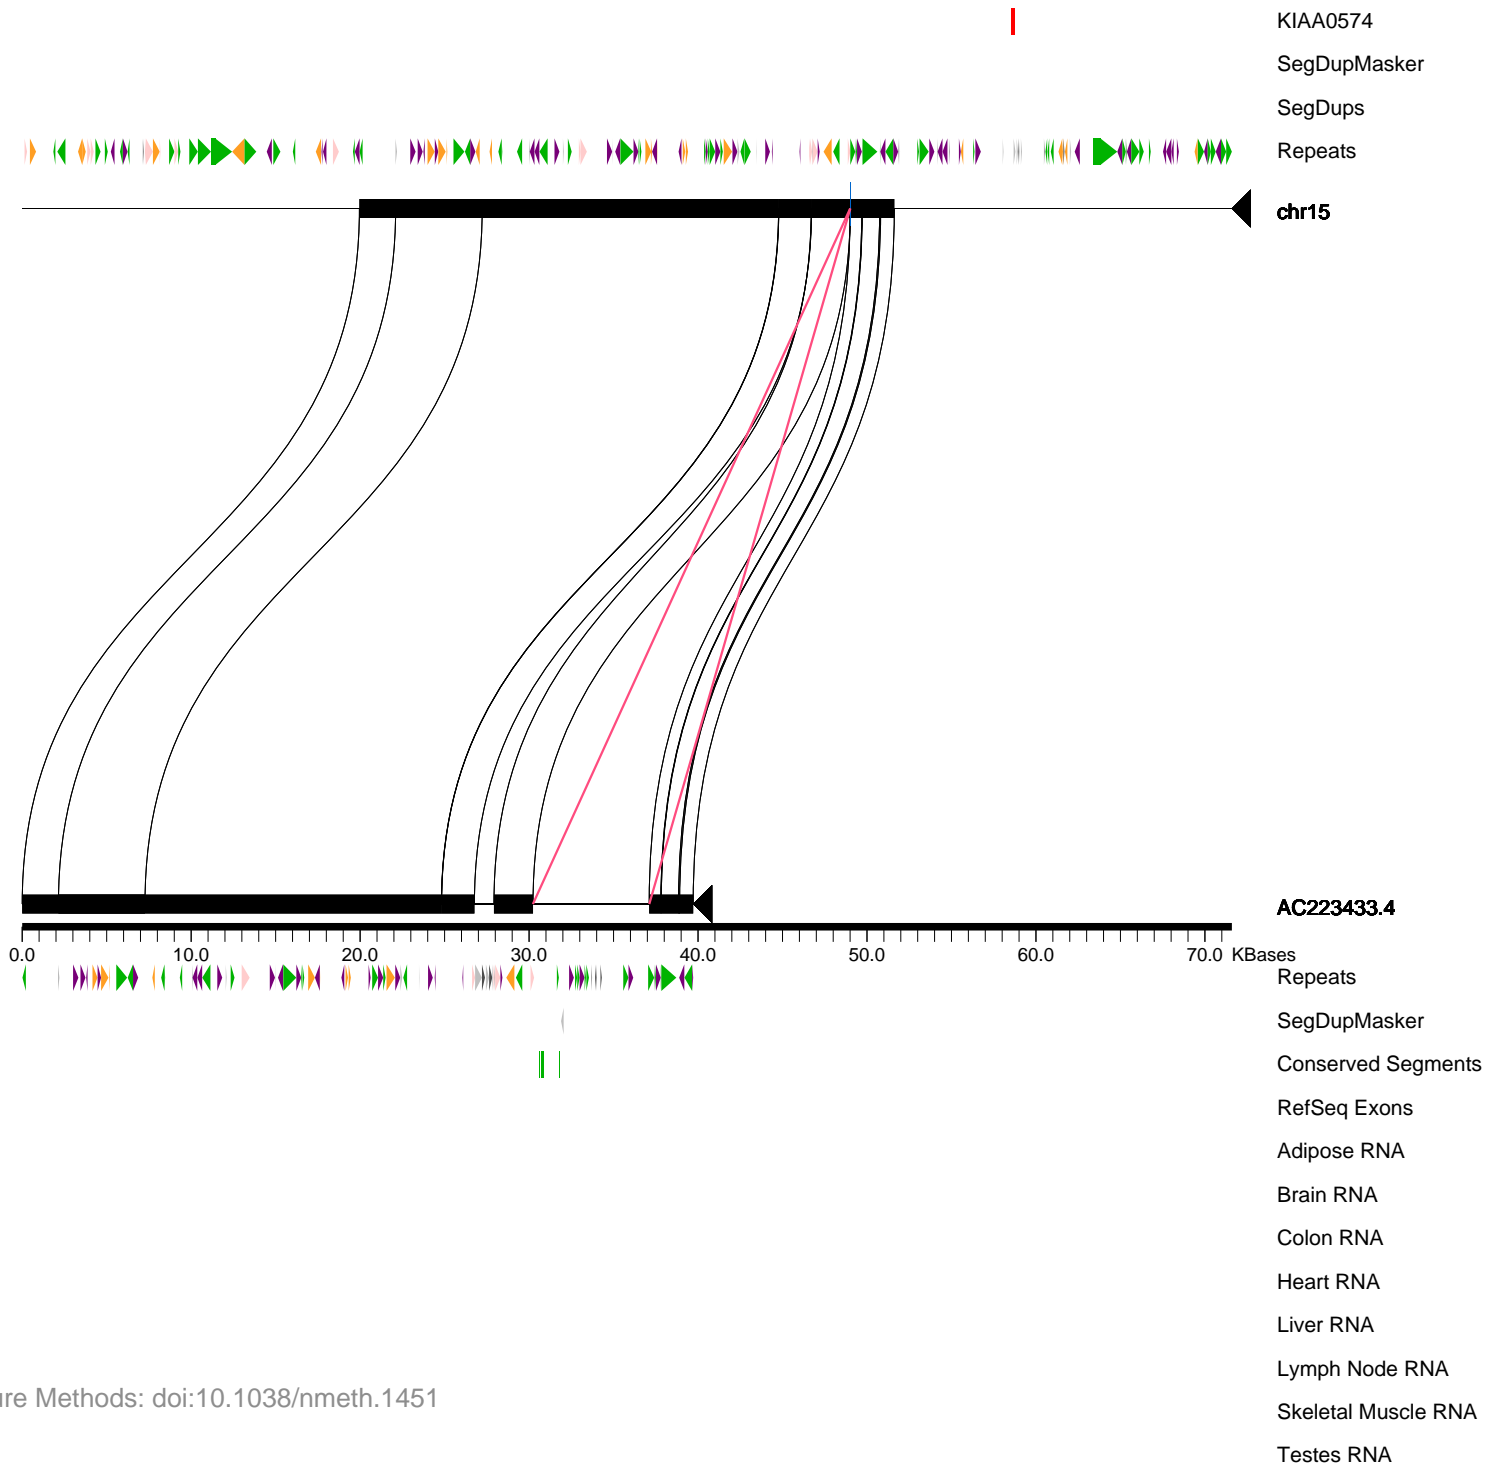

Clone file = AC225034.rc.fa

Insertion Size: 4010

Other Simple Repeat Low Complexity DNA LTR LINE SINE

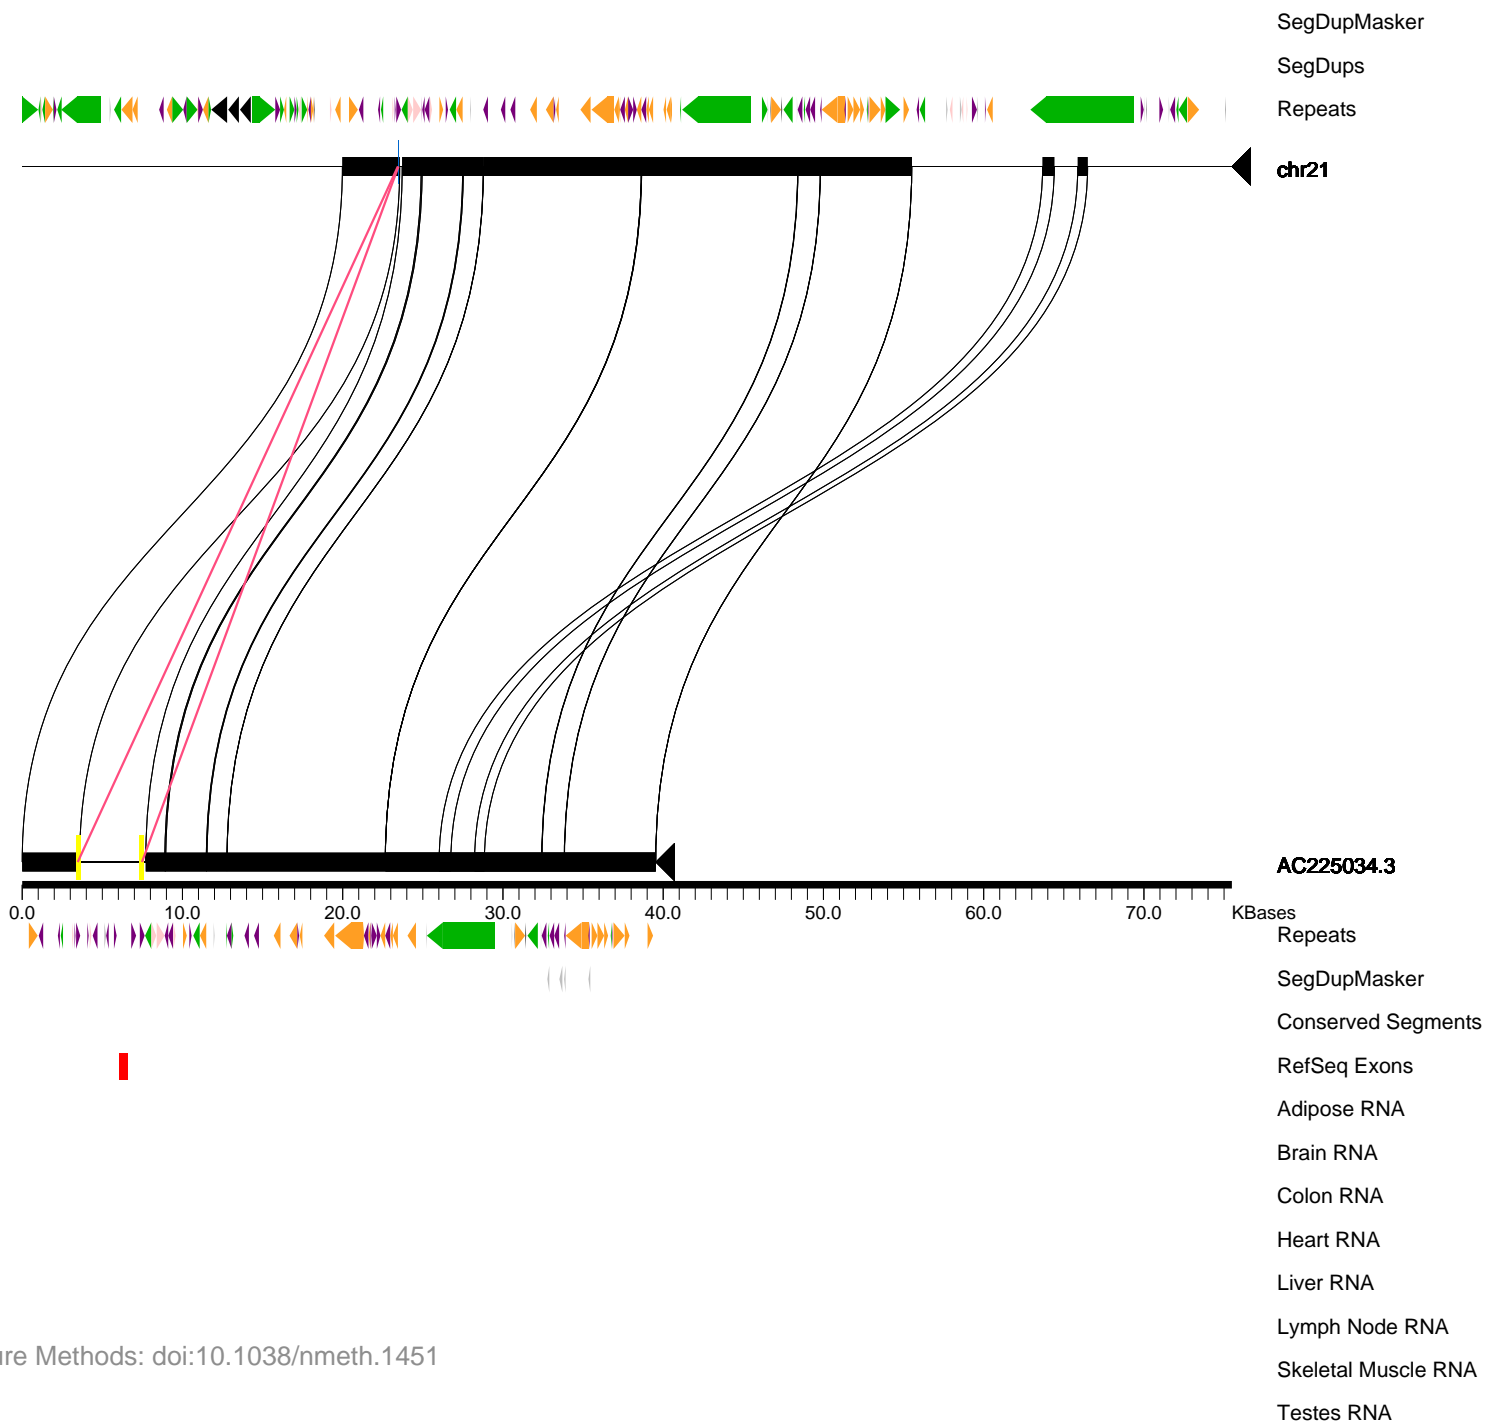

Clone file = AC225099.fa

Insertion Size: 4375

Other Simple Repeat Low Complexity DNA LTR LINE SINE

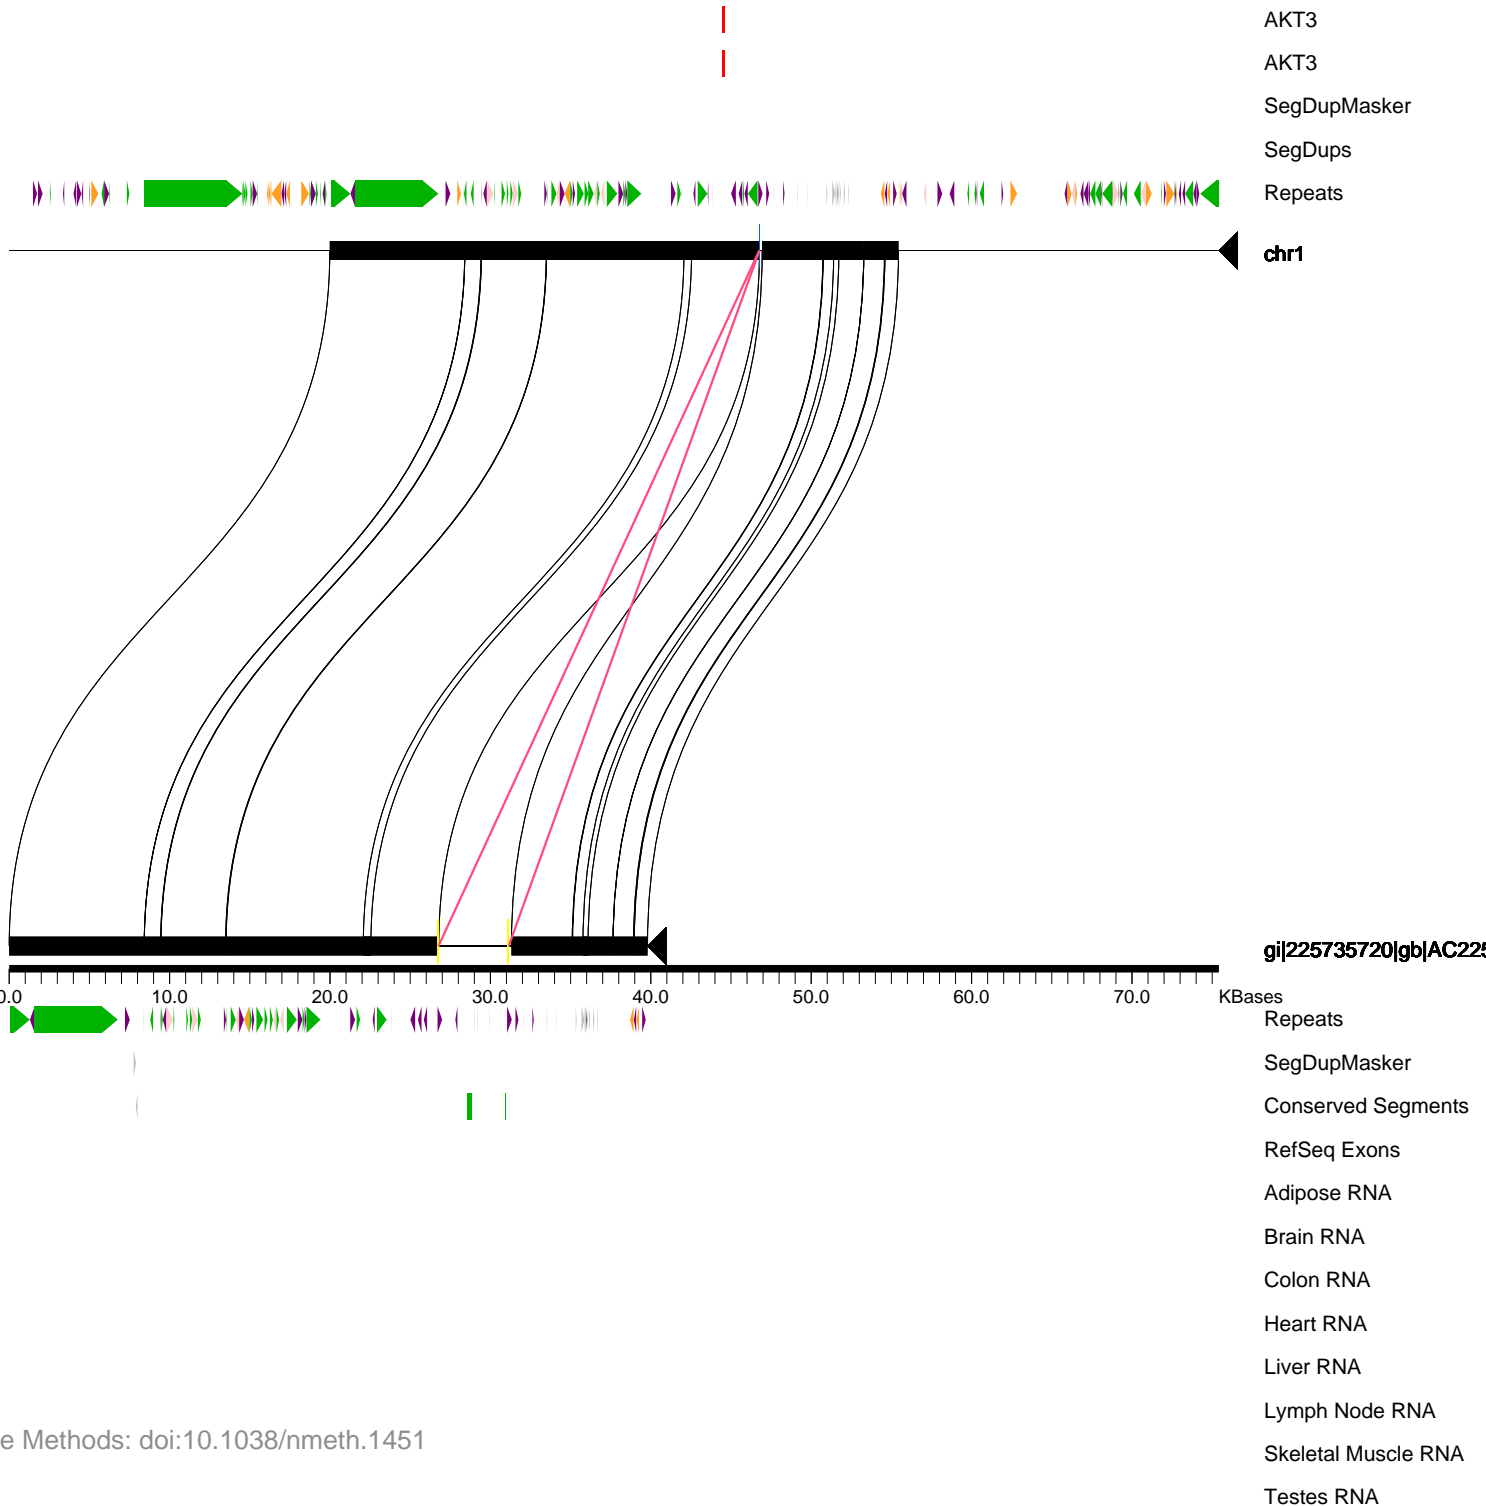

Clone file = AC225603.rc.fa

Insertion Size: 1490

Other Simple Repeat Low Complexity DNA LTR LINE SINE

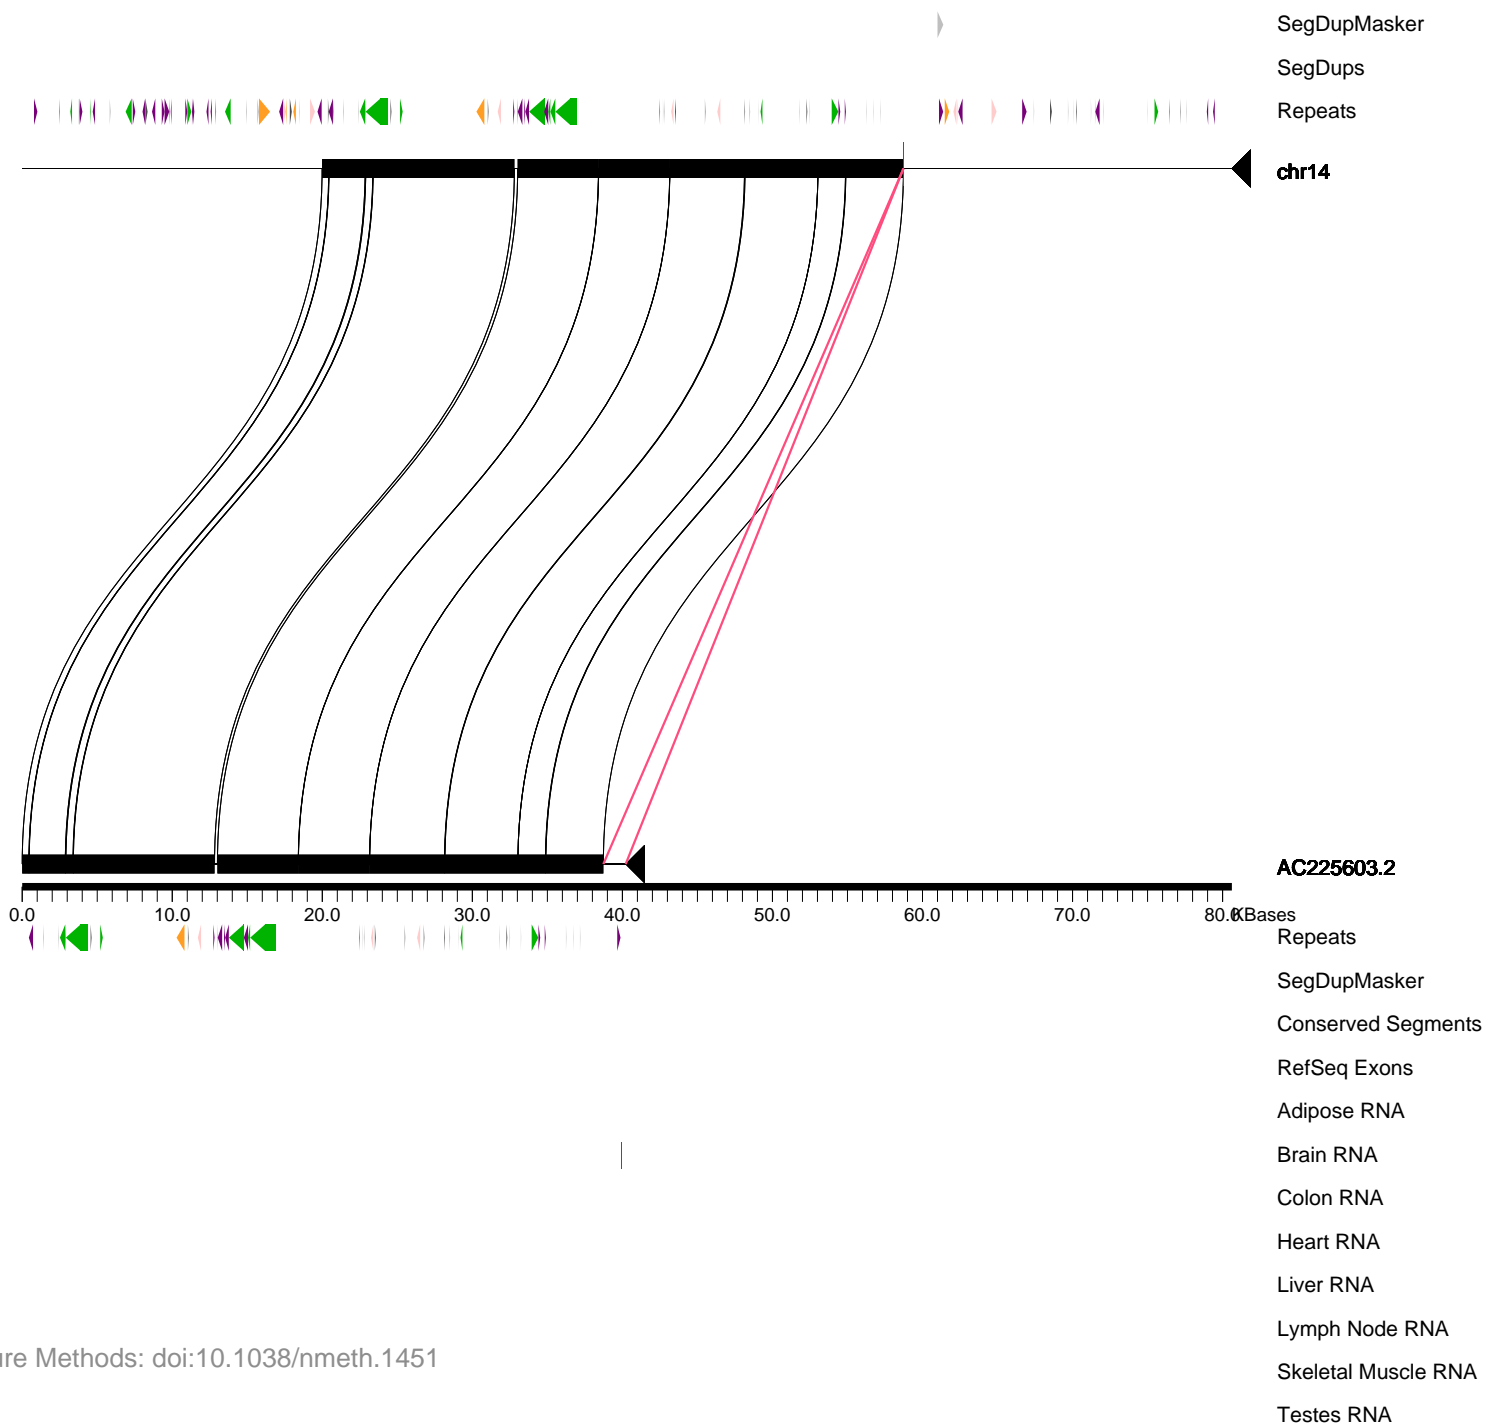



Clone file = AC225617.fa

Insertion Size: 1413

Other Simple Repeat Low Complexity DNA LTR LINE SINE

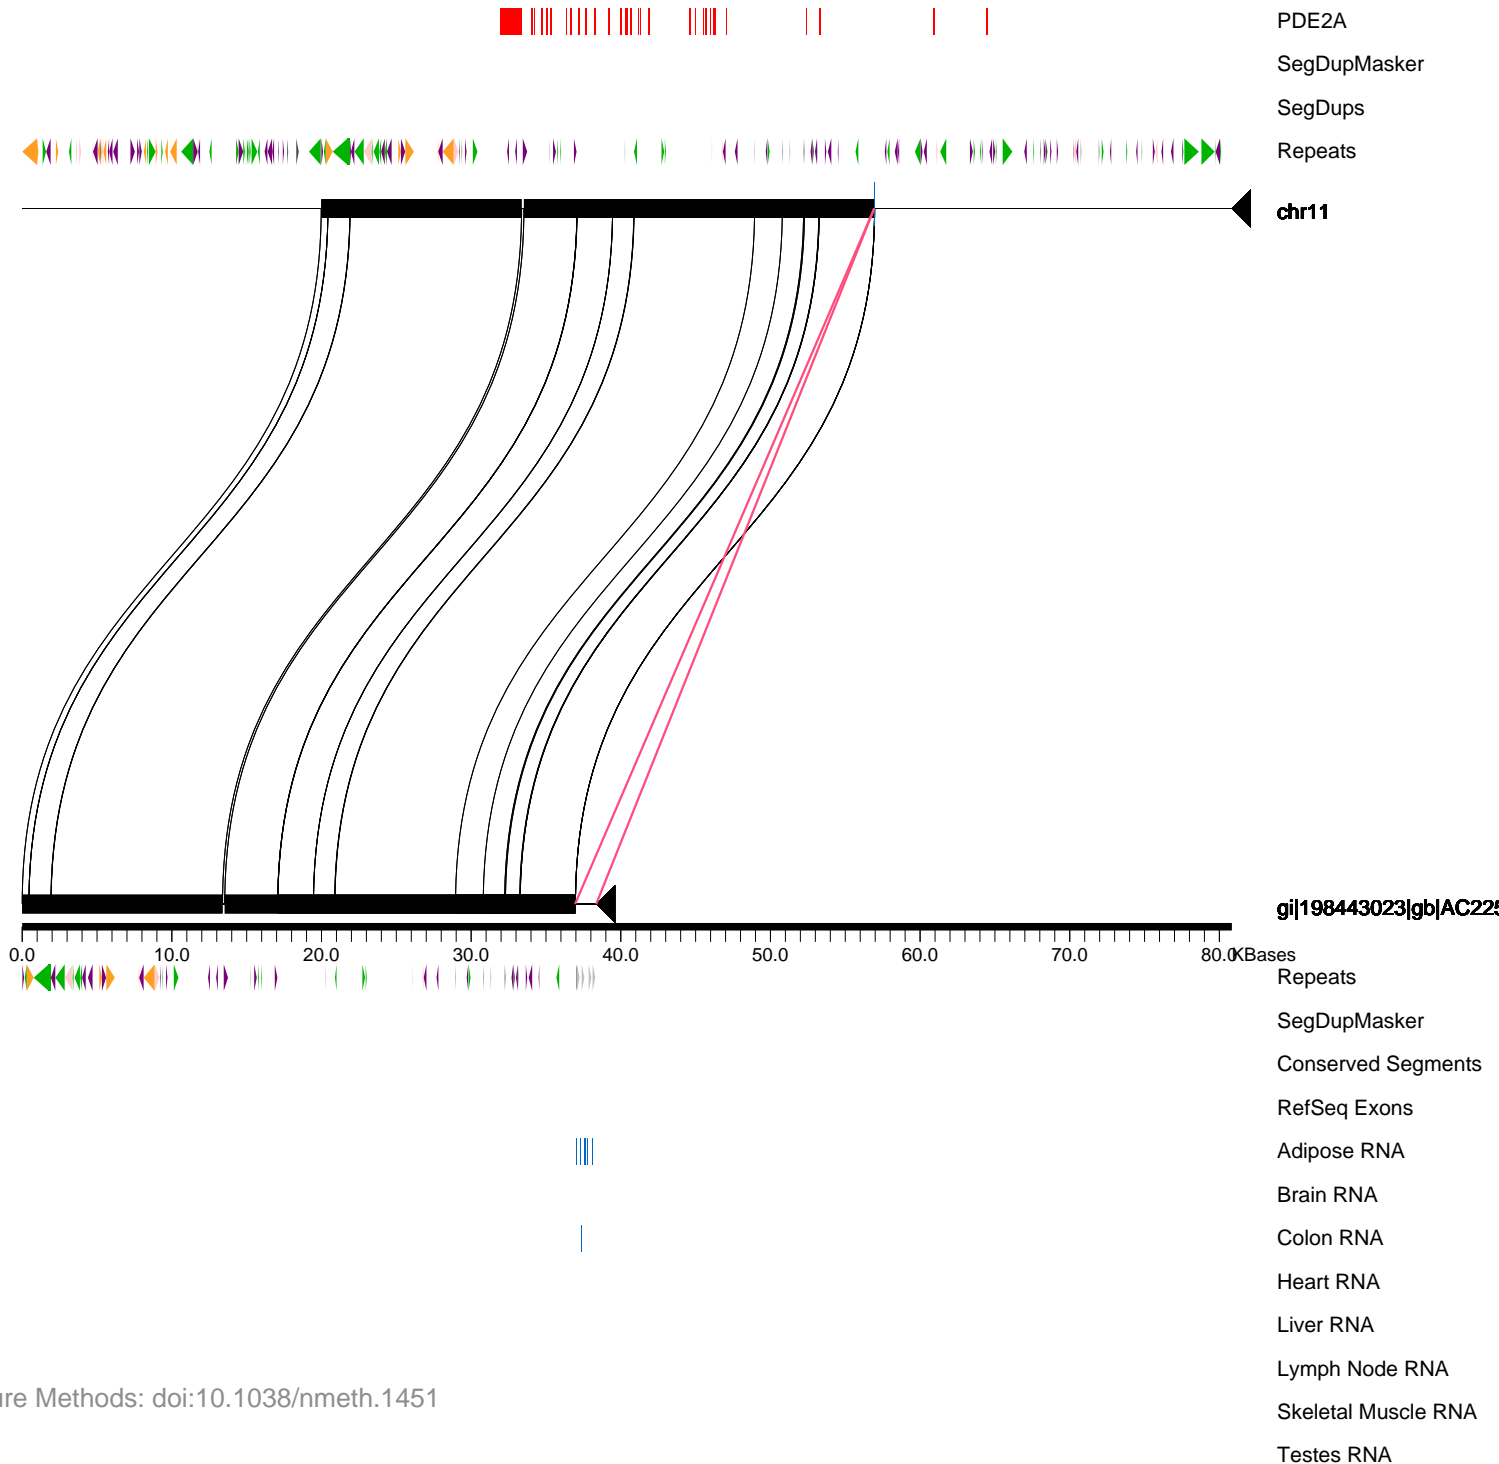

Clone file = AC225707.rc.fa

Insertion Size: 7234

Other Simple Repeat Low Complexity DNA LTR LINE SINE

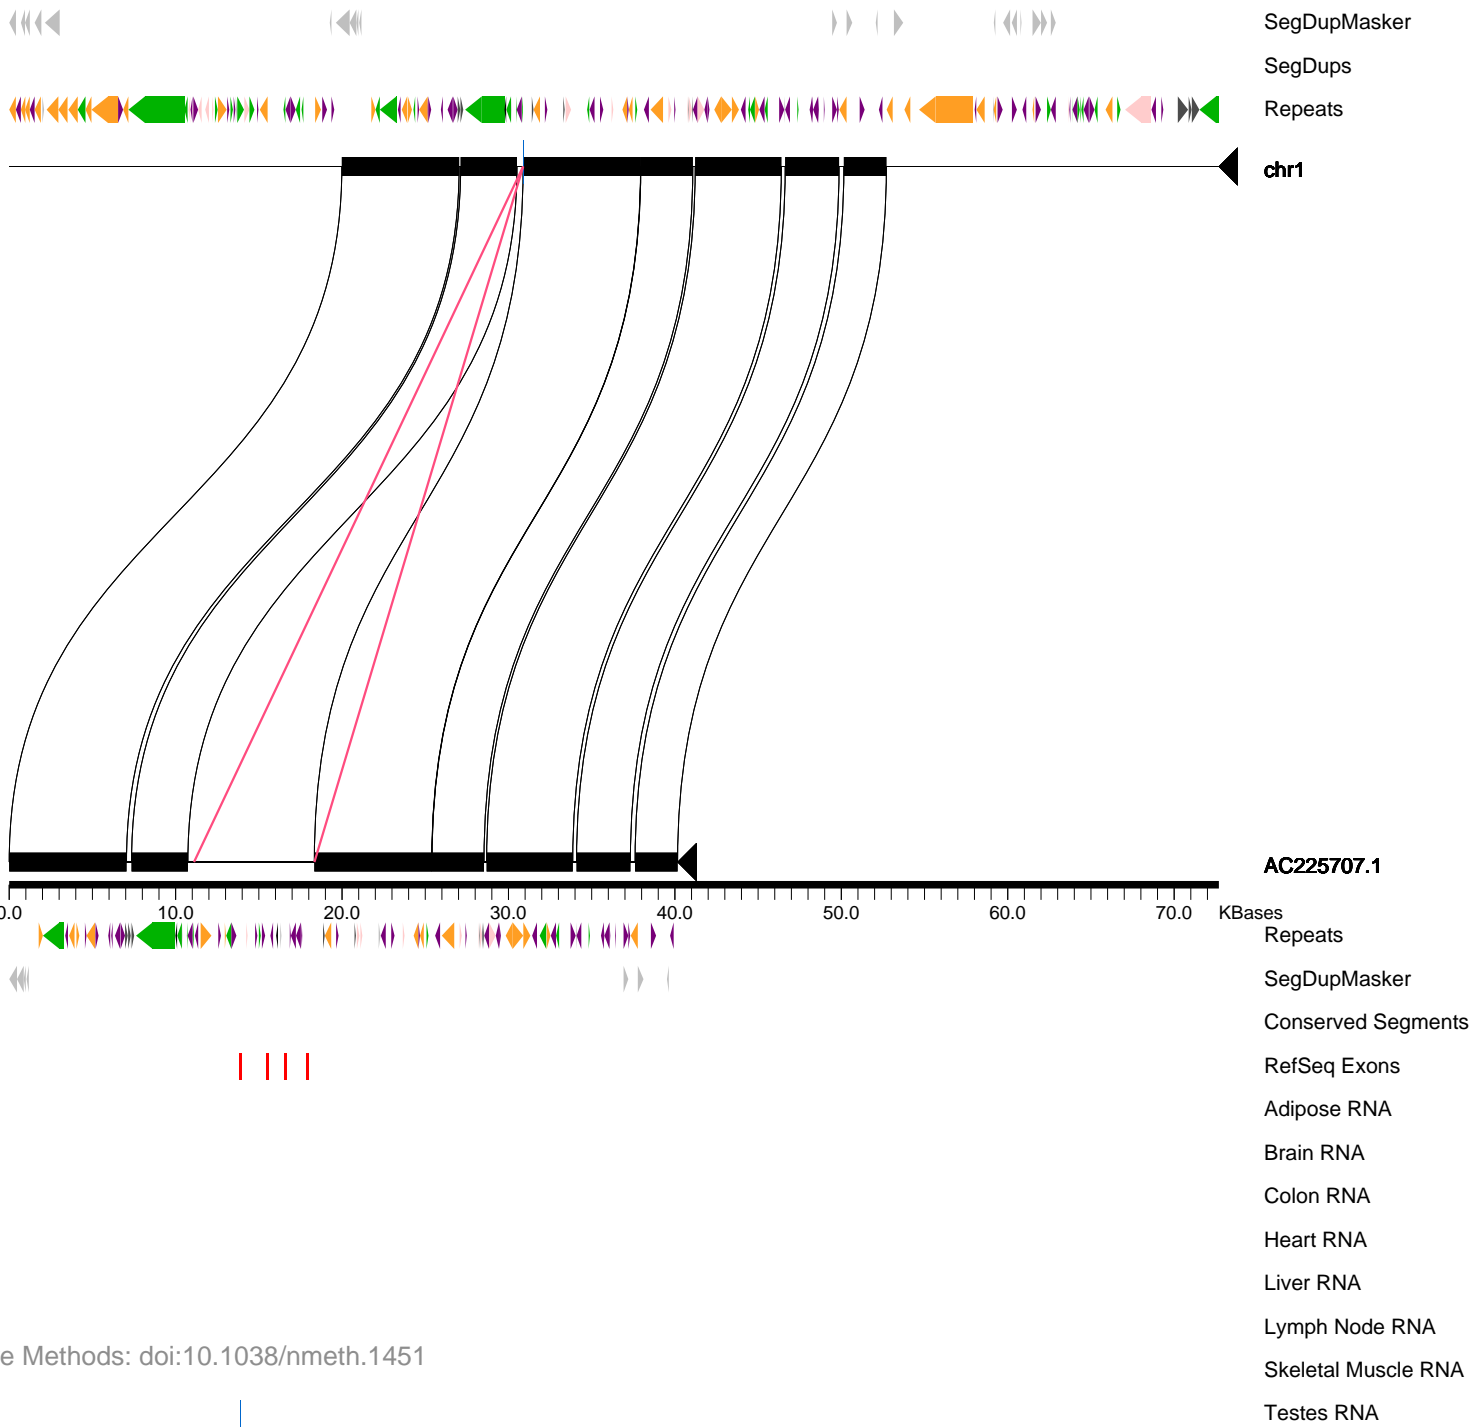

Clone file = AC225710.rc.fa

Insertion Size: 4705

Other Simple Repeat Low Complexity DNA LTR LINE SINE

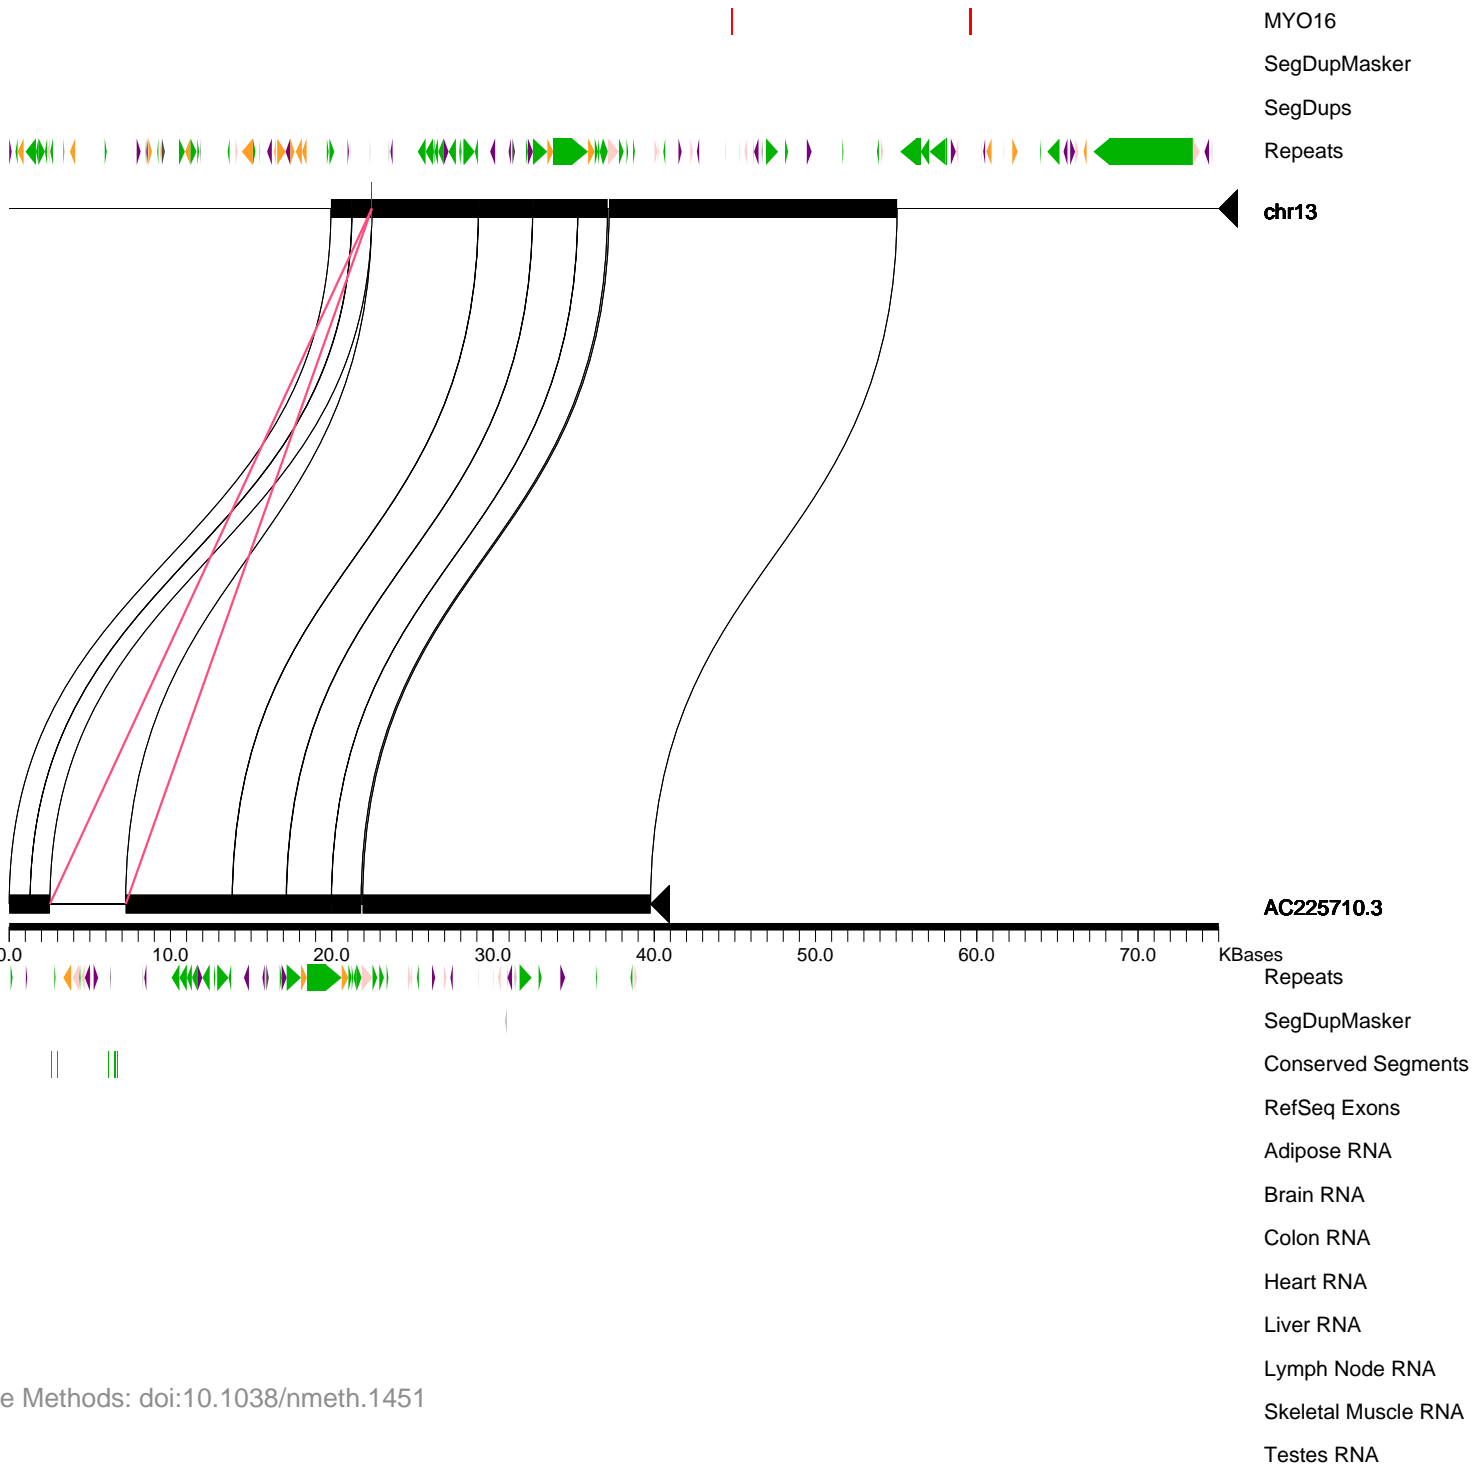

Clone file = AC225712.fa

Insertion Size: 4975

Other Simple Repeat Low Complexity DNA LTR LINE SINE

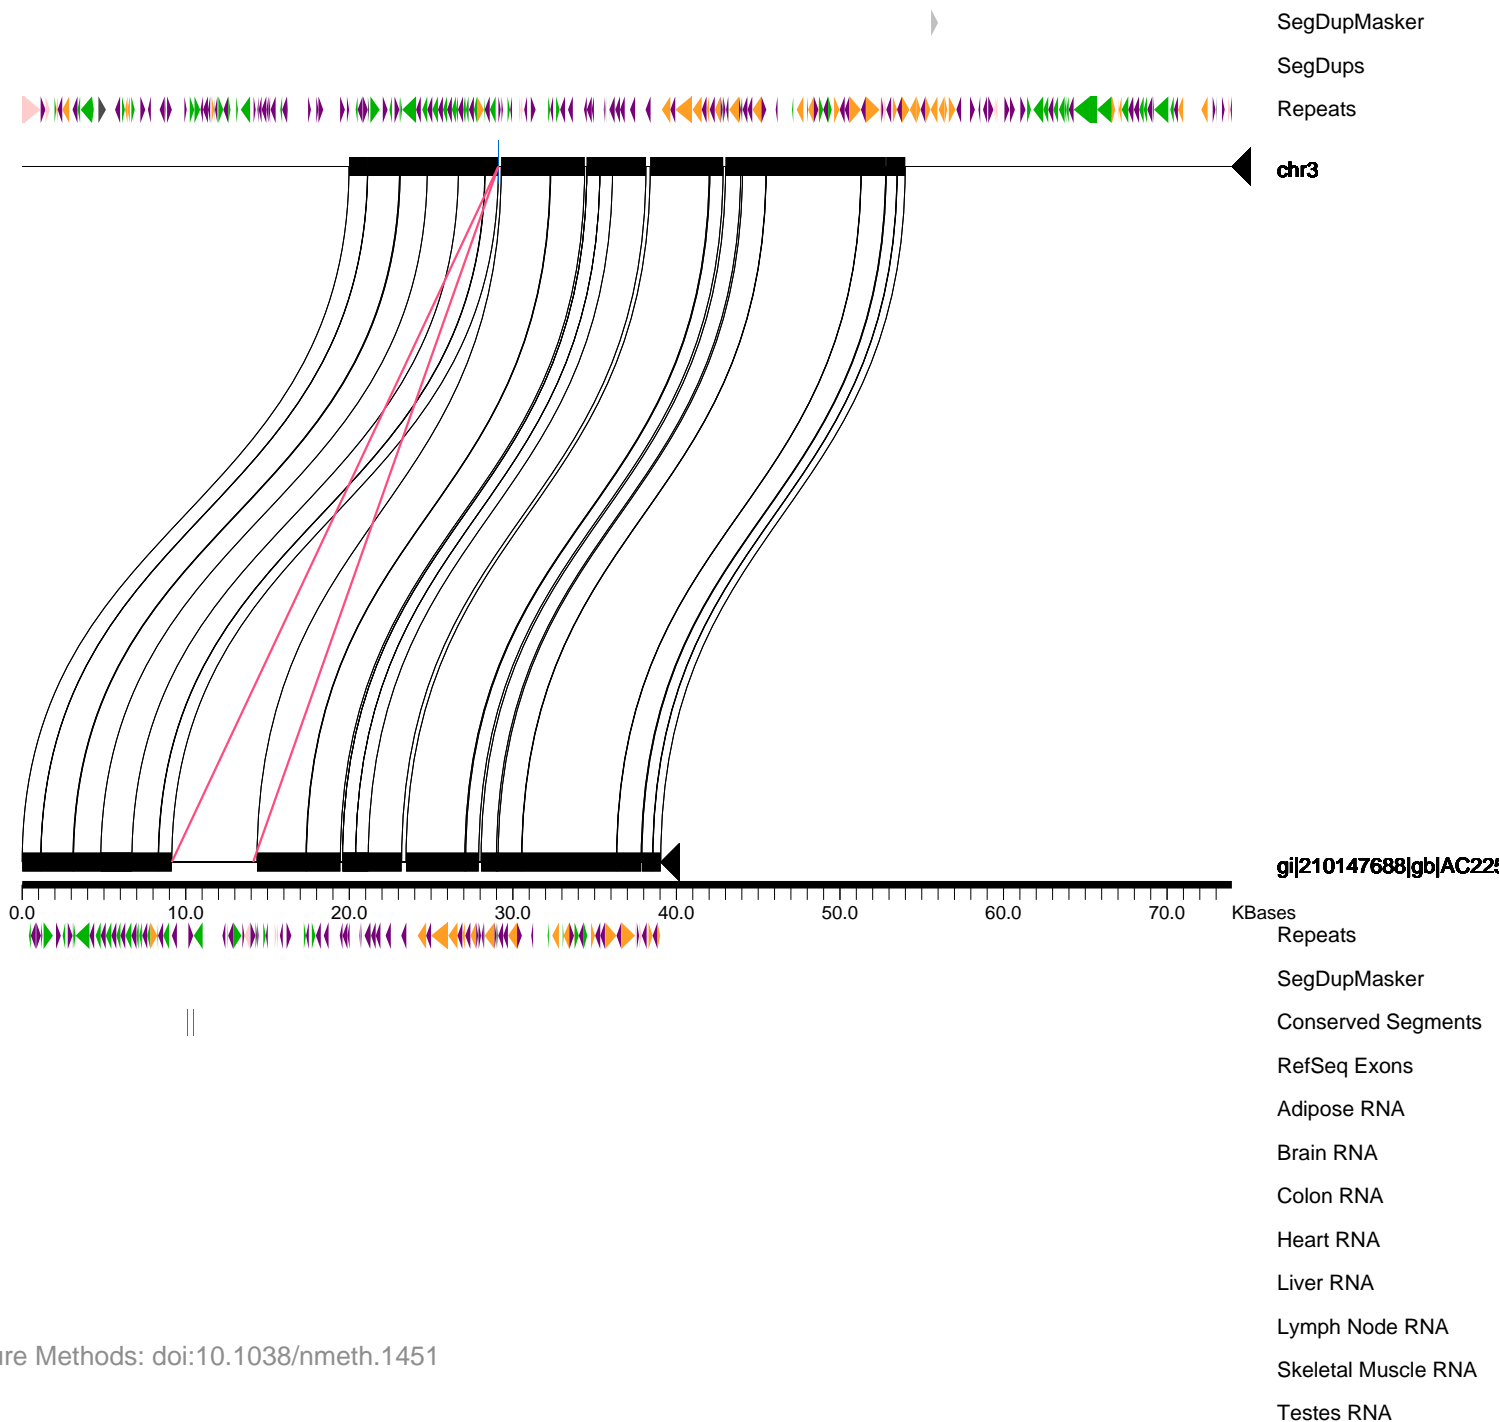

Clone file = AC225728.rc.fa

Insertion Size: 2674

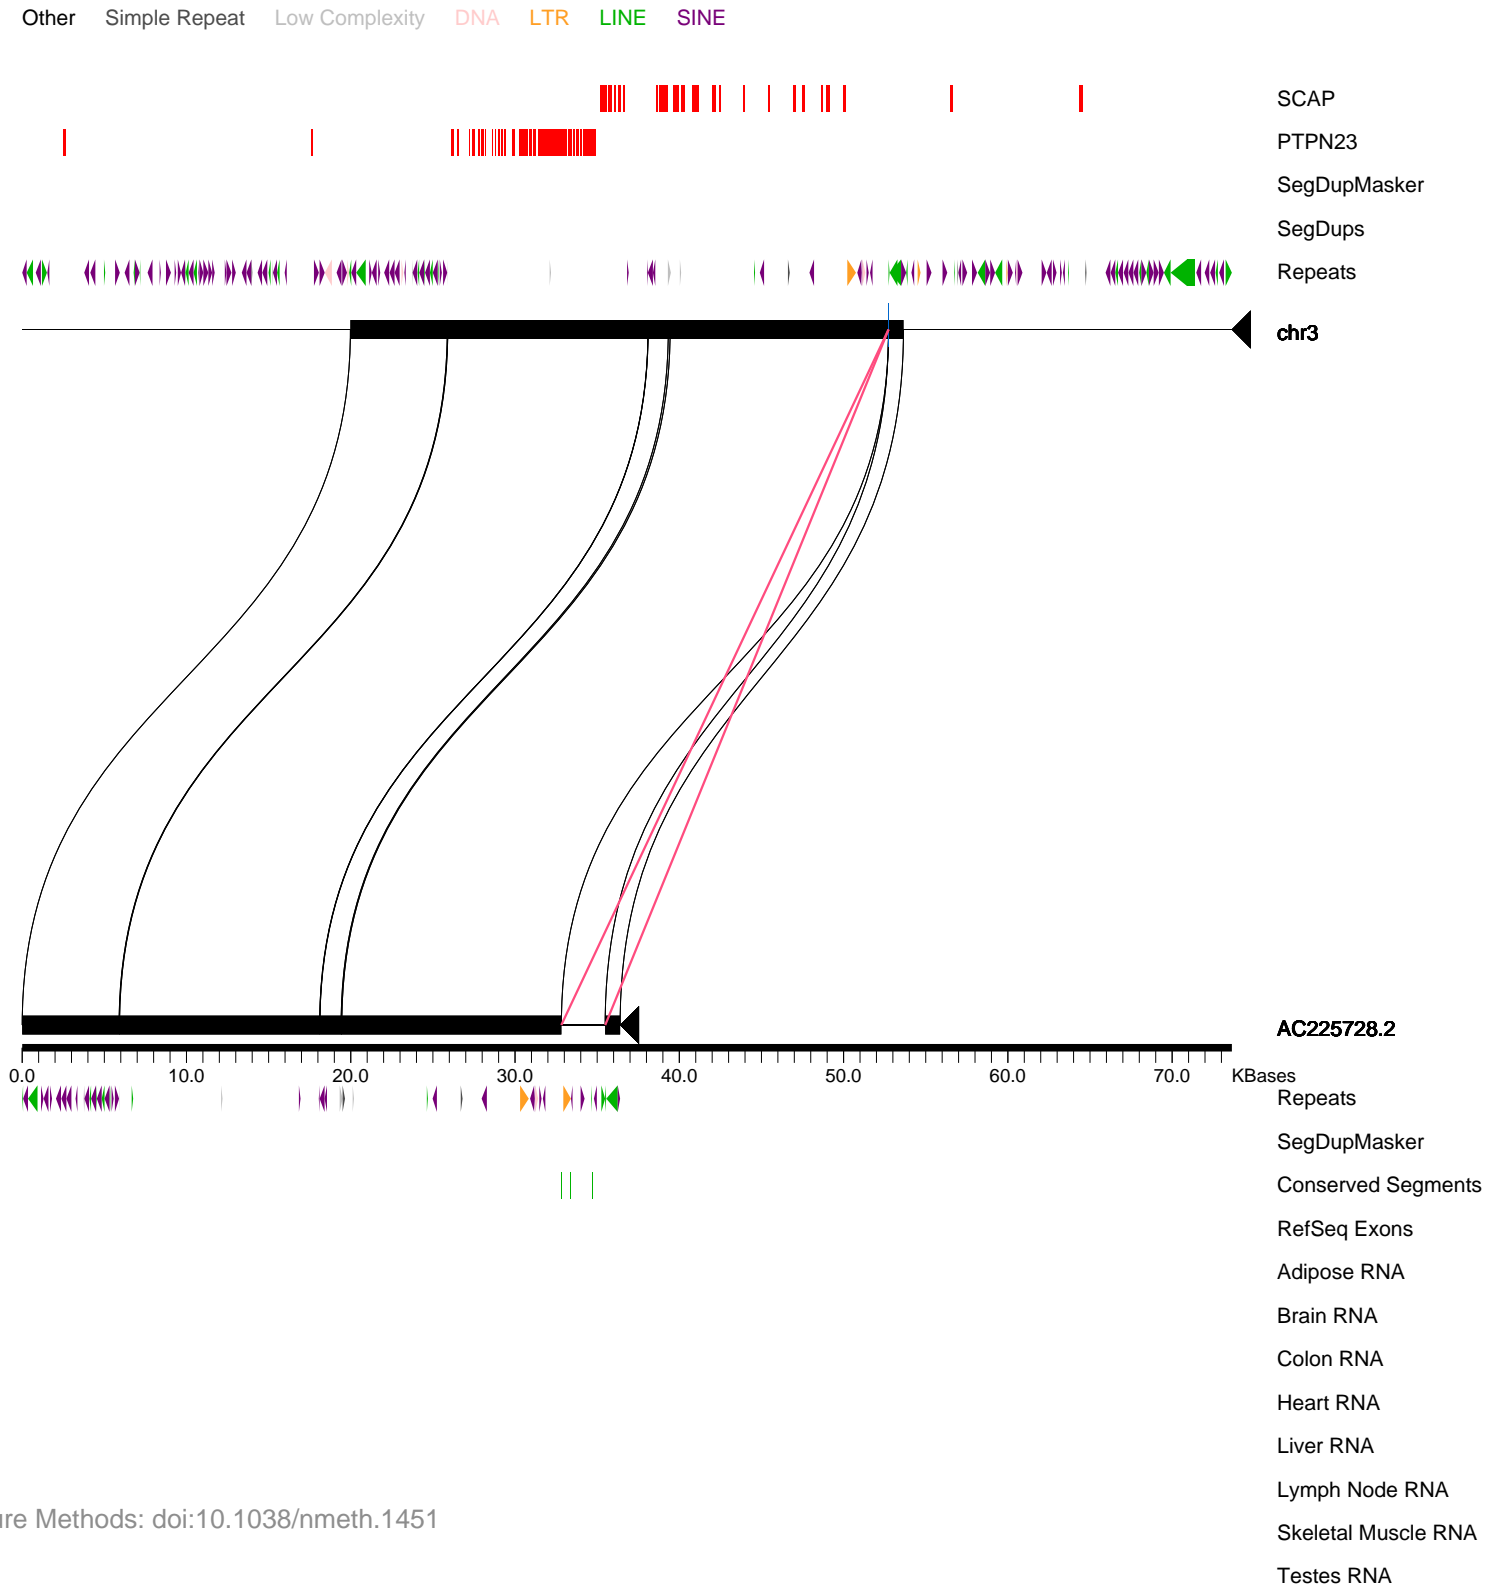

Clone file = AC225768.fa

Insertion Size: 4610

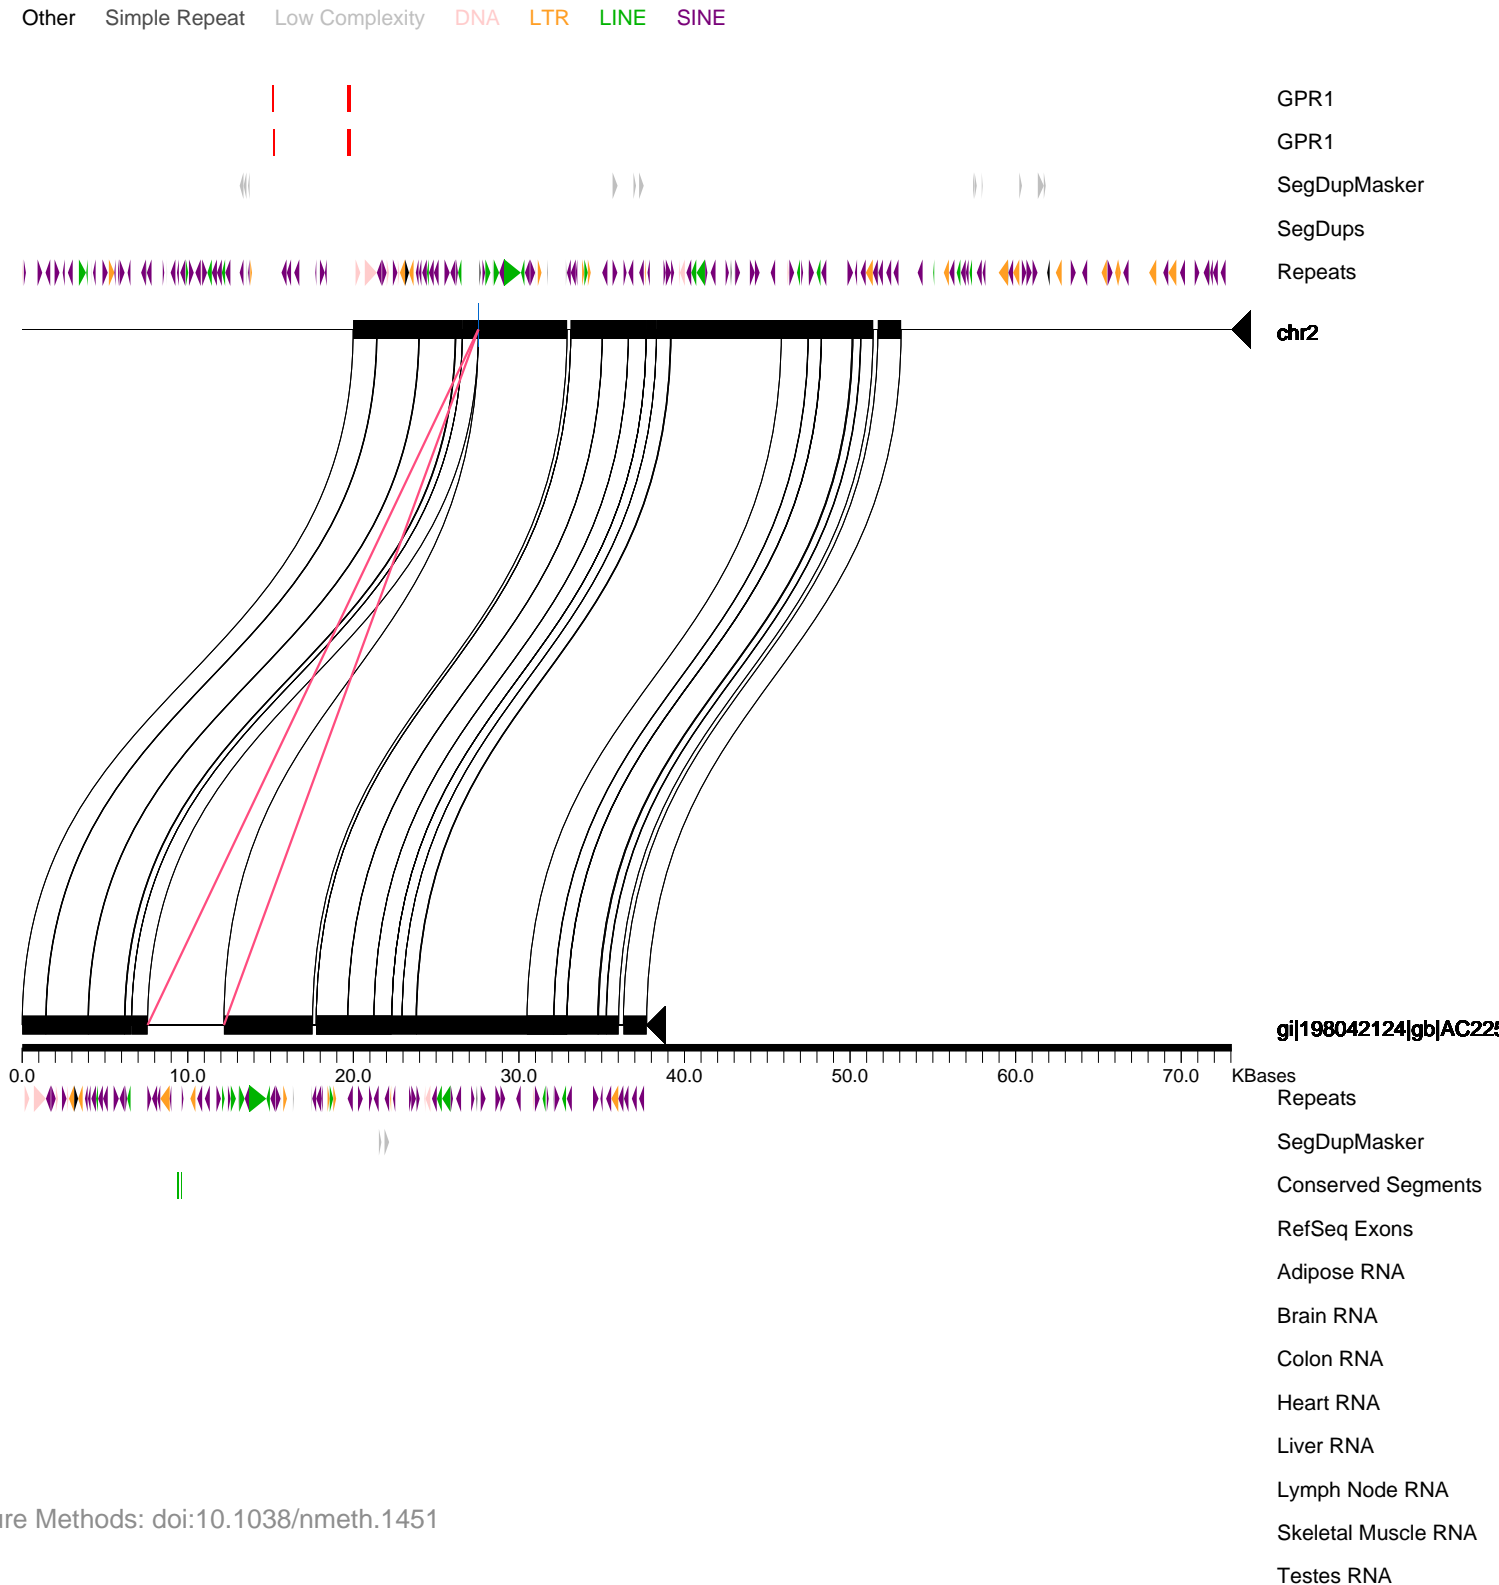

Clone file = AC225822.fa

Insertion Size: 18398

Other Simple Repeat Low Complexity DNA LTR LINE SINE

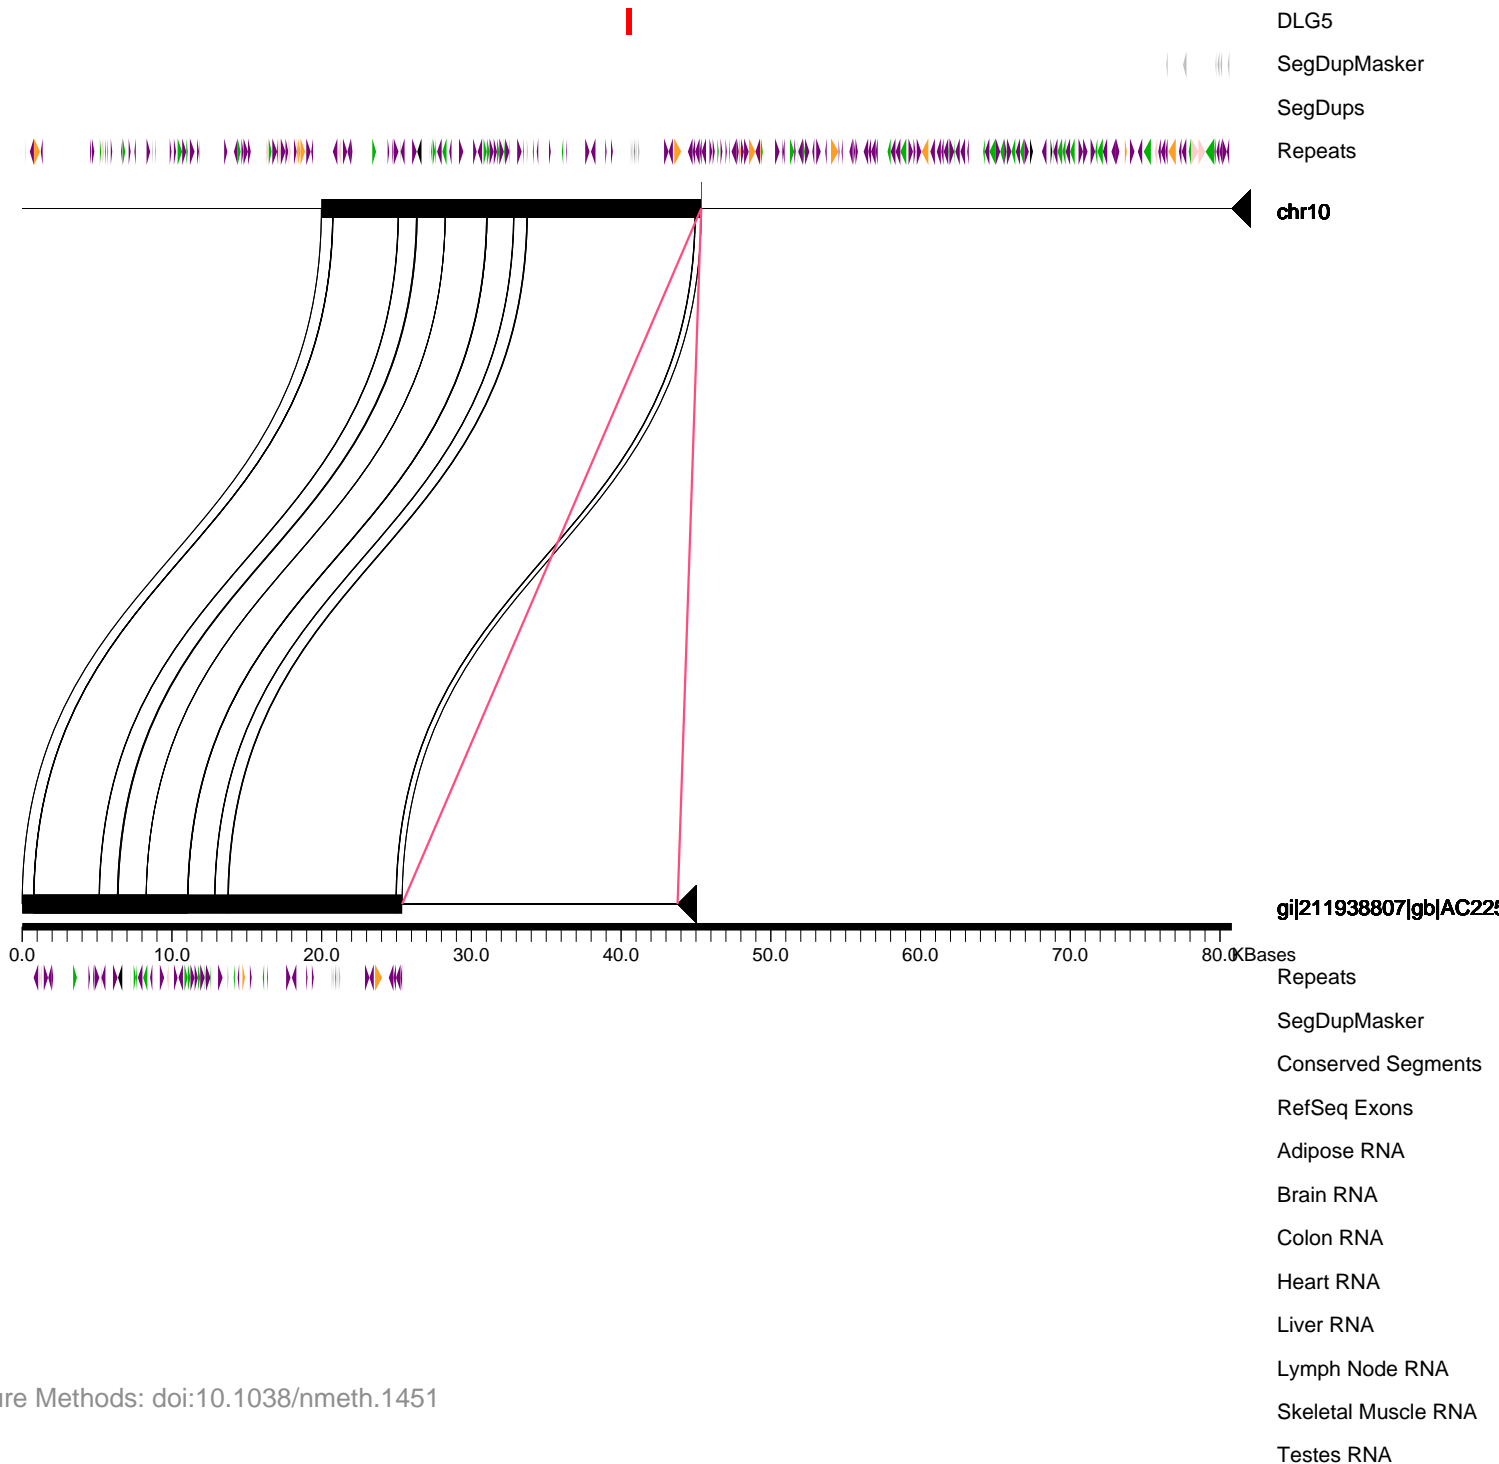

Clone file = AC225829.fa

Insertion Size: 4225

Other Simple Repeat Low Complexity DNA LTR LINE SINE

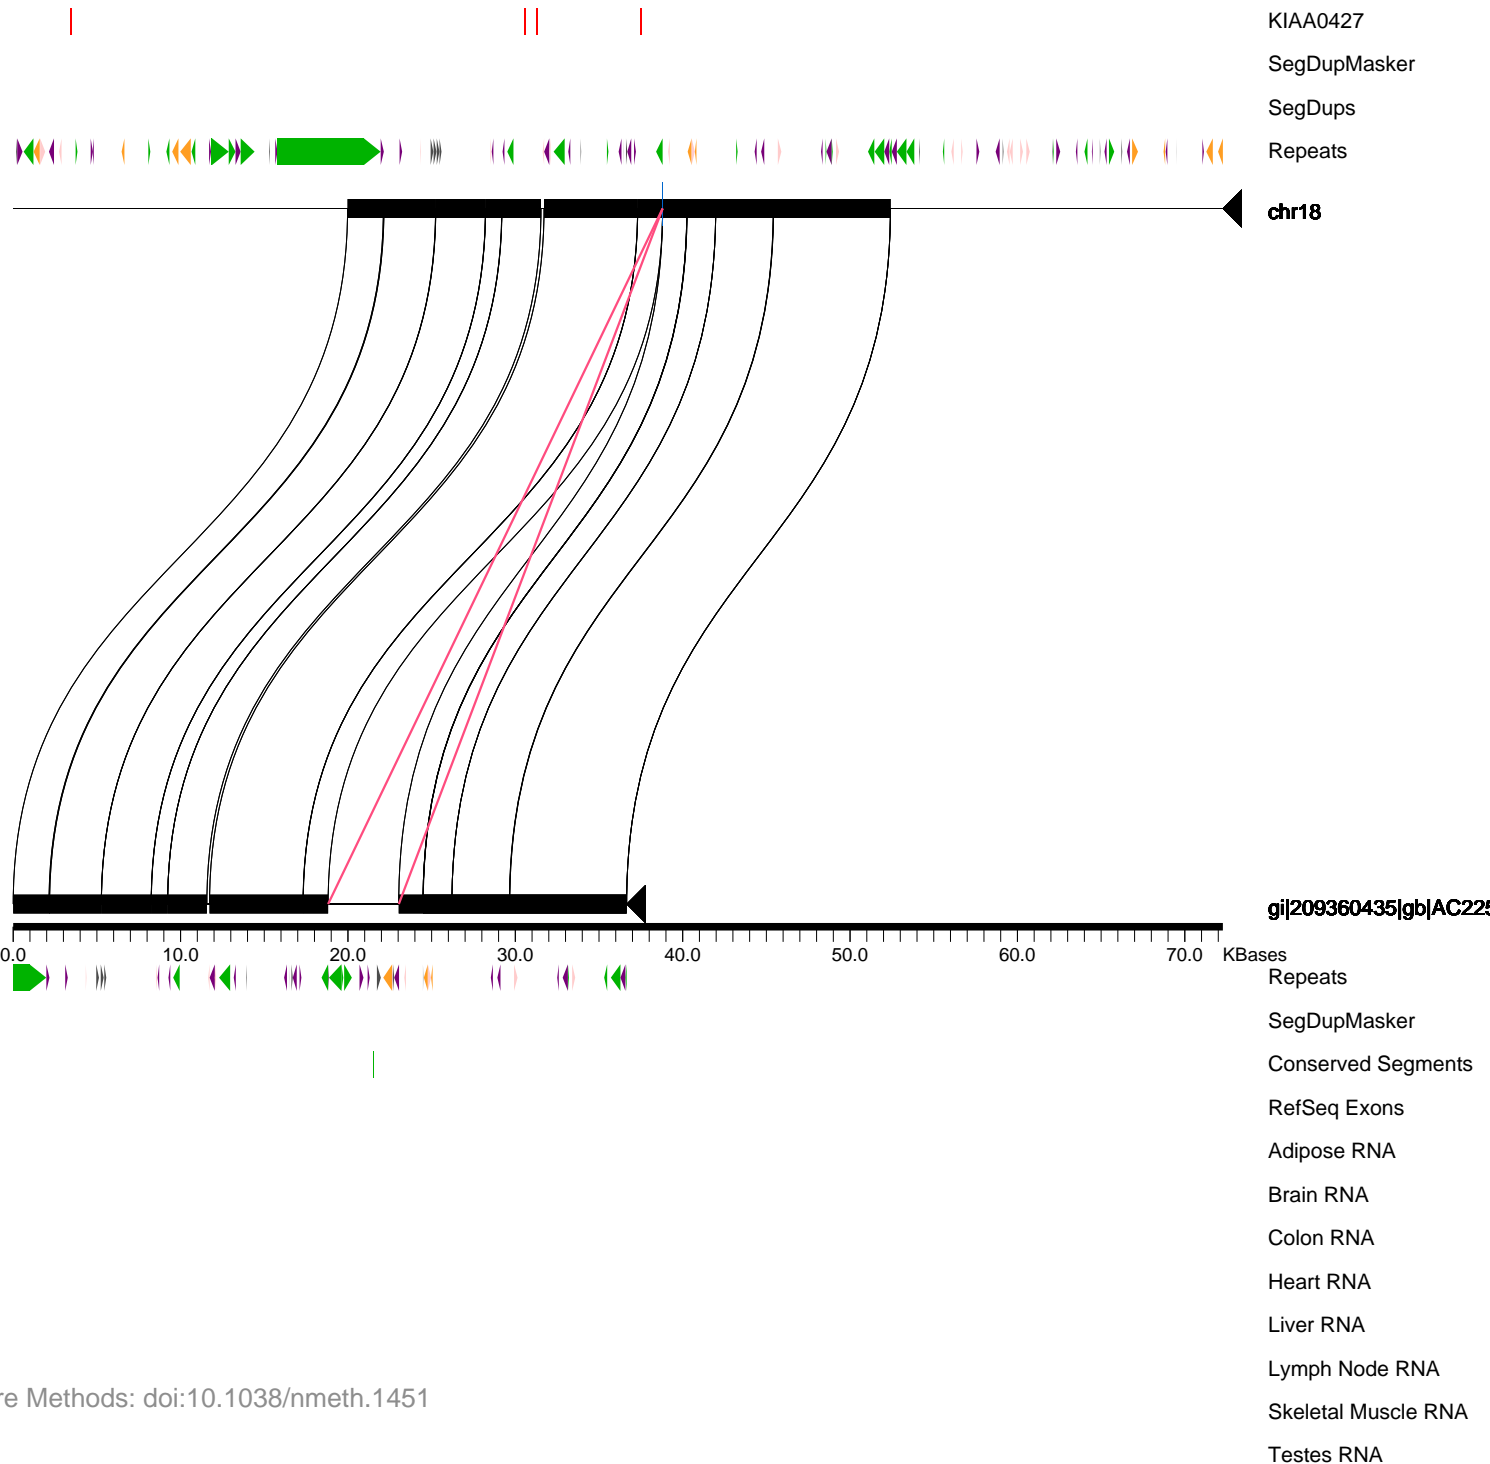



Clone file = AC225889.fa

Insertion Size: 21777

Other Simple Repeat Low Complexity DNA LTR LINE SINE

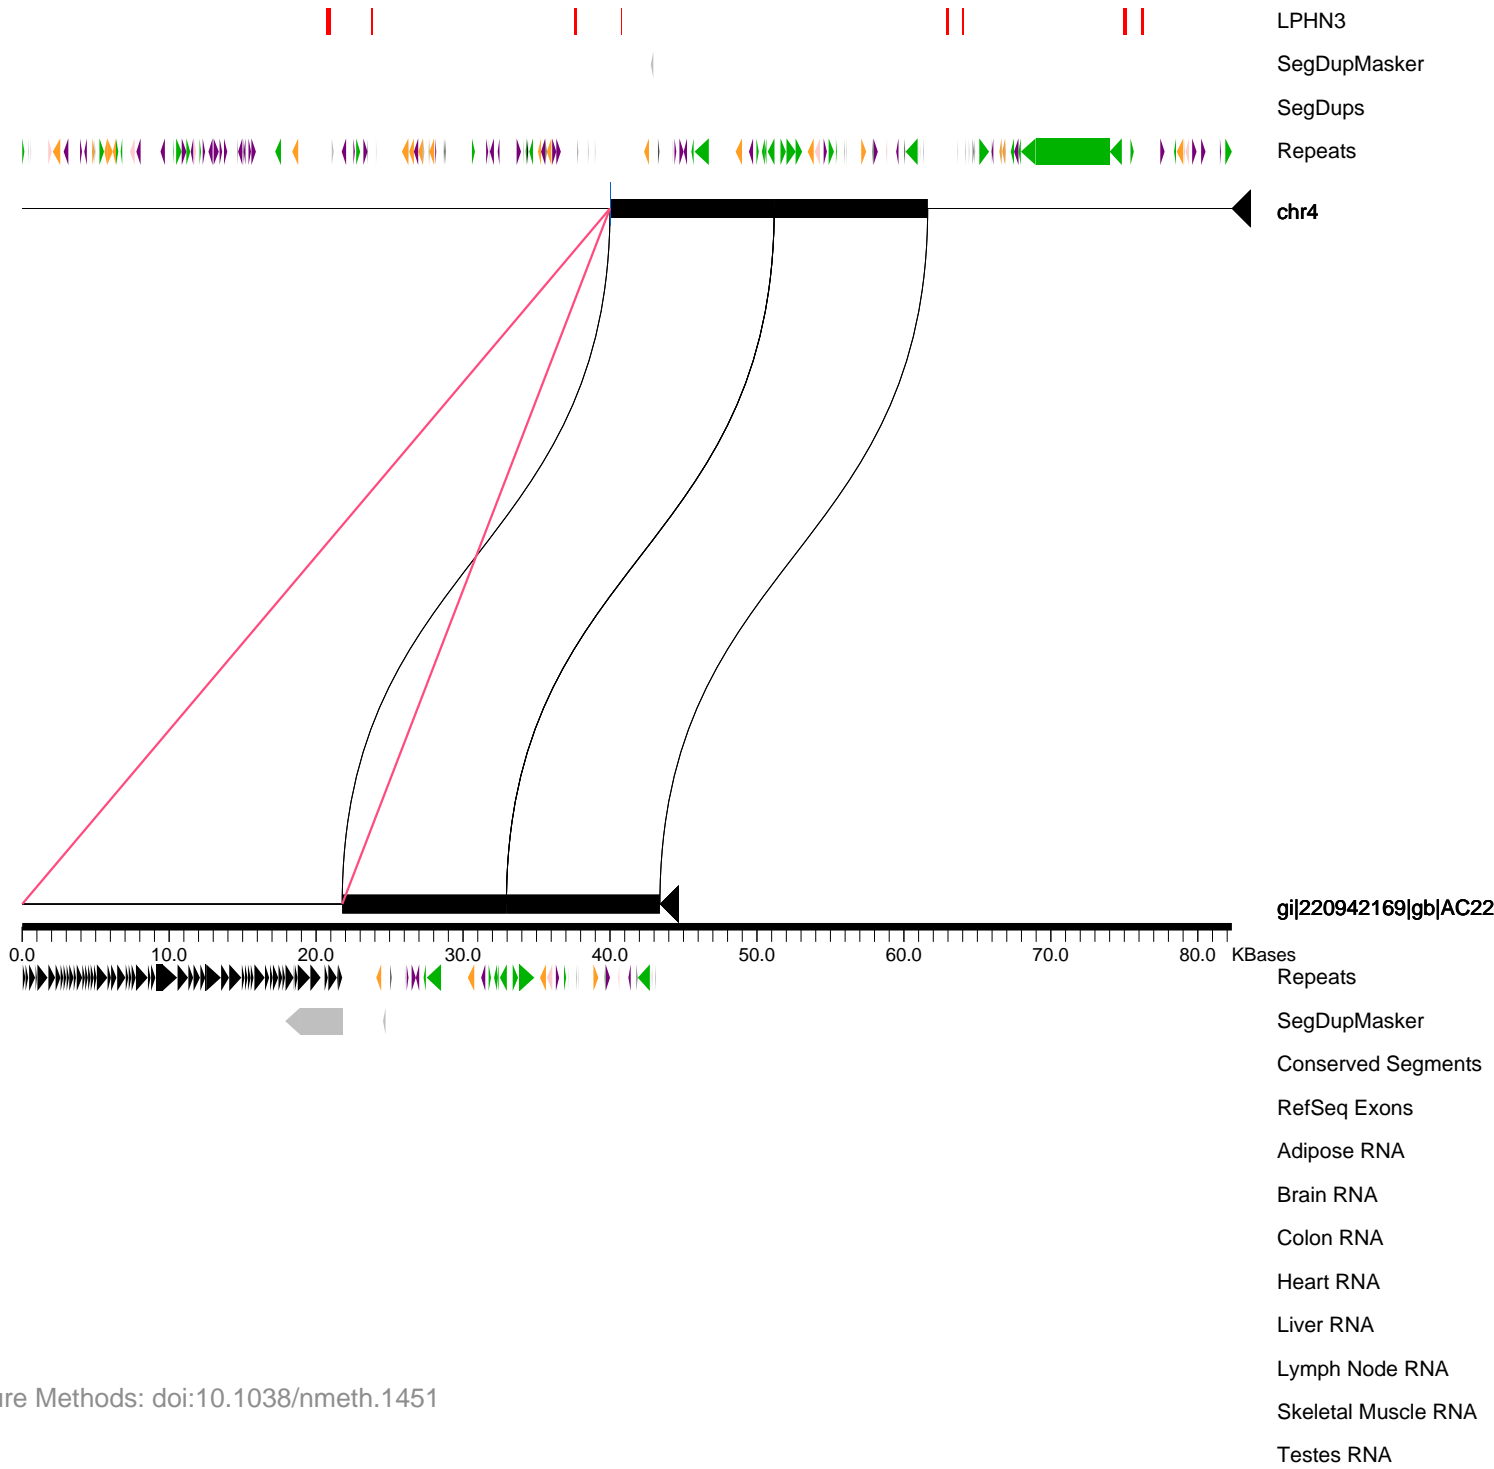

Clone file = AC225984.fa

Insertion Size: 7220

Other Simple Repeat Low Complexity DNA LTR LINE SINE

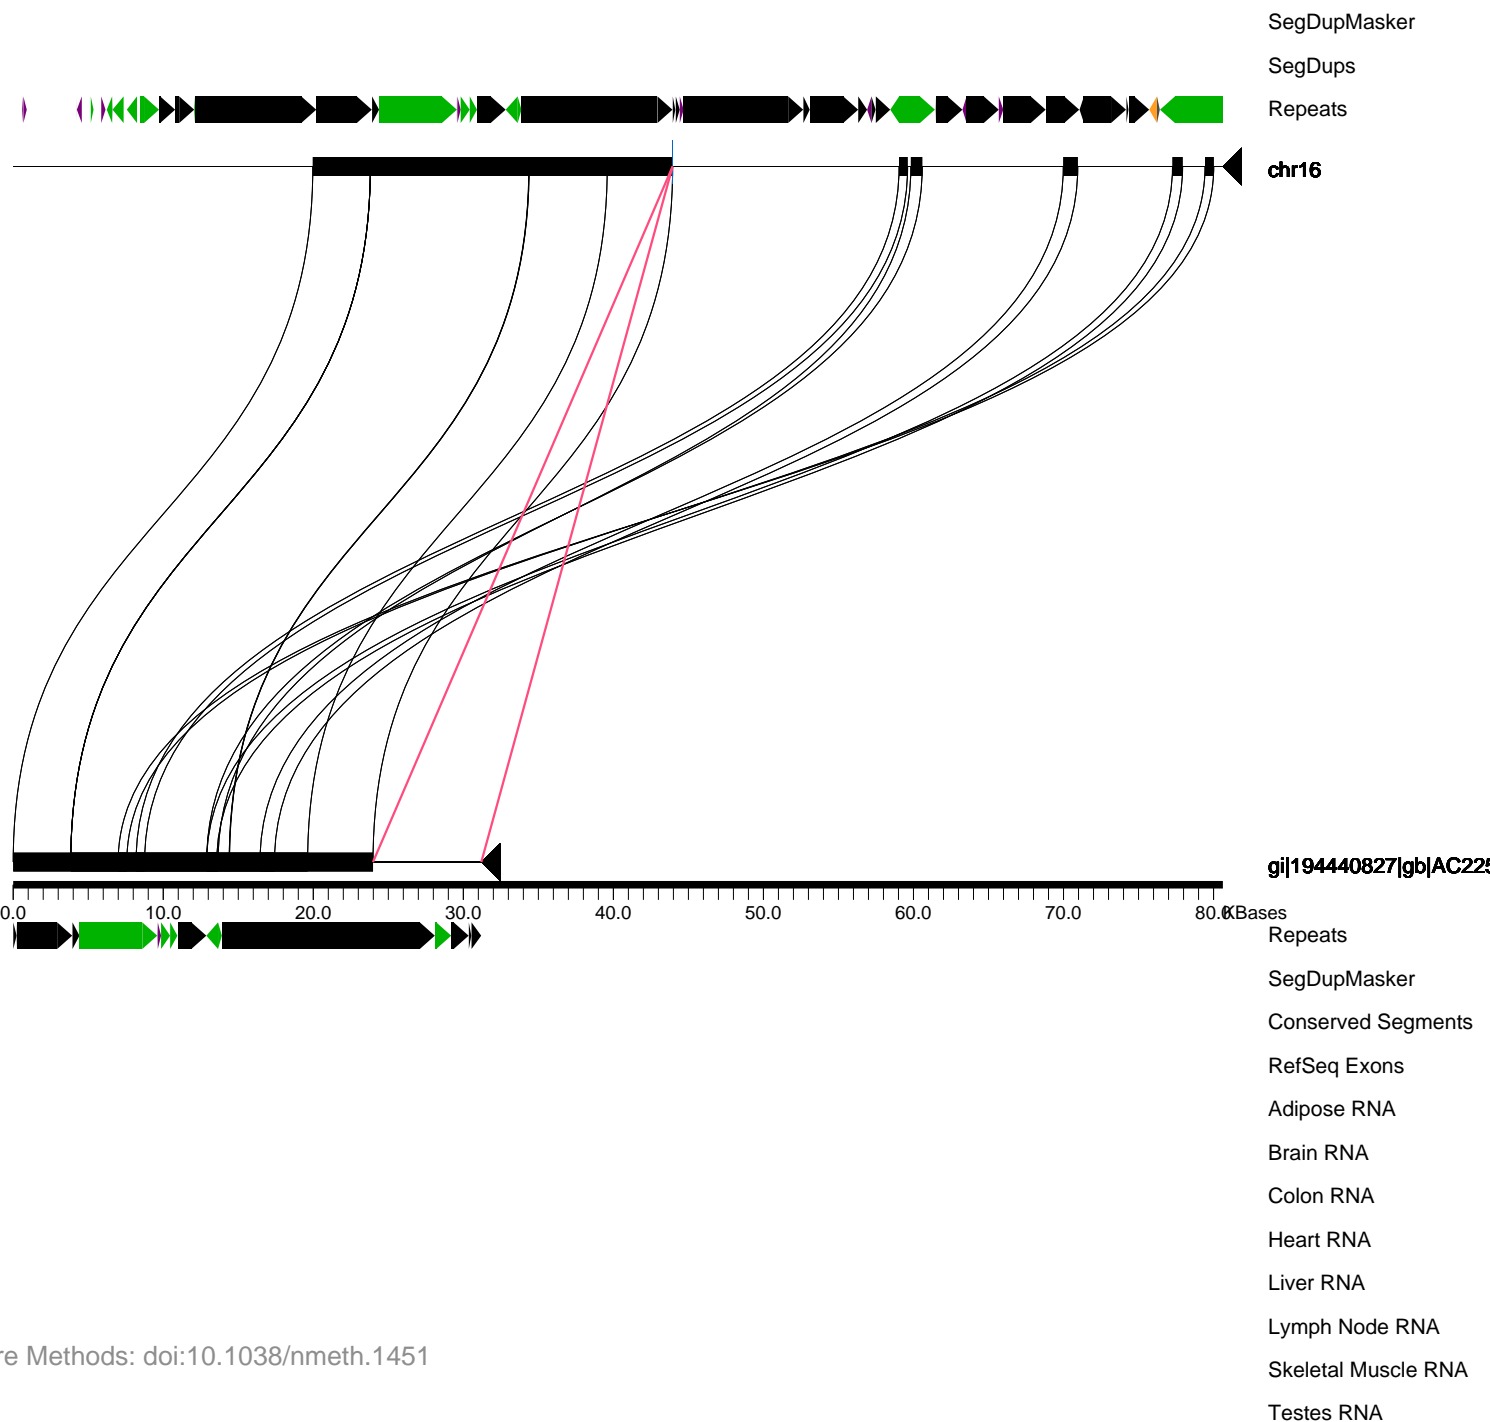

Clone file = AC225989.rc.fa

Insertion Size: 6465

Other Simple Repeat Low Complexity DNA LTR LINE SINE

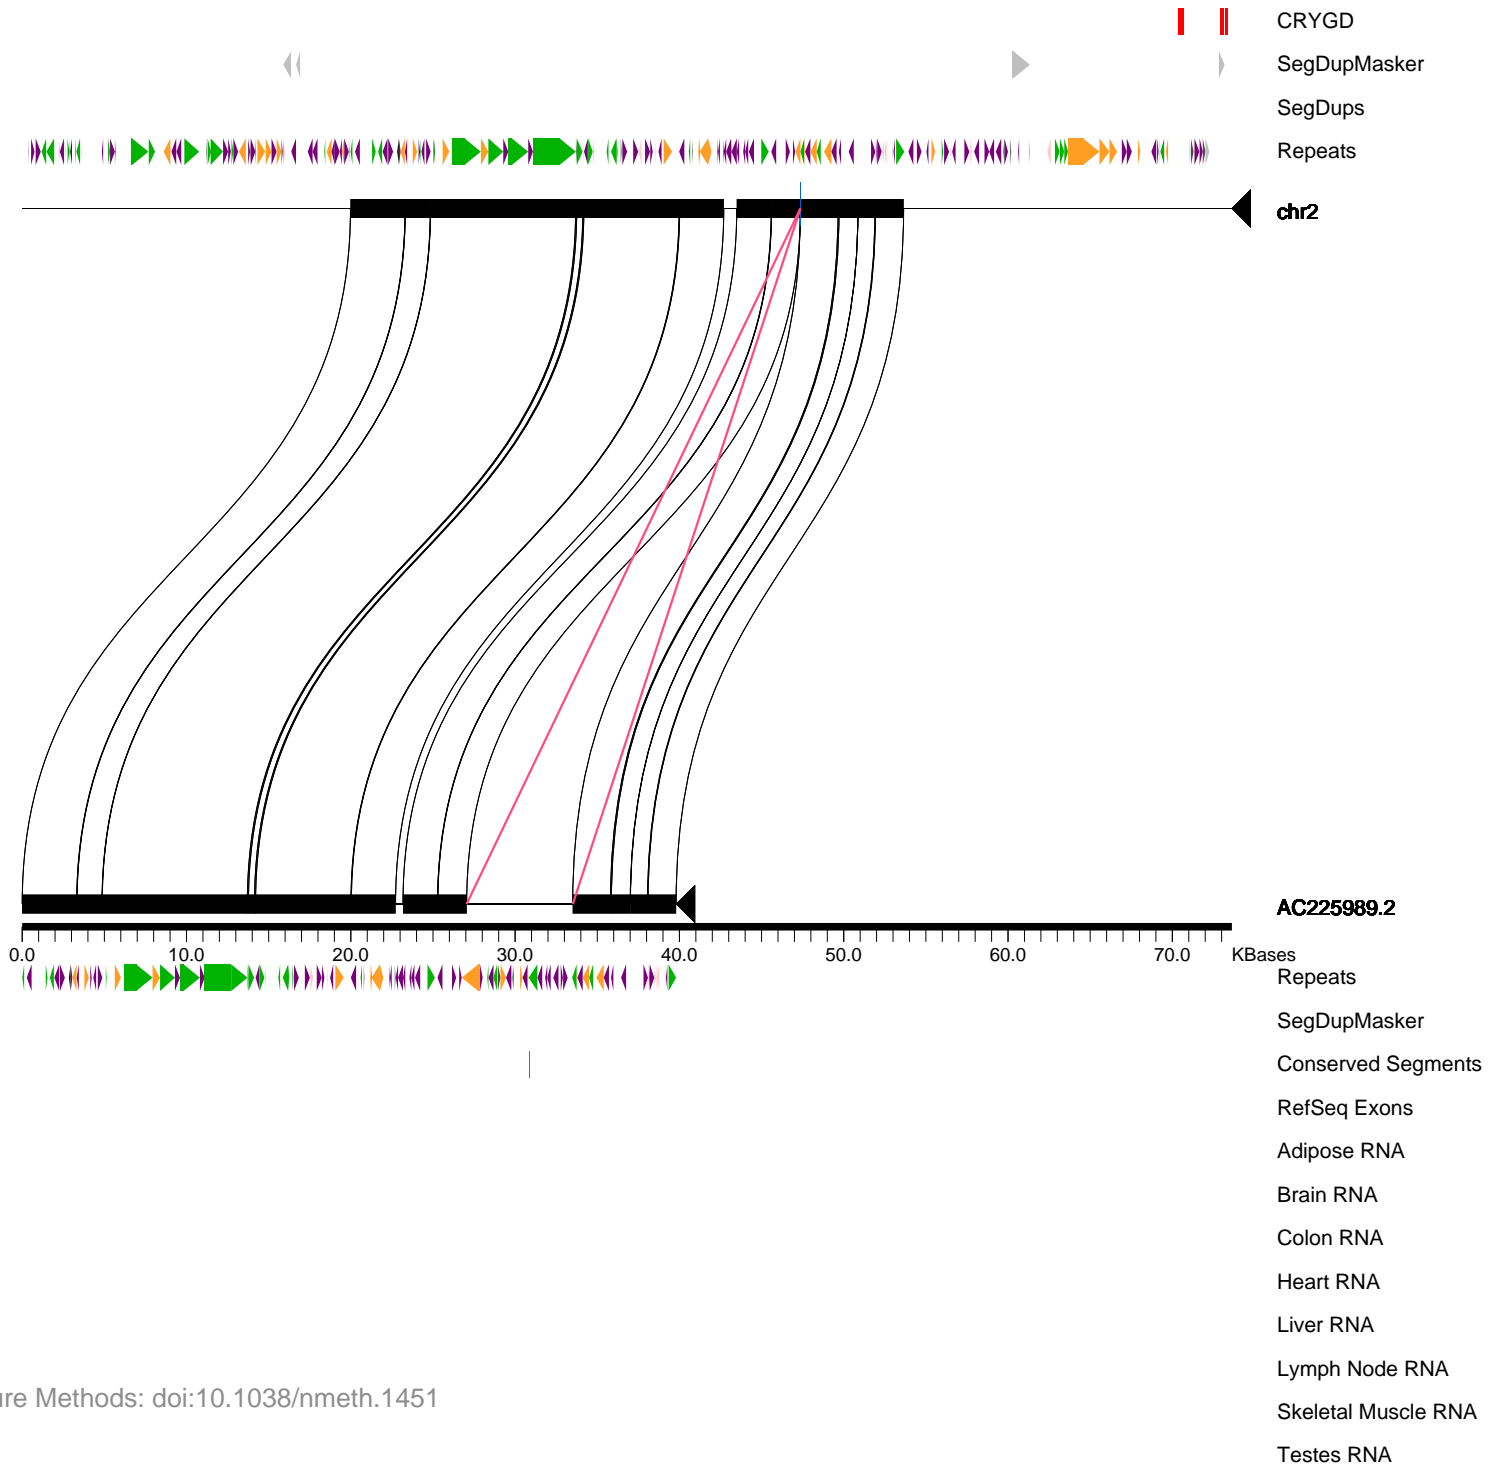

Clone file = AC226007.rc.fa

Insertion Size: 7338

Other Simple Repeat Low Complexity DNA LTR LINE SINE

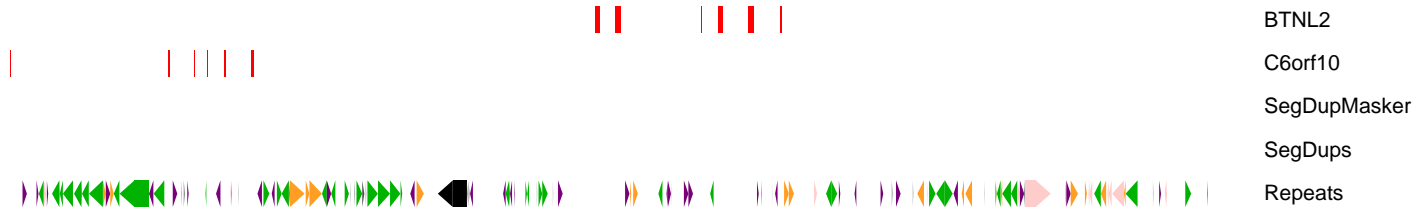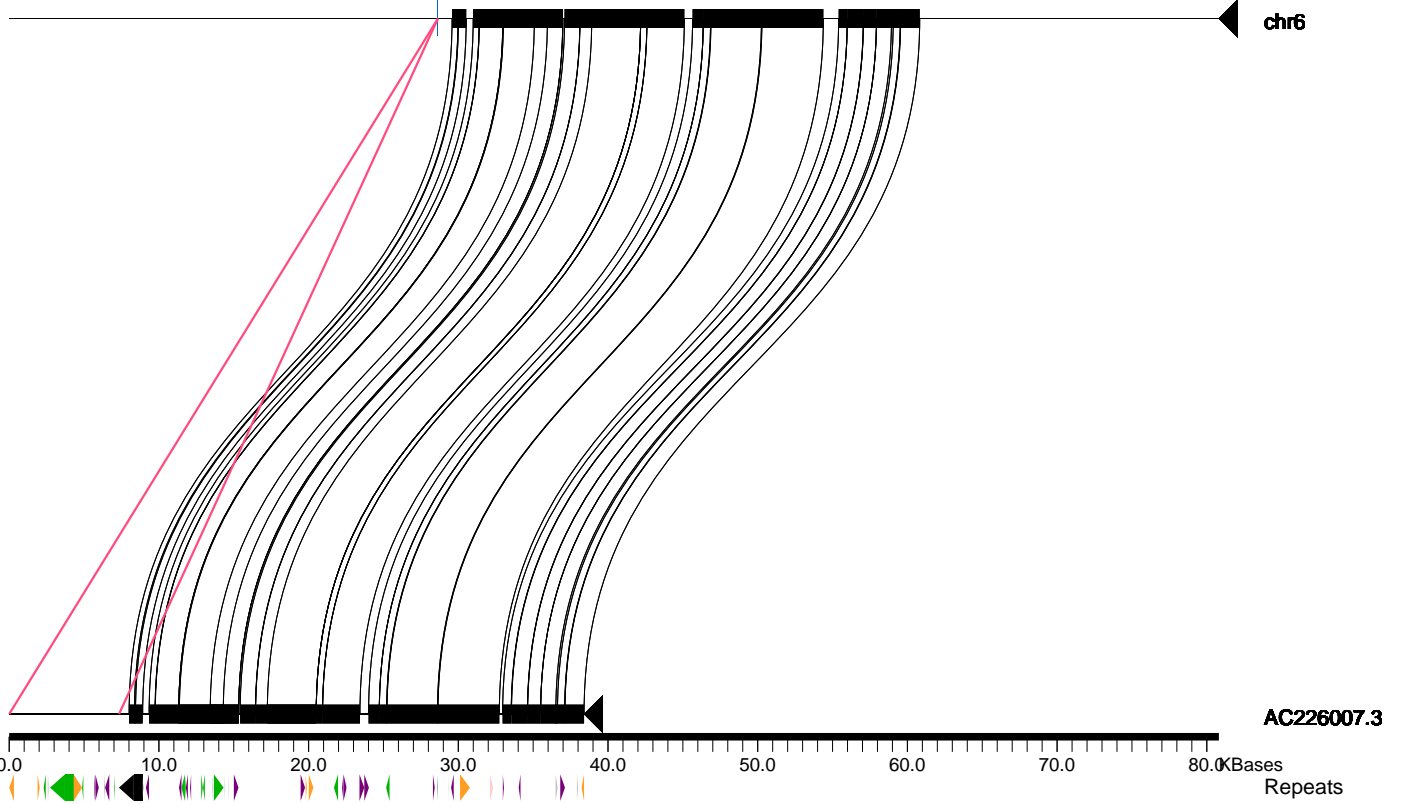

AC226007.3

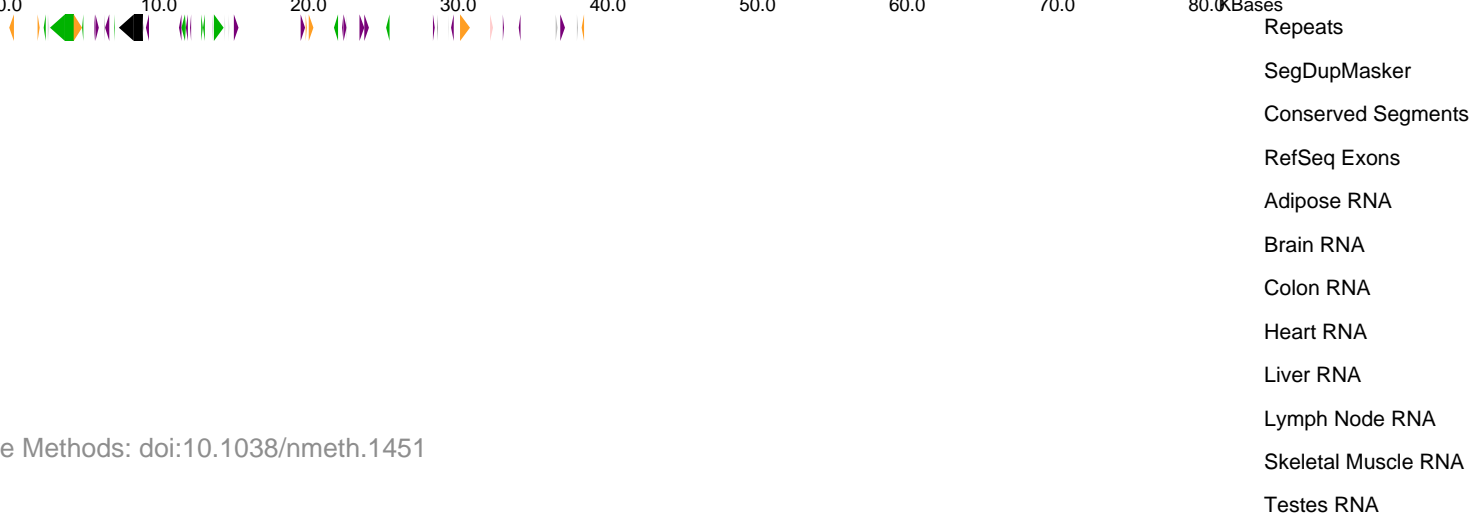

Clone file = AC226108.fa

Insertion Size: 7045

Other Simple Repeat Low Complexity DNA LTR LINE SINE

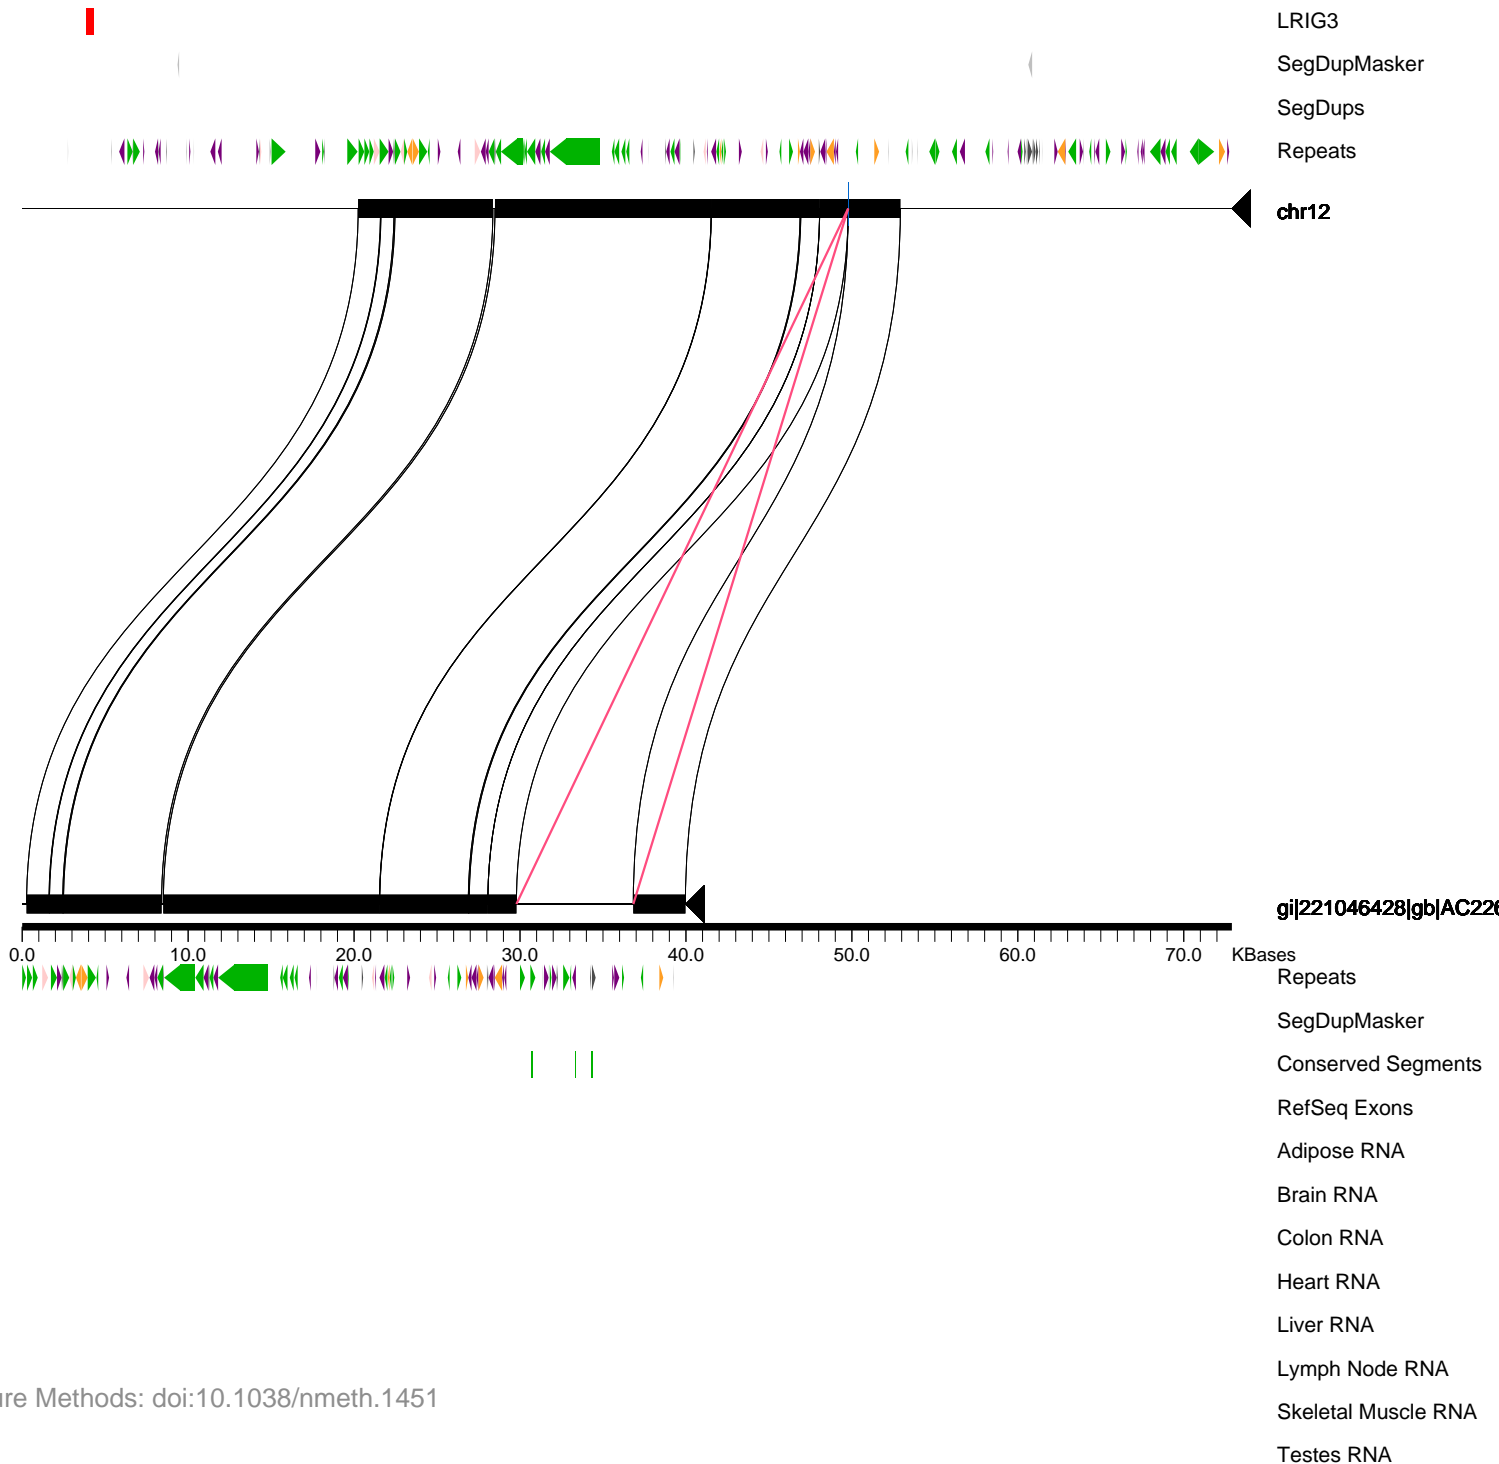

Clone file = AC226116.fa

Insertion Size: 758

Other Simple Repeat Low Complexity DNA LTR LINE SINE

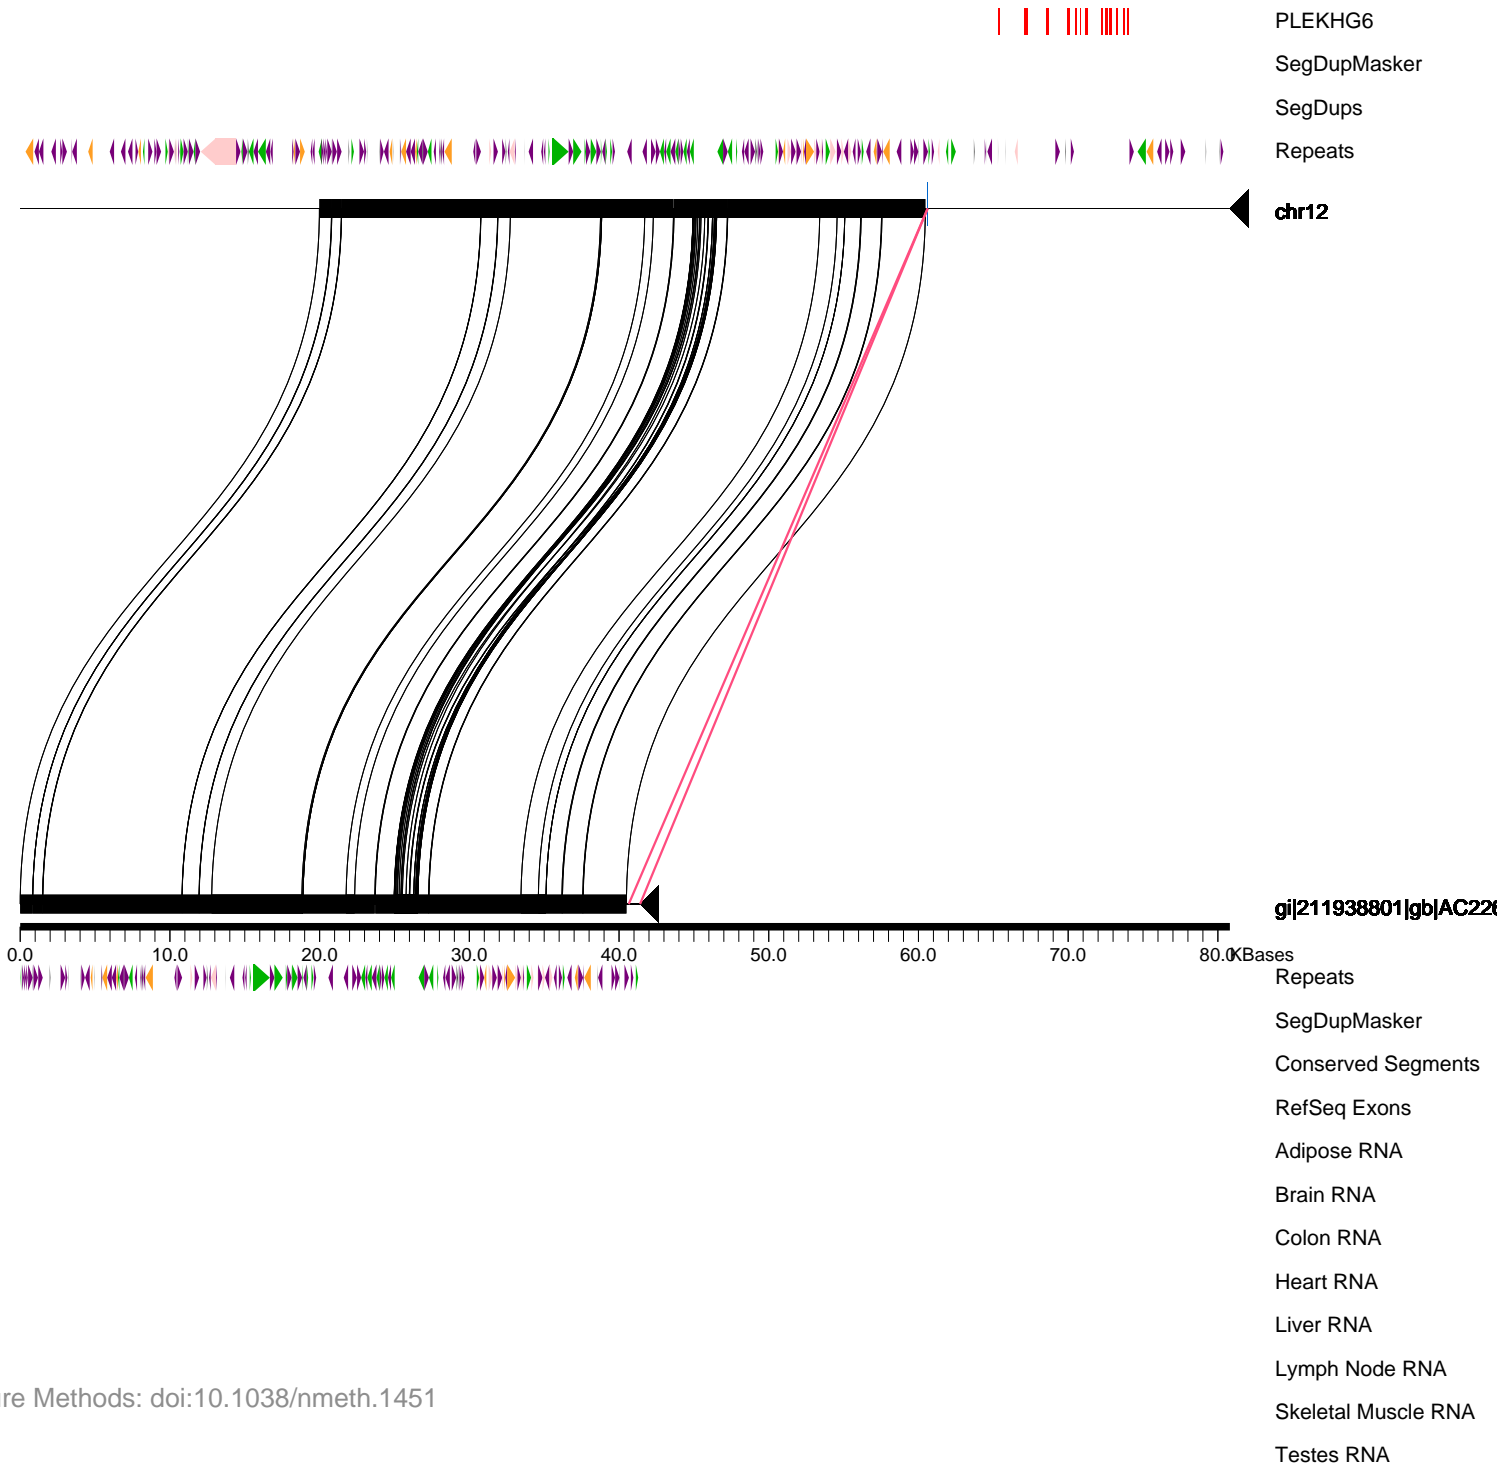

Clone file = AC226139.fa

Insertion Size: 2898

Other Simple Repeat Low Complexity DNA LTR LINE SINE

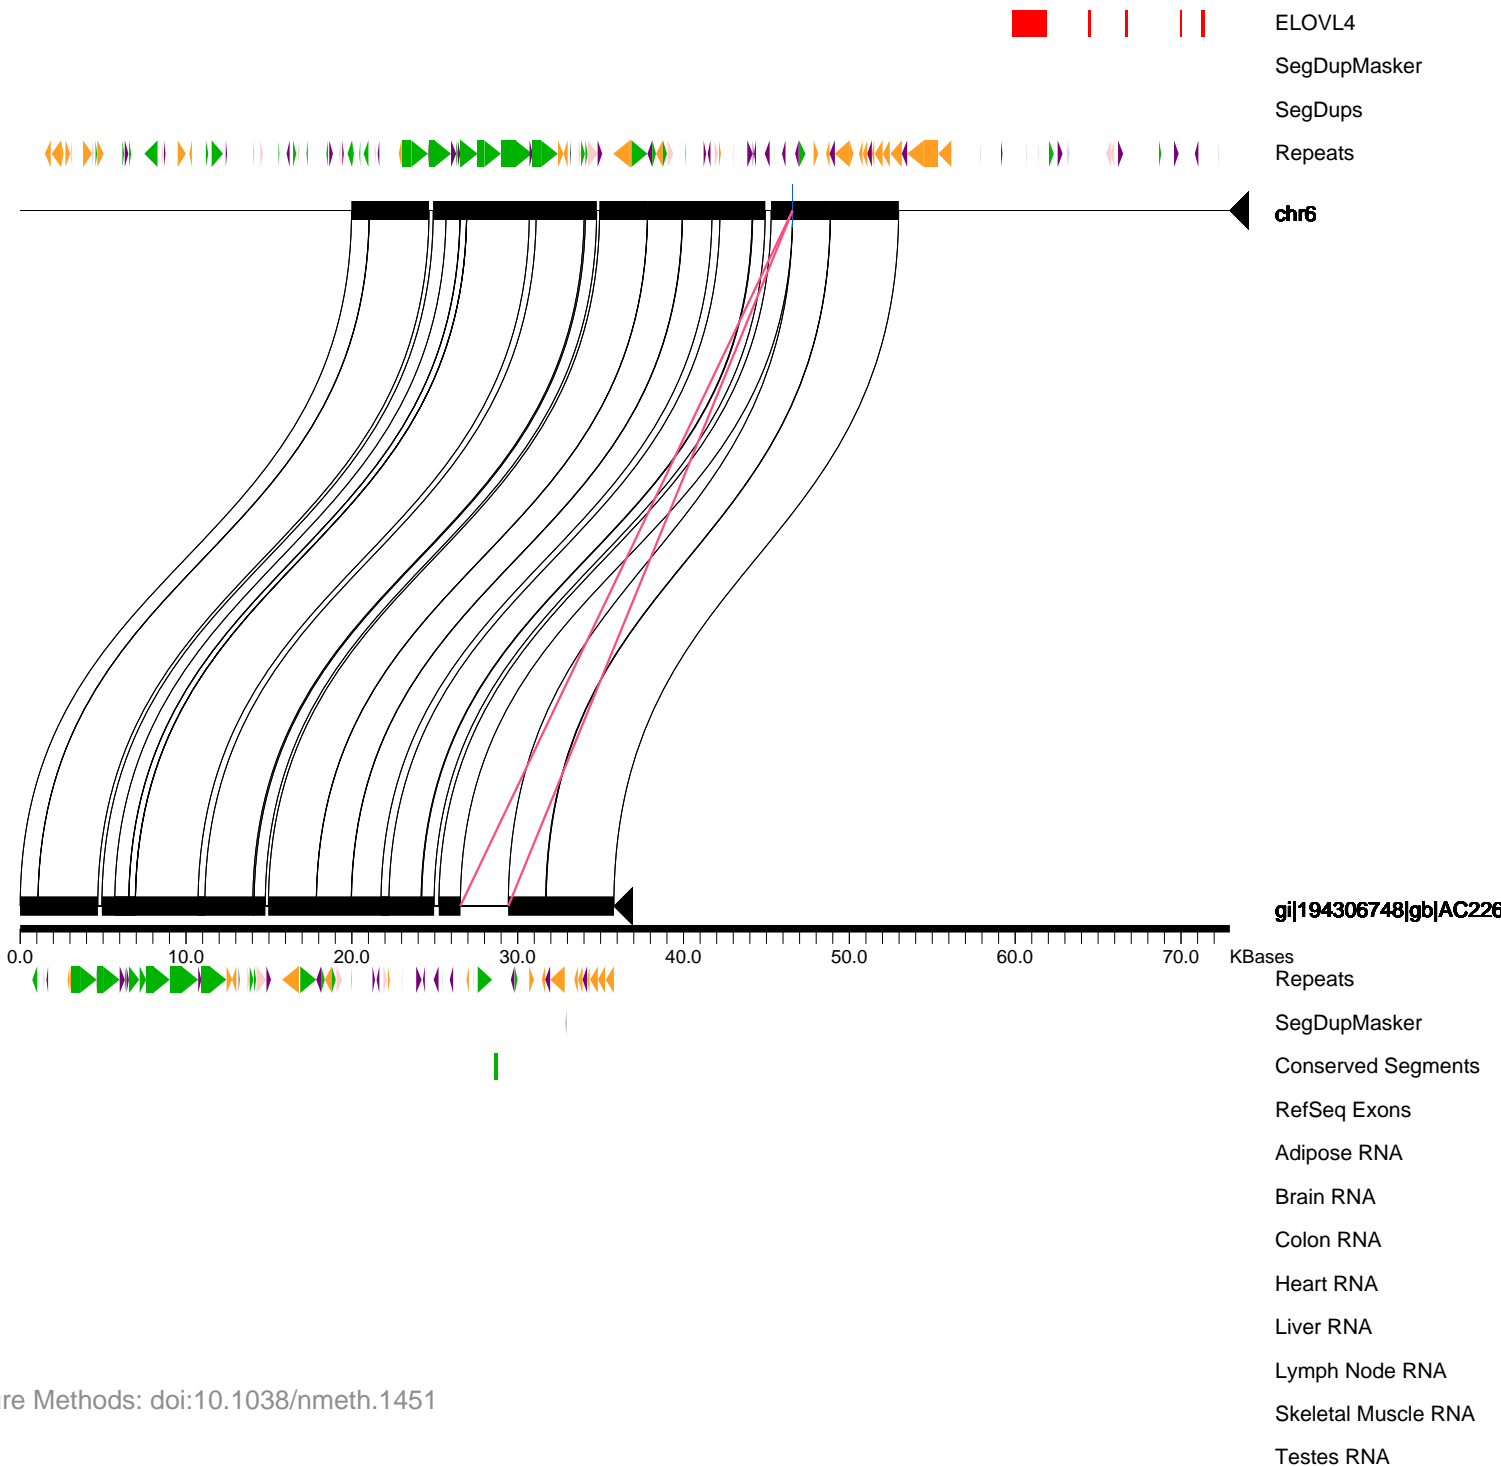

Clone file = AC226140.rc.fa

Insertion Size: 3464

Other Simple Repeat Low Complexity DNA LTR LINE SINE

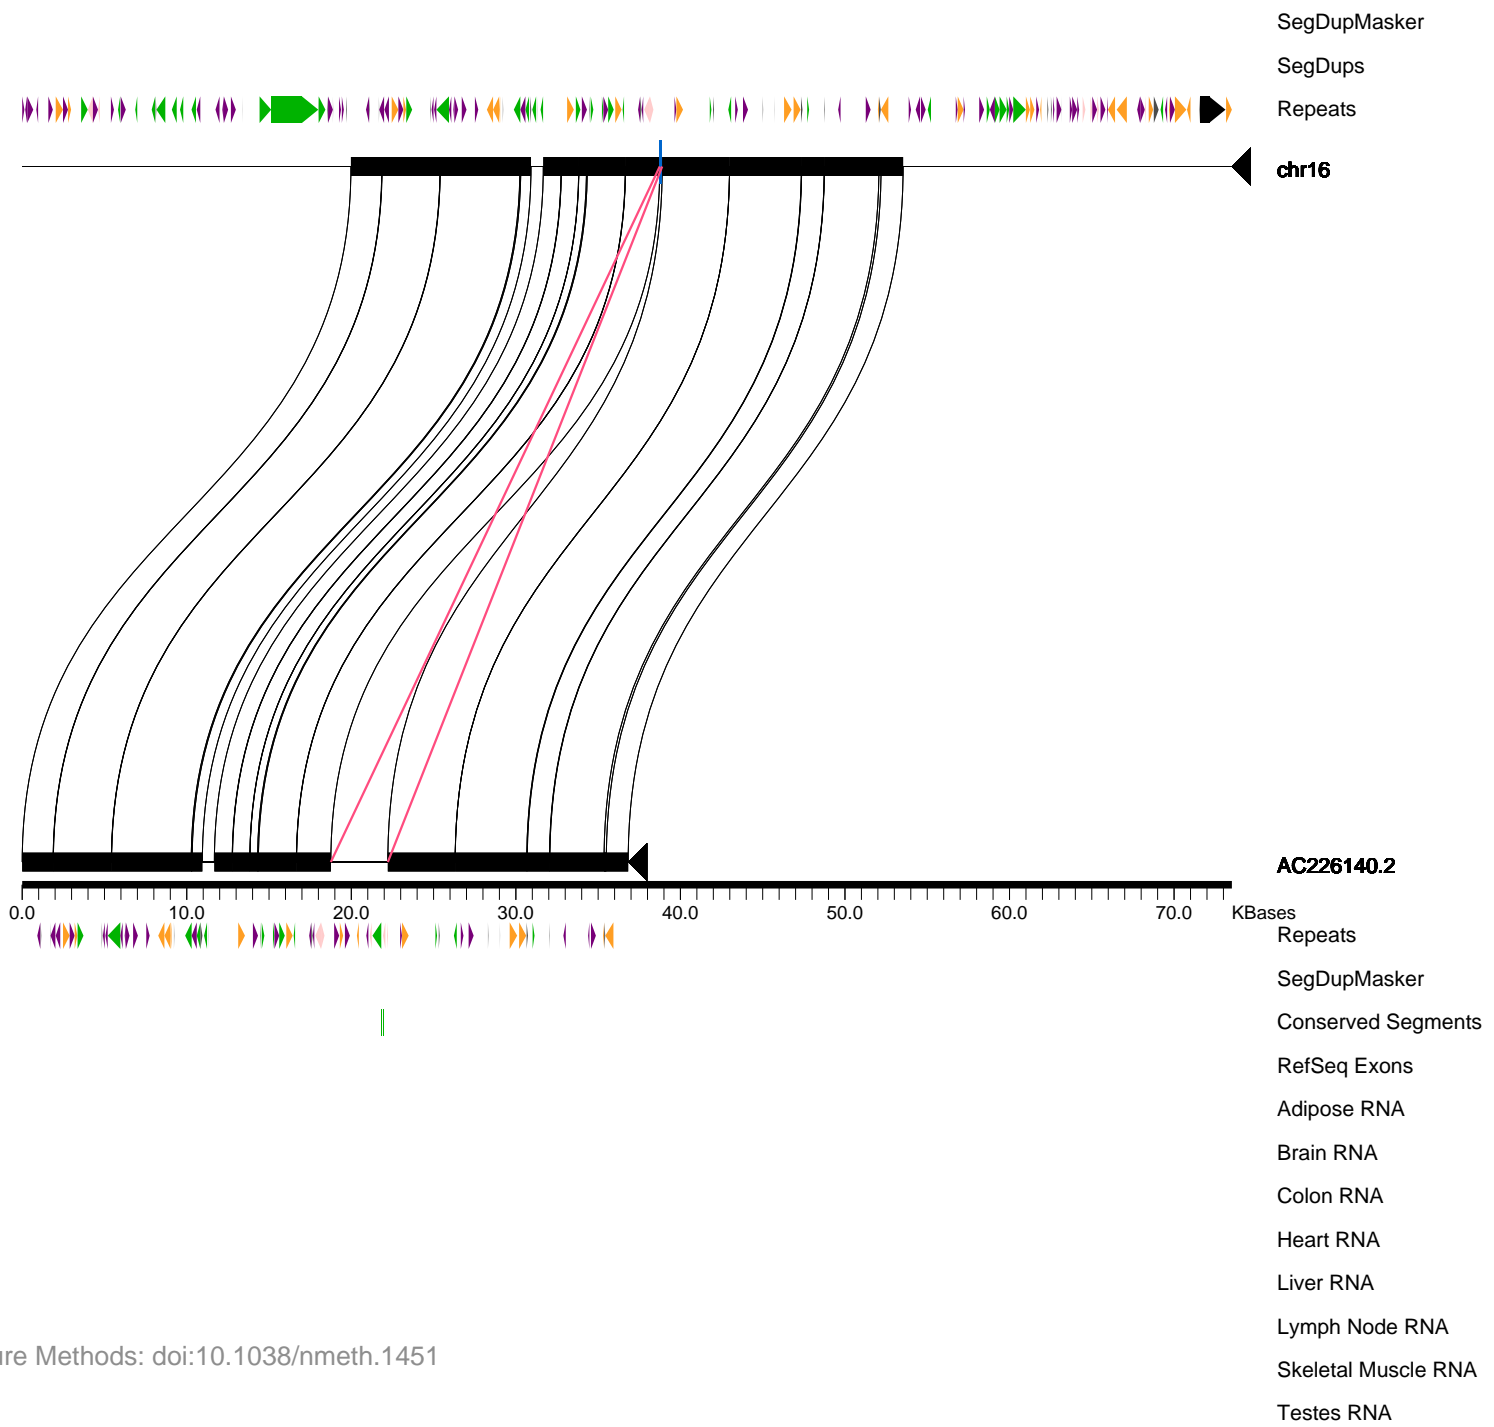



Clone file = AC226143.rc.fa

Insertion Size: 4247

Other Simple Repeat Low Complexity DNA LTR LINE SINE

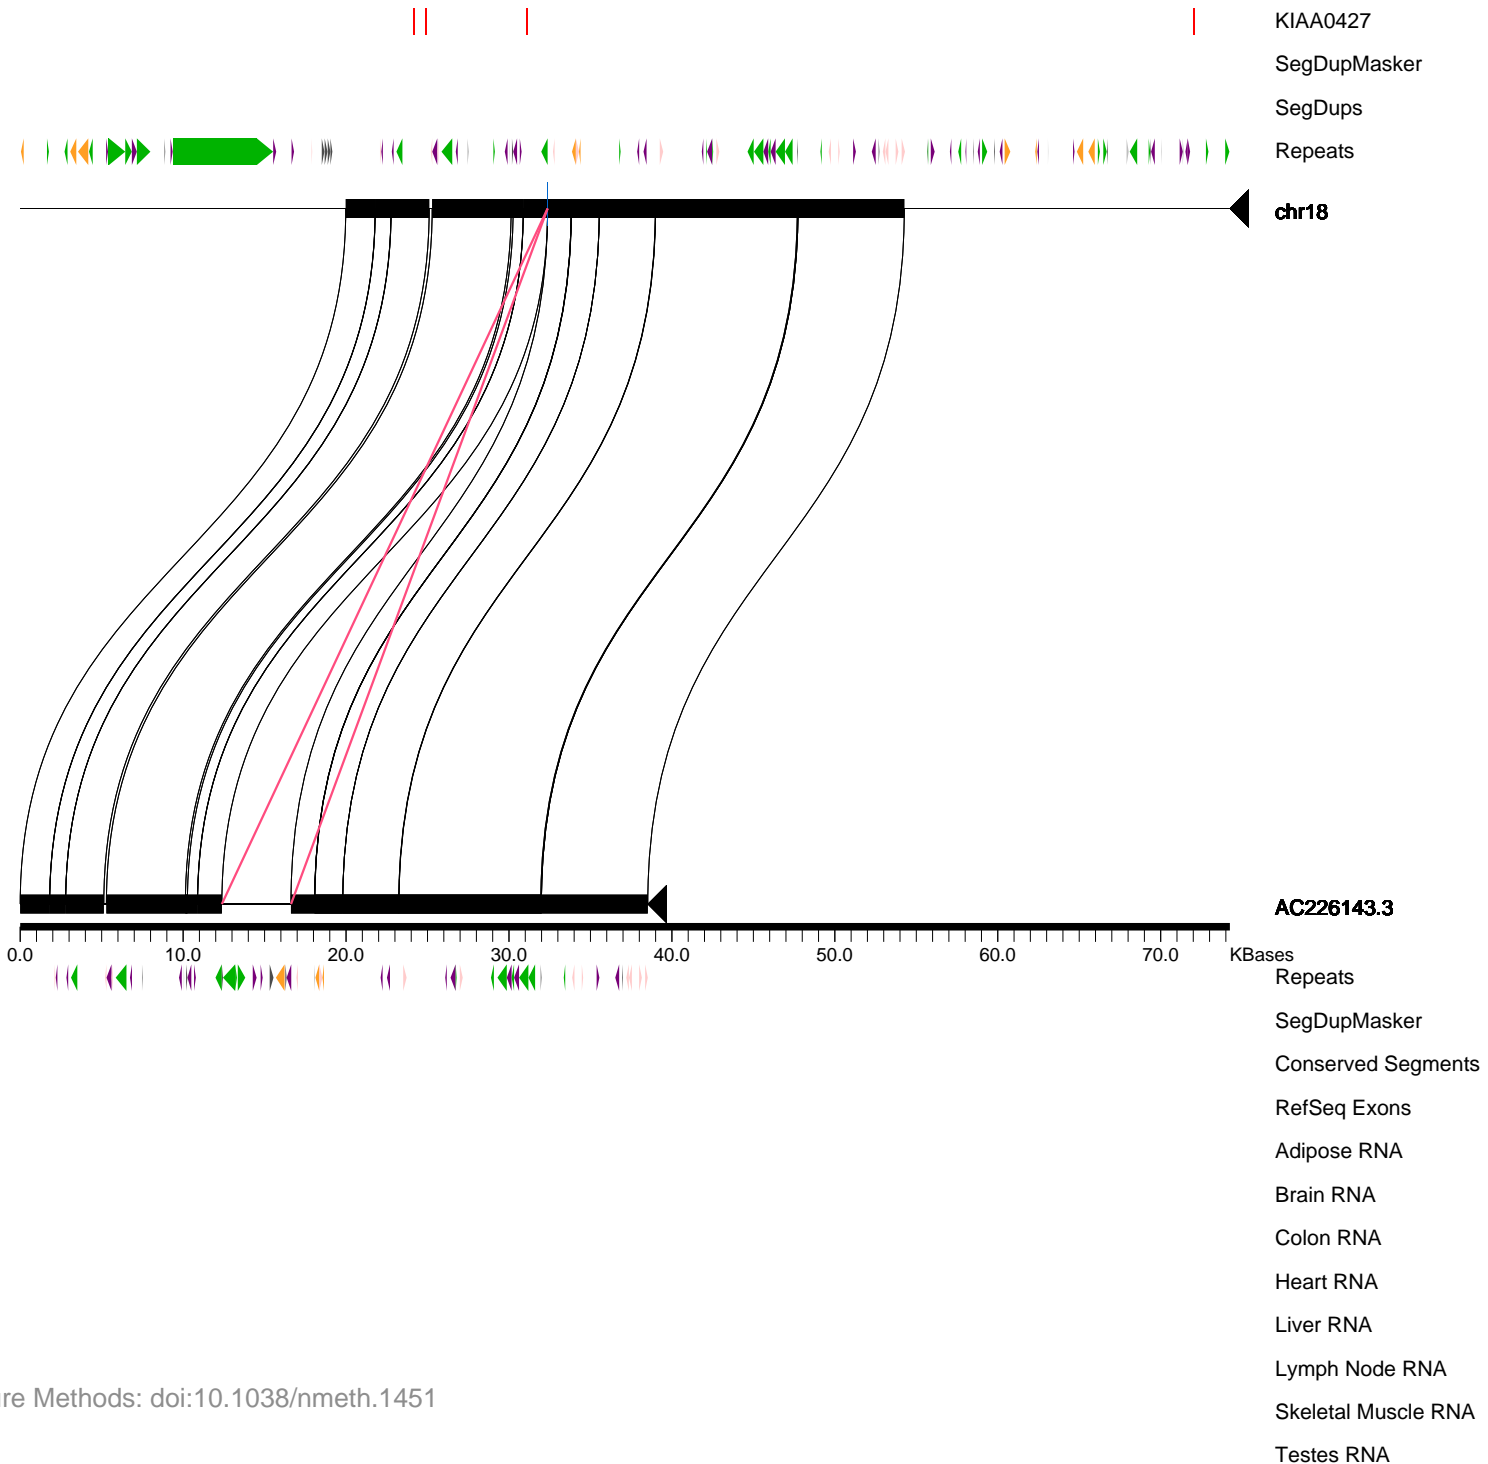

Clone file = AC226171.rc.fa

Insertion Size: 39559

Other Simple Repeat Low Complexity DNA LTR LINE SINE

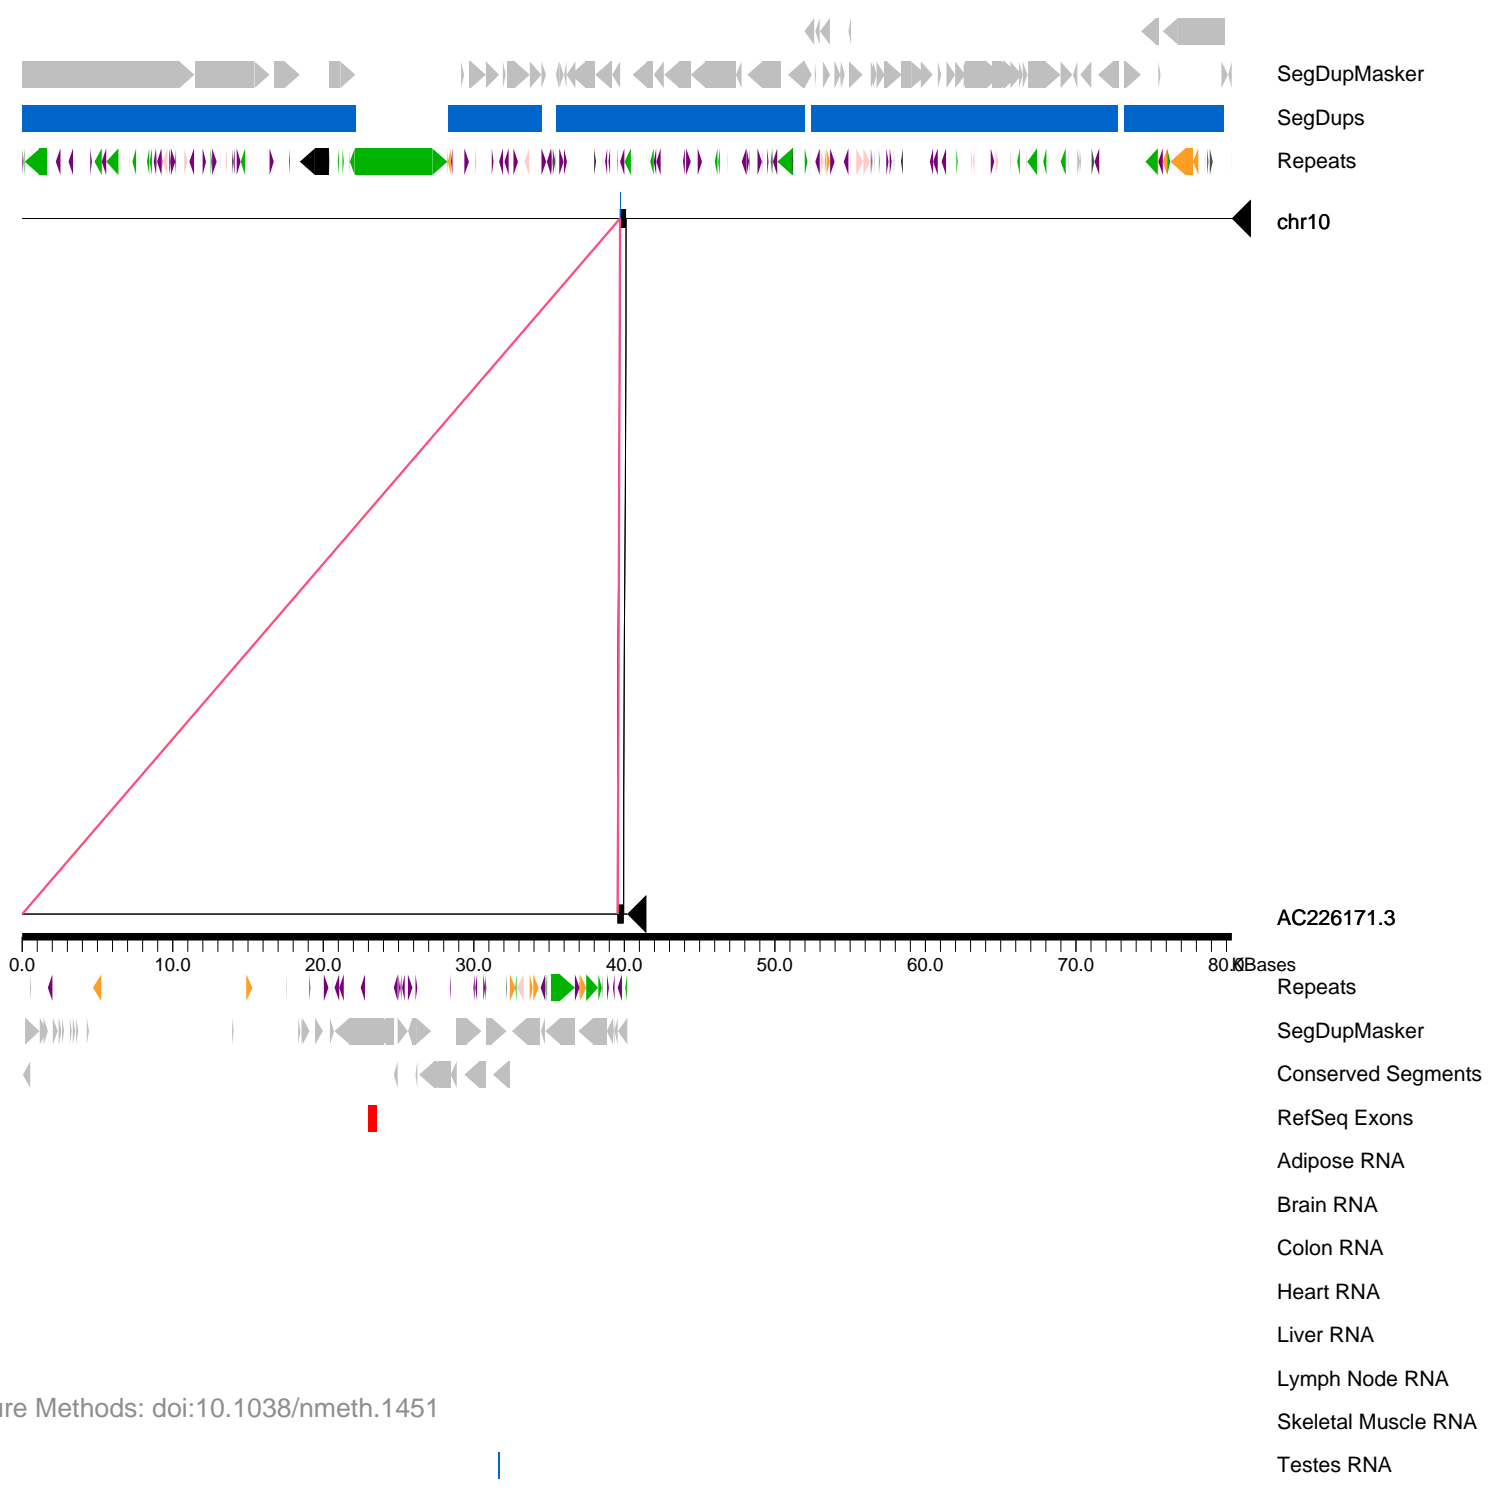

Clone file = AC226495.fa

Insertion Size: 17600

Other Simple Repeat Low Complexity DNA LTR LINE SINE

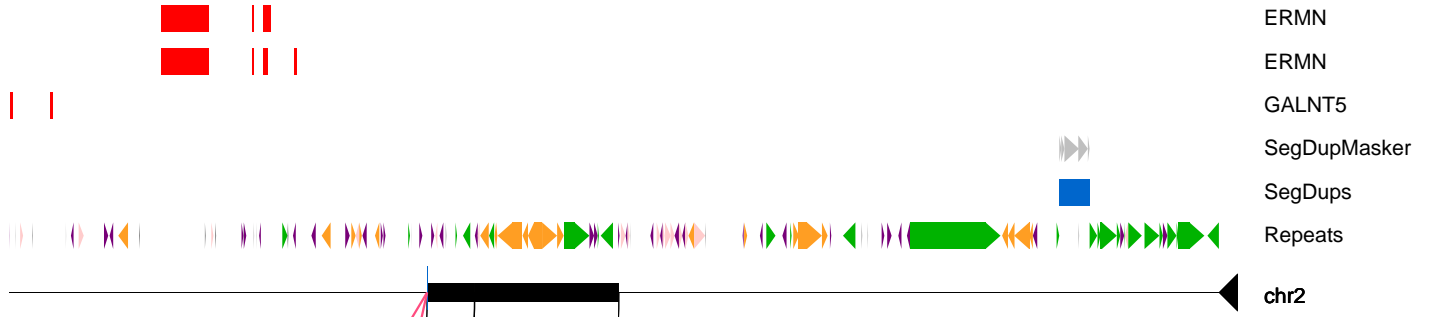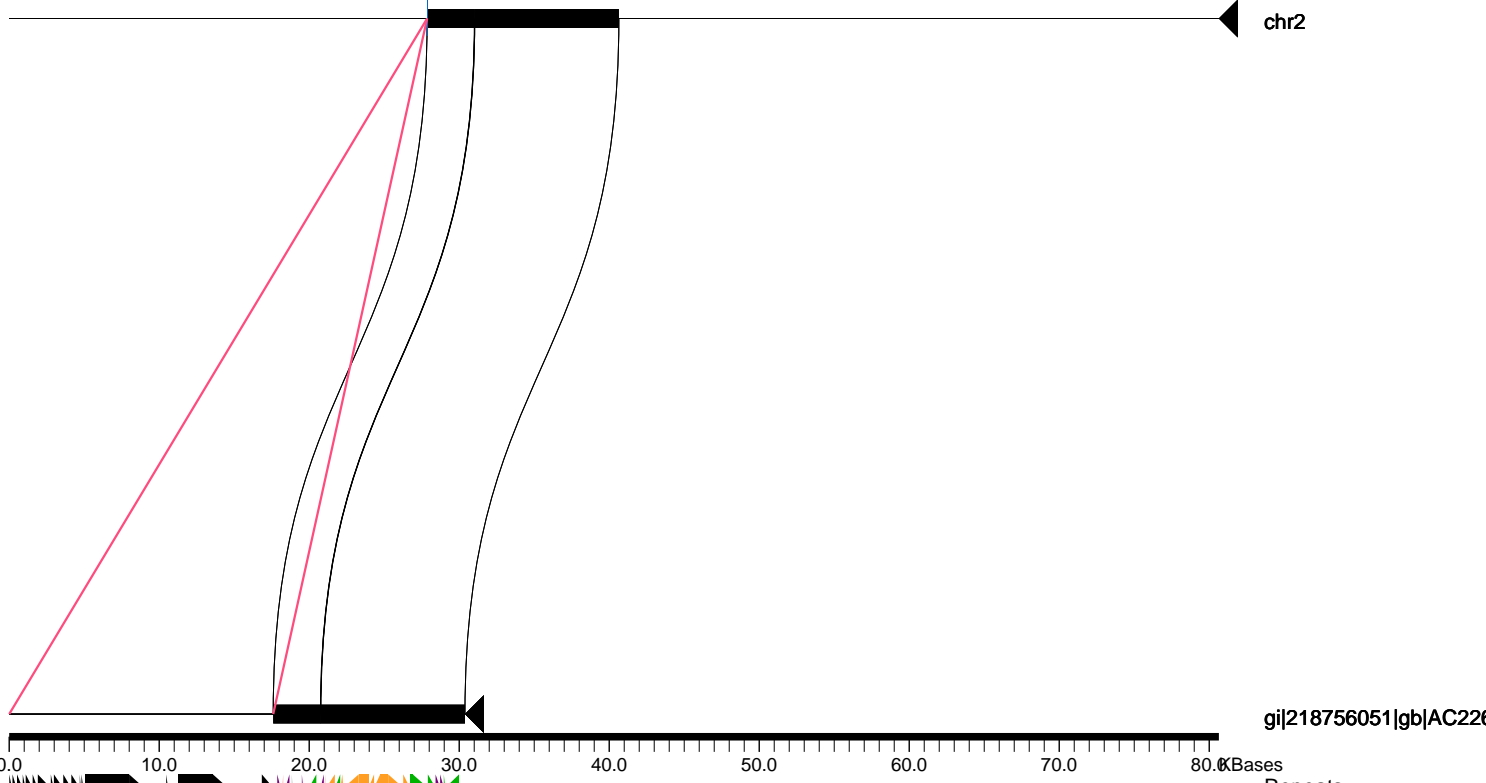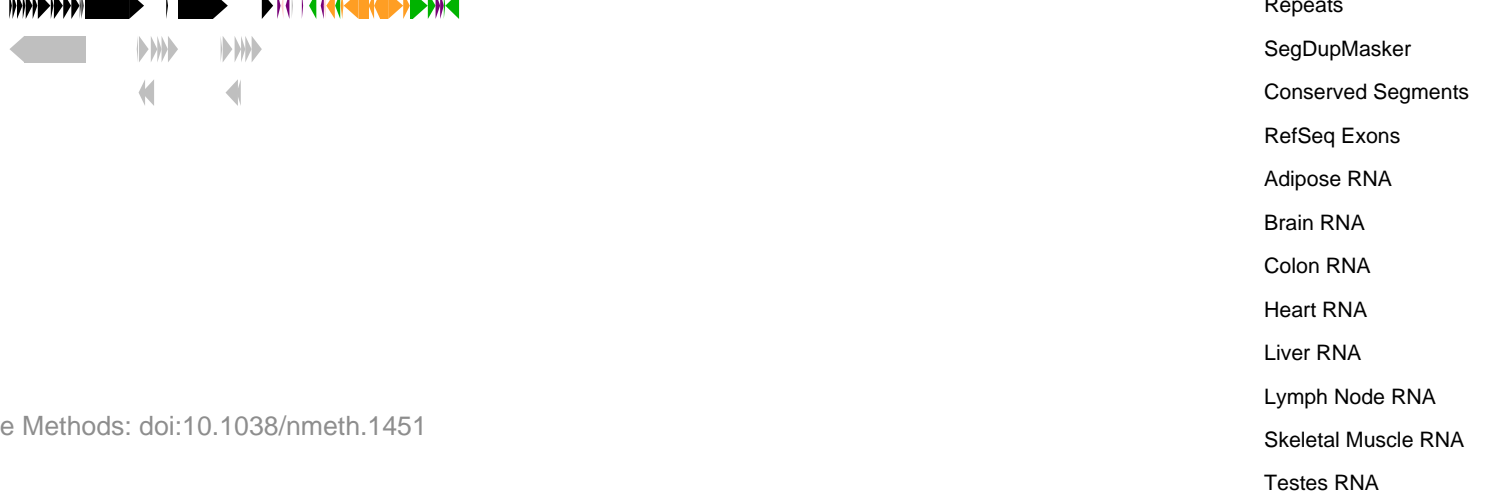

Clone file = AC226593.rc.fa

Insertion Size: 5095

Other Simple Repeat Low Complexity DNA LTR LINE SINE

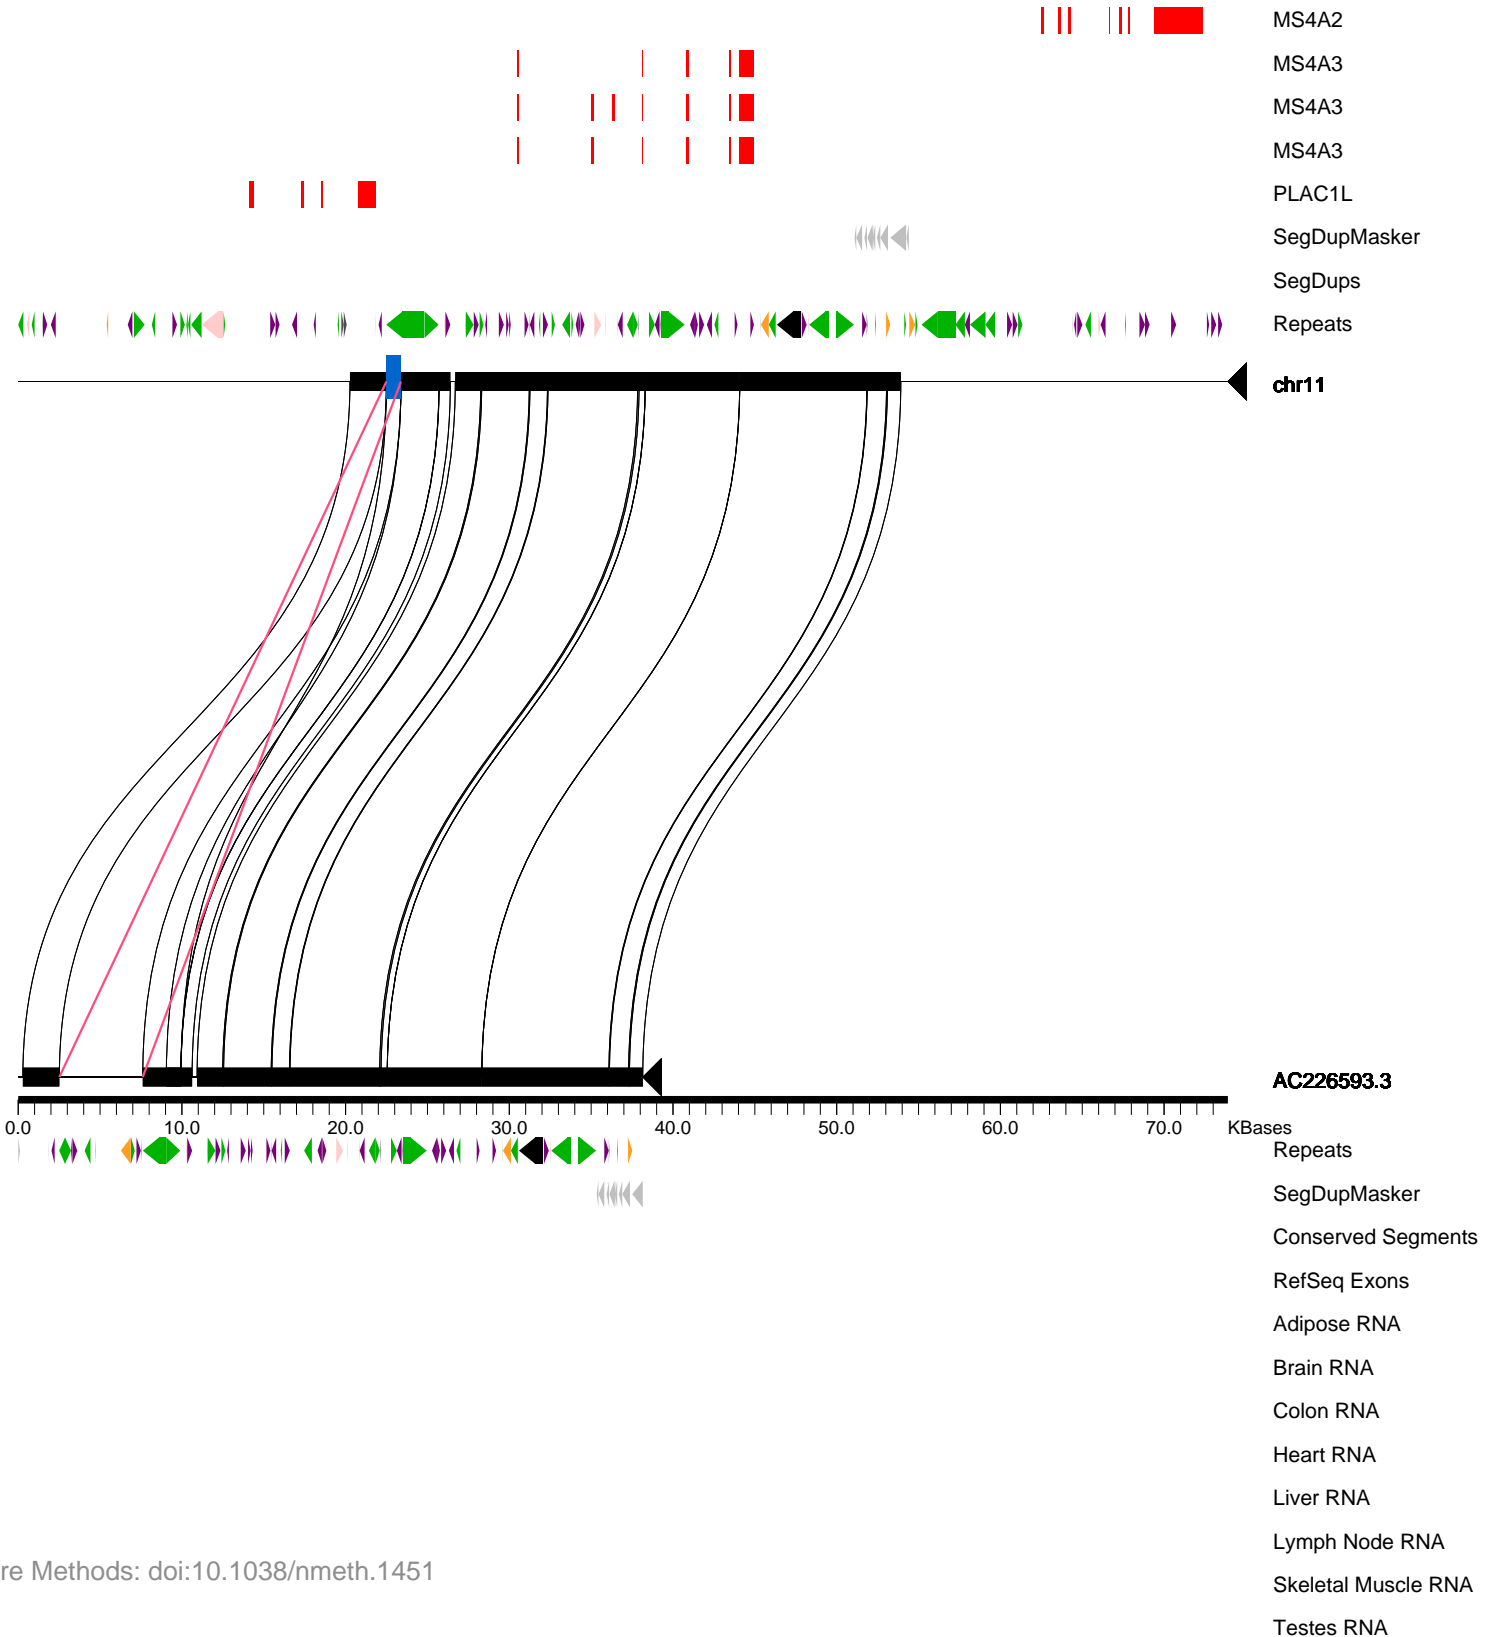

Clone file = AC226621.rc.fa

Insertion Size: 6066

Other Simple Repeat Low Complexity DNA LTR LINE SINE

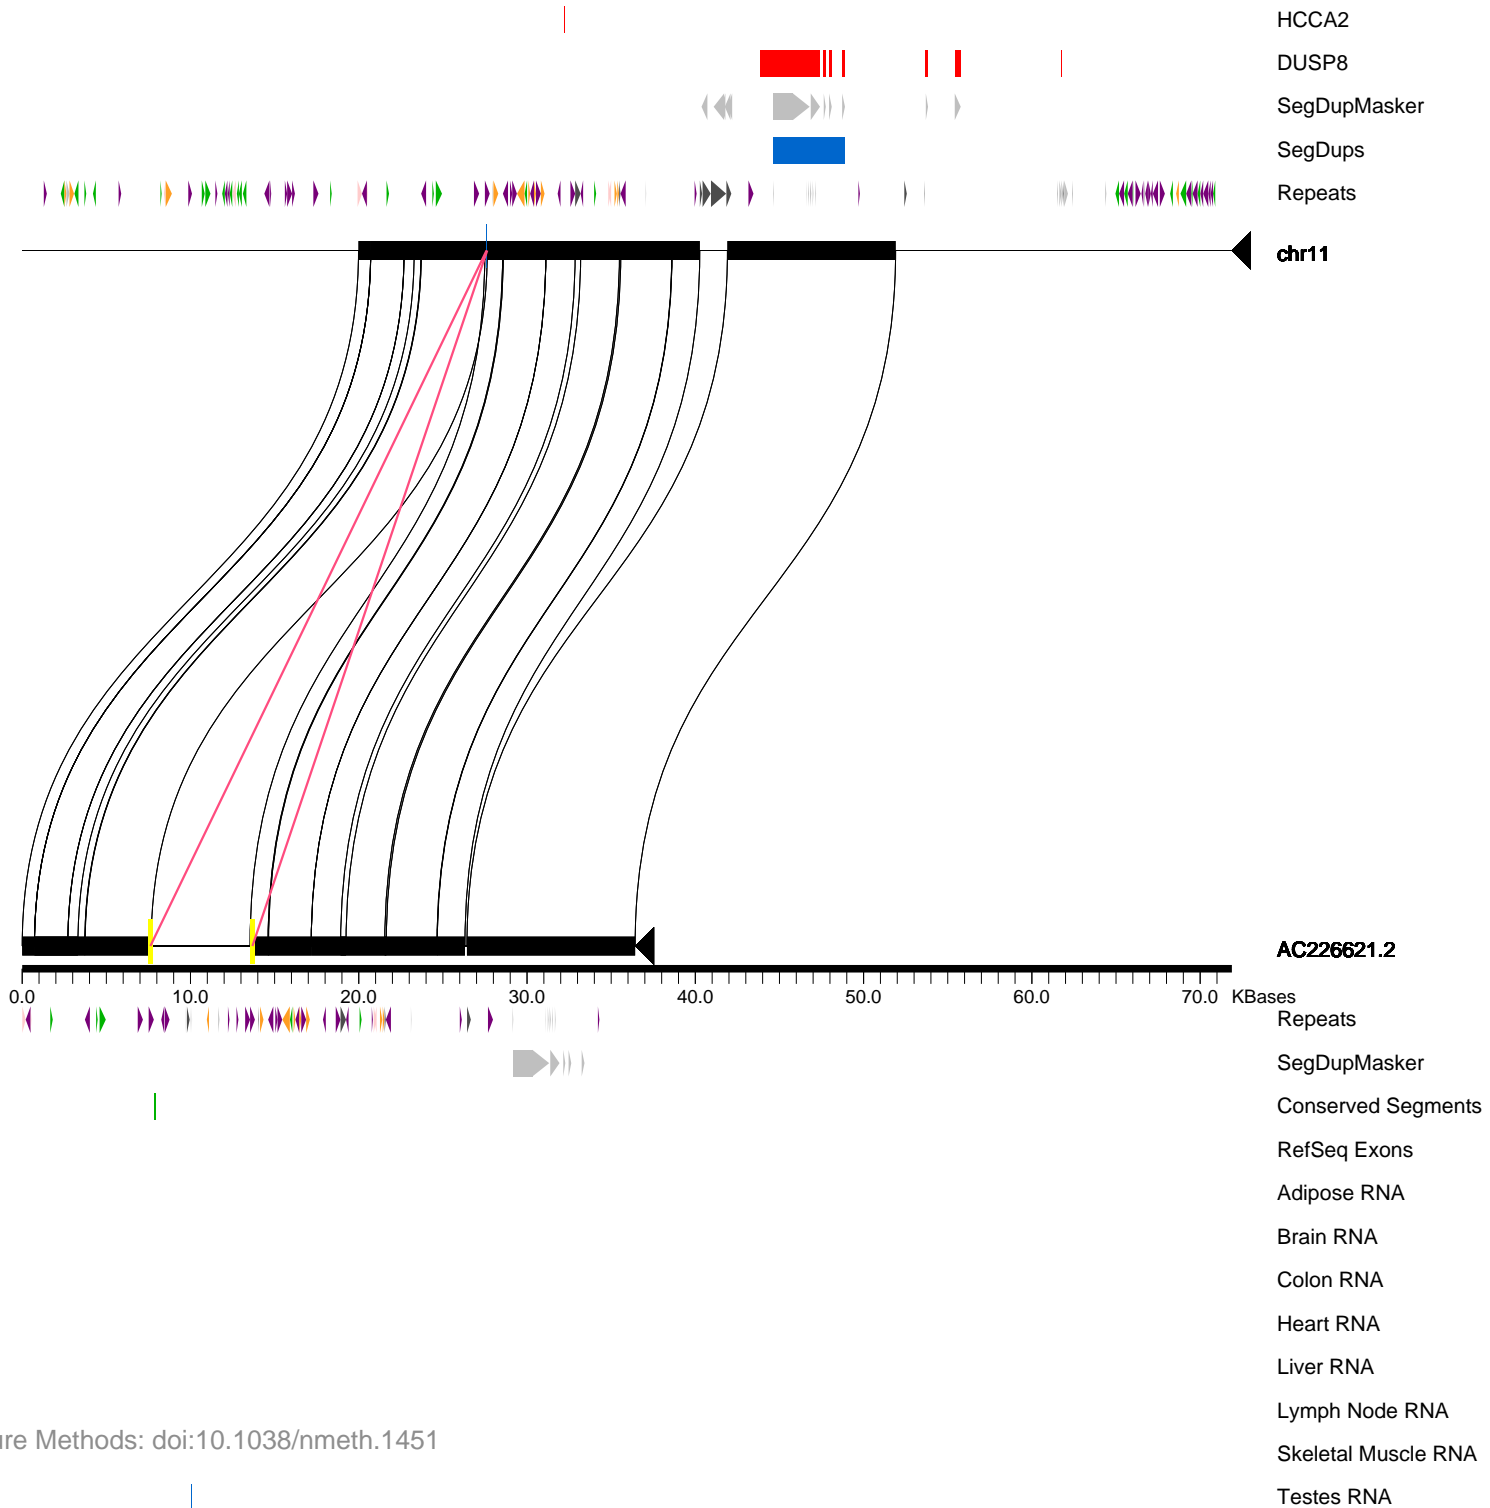

Clone file = AC226696.rc.fa

Insertion Size: 6624

Other Simple Repeat Low Complexity DNA LTR LINE SINE

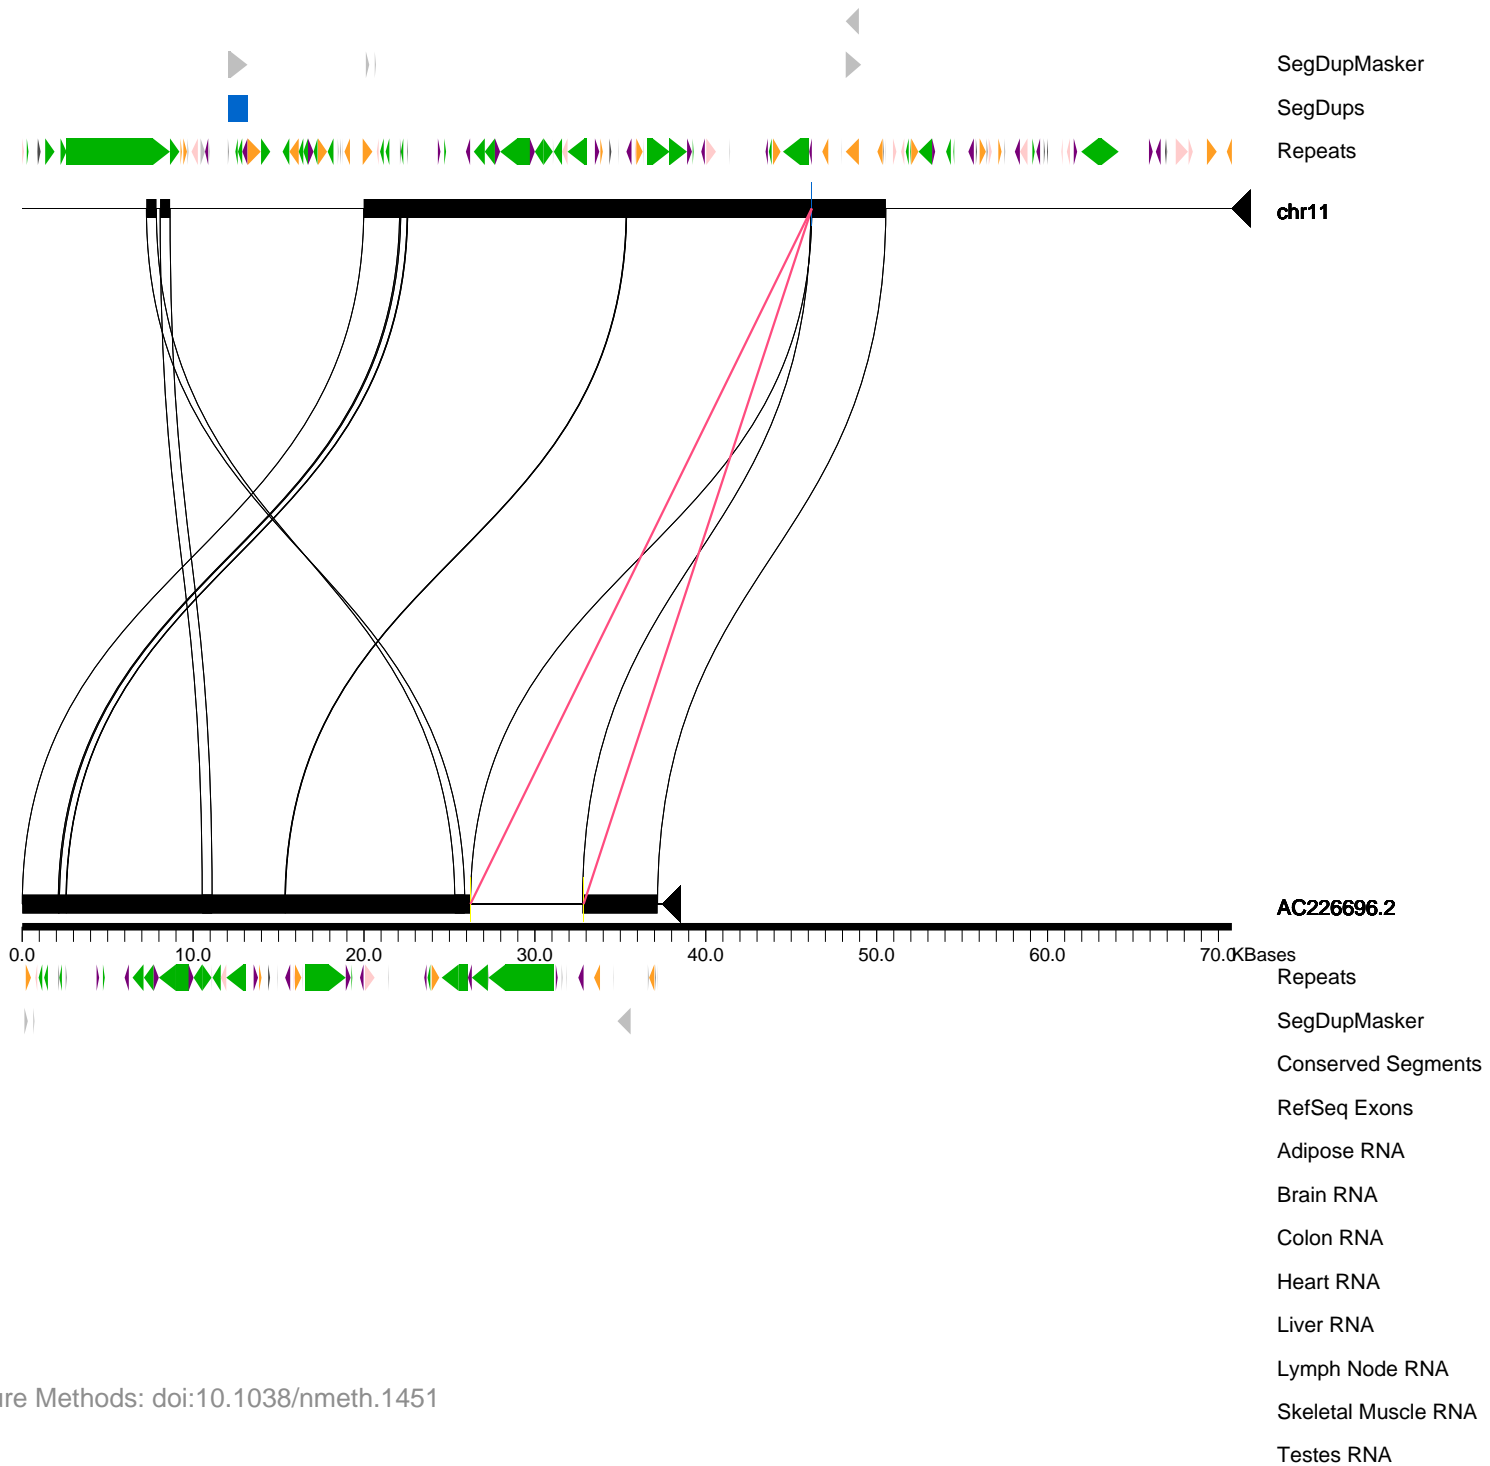

Clone file = AC226697.fa

Insertion Size: 4963

Other Simple Repeat Low Complexity DNA LTR LINE SINE

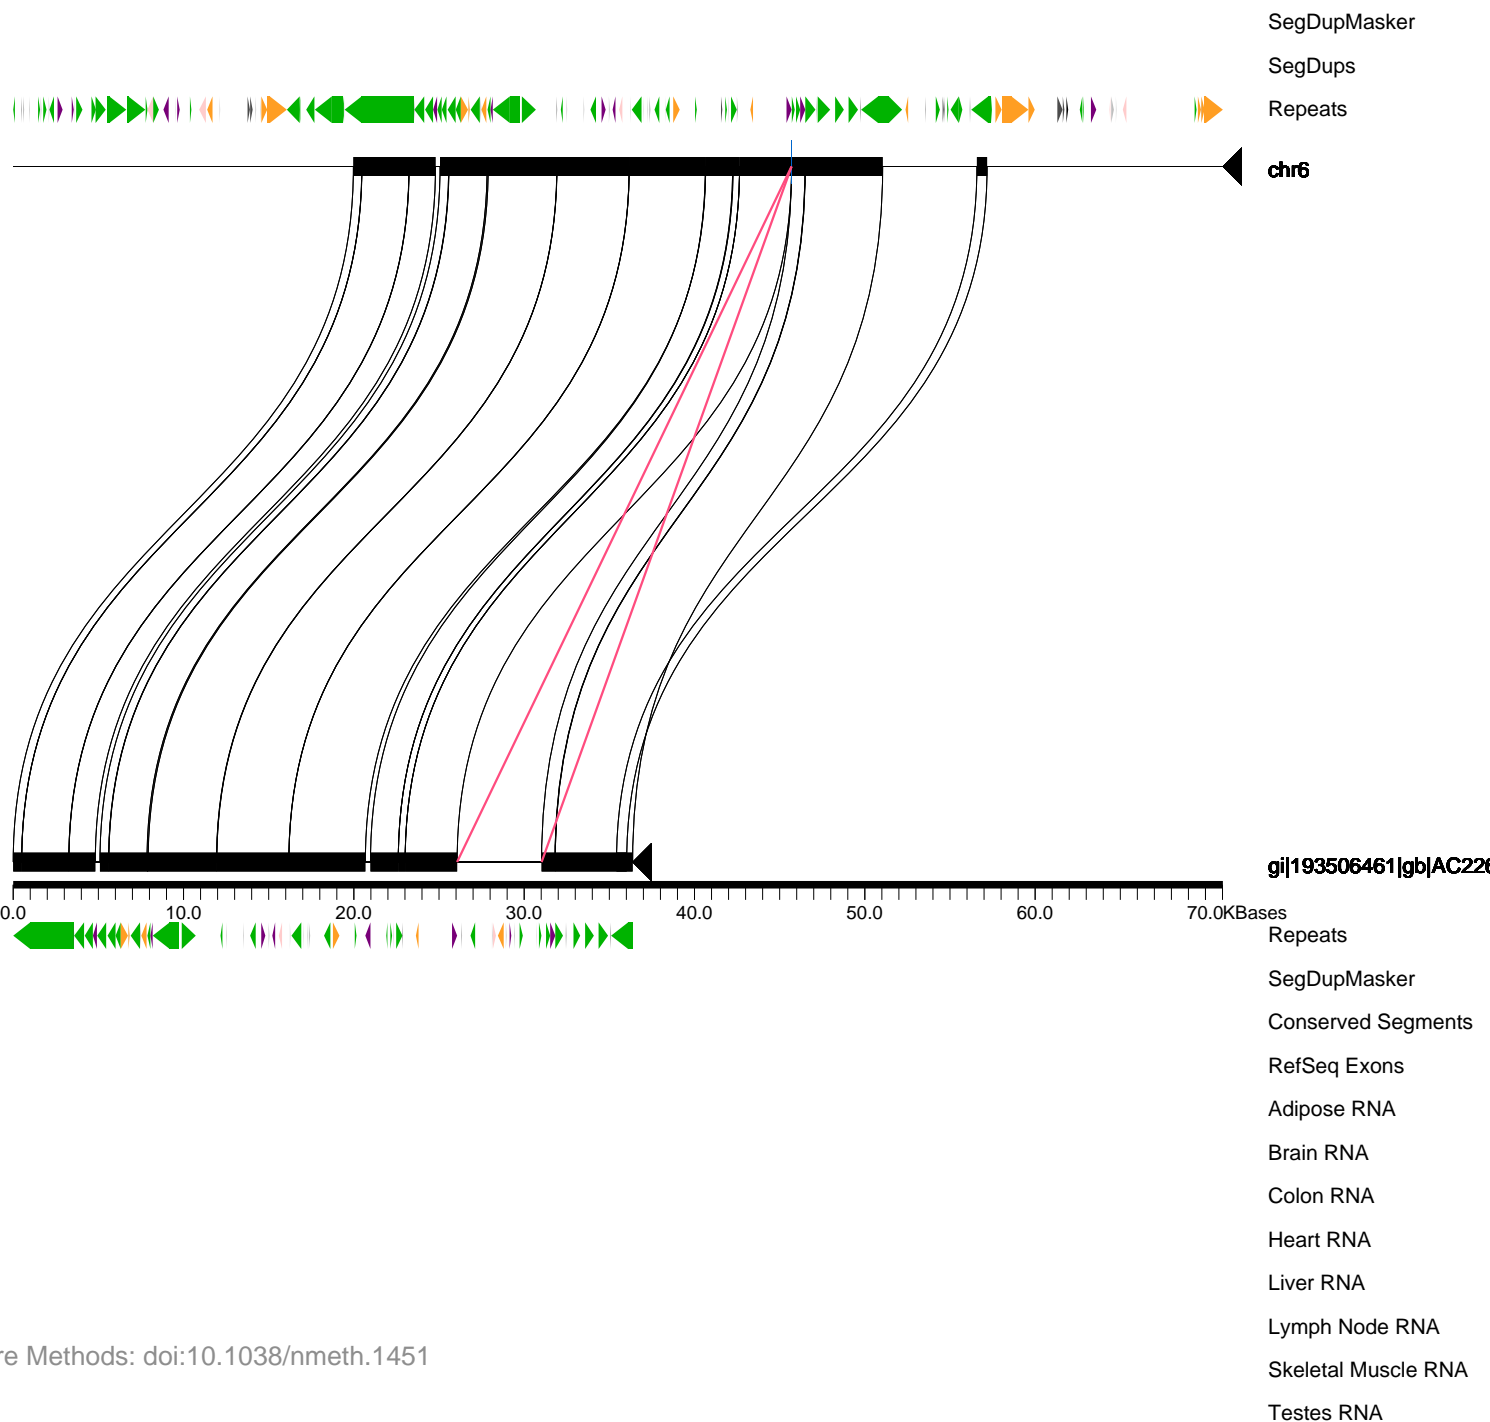

Clone file = AC226699.fa

Insertion Size: 4349

Other Simple Repeat Low Complexity DNA LTR LINE SINE

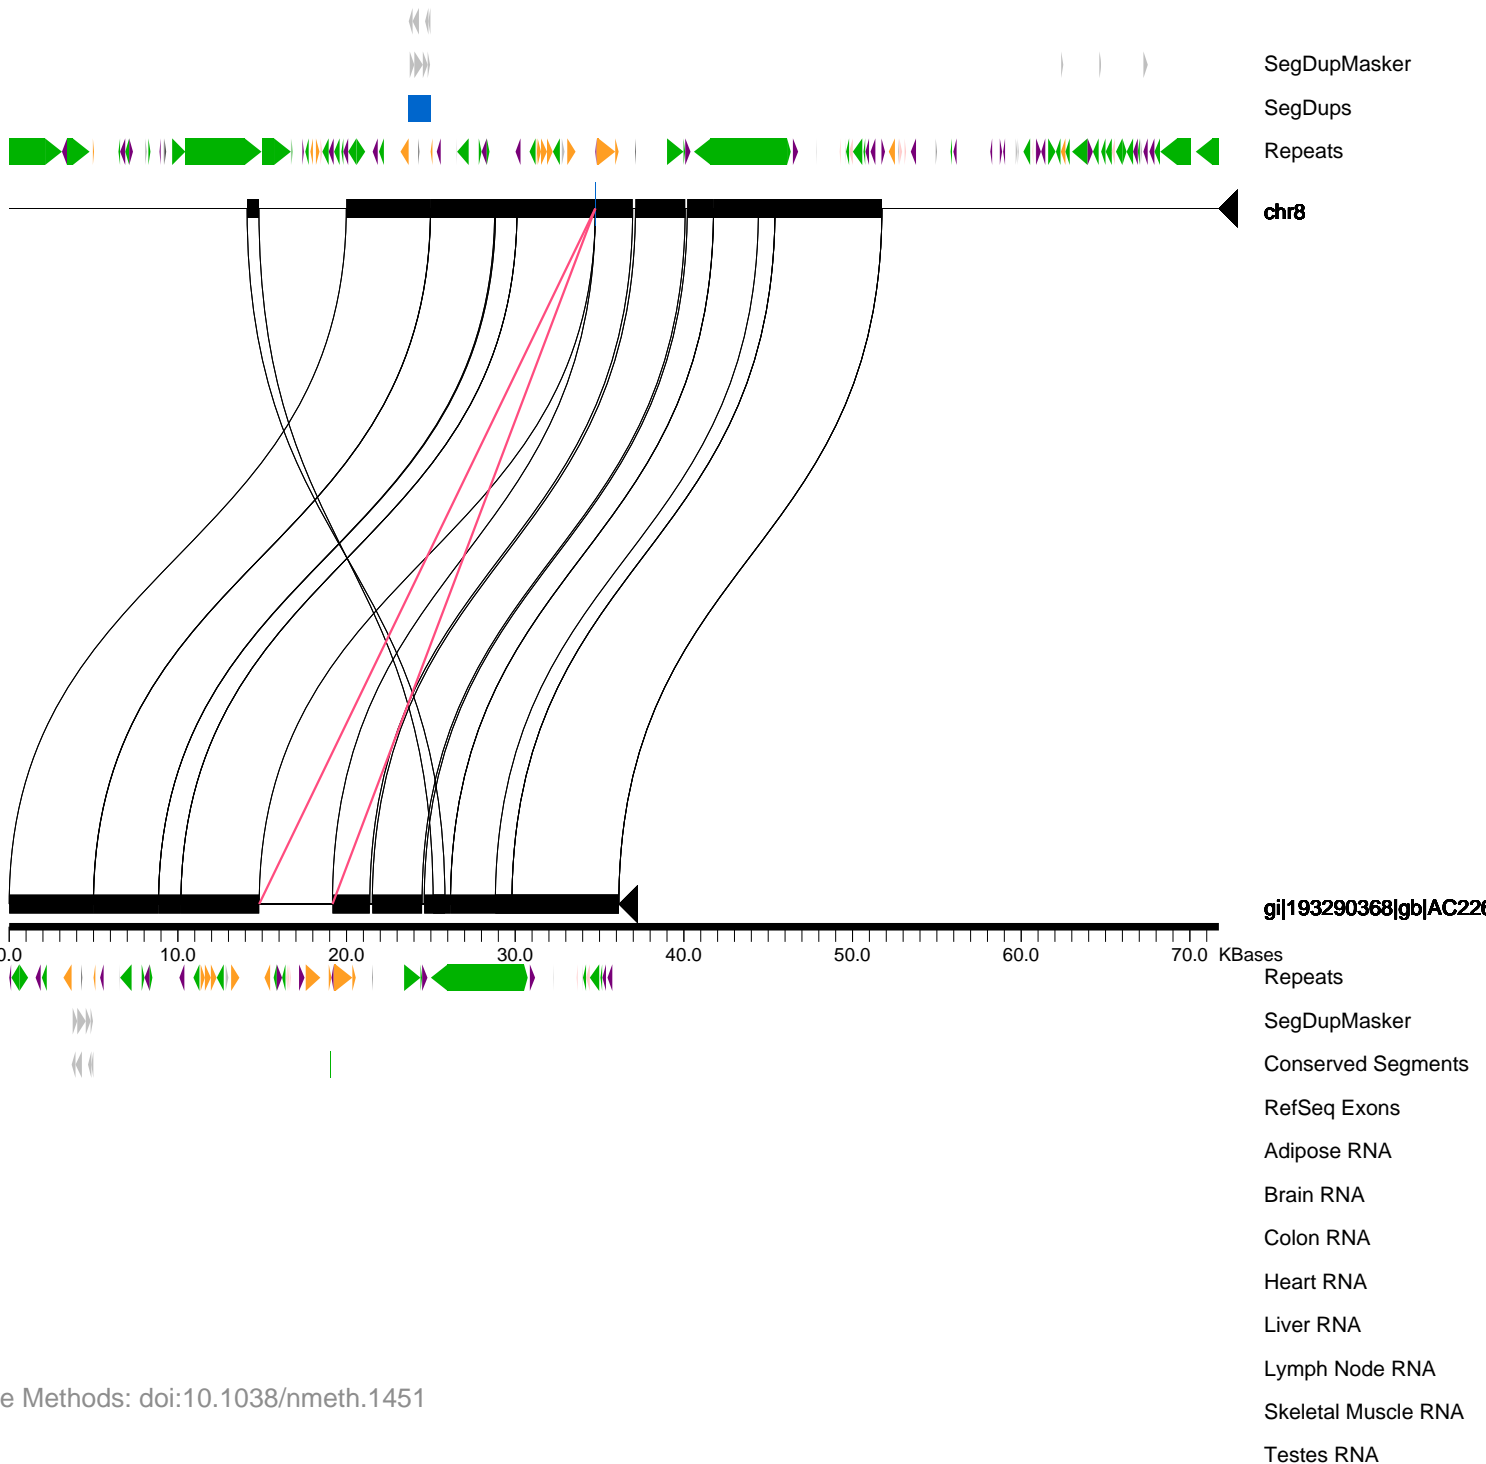



Clone file = AC226724.fa

Insertion Size: 1077

Other Simple Repeat Low Complexity DNA LTR LINE SINE

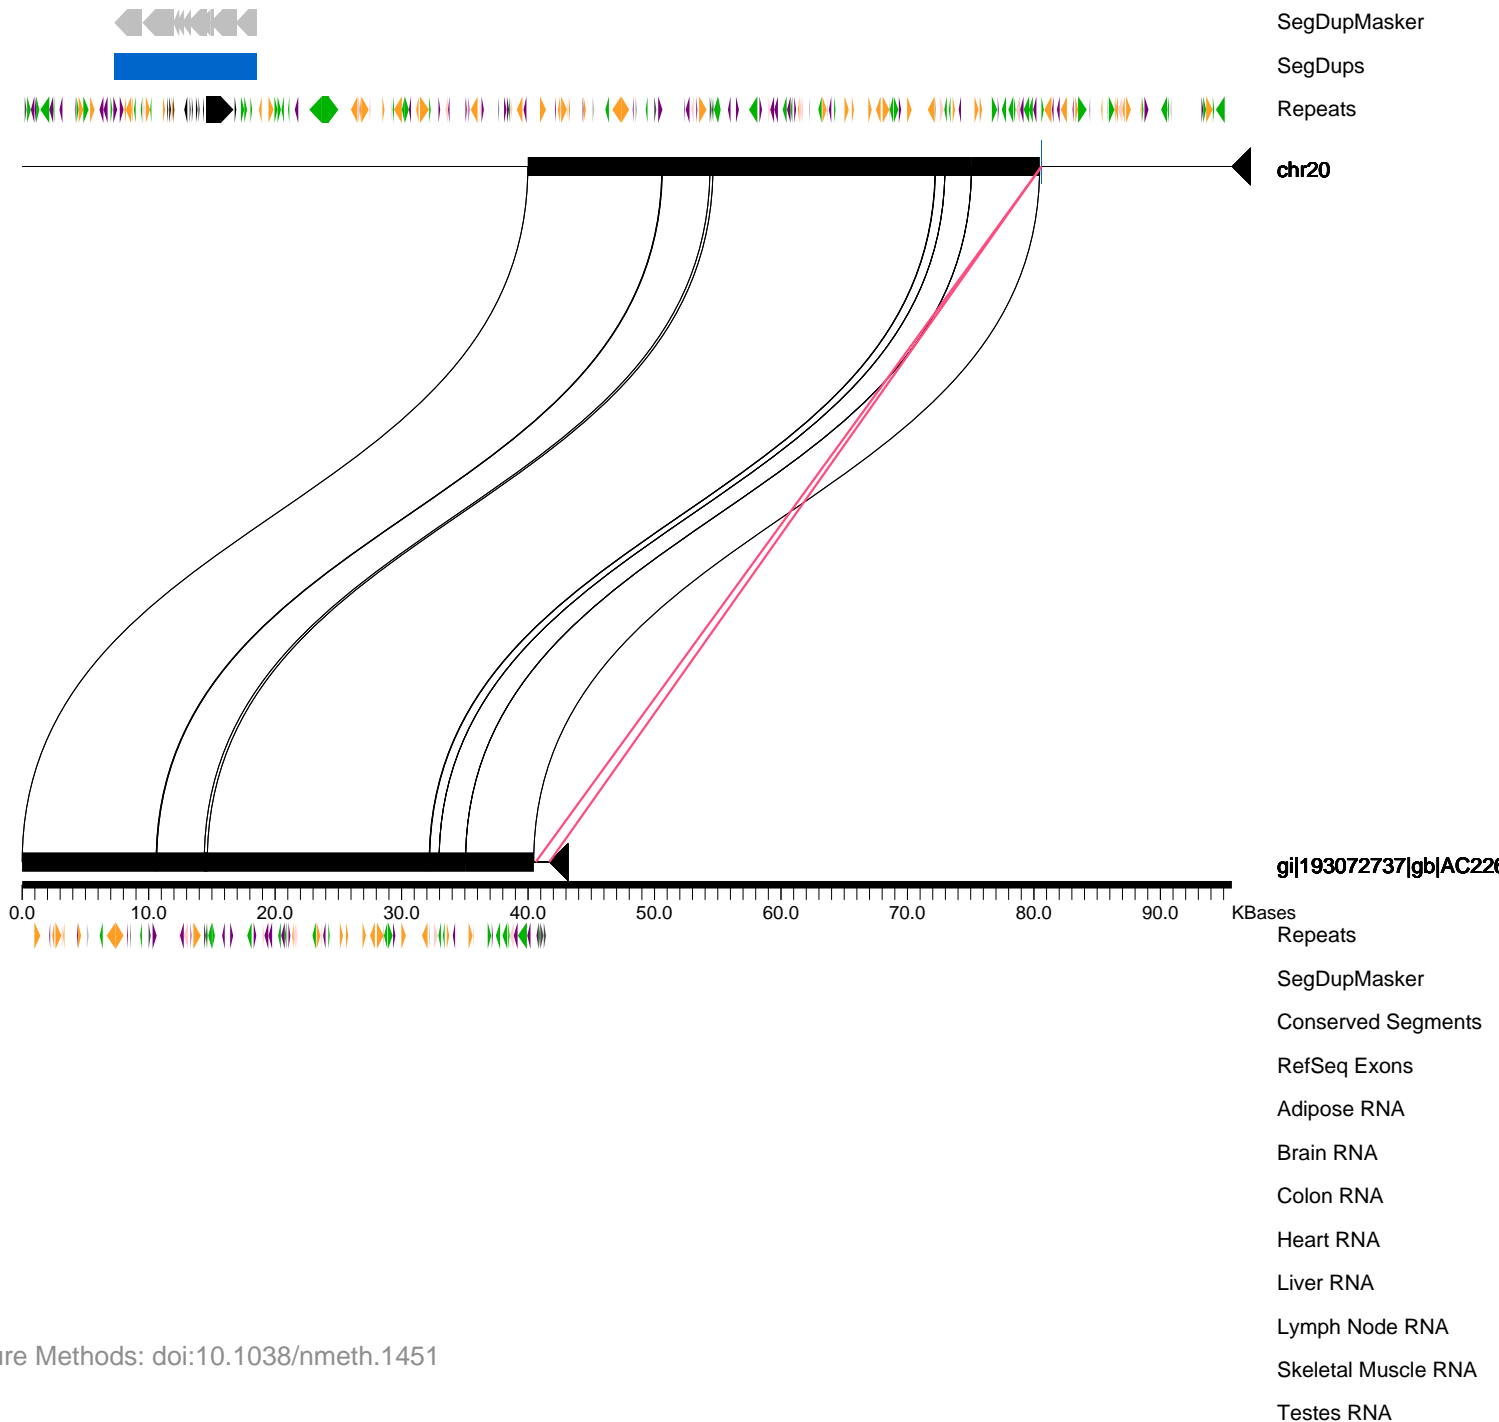

Clone file = AC226762.rc.fa

Insertion Size: 2033

Other Simple Repeat Low Complexity DNA LTR LINE SINE

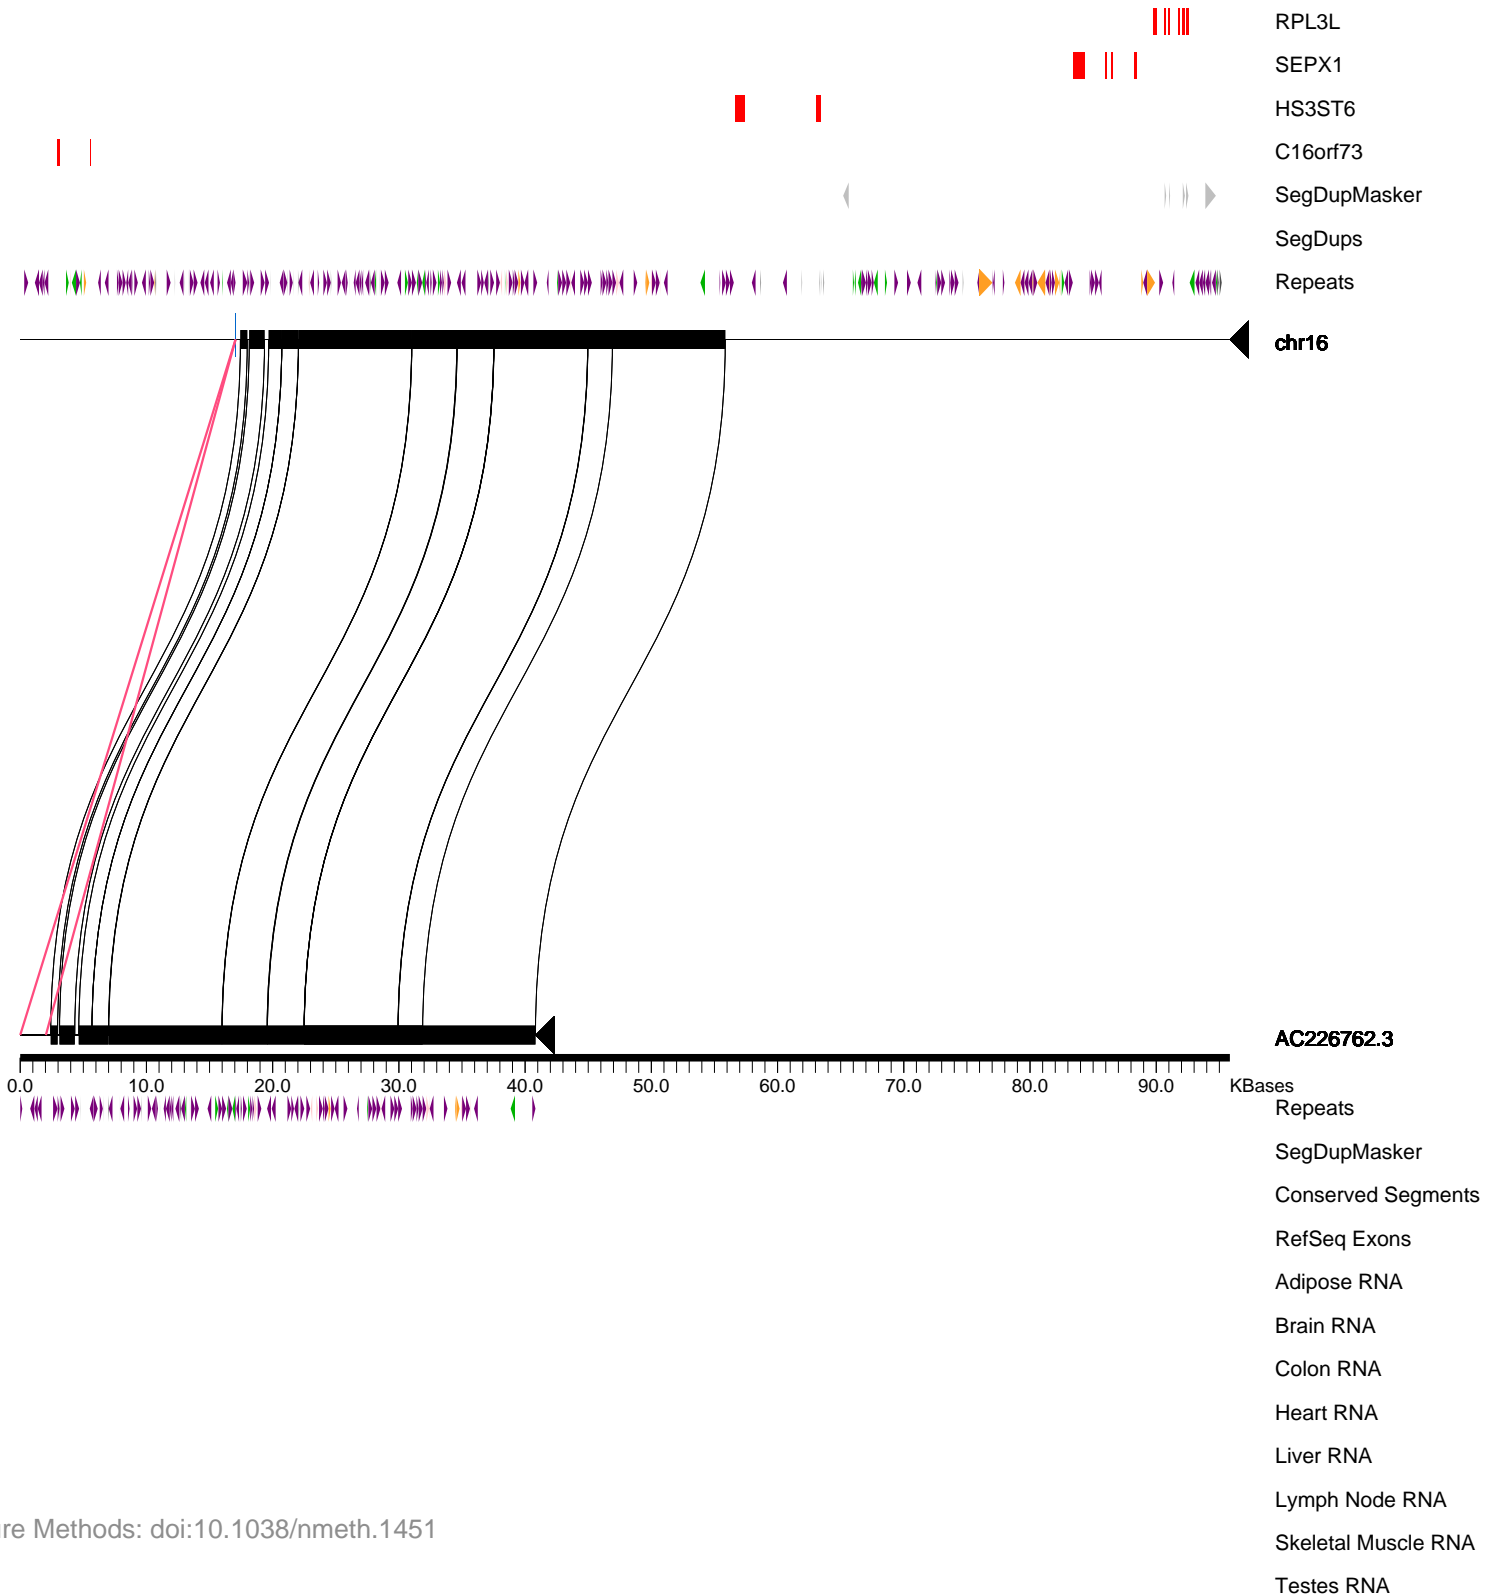

Clone file = AC226767.fa

Insertion Size: 4981

Other Simple Repeat Low Complexity DNA LTR LINE SINE

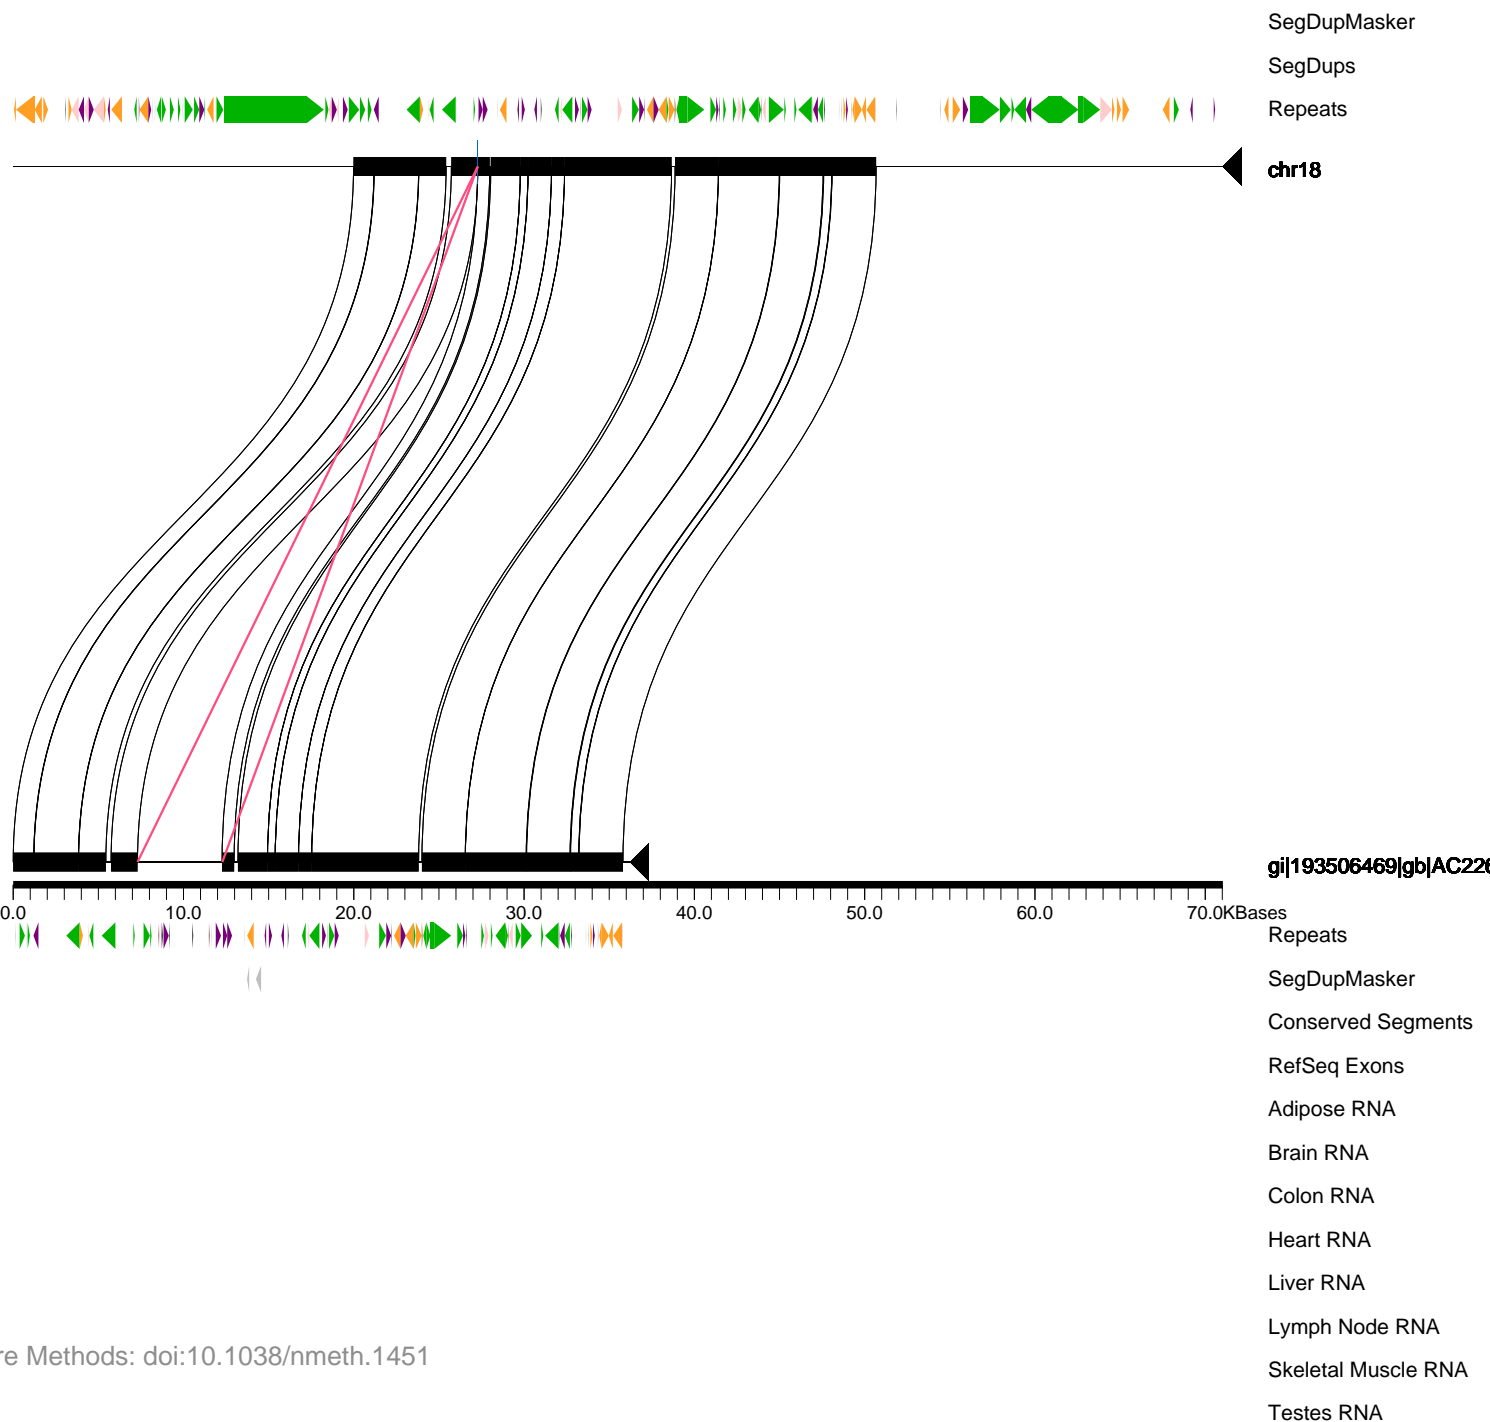

Clone file = AC226804.fa

Insertion Size: 7832

Other Simple Repeat Low Complexity DNA LTR LINE SINE

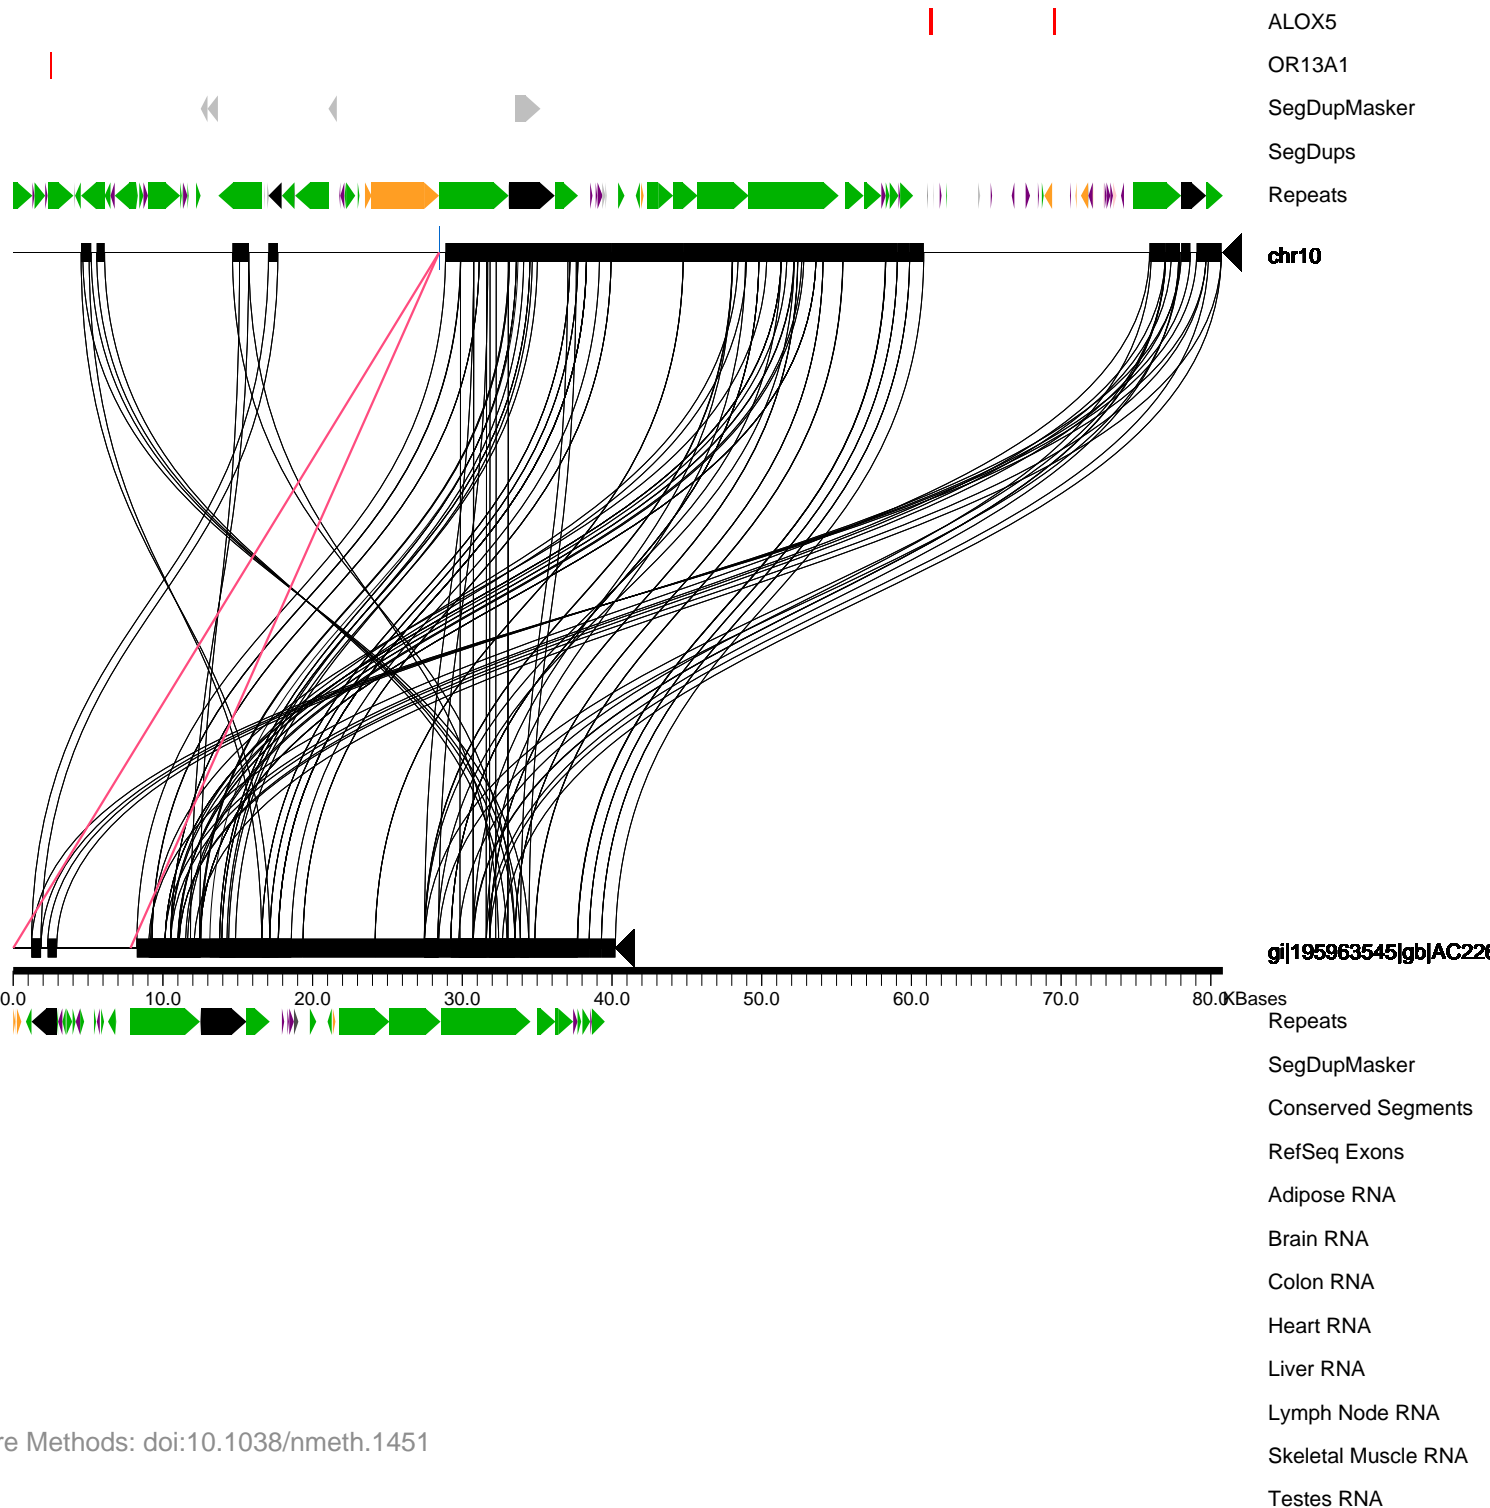

Clone file = AC229891.rc.fa

Insertion Size: 892

Other Simple Repeat Low Complexity DNA LTR LINE SINE

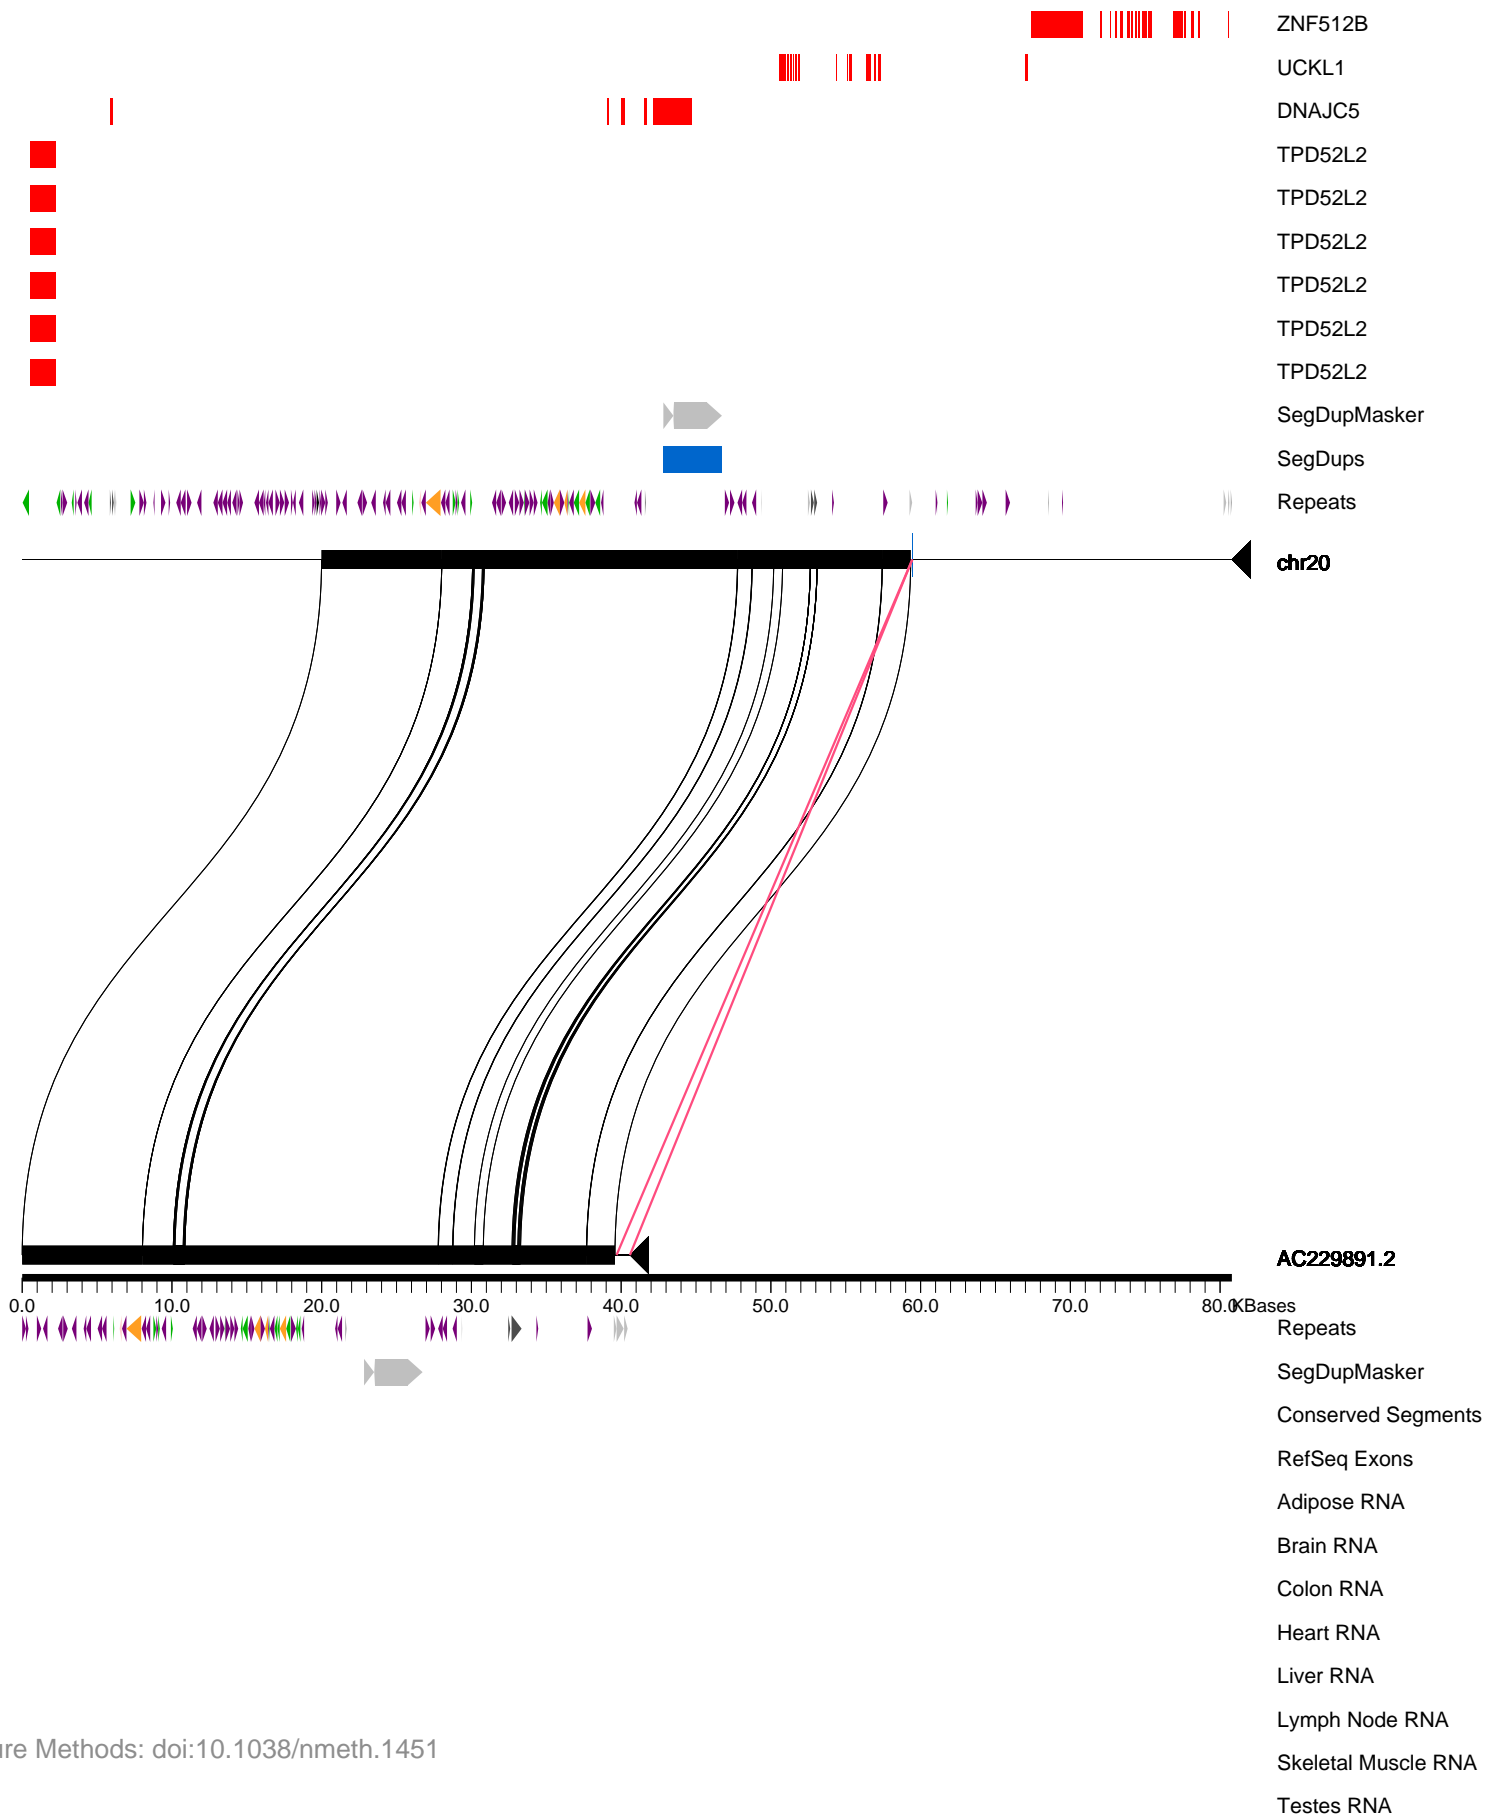

Clone file = AC231117.rc.fa

Insertion Size: 38667

Other Simple Repeat Low Complexity DNA LTR LINE SINE

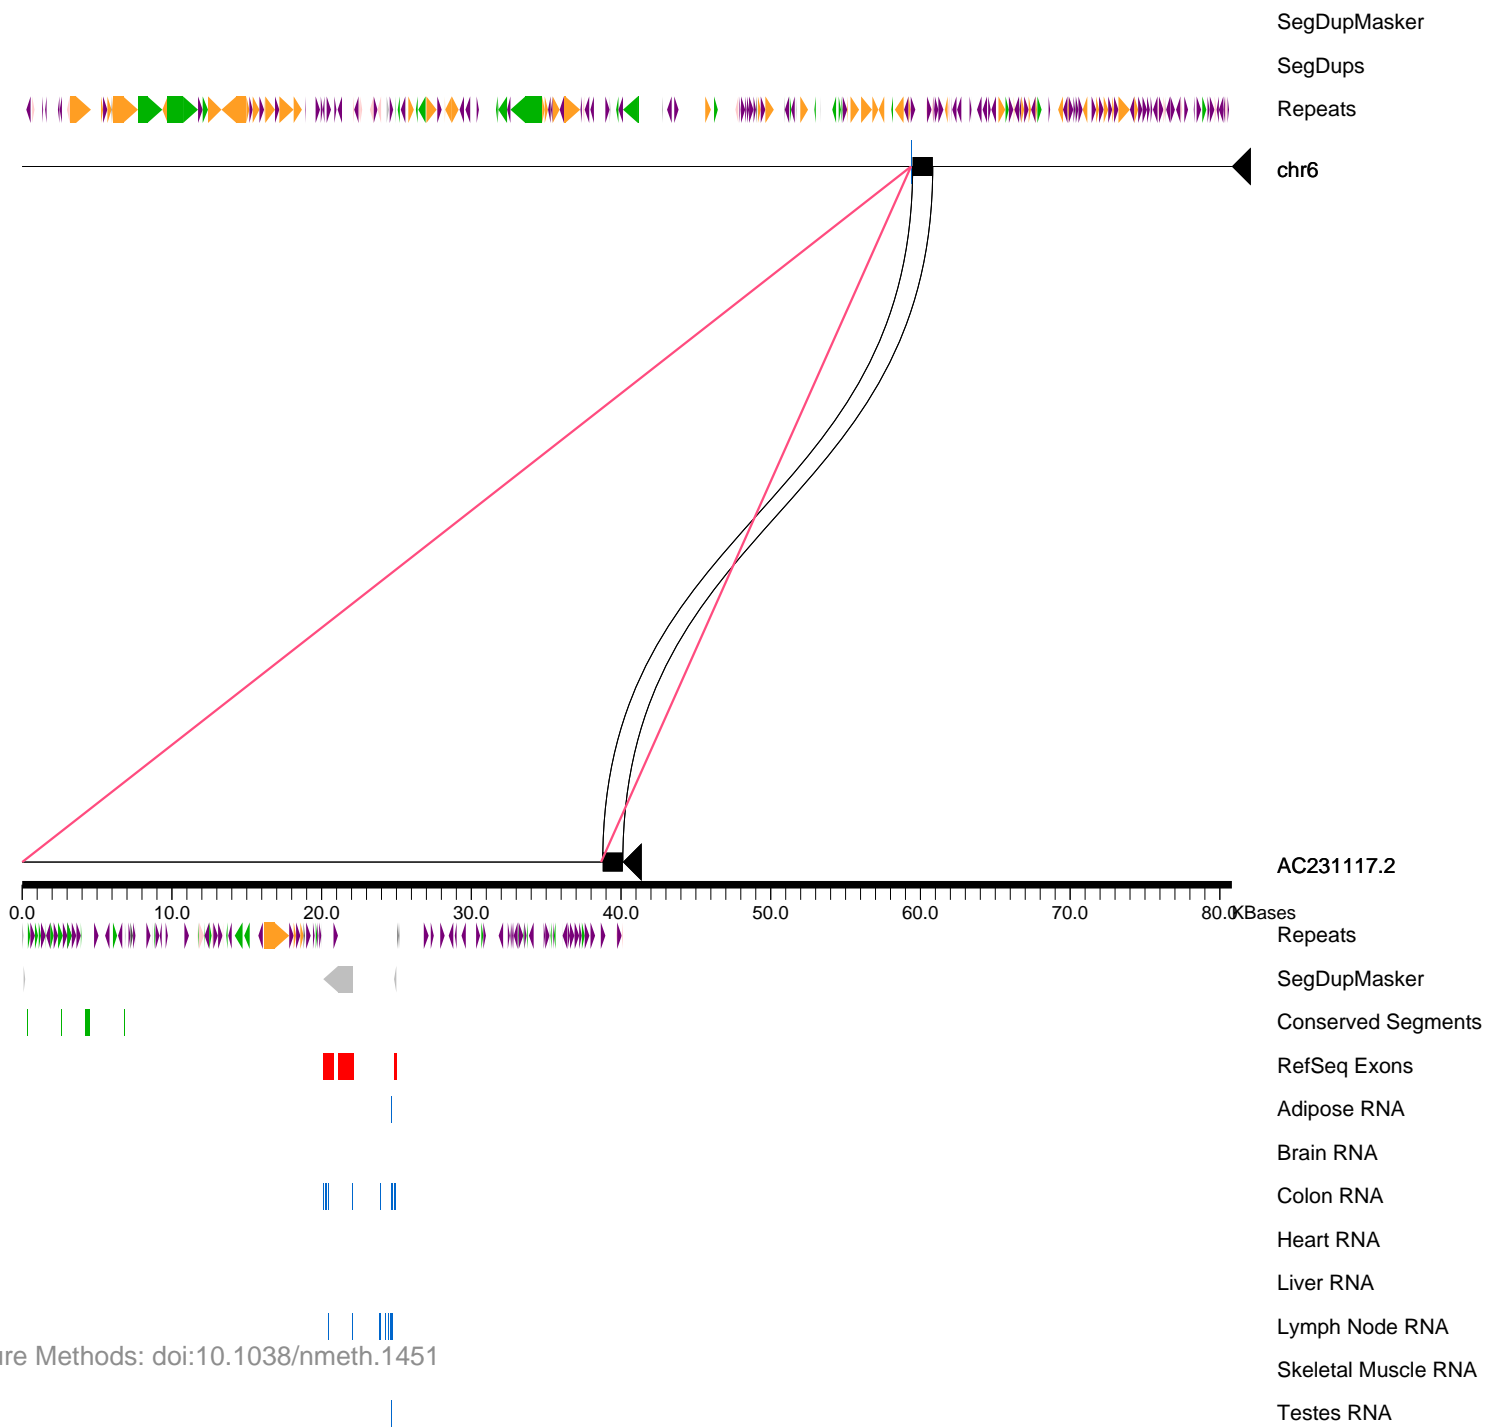

Clone file = AC231118.fa

Insertion Size: 39015

Other Simple Repeat Low Complexity DNA LTR LINE SINE

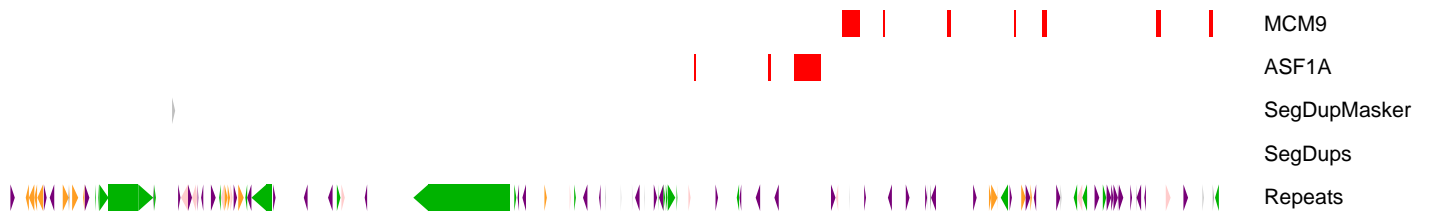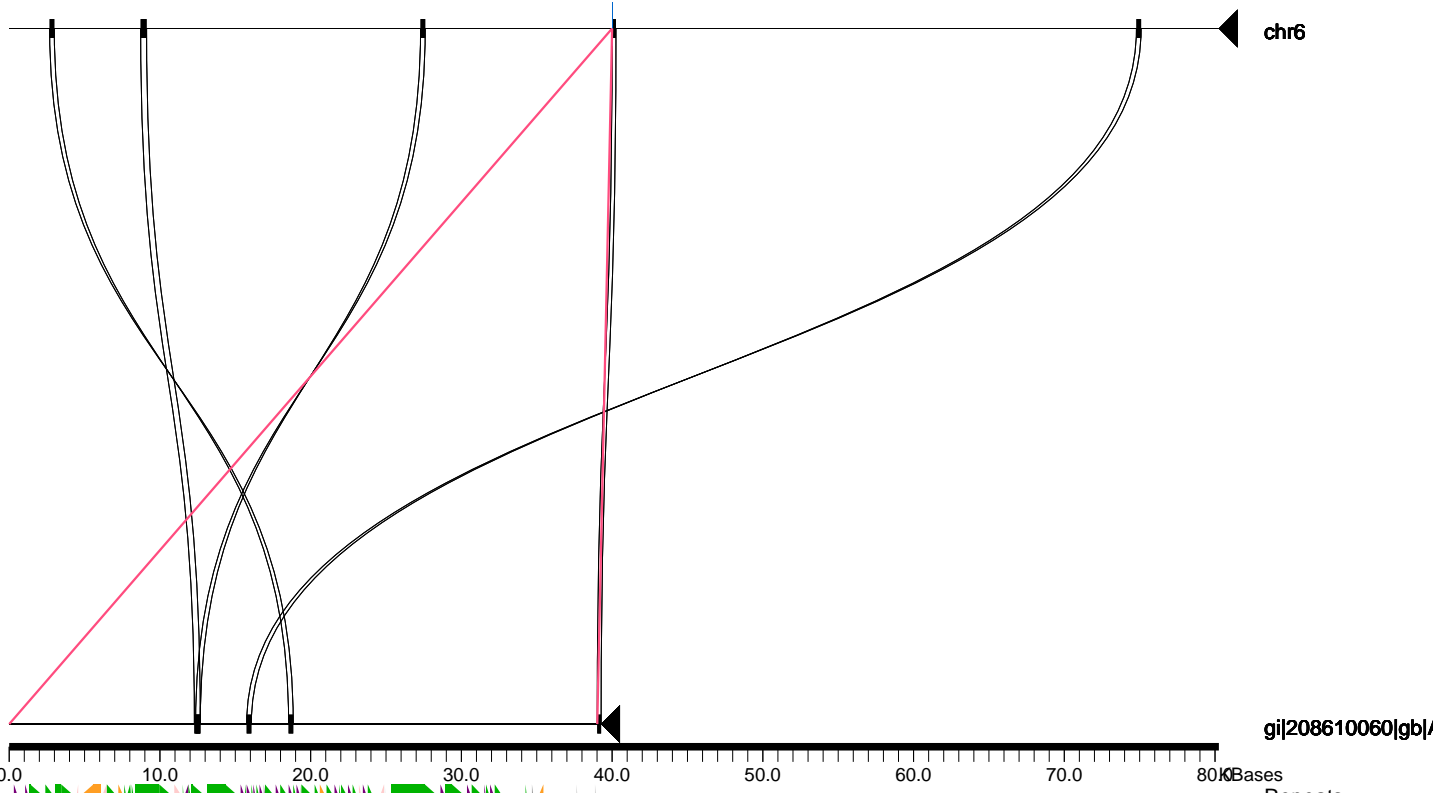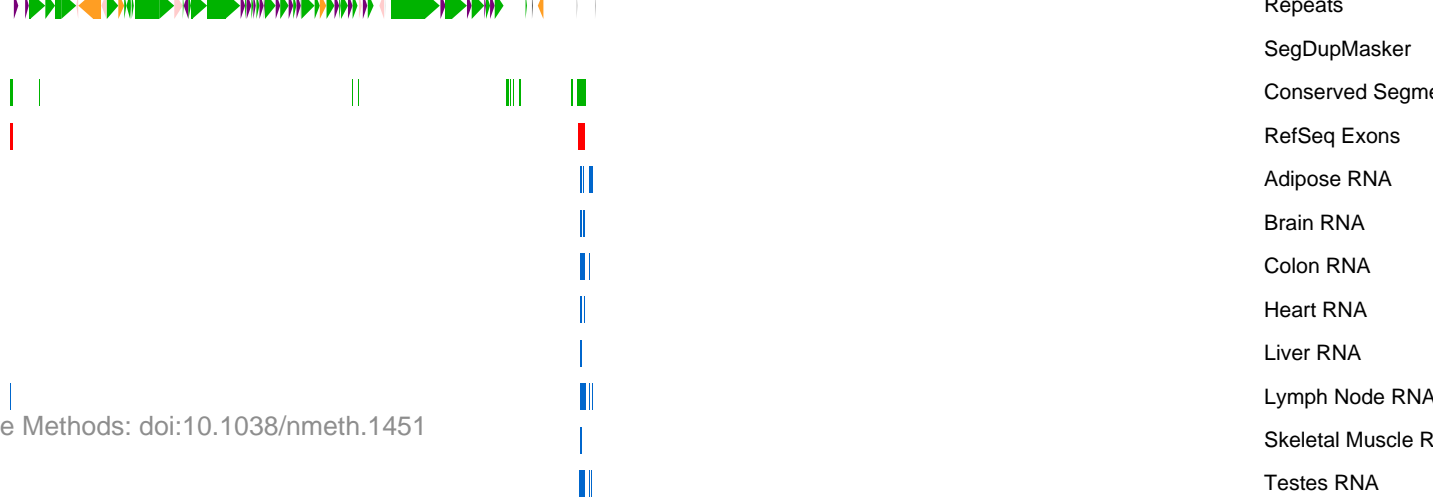

Clone file = AC231189.rc.fa

Insertion Size: 1002

Other Simple Repeat Low Complexity DNA LTR LINE SINE

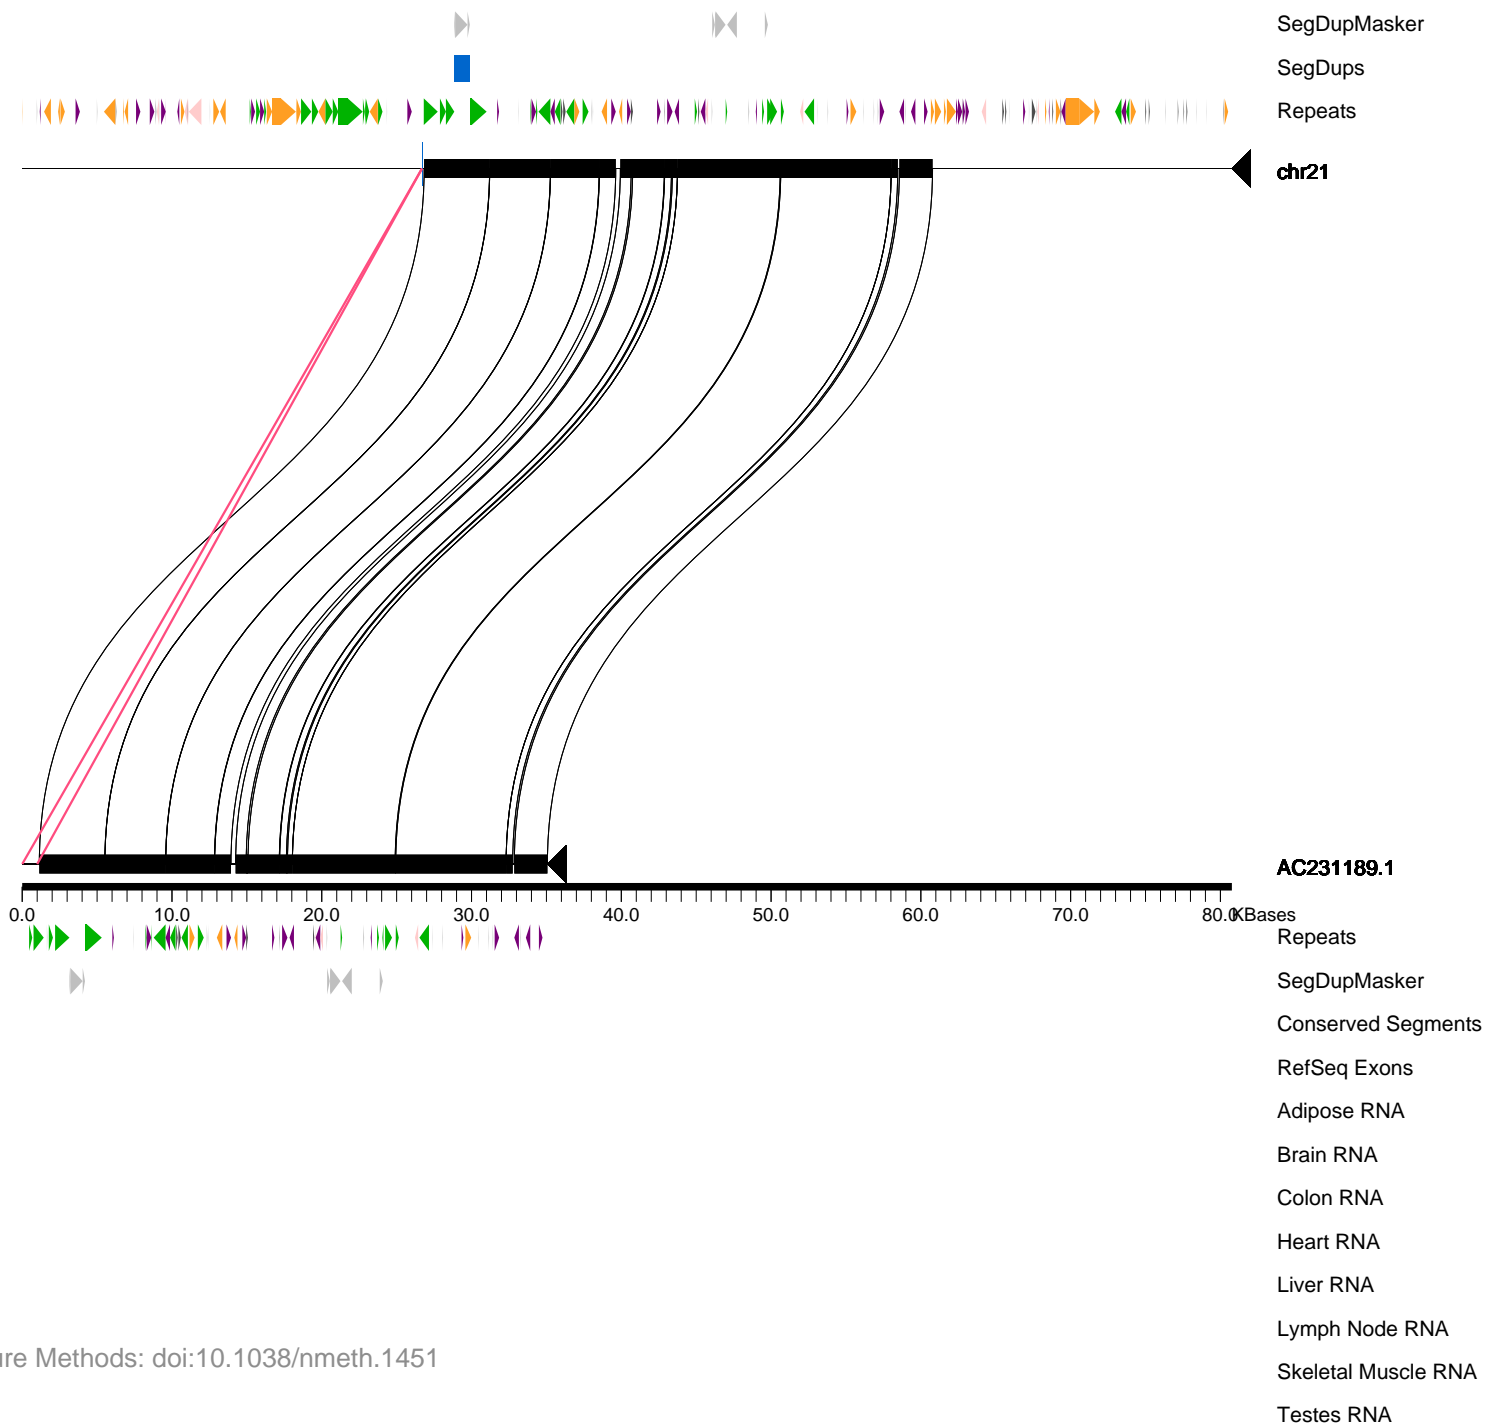



Clone file = AC231198.rc.fa

Insertion Size: 29057

Other Simple Repeat Low Complexity DNA LTR LINE SINE

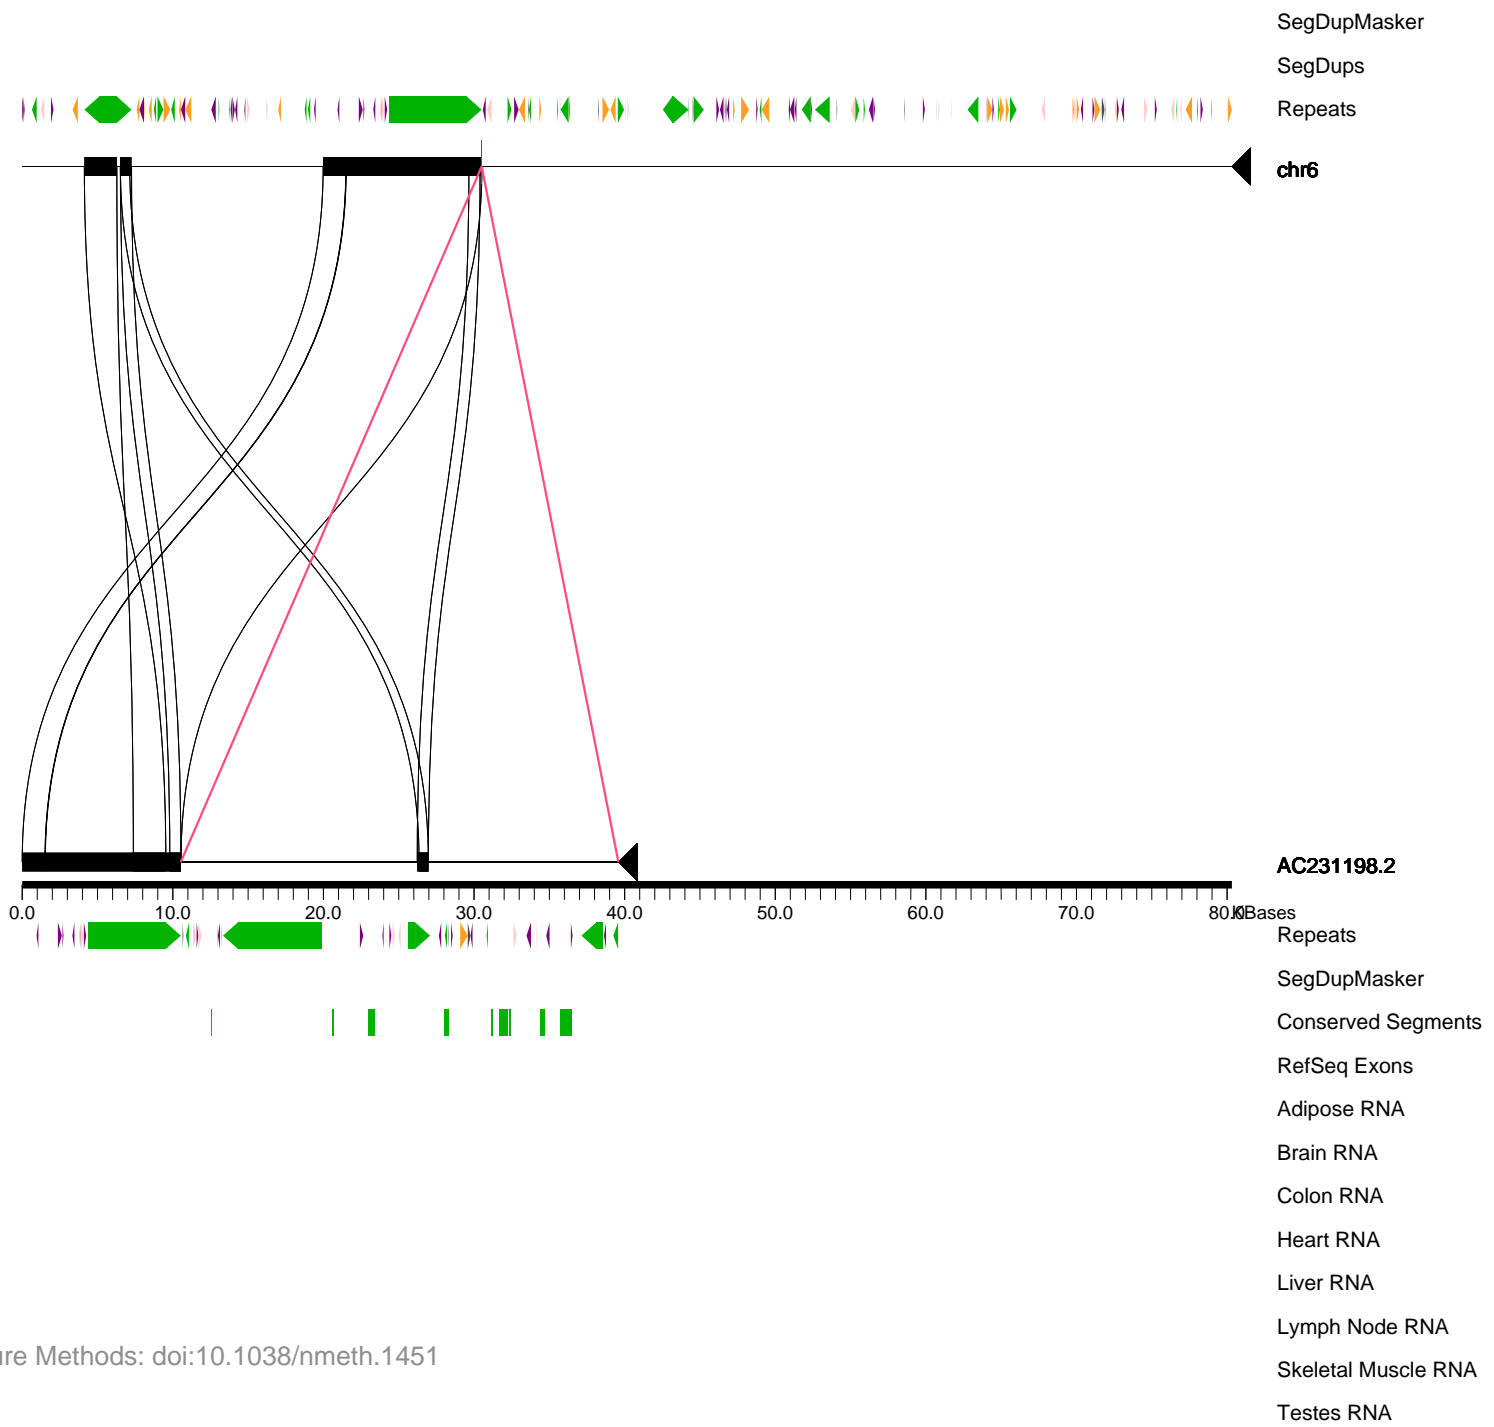

Clone file = AC231273.rc.fa

Insertion Size: 31455

Other Simple Repeat Low Complexity DNA LTR LINE SINE

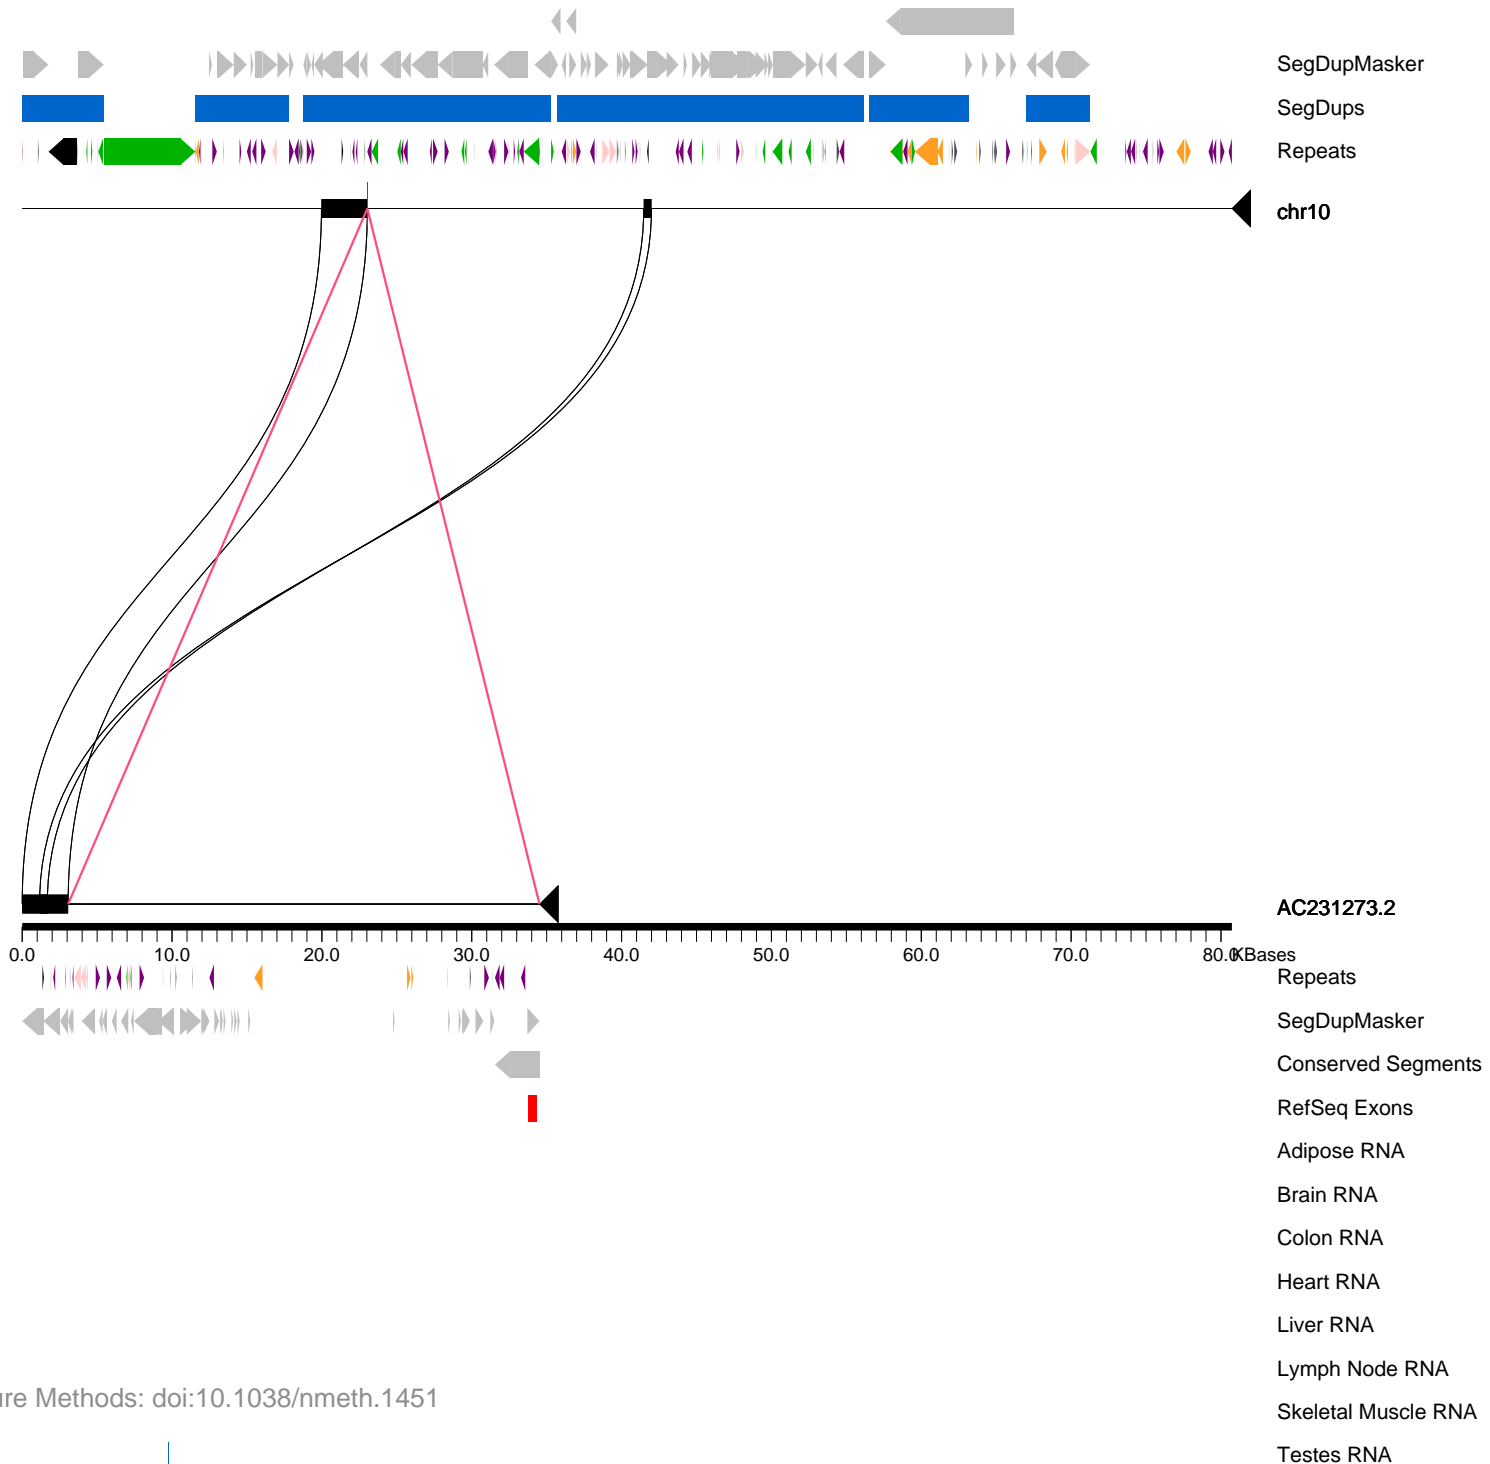

Clone file = AC231276.rc.fa

Insertion Size: 735

Other Simple Repeat Low Complexity DNA LTR LINE SINE

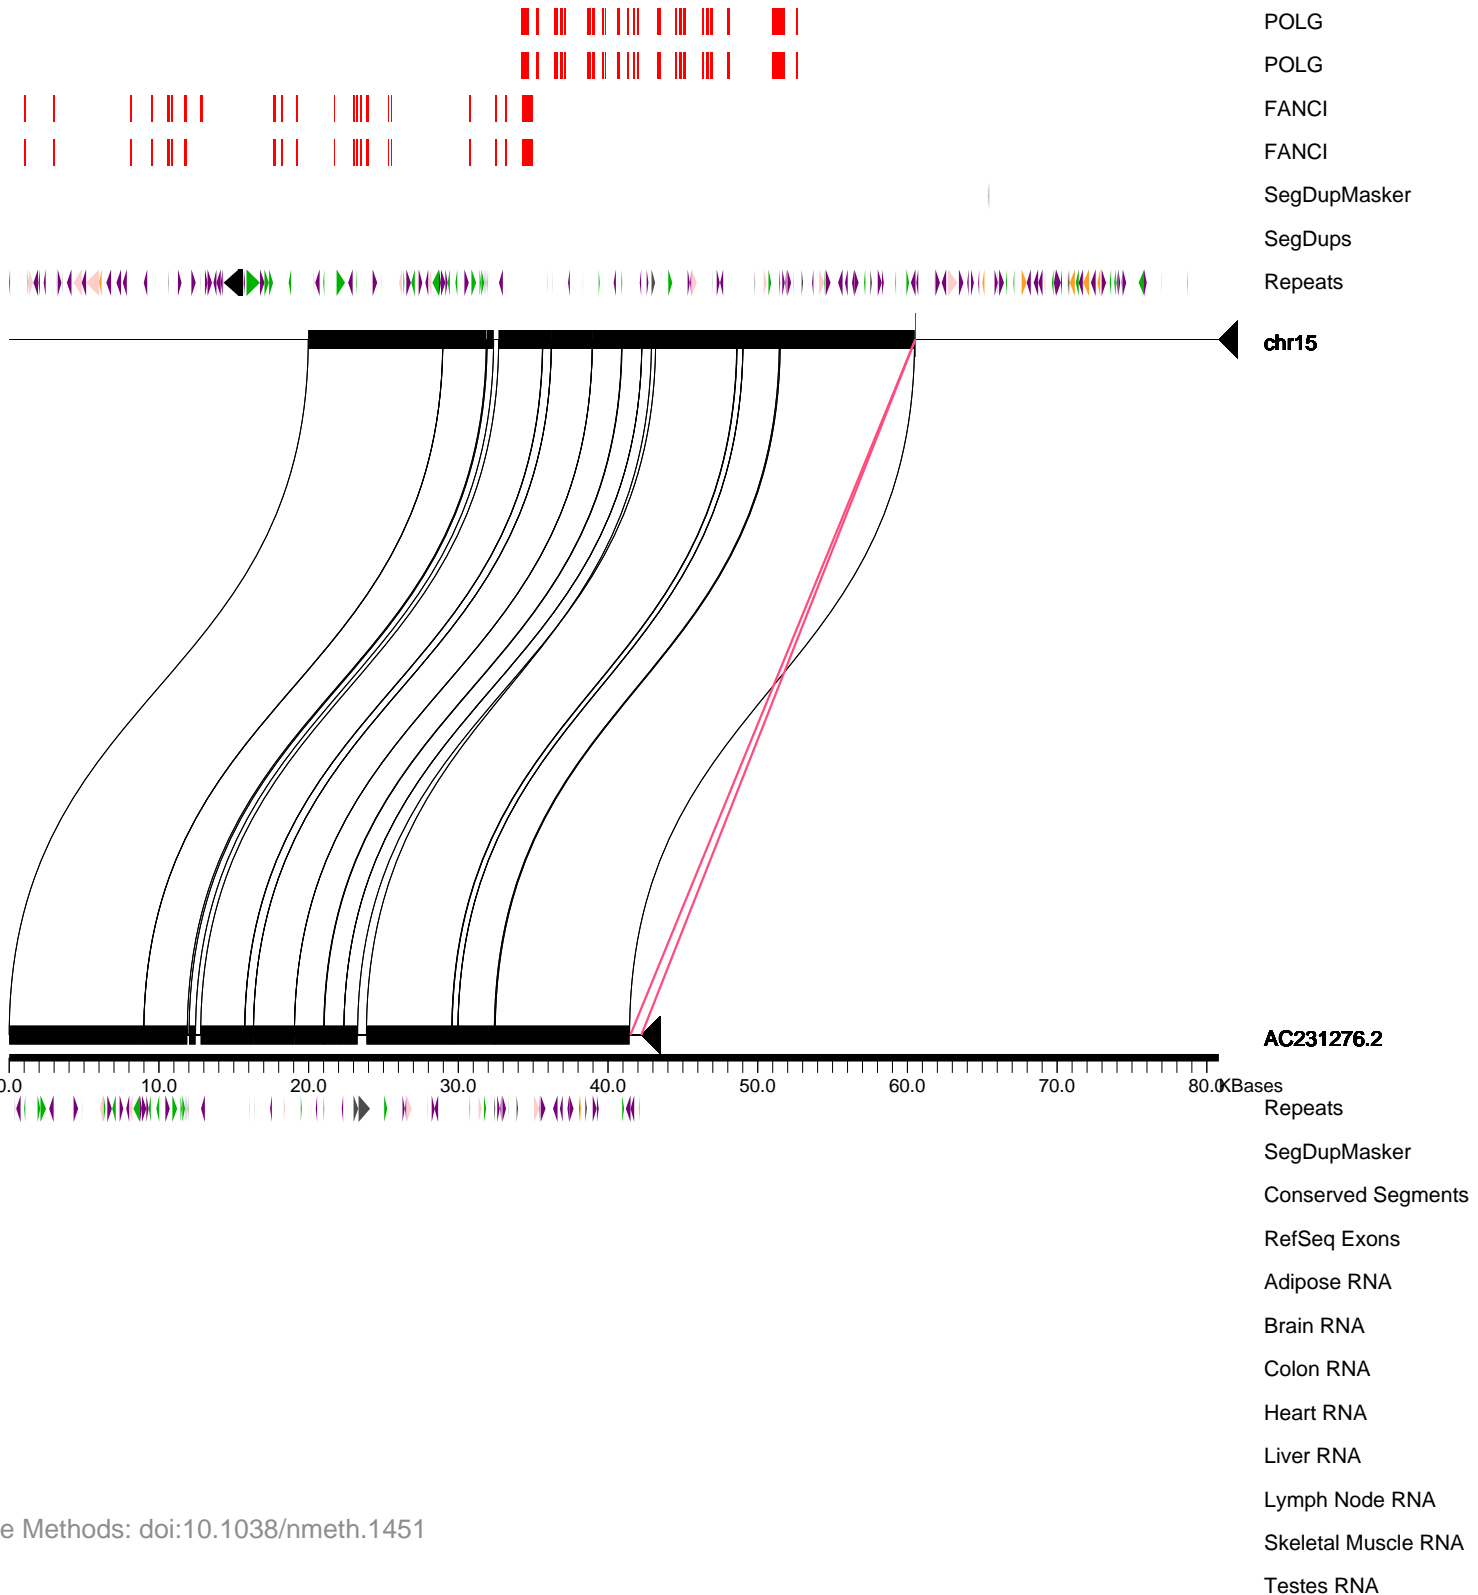

Clone file = AC231287.fa

Insertion Size: 798

Other Simple Repeat Low Complexity DNA LTR LINE SINE

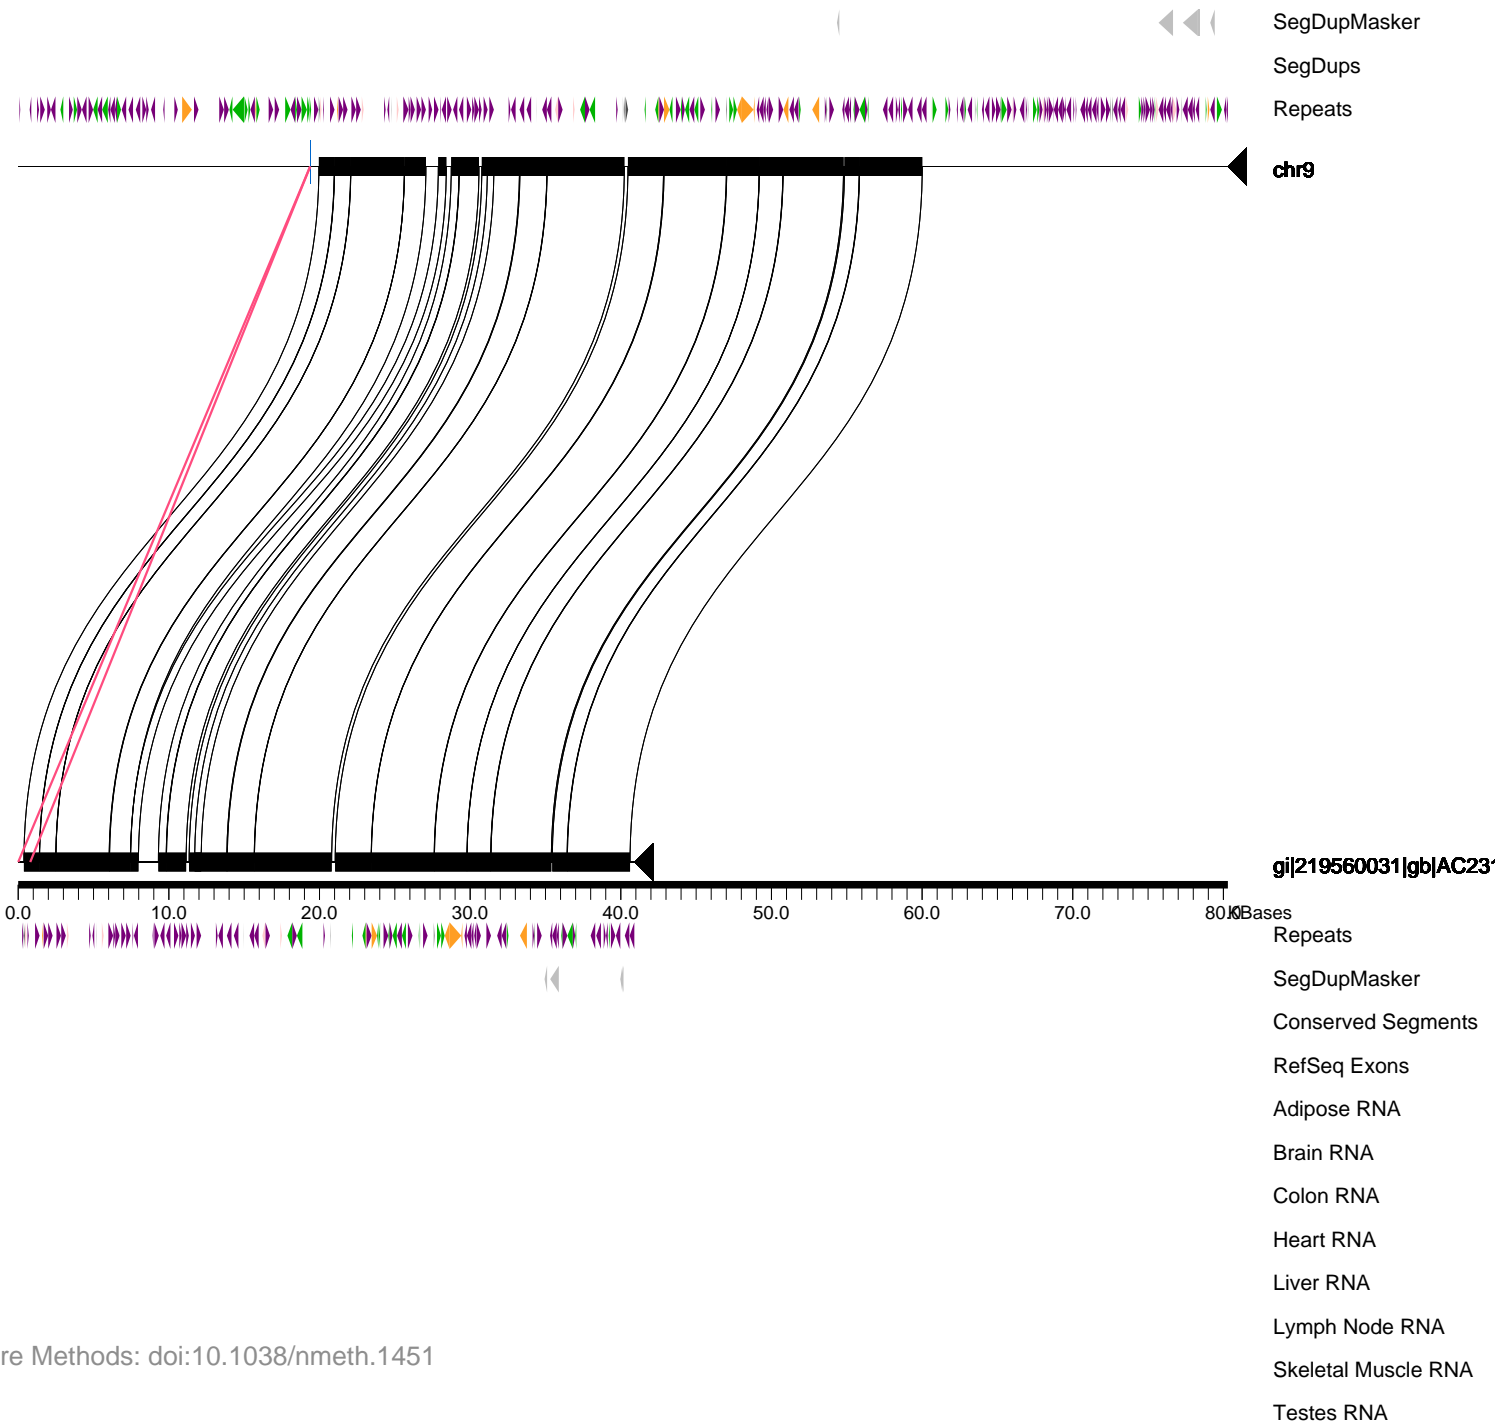

Clone file = AC231288.rc.fa

Insertion Size: 43954

Other Simple Repeat Low Complexity DNA LTR LINE SINE

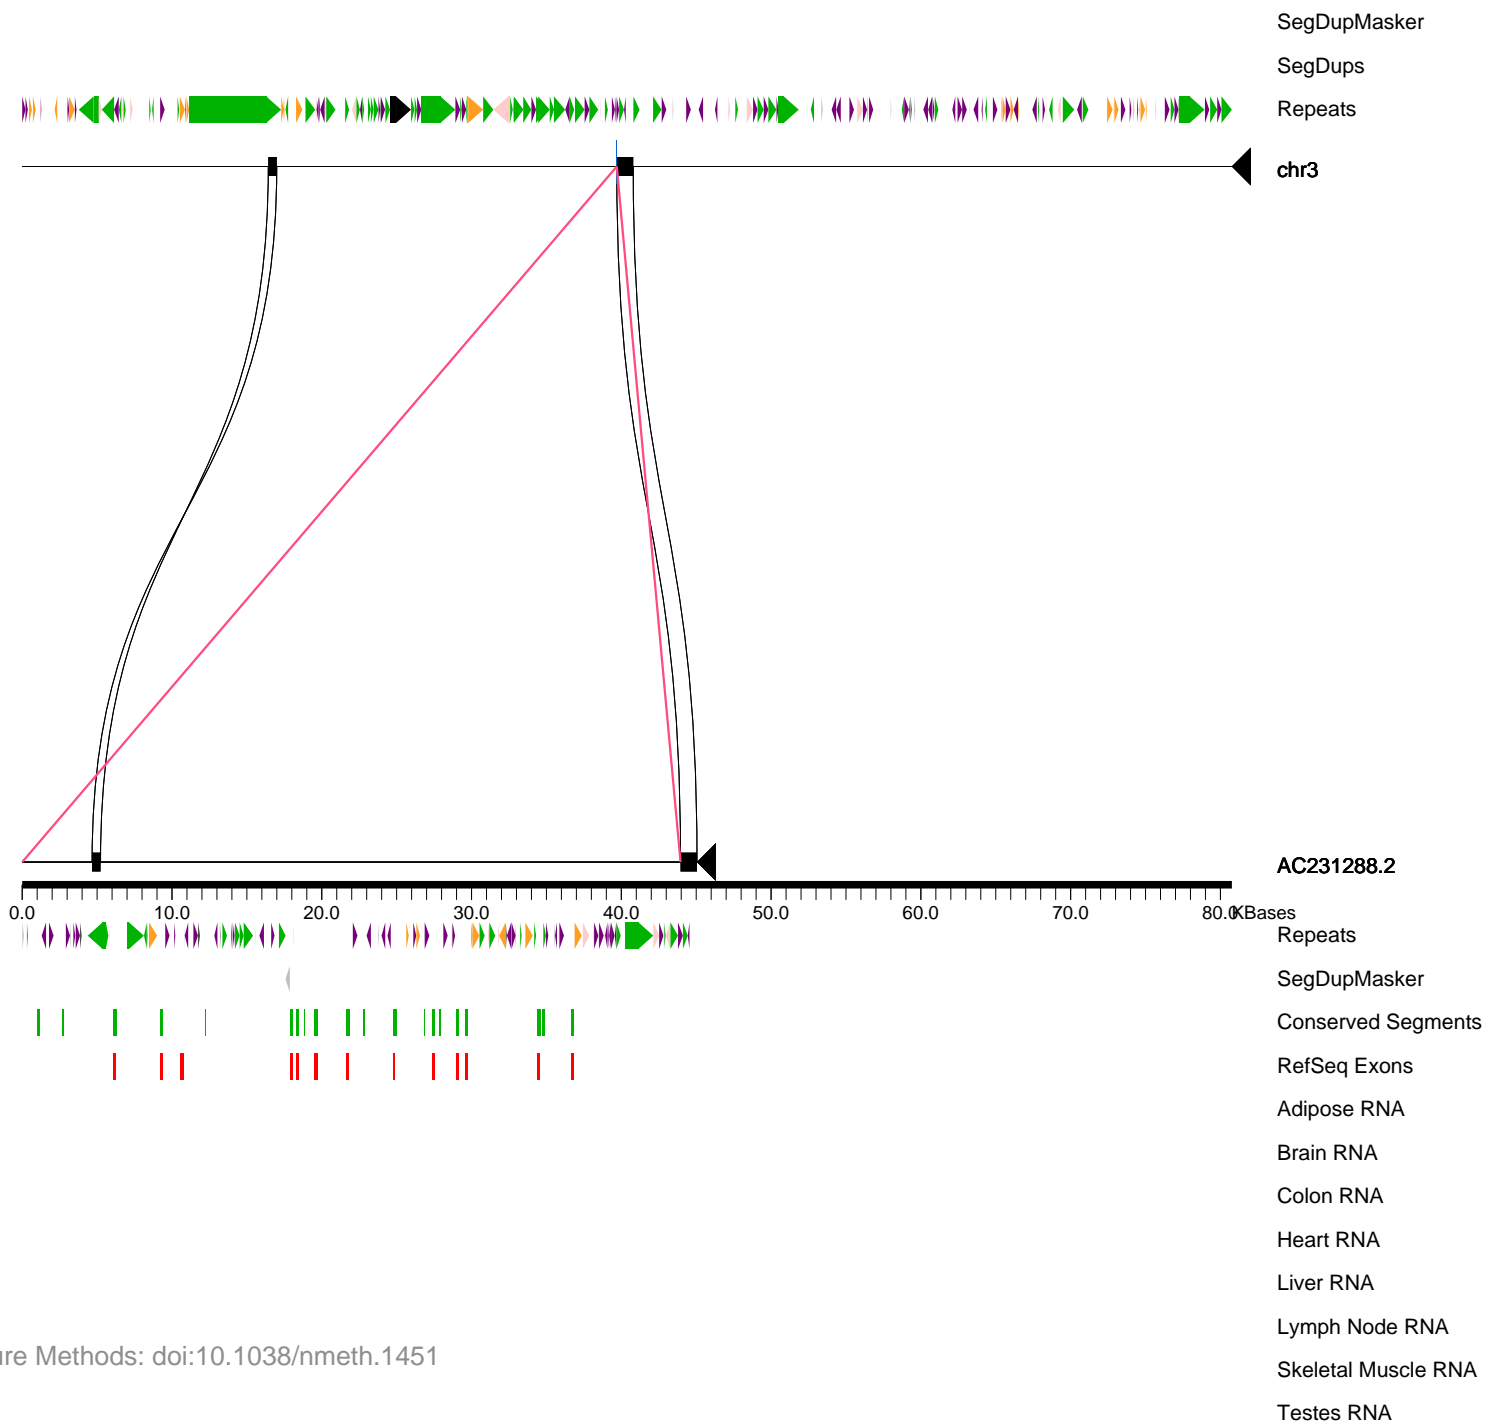

Clone file = AC231414.rc.fa

Insertion Size: 24063

Other Simple Repeat Low Complexity DNA LTR LINE SINE

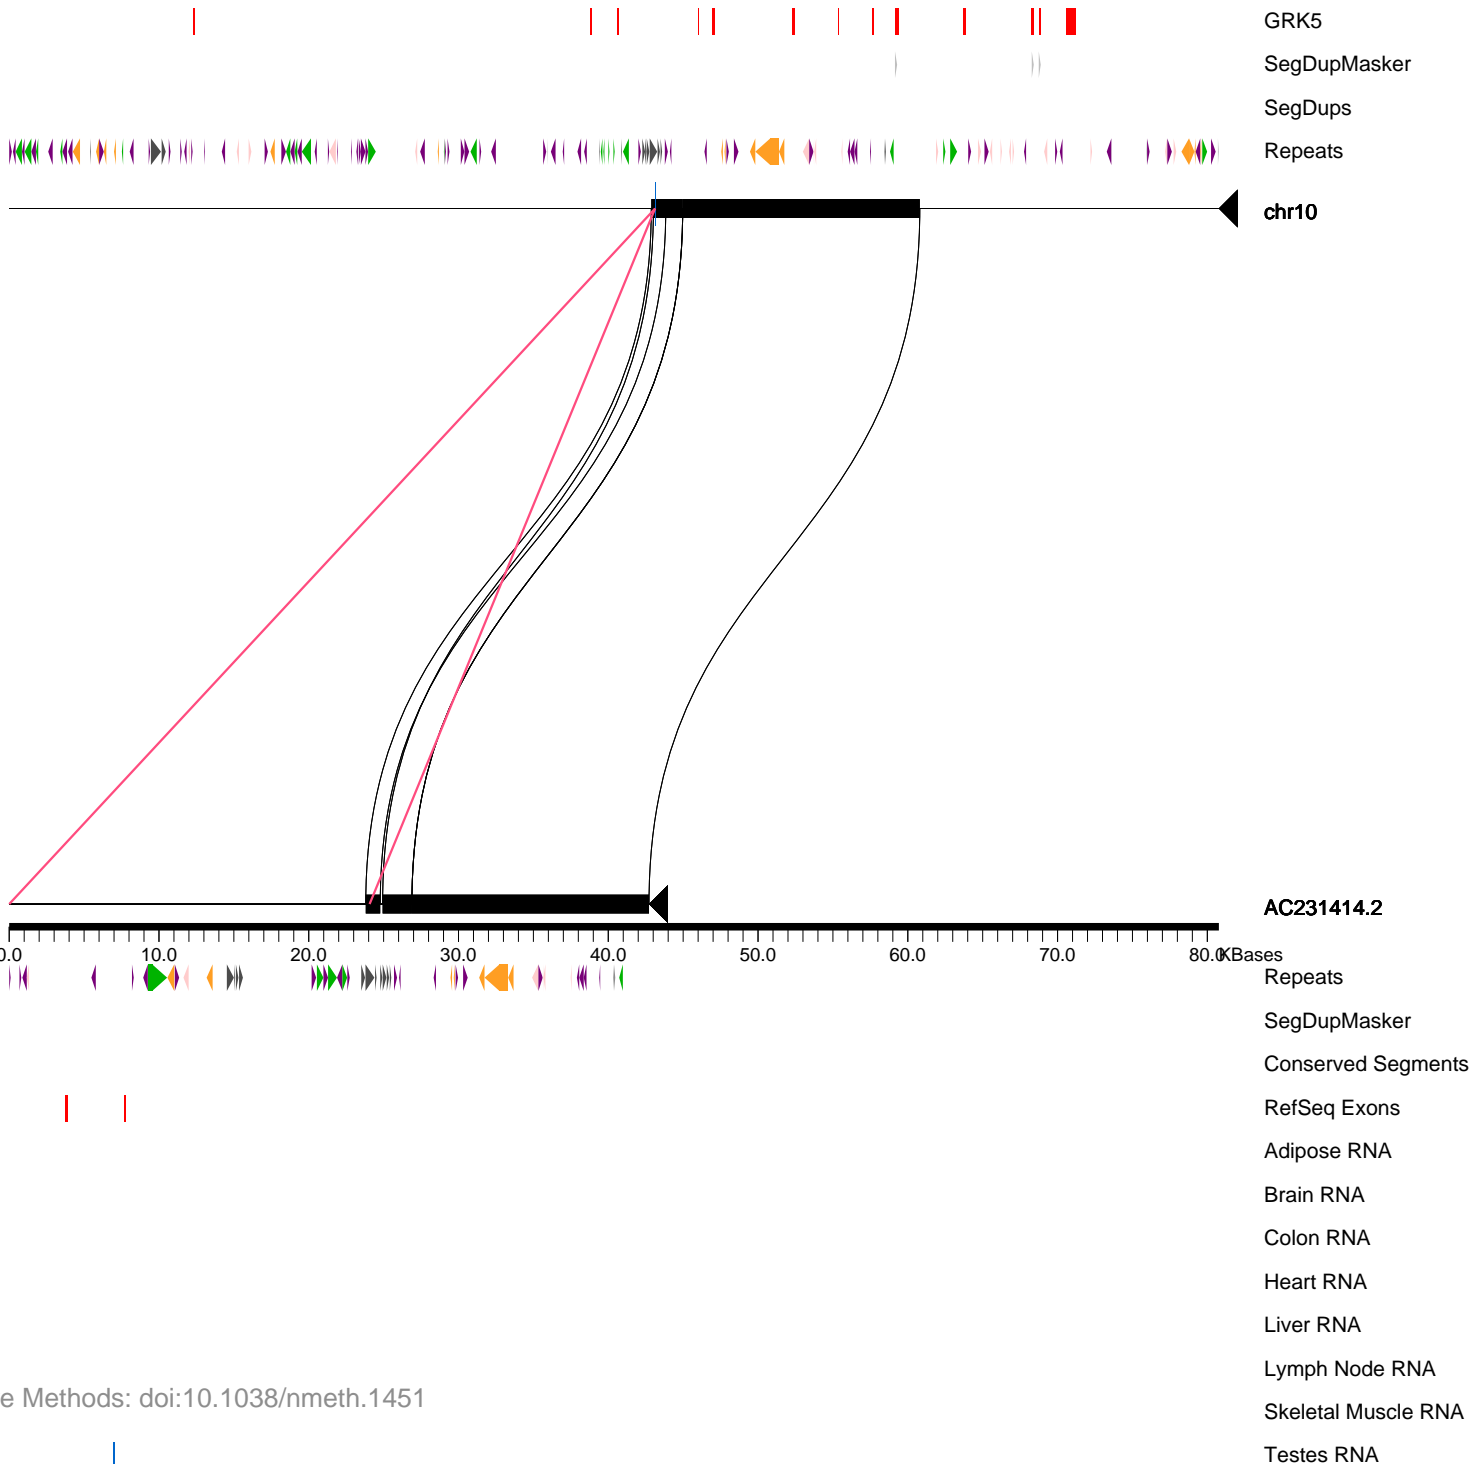

Clone file = AC231536.fa

Insertion Size: 4306

Other Simple Repeat Low Complexity DNA LTR LINE SINE

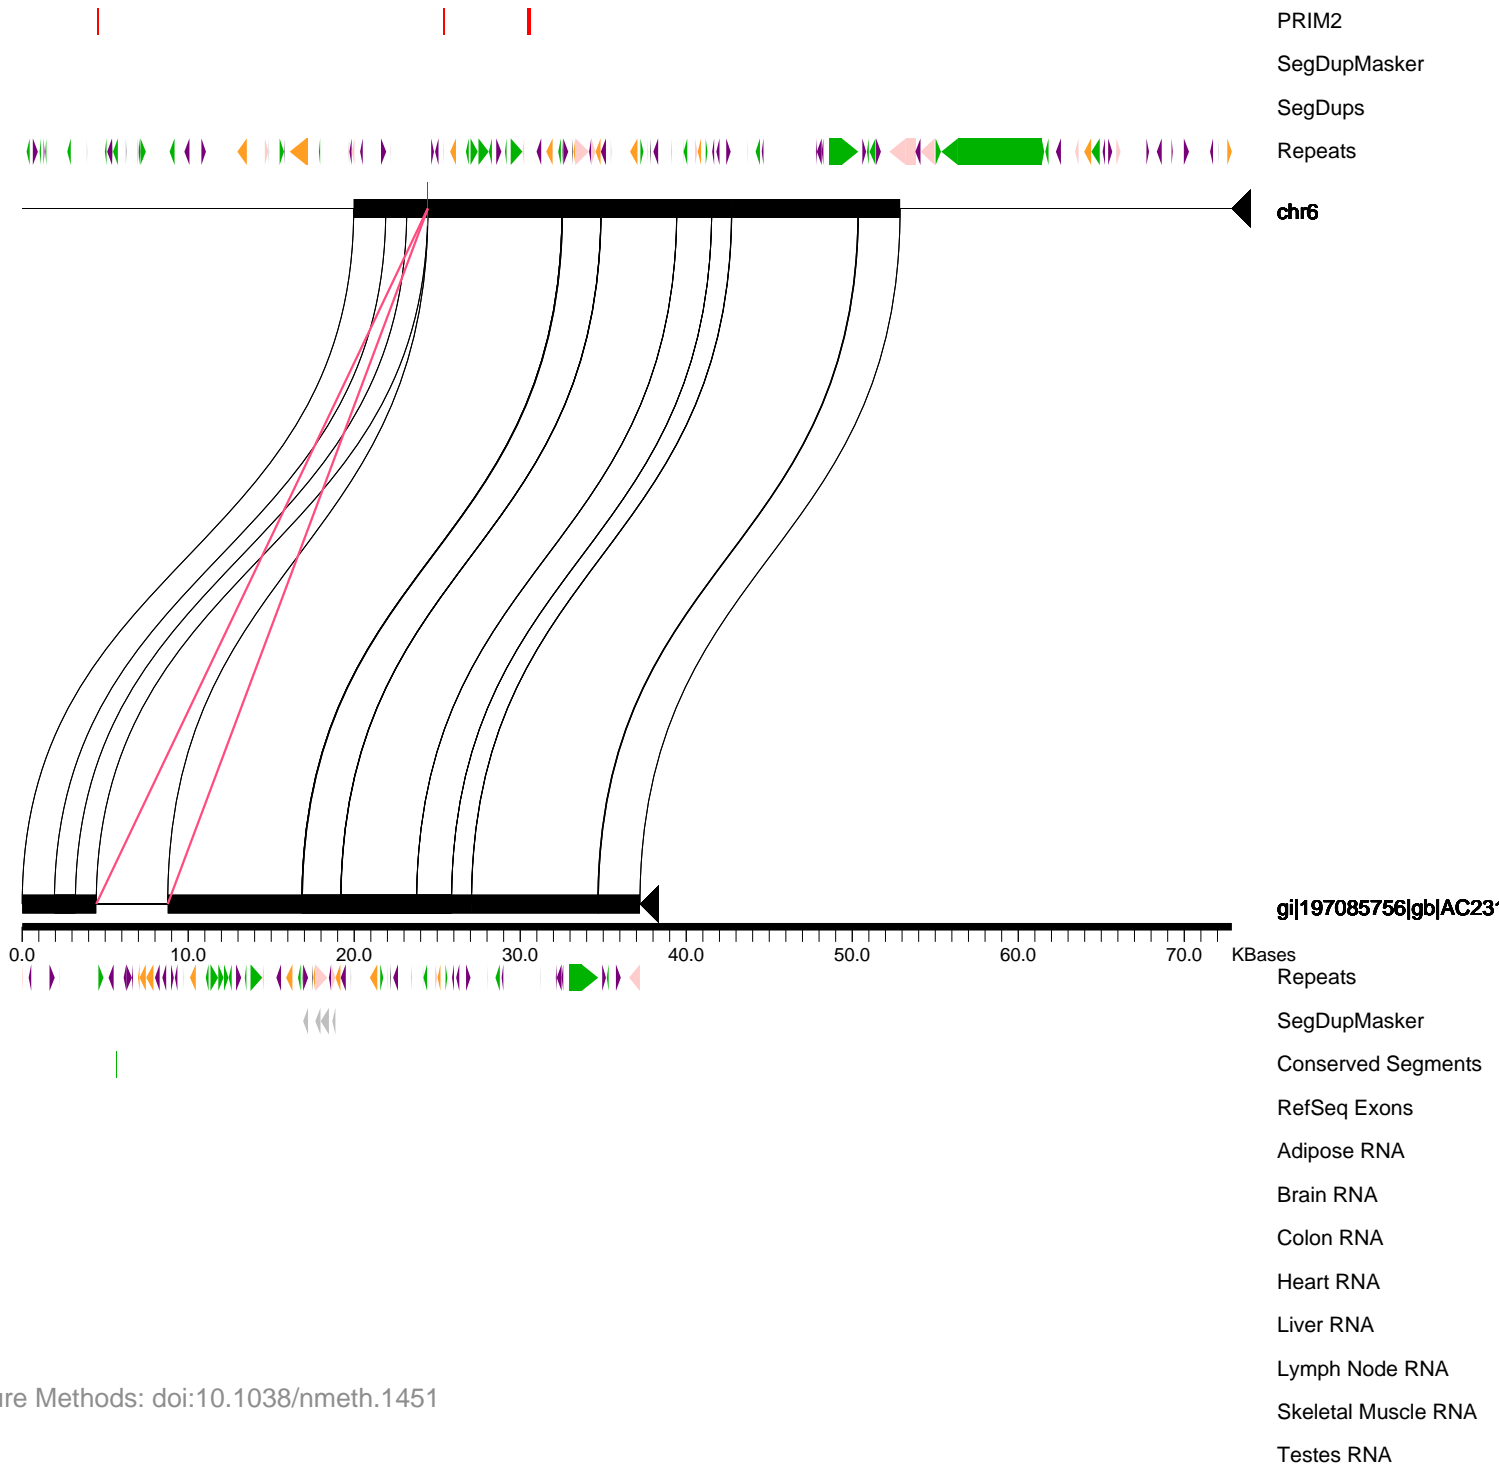

Clone file = AC231540.rc.fa

Insertion Size: 2633

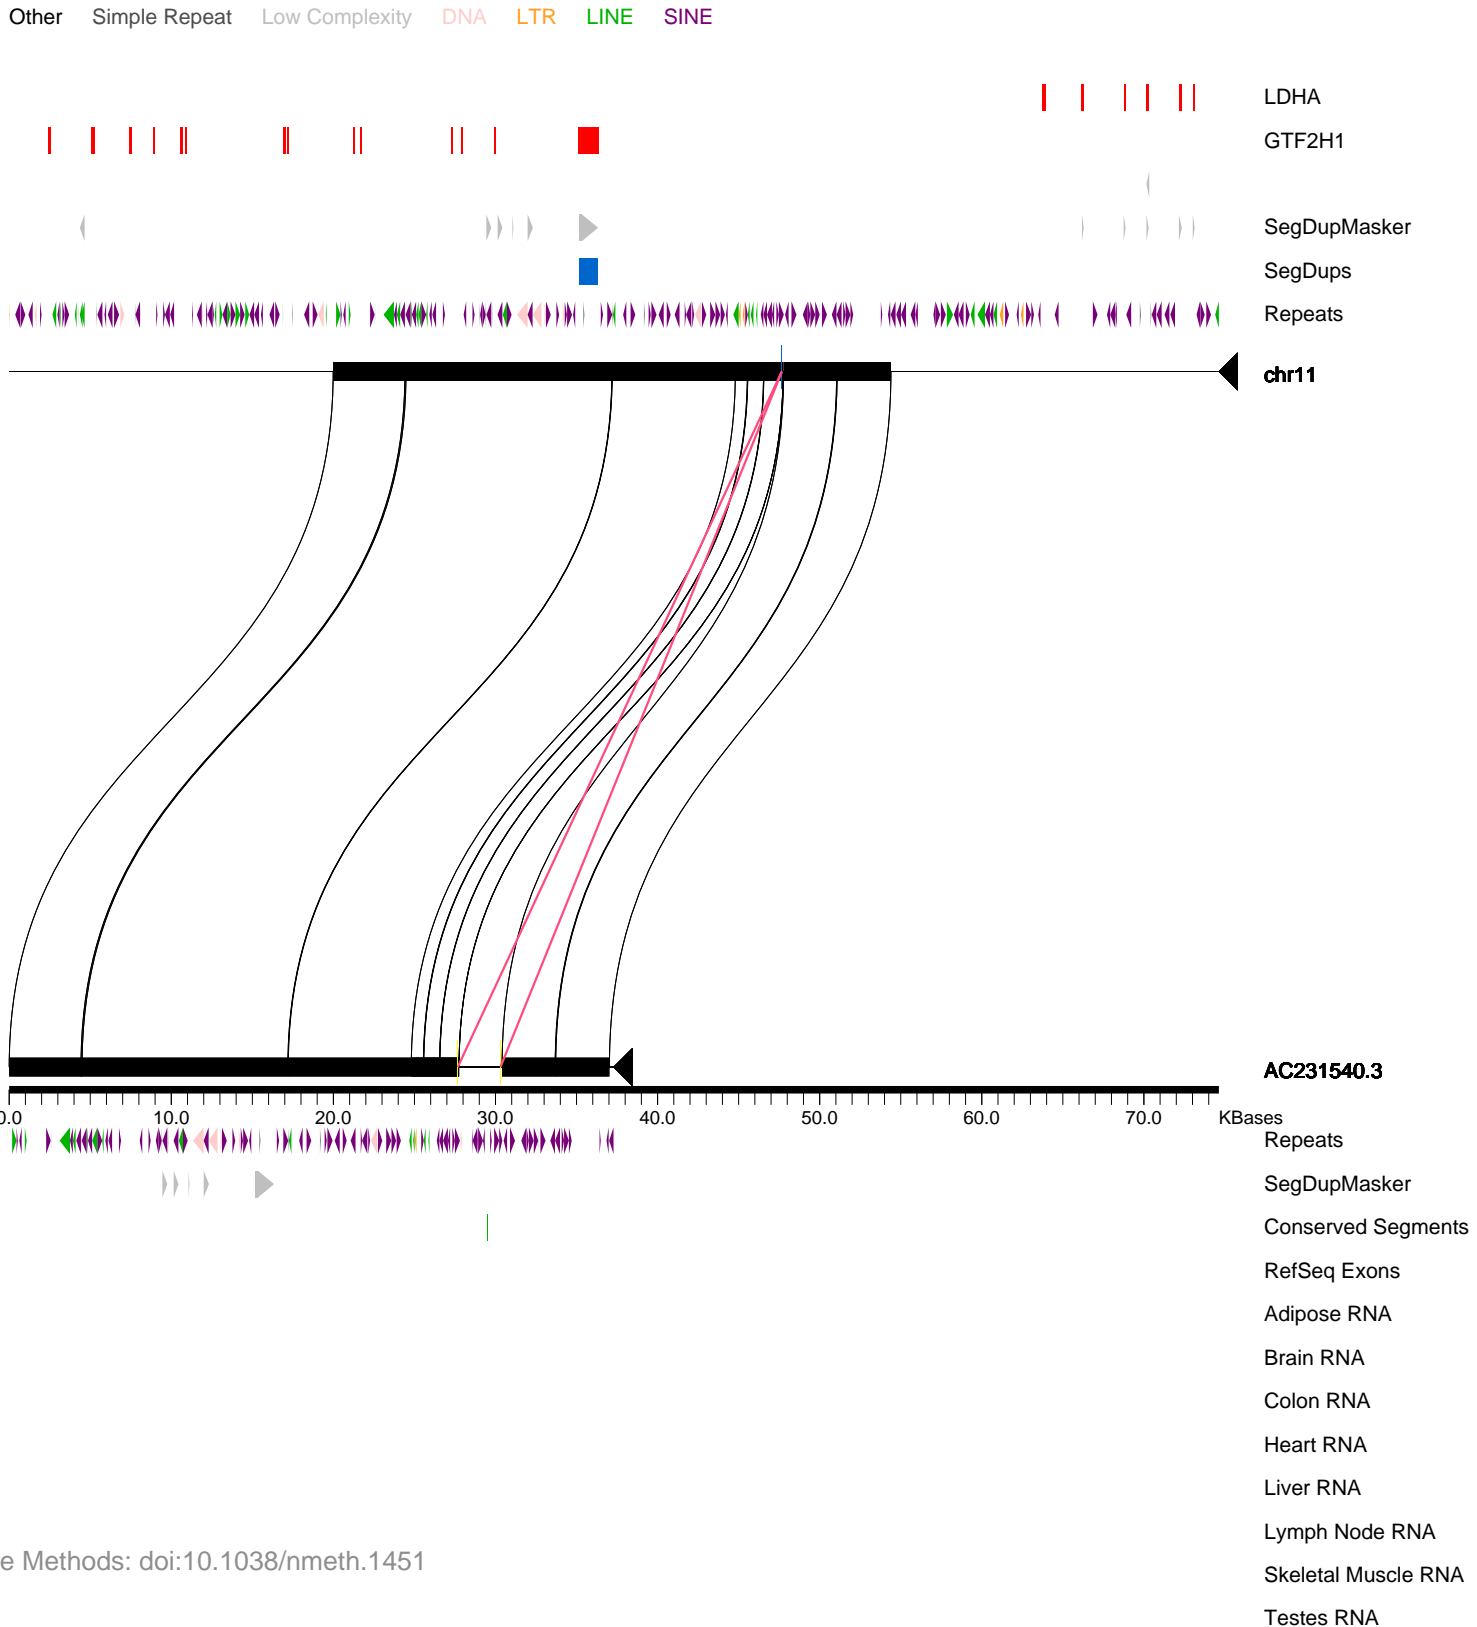



Clone file = AC231646.rc.fa

Insertion Size: 16754

Other Simple Repeat Low Complexity DNA LTR LINE SINE

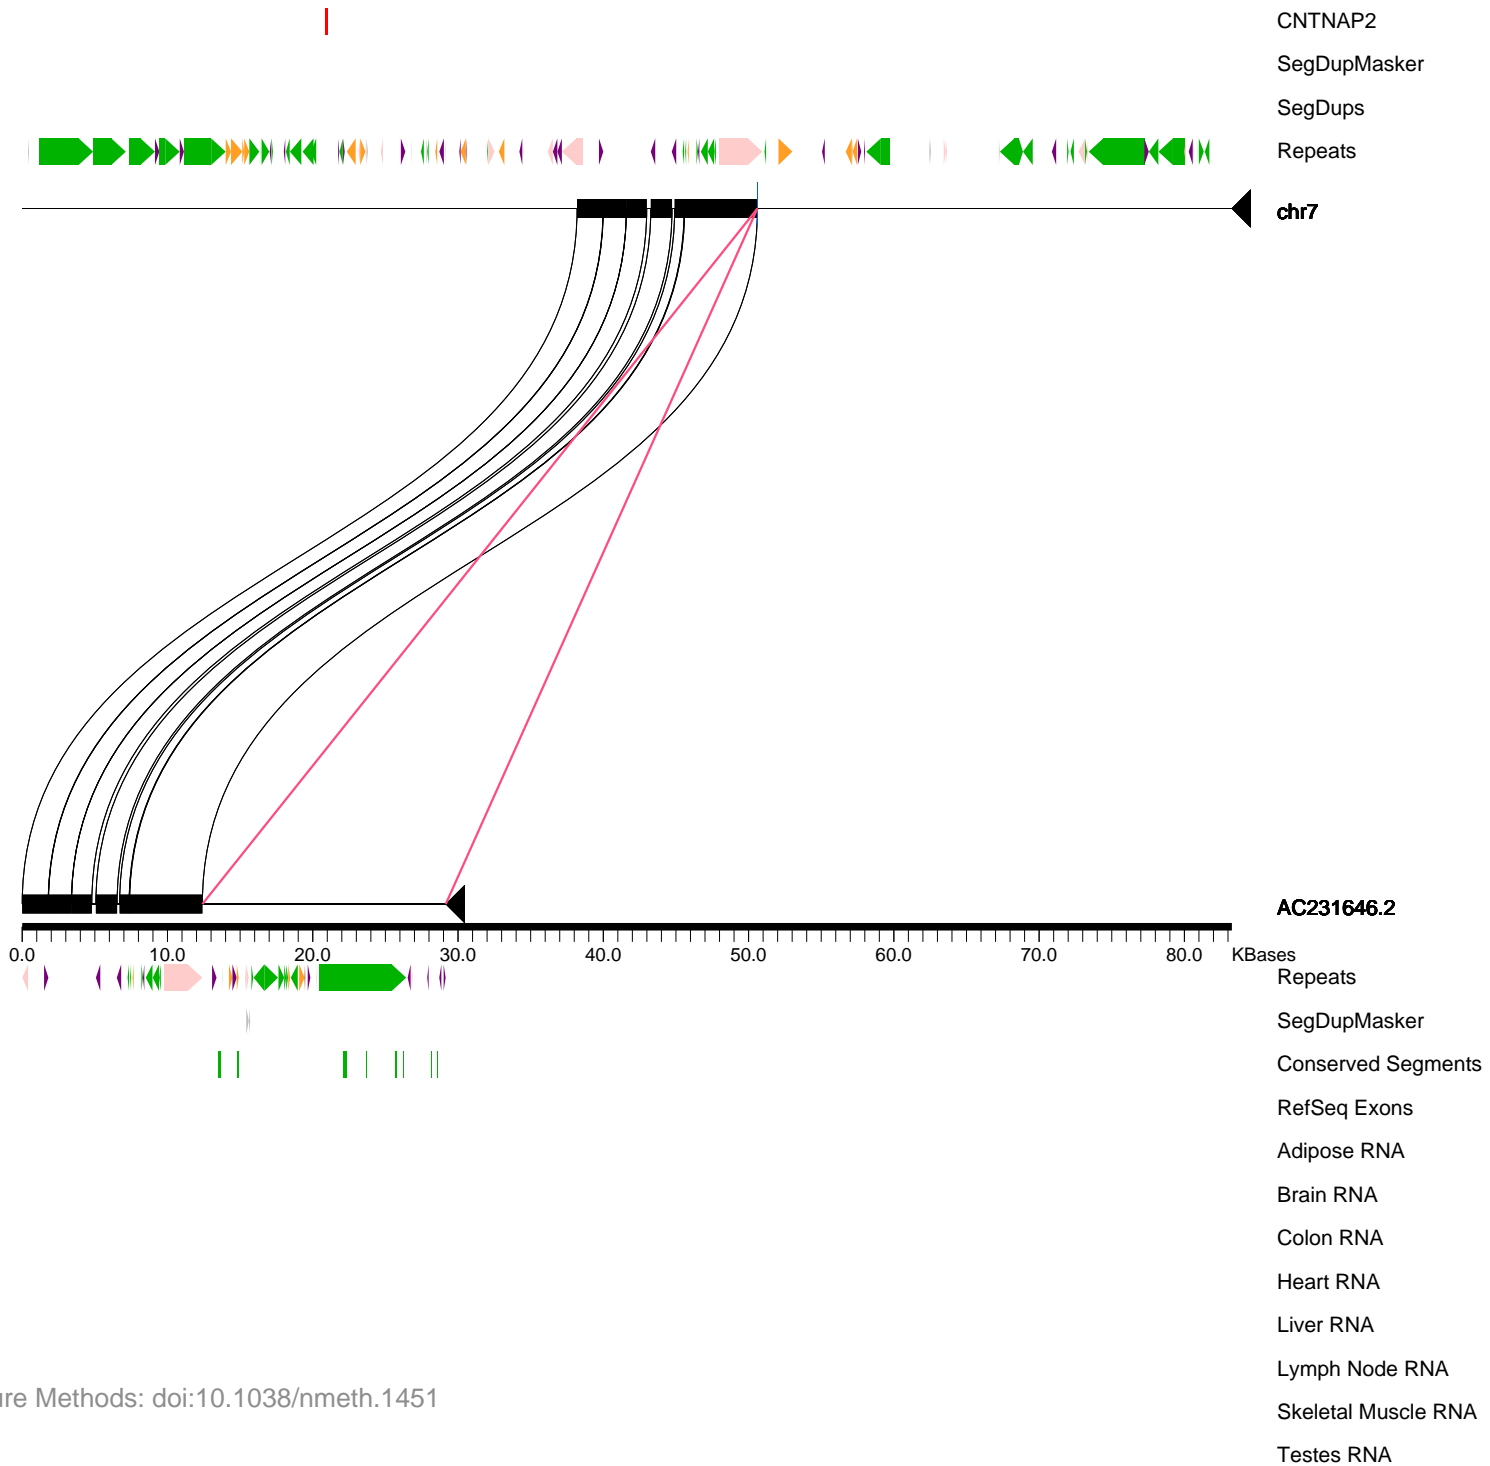

# Clone file = AC231649.fa

Other Simple Repeat Low Complexity DNA LTR LINE SINE

Insertion Size: 1052

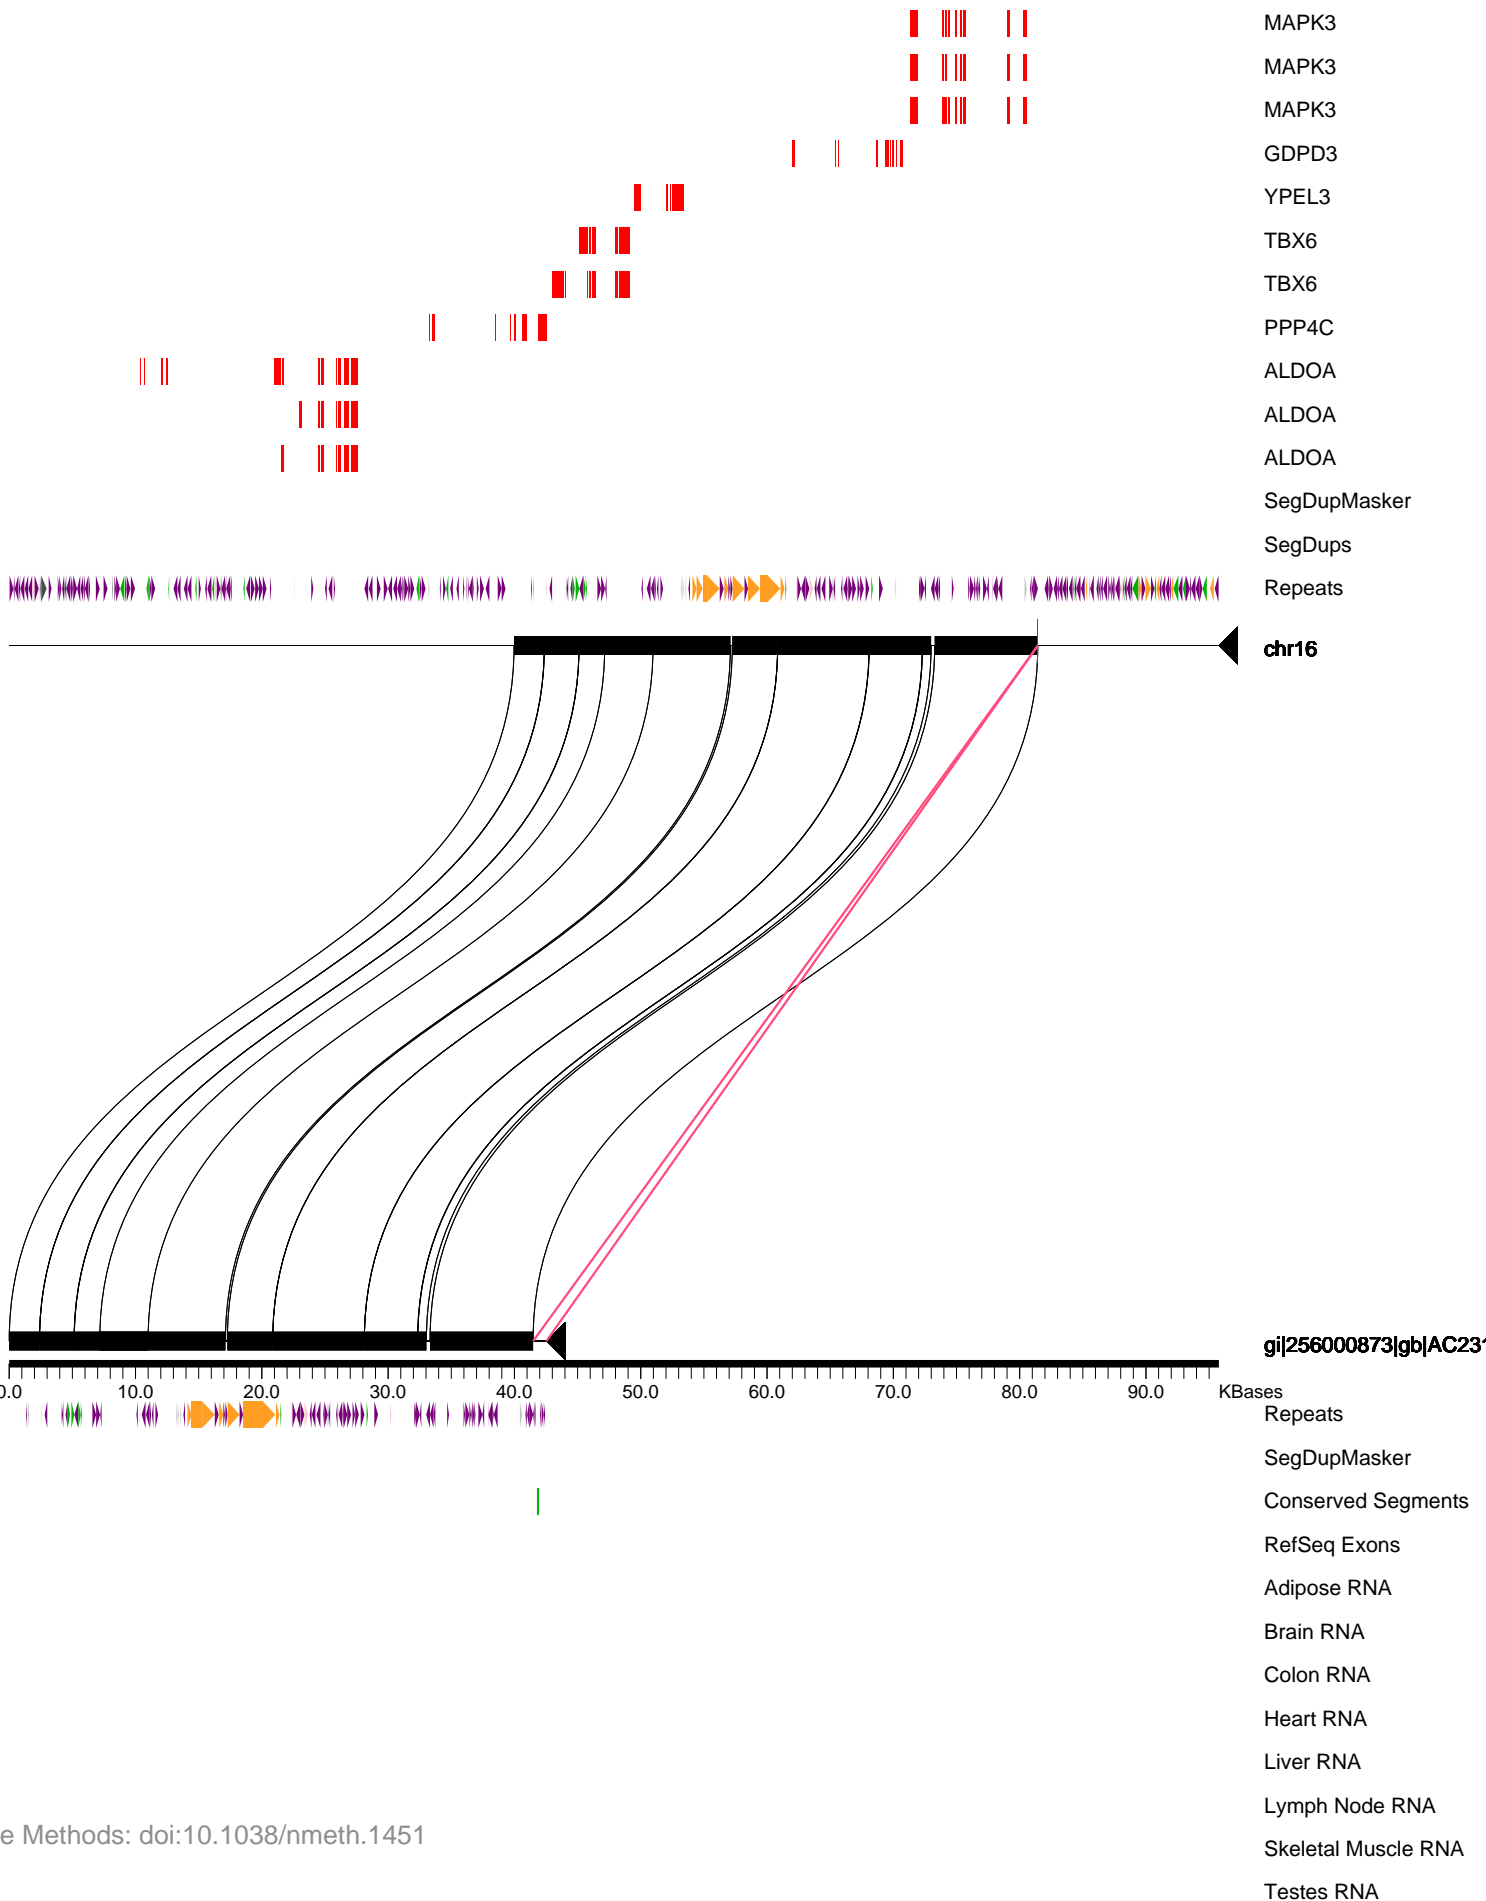

Clone file = AC231780.rc.fa

Insertion Size: 23257

Other Simple Repeat Low Complexity DNA LTR LINE SINE

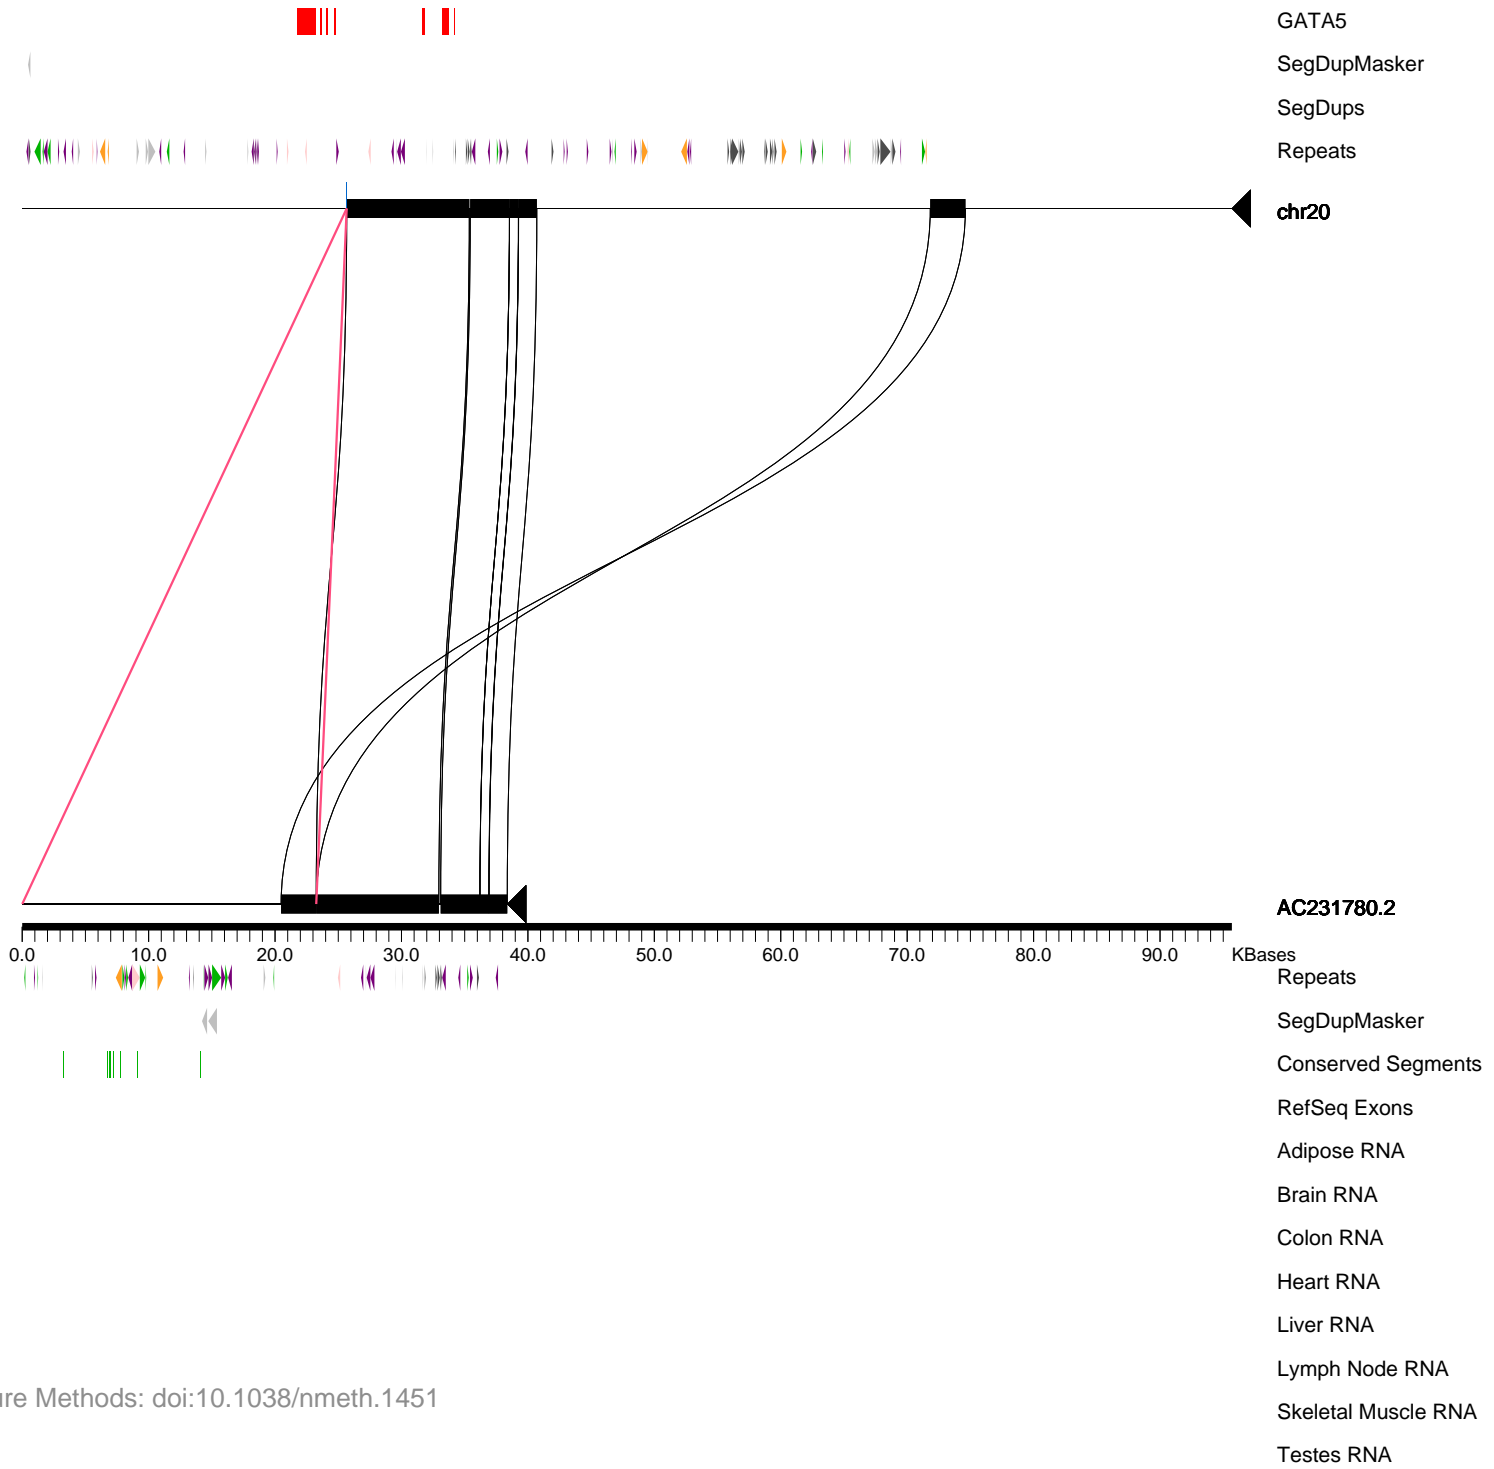

Clone file = AC231953.fa

Insertion Size: 1925

Other Simple Repeat Low Complexity DNA LTR LINE SINE

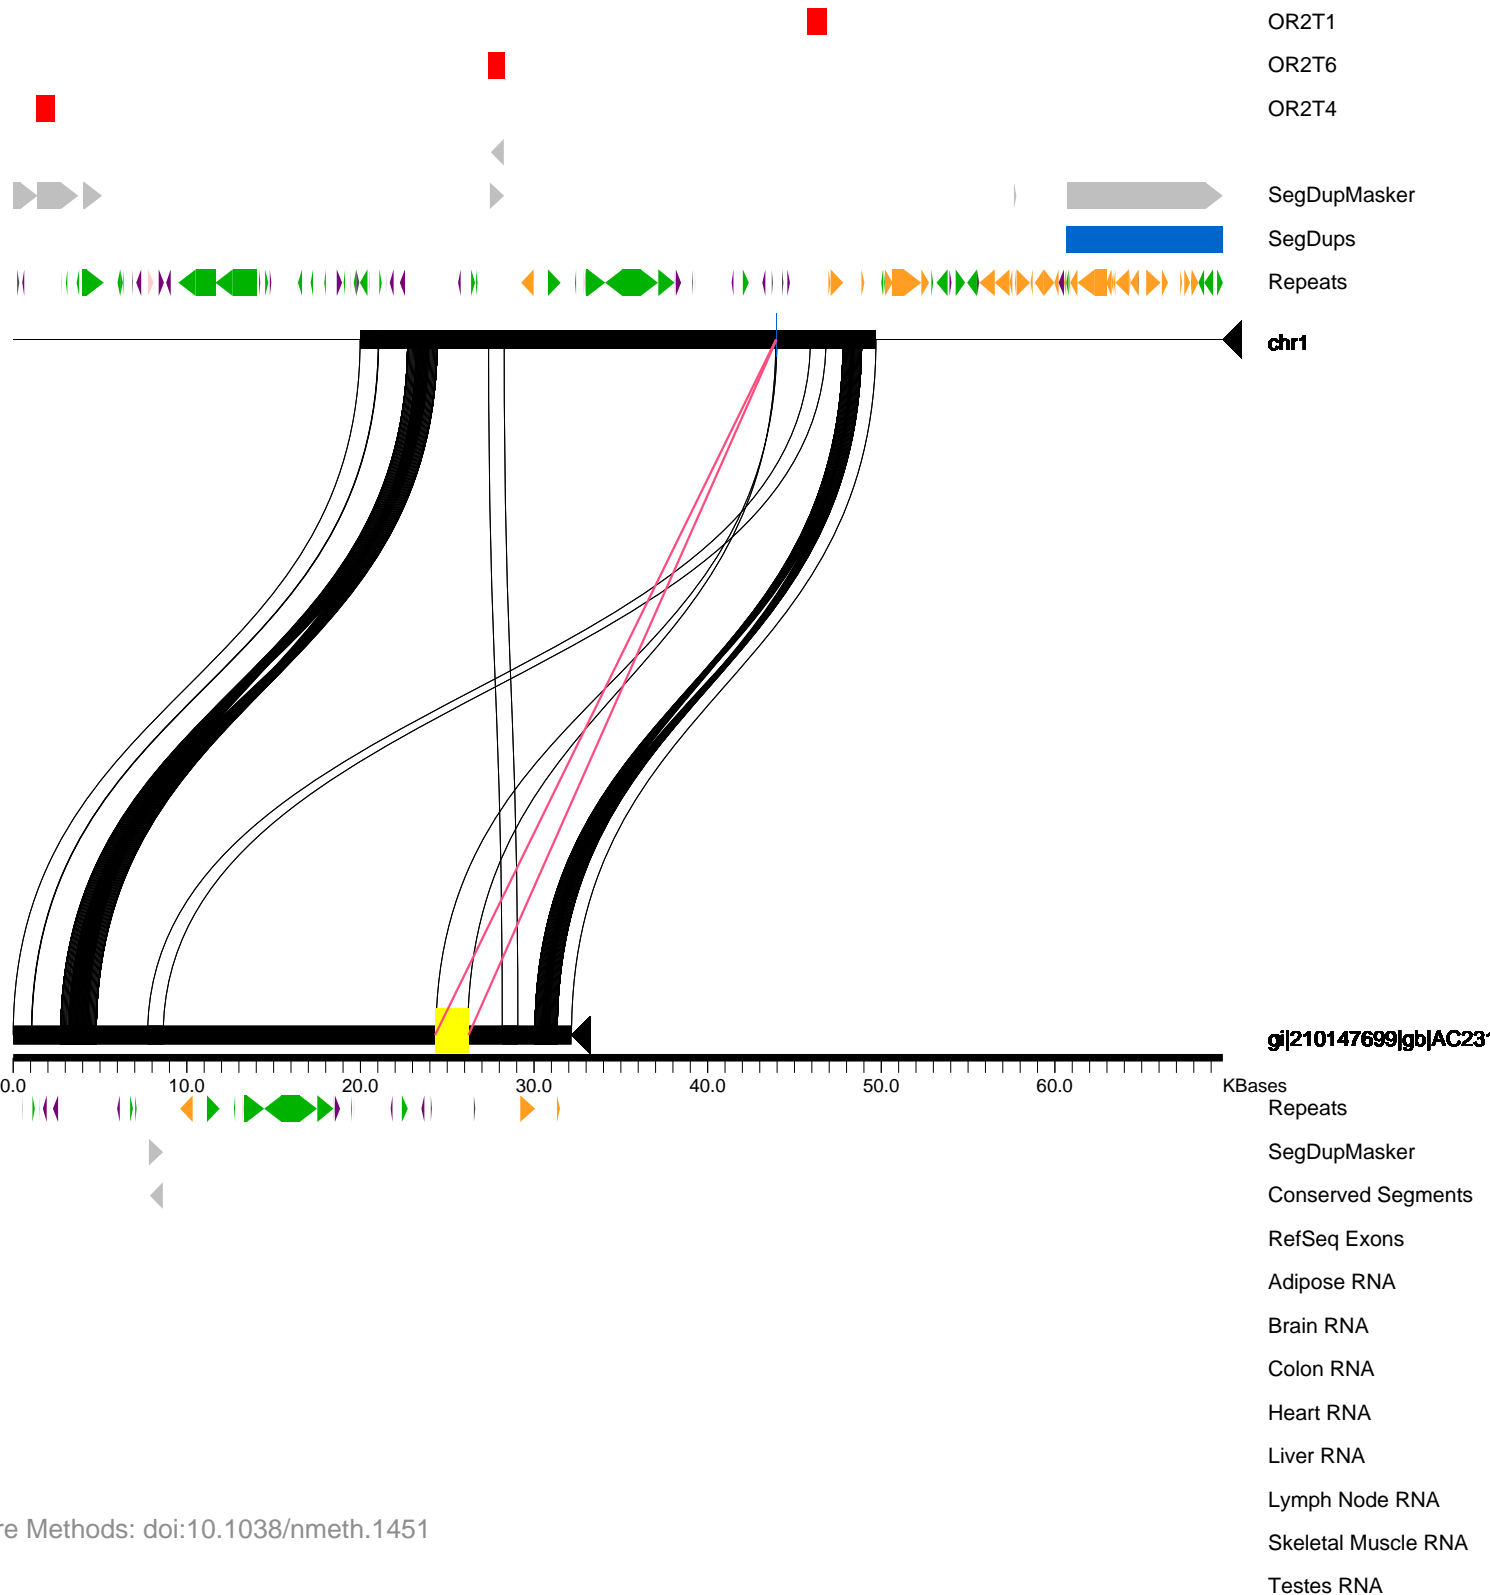

Clone file = AC231958.fa

Insertion Size: 13141

Other Simple Repeat Low Complexity DNA LTR LINE SINE

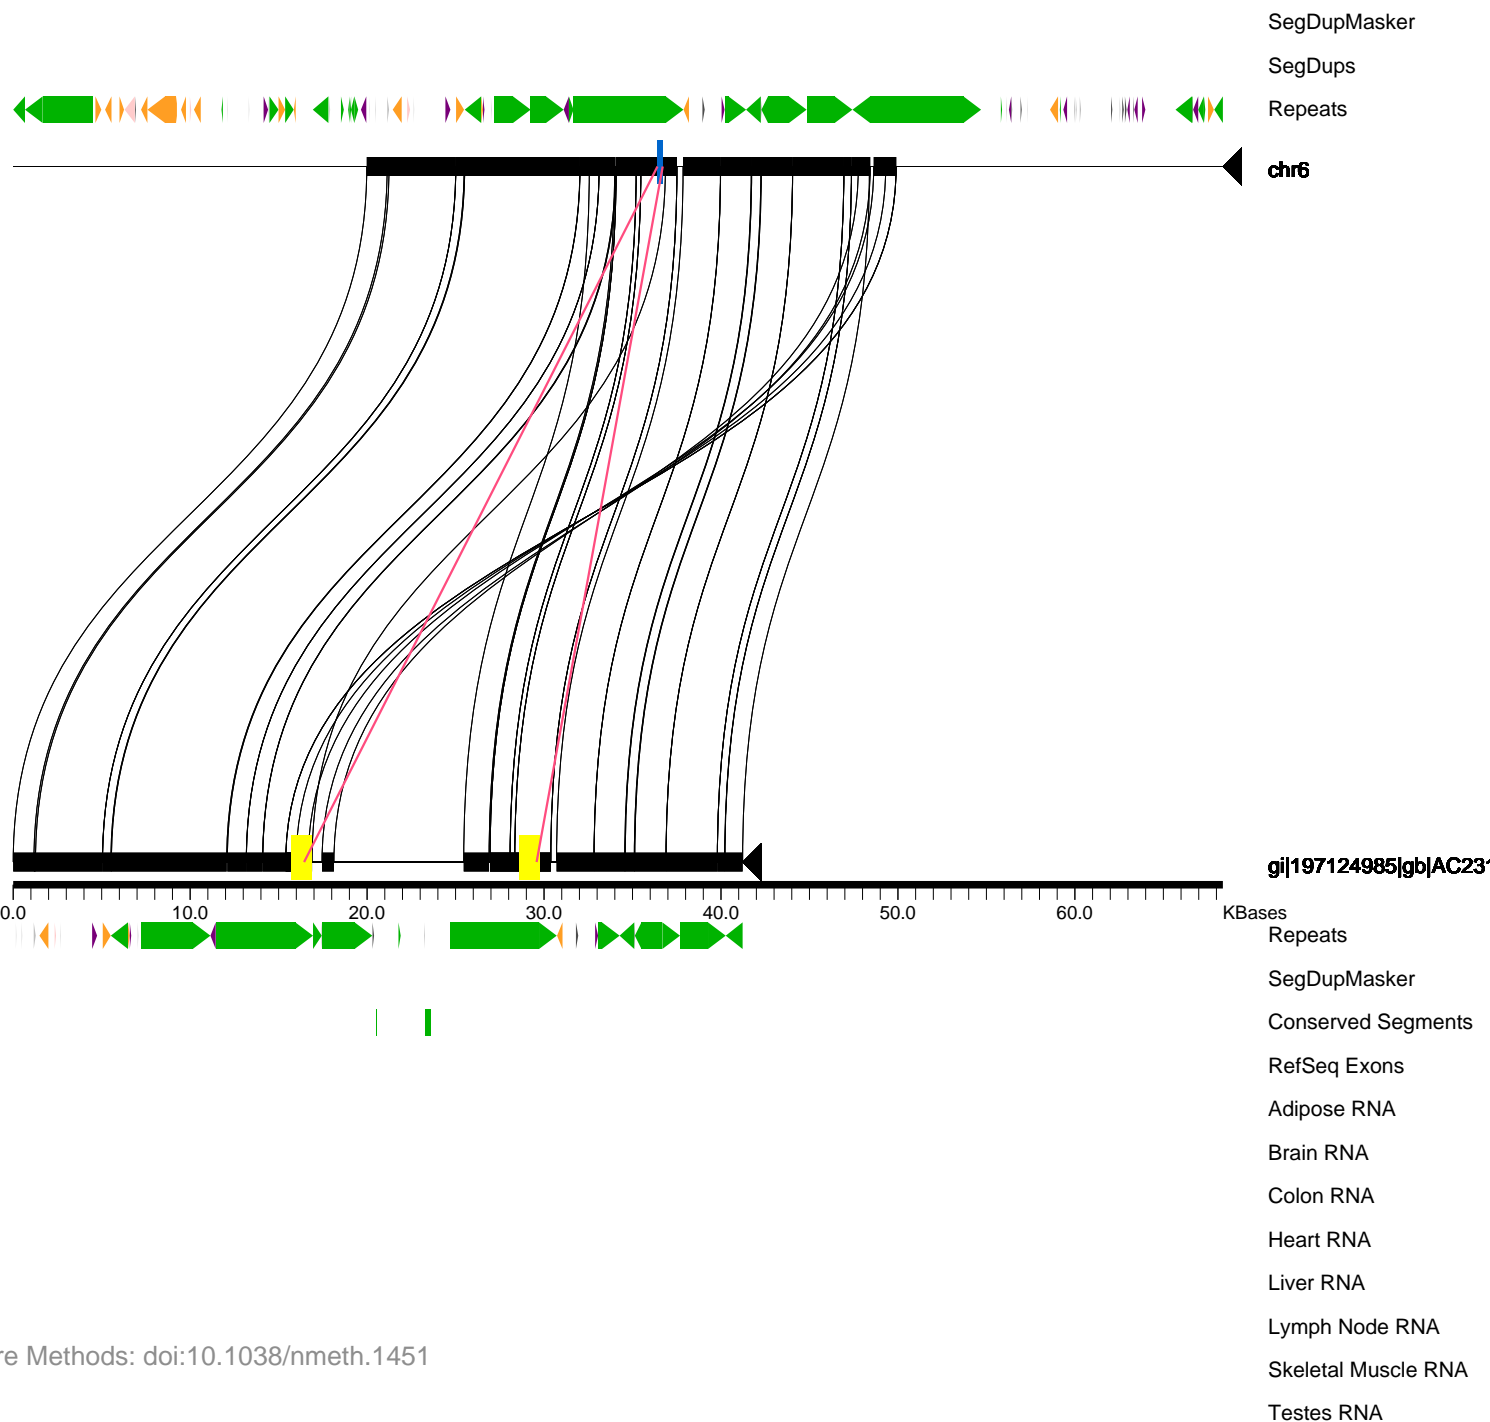

Clone file = AC231962.fa

Insertion Size: 4316

Other Simple Repeat Low Complexity DNA LTR LINE SINE

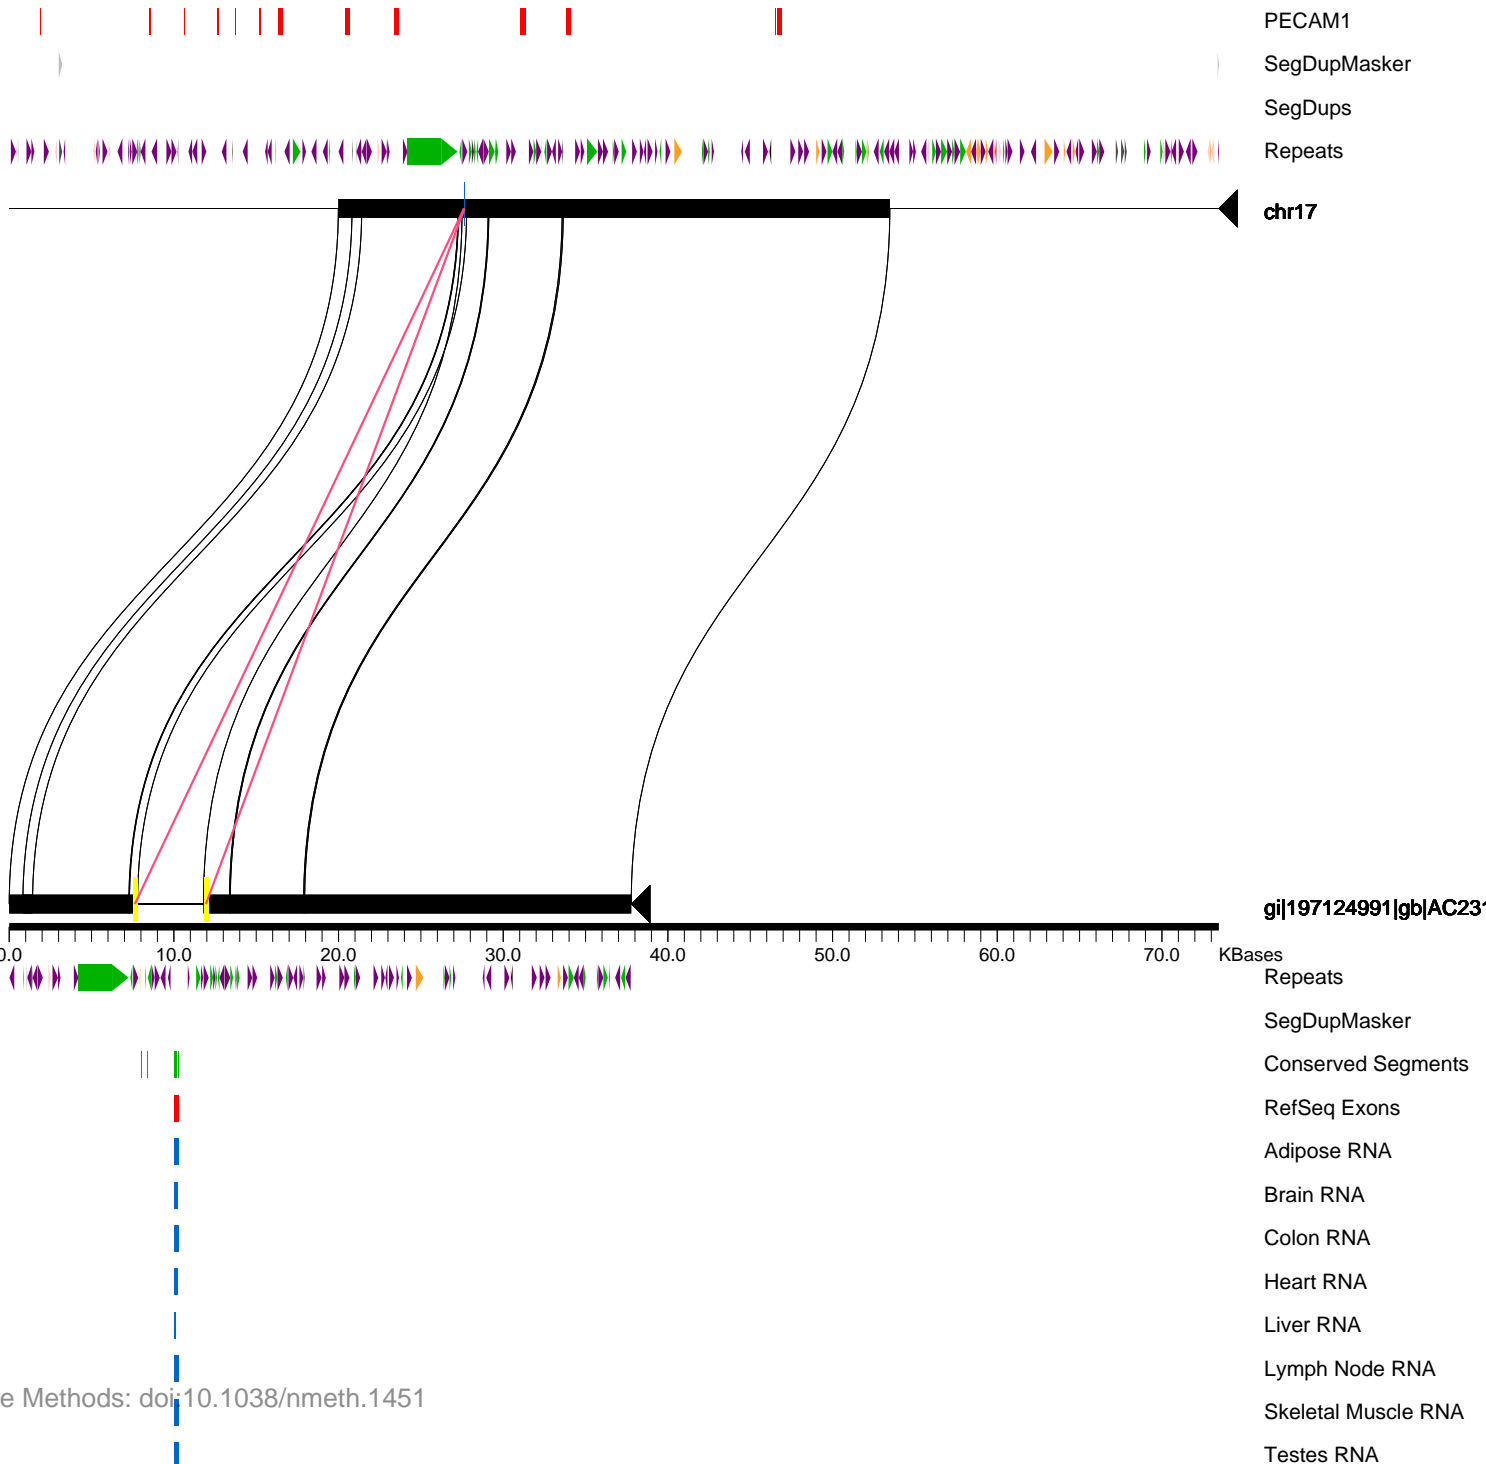

Clone file = AC231964.rc.fa

Insertion Size: 4571

Other Simple Repeat Low Complexity DNA LTR LINE SINE

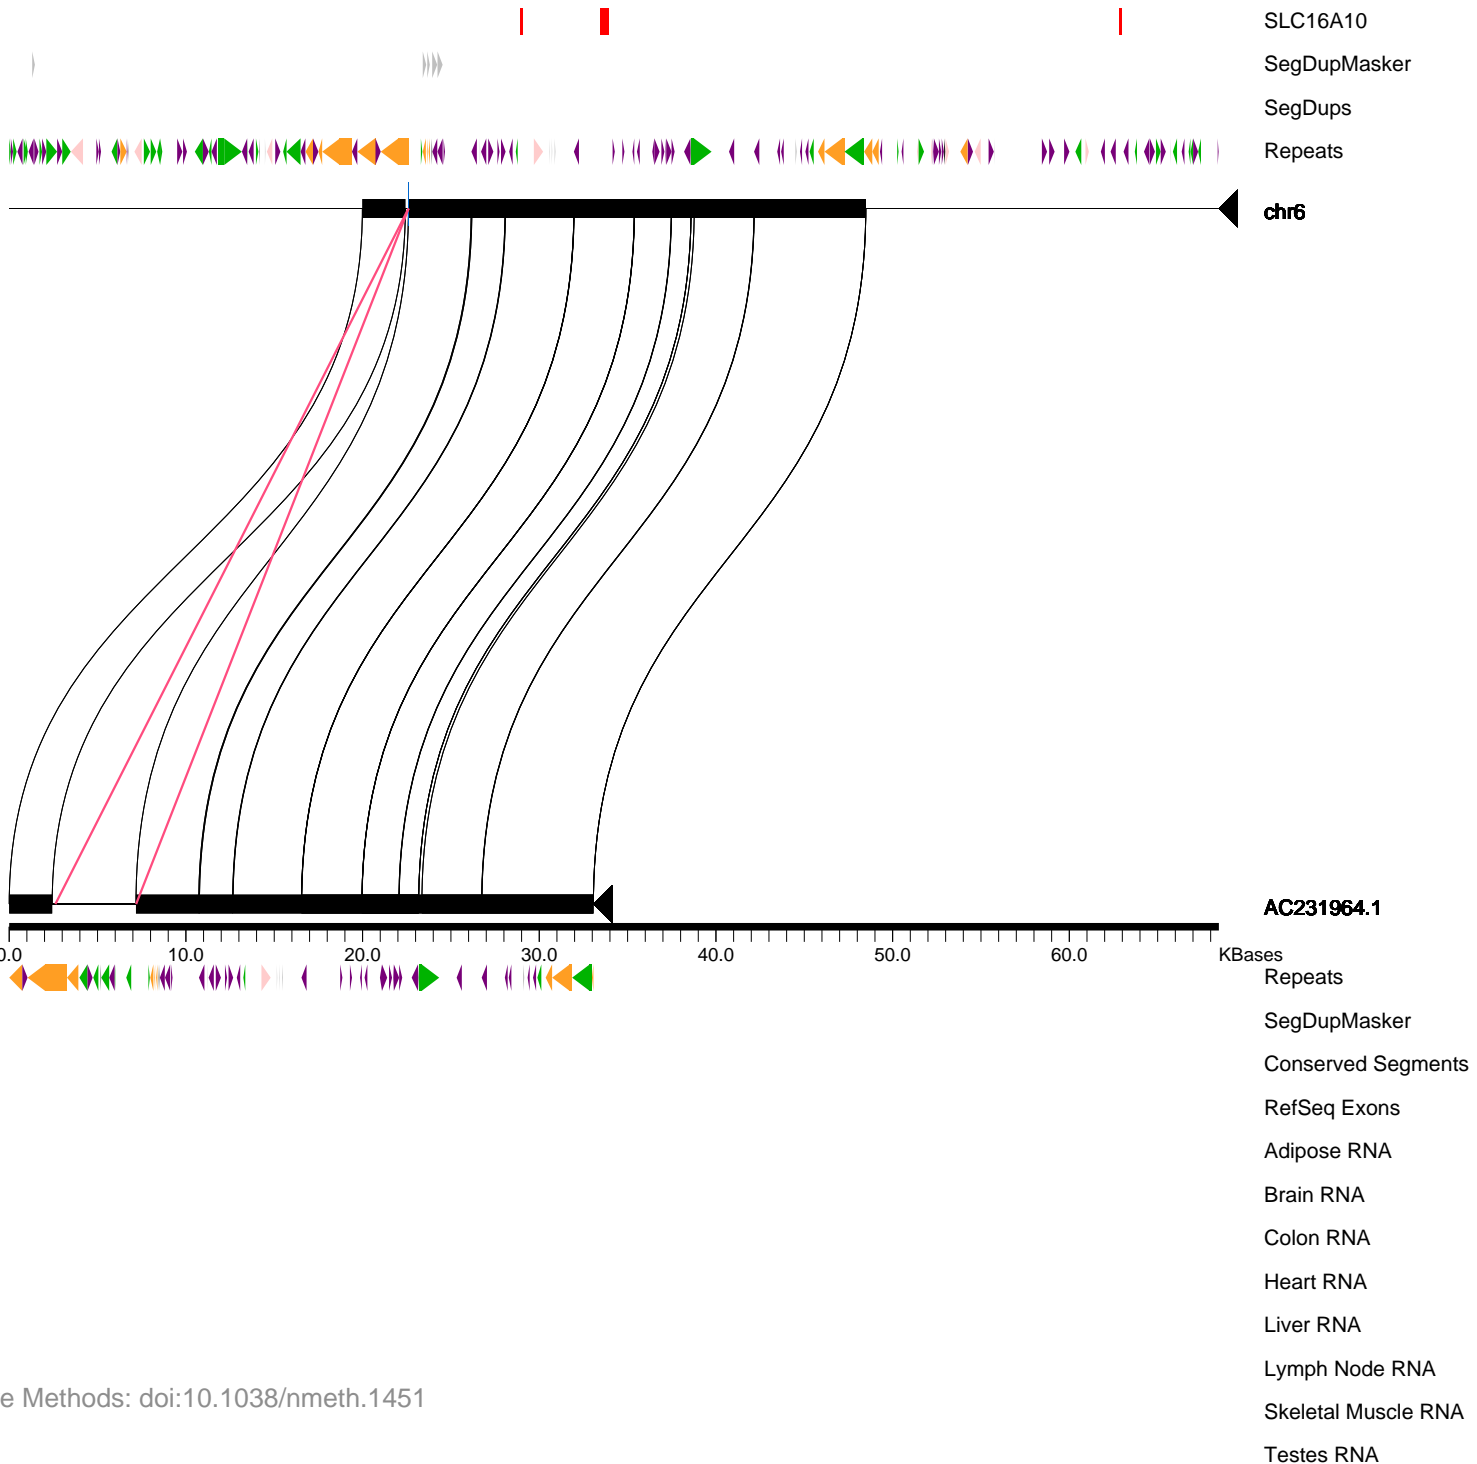

Clone file = AC231980.fa

Insertion Size: 3638

Other Simple Repeat Low Complexity DNA LTR LINE SINE

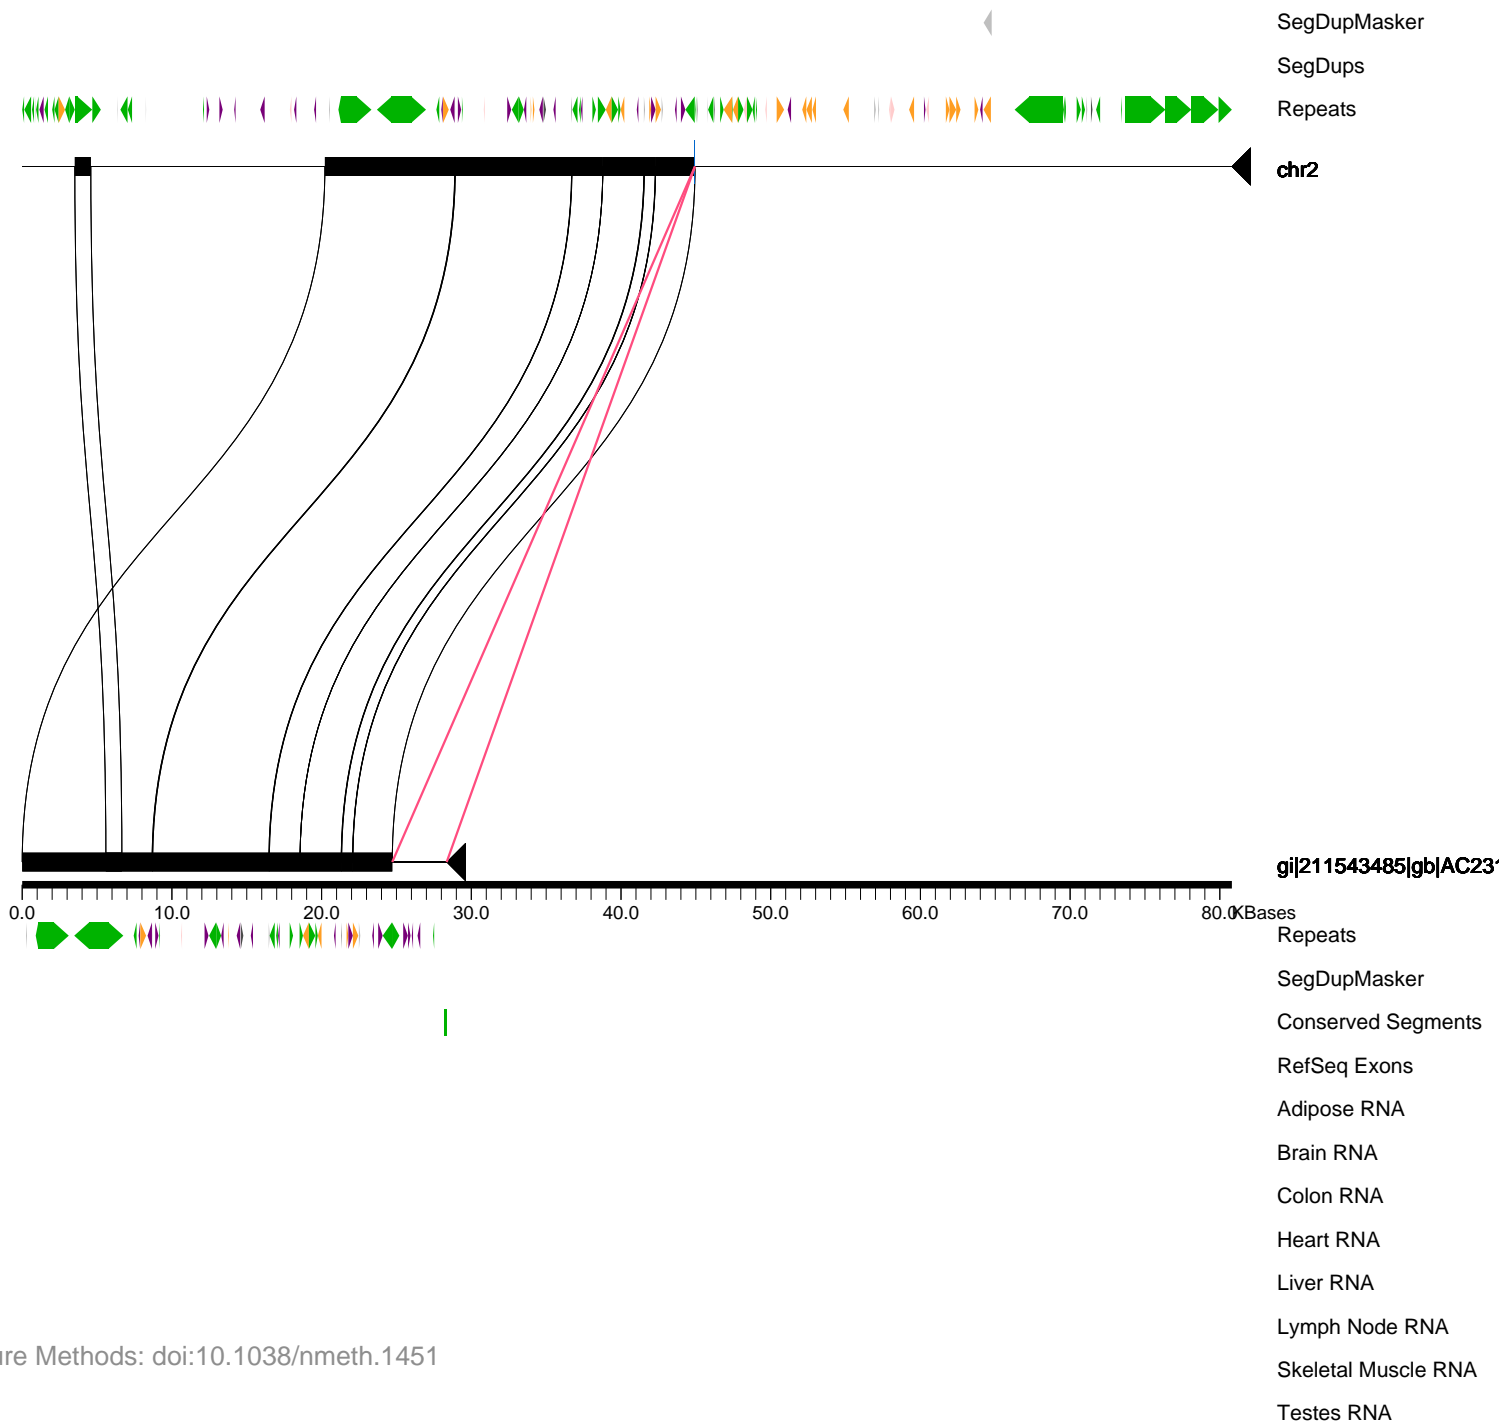



Clone file = AC231982.rc.fa

Insertion Size: 5487

Other Simple Repeat Low Complexity DNA LTR LINE SINE

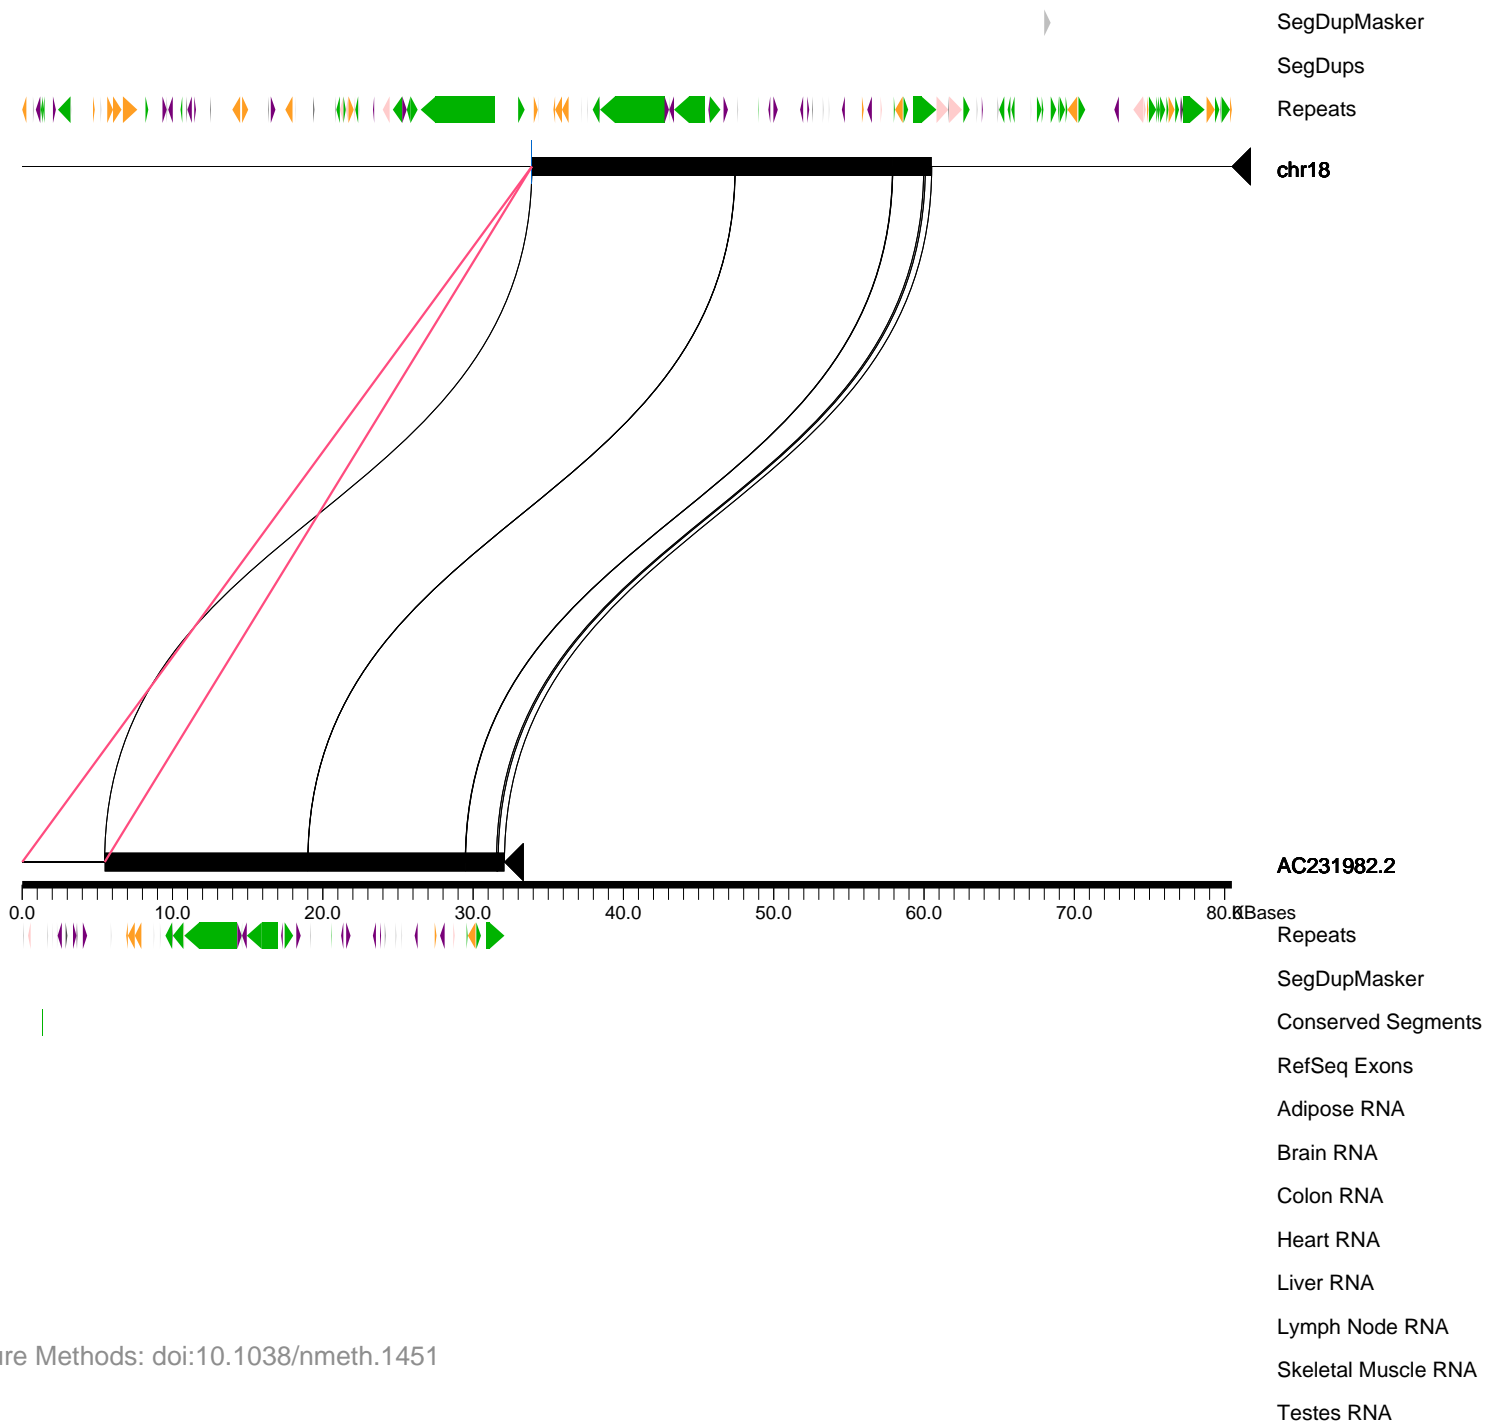

Clone file = AC231988.rc.fa

Insertion Size: 13975

Other Simple Repeat Low Complexity DNA LTR LINE SINE

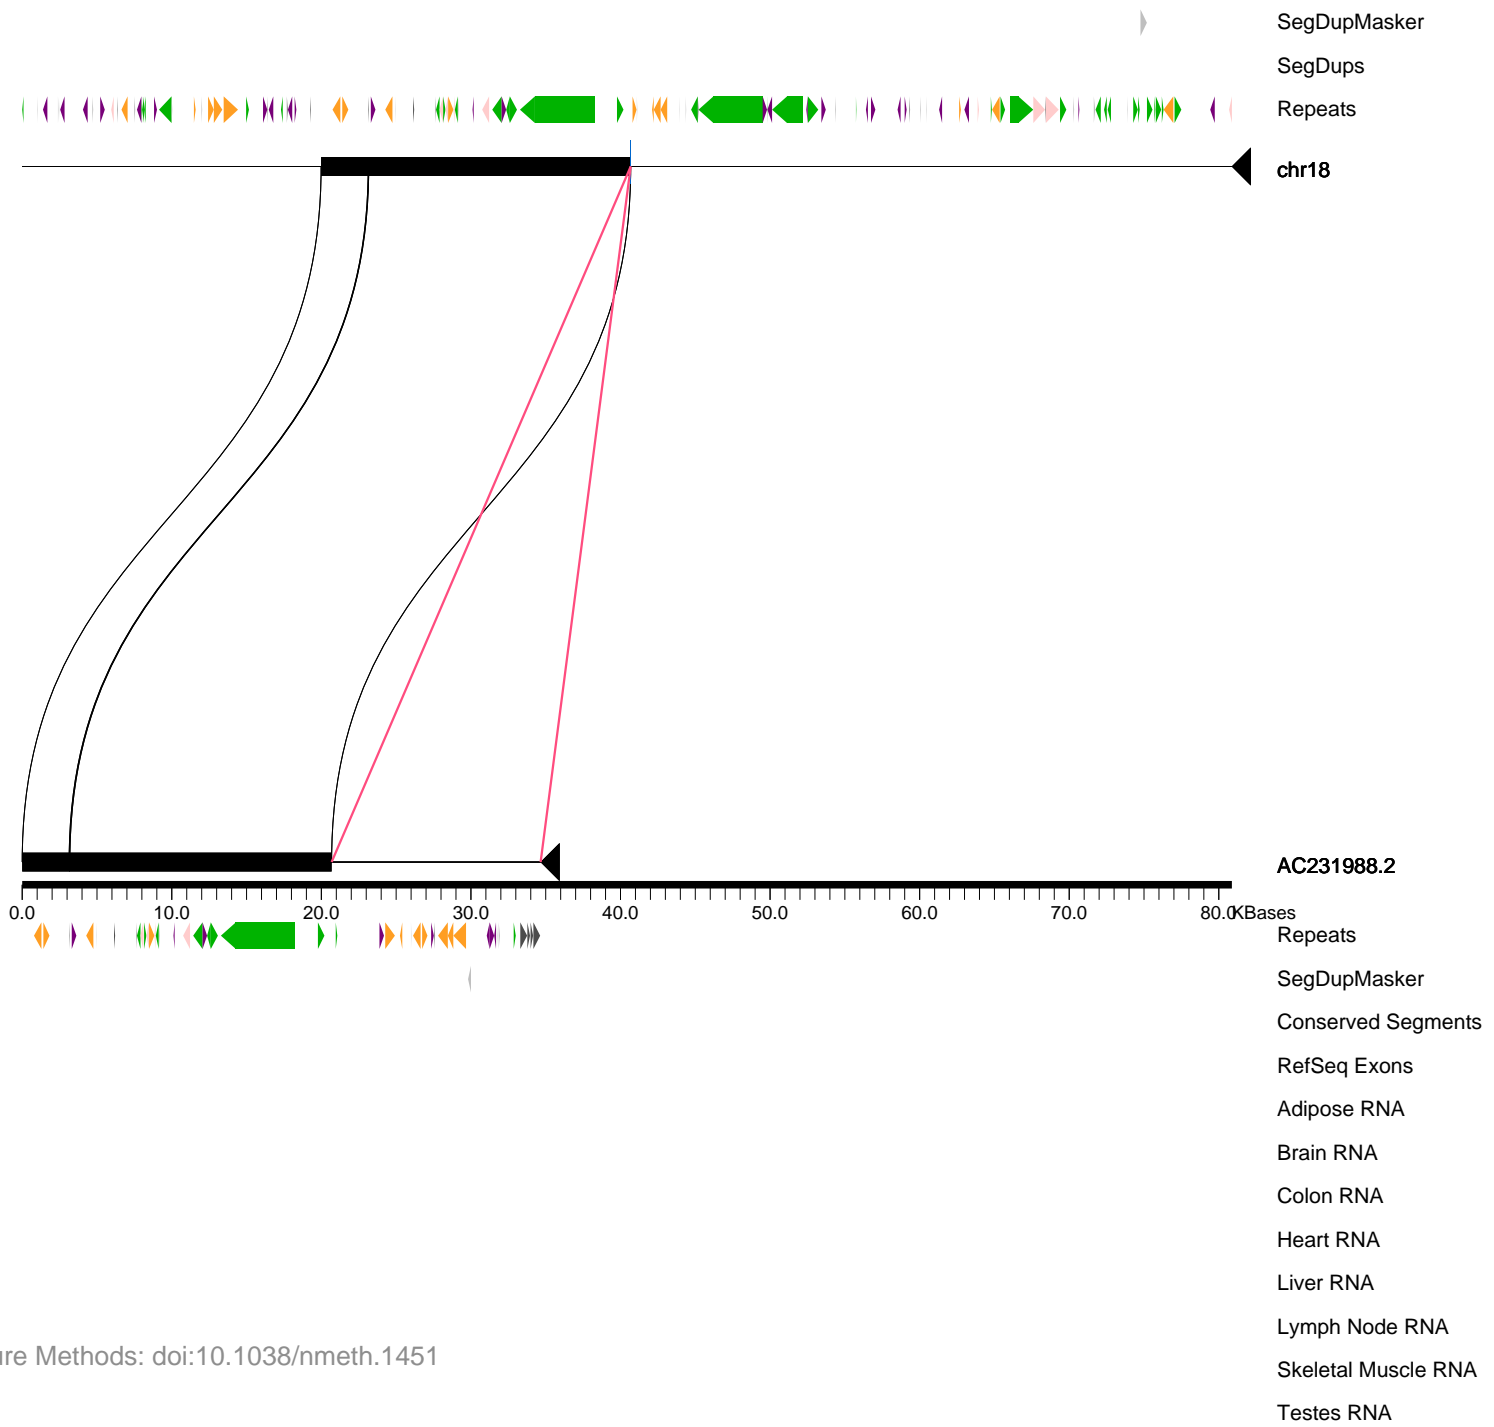

Clone file = AC231989.fa

Insertion Size: 8761

Other Simple Repeat Low Complexity DNA LTR LINE SINE

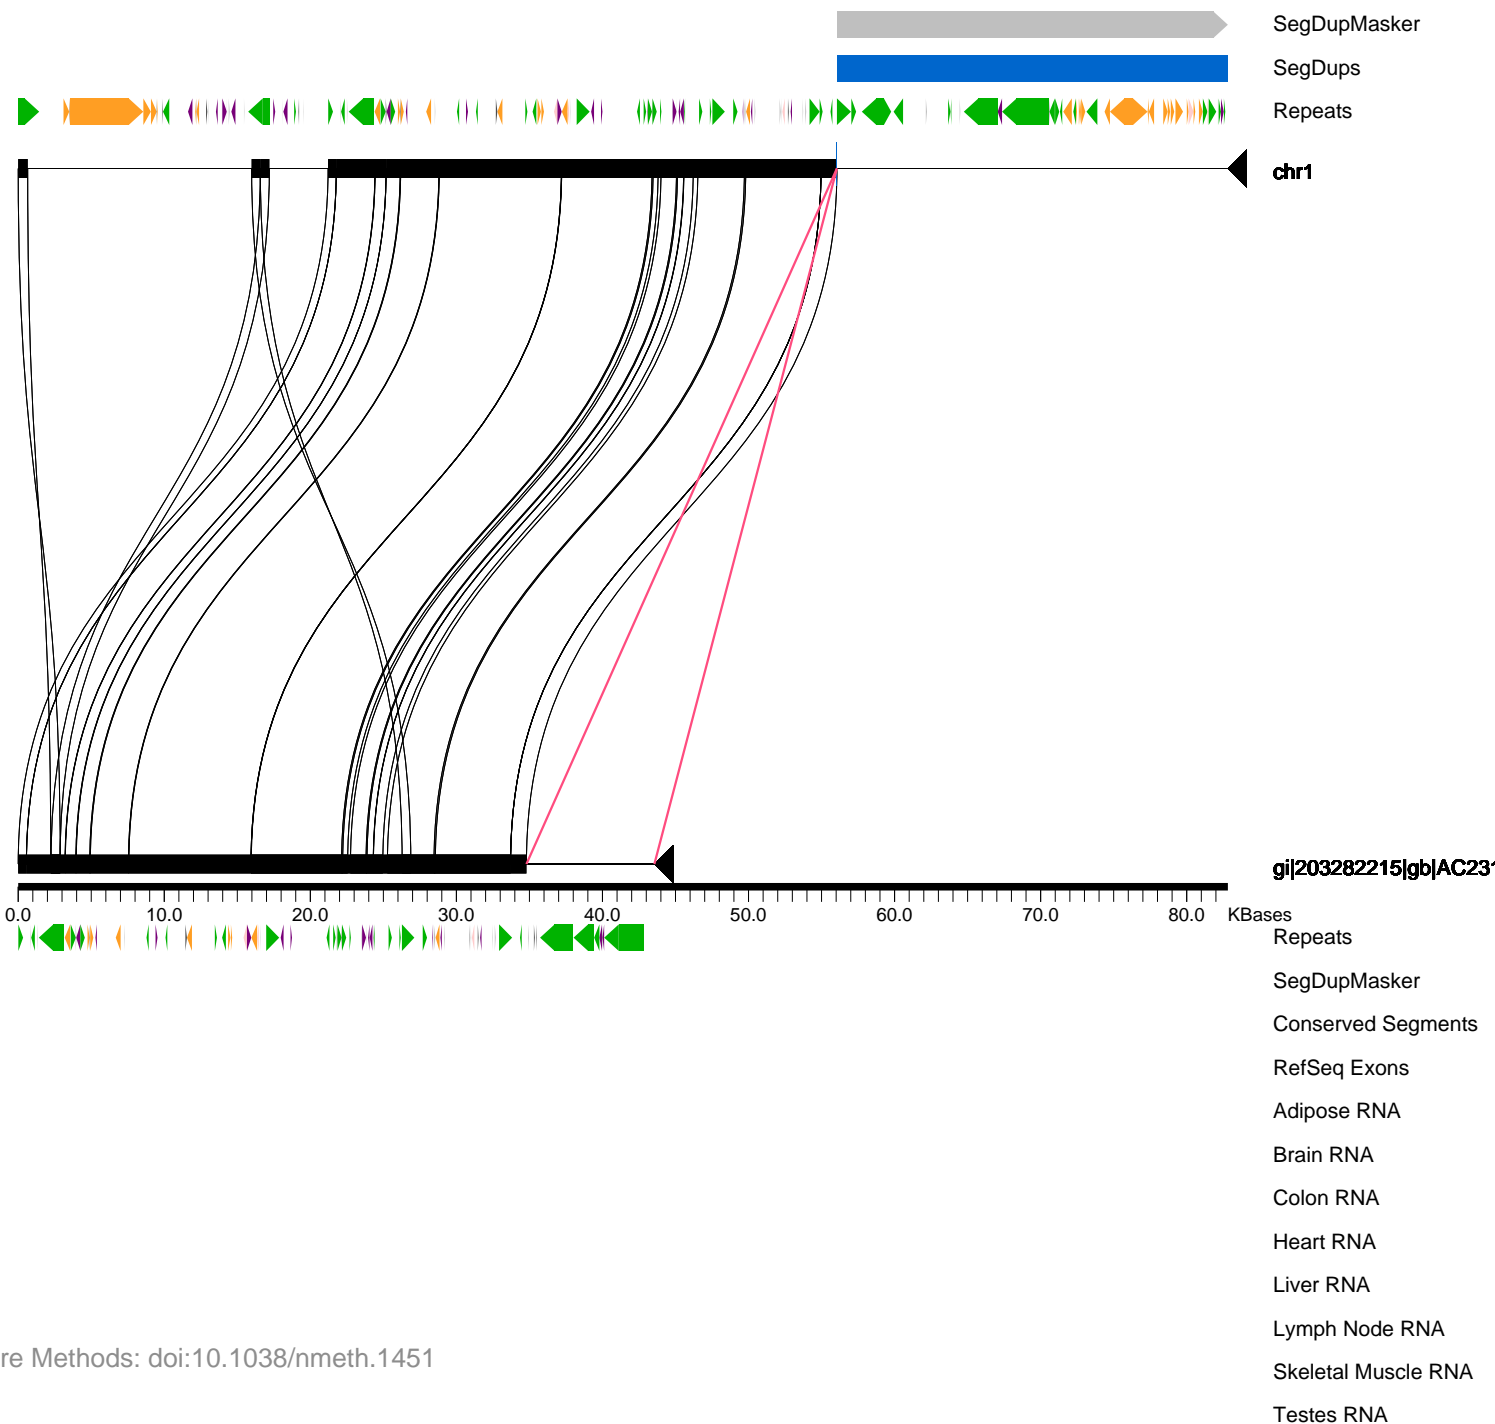

Clone file = AC232224.fa

Insertion Size: 19960

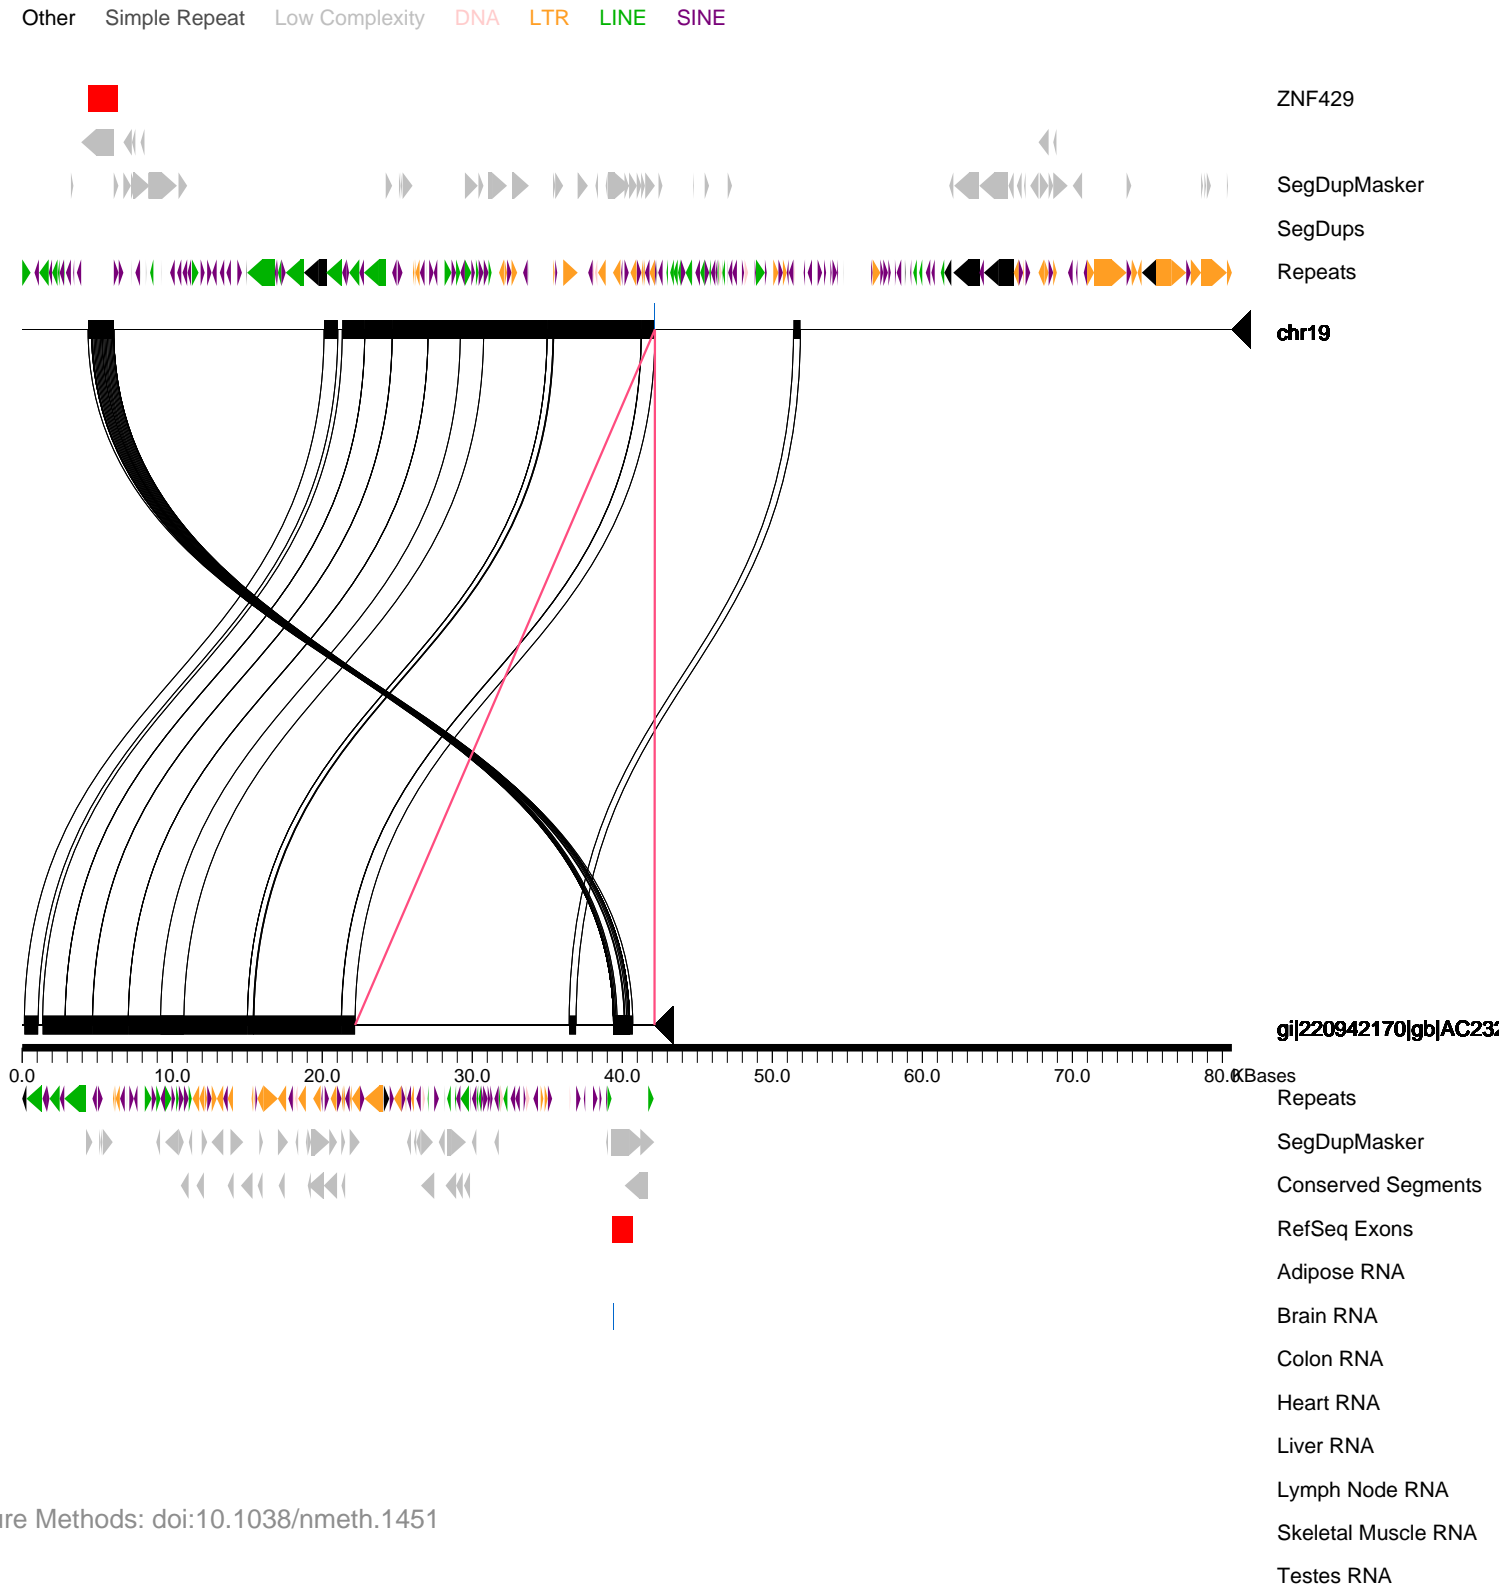

Clone file = AC232301.rc.fa

Insertion Size: 33937

Other Simple Repeat Low Complexity DNA LTR LINE SINE

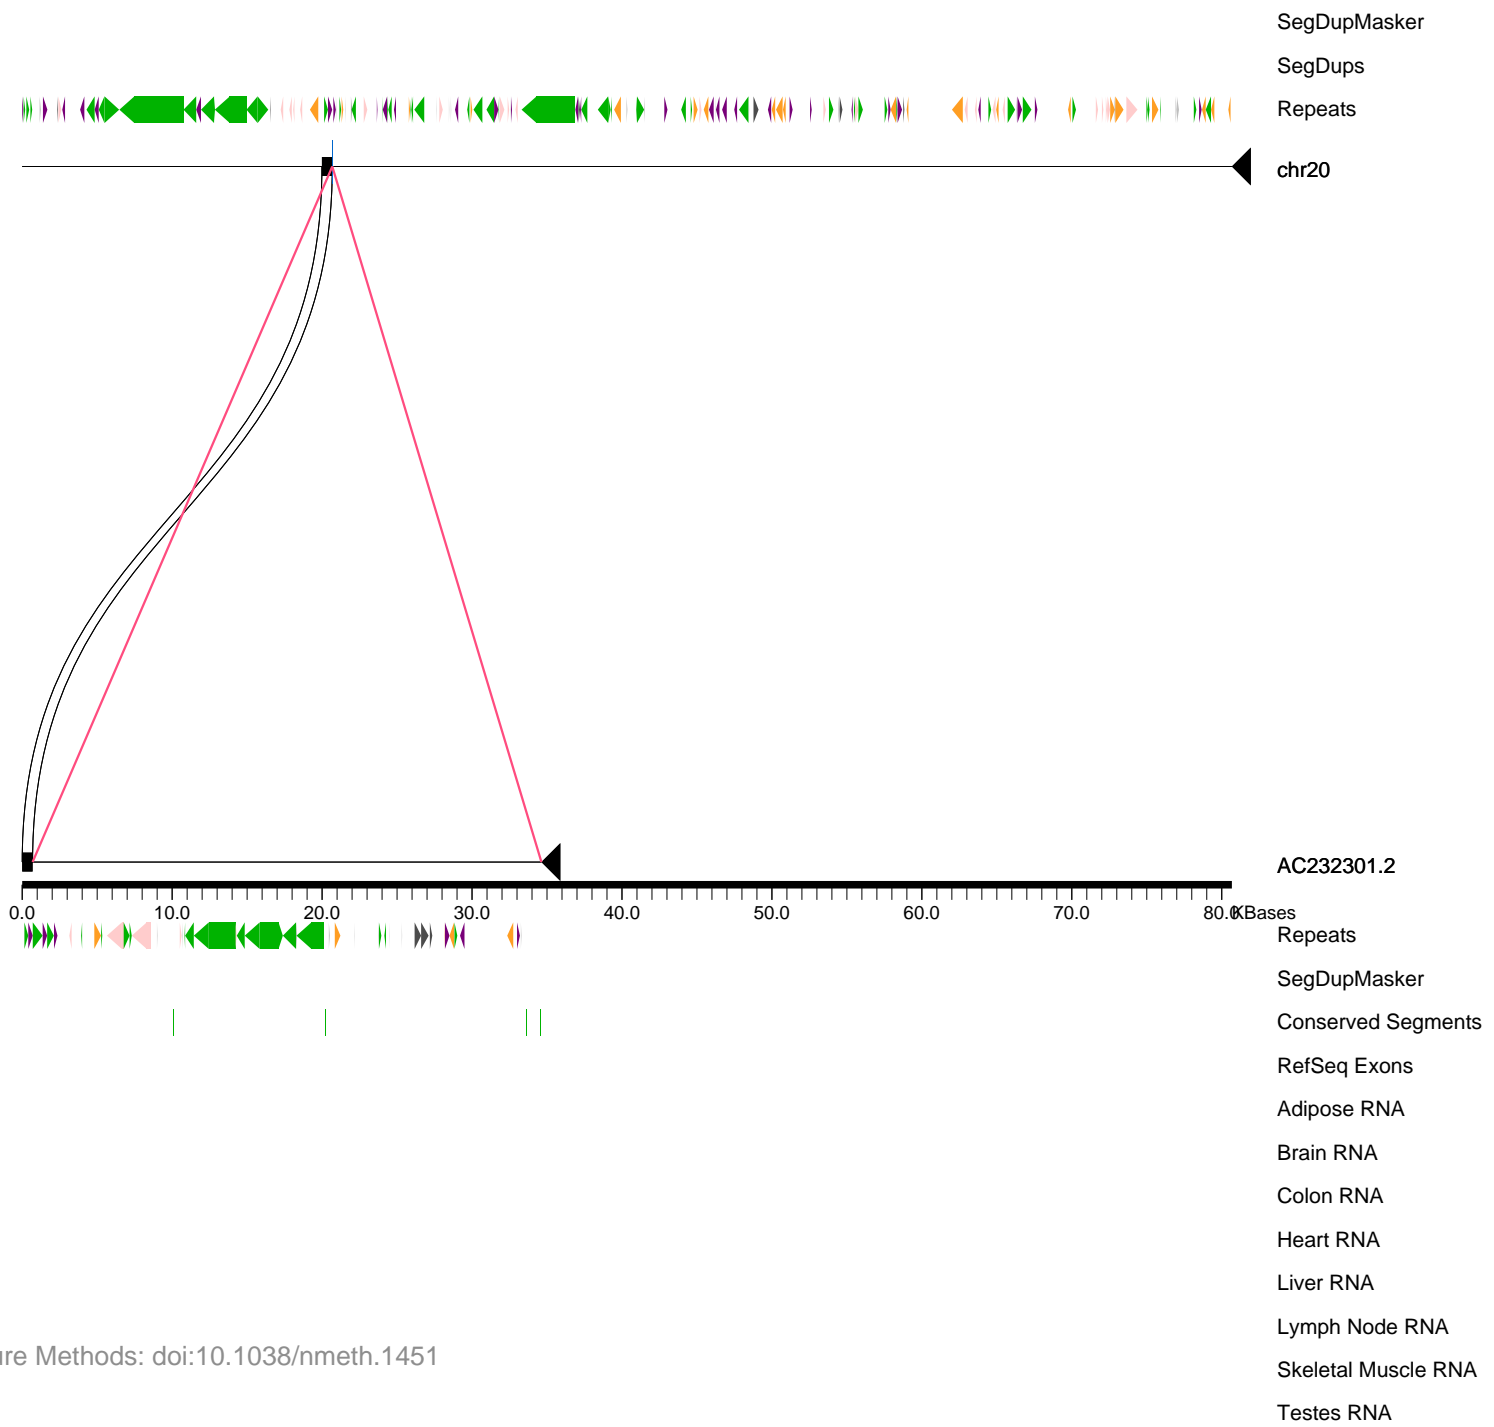

Clone file = AC232302.fa

Insertion Size: 10943

Other Simple Repeat Low Complexity DNA LTR LINE SINE

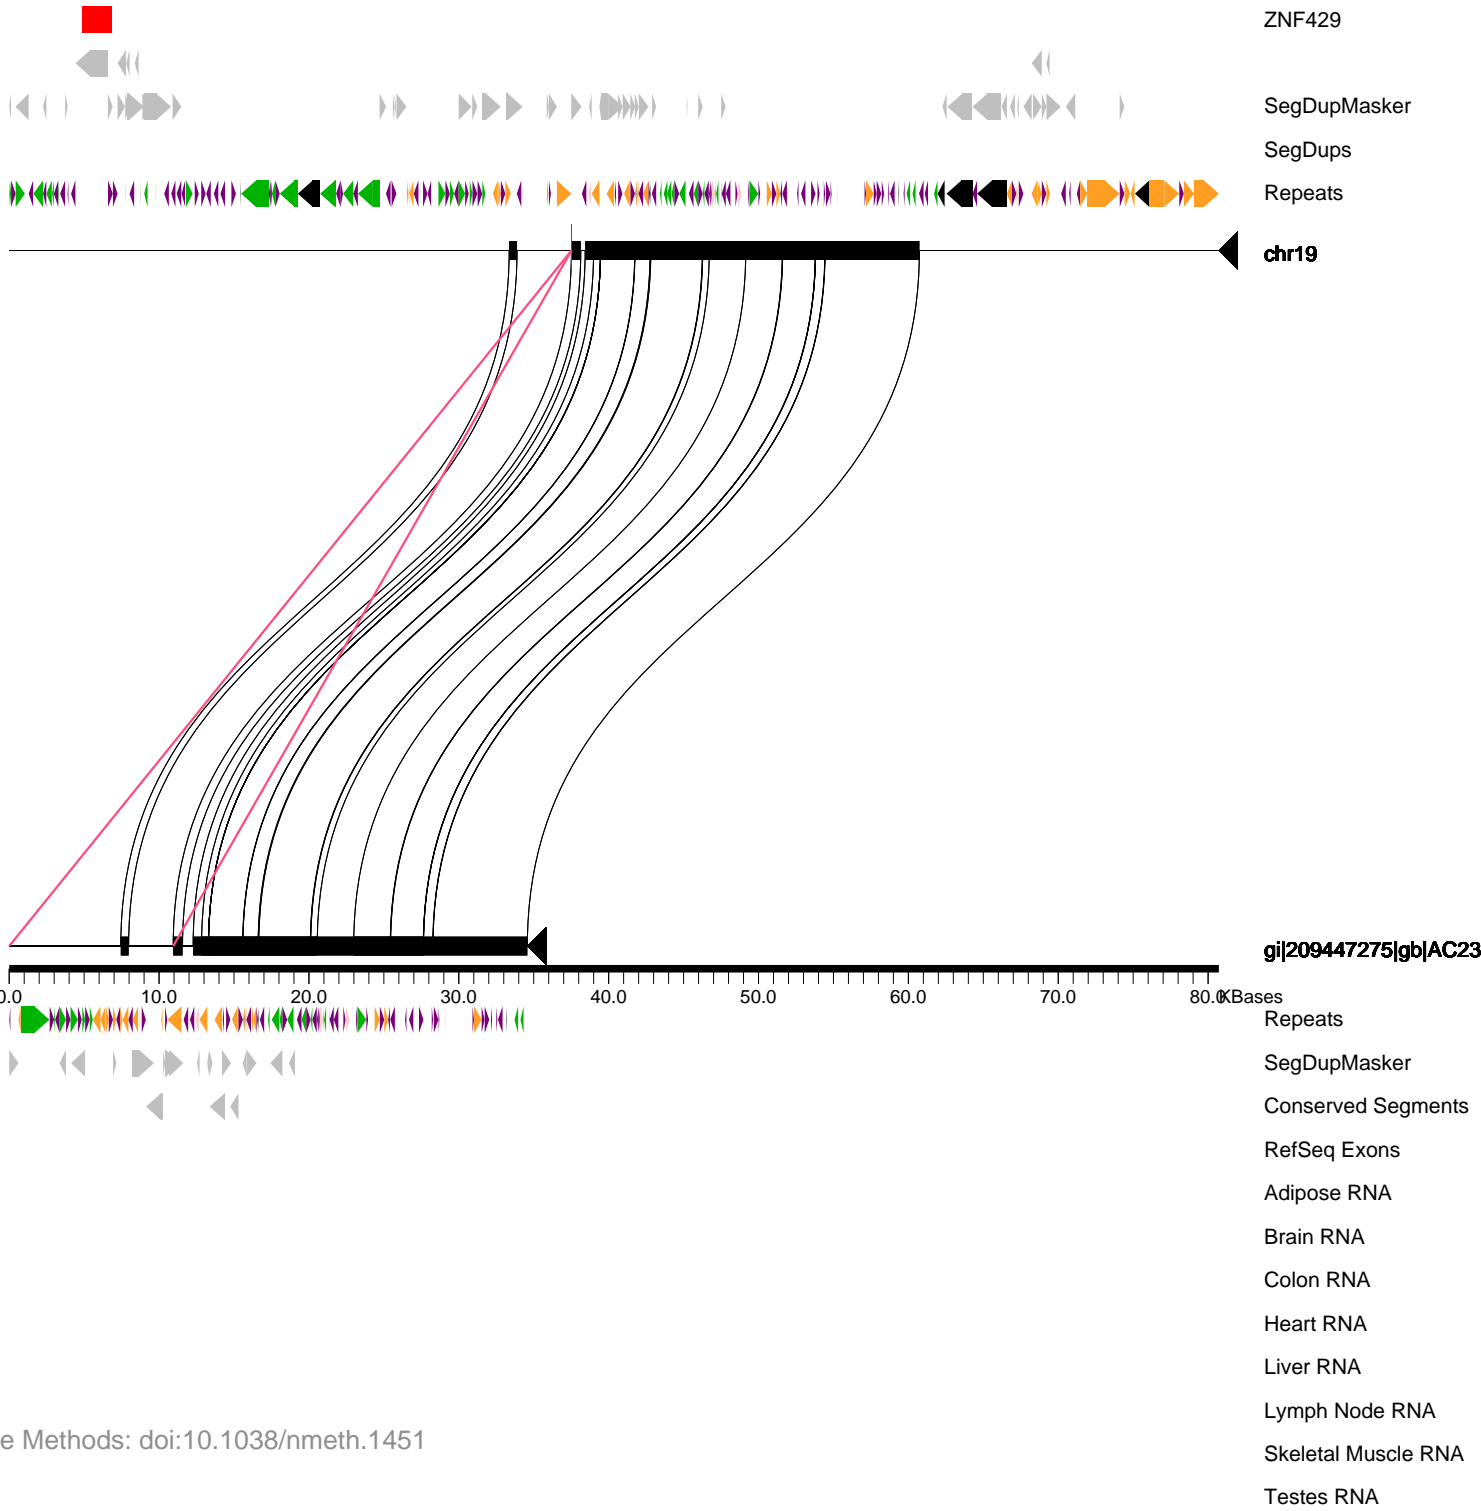

Clone file = AC232304.fa

Insertion Size: 34338

Other Simple Repeat Low Complexity DNA LTR LINE SINE

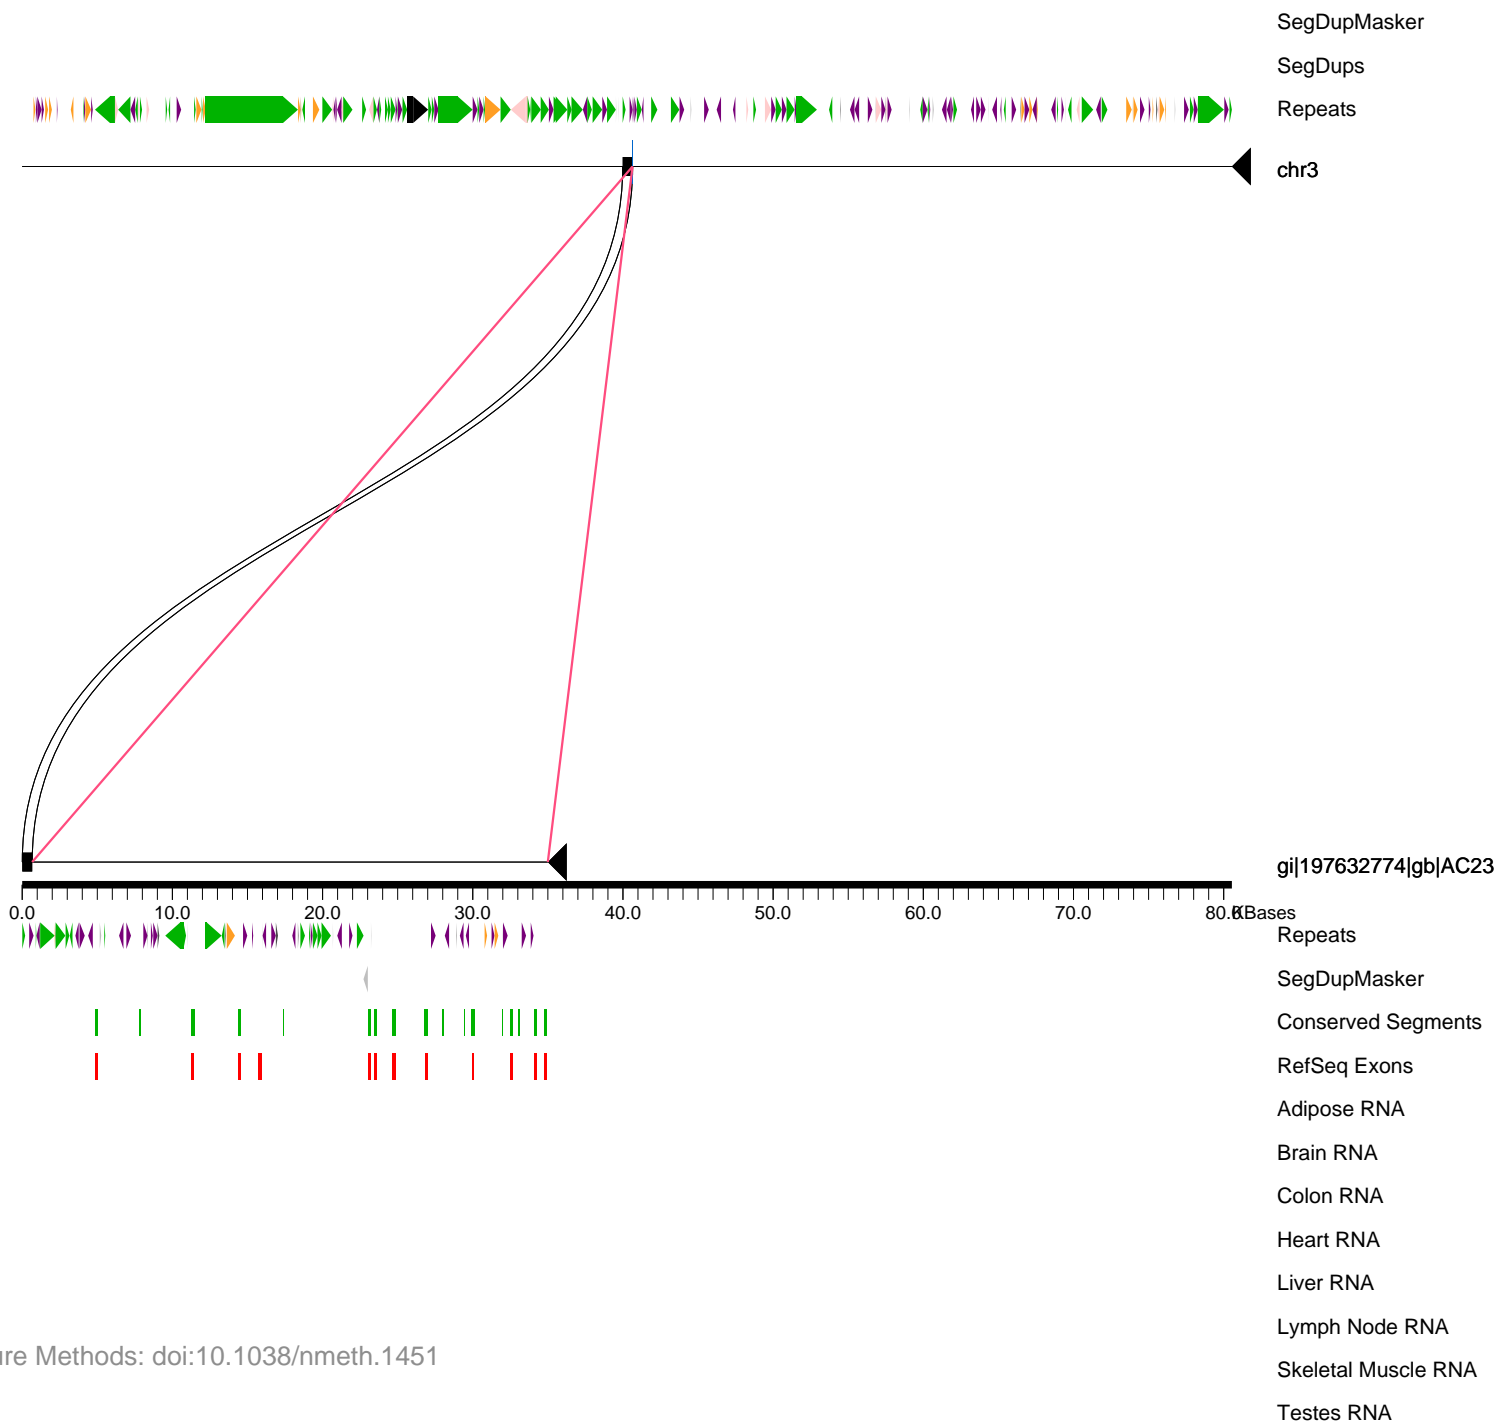

Clone file = AC232307.rc.fa

Insertion Size: 37813

Other Simple Repeat Low Complexity DNA LTR LINE SINE

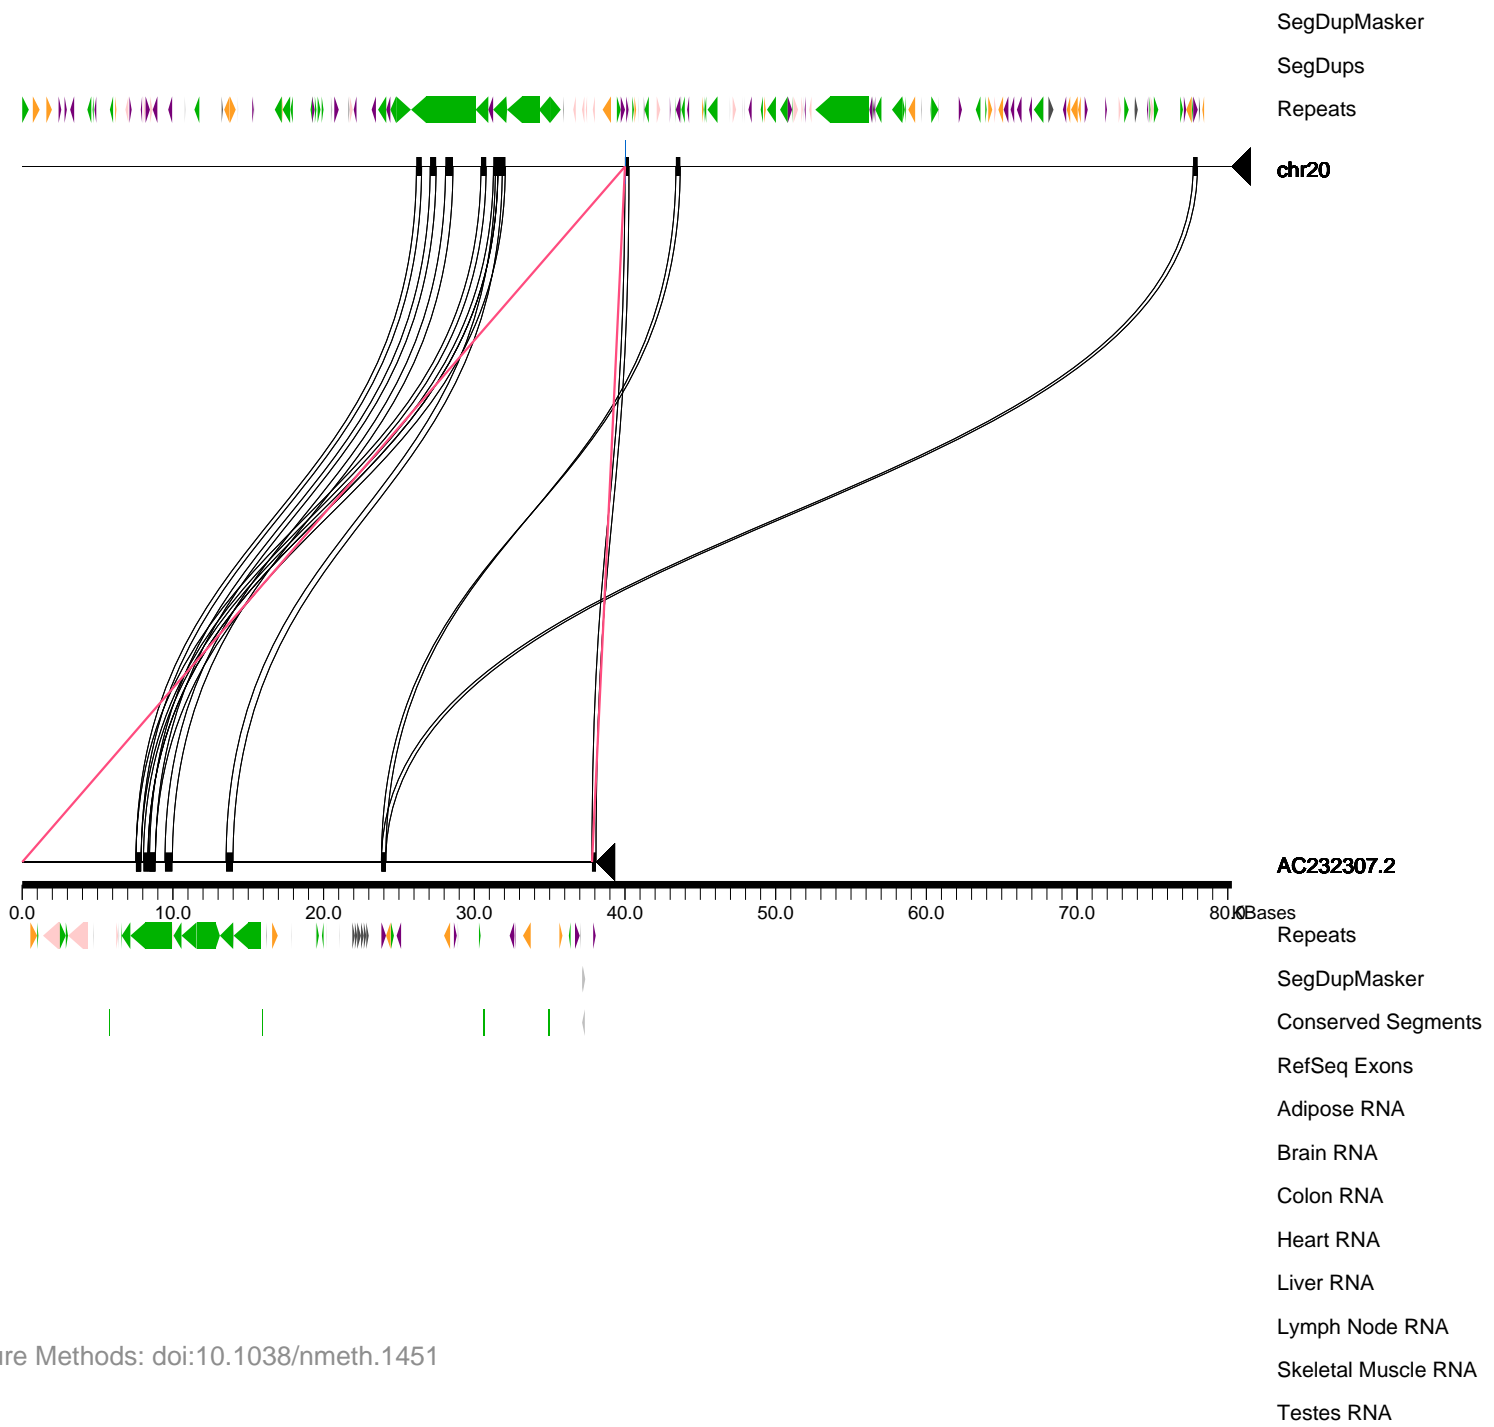



Clone file = AC232309.fa

Insertion Size: 38130

Other Simple Repeat Low Complexity DNA LTR LINE SINE

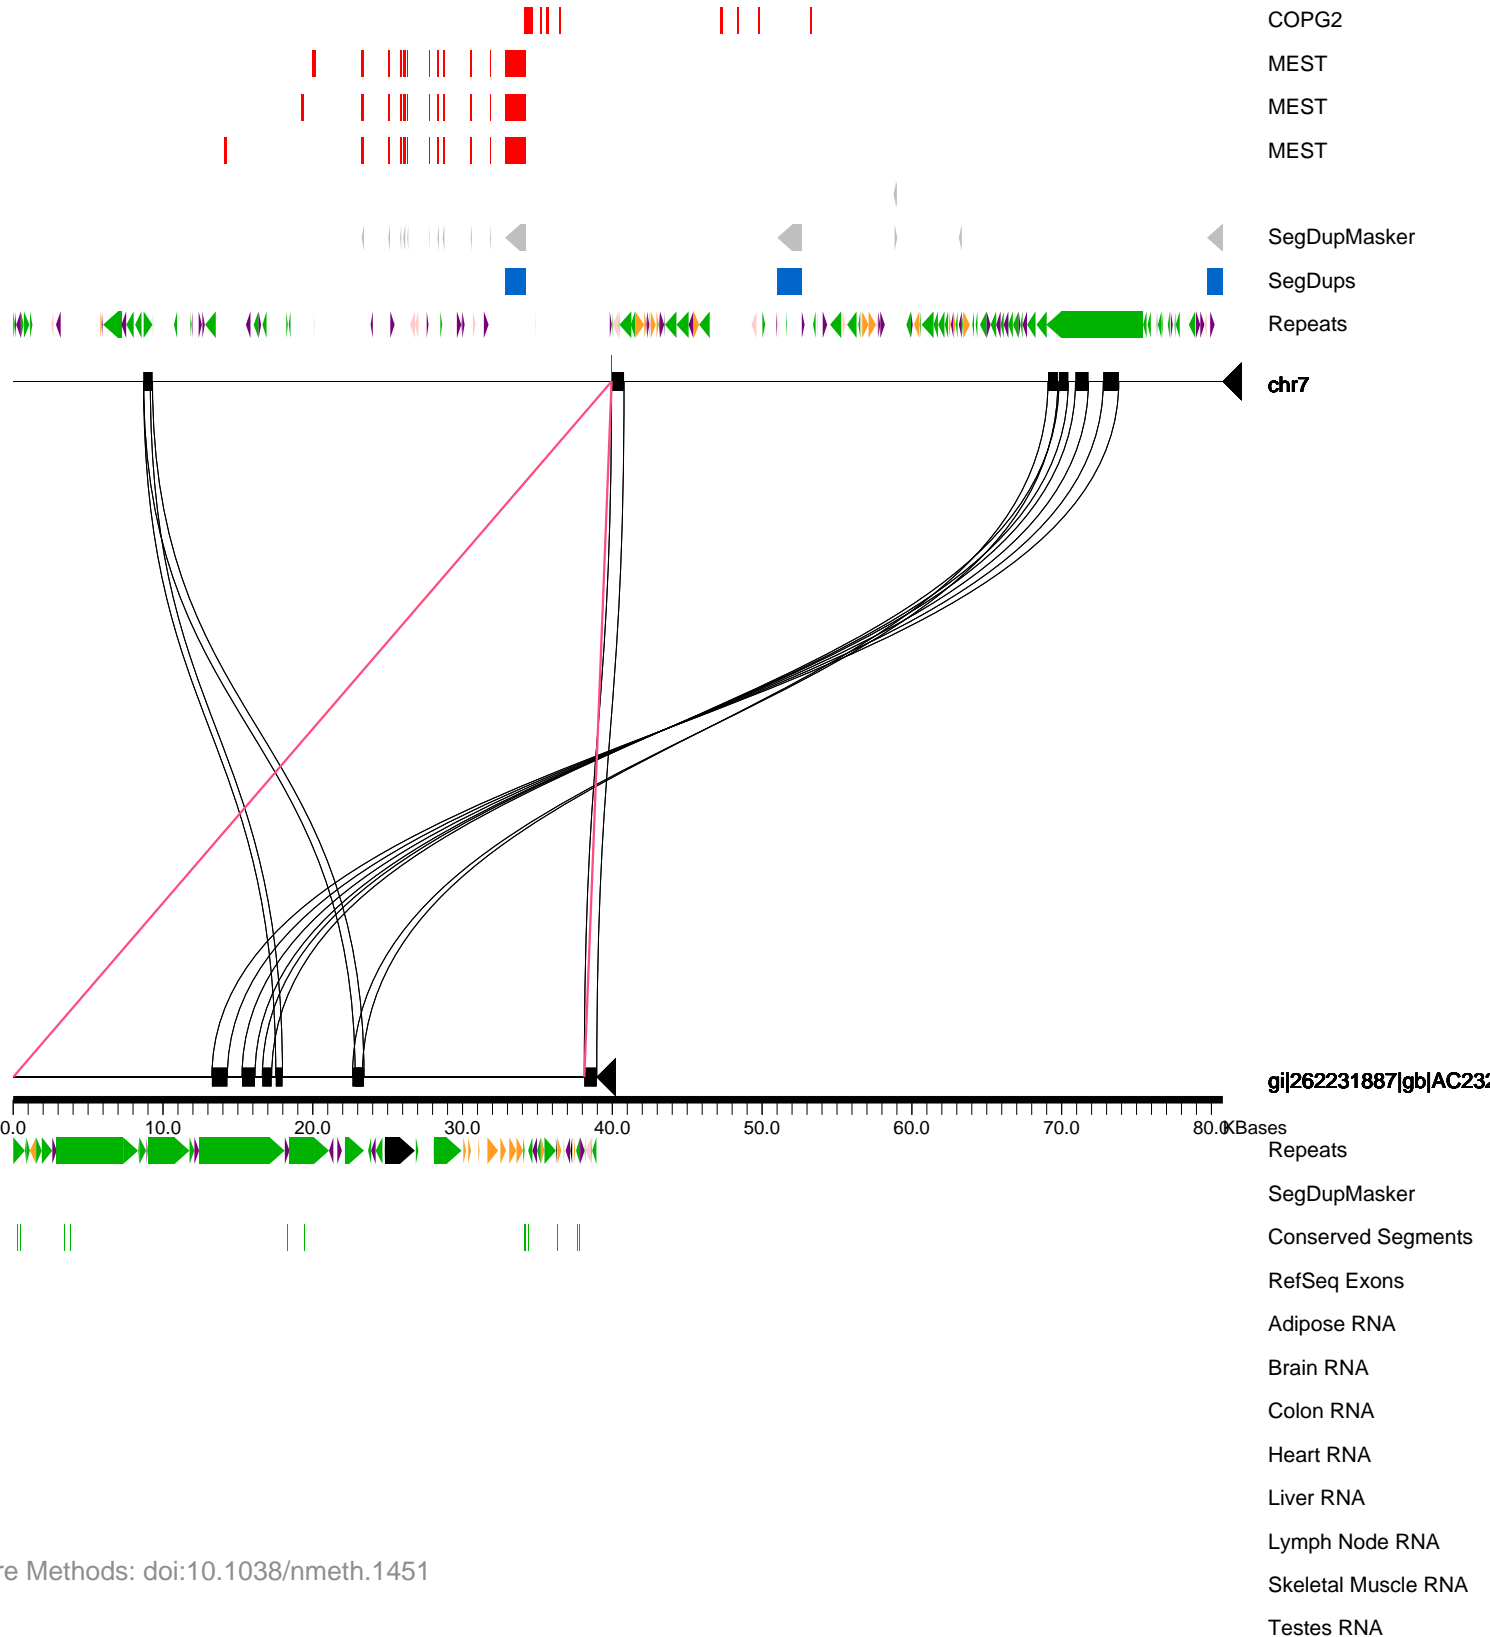

Clone file = AC232310.rc.fa

Insertion Size: 39484

Other Simple Repeat Low Complexity DNA LTR LINE SINE

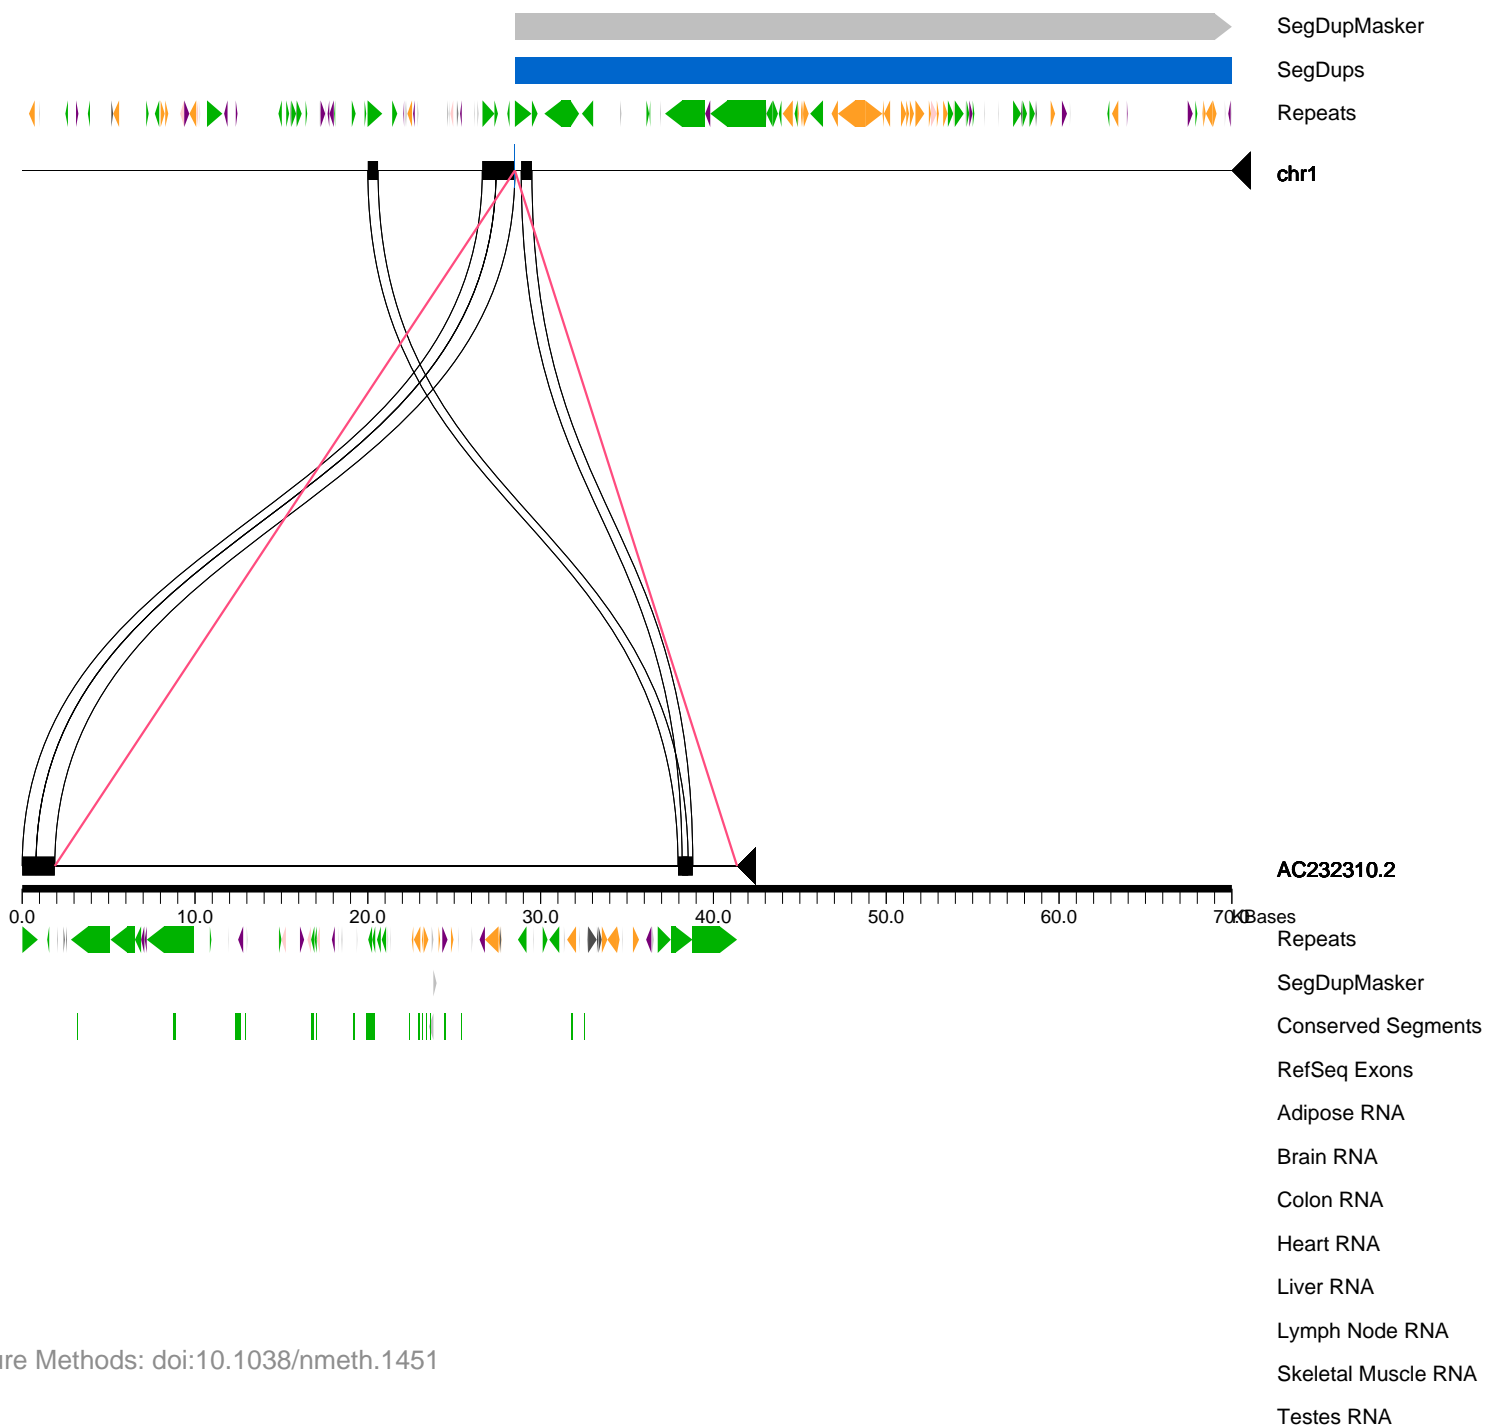

Clone file = AC233314.fa

Insertion Size: 1179

Other Simple Repeat Low Complexity DNA LTR LINE SINE

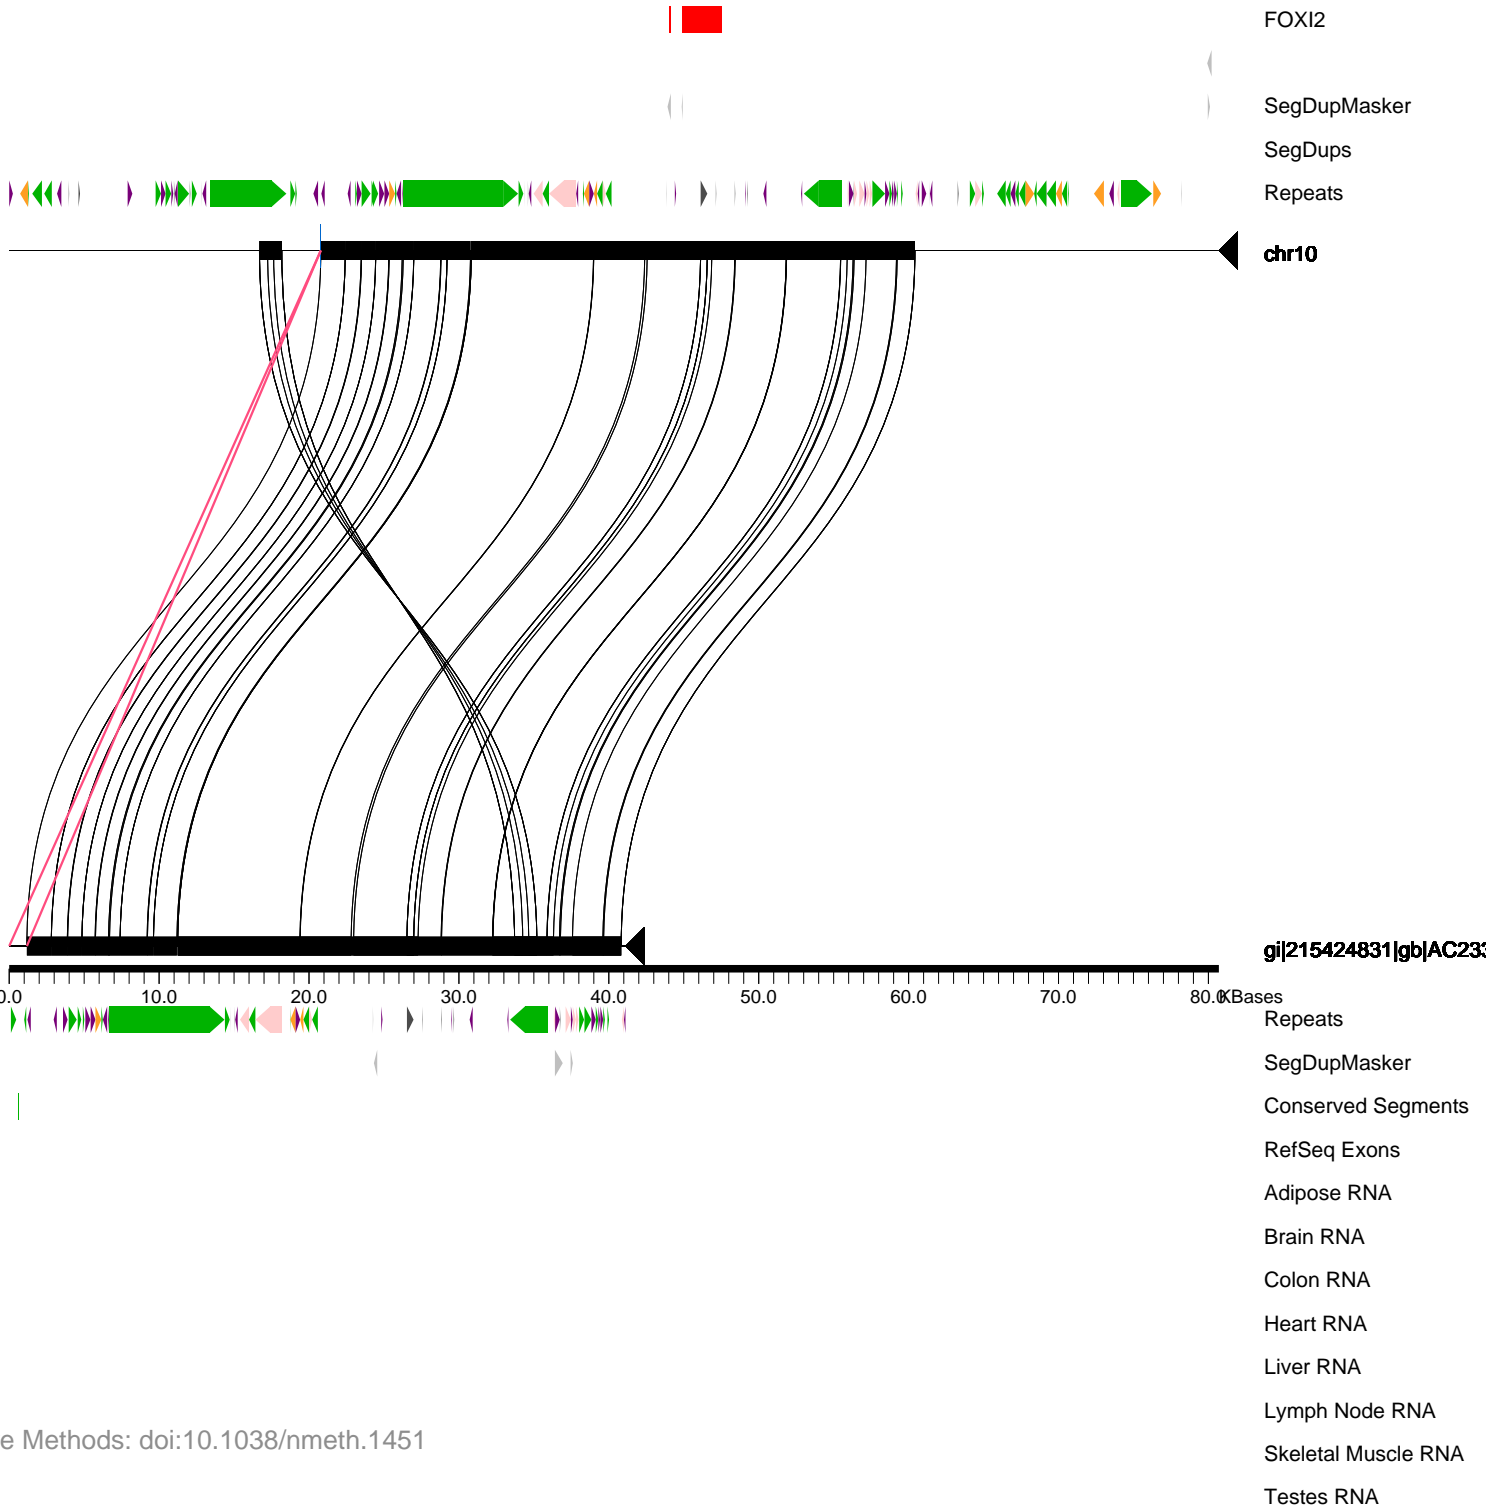

Clone file = AC233712.rc.fa

Insertion Size: 2017

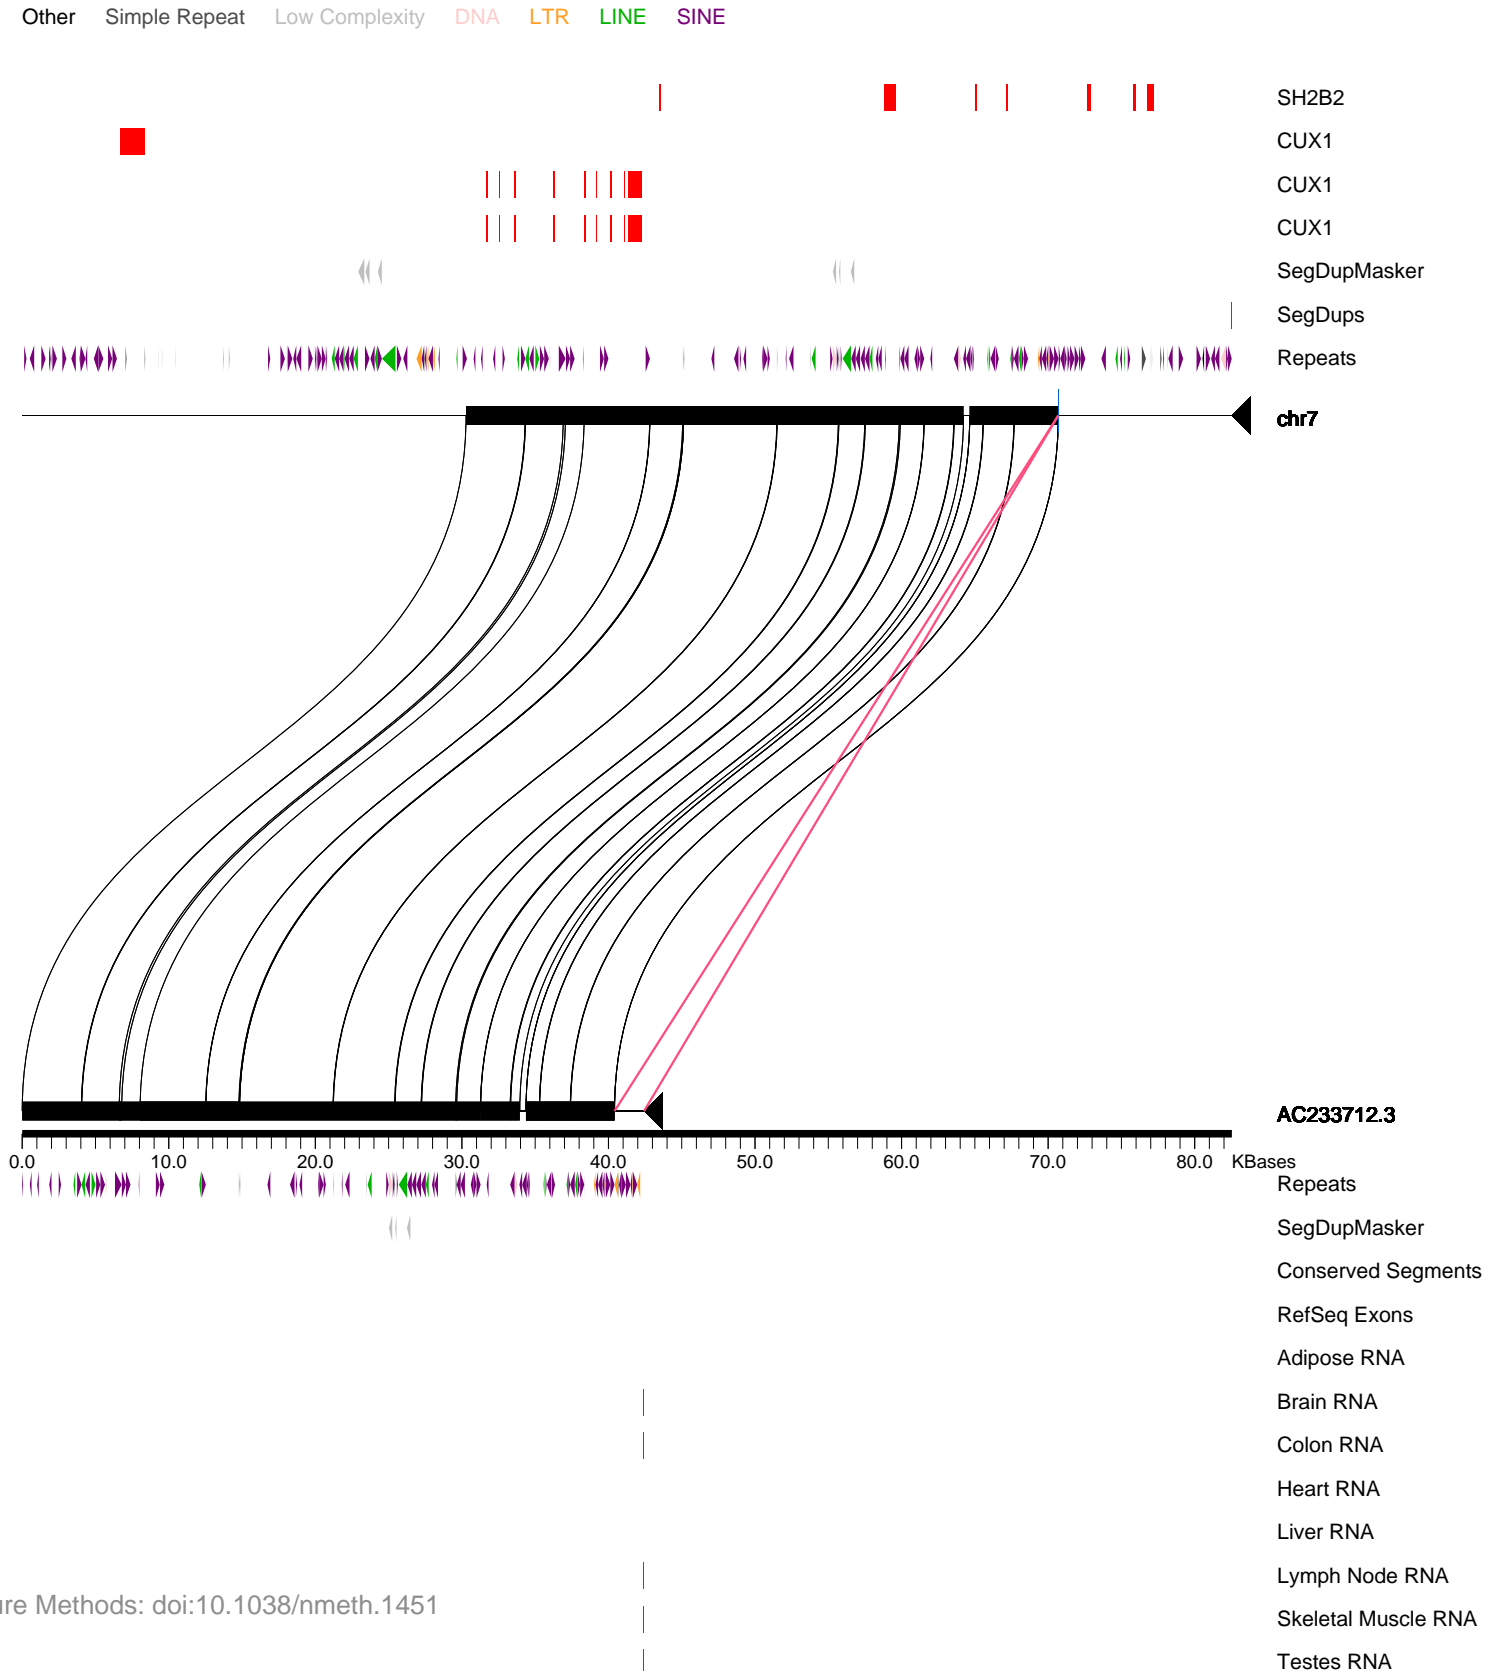

Clone file = AC233714.fa

Insertion Size: 10288

Other Simple Repeat Low Complexity DNA LTR LINE SINE

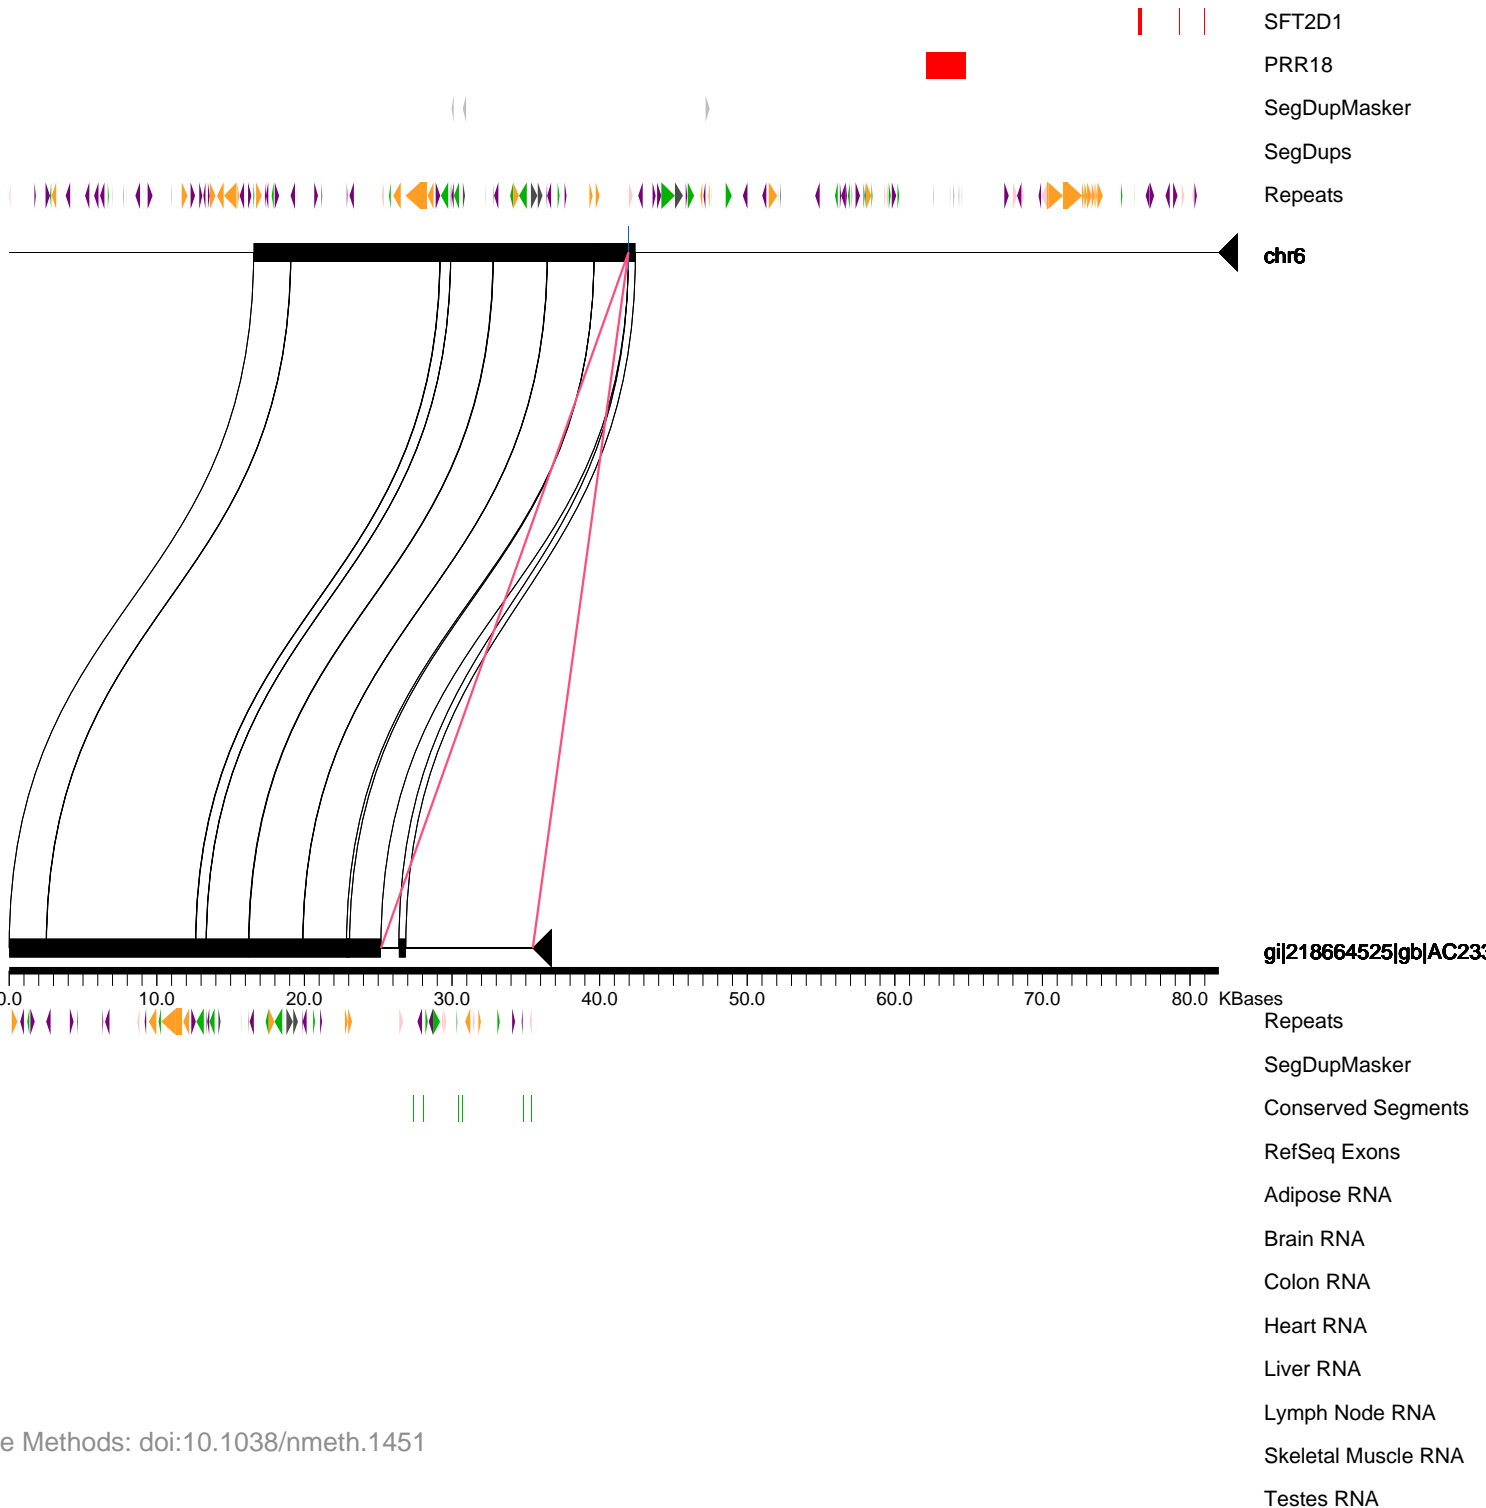

Clone file = AC233719.rc.fa

Insertion Size: 8961

Other Simple Repeat Low Complexity DNA LTR LINE SINE

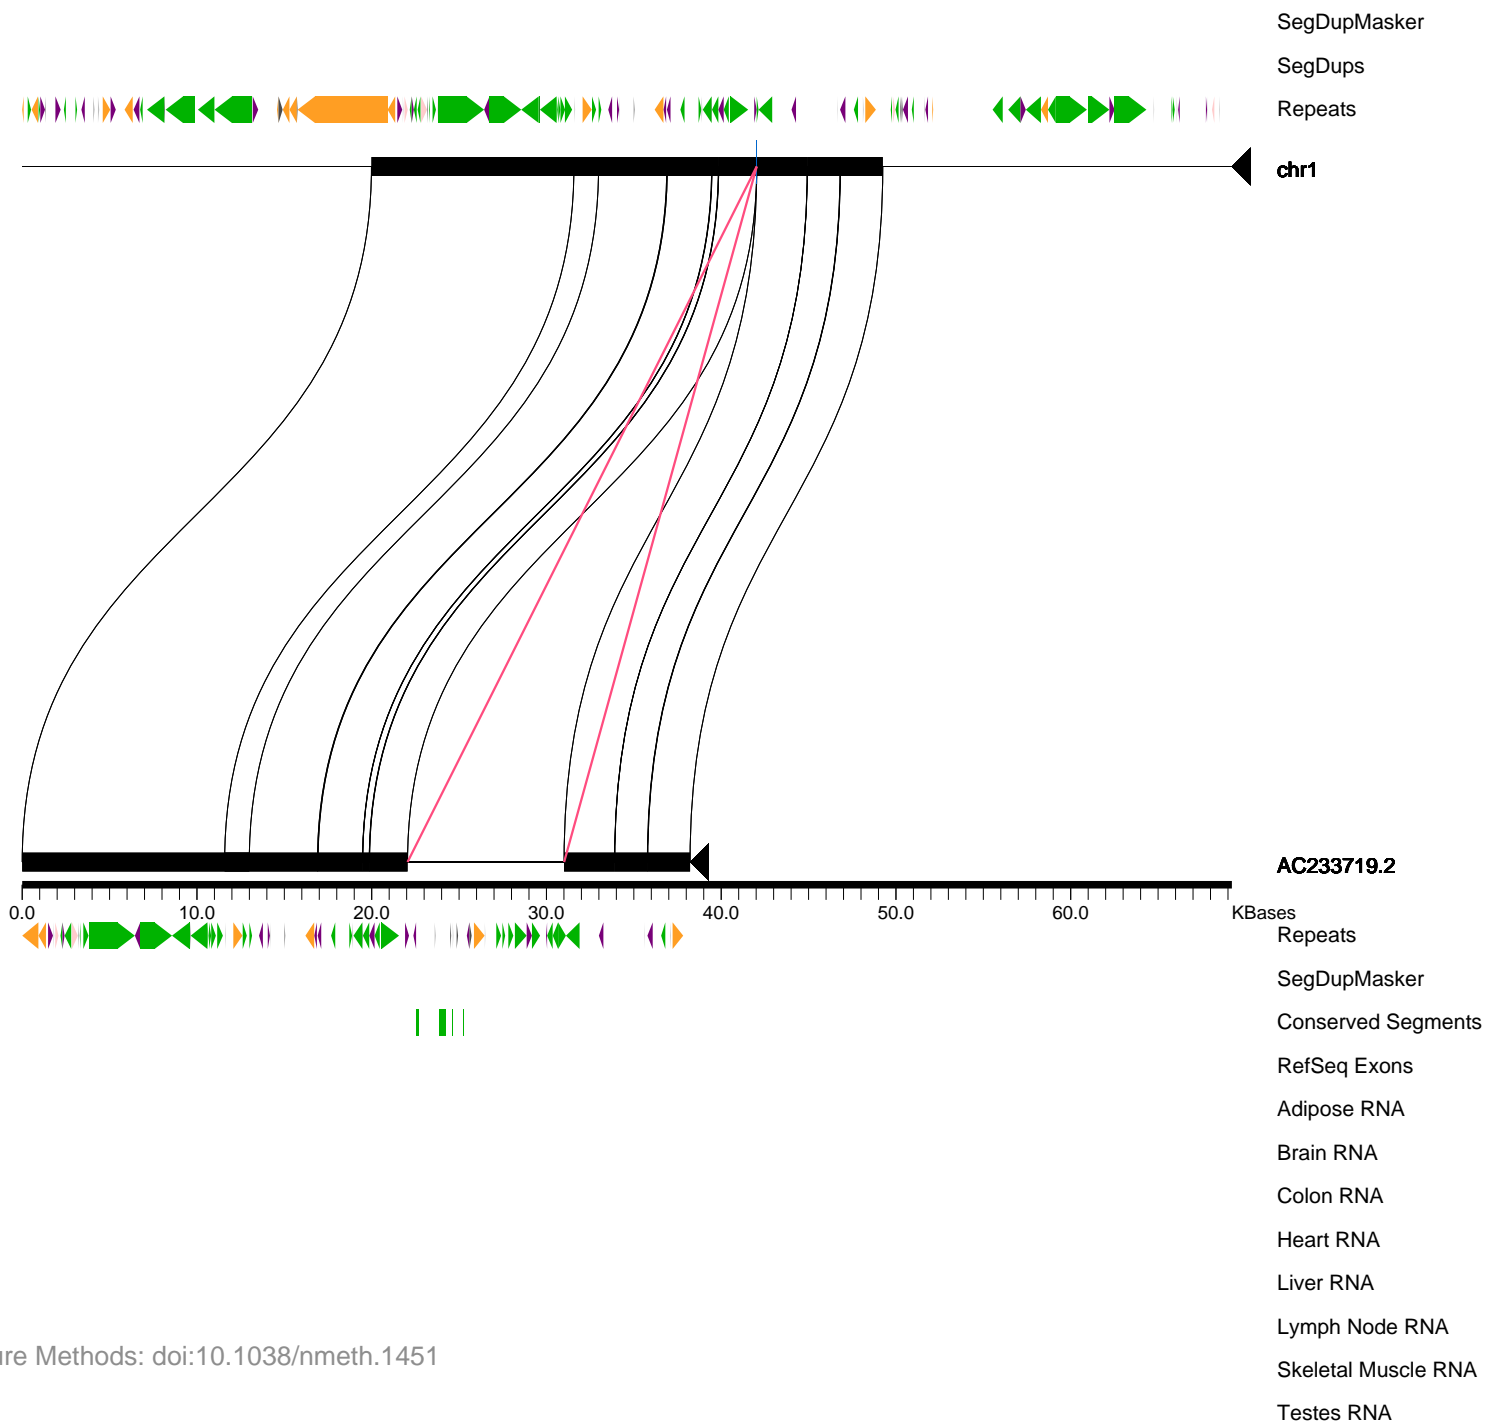

Clone file = AC233720.rc.fa

Insertion Size: 19486

Other Simple Repeat Low Complexity DNA LTR LINE SINE

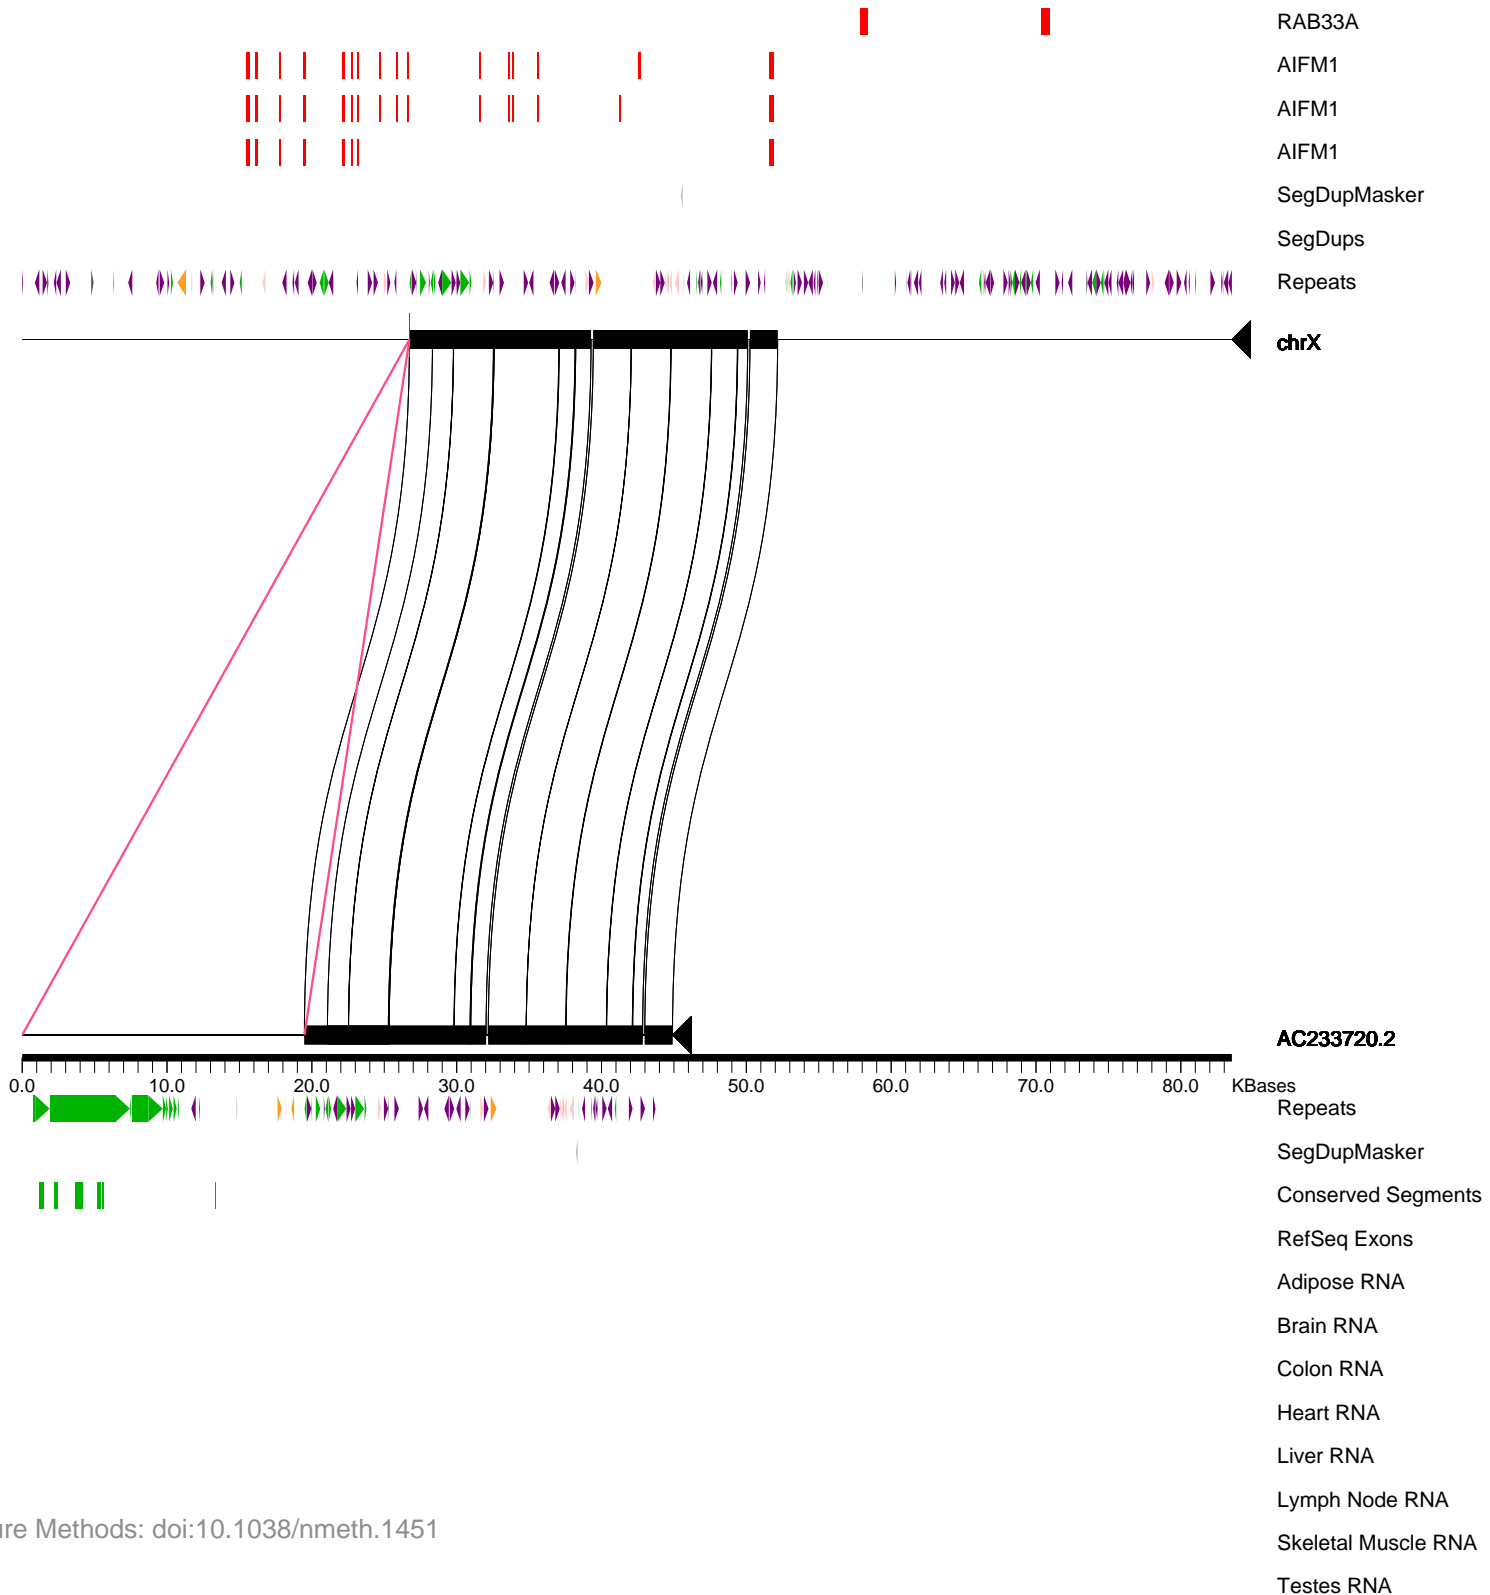

Clone file = AC233721.fa

Insertion Size: 1415

Other Simple Repeat Low Complexity DNA LTR LINE SINE

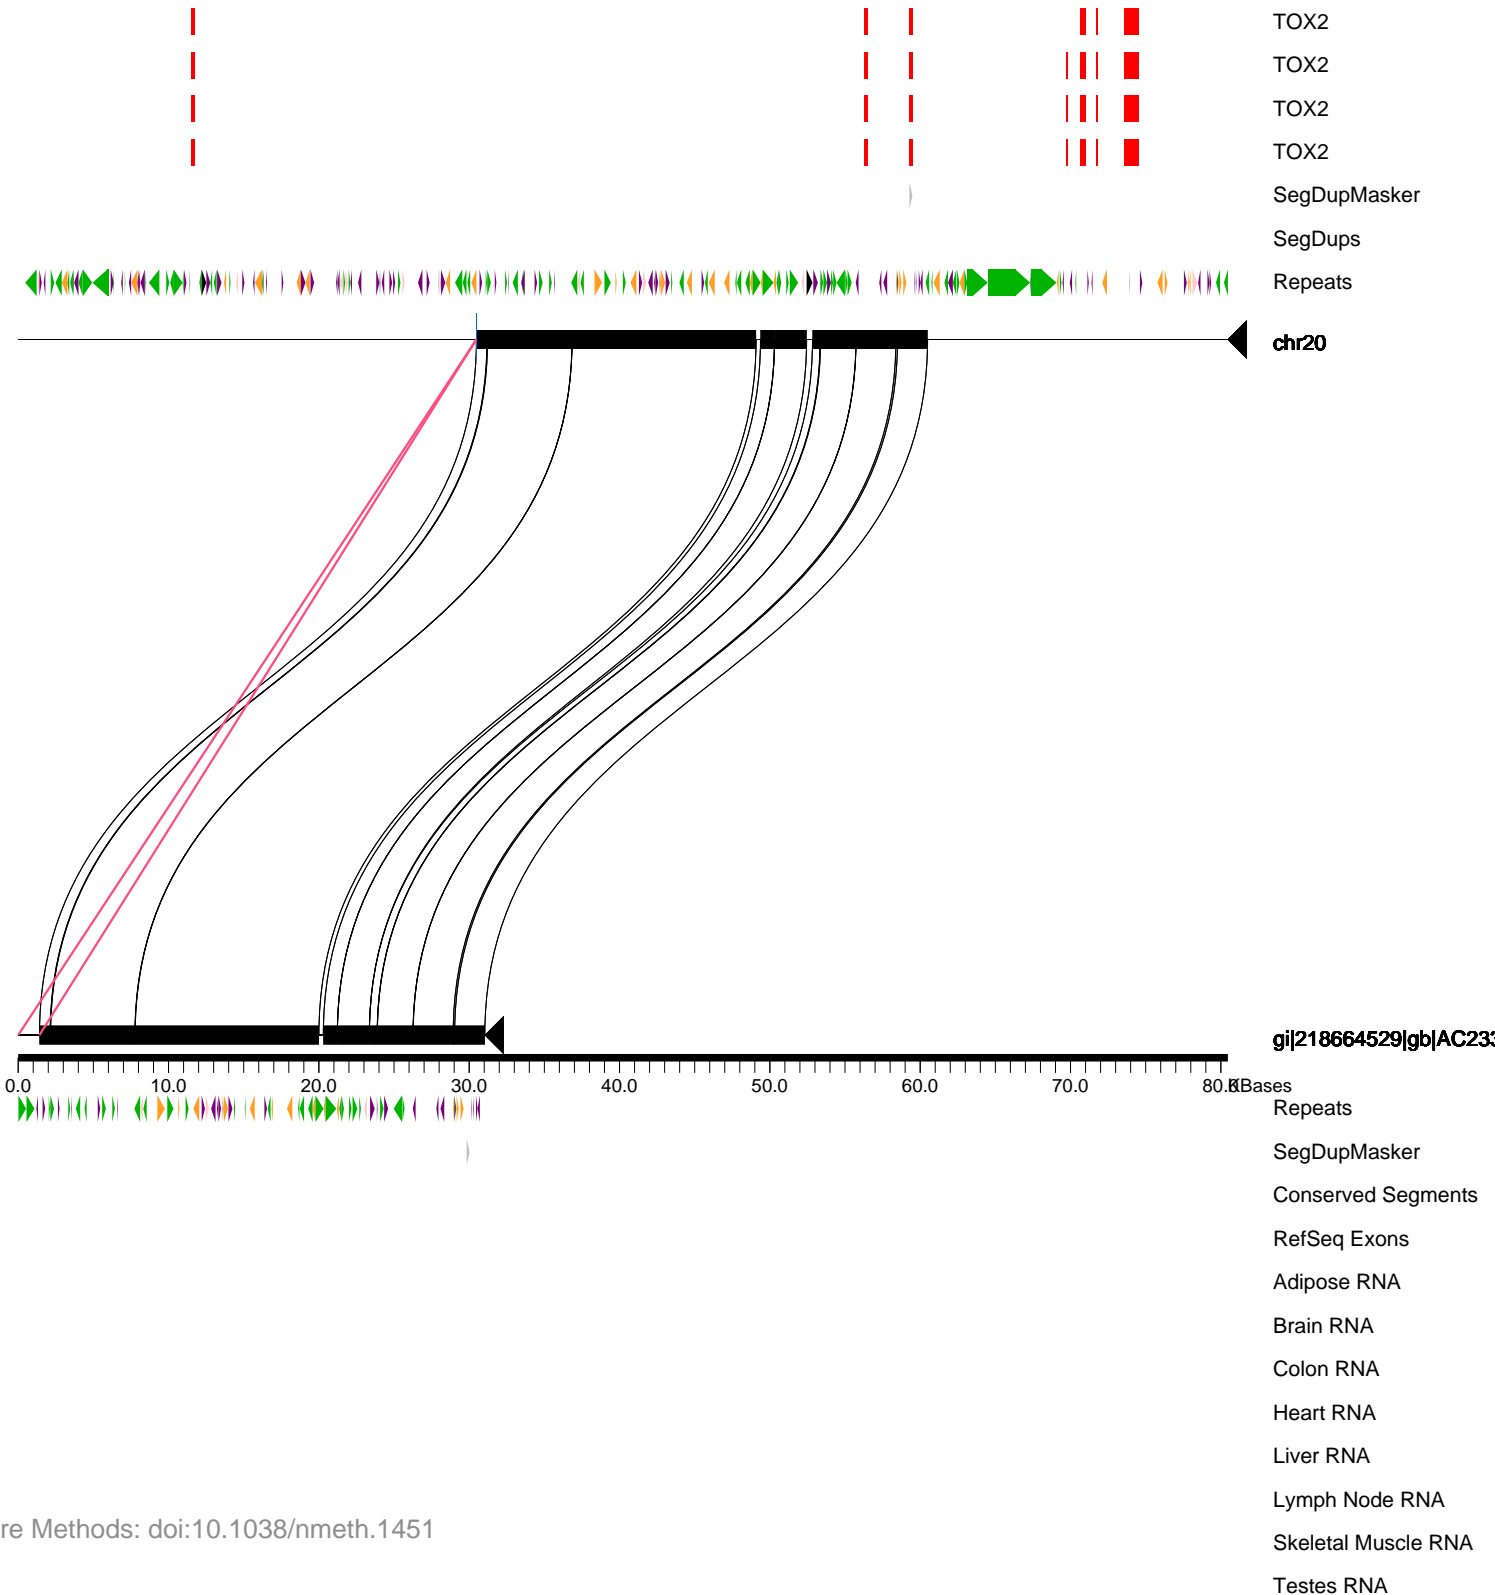



Clone file = AC233722.fa

Insertion Size: 1411

Other Simple Repeat Low Complexity DNA LTR LINE SINE

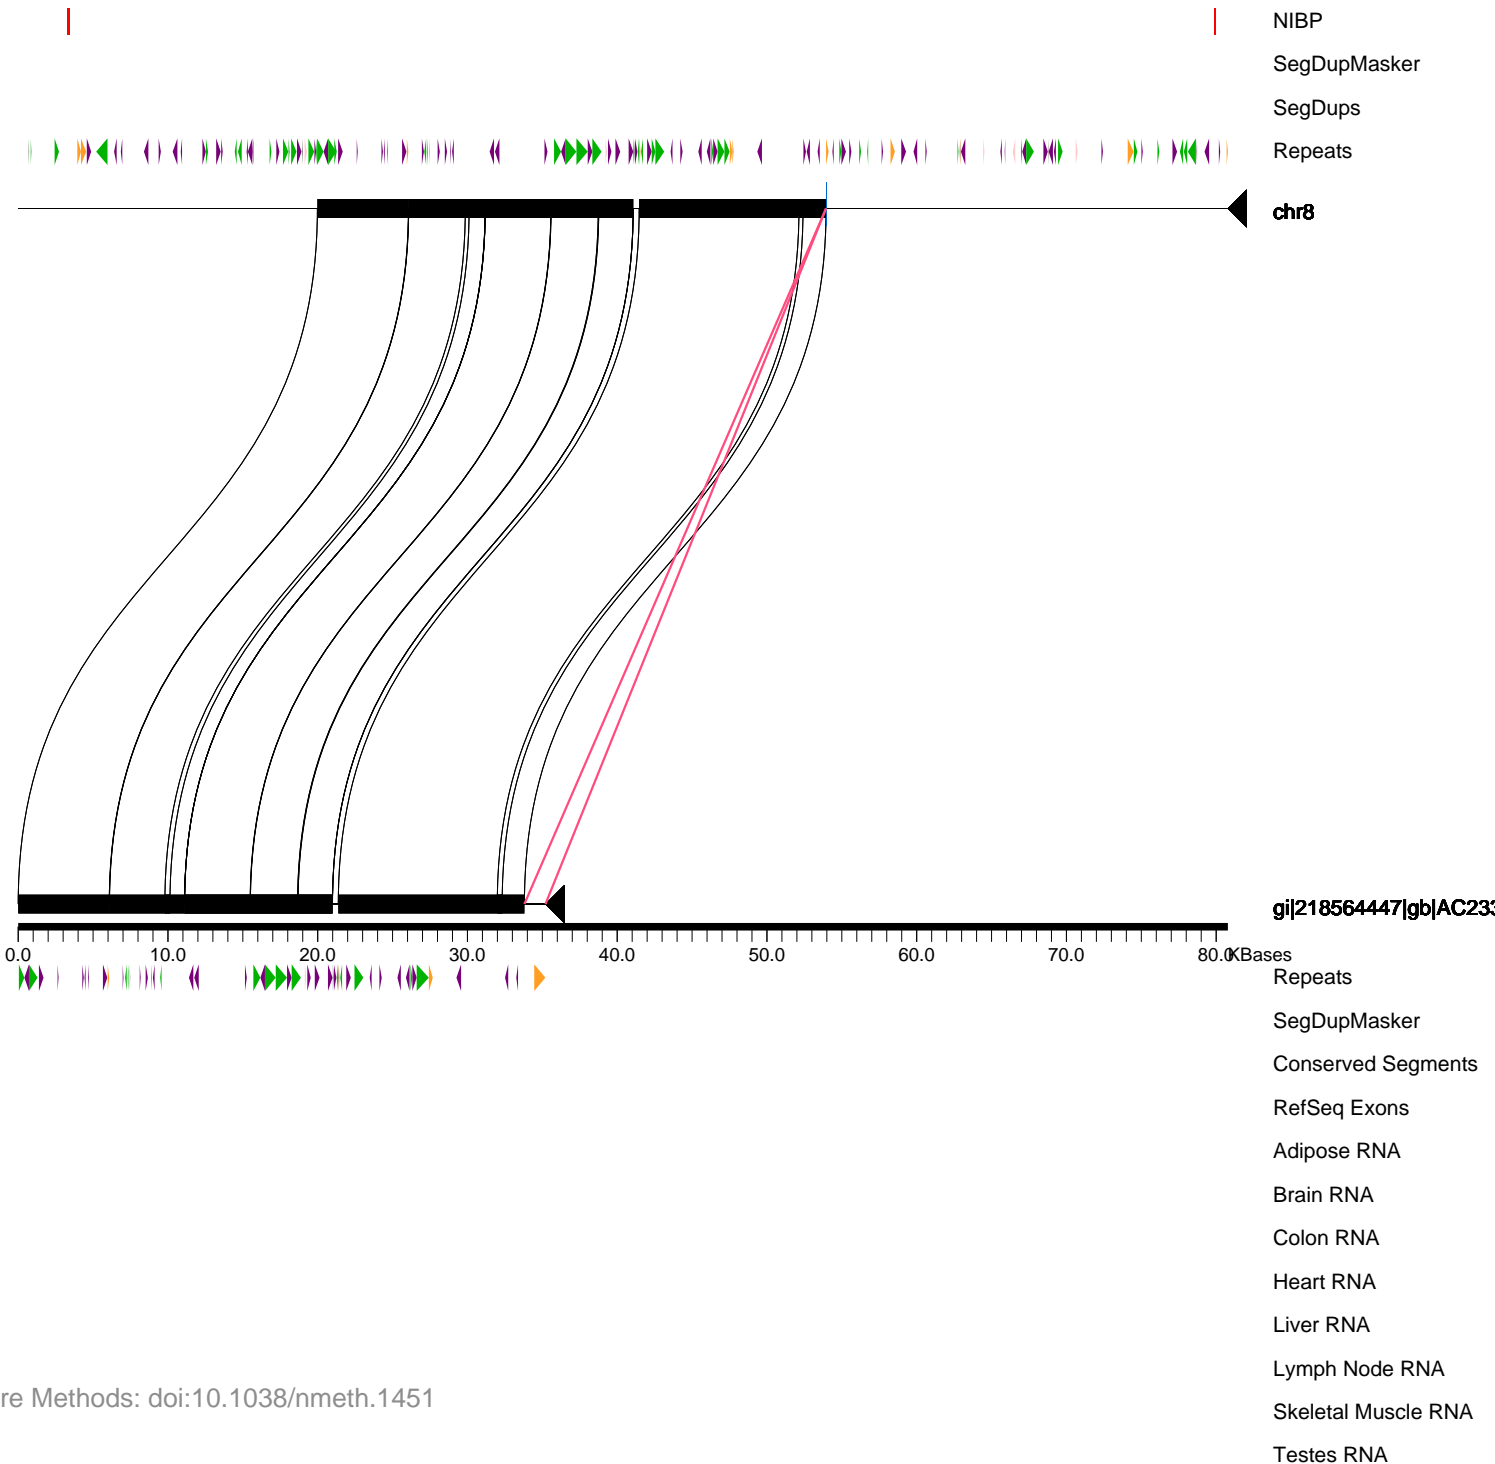

Clone file = AC233753.rc.fa

Insertion Size: 1311

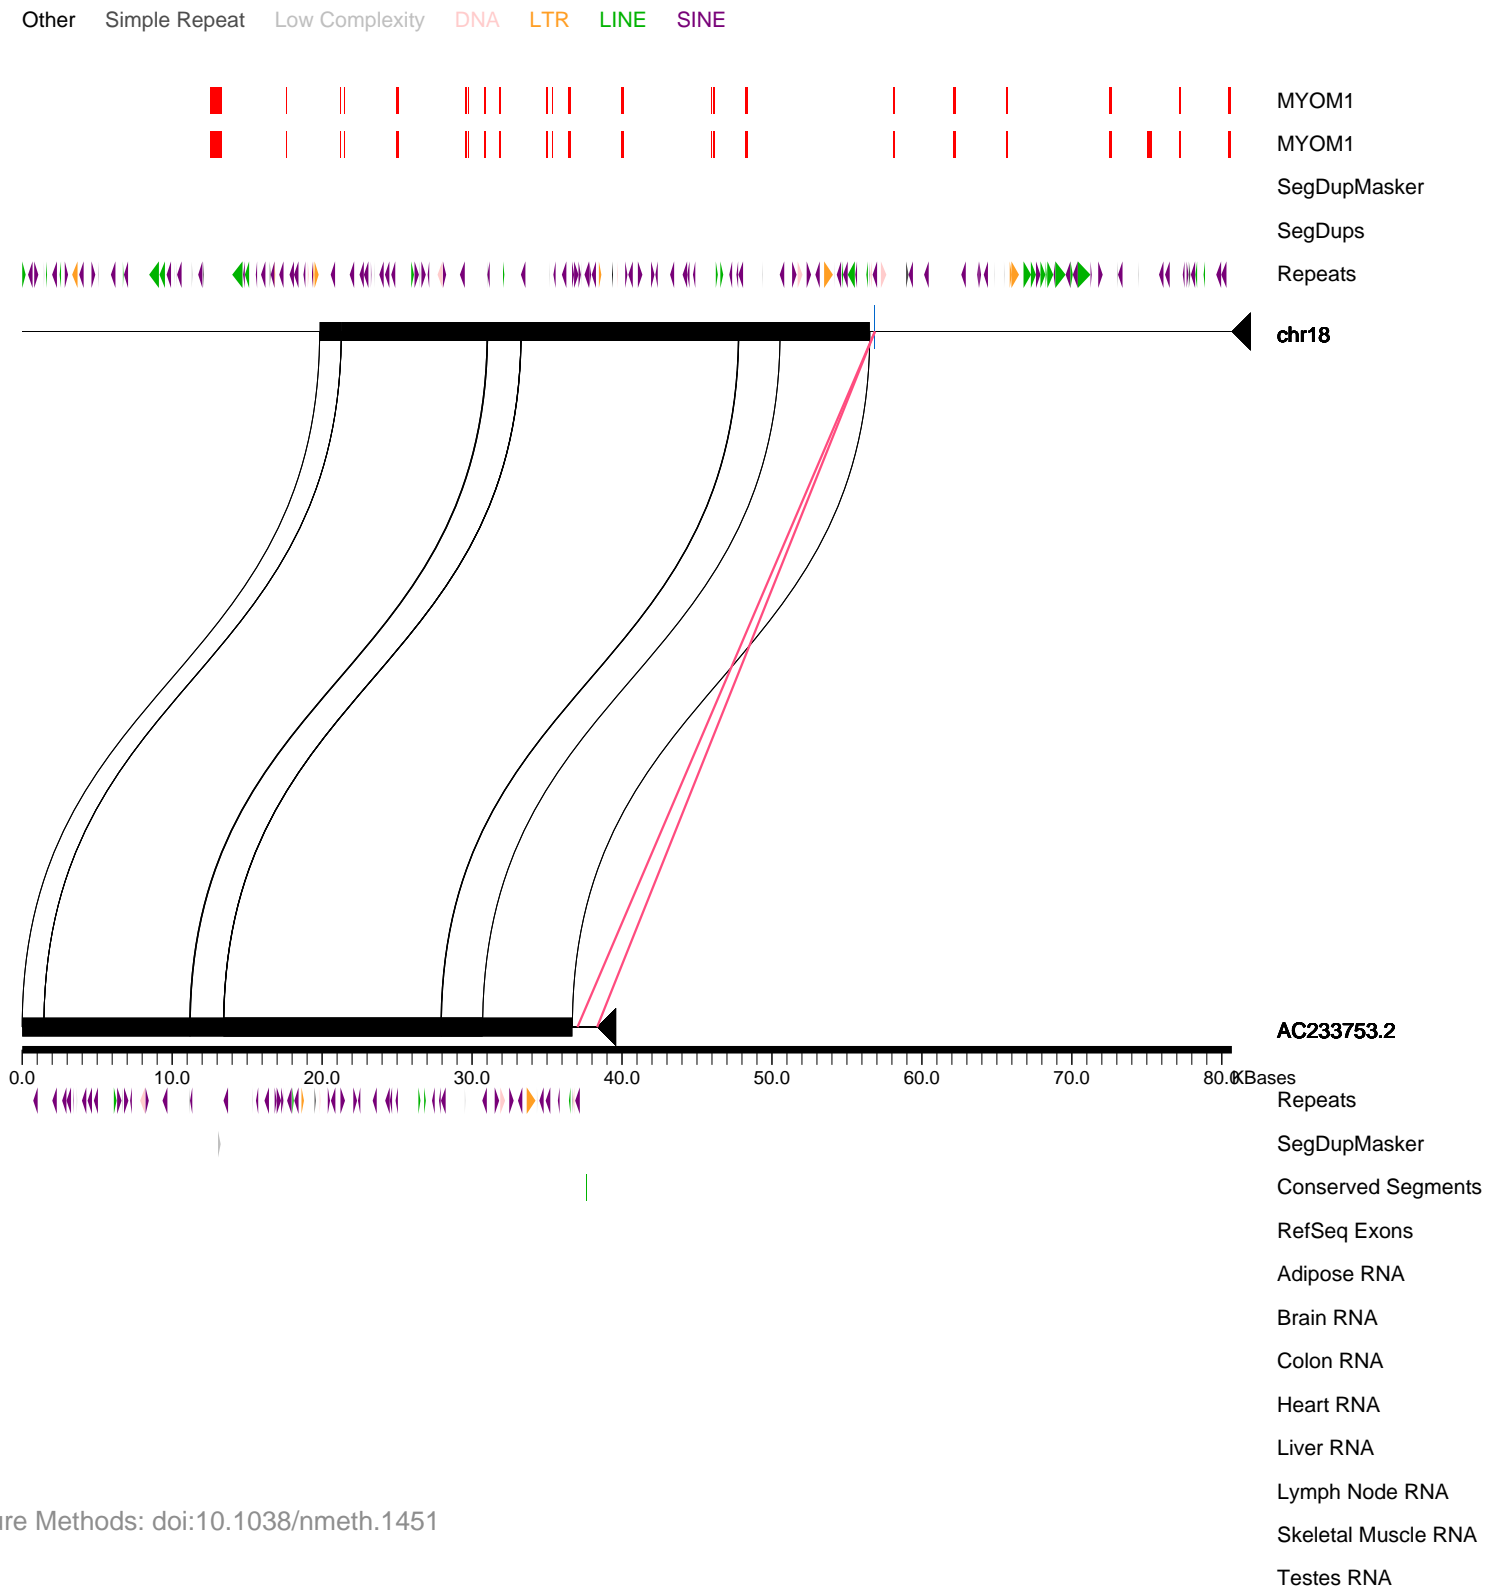

Clone file = AC233754.fa

Insertion Size: 30268

Other Simple Repeat Low Complexity DNA LTR LINE SINE

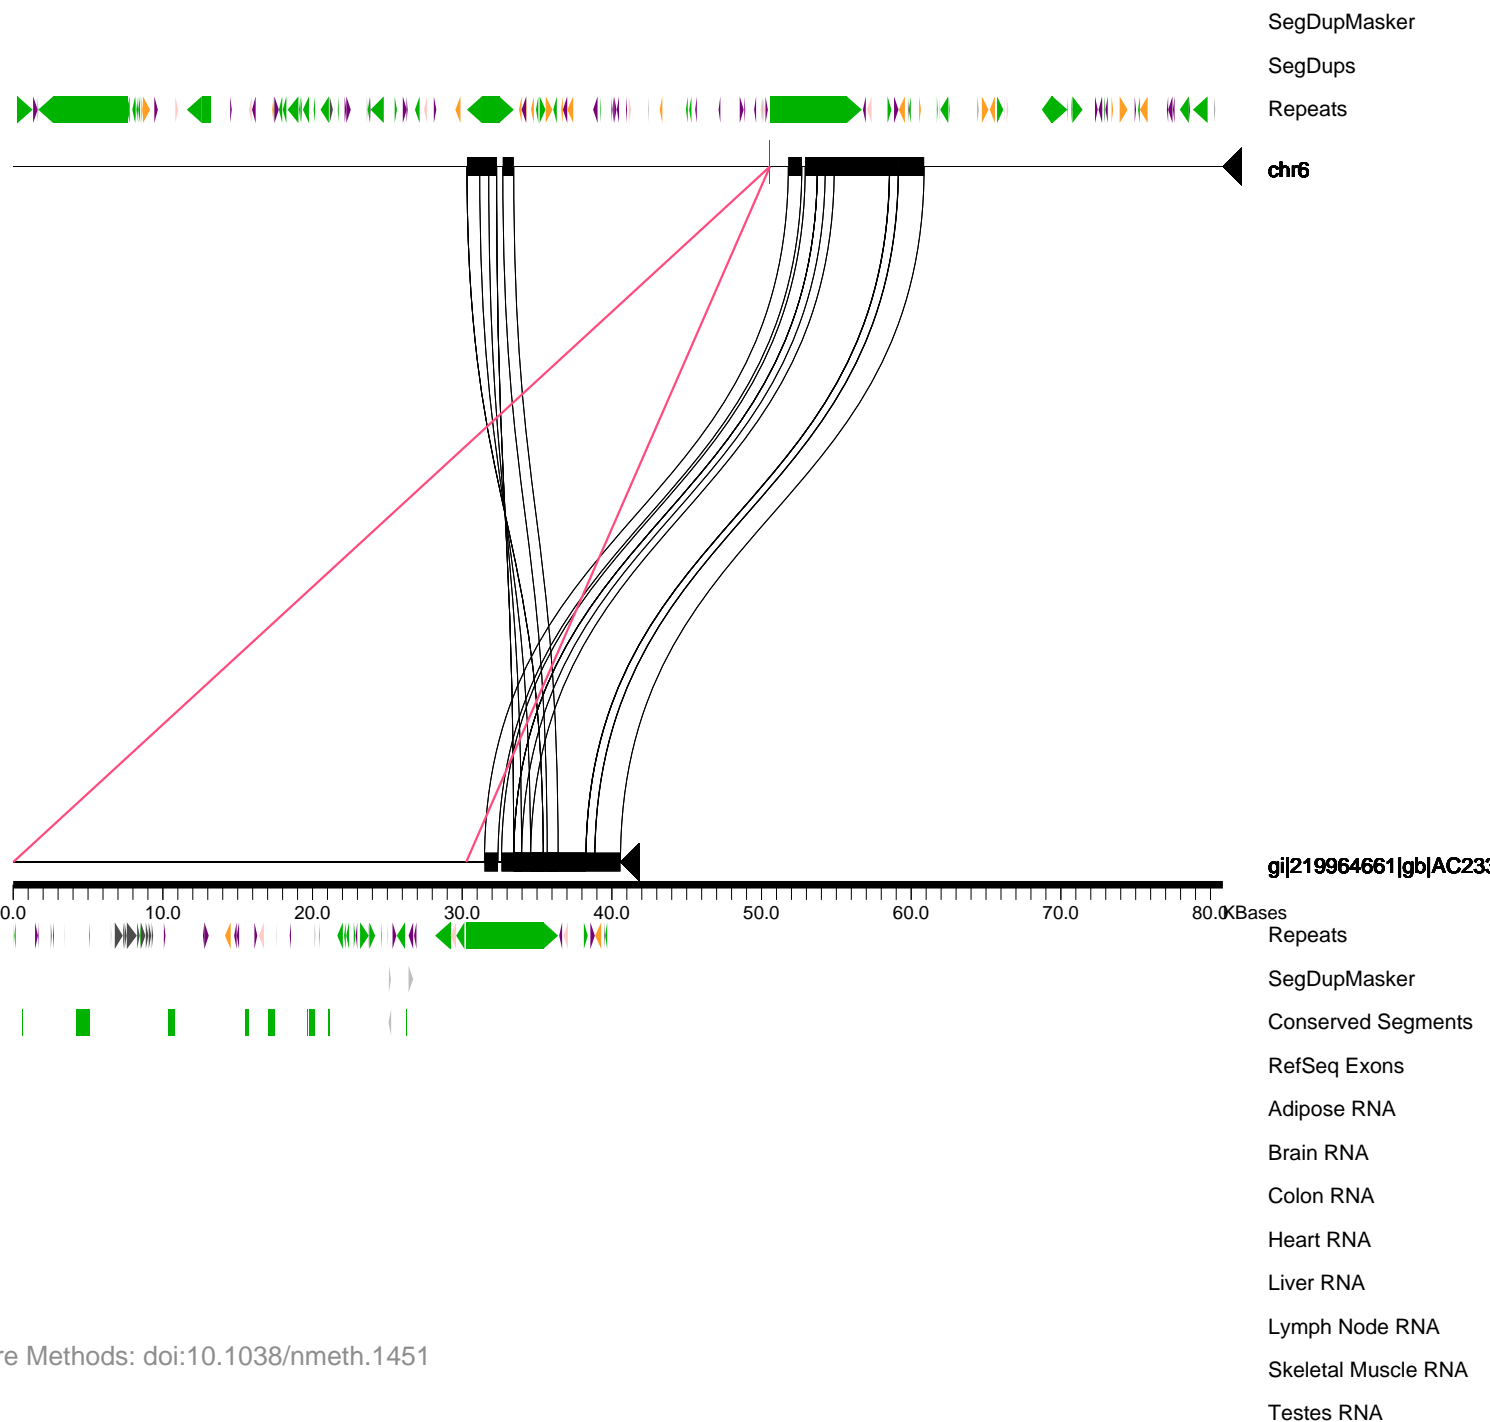

Clone file = AC233755.rc.fa

Insertion Size: 10229

Other Simple Repeat Low Complexity DNA LTR LINE SINE

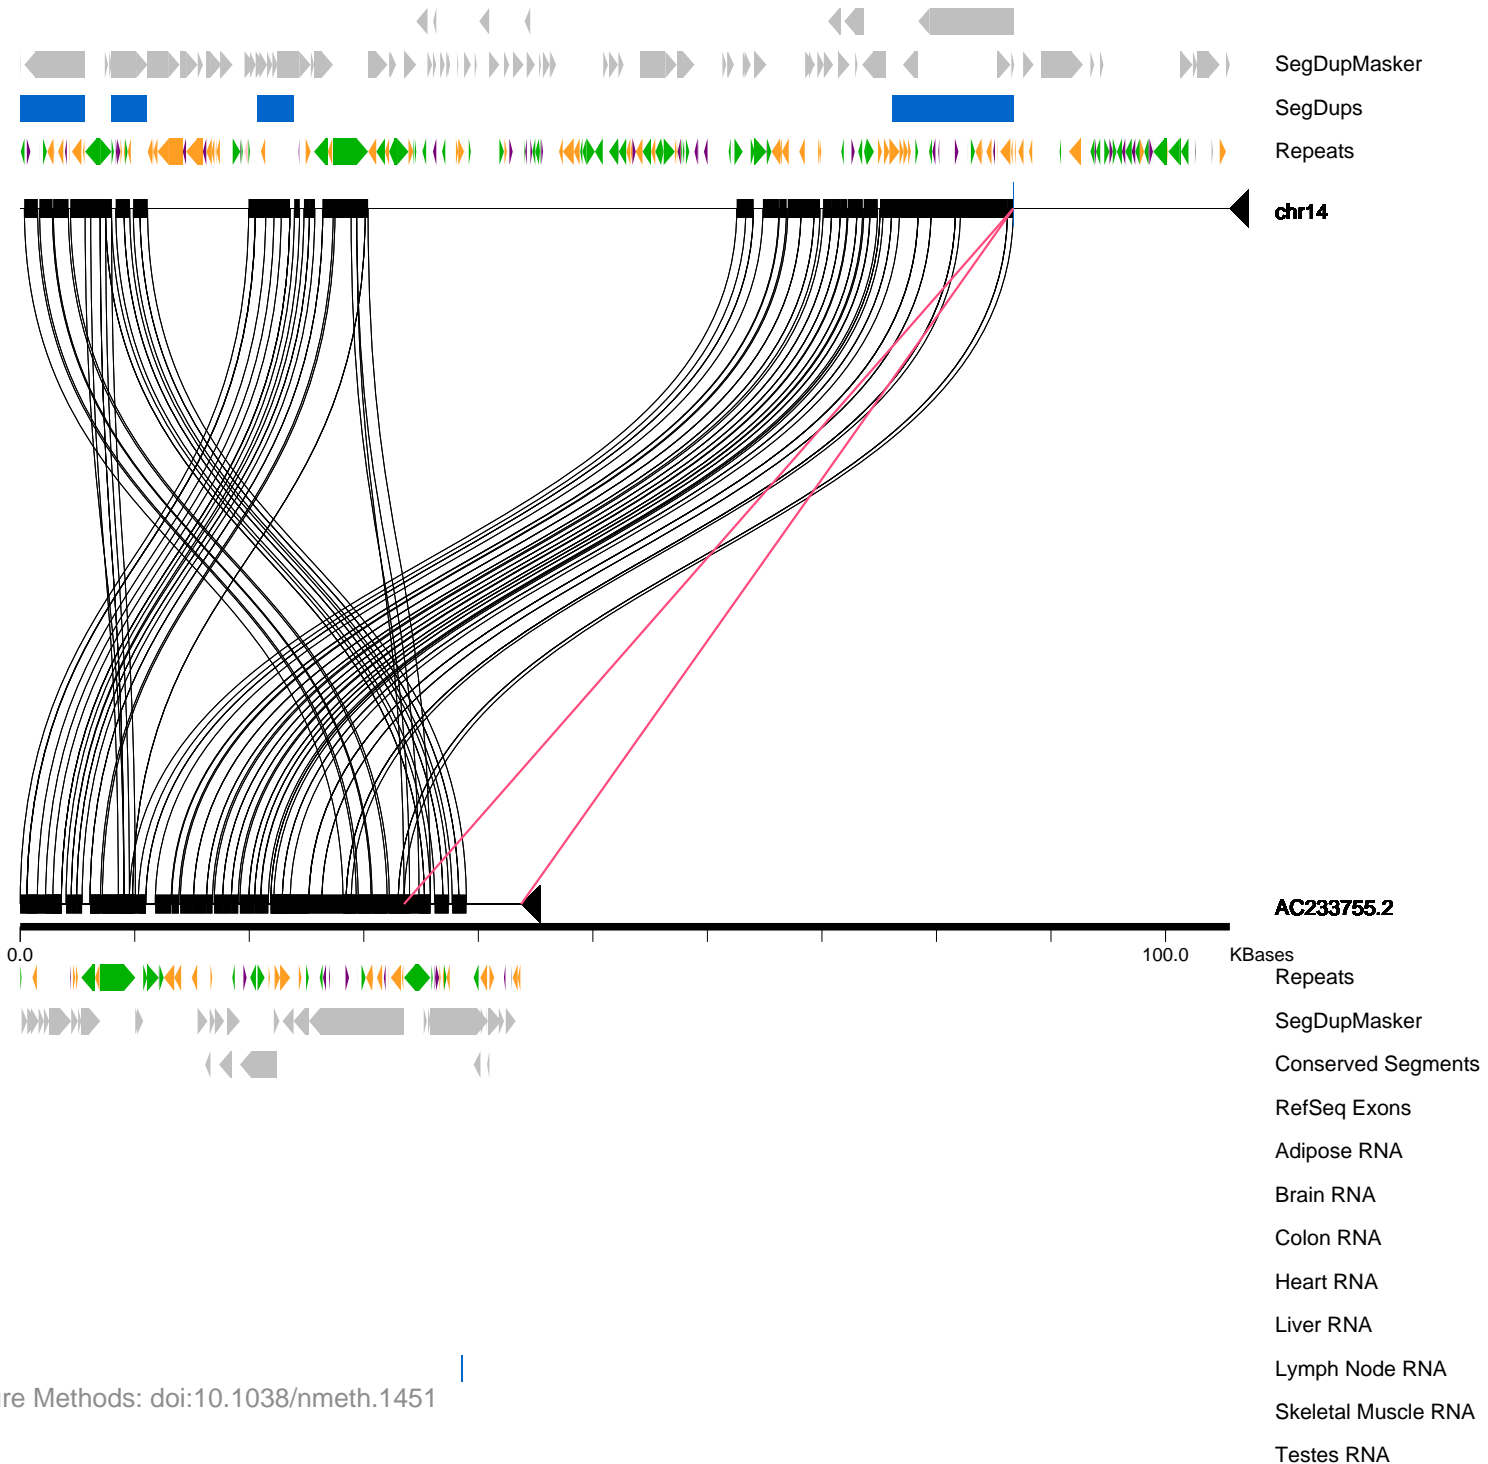

Clone file = AC233756.fa

Insertion Size: 3456

Other Simple Repeat Low Complexity DNA LTR LINE SINE

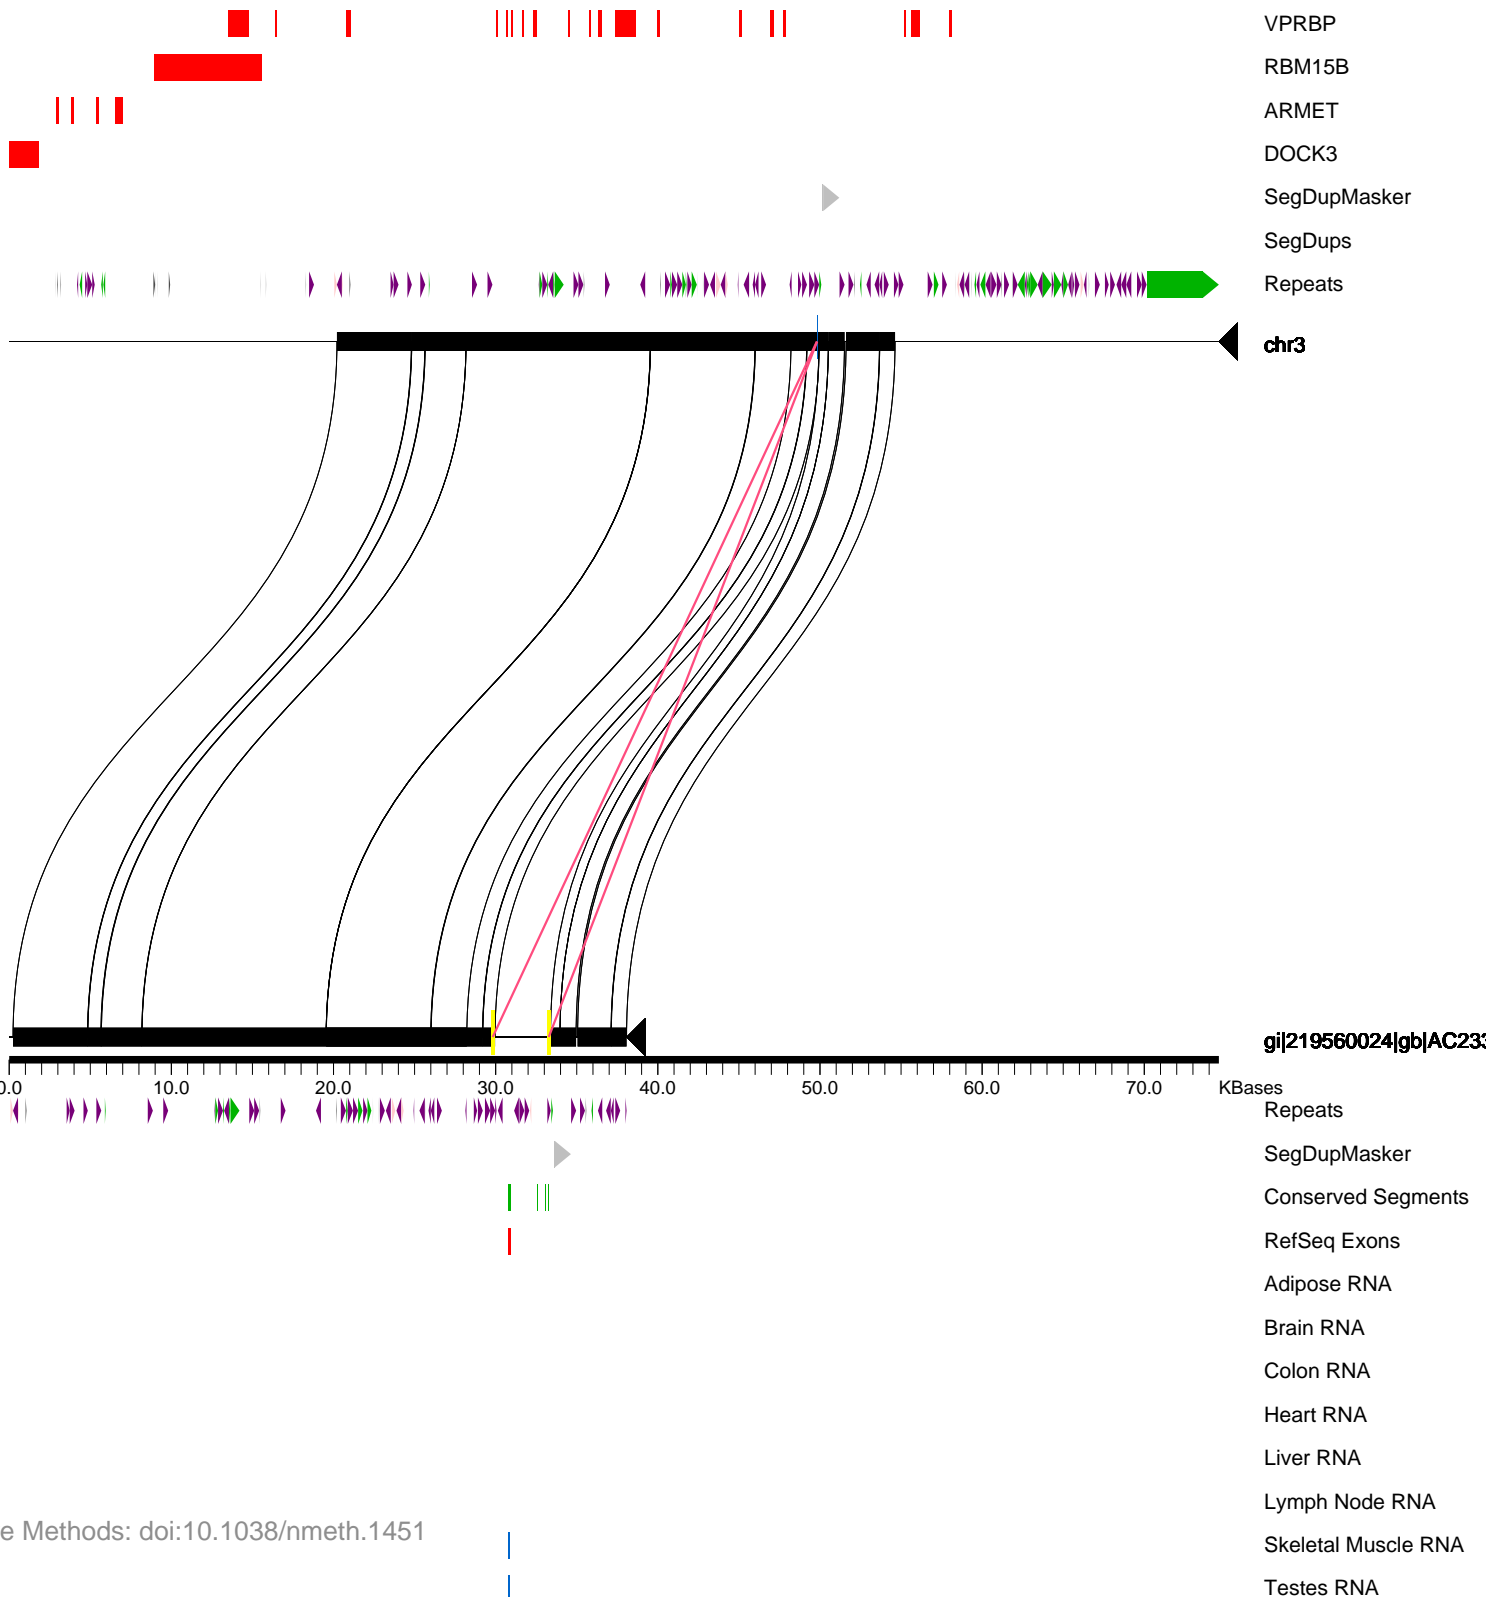

Clone file = AC233758.rc.fa

Insertion Size: 4258

Other Simple Repeat Low Complexity DNA LTR LINE SINE

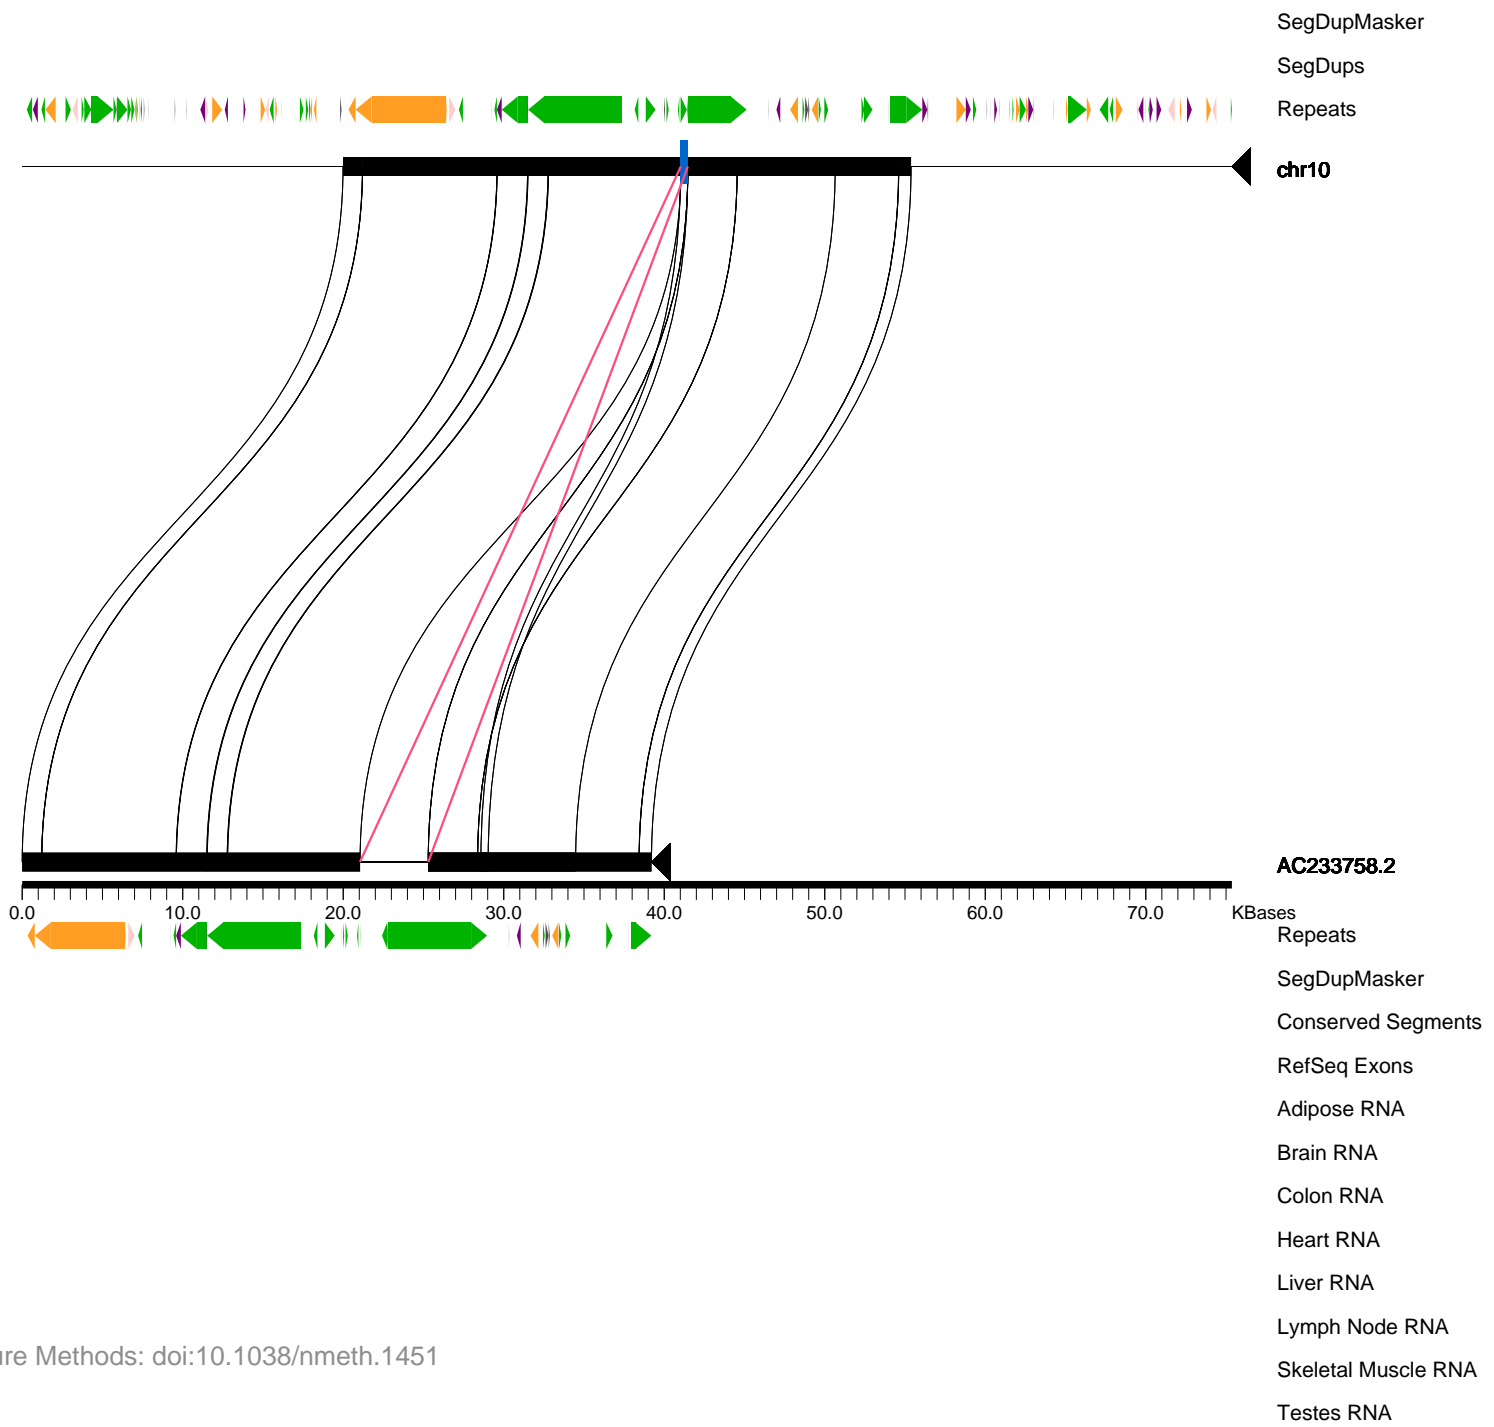

Clone file = AC233764.fa

Insertion Size: 37184

Other Simple Repeat Low Complexity DNA LTR LINE SINE

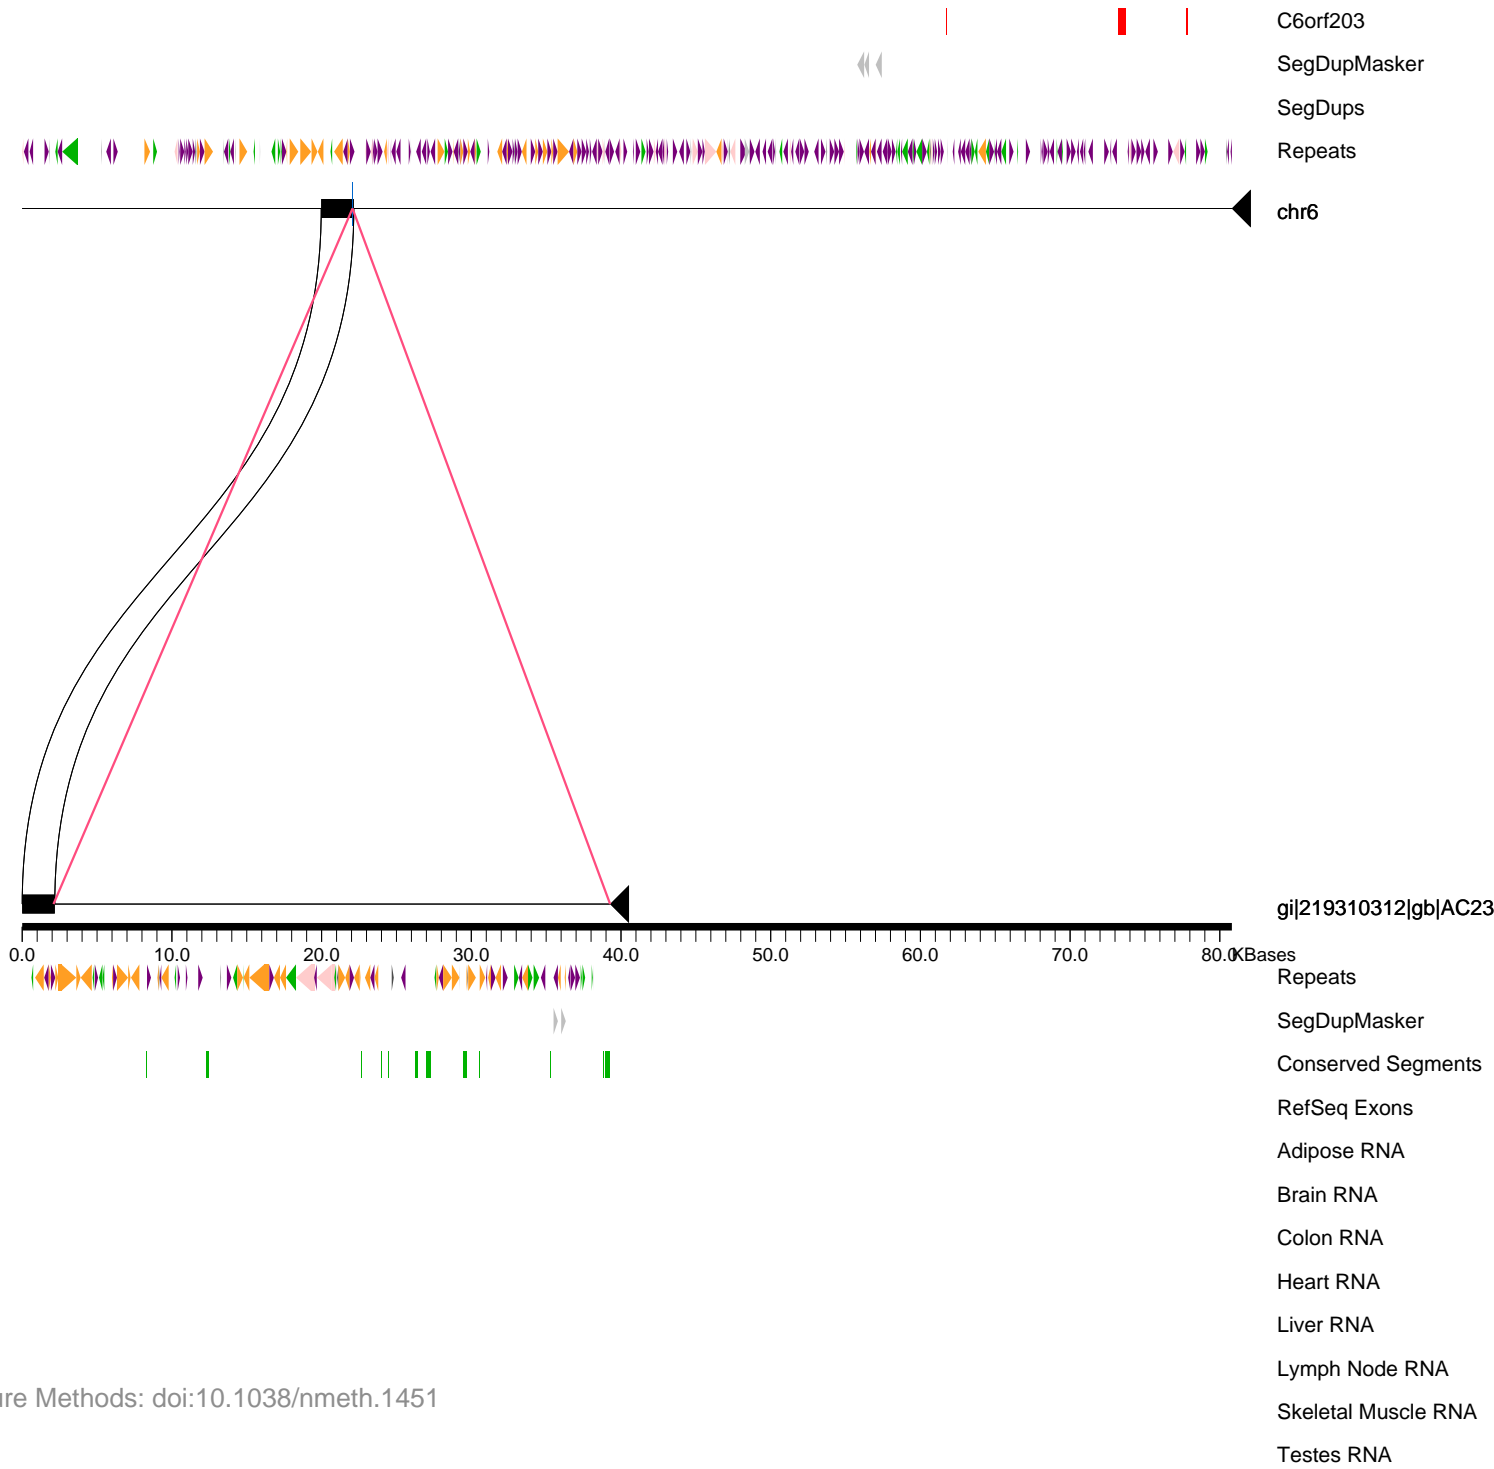

Clone file = AC233768.fa

Insertion Size: 1147

Other Simple Repeat Low Complexity DNA LTR LINE SINE

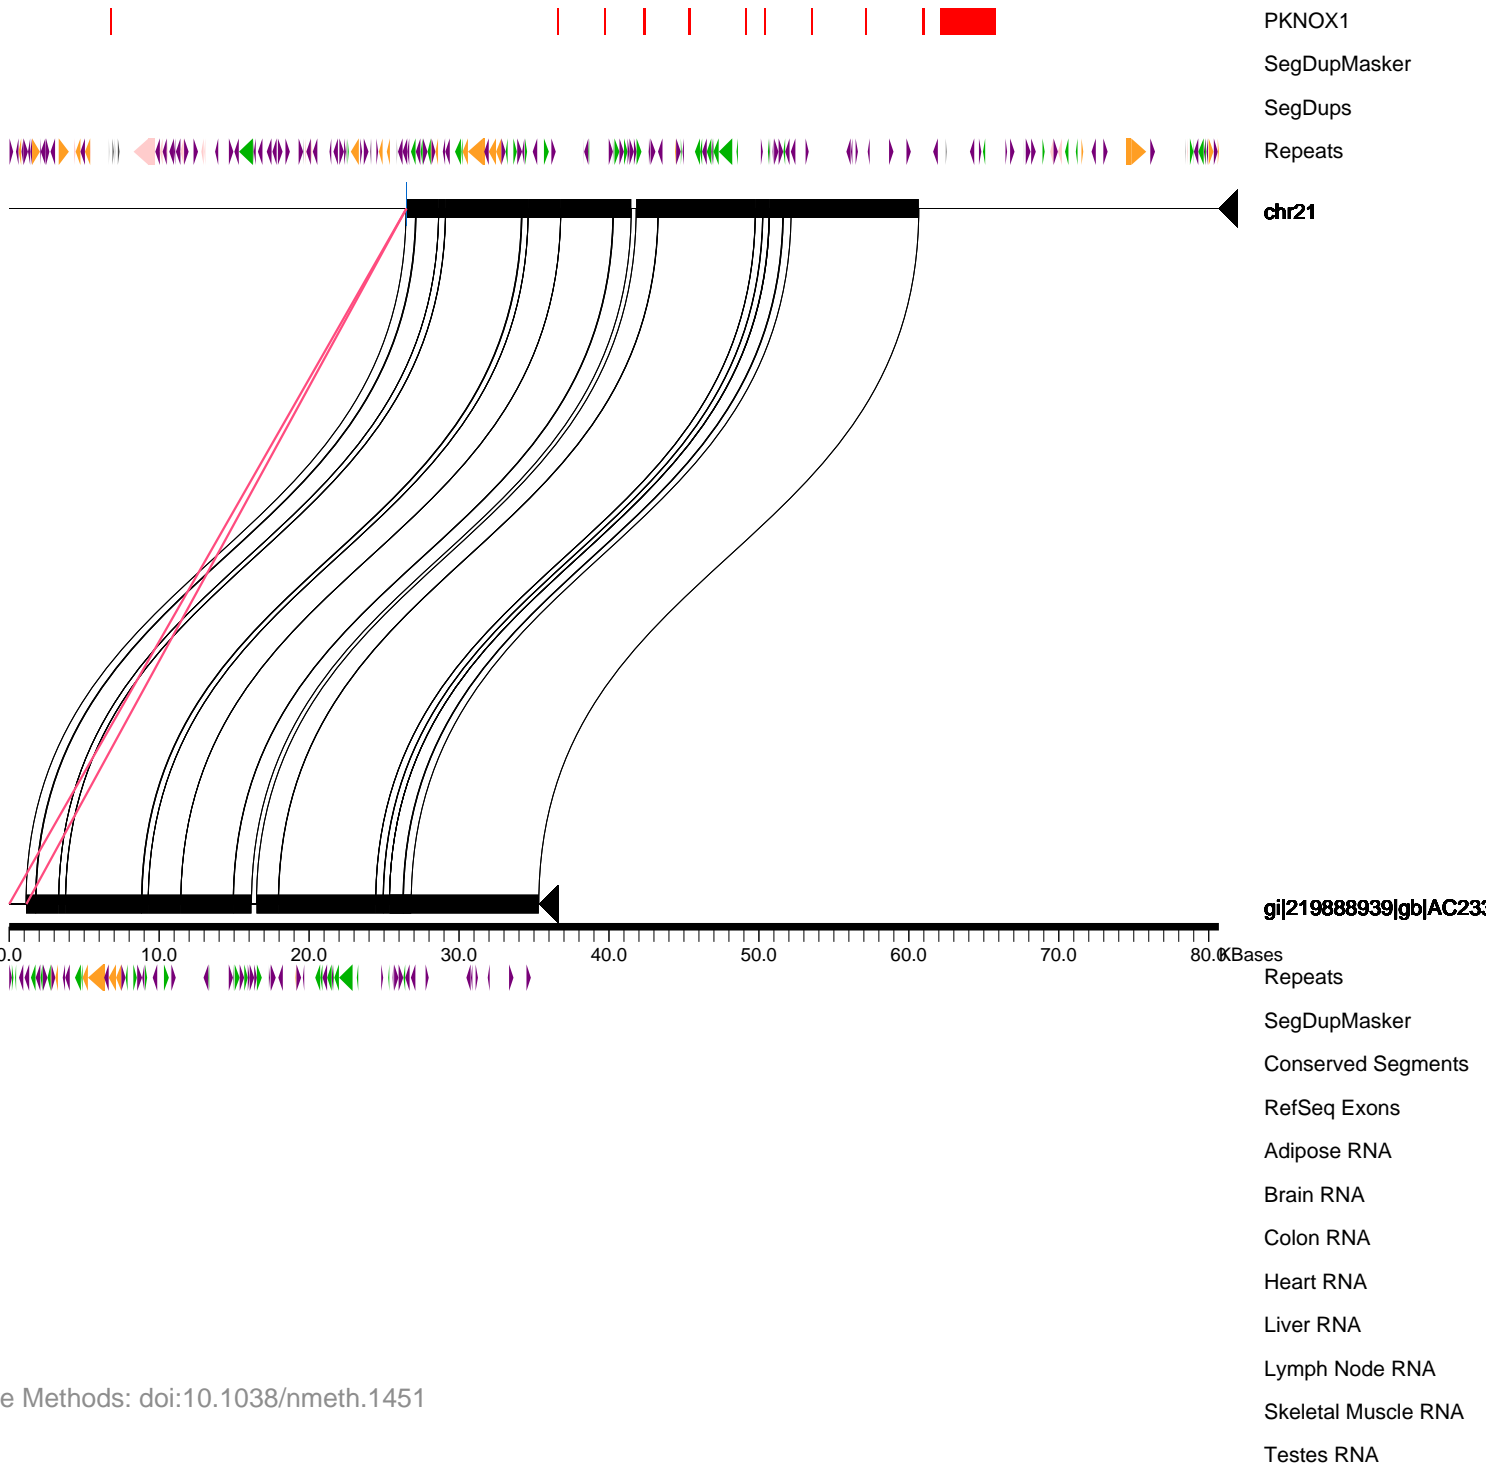



Clone file = AC234039.rc.fa

Insertion Size: 33226

Other Simple Repeat Low Complexity DNA LTR LINE SINE

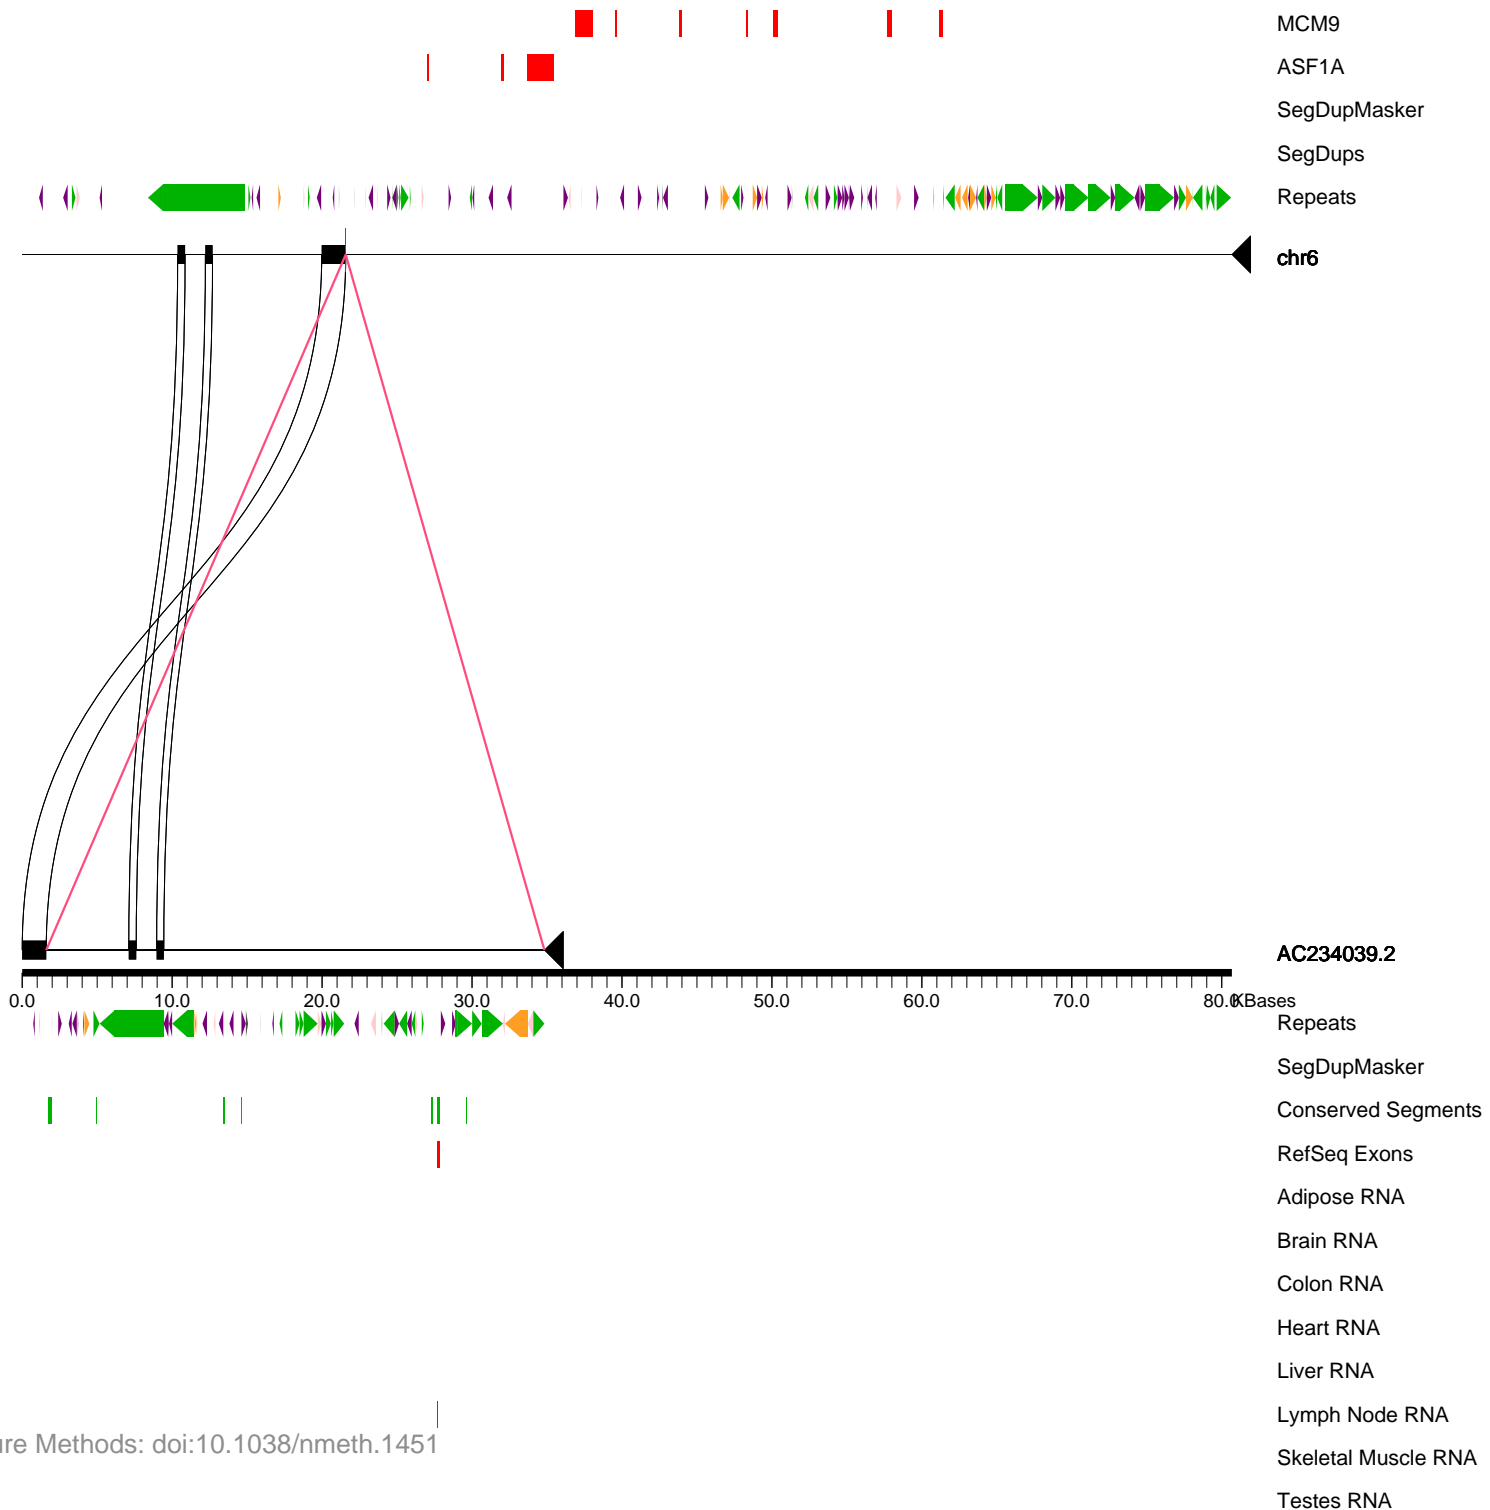

Clone file = AC234142.fa

Insertion Size: 2576

Other Simple Repeat Low Complexity DNA LTR LINE SINE

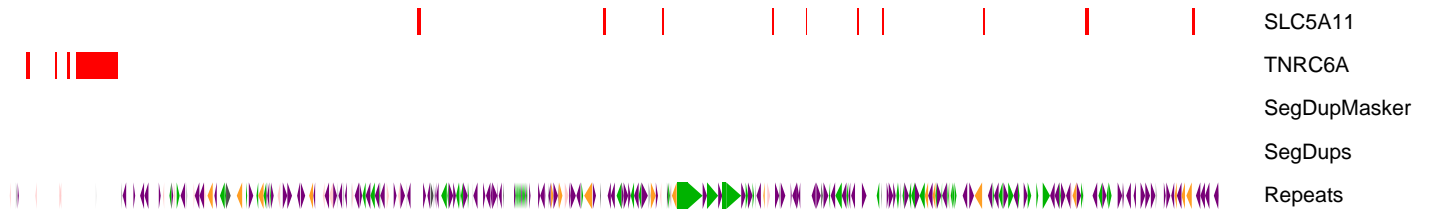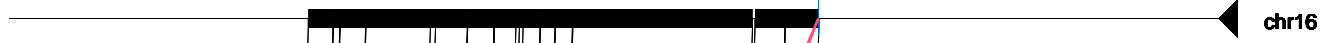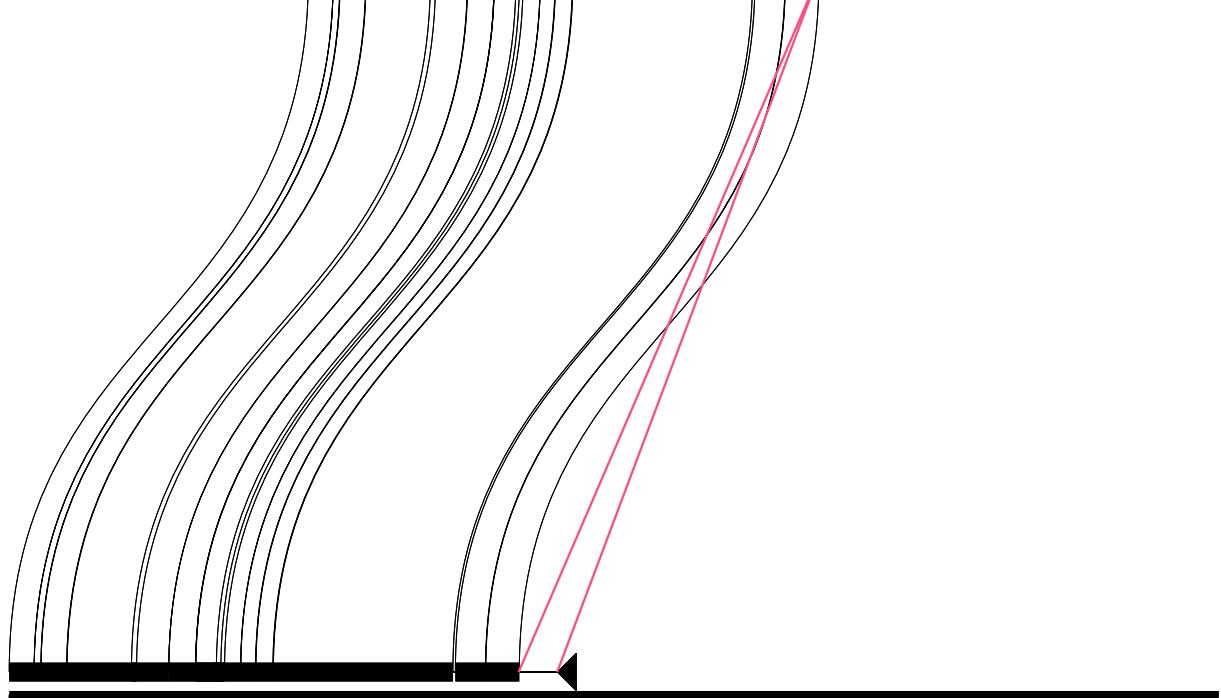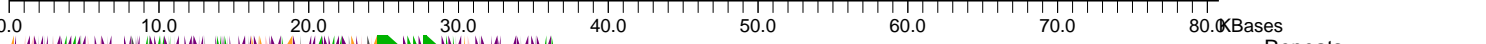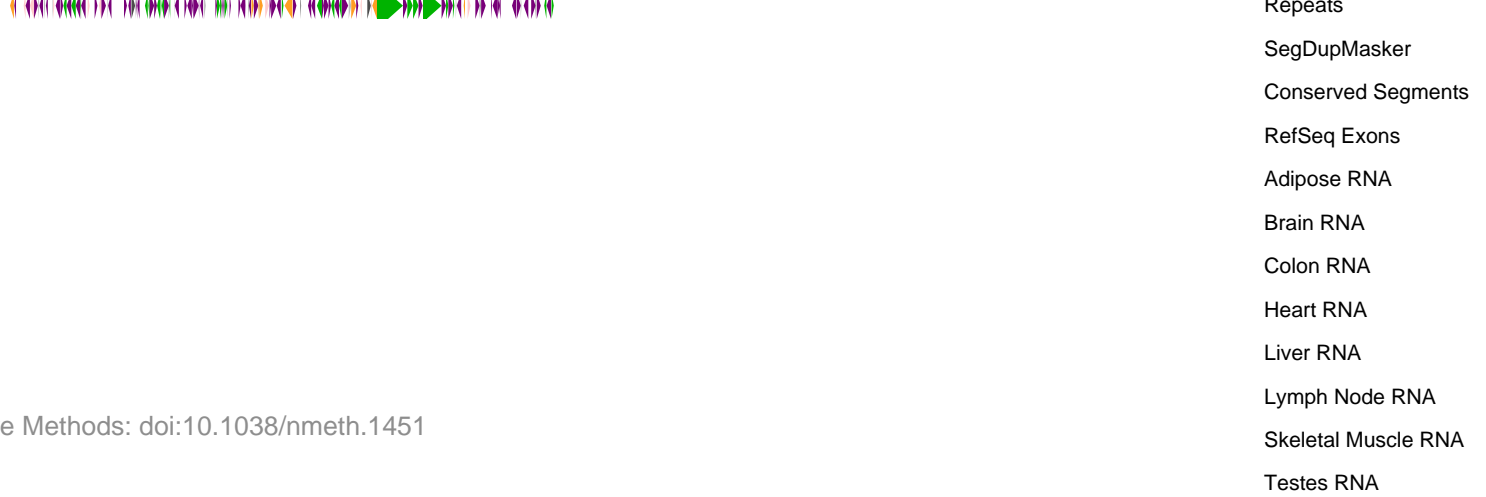

Clone file = AC234230.rc.fa

Insertion Size: 9071

Other Simple Repeat Low Complexity DNA LTR LINE SINE

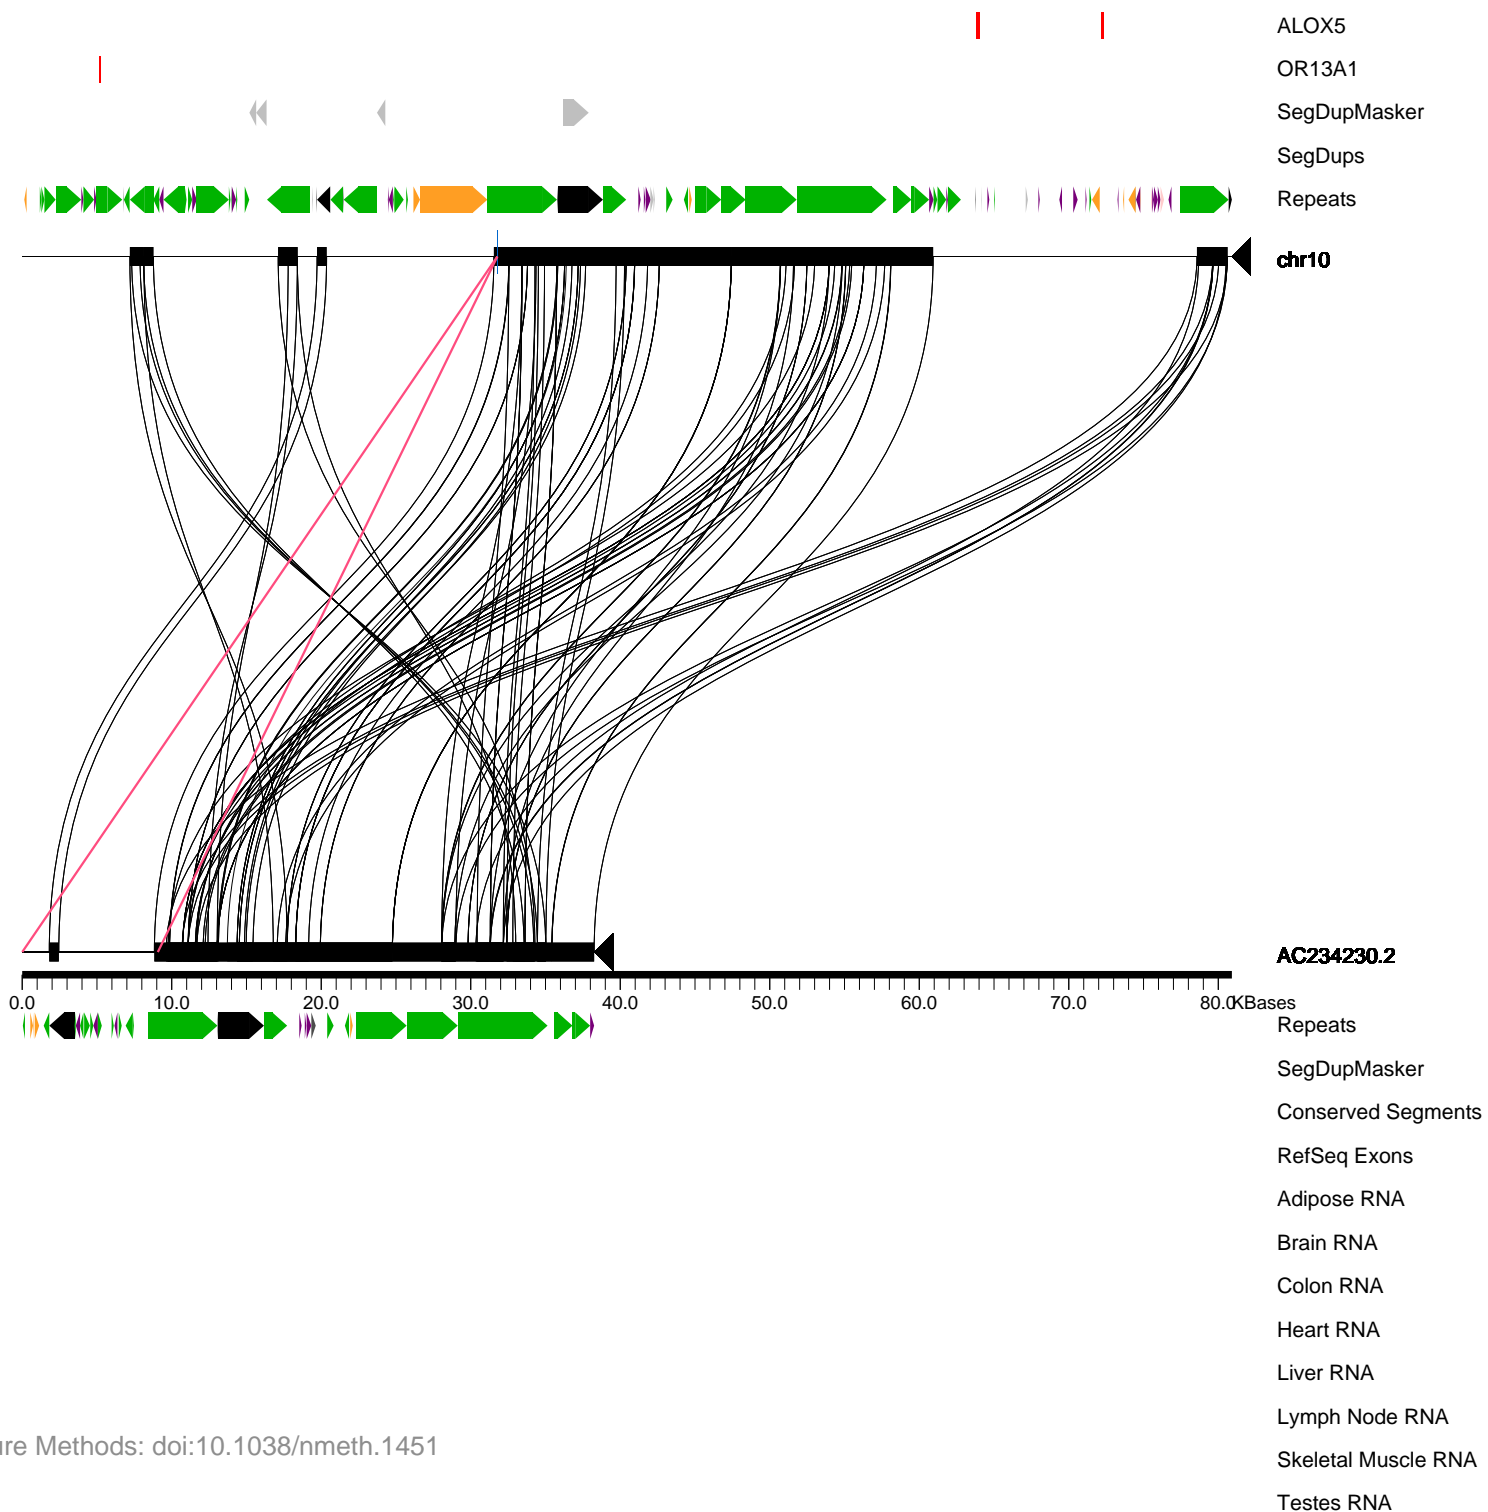



Clone file = AC234305.fa

Insertion Size: 16052

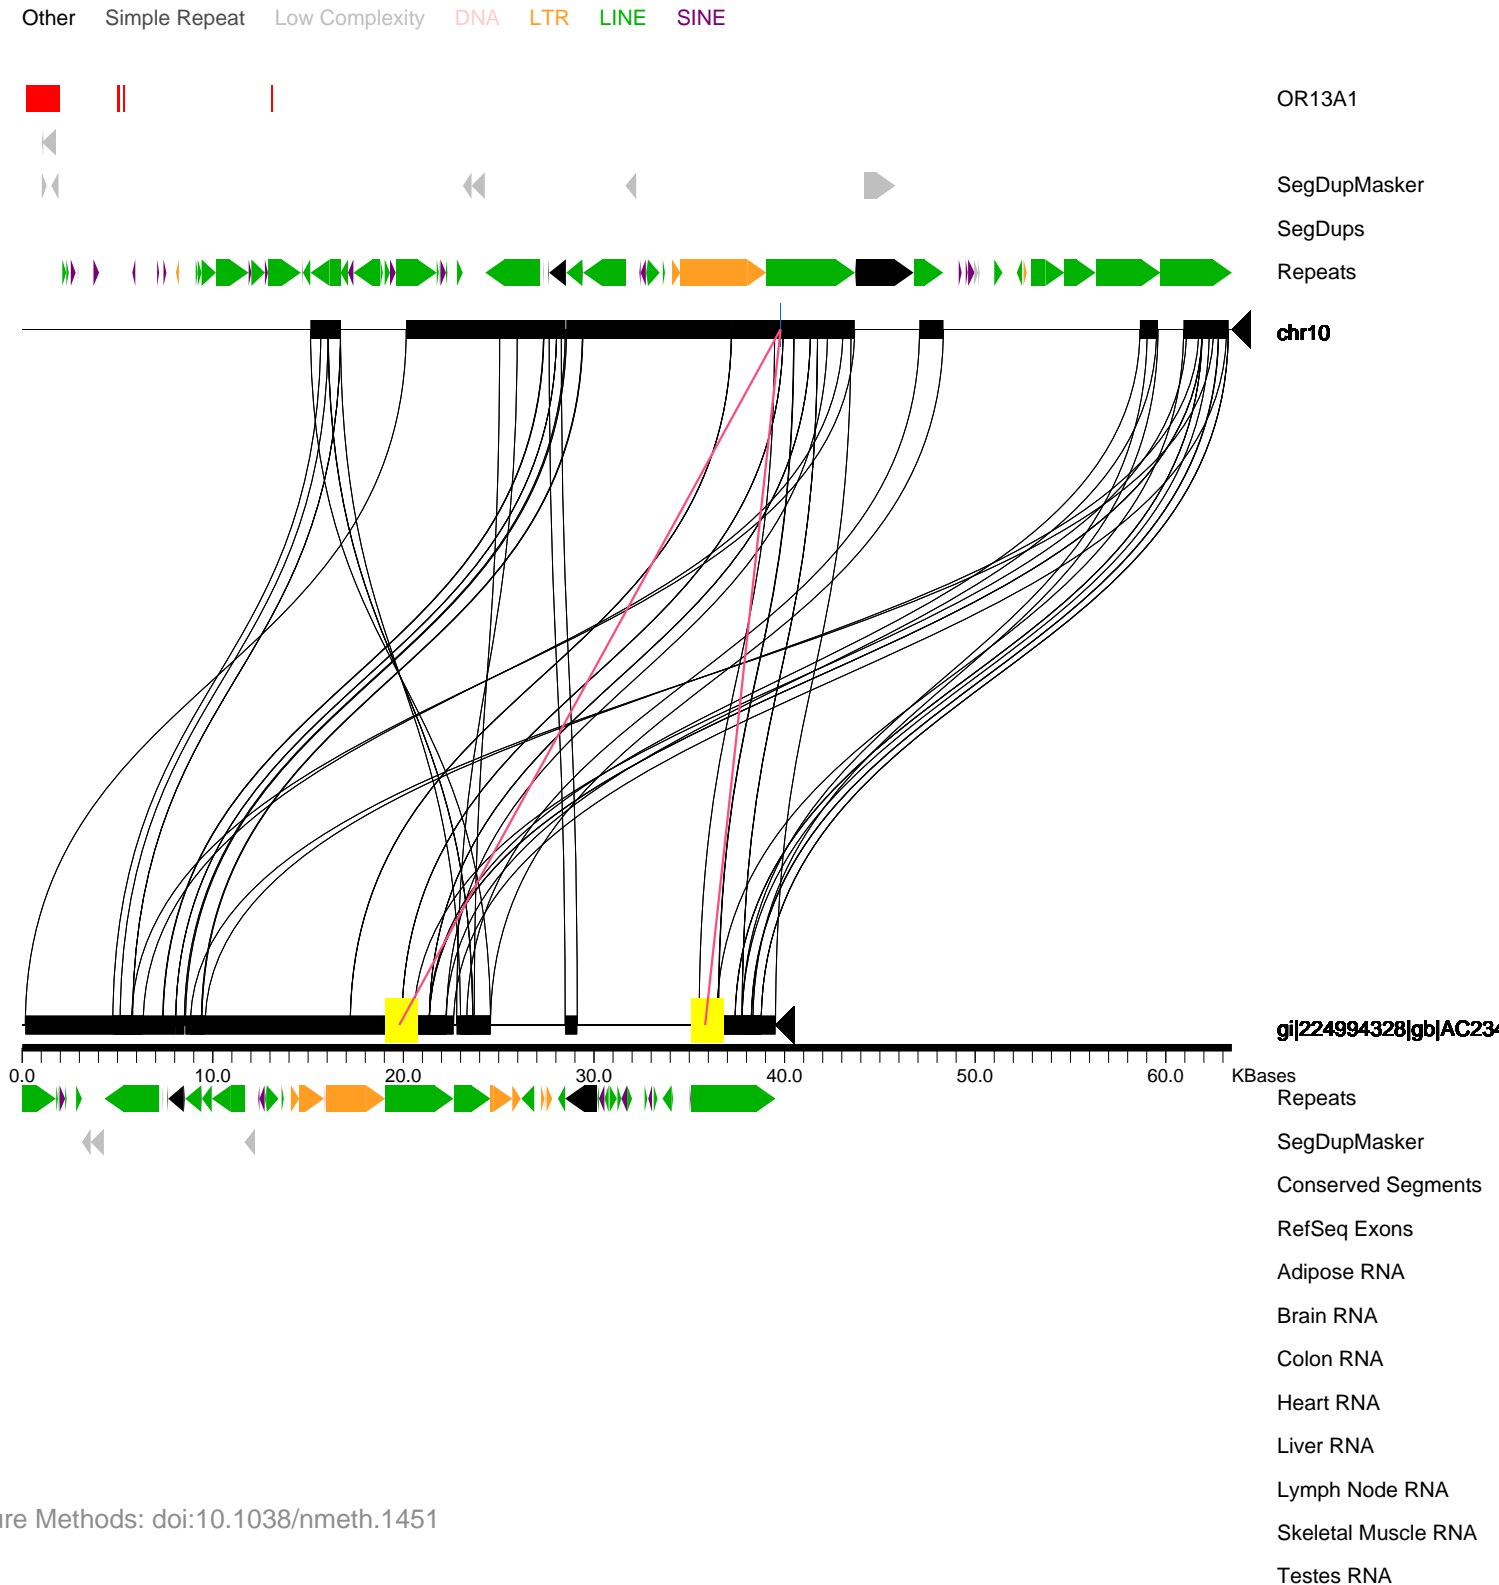

Clone file = AC234425.fa

Insertion Size: 2340

Other Simple Repeat Low Complexity DNA LTR LINE SINE

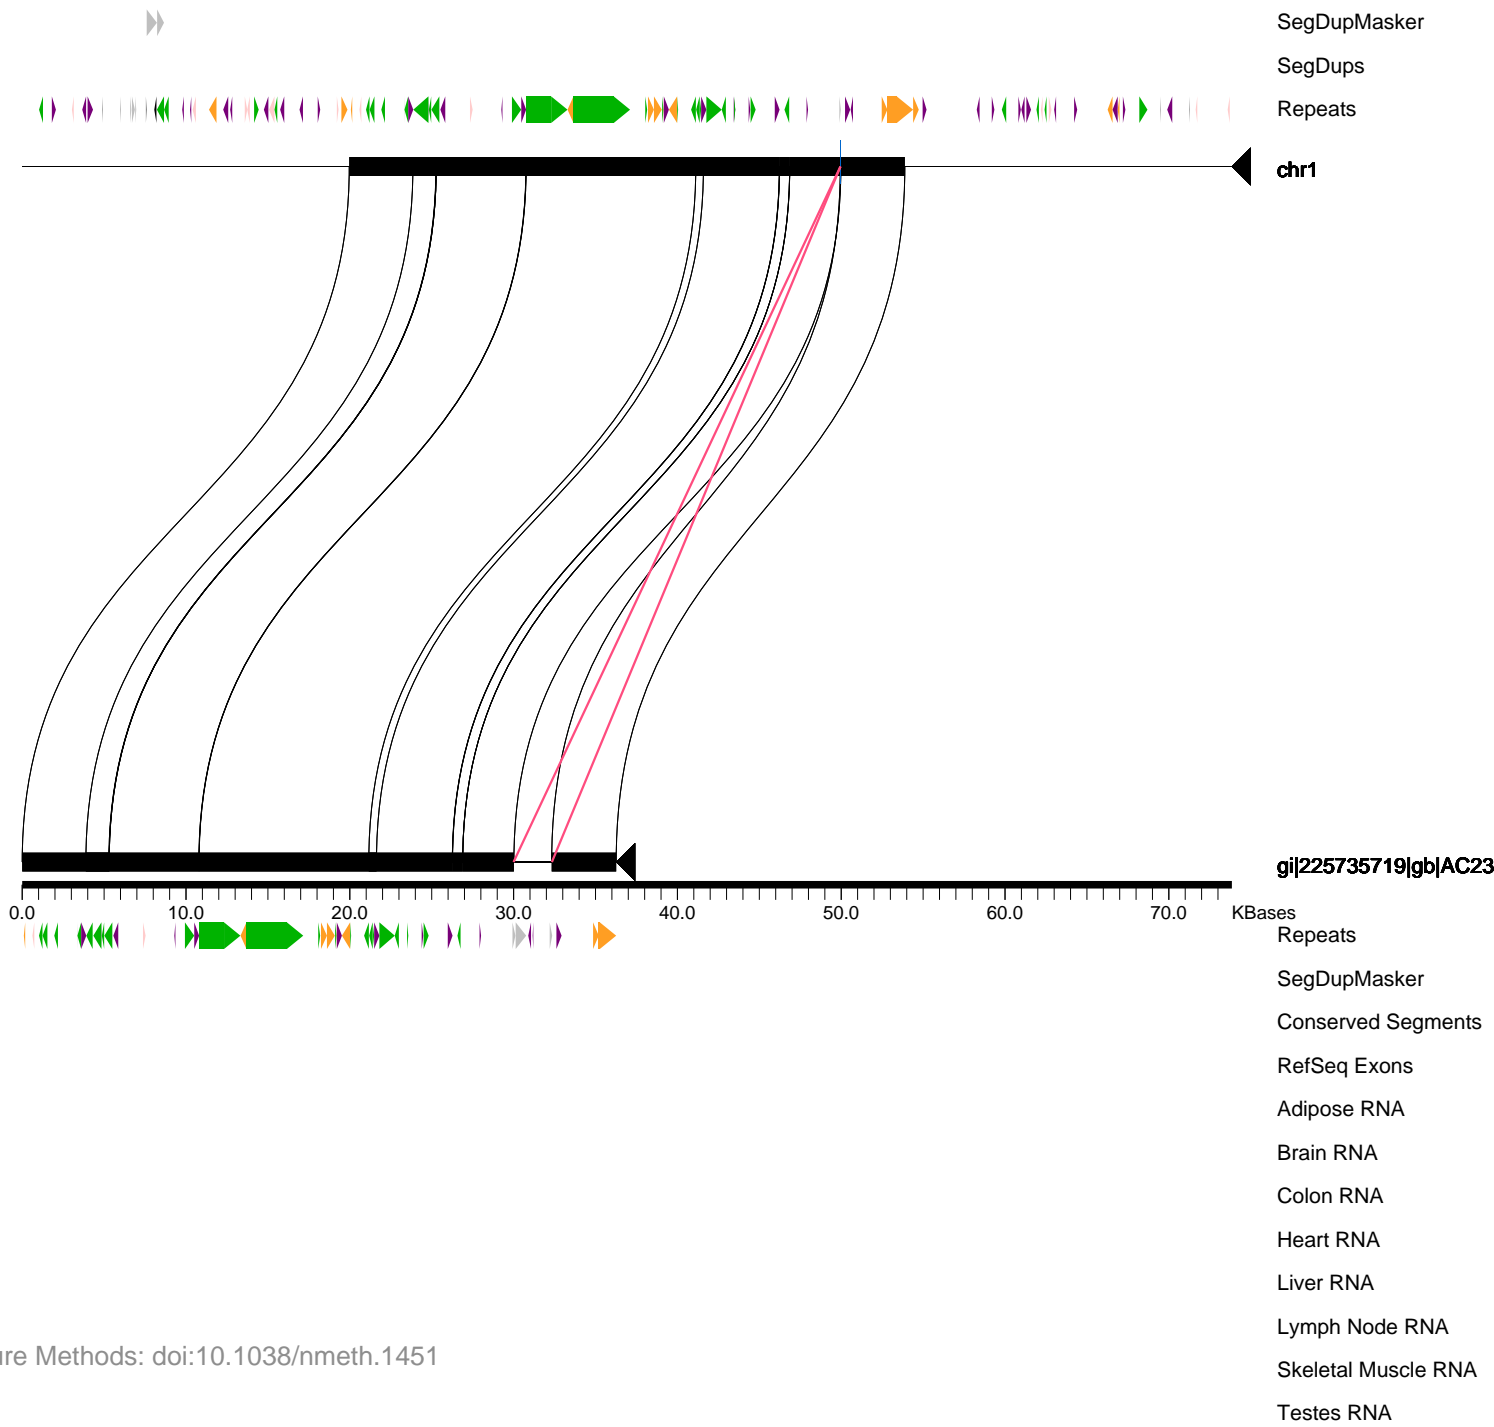

Clone file = AC234851.fa

Insertion Size: 8133

Other Simple Repeat Low Complexity DNA LTR LINE SINE

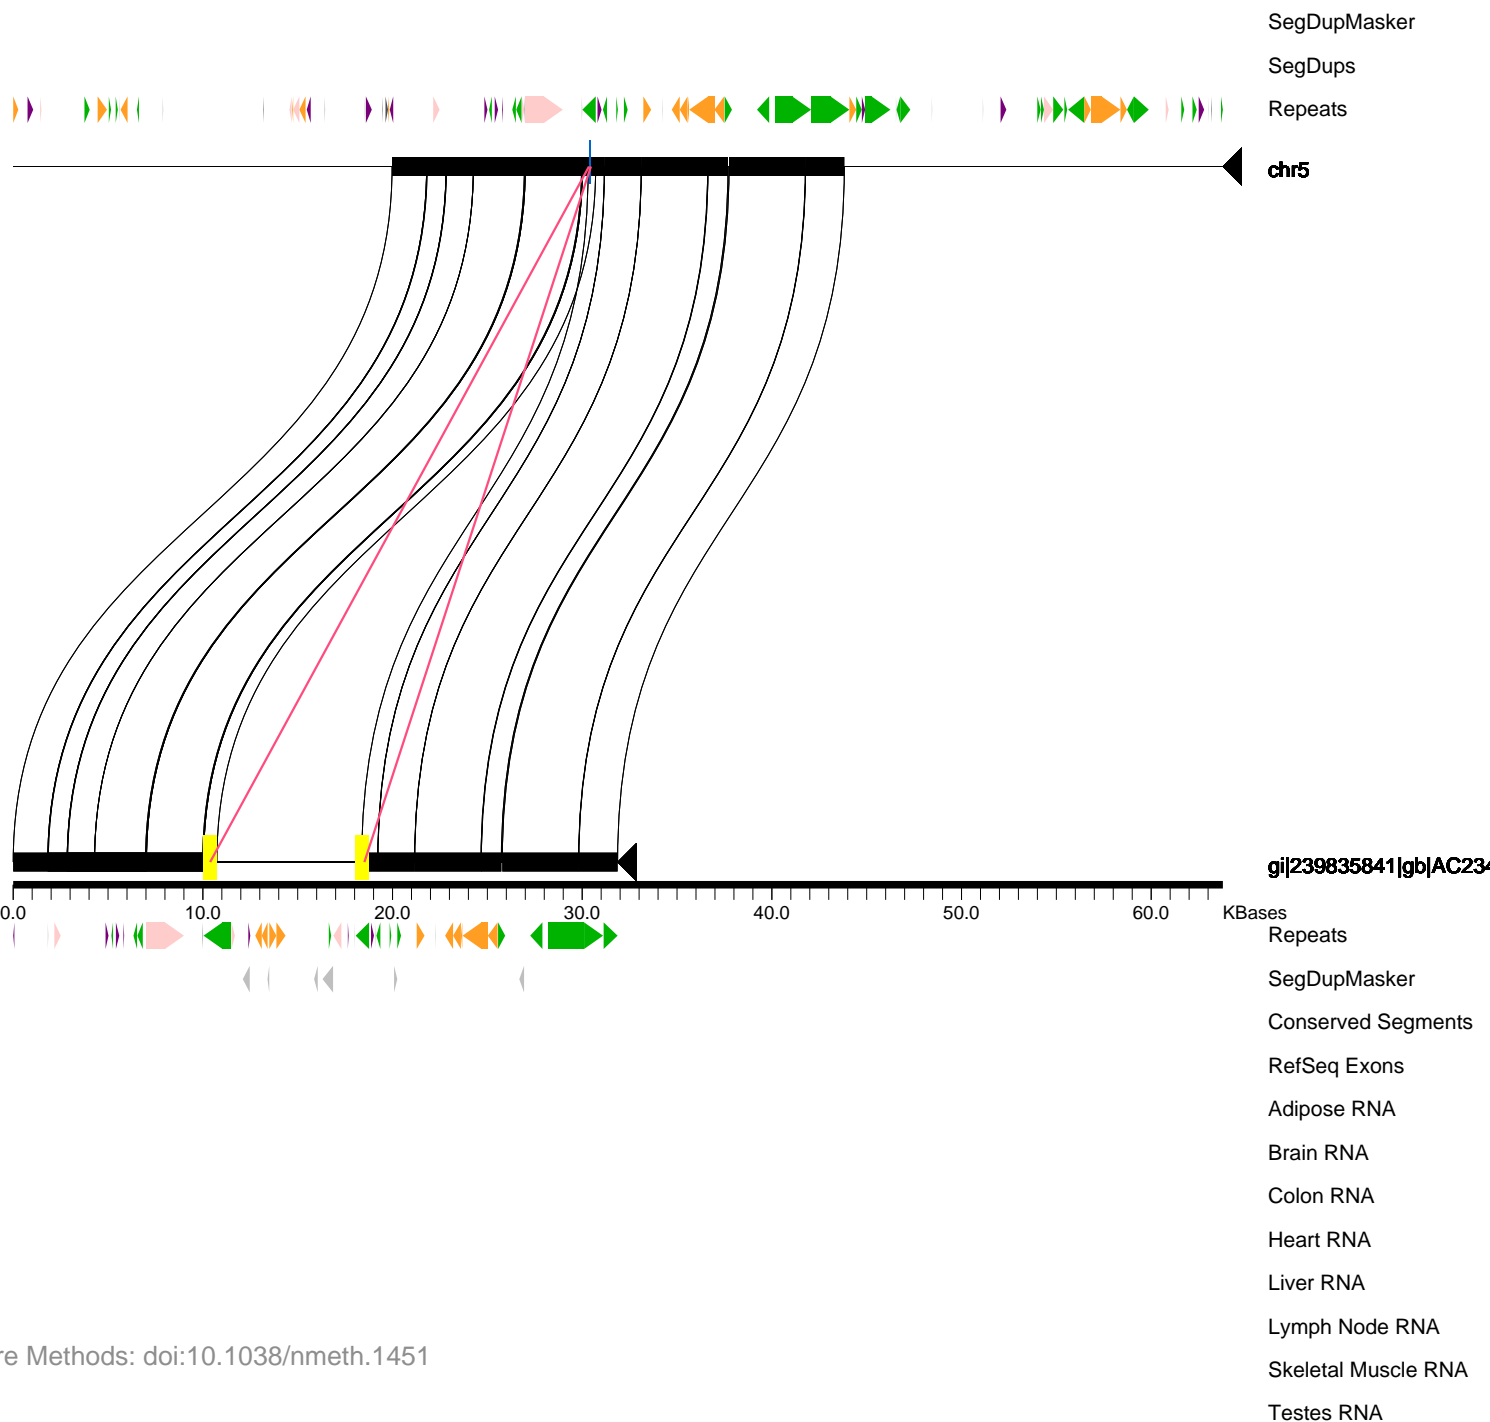

Clone file = AC234852.fa

Insertion Size: 7000

Other Simple Repeat Low Complexity DNA LTR LINE SINE

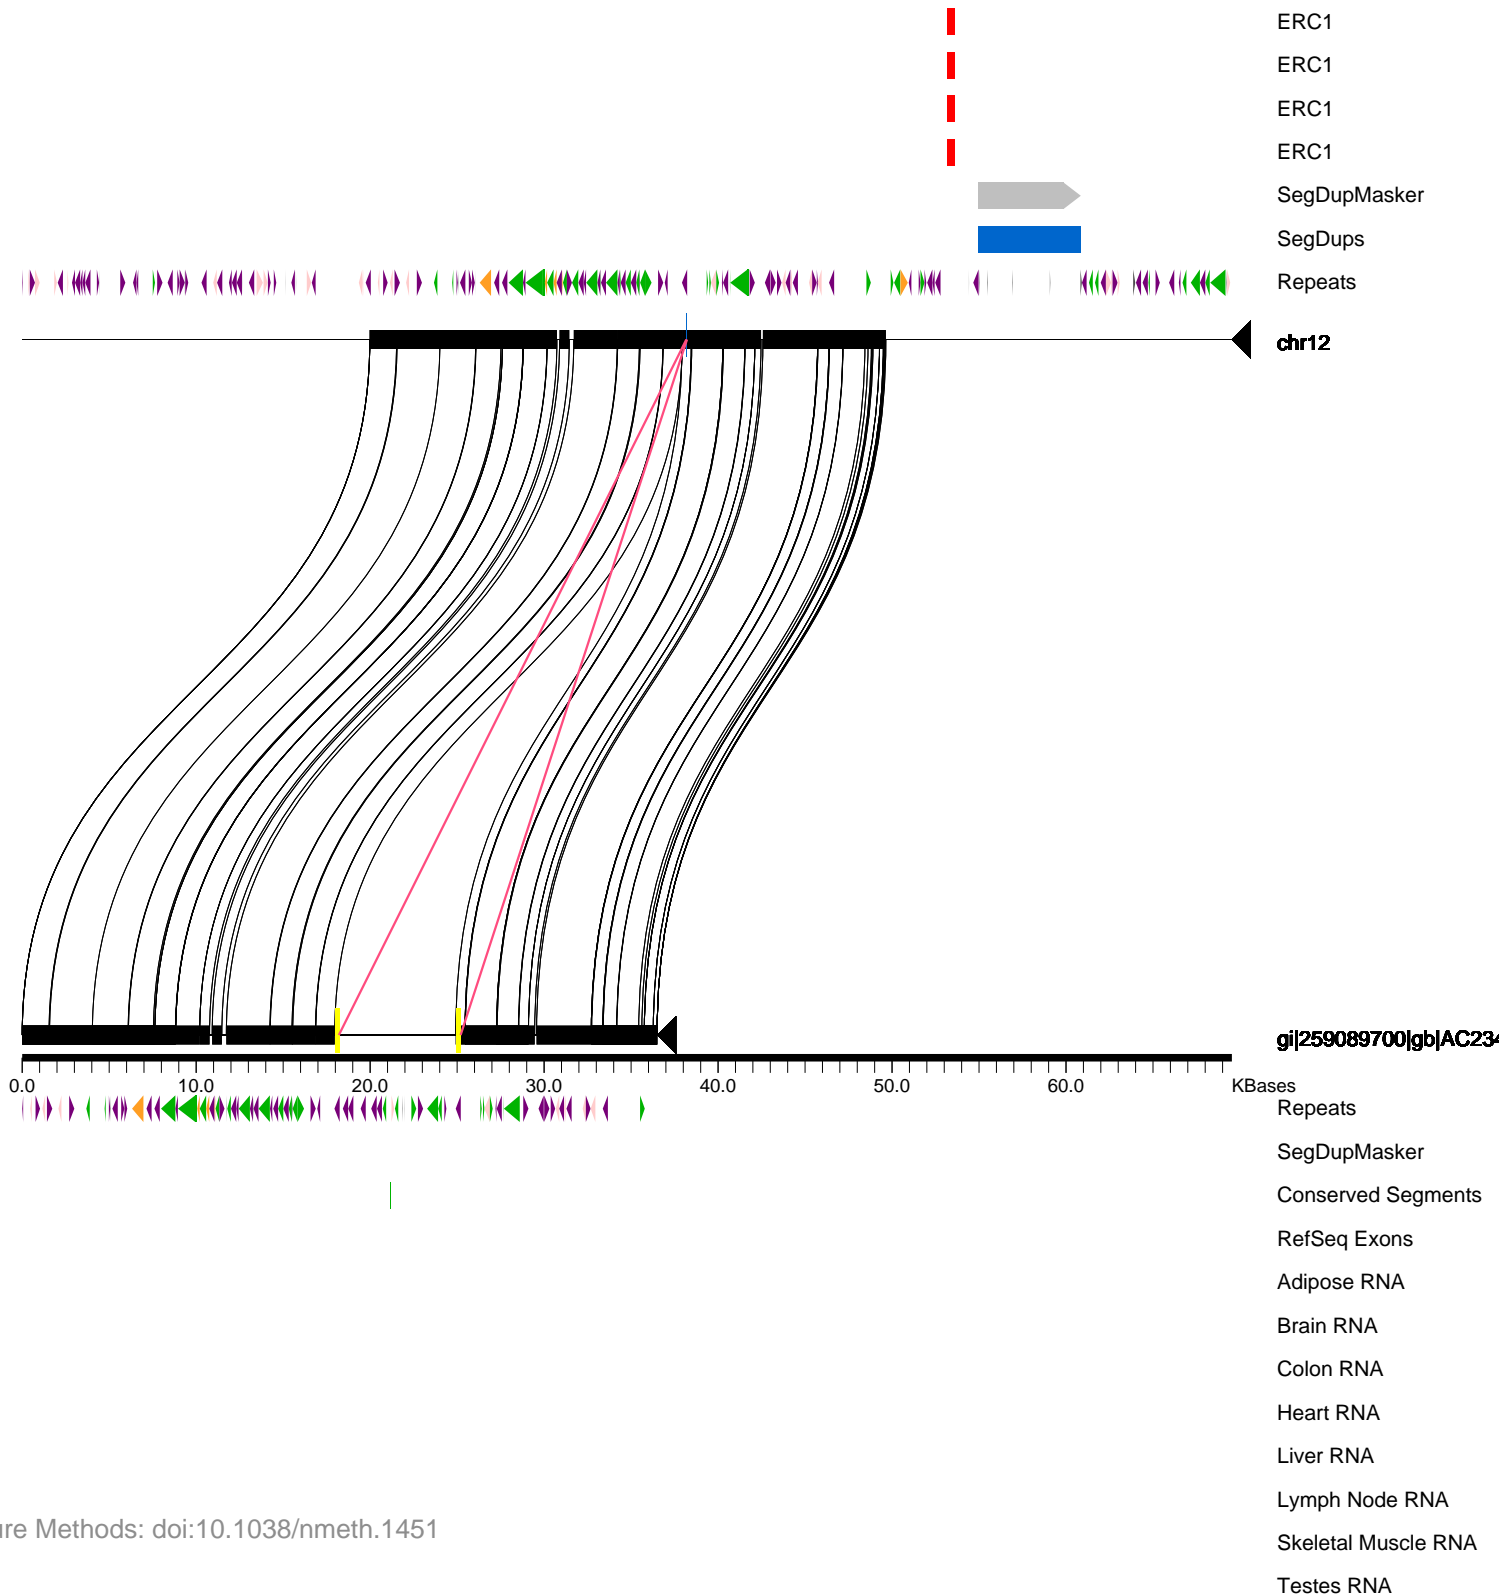



Clone file = AC235087.fa

Insertion Size: 2026

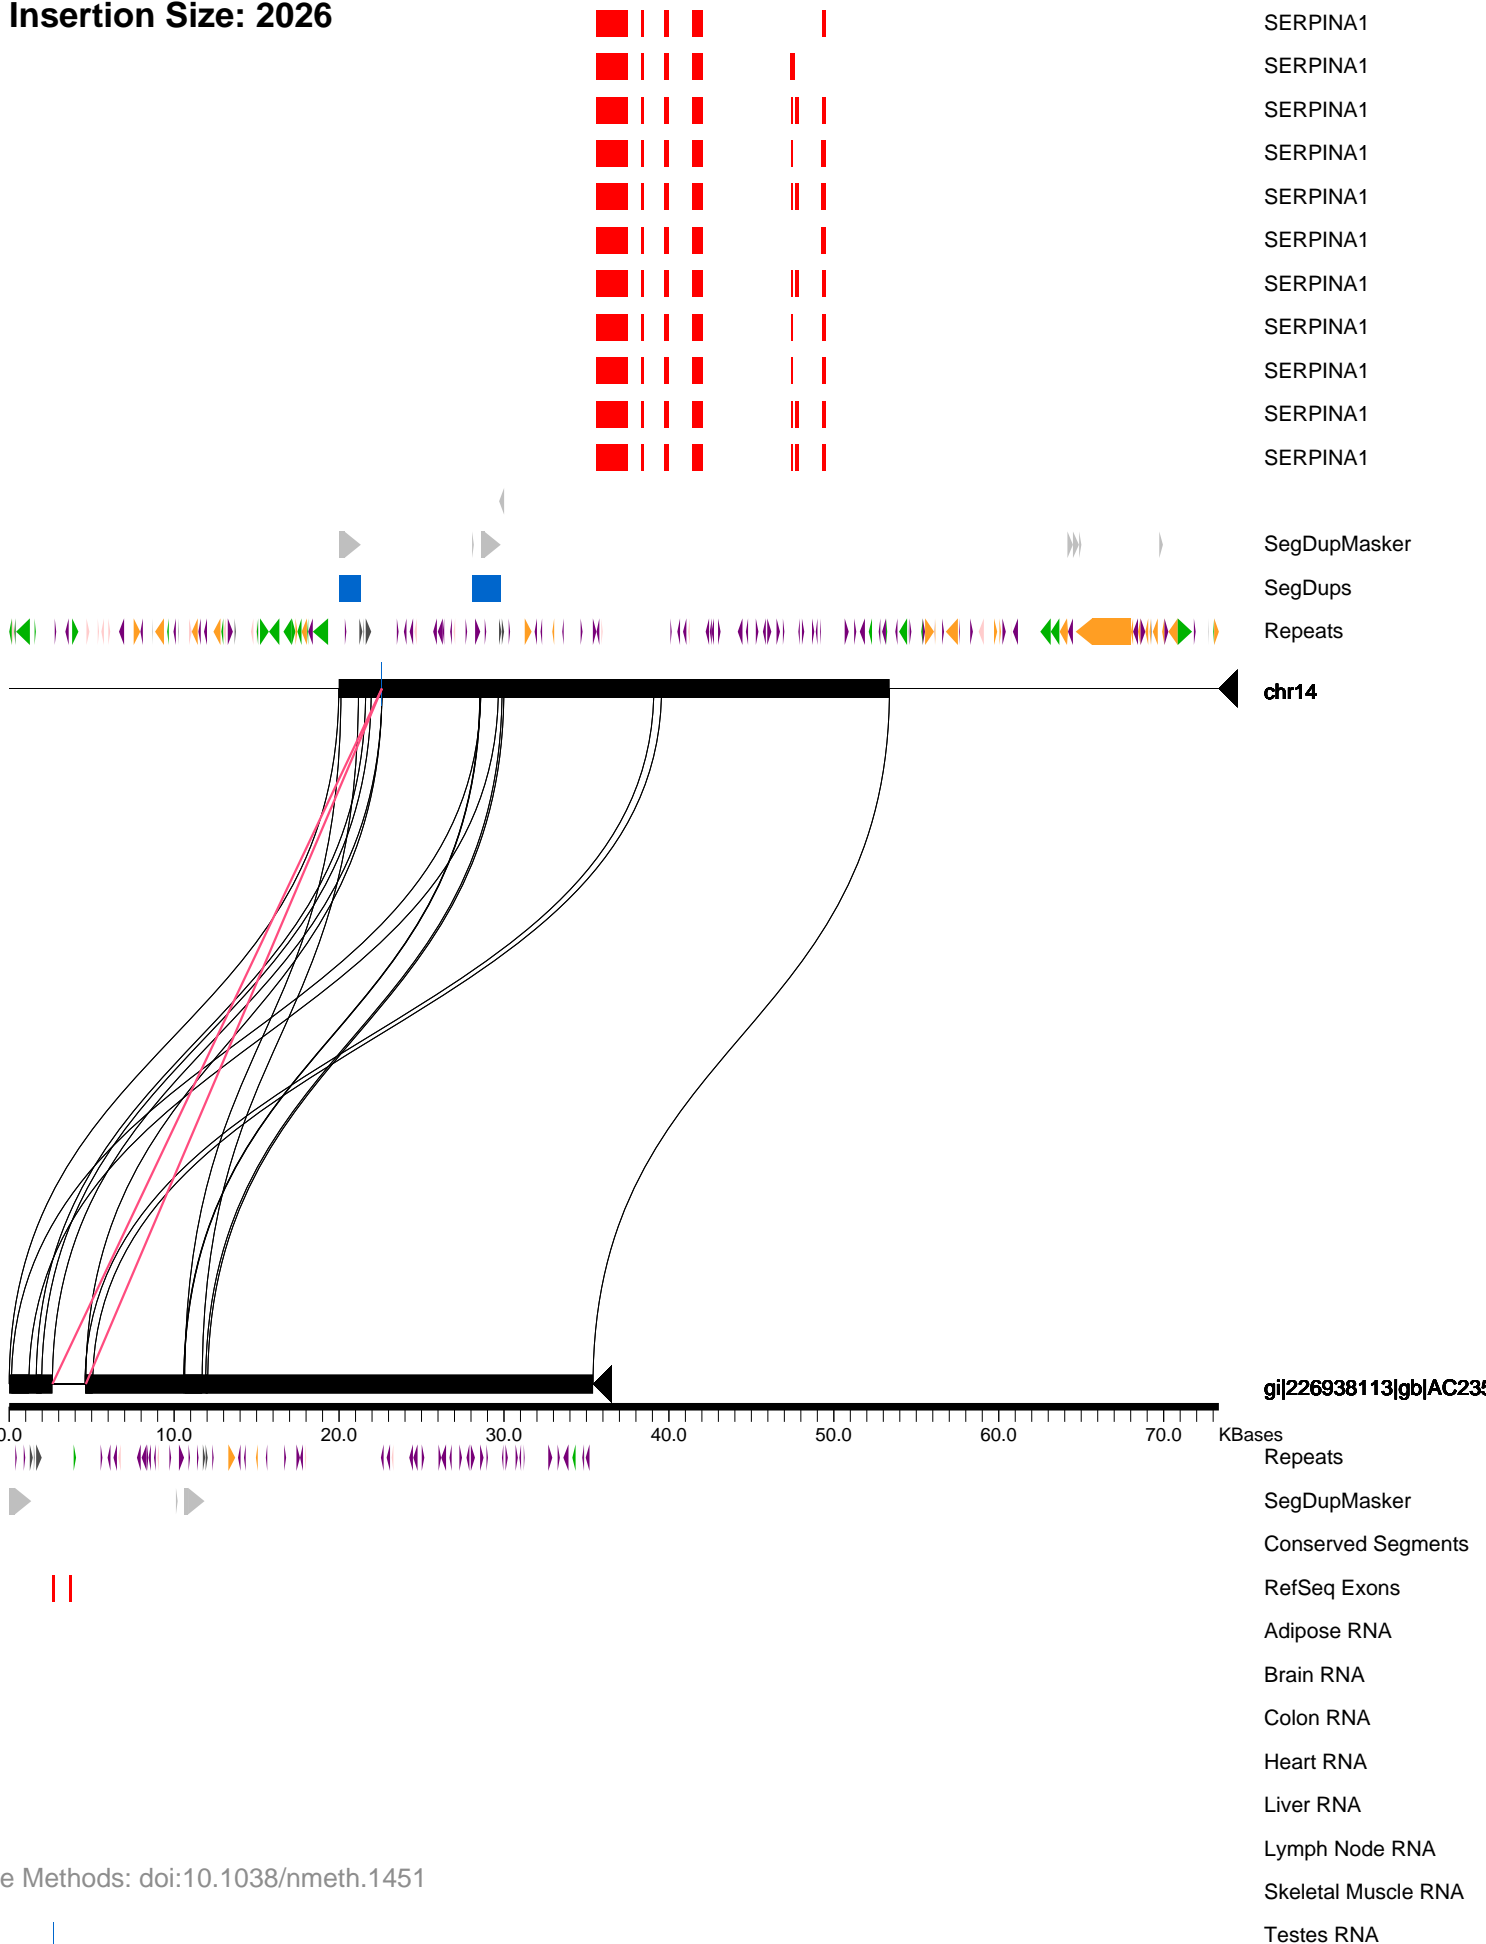

Clone file = AC235759.rc.fa

Insertion Size: 2113

Other Simple Repeat Low Complexity DNA LTR LINE SINE

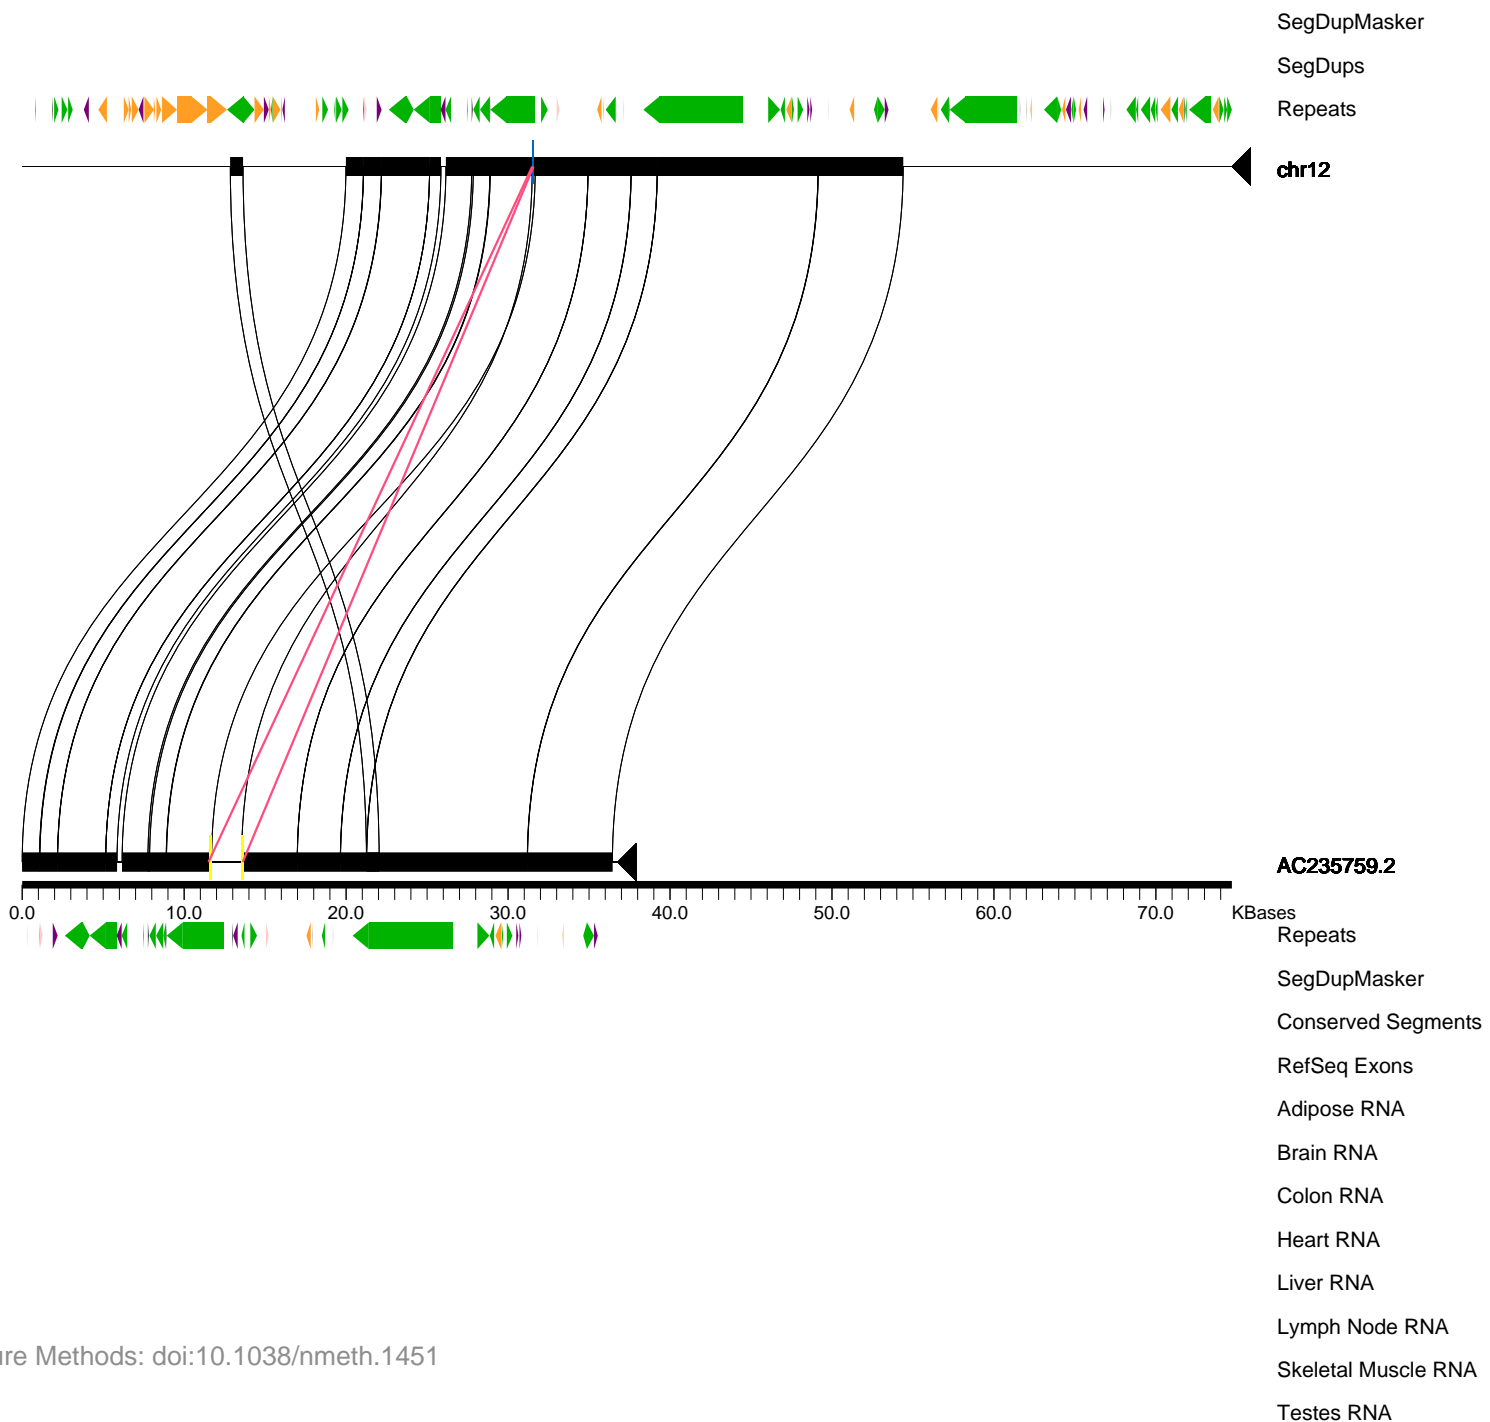

Clone file = AC236073.rc.fa

Insertion Size: 27613

Other Simple Repeat Low Complexity DNA LTR LINE SINE

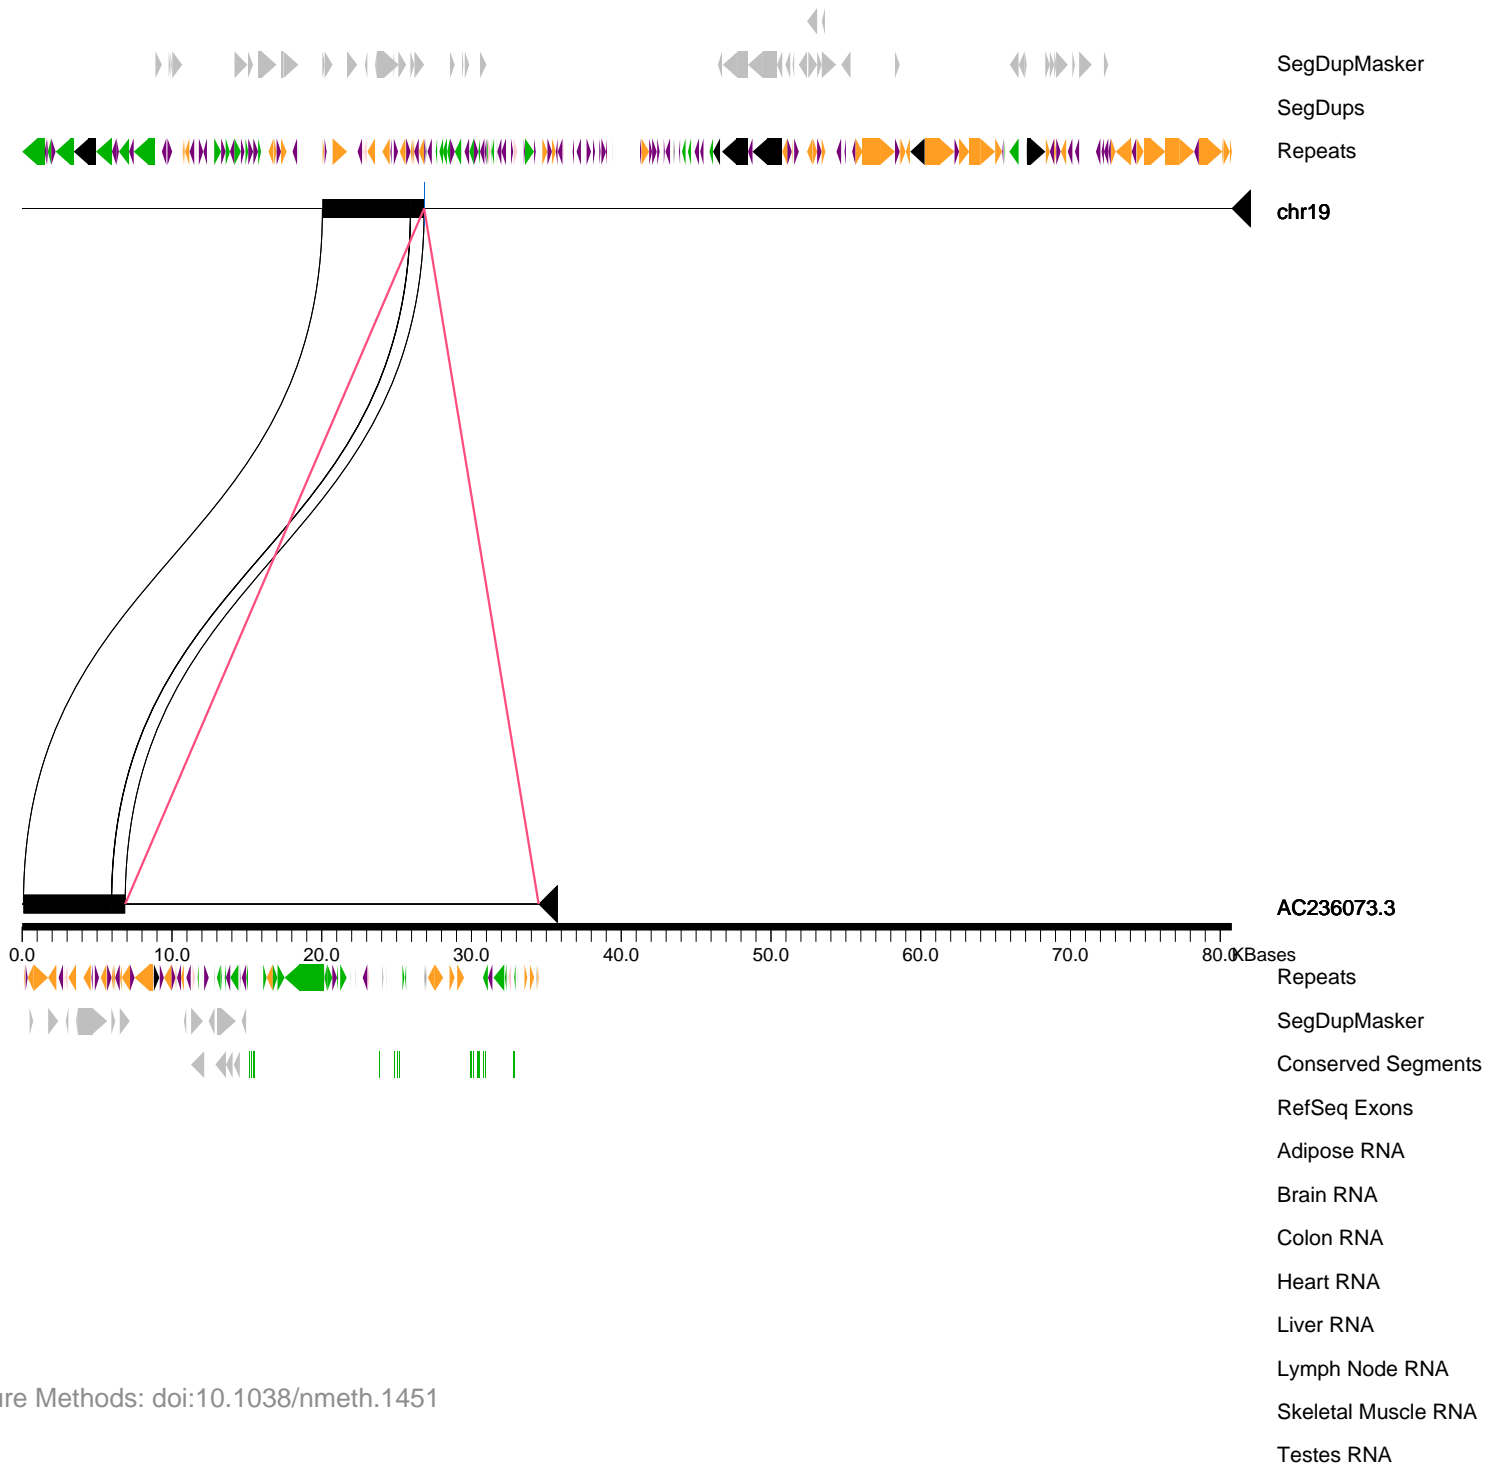

Clone file = AC236778.rc.fa

Insertion Size: 3305

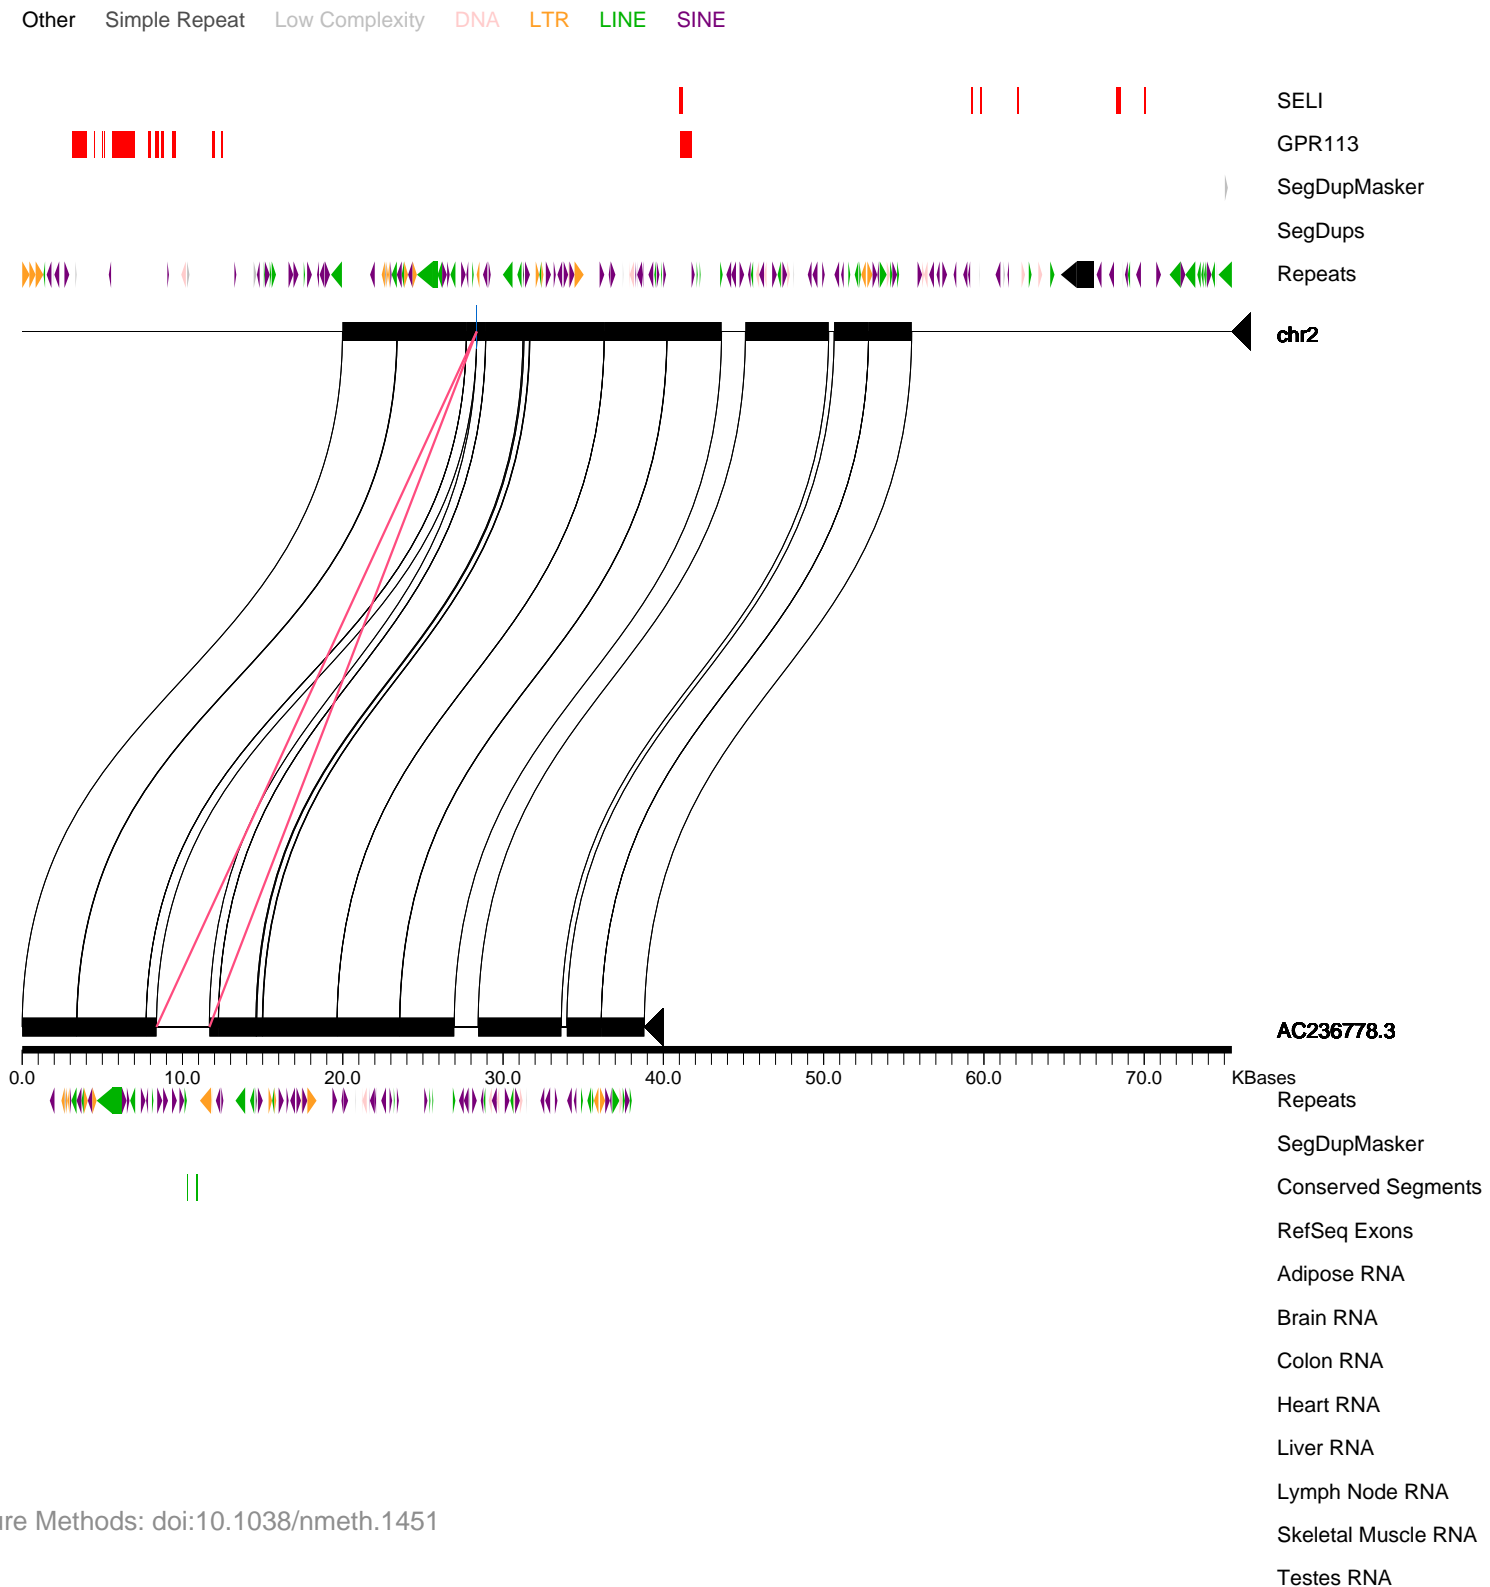

Clone file = AC236926.rc.fa

Insertion Size: 3008

Other Simple Repeat Low Complexity DNA LTR LINE SINE

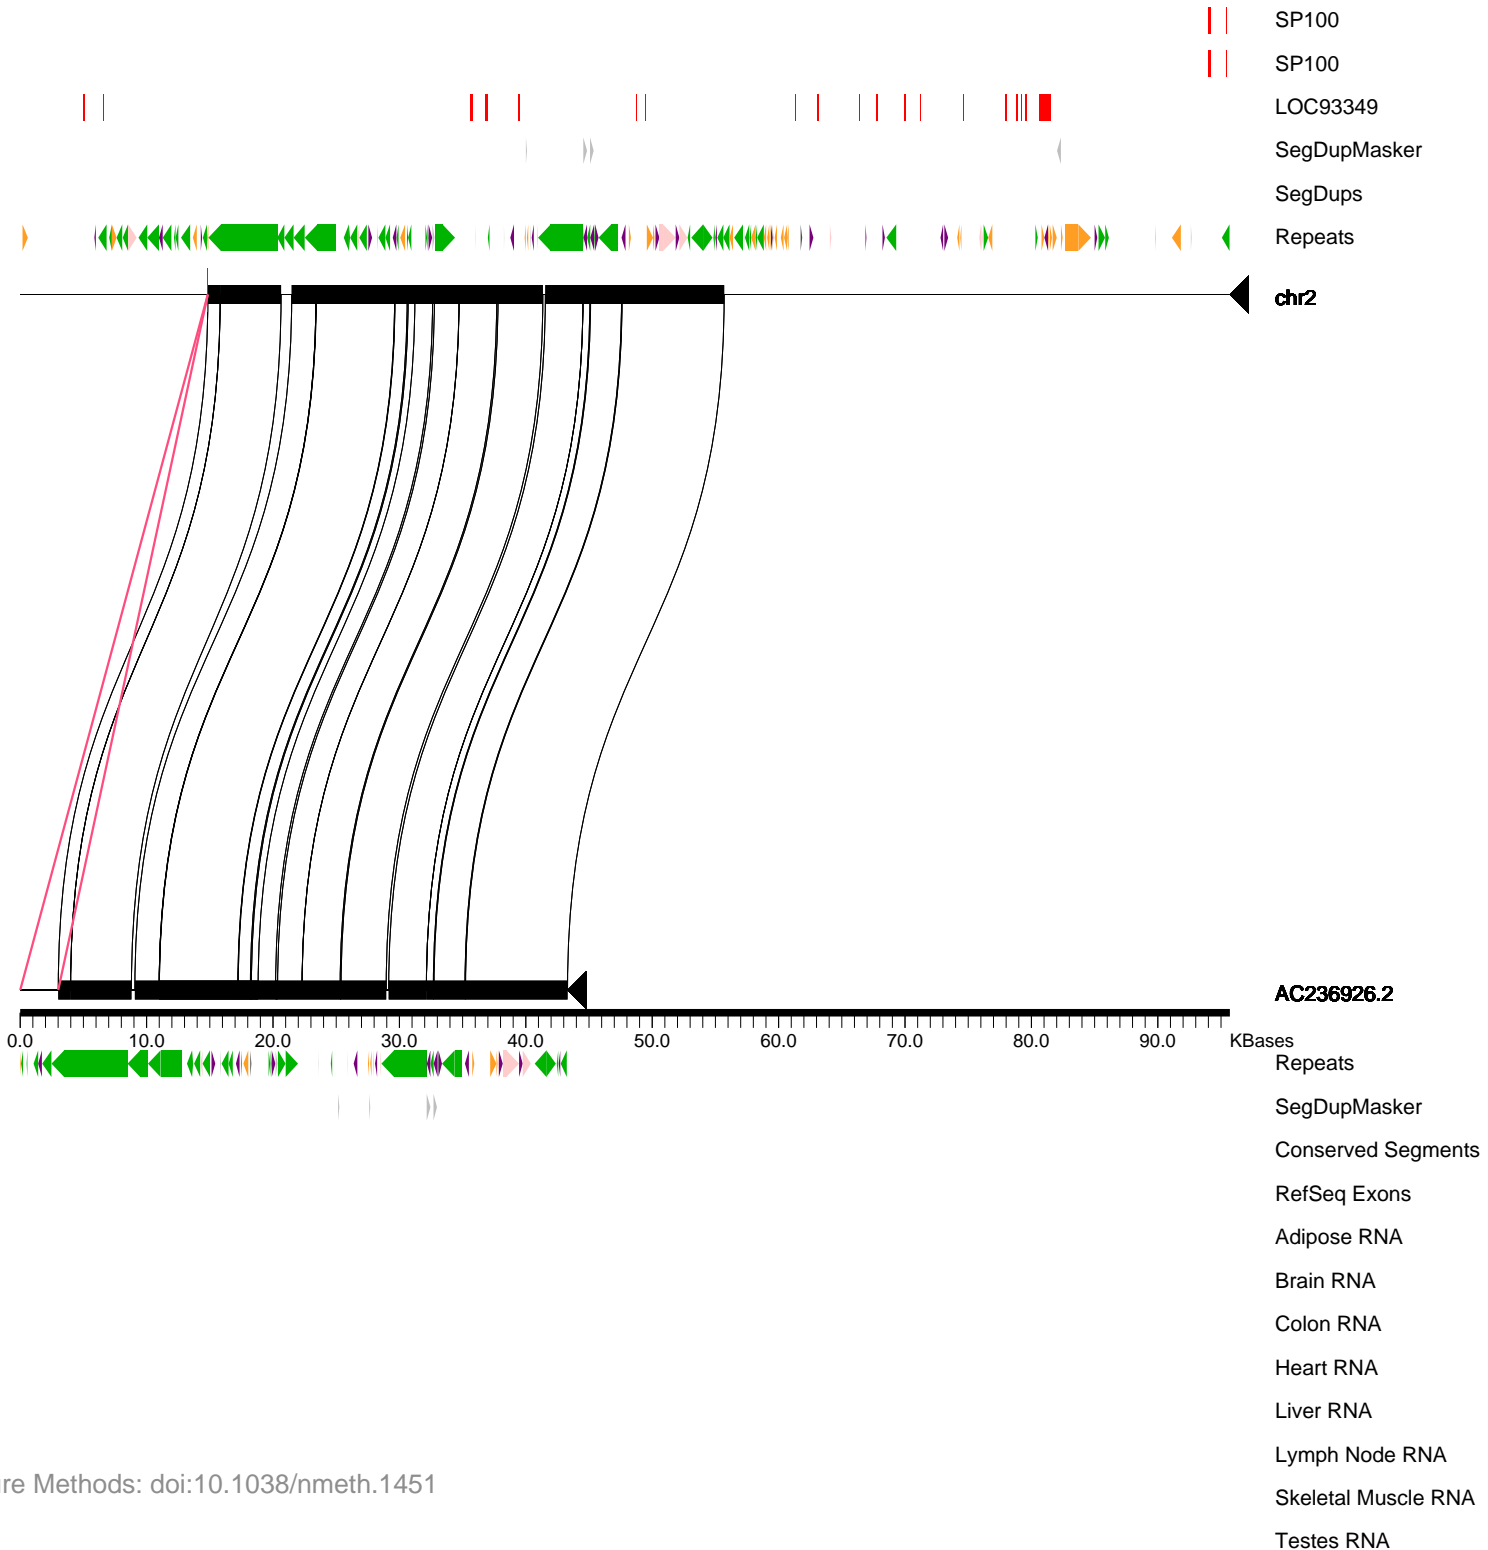

Clone file = AC236964.fa

Insertion Size: 8998

Other Simple Repeat Low Complexity DNA LTR LINE SINE

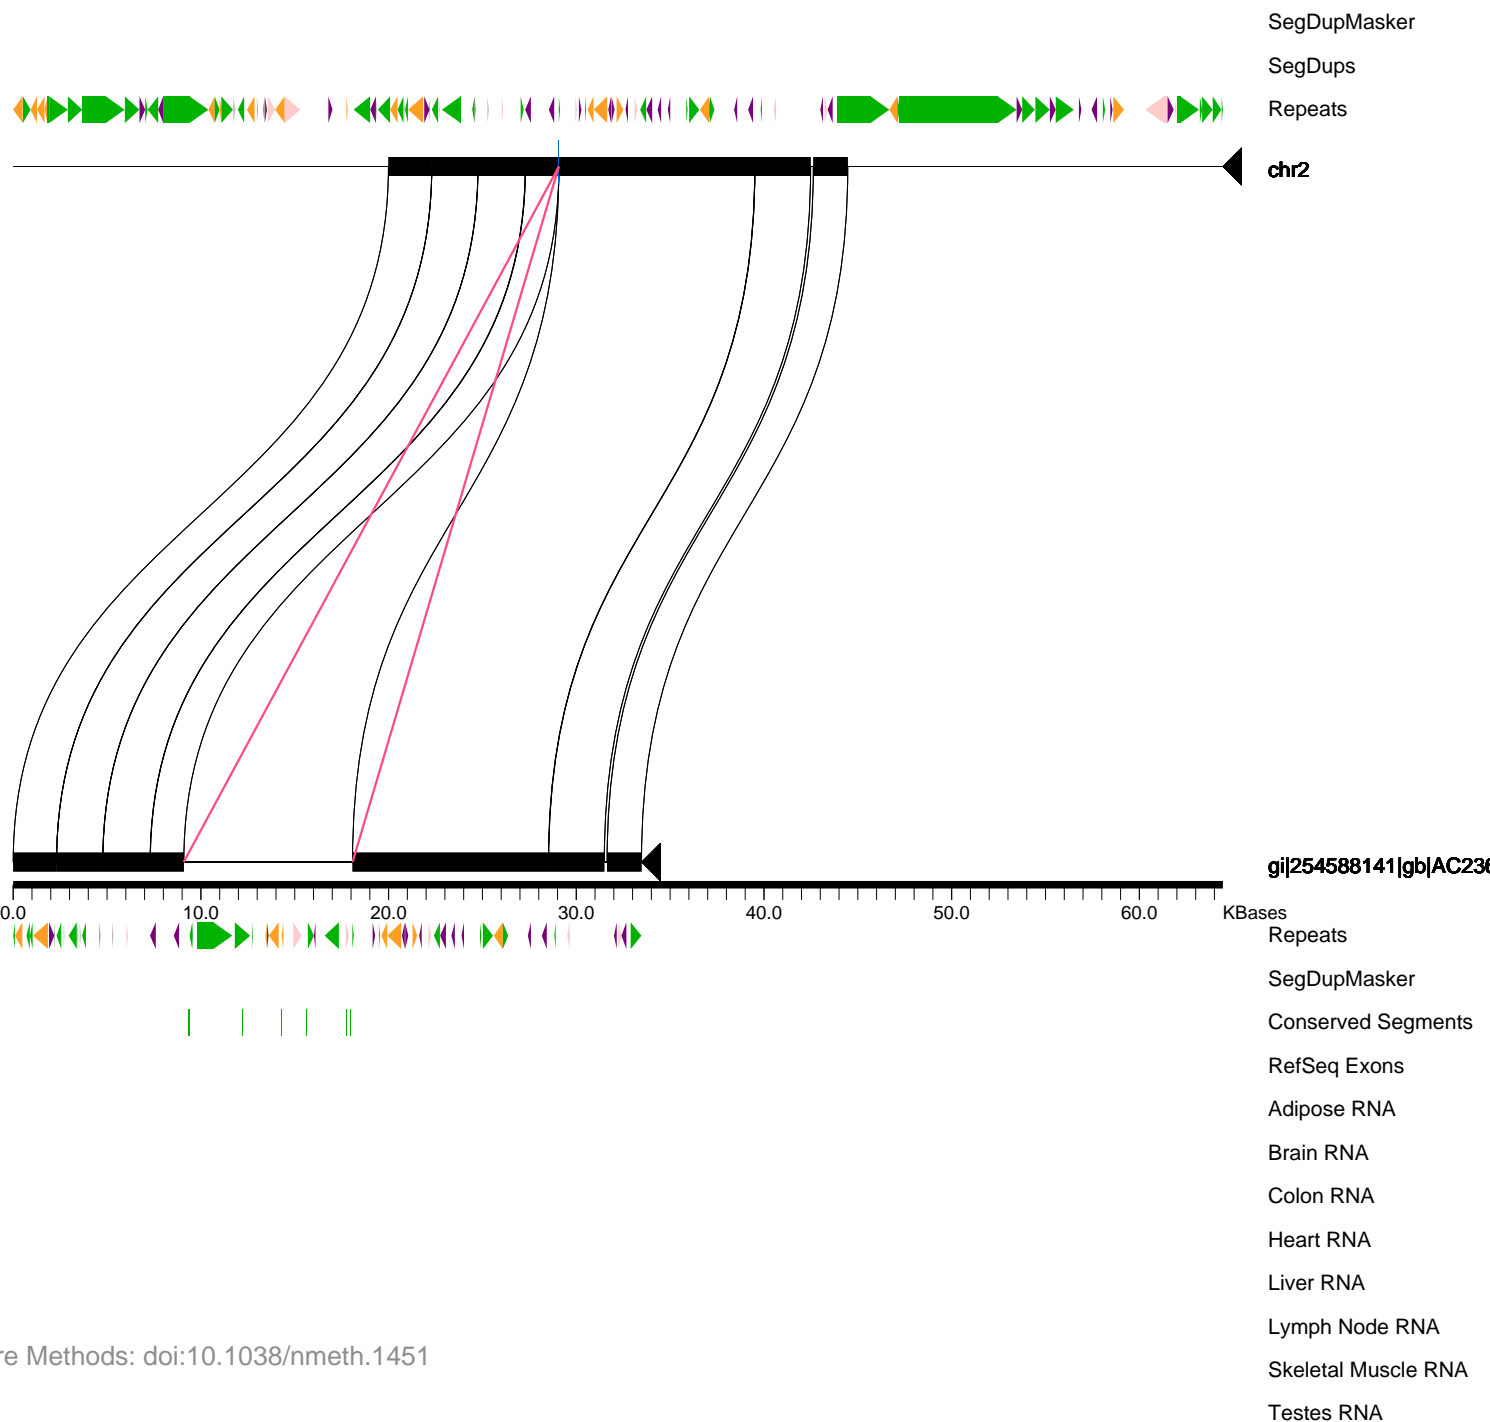

Clone file = AC237106.fa

Insertion Size: 2160

Other Simple Repeat Low Complexity DNA LTR LINE SINE

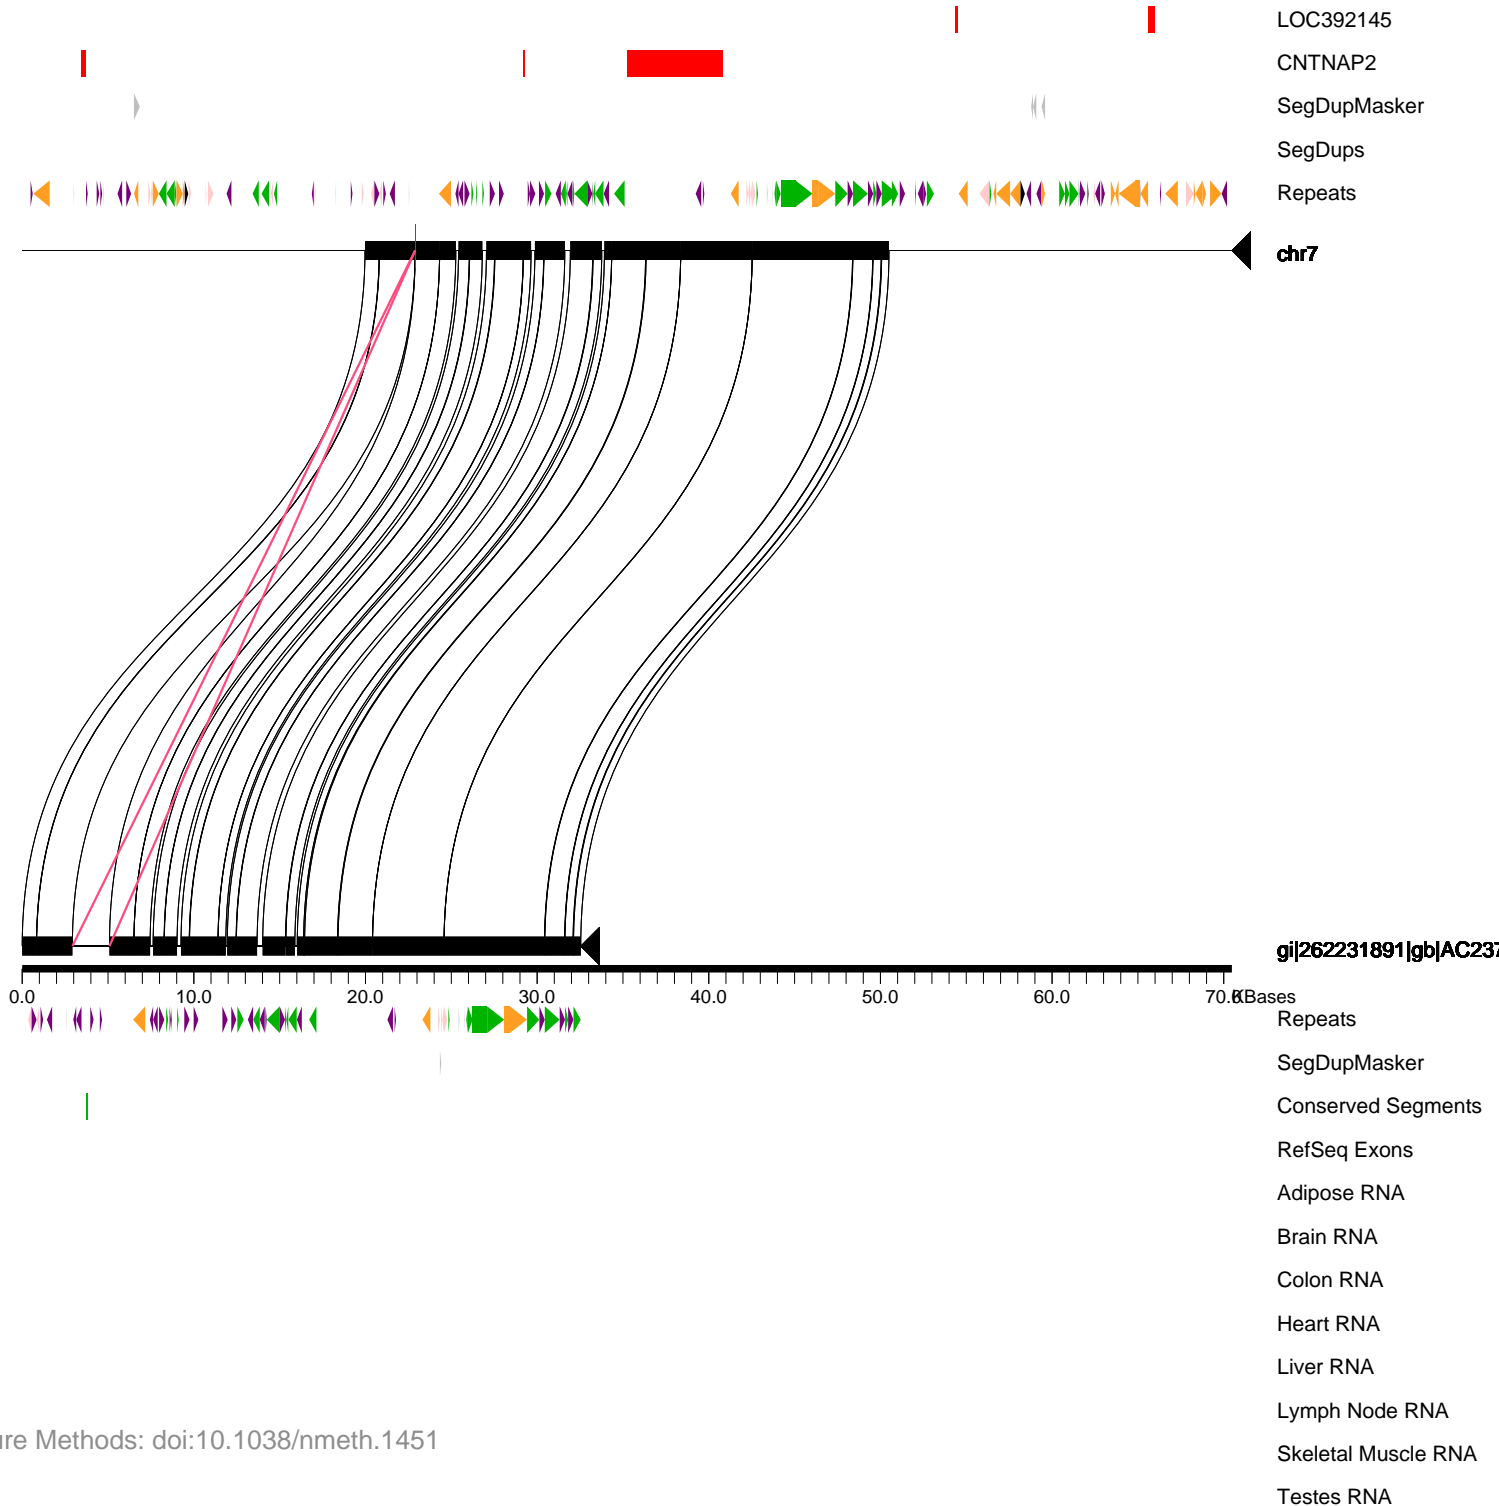

Clone file = AC237148.rc.fa

Insertion Size: 2155

Other Simple Repeat Low Complexity DNA LTR LINE SINE

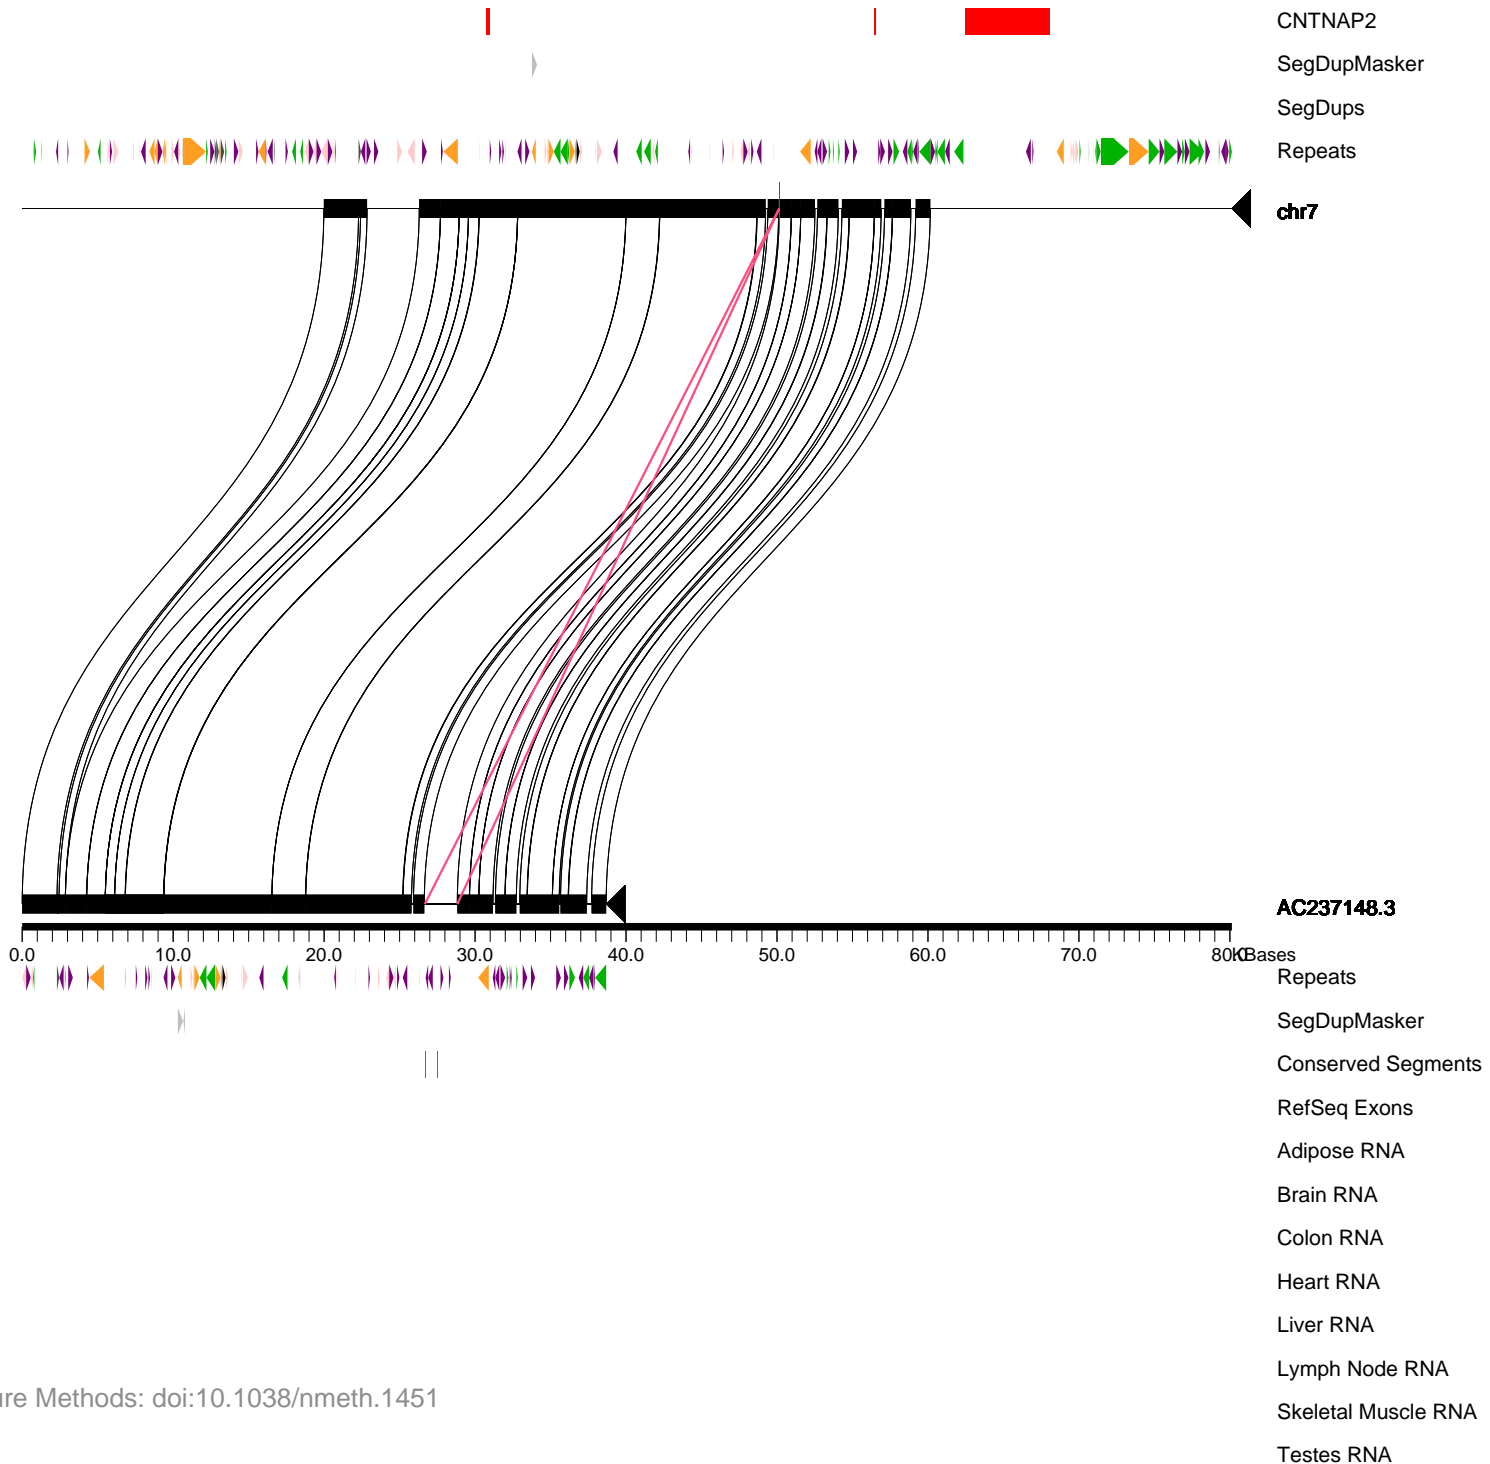



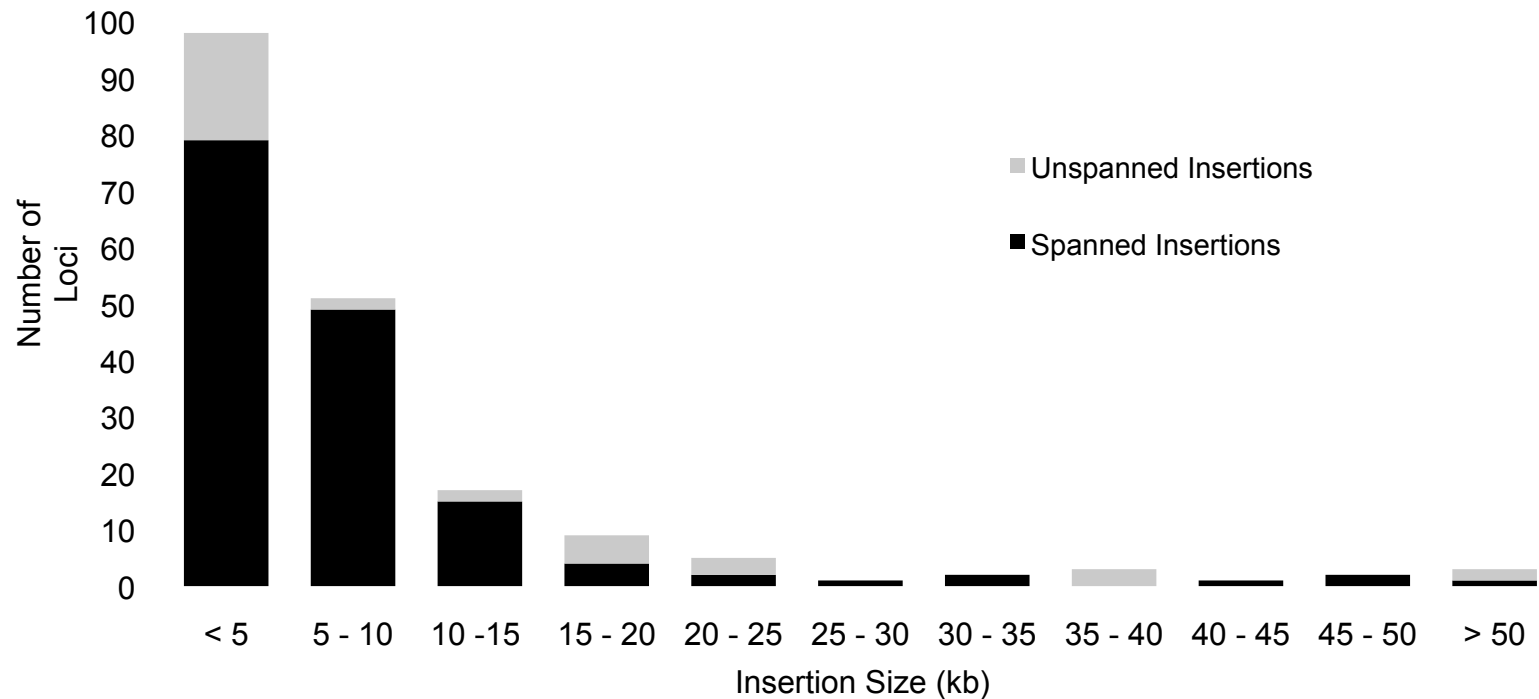

**Supplementary Figure 6** Size distribution for sequenced insertions

Insertion sizes were determined by complete sequencing of 192 novel insertions corresponding to 1.67 Mb of sequence. The filled black bars correspond to 156 completely spanned insertions for which the entire insertion sequence could be determined (including 4 sites >40 kb spanned using multiple OEA clones). The grey segment represents the amount of sequence captured by OEA clones at 36 loci that have not been traversed. These sequences therefore represent a minimum estimate of the true insertion size.

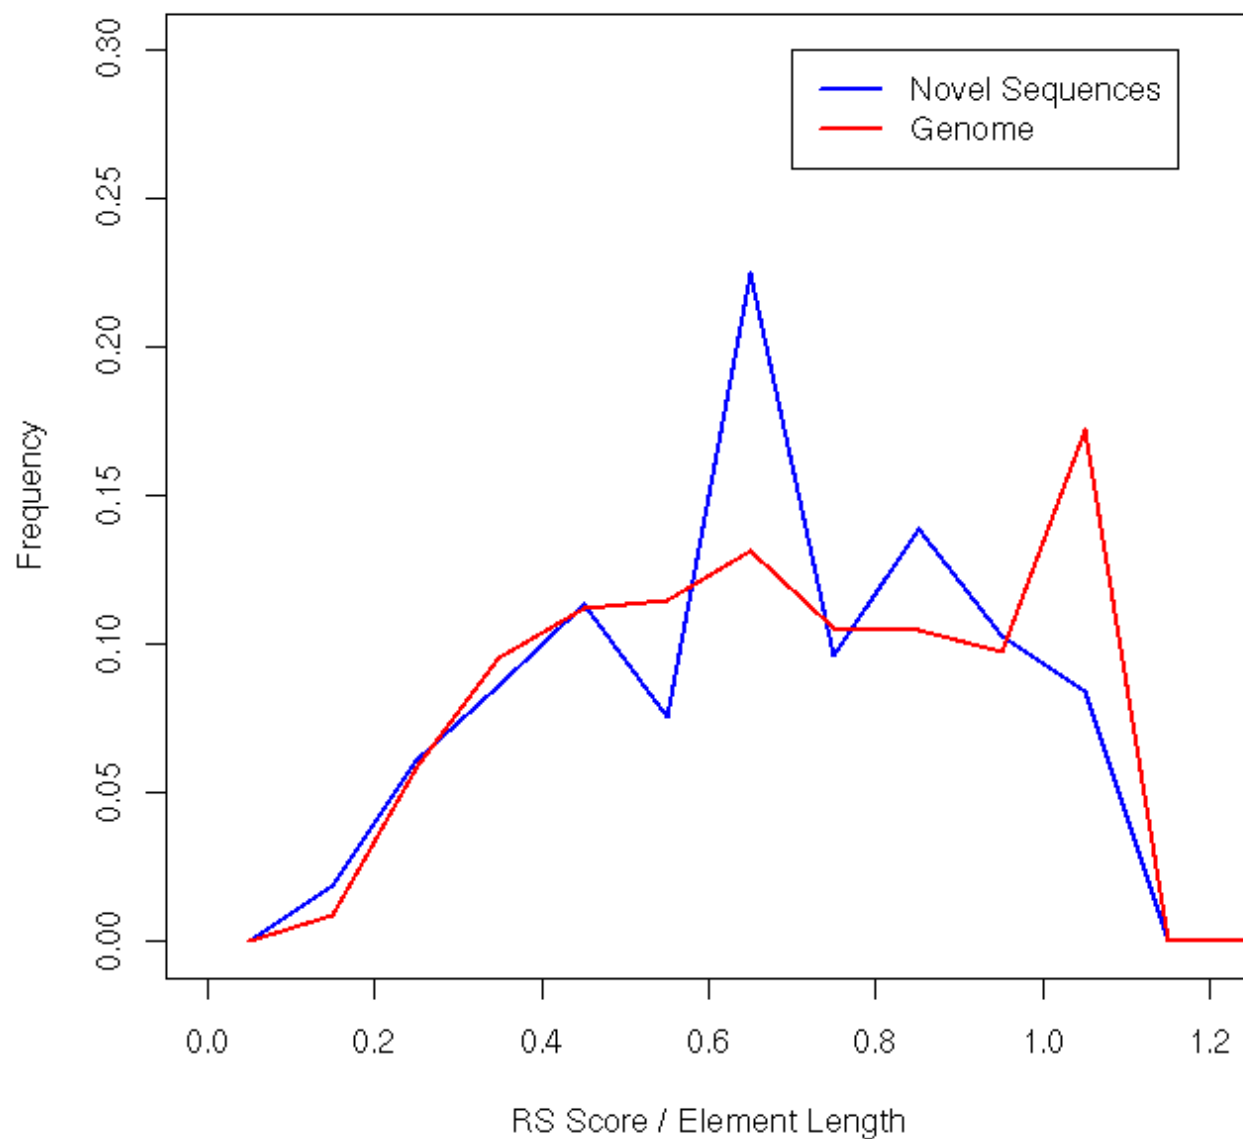

**Supplementary Figure 7** Distribution of constraint for conserved elements

The distribution of total RS score divided by element length is shown for 477 conserved elements identified in the insertion sequences and for 1,133,900 constrained elements identified in the Ensembl Compara 51 9-species alignments. In both data-sets the human sequence was omitted prior to calculating levels of constraint.

**Supplementary Table 2** Map locations of anchored loci

The 400 novel sequence loci having a defined genome anchor are shown. Contigs were required to have consistent anchors located within 100 kb of each other. Coordinates are given for the NCBI build35 genome assembly.

| <b>locus name</b> | <b>chrn</b> | <b>begin</b> | <b>end</b> |
|-------------------|-------------|--------------|------------|
| novel-locus_1     | chr2        | 1481419      | 1628043    |
| novel-locus_2     | chr4        | 167892757    | 167996626  |
| novel-locus_7     | chr12       | 131442013    | 131461790  |
| novel-locus_10    | chr20       | 60490150     | 60603931   |
| novel-locus_14    | chr6        | 95705659     | 95737264   |
| novel-locus_15    | chr6        | 119218754    | 119296390  |
| novel-locus_16    | chr11       | 69396933     | 69495348   |
| novel-locus_18    | chr20       | 53517037     | 53593400   |
| novel-locus_19    | chr12       | 132350817    | 132383947  |
| novel-locus_21    | chr3        | 66375963     | 66459324   |
| novel-locus_22    | chr6        | 69020036     | 69021785   |
| novel-locus_23    | chr11       | 70439901     | 70518289   |
| novel-locus_24    | chrX        | 76390972     | 76408442   |
| novel-locus_25    | chr13       | 111577720    | 111592136  |
| novel-locus_26    | chr8        | 21623864     | 21630103   |
| novel-locus_31    | chr2        | 89435851     | 89468868   |
| novel-locus_43    | chr13       | 113620894    | 113648269  |
| novel-locus_45    | chr7        | 98423577     | 98501730   |
| novel-locus_47    | chr22       | 47339640     | 47347031   |
| novel-locus_48    | chr8        | 58105700     | 58187102   |
| novel-locus_50    | chr9        | 134297576    | 134305963  |
| novel-locus_51    | chr9        | 130113403    | 130150824  |
| novel-locus_53    | chr2        | 149476515    | 149486750  |
| novel-locus_54    | chr3        | 32653619     | 32728200   |
| novel-locus_55    | chr12       | 107796063    | 107931938  |
| novel-locus_57    | chr3        | 195477493    | 195576652  |
| novel-locus_59    | chr6        | 80099674     | 80181401   |
| novel-locus_65    | chr17       | 260347       | 263109     |
| novel-locus_78    | chr8        | 21371450     | 21452967   |
| novel-locus_83    | chr7        | 47942254     | 48053088   |
| novel-locus_88    | chr1        | 204774710    | 204775525  |
| novel-locus_92    | chr5        | 94538753     | 94614515   |
| novel-locus_93    | chr18       | 13938431     | 14011851   |
| novel-locus_96    | chr12       | 126124874    | 126192633  |
| novel-locus_98    | chr2        | 16289006     | 16319752   |
| novel-locus_100   | chrX        | 147018894    | 147019681  |
| novel-locus_102   | chr20       | 4336438      | 4416508    |
| novel-locus_103   | chr8        | 142453189    | 142533856  |
| novel-locus_107   | chr1        | 3935662      | 3945471    |
| novel-locus_109   | chr2        | 4459296      | 4479518    |

|                 |       |           |           |
|-----------------|-------|-----------|-----------|
| novel-locus_111 | chr7  | 129707195 | 129786385 |
| novel-locus_112 | chr11 | 56189696  | 56263803  |
| novel-locus_115 | chr17 | 47995161  | 48070195  |
| novel-locus_116 | chr19 | 21566038  | 21574238  |
| novel-locus_118 | chr1  | 231435637 | 231472816 |
| novel-locus_119 | chr13 | 25245195  | 25325741  |
| novel-locus_122 | chr10 | 103638825 | 103647016 |
| novel-locus_123 | chr1  | 220040658 | 220170044 |
| novel-locus_126 | chr4  | 31449331  | 31457033  |
| novel-locus_129 | chr9  | 88005411  | 88083297  |
| novel-locus_130 | chr6  | 13194747  | 13276790  |
| novel-locus_132 | chr15 | 75746052  | 75811857  |
| novel-locus_133 | chr3  | 146433392 | 146512713 |
| novel-locus_136 | chr10 | 82925050  | 82999452  |
| novel-locus_138 | chr5  | 97632155  | 97650512  |
| novel-locus_139 | chr21 | 14696133  | 14766367  |
| novel-locus_140 | chr19 | 39466456  | 39616620  |
| novel-locus_141 | chr9  | 101420958 | 101424685 |
| novel-locus_142 | chr5  | 29067224  | 29072091  |
| novel-locus_143 | chr17 | 68331759  | 68429248  |
| novel-locus_145 | chr1  | 202614909 | 202636666 |
| novel-locus_147 | chr1  | 207175638 | 207258541 |
| novel-locus_148 | chr4  | 121454593 | 121536385 |
| novel-locus_150 | chr2  | 117393057 | 117400457 |
| novel-locus_151 | chr13 | 113484022 | 113513392 |
| novel-locus_152 | chr10 | 37865567  | 37866229  |
| novel-locus_153 | chr17 | 18818166  | 18822889  |
| novel-locus_154 | chr12 | 121139614 | 121154611 |
| novel-locus_156 | chr6  | 104783168 | 104858561 |
| novel-locus_157 | chr18 | 66245599  | 66318778  |
| novel-locus_158 | chr2  | 114386235 | 114462833 |
| novel-locus_160 | chrX  | 36818399  | 36824805  |
| novel-locus_167 | chr3  | 84994700  | 85070040  |
| novel-locus_168 | chr14 | 100452761 | 100530750 |
| novel-locus_170 | chr7  | 286375    | 293725    |
| novel-locus_173 | chr2  | 233790004 | 233891008 |
| novel-locus_174 | chr7  | 97995601  | 98065163  |
| novel-locus_175 | chr21 | 29373076  | 29452594  |
| novel-locus_178 | chrX  | 151884818 | 152093528 |
| novel-locus_181 | chr4  | 157196240 | 157272185 |
| novel-locus_182 | chr20 | 31669     | 48843     |
| novel-locus_184 | chr2  | 1214417   | 1220376   |
| novel-locus_186 | chr1  | 103457801 | 103495814 |
| novel-locus_188 | chr1  | 31602684  | 31677453  |
| novel-locus_189 | chr3  | 47406235  | 47491479  |
| novel-locus_190 | chr22 | 42993199  | 43095758  |
| novel-locus_192 | chr4  | 190292101 | 190373677 |
| novel-locus_193 | chr13 | 85621905  | 85637284  |
| novel-locus_194 | chr14 | 63299763  | 63375958  |

|                 |       |           |           |
|-----------------|-------|-----------|-----------|
| novel-locus_195 | chr1  | 5294323   | 5439512   |
| novel-locus_198 | chr2  | 208747685 | 208828456 |
| novel-locus_199 | chr14 | 93861171  | 93943187  |
| novel-locus_200 | chr20 | 46211899  | 46212576  |
| novel-locus_201 | chr15 | 64142118  | 64220468  |
| novel-locus_203 | chr15 | 25137673  | 25146319  |
| novel-locus_204 | chr8  | 49209535  | 49288171  |
| novel-locus_205 | chr11 | 42740780  | 42742233  |
| novel-locus_206 | chr3  | 57321452  | 57396643  |
| novel-locus_207 | chr21 | 21355906  | 21428601  |
| novel-locus_209 | chr4  | 1382182   | 1498091   |
| novel-locus_210 | chr19 | 1077800   | 1155279   |
| novel-locus_213 | chr1  | 3806192   | 3829997   |
| novel-locus_214 | chrX  | 148648267 | 148663207 |
| novel-locus_215 | chr7  | 50104635  | 50221793  |
| novel-locus_216 | chr12 | 120925161 | 120959528 |
| novel-locus_218 | chr11 | 59535950  | 59609789  |
| novel-locus_225 | chr18 | 3058670   | 3064899   |
| novel-locus_227 | chr4  | 32702762  | 32712352  |
| novel-locus_228 | chr7  | 67635135  | 67711458  |
| novel-locus_229 | chr6  | 32426346  | 32497046  |
| novel-locus_234 | chr18 | 70494293  | 70500353  |
| novel-locus_235 | chr10 | 128571311 | 128698498 |
| novel-locus_236 | chr9  | 130935212 | 130936037 |
| novel-locus_237 | chr2  | 21032948  | 21135012  |
| novel-locus_241 | chr6  | 169965084 | 170097542 |
| novel-locus_242 | chr11 | 8011976   | 8101216   |
| novel-locus_247 | chr11 | 89594565  | 89669563  |
| novel-locus_248 | chr11 | 55497249  | 55497929  |
| novel-locus_255 | chr2  | 237539180 | 237617954 |
| novel-locus_257 | chr22 | 44645603  | 44750046  |
| novel-locus_259 | chr1  | 245177563 | 245304384 |
| novel-locus_260 | chr7  | 154652949 | 154662015 |
| novel-locus_261 | chr6  | 82985969  | 83065812  |
| novel-locus_262 | chr12 | 37495639  | 37570779  |
| novel-locus_263 | chr17 | 76902168  | 77154294  |
| novel-locus_264 | chr11 | 91668716  | 91742501  |
| novel-locus_265 | chr18 | 68751197  | 68823968  |
| novel-locus_266 | chr15 | 18783377  | 18839127  |
| novel-locus_267 | chr19 | 8831130   | 8901539   |
| novel-locus_268 | chr22 | 17769882  | 17770654  |
| novel-locus_274 | chr11 | 1116549   | 1128154   |
| novel-locus_277 | chrX  | 4785906   | 4866299   |
| novel-locus_279 | chr15 | 27602915  | 27681706  |
| novel-locus_280 | chr20 | 11269943  | 11283252  |
| novel-locus_282 | chr5  | 26875049  | 26951181  |
| novel-locus_284 | chr15 | 96394881  | 96406914  |
| novel-locus_285 | chr2  | 169514440 | 169588018 |
| novel-locus_288 | chr6  | 80628948  | 80708997  |

|                 |       |           |           |
|-----------------|-------|-----------|-----------|
| novel-locus_290 | chr2  | 129601211 | 129684038 |
| novel-locus_292 | chr5  | 124757014 | 124828339 |
| novel-locus_293 | chr12 | 85117092  | 85191426  |
| novel-locus_294 | chr5  | 157176629 | 157177532 |
| novel-locus_296 | chr16 | 30001584  | 30078443  |
| novel-locus_297 | chr8  | 130787977 | 130865169 |
| novel-locus_299 | chr4  | 97739760  | 97821211  |
| novel-locus_301 | chr2  | 126754568 | 126825276 |
| novel-locus_302 | chr5  | 12701053  | 12771819  |
| novel-locus_303 | chr18 | 44413428  | 44493375  |
| novel-locus_305 | chr18 | 63234122  | 63311901  |
| novel-locus_307 | chr3  | 185596339 | 185671910 |
| novel-locus_312 | chr10 | 88215267  | 88295610  |
| novel-locus_316 | chr10 | 76287791  | 76288387  |
| novel-locus_319 | chr12 | 107438437 | 107516755 |
| novel-locus_321 | chr12 | 6157100   | 6322814   |
| novel-locus_322 | chr1  | 61525878  | 61613498  |
| novel-locus_323 | chr6  | 165125903 | 165206642 |
| novel-locus_324 | chr10 | 27613358  | 27678648  |
| novel-locus_330 | chr20 | 56384826  | 56465692  |
| novel-locus_331 | chr8  | 144976824 | 145203821 |
| novel-locus_334 | chr7  | 138794105 | 138903690 |
| novel-locus_335 | chr1  | 195173079 | 195240427 |
| novel-locus_336 | chr16 | 2811479   | 2894586   |
| novel-locus_340 | chr12 | 74743546  | 74762735  |
| novel-locus_341 | chr19 | 16066314  | 16068963  |
| novel-locus_345 | chr3  | 173930601 | 173931380 |
| novel-locus_347 | chrX  | 153144348 | 153148144 |
| novel-locus_348 | chr16 | 74580032  | 74654377  |
| novel-locus_351 | chr6  | 66578098  | 66657455  |
| novel-locus_352 | chr3  | 37764227  | 37765373  |
| novel-locus_353 | chr16 | 24749347  | 24754513  |
| novel-locus_354 | chr12 | 57606424  | 57684731  |
| novel-locus_357 | chr22 | 21041188  | 21234037  |
| novel-locus_358 | chr8  | 11679871  | 11680547  |
| novel-locus_360 | chr19 | 52577941  | 52653812  |
| novel-locus_361 | chr15 | 81659620  | 81665855  |
| novel-locus_363 | chr18 | 18345758  | 18425174  |
| novel-locus_367 | chrX  | 46984237  | 46985100  |
| novel-locus_369 | chr10 | 57970607  | 58038405  |
| novel-locus_370 | chr14 | 68367956  | 68442260  |
| novel-locus_371 | chr14 | 66894193  | 66971670  |
| novel-locus_372 | chr1  | 169953072 | 169953840 |
| novel-locus_373 | chr10 | 133230019 | 133314858 |
| novel-locus_376 | chr19 | 23907633  | 24097614  |
| novel-locus_378 | chr3  | 66074582  | 66105441  |
| novel-locus_382 | chr1  | 118610995 | 118677369 |
| novel-locus_391 | chr9  | 136517708 | 136532700 |
| novel-locus_392 | chr13 | 108100745 | 108177118 |

|                 |       |           |           |
|-----------------|-------|-----------|-----------|
| novel-locus_393 | chr9  | 134409143 | 134425396 |
| novel-locus_396 | chr5  | 9984065   | 10063672  |
| novel-locus_397 | chr8  | 140201079 | 140282038 |
| novel-locus_398 | chr6  | 47503109  | 47574626  |
| novel-locus_400 | chr21 | 33726140  | 33805201  |
| novel-locus_403 | chr2  | 238308435 | 238378520 |
| novel-locus_404 | chr22 | 49006330  | 49030376  |
| novel-locus_405 | chr12 | 71835647  | 71907496  |
| novel-locus_406 | chr17 | 75631905  | 75711696  |
| novel-locus_409 | chr11 | 7755871   | 7861303   |
| novel-locus_411 | chrX  | 49637575  | 49658722  |
| novel-locus_412 | chr10 | 35898429  | 35980340  |
| novel-locus_413 | chr7  | 147496806 | 147577214 |
| novel-locus_419 | chr3  | 42323395  | 42400728  |
| novel-locus_420 | chr19 | 23257373  | 23341795  |
| novel-locus_422 | chr1  | 72480921  | 72555312  |
| novel-locus_424 | chr2  | 206876550 | 206955276 |
| novel-locus_430 | chr4  | 75888432  | 75897435  |
| novel-locus_431 | chr8  | 103466241 | 103540446 |
| novel-locus_432 | chr11 | 1479130   | 1556727   |
| novel-locus_434 | chr1  | 202835136 | 202840150 |
| novel-locus_438 | chr21 | 22141928  | 22142829  |
| novel-locus_441 | chr12 | 7163775   | 7172788   |
| novel-locus_443 | chr6  | 26113395  | 26190934  |
| novel-locus_445 | chr22 | 39980738  | 39985767  |
| novel-locus_452 | chr14 | 45853679  | 45928667  |
| novel-locus_464 | chr19 | 3412333   | 3413231   |
| novel-locus_471 | chr6  | 166627704 | 166644926 |
| novel-locus_486 | chr1  | 244931381 | 245064453 |
| novel-locus_487 | chr1  | 23309076  | 23387660  |
| novel-locus_492 | chr1  | 45795821  | 45814176  |
| novel-locus_498 | chr2  | 41606020  | 41611819  |
| novel-locus_499 | chr17 | 51355578  | 51356317  |
| novel-locus_506 | chr16 | 66267237  | 66340089  |
| novel-locus_508 | chr9  | 131223632 | 131303084 |
| novel-locus_514 | chr20 | 42049424  | 42126436  |
| novel-locus_515 | chr6  | 167343700 | 167421425 |
| novel-locus_517 | chr19 | 3900225   | 3978555   |
| novel-locus_525 | chr1  | 165056626 | 165061354 |
| novel-locus_527 | chr6  | 168498247 | 168498830 |
| novel-locus_528 | chr4  | 175578544 | 175652233 |
| novel-locus_534 | chr22 | 35545798  | 35623542  |
| novel-locus_539 | chr4  | 54590542  | 54671223  |
| novel-locus_541 | chr20 | 60765616  | 60774959  |
| novel-locus_542 | chr1  | 22611594  | 22866272  |
| novel-locus_545 | chr2  | 26430855  | 26508234  |
| novel-locus_547 | chr1  | 163868131 | 163944393 |
| novel-locus_548 | chr11 | 55860598  | 55941107  |
| novel-locus_549 | chr10 | 45185815  | 45189290  |

|                 |       |           |           |
|-----------------|-------|-----------|-----------|
| novel-locus_550 | chr10 | 66913778  | 66991268  |
| novel-locus_552 | chr13 | 28015984  | 28096159  |
| novel-locus_559 | chr4  | 77064193  | 77069909  |
| novel-locus_561 | chr12 | 131333046 | 131334407 |
| novel-locus_566 | chr1  | 87186345  | 87255943  |
| novel-locus_568 | chr3  | 155340238 | 155422266 |
| novel-locus_569 | chr20 | 34320237  | 34500535  |
| novel-locus_571 | chr22 | 47737162  | 47741990  |
| novel-locus_572 | chr13 | 83780623  | 83859087  |
| novel-locus_579 | chr11 | 23288572  | 23360655  |
| novel-locus_585 | chr9  | 425236    | 495590    |
| novel-locus_587 | chr8  | 143963816 | 143978558 |
| novel-locus_588 | chr19 | 4657087   | 4729098   |
| novel-locus_593 | chr1  | 17277403  | 17403684  |
| novel-locus_595 | chr14 | 91130504  | 91213247  |
| novel-locus_596 | chr18 | 73906706  | 73911436  |
| novel-locus_598 | chr14 | 81147136  | 81224222  |
| novel-locus_600 | chr9  | 135426316 | 135508740 |
| novel-locus_605 | chr4  | 21238070  | 21238981  |
| novel-locus_607 | chr2  | 3105907   | 3111199   |
| novel-locus_615 | chr5  | 68515572  | 68589020  |
| novel-locus_616 | chr7  | 8835046   | 8903291   |
| novel-locus_618 | chrX  | 153269284 | 153272694 |
| novel-locus_627 | chr19 | 7240485   | 7242010   |
| novel-locus_628 | chr12 | 1010794   | 1090060   |
| novel-locus_632 | chr4  | 31670240  | 31674586  |
| novel-locus_634 | chr18 | 39597622  | 39598350  |
| novel-locus_636 | chr1  | 242110099 | 242188954 |
| novel-locus_641 | chr17 | 59758532  | 59838455  |
| novel-locus_647 | chr2  | 4919965   | 4997319   |
| novel-locus_648 | chr9  | 76826895  | 76827659  |
| novel-locus_650 | chr6  | 90601640  | 90607960  |
| novel-locus_654 | chr16 | 67668976  | 67820339  |
| novel-locus_656 | chr12 | 6890387   | 7026836   |
| novel-locus_659 | chr7  | 146791242 | 146791880 |
| novel-locus_667 | chr17 | 4690715   | 4768384   |
| novel-locus_673 | chr8  | 96344941  | 96345746  |
| novel-locus_676 | chr2  | 239290394 | 239363341 |
| novel-locus_686 | chr4  | 56482404  | 56492204  |
| novel-locus_687 | chr2  | 136385564 | 136464616 |
| novel-locus_692 | chr11 | 47581644  | 47655493  |
| novel-locus_693 | chr6  | 8631505   | 8632341   |
| novel-locus_695 | chr11 | 23036298  | 23036527  |
| novel-locus_701 | chr6  | 47779504  | 47780315  |
| novel-locus_704 | chr3  | 156469963 | 156547188 |
| novel-locus_707 | chr21 | 23713599  | 23716366  |
| novel-locus_711 | chr11 | 101259654 | 101263034 |
| novel-locus_721 | chr3  | 113329103 | 113401614 |
| novel-locus_723 | chr8  | 28217714  | 28218595  |



|                 |       |           |           |
|-----------------|-------|-----------|-----------|
| novel-locus_724 | chr4  | 155402315 | 155475287 |
| novel-locus_727 | chr19 | 46695220  | 46770921  |
| novel-locus_729 | chr14 | 89004365  | 89005271  |
| novel-locus_733 | chr10 | 79335632  | 79336433  |
| novel-locus_739 | chr16 | 85539372  | 85615300  |
| novel-locus_742 | chr15 | 97405595  | 97487762  |
| novel-locus_743 | chr11 | 11215533  | 11284026  |
| novel-locus_745 | chr8  | 117792667 | 117794529 |
| novel-locus_749 | chr13 | 80273212  | 80273970  |
| novel-locus_751 | chr1  | 240296368 | 240371490 |
| novel-locus_753 | chr3  | 20274500  | 20358068  |
| novel-locus_758 | chr2  | 759002    | 835377    |
| novel-locus_760 | chr3  | 126251164 | 126333743 |
| novel-locus_763 | chr17 | 7105901   | 7185216   |
| novel-locus_764 | chrX  | 46071093  | 46078716  |
| novel-locus_774 | chr1  | 55455355  | 55460119  |
| novel-locus_776 | chr2  | 109648566 | 109652701 |
| novel-locus_784 | chr8  | 141007450 | 141079160 |
| novel-locus_786 | chr14 | 48519669  | 48598232  |
| novel-locus_790 | chrX  | 77300162  | 77300827  |
| novel-locus_848 | chr2  | 26806201  | 26888743  |
| novel-locus_857 | chr8  | 52825664  | 52829427  |
| novel-locus_860 | chr1  | 33278871  | 33284501  |
| novel-locus_865 | chr9  | 125614213 | 125696264 |
| novel-locus_867 | chr2  | 231067405 | 231068105 |
| novel-locus_879 | chr2  | 116372059 | 116449844 |
| novel-locus_895 | chrX  | 115454488 | 115455730 |
| novel-locus_898 | chr4  | 59535726  | 59544386  |
| novel-locus_909 | chr4  | 30174882  | 30251778  |
| novel-locus_910 | chr3  | 176541606 | 176542272 |
| novel-locus_911 | chr7  | 4590890   | 4591651   |
| novel-locus_914 | chr3  | 152827893 | 152899795 |
| novel-locus_917 | chr11 | 30869774  | 30947788  |
| novel-locus_921 | chr12 | 56720429  | 56726359  |
| novel-locus_922 | chr3  | 51405432  | 51481083  |
| novel-locus_923 | chr16 | 26050677  | 26130094  |
| novel-locus_924 | chr13 | 102106237 | 102183846 |
| novel-locus_927 | chr7  | 154505696 | 154515878 |
| novel-locus_929 | chr8  | 41842601  | 41919355  |
| novel-locus_930 | chr1  | 113216157 | 113292540 |
| novel-locus_932 | chr8  | 142820821 | 142900760 |
| novel-locus_934 | chr1  | 216431885 | 216505446 |
| novel-locus_940 | chr1  | 105788134 | 105867015 |
| novel-locus_941 | chr16 | 1899983   | 1900735   |
| novel-locus_944 | chr5  | 36559945  | 36633964  |
| novel-locus_948 | chr14 | 24771450  | 24851269  |
| novel-locus_949 | chr19 | 341285    | 427658    |
| novel-locus_952 | chr4  | 32582916  | 32585541  |
| novel-locus_955 | chr1  | 231856703 | 231936127 |

|                  |       |           |           |
|------------------|-------|-----------|-----------|
| novel-locus_959  | chr12 | 122879703 | 122958700 |
| novel-locus_960  | chr6  | 57461337  | 57538663  |
| novel-locus_966  | chr3  | 177467790 | 177473967 |
| novel-locus_968  | chr8  | 129769005 | 129849253 |
| novel-locus_969  | chr1  | 104156660 | 104232417 |
| novel-locus_976  | chr17 | 8661213   | 8739724   |
| novel-locus_977  | chr18 | 1790427   | 1870817   |
| novel-locus_979  | chr11 | 69858071  | 69933114  |
| novel-locus_980  | chr6  | 111556822 | 111632489 |
| novel-locus_981  | chr6  | 28208187  | 28289091  |
| novel-locus_989  | chr4  | 14671100  | 14673808  |
| novel-locus_991  | chr9  | 36497236  | 36497555  |
| novel-locus_996  | chr16 | 8034648   | 8114328   |
| novel-locus_1001 | chr13 | 48344731  | 48420797  |
| novel-locus_1003 | chr21 | 43249158  | 43328009  |
| novel-locus_1004 | chr16 | 71906893  | 71907441  |
| novel-locus_1011 | chr17 | 76557923  | 76559017  |
| novel-locus_1013 | chr22 | 19144260  | 19220761  |
| novel-locus_1015 | chr10 | 47162731  | 47163520  |
| novel-locus_1016 | chr14 | 103390061 | 103469589 |
| novel-locus_1019 | chr3  | 104565597 | 104638695 |
| novel-locus_1021 | chrX  | 148792028 | 148795766 |
| novel-locus_1023 | chr22 | 48030441  | 48031854  |
| novel-locus_1024 | chr7  | 153837847 | 153857864 |
| novel-locus_1027 | chr10 | 121193888 | 121194691 |
| novel-locus_1042 | chr2  | 133020493 | 133025391 |
| novel-locus_1043 | chr11 | 18316057  | 18391475  |
| novel-locus_1045 | chr15 | 87646370  | 87726367  |
| novel-locus_1046 | chr13 | 57772531  | 57853916  |
| novel-locus_1050 | chr21 | 18054857  | 18063247  |
| novel-locus_1055 | chrX  | 4660017   | 4660693   |
| novel-locus_1058 | chr12 | 52844765  | 52927758  |
| novel-locus_1062 | chr2  | 94778948  | 94779774  |
| novel-locus_1064 | chr8  | 137067558 | 137144659 |
| novel-locus_1072 | chr10 | 129362351 | 129442606 |
| novel-locus_1073 | chr1  | 230612928 | 230688944 |
| novel-locus_1075 | chr15 | 24648685  | 24653323  |
| novel-locus_1076 | chr12 | 53736210  | 53737044  |
| novel-locus_1077 | chr6  | 68339493  | 68413803  |
| novel-locus_1078 | chr10 | 84996773  | 85007367  |
| novel-locus_1079 | chr4  | 66595153  | 66596642  |
| novel-locus_1081 | chr17 | 18175017  | 18180681  |
| novel-locus_1085 | chr9  | 8962753   | 8963633   |
| novel-locus_1090 | chr1  | 82395292  | 82471368  |
| novel-locus_1093 | chr9  | 24931453  | 25012018  |
| novel-locus_1099 | chr21 | 33087575  | 33166499  |
| novel-locus_1111 | chr16 | 69849507  | 69922166  |
| novel-locus_1116 | chr6  | 65117910  | 65118698  |
| novel-locus_1117 | chr8  | 62251035  | 62323984  |

|                        |           |           |
|------------------------|-----------|-----------|
| novel-locus_1118 chr9  | 101165070 | 101239260 |
| novel-locus_1127 chr7  | 8182765   | 8186116   |
| novel-locus_1128 chr1  | 29652644  | 29653551  |
| novel-locus_1131 chr10 | 28332956  | 28411469  |
| novel-locus_1132 chr3  | 3167290   | 3174264   |
| novel-locus_1133 chr3  | 96094684  | 96170632  |
| novel-locus_1134 chr14 | 57443692  | 57520089  |
| novel-locus_1138 chr2  | 109524077 | 109533725 |
| novel-locus_1145 chr8  | 50749998  | 50827856  |
| novel-locus_1151 chr5  | 155155412 | 155163193 |
| novel-locus_1152 chr13 | 89080921  | 89153453  |
| novel-locus_1160 chr9  | 89532348  | 89534743  |
| novel-locus_1164 chr14 | 82618348  | 82695497  |
| novel-locus_1173 chr15 | 72252005  | 72333336  |
| novel-locus_1176 chr21 | 46004959  | 46077013  |
| novel-locus_1179 chr11 | 125971515 | 126047969 |
| novel-locus_1181 chr20 | 5707232   | 5712082   |

**Supplementary Table 3** FISH analysis of orphan clones  
Summary of FISH results from fosmids corresponding to 68 orphan contigs established based on fingerprinting from genomic library, G248 (WIBR2, NA15510).

| <b>Classification</b> | <b>Number of Contigs</b> |
|-----------------------|--------------------------|
| Assembly Gap          | 31 (45%)                 |
| Interstitial          | 15 (22%)                 |
| Telomeric             | 10 (15%)                 |
| Acrocentric           | 8 (12%)                  |
| Pericentromeric       | 4 (6%)                   |

**Supplementary Table 5** Noise-multiplier results

The 890 contigs identified as polymorphic using the noise-multiplier approach are listed.

**Contig Name**

freeze2\_10009  
freeze2\_10056  
freeze2\_10062  
freeze2\_10068  
freeze2\_10077  
freeze2\_10083  
freeze2\_10116  
freeze2\_10139  
freeze2\_10200  
freeze2\_103  
freeze2\_10302  
freeze2\_10363  
freeze2\_10397  
freeze2\_10443  
freeze2\_10459  
freeze2\_10478  
freeze2\_10585  
freeze2\_1060  
freeze2\_10726  
freeze2\_10750  
freeze2\_10806  
freeze2\_109  
freeze2\_10901  
freeze2\_1093  
freeze2\_10952  
freeze2\_1097  
freeze2\_10972  
freeze2\_10988  
freeze2\_10991  
freeze2\_11001  
freeze2\_11030  
freeze2\_11104  
freeze2\_11227  
freeze2\_11258  
freeze2\_11285  
freeze2\_11303  
freeze2\_11323  
freeze2\_11329  
freeze2\_11344  
freeze2\_11358  
freeze2\_11371  
freeze2\_114  
freeze2\_11402  
freeze2\_11438  
freeze2\_11445  
freeze2\_11473

freeze2\_11487  
freeze2\_11506  
freeze2\_11513  
freeze2\_11535  
freeze2\_11537  
freeze2\_11545  
freeze2\_11546  
freeze2\_1155  
freeze2\_11592  
freeze2\_11637  
freeze2\_11667  
freeze2\_11674  
freeze2\_11675  
freeze2\_11677  
freeze2\_11729  
freeze2\_11812  
freeze2\_11862  
freeze2\_11903  
freeze2\_11957  
freeze2\_11963  
freeze2\_11991  
freeze2\_12  
freeze2\_12001  
freeze2\_12005  
freeze2\_12043  
freeze2\_12072  
freeze2\_12123  
freeze2\_12167  
freeze2\_12205  
freeze2\_1226  
freeze2\_12320  
freeze2\_12368  
freeze2\_12370  
freeze2\_12378  
freeze2\_1243  
freeze2\_12437  
freeze2\_12485  
freeze2\_125  
freeze2\_12556  
freeze2\_12568  
freeze2\_1260  
freeze2\_1264  
freeze2\_12644  
freeze2\_12693  
freeze2\_12696  
freeze2\_127  
freeze2\_12727  
freeze2\_12735  
freeze2\_12750

freeze2\_12760  
freeze2\_12778  
freeze2\_12823  
freeze2\_12833  
freeze2\_12874  
freeze2\_12957  
freeze2\_12989  
freeze2\_13048  
freeze2\_13063  
freeze2\_13072  
freeze2\_13082  
freeze2\_13086  
freeze2\_13089  
freeze2\_13099  
freeze2\_13142  
freeze2\_13156  
freeze2\_13185  
freeze2\_13215  
freeze2\_1332  
freeze2\_13343  
freeze2\_13357  
freeze2\_13368  
freeze2\_13373  
freeze2\_13377  
freeze2\_1338  
freeze2\_13401  
freeze2\_13424  
freeze2\_13434  
freeze2\_13438  
freeze2\_13472  
freeze2\_13491  
freeze2\_13606  
freeze2\_13627  
freeze2\_13649  
freeze2\_1365  
freeze2\_13702  
freeze2\_13757  
freeze2\_13829  
freeze2\_1388  
freeze2\_13902  
freeze2\_13917  
freeze2\_13947  
freeze2\_13953  
freeze2\_13993  
freeze2\_140  
freeze2\_14037  
freeze2\_14073  
freeze2\_14082  
freeze2\_14102

freeze2\_14103\_altContig2

freeze2\_14131

freeze2\_14139

freeze2\_14155

freeze2\_14166

freeze2\_14202

freeze2\_14204

freeze2\_14213

freeze2\_14226

freeze2\_14232

freeze2\_1424

freeze2\_14272

freeze2\_14293

freeze2\_14296

freeze2\_14380

freeze2\_14384

freeze2\_14455

freeze2\_14641

freeze2\_14655

freeze2\_14667

freeze2\_14737

freeze2\_14757

freeze2\_14761

freeze2\_14770

freeze2\_14777

freeze2\_14778

freeze2\_14793

freeze2\_14800

freeze2\_14805

freeze2\_14818

freeze2\_14832

freeze2\_14842

freeze2\_14850

freeze2\_14871

freeze2\_14898

freeze2\_1491

freeze2\_14913

freeze2\_14942

freeze2\_14949

freeze2\_14950

freeze2\_14951

freeze2\_14956

freeze2\_14983

freeze2\_14987

freeze2\_14992

freeze2\_14993

freeze2\_15012

freeze2\_15031

freeze2\_15037



freeze2\_15080  
freeze2\_15092  
freeze2\_15093  
freeze2\_15118  
freeze2\_15121  
freeze2\_15143  
freeze2\_15175  
freeze2\_1530  
freeze2\_15555  
freeze2\_15578  
freeze2\_15587  
freeze2\_15604  
freeze2\_1562  
freeze2\_15663  
freeze2\_15783  
freeze2\_15808  
freeze2\_16014  
freeze2\_16018  
freeze2\_1605  
freeze2\_16063  
freeze2\_16064\_altContig2  
freeze2\_16084  
freeze2\_16100  
freeze2\_1612  
freeze2\_16138  
freeze2\_16232  
freeze2\_1633  
freeze2\_1645  
freeze2\_16469  
freeze2\_1652  
freeze2\_16642  
freeze2\_16670  
freeze2\_16673  
freeze2\_16686  
freeze2\_16744  
freeze2\_16758  
freeze2\_1677  
freeze2\_1680  
freeze2\_16801  
freeze2\_16829  
freeze2\_169  
freeze2\_16913  
freeze2\_16944  
freeze2\_16955  
freeze2\_1698  
freeze2\_16997  
freeze2\_17012  
freeze2\_17086  
freeze2\_17255

freeze2\_17303  
freeze2\_1735  
freeze2\_17375  
freeze2\_17461  
freeze2\_17629  
freeze2\_1765  
freeze2\_17764  
freeze2\_178  
freeze2\_17820  
freeze2\_17847  
freeze2\_17872  
freeze2\_179  
freeze2\_1794  
freeze2\_18067  
freeze2\_18168  
freeze2\_1817  
freeze2\_18229  
freeze2\_18239  
freeze2\_18283  
freeze2\_1832  
freeze2\_18430  
freeze2\_1849  
freeze2\_1852  
freeze2\_1856  
freeze2\_18567  
freeze2\_18585  
freeze2\_1883  
freeze2\_1901  
freeze2\_19089  
freeze2\_1912  
freeze2\_1916  
freeze2\_192  
freeze2\_193  
freeze2\_19364  
freeze2\_19478  
freeze2\_1953  
freeze2\_197  
freeze2\_1980  
freeze2\_19865  
freeze2\_1990  
freeze2\_19958  
freeze2\_2009  
freeze2\_2012  
freeze2\_2021  
freeze2\_2022  
freeze2\_2027  
freeze2\_2049  
freeze2\_20507  
freeze2\_206

freeze2\_2065  
freeze2\_20760  
freeze2\_2087  
freeze2\_2095  
freeze2\_21084  
freeze2\_2129  
freeze2\_213  
freeze2\_2140  
freeze2\_21411  
freeze2\_21425  
freeze2\_21451  
freeze2\_21461  
freeze2\_21475  
freeze2\_21545  
freeze2\_216  
freeze2\_21606  
freeze2\_21617  
freeze2\_21640  
freeze2\_21707  
freeze2\_21737  
freeze2\_21764  
freeze2\_21793  
freeze2\_21846  
freeze2\_21884  
freeze2\_21967  
freeze2\_22039  
freeze2\_22136  
freeze2\_2216  
freeze2\_22235  
freeze2\_22334  
freeze2\_22358  
freeze2\_22361  
freeze2\_22404  
freeze2\_22421  
freeze2\_22485  
freeze2\_22530  
freeze2\_22587  
freeze2\_22708  
freeze2\_2275  
freeze2\_22846  
freeze2\_22974  
freeze2\_22990  
freeze2\_23044  
freeze2\_23166  
freeze2\_23236  
freeze2\_23335  
freeze2\_23398  
freeze2\_23429  
freeze2\_2345

freeze2\_23489  
freeze2\_23569  
freeze2\_23611  
freeze2\_2372  
freeze2\_23740  
freeze2\_23888  
freeze2\_2394  
freeze2\_24019  
freeze2\_24255  
freeze2\_2441  
freeze2\_2444  
freeze2\_24444  
freeze2\_2448  
freeze2\_24679  
freeze2\_24687  
freeze2\_2470  
freeze2\_24756  
freeze2\_2484  
freeze2\_24857  
freeze2\_2506  
freeze2\_2512  
freeze2\_25394  
freeze2\_2541  
freeze2\_2556  
freeze2\_25577  
freeze2\_25833  
freeze2\_2602  
freeze2\_2606  
freeze2\_261  
freeze2\_26162  
freeze2\_26185  
freeze2\_26317  
freeze2\_2634  
freeze2\_26401  
freeze2\_26654  
freeze2\_2667  
freeze2\_26743  
freeze2\_2676  
freeze2\_26974  
freeze2\_27056  
freeze2\_27156  
freeze2\_27232  
freeze2\_27382  
freeze2\_27393  
freeze2\_27459  
freeze2\_27464  
freeze2\_27469  
freeze2\_2749  
freeze2\_27549

freeze2\_27555  
freeze2\_27613  
freeze2\_27662  
freeze2\_27721  
freeze2\_27818  
freeze2\_2796  
freeze2\_27968  
freeze2\_27989  
freeze2\_2833  
freeze2\_2836  
freeze2\_2838  
freeze2\_28529  
freeze2\_28534  
freeze2\_28582  
freeze2\_2866  
freeze2\_2872  
freeze2\_2876  
freeze2\_28819  
freeze2\_2905  
freeze2\_29125  
freeze2\_2914  
freeze2\_29188  
freeze2\_2920  
freeze2\_2931  
freeze2\_29354  
freeze2\_29400  
freeze2\_2951  
freeze2\_29516  
freeze2\_29558  
freeze2\_29606  
freeze2\_29620  
freeze2\_29698  
freeze2\_29724  
freeze2\_2979  
freeze2\_29818  
freeze2\_29836  
freeze2\_29892  
freeze2\_29985  
freeze2\_29998  
freeze2\_30072  
freeze2\_3010  
freeze2\_30177  
freeze2\_3018  
freeze2\_30187  
freeze2\_3019  
freeze2\_30191  
freeze2\_30380  
freeze2\_30403  
freeze2\_3047

freeze2\_30540  
freeze2\_30556  
freeze2\_3060  
freeze2\_30602  
freeze2\_30603  
freeze2\_30701  
freeze2\_30722  
freeze2\_30798  
freeze2\_308  
freeze2\_30900  
freeze2\_3092  
freeze2\_31  
freeze2\_31075  
freeze2\_31141  
freeze2\_31171  
freeze2\_315  
freeze2\_31540  
freeze2\_3155  
freeze2\_31622  
freeze2\_3168  
freeze2\_3172  
freeze2\_31723  
freeze2\_31747  
freeze2\_3176  
freeze2\_31780  
freeze2\_3179  
freeze2\_31863  
freeze2\_31954  
freeze2\_3198  
freeze2\_3199  
freeze2\_32  
freeze2\_3220  
freeze2\_32208  
freeze2\_3236  
freeze2\_3248  
freeze2\_325  
freeze2\_3250  
freeze2\_3259  
freeze2\_3277  
freeze2\_328  
freeze2\_3280  
freeze2\_3308  
freeze2\_3322  
freeze2\_335  
freeze2\_3363  
freeze2\_3364  
freeze2\_3366  
freeze2\_3381  
freeze2\_3392

freeze2\_3398  
freeze2\_3399  
freeze2\_34028  
freeze2\_3417  
freeze2\_34205  
freeze2\_3427  
freeze2\_34340  
freeze2\_3436  
freeze2\_34468  
freeze2\_3447  
freeze2\_3450  
freeze2\_3455  
freeze2\_3464  
freeze2\_34648  
freeze2\_3473  
freeze2\_3474  
freeze2\_34944  
freeze2\_3496  
freeze2\_3515  
freeze2\_35164  
freeze2\_3519  
freeze2\_3531  
freeze2\_3558  
freeze2\_35607  
freeze2\_3565  
freeze2\_3583  
freeze2\_35865  
freeze2\_3595  
freeze2\_3597  
freeze2\_3598  
freeze2\_3604  
freeze2\_3614  
freeze2\_3617  
freeze2\_362  
freeze2\_368  
freeze2\_3686  
freeze2\_3697  
freeze2\_3734  
freeze2\_3739  
freeze2\_3755  
freeze2\_3783  
freeze2\_381  
freeze2\_3839  
freeze2\_3854  
freeze2\_389  
freeze2\_3897  
freeze2\_3915  
freeze2\_3944  
freeze2\_3948

freeze2\_3967  
freeze2\_4067  
freeze2\_415  
freeze2\_4250  
freeze2\_436  
freeze2\_4387  
freeze2\_4422  
freeze2\_4434  
freeze2\_4446  
freeze2\_449  
freeze2\_4585  
freeze2\_4589  
freeze2\_4605  
freeze2\_4607  
freeze2\_4613  
freeze2\_4658  
freeze2\_470  
freeze2\_4708  
freeze2\_478  
freeze2\_4797  
freeze2\_481  
freeze2\_489  
freeze2\_500  
freeze2\_5022  
freeze2\_5031  
freeze2\_5056  
freeze2\_507  
freeze2\_51  
freeze2\_5183  
freeze2\_5201  
freeze2\_5207  
freeze2\_5211  
freeze2\_5213  
freeze2\_5267  
freeze2\_527  
freeze2\_5288  
freeze2\_53  
freeze2\_5308  
freeze2\_5317  
freeze2\_5340  
freeze2\_5385  
freeze2\_5427  
freeze2\_544  
freeze2\_545  
freeze2\_5461  
freeze2\_5463  
freeze2\_5475  
freeze2\_5498  
freeze2\_5500



freeze2\_5513  
freeze2\_5533  
freeze2\_5553  
freeze2\_5555  
freeze2\_5578  
freeze2\_5619  
freeze2\_5624  
freeze2\_5630  
freeze2\_5667  
freeze2\_5672  
freeze2\_5693  
freeze2\_5712  
freeze2\_5719  
freeze2\_5733  
freeze2\_5742  
freeze2\_5756  
freeze2\_5769  
freeze2\_5770  
freeze2\_5780  
freeze2\_5785  
freeze2\_5791  
freeze2\_5817  
freeze2\_5820  
freeze2\_5829  
freeze2\_5833  
freeze2\_5857  
freeze2\_5869  
freeze2\_5870  
freeze2\_5872  
freeze2\_5919  
freeze2\_5920  
freeze2\_5930  
freeze2\_5953  
freeze2\_5958  
freeze2\_5964  
freeze2\_5995  
freeze2\_6019  
freeze2\_6081  
freeze2\_6084  
freeze2\_6115  
freeze2\_6139  
freeze2\_615  
freeze2\_6156  
freeze2\_6157  
freeze2\_6166  
freeze2\_6167  
freeze2\_6193  
freeze2\_6219  
freeze2\_6224

freeze2\_6237  
freeze2\_6262  
freeze2\_6264  
freeze2\_6269  
freeze2\_6276  
freeze2\_6286  
freeze2\_6314  
freeze2\_6316  
freeze2\_6321  
freeze2\_6329  
freeze2\_6340  
freeze2\_6348  
freeze2\_6351  
freeze2\_6394  
freeze2\_6414  
freeze2\_6450  
freeze2\_646  
freeze2\_6479  
freeze2\_6503  
freeze2\_6510  
freeze2\_6516  
freeze2\_652  
freeze2\_6538  
freeze2\_6543  
freeze2\_6563  
freeze2\_6604  
freeze2\_6641  
freeze2\_6647  
freeze2\_6649  
freeze2\_6650  
freeze2\_6709  
freeze2\_6729  
freeze2\_6766  
freeze2\_6784  
freeze2\_6805  
freeze2\_6824  
freeze2\_688  
freeze2\_6915  
freeze2\_6921  
freeze2\_6924  
freeze2\_6925  
freeze2\_6965  
freeze2\_6982  
freeze2\_6985  
freeze2\_6987  
freeze2\_6997  
freeze2\_7027  
freeze2\_7055  
freeze2\_7058

freeze2\_706  
freeze2\_7075  
freeze2\_7115  
freeze2\_7117  
freeze2\_7129  
freeze2\_7161  
freeze2\_7169  
freeze2\_7175  
freeze2\_7223  
freeze2\_7241  
freeze2\_7272  
freeze2\_7276  
freeze2\_7280  
freeze2\_7391  
freeze2\_7397  
freeze2\_7400  
freeze2\_7405  
freeze2\_741  
freeze2\_7433  
freeze2\_7436  
freeze2\_7438  
freeze2\_7440  
freeze2\_7461  
freeze2\_7463  
freeze2\_7468  
freeze2\_7486  
freeze2\_7494  
freeze2\_7495  
freeze2\_75  
freeze2\_7504  
freeze2\_7514  
freeze2\_753  
freeze2\_7553  
freeze2\_7562  
freeze2\_7563  
freeze2\_7566  
freeze2\_7567  
freeze2\_7571  
freeze2\_7580  
freeze2\_7595  
freeze2\_76  
freeze2\_7632  
freeze2\_7671  
freeze2\_7683  
freeze2\_7690  
freeze2\_7694  
freeze2\_7707  
freeze2\_7722  
freeze2\_7743

freeze2\_7754  
freeze2\_7763  
freeze2\_7773  
freeze2\_7783  
freeze2\_7795  
freeze2\_7805  
freeze2\_7808  
freeze2\_7812  
freeze2\_7814  
freeze2\_7818  
freeze2\_7822  
freeze2\_7841  
freeze2\_7844  
freeze2\_7848  
freeze2\_7851  
freeze2\_7877  
freeze2\_7906  
freeze2\_7924  
freeze2\_7934  
freeze2\_7935  
freeze2\_795  
freeze2\_7998  
freeze2\_8  
freeze2\_8011  
freeze2\_8012  
freeze2\_8018  
freeze2\_8028  
freeze2\_8030  
freeze2\_8059  
freeze2\_8076  
freeze2\_8111  
freeze2\_8141  
freeze2\_8146  
freeze2\_818  
freeze2\_8191  
freeze2\_8197  
freeze2\_8209  
freeze2\_8214  
freeze2\_8244  
freeze2\_8251  
freeze2\_8263  
freeze2\_8269  
freeze2\_8291  
freeze2\_8309  
freeze2\_8336  
freeze2\_8365  
freeze2\_8369  
freeze2\_8379  
freeze2\_8416

freeze2\_8479  
freeze2\_8486  
freeze2\_85  
freeze2\_856  
freeze2\_857  
freeze2\_8586  
freeze2\_8589  
freeze2\_8628  
freeze2\_8635  
freeze2\_8653  
freeze2\_8662  
freeze2\_8673  
freeze2\_8698  
freeze2\_8701  
freeze2\_8722  
freeze2\_8729  
freeze2\_8755  
freeze2\_8765  
freeze2\_8766  
freeze2\_8772  
freeze2\_8780  
freeze2\_8784  
freeze2\_8785  
freeze2\_8800  
freeze2\_8802  
freeze2\_8808  
freeze2\_8814  
freeze2\_8817  
freeze2\_8824  
freeze2\_8825  
freeze2\_8827  
freeze2\_8852  
freeze2\_8866  
freeze2\_8877  
freeze2\_8882  
freeze2\_8888  
freeze2\_8890  
freeze2\_8895  
freeze2\_8899  
freeze2\_89  
freeze2\_8901  
freeze2\_8918  
freeze2\_8924  
freeze2\_8930  
freeze2\_8935  
freeze2\_8955  
freeze2\_8958  
freeze2\_8959  
freeze2\_8975

freeze2\_8977  
freeze2\_8982  
freeze2\_8990  
freeze2\_8998  
freeze2\_9005  
freeze2\_9014  
freeze2\_9028  
freeze2\_9038  
freeze2\_9050  
freeze2\_9053  
freeze2\_9069  
freeze2\_909  
freeze2\_9113  
freeze2\_9137  
freeze2\_9163  
freeze2\_9190  
freeze2\_9193  
freeze2\_9196  
freeze2\_9254  
freeze2\_9254\_altContig2  
freeze2\_9310  
freeze2\_9310\_altContig2  
freeze2\_9332  
freeze2\_9383  
freeze2\_9388  
freeze2\_9403  
freeze2\_9453  
freeze2\_9476  
freeze2\_9494  
freeze2\_9529  
freeze2\_9542  
freeze2\_9556  
freeze2\_9568  
freeze2\_9596  
freeze2\_9600  
freeze2\_9608  
freeze2\_9613  
freeze2\_9656  
freeze2\_9695  
freeze2\_9716  
freeze2\_9720  
freeze2\_9759  
freeze2\_9773  
freeze2\_9775  
freeze2\_9789  
freeze2\_9790  
freeze2\_9806  
freeze2\_9827  
freeze2\_9843

freeze2\_9863  
freeze2\_9869  
freeze2\_9877  
freeze2\_9897  
freeze2\_9913  
freeze2\_9931  
freeze2\_9938  
freeze2\_9974  
freeze2\_9975  
freeze2\_9980  
freeze2\_9995

**Supplementary Table 9** Novel insertions with high  $V_{ST}$ Loci with a  $V_{ST}$  value greater than 0.5 are listed.

| <b>Approximate Position</b> | <b>Discovery Populations</b> | <b>Insertion Size (kb)</b> | <b>Mean <math>V_{ST}</math></b> | <b><math>F_{ST}</math></b> | <b>Distance to Nearest Gene (kb)</b> | <b>Gene Name</b> |
|-----------------------------|------------------------------|----------------------------|---------------------------------|----------------------------|--------------------------------------|------------------|
| chr8                        | ASN,CEU,G248                 | ~1.7                       | 0.82                            | 0.60                       | 59                                   | <i>PXDNL</i>     |
| chr20                       | ASN,YRI                      | 4.8                        | 0.73                            | 0.70                       | 578                                  | <i>BTBD3</i>     |
| chr16                       | YRI                          | ~0.9                       | 0.71                            | 0.58                       | 1                                    | <i>GFOD2</i>     |
| Unknown                     | YRI                          | ~1.1                       | 0.68                            | 0.31                       | --                                   | --               |
| chr20                       | CEU,YRI                      | ~0.8                       | 0.63                            | 0.53                       | 5                                    | <i>C20orf196</i> |
| chr2                        | ASN,YRI                      | 3.9                        | 0.61                            | 0.49                       | 0                                    | <i>LCT</i>       |
| chr2                        | YRI                          | 3.7                        | 0.58                            | 0.42                       | 13                                   | <i>GPR39</i>     |
| chr10                       | ASN,YRI                      | 5.1                        | 0.57                            | 0.36                       | 234                                  | <i>NRG3</i>      |
| chr22                       | G248,YRI                     | ~0.9                       | 0.54                            | 0.42                       | 1                                    | <i>RANGAPI</i>   |
| chr8                        | ASN,CEU,YRI                  | 9.1                        | 0.54                            | 0.37                       | 42                                   | <i>MLZE</i>      |



**Supplementary Table 11** Composition of sequenced insertions

The repeat and duplication content of the sequenced insertions was determined using RepeatMasker and DupMasker. Results were compared to a data set of the same size randomly sampled from the genome. The 95% confidence interval based on 40 trials is indicated in parentheses.

|              | <b>Sequenced Insertions</b> | <b>NCBI build36<br/>(95% Confidence Interval)</b> |
|--------------|-----------------------------|---------------------------------------------------|
| G+C          | 40.8%                       | 40.9%<br>(39.4% - 42.5%)                          |
| RepeatMasked | 54.9%                       | 47.2%<br>(44.7% - 50.9%)                          |
| DupMasked    | 6.4%                        | 6.4%<br>(3.4% - 10.8%)                            |
| SINEs        | 12.6%                       | 13.8%<br>(11.9% - 16.3%)                          |
| LINEs        | 25.9%                       | 20.3%<br>(16.9% - 23.8%)                          |
| LTR elements | 9.3%                        | 8.3%<br>(6.2% - 10.0%)                            |

**Supplementary Table 12** Comparison of sequenced insertions with GRCh37

Information is given for five regions which have been altered between the build36 and GRCh37 assemblies.

| <b>Fosmid Accession</b> | <b>Build36 Position</b> | <b>Gene</b>   | <b>GRCh37 Status</b>                    | <b>GRCh37 Change</b>                                    |
|-------------------------|-------------------------|---------------|-----------------------------------------|---------------------------------------------------------|
| AC208058, AC210765      | chr17:4733350           | <i>MINK1</i>  | Contains new sequence                   | BAC AC233723                                            |
| AC231962                | chr17:59798472          | <i>PECAMI</i> | New gap, additional<br>sequence missing | Removed BAC AC138744                                    |
| AC221036                | chr17:77112939          | <i>FSCN2</i>  | Contains new sequence                   | BAC AC137896                                            |
| AC234039, AC231118      | chr6:119258178          | <i>ASF1A</i>  | Contains new sequence                   | BAC AL359634 and HuRef<br>ABBA01026024                  |
| AC232309                | chr7:129939130          | <i>COPG2</i>  | Contains new sequence<br>plus a gap     | Fosmids AC144863, AC145656<br>and AC145213 plus new gap |

## Supplementary Note

|                                                                              |           |
|------------------------------------------------------------------------------|-----------|
| <b>1. Focused analysis of orphan clones from a single individual.....</b>    | <b>2</b>  |
| FISH mapping G248 orphan contigs .....                                       | 2         |
| <b>2. Assembling novel sequence contigs from nine individuals .....</b>      | <b>3</b>  |
| Novel sequence loci .....                                                    | 3         |
| Additional filters and removal of mapping artifacts .....                    | 4         |
| <b>3. Custom oligonucleotide array targeting novel sequence contigs.....</b> | <b>6</b>  |
| Filtering by hybridization intensity.....                                    | 6         |
| Filtering additional artifactual probes.....                                 | 7         |
| <b>4. Analysis of other human genomes.....</b>                               | <b>9</b>  |
| <b>5. Analysis of non-human primates.....</b>                                | <b>10</b> |
| <b>6. Polymorphism analysis of novel sequences .....</b>                     | <b>11</b> |
| Noise-multiplier approach .....                                              | 12        |
| Contig genotyping based on cluster fitting .....                             | 13        |
| Comparison of alternative polymorphism calling schemes .....                 | 14        |
| <b>7. High copy-number contigs.....</b>                                      | <b>14</b> |
| <b>8. OligoFISH experiments.....</b>                                         | <b>15</b> |
| <b>9. Analysis of sequenced clones .....</b>                                 | <b>16</b> |
| Variant genotyping using unique breakpoint k-mers.....                       | 19        |
| Capturing larger insertions using OEA clones.....                            | 21        |
| <b>10. Number of insertions represented in each sample.....</b>              | <b>21</b> |
| <b>11. Comparison with Illumina SOAP <i>de novo</i> assembly.....</b>        | <b>23</b> |
| Comparison with individual OEA end sequences .....                           | 23        |
| Comparison with assembled novel insertion contigs.....                       | 23        |
| Comparison with sequenced NA18507 insertions .....                           | 25        |
| <b>12. References.....</b>                                                   | <b>29</b> |

## 1. Focused analysis of orphan clones from a single individual

We conducted an in-depth analysis of orphan clones from a single individual (G248 library, sample NA15510). We identified 4,773 clones where neither end maps against the build35 genome reference despite the presence of high-quality sequence at both ends and where both ends contained at least 100 bp of non-repeatmasked sequence. This requirement removed ~55,000 clones corresponding to alpha-satellite sequence from consideration. We selected 1,499 fosmid clones for restriction fingerprint analysis based on comparisons with chimpanzee WGS data. Useable data from four restriction enzymes was obtained for 1,378 of these clones. We used the Contig Builder program to link together clones into larger contigs based on the restriction map<sup>1</sup>. This resulted in 13 contigs that were formed from 10 or more clones (Table 1.1). These 13 largest contigs account for 82% of the analyzed clones and have a total spanned size of 4.292 Mb. An additional 125 fosmid clones (9%) are in contigs with three or more clones.

| Contig | Clones/Contig | Contig Size (bp) | Clone Depth |
|--------|---------------|------------------|-------------|
| 1      | 277           | 836,359          | 13.8X       |
| 2      | 209           | 653,199          | 11.9X       |
| 3      | 157           | 519,126          | 12.5X       |
| 4      | 134           | 508,651          | 10.9X       |
| 5      | 117           | 478,474          | 10.1X       |
| 6      | 49            | 237,043          | 8.0X        |
| 7      | 45            | 162,090          | 10.7X       |
| 8      | 42            | 208,759          | 8.5X        |
| 9      | 36            | 179,769          | 8.4X        |
| 10     | 19            | 140,018          | 5.8X        |
| 11     | 15            | 135,634          | 4.6X        |
| 12     | 13            | 106,989          | 4.9X        |
| 13     | 11            | 126,681          | 3.8X        |
| Total  | 1124          | 4,292,792        |             |

**Table 1.1** Large contigs built from orphan fosmid clones from the G248 library.

We had been concerned that many orphan clones would come from large blocks of uncharacterized highly repetitive DNA that is not present in the human reference sequence. A reassuring feature of these data is that most of the orphan fosmid clones assembled into a small number of contigs with reasonable values for depth-of-coverage (i.e., the larger contigs have depths comparable to the 10X depth of the G248 fosmid library). After further correcting for likely contaminants (such as Epstein-Barr virus and bacterial sequences), we identified a total of 72 physical contigs encompassing 479 clones. These contigs are estimated to encompass 3.9 Mb of sequence.

### *FISH mapping G248 orphan contigs*

Using individual orphan clones as probes, we determined the position of 68 of these contigs by FISH. We found that 22% (15/68) of the contigs mapped interstitially, 46% (31/68) were associated with genome assembly gaps (based on a targeted study of existing assembly gaps and overlapping clone sequences<sup>1</sup>), and the remainder mapped to

telomeric, pericentromeric, or acrocentric positions (Supplementary Table 3). This analysis indicates that a substantial amount of uncharacterized euchromatic sequence may be recoverable using the fosmid clone library resource, and demonstrates the ability to link together large elements by considering orphan clones.

## 2. Assembling novel sequence contigs from nine individuals

We identified 44,415 high-quality fosmid end sequences from nine individuals that do not map onto the human genome reference sequence (NCBI build35)<sup>2</sup>. This set includes individual sequences from 26,001 one-end anchored clones (OEA) and 9,207 orphan clones. Combined analysis of orphan and OEA clones permits the capture of new insertions larger than the clone insert size (40 kb) as well as anchoring information that can be used to place sequences within the reference assembly. Using phrap (<http://phrap.org>), we assembled these 44,415 sequences into an initial set of 3,963 sequence contigs (total size=4,465,116 bp; max=4,647 bp; N<sub>50</sub>=1,148 bp). Over half of the contigs (2,034/3,963) contain sequence contributed by at least one orphan clone, suggesting that they represent short segments of unrepresented sequences that are longer than 40 kb.

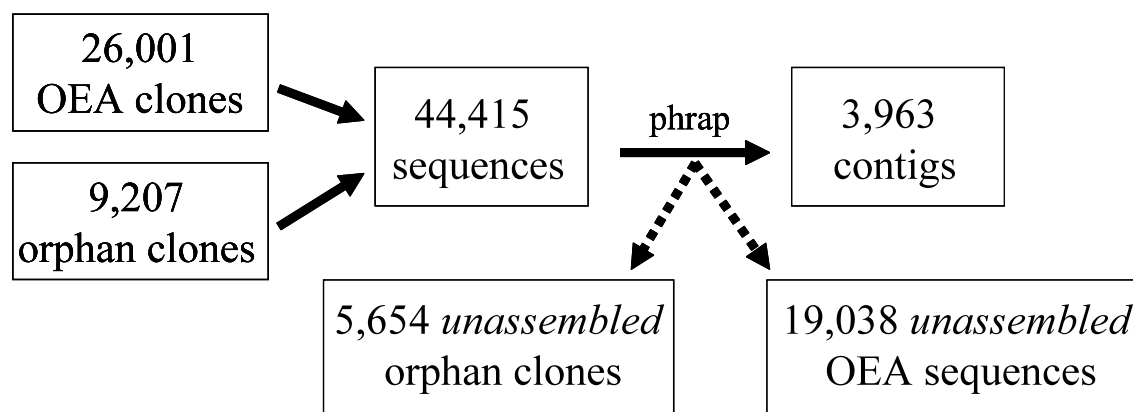

**Figure 2.1** Flow chart of sequence assembly procedure. The 3,963 sequence contigs include contributions from 6,963 OEA and 3,553 orphan clones.

### *Novel sequence loci*

Based on genomic position and orphan clone contributions, we reduced the 3,963 sequence contigs into a set of non-redundant insertion loci. The 3,963 sequence contigs include sequence from 3,553 orphan clones. 51% (2,034/3,963) of the contigs contain sequence contributed by at least one orphan clone, with 1,888 orphan clones contributing to multiple contigs. Mate-pair information from these orphan clones can link 1,677 of the contigs into scaffolds. In total, this information reduces the 3,963 contigs to 2,626 scaffolds, of which 13% of (340/2,626) encompass more than one contig. 59% of the contigs (2,324/3,963) have anchoring information from OEA clones (contigs formed by multiple OEA clones are required to have consistent anchoring within 100 kb). Additionally, we defined 2,354 clusters of anchored contigs by merging contigs anchored within 50 kb of each other (approximately 3 standard deviations above the mean fosmid

insert size). Of these, 281 include multiple contigs. The contig scaffolds make use of paired information from orphan clones and the clustered positions make use of anchoring information from OEA clones. Combining these two methods, the 3,963 contigs are reduced to a set of 1,182 loci.

### ***Additional filters and removal of mapping artifacts***

We applied several additional filters to identify potential artifacts among the 3,963 assembled contigs. First, we conducted an additional computation search comparing the sequences against other sequence databases from GenBank (the nt and HTGS databases). We identified and removed contigs having high identity hits against non-primate genome sequences (such as yeast, mouse, cat and pig) as well as bacterial contaminants. Furthermore, we used the results of array comparative genomic hybridizations to remove additional contaminants as well as sequences that were recalcitrant to effective CGH probe design (described in Section 3 below). Following these steps a total of 2,363 contigs remained (Table 2.2).

| Criteria                      | Number of Contigs | Total Contig Bp | Number of Contigs With Anchor | Number of Loci | Number of Loci With Anchor |
|-------------------------------|-------------------|-----------------|-------------------------------|----------------|----------------------------|
| Assembled                     | 3,963             | 4,465,116       | 2,283                         | 1,182          | 587                        |
| Apply Computational Filter    | 3,702             | 4,197,374       | 2,270                         | 1,063          | 578                        |
| Apply Experimental Filter     | 2,363             | 2,834,149       | 1,551                         | 720            | 418                        |
| Apply NA18507 Artifact Filter | 2,363             | 2,834,149       | 1,490                         | 720            | 400                        |

**Table 2.2** Results of additional filtering steps. The number of contigs, the number of contigs having a clear genomic anchoring, and the associated number of loci and anchored loci are shown after the successive application of each filter. The NA18507 artifact filter applies only to inferred genomic positions and does not remove any contig sequences.

Several lines of evidence indicate that there is a high rate of clone chimerism in the NA18507 (ABC8) clone library. We observe an 8-fold greater fraction of clones with ends mapping to different chromosomes for this library (Table 2.3). Although a small fraction of these trans-chromosomal mapping clones may represent real rearrangements, the majority are likely the result of rearranged clones.

| Library | Sample  | Number of Clones with Unique Mapping | Number of Uniquely Mapped Trans-chromosomal Clones | Percent Trans-chromosomal |
|---------|---------|--------------------------------------|----------------------------------------------------|---------------------------|
| G248    | NA15510 | 594,609                              | 4,135                                              | 0.70%                     |
| ABC7    | NA18517 | 616,947                              | 15,811                                             | 2.56%                     |
| ABC8    | NA18507 | 1,050,579                            | 75,268                                             | 7.16%                     |
| ABC9    | NA18956 | 738,786                              | 4,366                                              | 0.59%                     |
| ABC10   | NA19240 | 741,949                              | 5,305                                              | 0.72%                     |
| ABC11   | NA18555 | 724,998                              | 7,049                                              | 0.97%                     |
| ABC12   | NA12878 | 755,087                              | 3,728                                              | 0.49%                     |
| ABC13   | NA19129 | 757,837                              | 4,889                                              | 0.65%                     |
| ABC14   | NA12156 | 782,310                              | 3,055                                              | 0.39%                     |

**Table 2.3** Fraction of clones from each library with ends mapping to different chromosomes.

We FISH mapped 24 contigs with a predicted location from a single NA18507 anchor. Only one of these contigs mapped to the predicted location while five mapped to a different chromosome and 18 mapped to the p-arms of the acrocentric chromosomes despite a predicted anchoring elsewhere. The intensity of the signals on the acrocentric chromosomes precludes a clear assessment of other hybridization signals that may be present elsewhere in the genome. BLAST searches show that 13 of these contigs match sequenced BACs not included in the genome assembly that have been assigned to 22p<sup>3</sup>. Seven of these contigs also correspond to a group of contigs that show a correlated pattern of drastically increased copy-number based on arrayCGH.

We also examined the complete sequence of an OEA clone from NA18507 (ABC8-43024000F4, AC226835). This clone contains sequence that matches chromosome 6 as well as sequence from a BAC (AL592188) assigned to 22p. PCR primers that amplify DNA isolated from the clone fail to amplify NA18507 genomic DNA, indicating that this clone represents a rearranged structure.

Since assembly requires the presence of overlapping sequence reads, clone artifacts may be enriched among assembled insertions involving sequences from the p-arms of acrocentric chromosomes. This may occur if rearranged clones containing sequence from rDNA repeat arrays are more likely to overlap by chance with true orphan clones representing those sequences. Future studies involving assembly of unmapped sequences derived from high-throughput sequencing should be aware of such mapping and cloning artifacts.

Based on these results we conclude that clone chimerism in the NA18507 library could result in a large fraction of mismapped loci. We note that nearly 50% more clones were obtained from this library than from the others. It is possible that the efforts to increase clone yield from this library led to the increased rate of artifacts. We have therefore removed from analysis all mapping positions for contigs anchored by a single NA18507 OEA clone.

### 3. Custom oligonucleotide array targeting novel sequence contigs

We designed a custom oligonucleotide array with 54,931 probes targeting the novel sequence contigs using relaxed probe design criteria in order to maximize coverage of contigs. We performed a series of arrayCGH experiments comparing individuals from the HapMap<sup>4</sup> project using sample NA15510 as a common reference. This comparison included all nine individuals that were used for sequence discovery. We filtered probes based on two metrics to eliminate contaminants and produced a high-performing array.

#### *Filtering by hybridization intensity*

We assessed the fluorescence hybridization intensity for each probe relative to the background noise level. We examined the distribution of processed fluorescence signals for X-linked probes in male samples and found that a cutoff on the processed signal of 256 ‘counts’ provided clear separation between single copy probes and the background noise as indicated by a set of x-chromosome catalog CGH probes (Figure 3.1). Any probe that did not have a maximum processed signal count above this threshold for any of the nine samples used for the sequence discovery phase was removed from further analysis (Figure 3.2). We employed a similar procedure for a separate array targeting the unassembled single OEA sequences. Since processed signals on that array were slightly lower, a threshold of 181 counts was used.

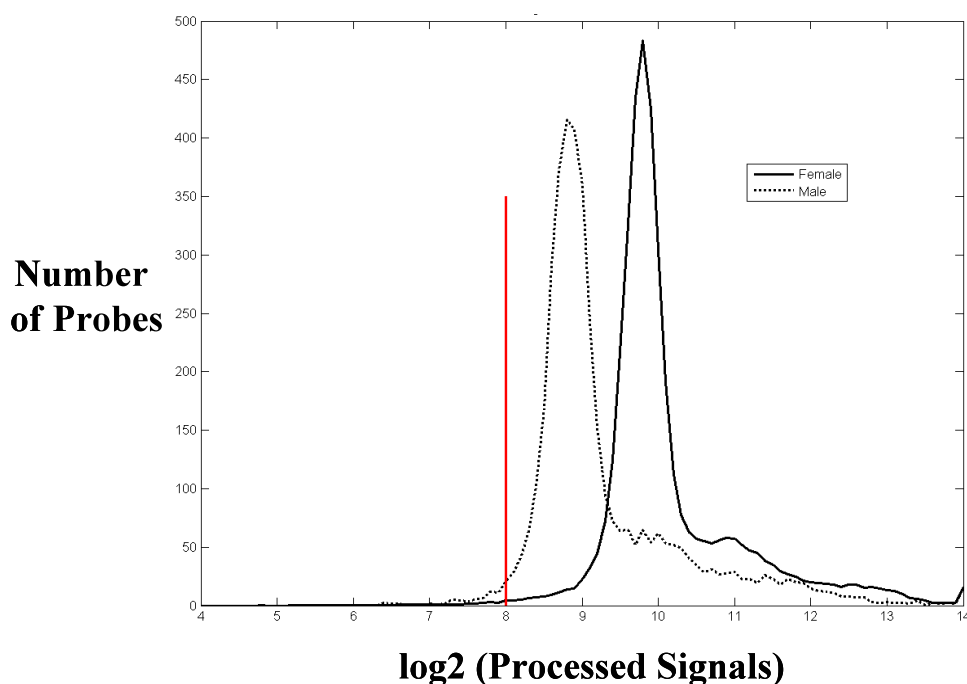

**Figure 3.1** Signal distribution for chrX probes. Histogram of average processed signal counts are shown separately for females (solid line) and males (dashed line). For the novel sequence contigs a value of 256 signal counts (red line,  $\log_2(256)=8$ ) was chosen as a threshold.



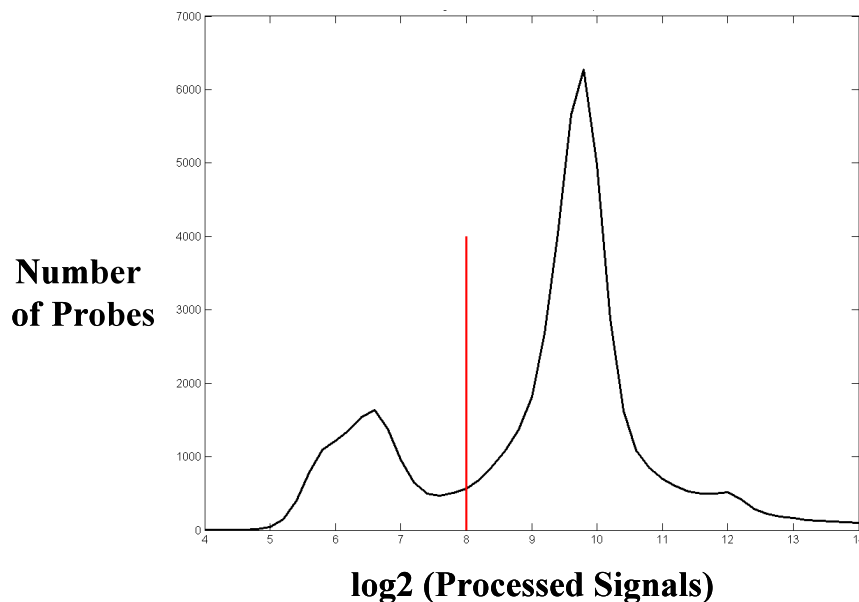

**Figure 3.2** Signal distribution of novel sequence probes. Approximately 16% of the probes did not have a signal above the threshold for any of the nine samples used for discovery and were therefore removed from further analysis.

### *Filtering additional artifactual probes*

An examination of the intensity plots across individual array experiments identified a subset of probes having a variable pattern of intensities that is consistent across all samples but independent of assigned genomic position. We hypothesized that these probes may be enriched for artifactual performance due to abnormal hybridization characteristics. In order to investigate this possibility, we defined clusters of similarly performing probes based on the Pearson correlation of  $\log_2$  ratios across experiments using CAST<sup>5</sup> (Figure 3.3). The three largest clusters contained probes from many different contigs that behaved in a correlated manner independent of contig or chromosome assignment (Figure 3.4).

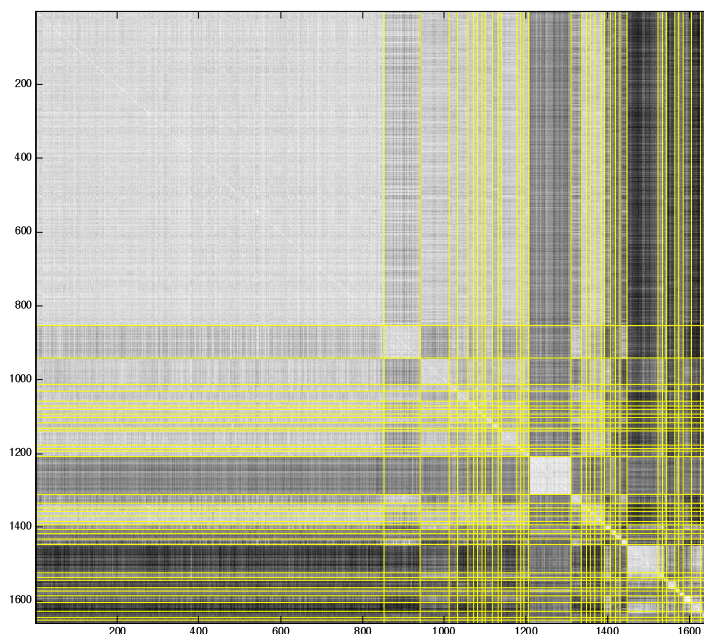

**Figure 3.3** Correlation matrix of log ratios for a subset novel sequence probes. Stronger correlations are indicated by a lighter color. Clusters were defined by a minimum correlation threshold of 0.70 and a minimum cluster size of eight probes. The three largest clusters contain correlated probes from contigs that mapped to multiple different chromosomes (Figure 3.4).

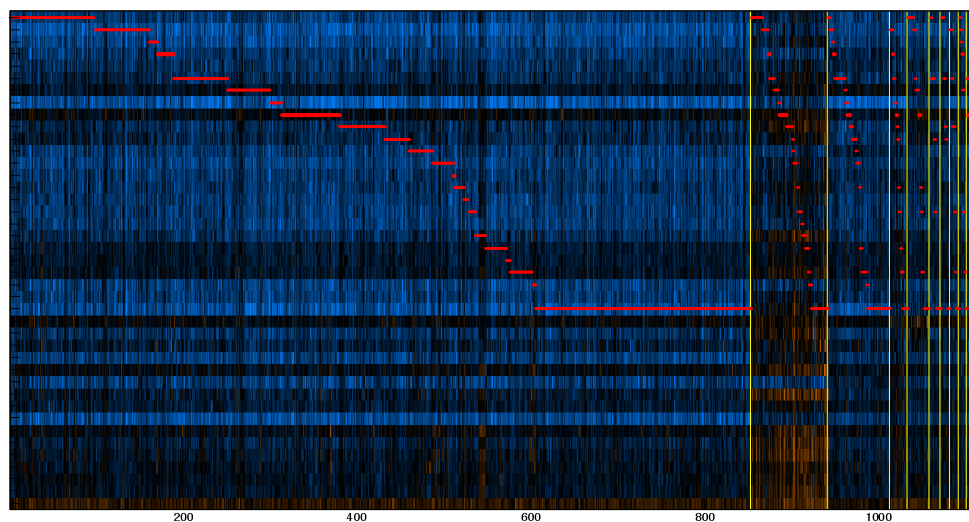

**Figure 3.4** Heat map of  $\log_2$  ratios for the 10 largest clusters. Each row represents a different hybridization experiment and each column is an individual probe. Blue color indicates lower hybridization intensity relative to the reference sample, black indicates the same hybridization intensity, and orange indicates increased hybridization. Vertical yellow lines separate probes assigned to different clusters. Within each cluster, probes are ordered based on their genomic position (based on mapping of OEA clones). The horizontal red lines indicate the chromosomal assignments, with the lowest line indicating unassigned probes. Note that probes mapping throughout the genome show

similar intensity patterns across samples. The artifactual signal we attempt to filter out is represented by the three largest clusters.

We concluded that these clusters represented probes having a reproducible, but artifactual, behavior. We removed all probes that had a correlation with one of the artifactual signatures of 0.7 or greater. Many of these artifactual probes do not pass Agilent's commercial probe design criteria.

Only contigs that were represented by at least three probes that passed all of these criteria were considered for further analysis. Although this strict quality control removes real human sequences from consideration, the applied metrics permit an assessment of copy-number differences among the individuals while reducing false classifications due to sequence and array artifacts.

#### 4. Analysis of other human genomes

We compared the novel sequence contigs against other genome sequences using several approaches. First, we compared the contigs with additional human genome assemblies using megaBLAST (blastall version 2.2.11 with the following options: -e 1e-50 -F F -n T -b 100). We found that a substantial number of contigs that did not pass the arrayCGH probe filtering criteria nonetheless have hits against other human genome assemblies (Table 4.1) thus suggesting that our contaminant and validation filters are conservative and that there are real human sequences that we have excluded.

|                                  | All Contigs<br>(n=3,963) | Pass All<br>Filters<br>(n=2,363) |
|----------------------------------|--------------------------|----------------------------------|
| NCBI build 35<br>(≥100 bp, ≥98%) | 4                        | 3                                |
| NCBI build 36<br>(≥100 bp, ≥98%) | 336                      | 221                              |
| GRCh37<br>(≥100 bp, ≥98%)        | 995                      | 600                              |
| HuRef<br>(≥100 bp, ≥98%)         | 2,084                    | 1,467                            |

**Table 4.1** Comparison of assembled contigs with other human genome assemblies. The four contigs that map against build35 reflect the difference in mapping individual sequence traces as opposed to larger assembled contigs.

We assessed additional mapping information provided by other human assemblies by examining the 320 loci without an assigned build35 position. 175 of these 320 loci consist solely of 'orphan-only' contigs; the remainder are unassigned as a result of artifacts in the ABC8 library (see Supplementary Note section 2) or inconsistent mapping positions among clone-ends, such as occurs when traces have a best match to different copies of repeated or duplicated sequences. We searched end sequences from the individual orphan clones corresponding to these 175 loci against additional human genome assemblies. We found that 21 of these loci have a mapping against the build36

genome assemblies, with 14 of the 21 corresponding to the pseudo-autosomal region of the X and Y chromosomes. Similarly, we observe hits for 54 of the loci against the HuRef assembly. Clones from 35 loci match chromosomal segments from the GRCh37 assembly, with another 36 loci having matches to unplaced sequence contigs included in GRCh37.

Since over 60% of the contigs mapped to the HuRef genome assembly<sup>6</sup>, we explored the presence of these sequences in WGS data from additional human genomes. Using megaBLAST we searched against 74.2 million 454 pyro-sequencing reads from the JDW genome<sup>7</sup> and found matches for 2,001/2,363 hits ( $\geq 100$  bp,  $\geq 98\%$  identity). We also analyzed Illumina sequence data from the YH and NA18507 genomes using mrFAST<sup>8-10</sup>. We considered as present any contig having an estimated median copy number of at least 0.5 based on mapped read depth. By these criteria, 1,716/2,363 contigs are present in YH and 1,698/2,363 in NA18507.

## 5. Analysis of non-human primates

We searched for the presence of the 2,363 contigs in other primate species using two approaches: (1) a bioinformatics search of genome sequence data from chimpanzee and orangutan and (2) an arrayCGH experiment comparing a single chimpanzee with sample NA15510.

We searched the 2,363 contigs against three data sets: the most recent chimpanzee genome assembly (panTro2), chimpanzee whole-genome shotgun (WGS) sequence reads (31.3 million reads, 29.3 Gbp), and orangutan WGS reads (25.5 million reads, 21.7 Gbp). All searches were performed using megaBLAST (blastall version 2.2.11) with the following options: `-e 1e-50 -F F -n T -b 100`. RepeatMasked contigs were used to search the WGS databases. For chimpanzee, we required that hits be at least 100 bp in length with 97% sequence identity. For orangutan, we used a reduced threshold of 100 bp and 95% sequence identity. We found sequence matches for 68% (1,599/2,363) of the contigs in chimpanzee and for 52% (1,217/2,363) in orangutan, with 45% (1,071/2,363) found in both species. Interestingly, only 62% (989/1,599) of the sequences with matches against PTR sequence data were found by searches against both the genome assembly and the WGS reads (Figure 5.1).

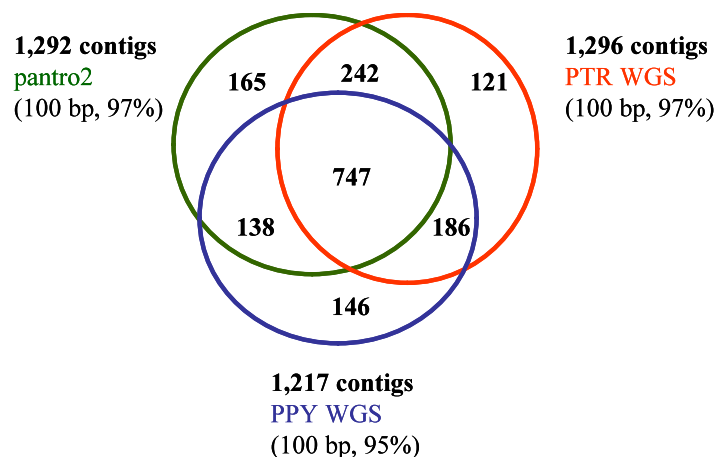

**Figure 5.1** BLAST searches of 2,363 novel sequence contigs. The contigs were searched against the chimpanzee genome assembly (pantro2) and individual WGS reads from chimpanzee (PTR) and orangutan (PPY). Contigs were RepeatMasked before searching against WGS databases.

As a further test we performed an arrayCGH experiment using DNA from a single chimpanzee. Based on the single-channel intensity data, 84% (1,985/2,363) of the contigs have an estimated copy number of at least 1.0 in chimpanzee. This includes 85% (1,361/1,599) of the contigs with matches to chimpanzee genome sequence data, as well as an additional 624 contigs. Combining array results with the sequence searches we find evidence for 94% (2,223/2,363) of the contigs in chimpanzee and 96% (2,266/2,363) in either chimpanzee or orangutan.

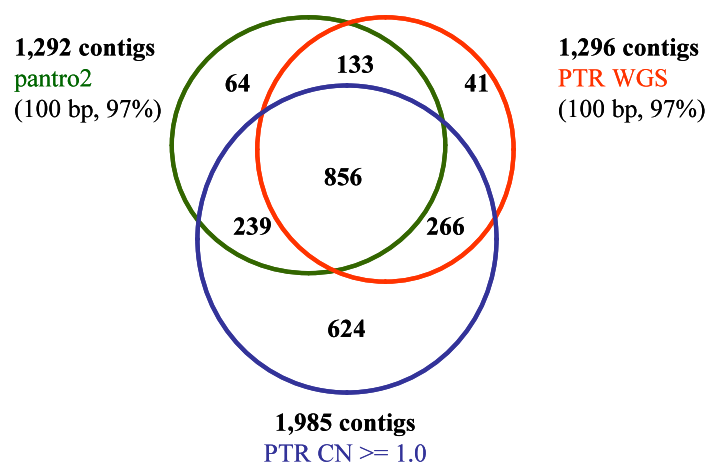

**Figure 5.2** Comparison of 2,363 contigs with chimpanzee sequence data and array intensity.

## 6. Polymorphism analysis of novel sequences

We assessed the polymorphism of the 2,363 contigs that passed all arrayCGH and contaminant criteria among 28 unrelated HapMap samples hybridized against a common

female reference (sample NA15510, the source of the G248 fosmid library). We identified polymorphic contigs using two different approaches.

| Sample ID | Population | Sex                       |
|-----------|------------|---------------------------|
| NA10847   | CEU        | Female                    |
| NA10851   | CEU        | Male                      |
| NA11832   | CEU        | Female                    |
| NA11840   | CEU        | Female                    |
| NA11993   | CEU        | Female                    |
| NA12004   | CEU        | Female                    |
| NA12156   | CEU        | Female                    |
| NA12813   | CEU        | Female                    |
| NA12878   | CEU        | Female                    |
| NA18552   | JPT+CHB    | Female                    |
| NA18555   | JPT+CHB    | Female                    |
| NA18564   | JPT+CHB    | Female                    |
| NA18573   | JPT+CHB    | Female                    |
| NA18942   | JPT+CHB    | Female                    |
| NA18947   | JPT+CHB    | Female                    |
| NA18956   | JPT+CHB    | Female                    |
| NA18980   | JPT+CHB    | Female                    |
| NA18502   | YRI        | Female                    |
| NA18507   | YRI        | Male                      |
| NA18517   | YRI        | Female                    |
| NA18523   | YRI        | Female                    |
| NA18861   | YRI        | Female                    |
| NA19102   | YRI        | Female                    |
| NA19116   | YRI        | Female                    |
| NA19129   | YRI        | Female                    |
| NA19132   | YRI        | Female                    |
| NA19172   | YRI        | Female                    |
| NA19240   | YRI        | Female                    |
| NA15510   | Unknown    | Female (reference sample) |

**Table 6.1** Human samples used in arrayCGH analysis.

### *Noise-multiplier approach*

For this approach we used the median probe log<sub>2</sub> ratio for each contig for each sample. For each sample we compared the median contig log<sub>2</sub> value with the average of the median contig log<sub>2</sub> values of the self-self hybridizations. If the difference between the sample log<sub>2</sub> and the self-self log<sub>2</sub> is at least N times greater than the root-square sum of the standard errors of the self-self and the sample hybridizations, we labeled a sample as being a gain or loss, as appropriate. Specifically, for each contig *c* and sample *i* we determined:

$M_{i,c}$  : the median log<sub>2</sub> ratio of the probes in contig *c* for sample *i*

$E_{i,c}$  : the standard error of the log<sub>2</sub> ratios measured for each probe in contig *c* in sample *i*

- $S_c$  : the mean of the median log2 ratios calculated for contig  $c$  from all self-self experiments
- $E_{r,c}$  : the standard error of the log2 ratios measured for each probe in contig  $c$  in the self-self experiments
- $N$  : the noise-multiplier threshold

Then, if  $M_{i,c} > S_c + N * (E_{i,c}^2 + E_{r,c}^2)^{0.5}$  we labeled sample  $i$  as being a ‘gain’ for contig  $c$  and if  $M_{i,c} < S_c - N * (E_{i,c}^2 + E_{r,c}^2)^{0.5}$  we labeled sample  $i$  as being a ‘loss’ for contig  $c$ . For this analysis, we used a noise multiple value of  $N=3$ , a threshold determined based on comparisons with intervals that clustered into distinct copy-number classes (described below).

This method produces a matrix of trinary values, each of which corresponds to the direction of each sample with respect to the reference state. These are interpreted as higher copy number, lower copy number or same copy number as the reference. Such data can be used to crudely estimate the polymorphism for the sample if it is assumed that the reference is in a well-defined common state. However, the noise across samples may appear as different copy number states. An important limitation of this approach is the absence of the assignment of individual genotypes. Also, this approach cannot discriminate between different copy-number states when all samples are higher or all are lower than the reference state. Nevertheless, using this method, 38% (890/2,363) of the contigs are identified as polymorphic among the 28 unrelated HapMap samples (Supplementary Table 5). Limiting analysis to the 26 unrelated females, this approach identifies 35% (834/2,363) as polymorphic.

### ***Contig genotyping based on cluster fitting***

Before summarizing the measurements for each contig, the individual probes with similar profiles across the samples are clustered using the CAST algorithm<sup>5</sup> using the Pearson correlation to compute similarity between probes. The CAST algorithm identifies clusters that have an average similarity between probes above a given threshold. An iterative approach is used to find the largest cluster with the highest clustering threshold. For each contig, an initial similarity threshold of 0.95 is applied. If no cluster containing more than 40% of the probes is found, the threshold is relaxed in increments of 0.05 until the largest cluster that has at least 40% of the probes is found, or until a threshold of 0.5 is reached, whichever comes first. If a large cluster is not found with at least 40% of the probes or a minimum of three probes, then all the probes are used for subsequent quantification over the contig. Using this approach, 840 (36%) of the 2,363 contigs were clustered, with an average of 64% of the probes clustered per clustered interval. The number of probes quantified is 30,469 (89%) of the total of 34,276 probes that pass the previous filters.

Using the probe sets identified by the above clustering procedure, median log2 ratios and signals are calculated for each sample and each contig. Median log2 ratios are then clustered across the collection of samples<sup>11</sup> and absolute copy-numbers are assigned to those contigs that cluster into distinct log-ratio clusters. This is done by fitting the median cluster values to the log2 ratios of distinct small copy numbers corresponding to states for

both the samples and the reference (see Figure 2 in the main manuscript). This procedure is applied to contigs where the reference sample is not homozygously deleted. In cases where it is determined that the reference sample represents a homozygous deletion, based on an analysis of the reference channel signal level and the log ratios, copy numbers are assigned using a single-color approach. This approach replaces sample log<sub>2</sub> ratios with the logs of the ratios of the sample signals to the median of those signals that are significantly above zero and then applies the fitting strategy described above.

Using this approach, we identified 518 contigs that are fitted to a copy-number state. Of these, 461 contigs (20% of the total 2,363 contigs) are fitted to two or more distinct states and are considered to be polymorphic. The copy numbers for these 461 cluster-fitted contigs are provided in Supplementary Table 6. Limiting analysis to the 26 unrelated females, this approach identifies 404 contigs as polymorphic.

### ***Comparison of alternative polymorphism calling schemes***

Comparing the results of these two approaches shows that only 49% (443/908) of the contigs identified as polymorphic were labeled as such by both methods (Figure 6.1). This is to be expected since only 22% (518/2,363) of the contigs could be fitted to a defined copy-number state. We note that 96% (443/461) of the contigs fitted to distinct copy-number states were also identified as polymorphic by the noise-multiplier method.

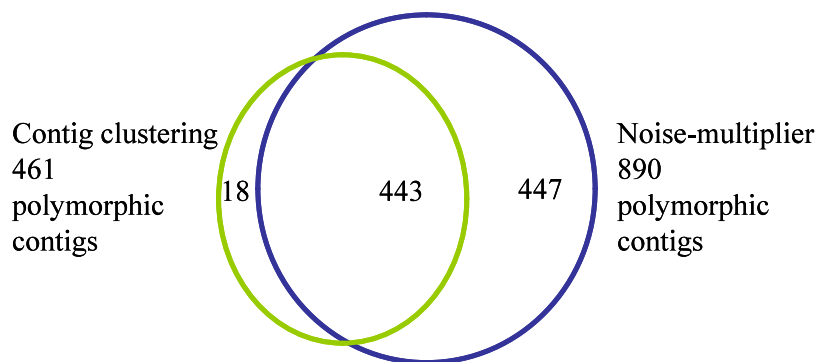

**Figure 6.1** Comparison of contigs identified as polymorphic by both calling strategies.

## **7. High copy-number contigs**

Cluster analysis identified 48 high copy-number contigs that showed a correlated radiometric pattern across samples consistent with a high copy number.

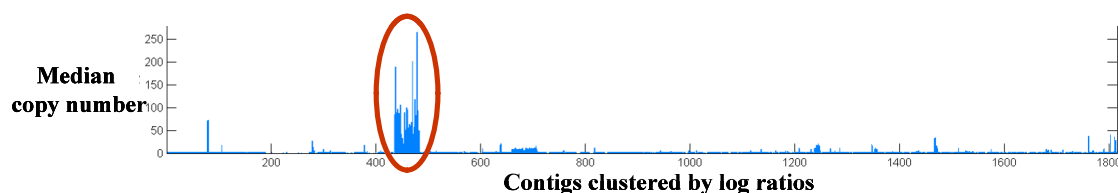



**Figure 7.1** Identification of high copy-number cluster. Contigs were clustered based on the pattern of log<sub>2</sub> ratios across samples (only clusters with two or more contigs are shown). The height of each bar corresponds to the median copy number estimated for each contig. The cluster consisting of 48 high copy contigs is circled in red.

Clones corresponding to 10 of these 48 high copy-number contigs have been mapped by FISH to the p-arms of the acrocentric chromosomes, with one mapping to the subtelomeric region on 10p. BLAST searches indicate that 20/48 contigs match the 43-kb rDNA repeat unit (U13369; >98% identity), and 28/48 contigs match sequenced BAC clones assigned to 22p. These results suggest that the high copy-number contigs largely correspond to sequences that are present in multiple copies on the p-arms of acrocentric chromosomes; with 20 of the contigs corresponding to sequences not represented in existing 22p BAC sequences<sup>3</sup>.

## 8. OligoFISH experiments

We performed FISH using probes created from libraries of synthesized oligonucleotides targeted against the sequence of three insertion loci (AC217954, AC222569 and AC208058). The use of oligonucleotide-based probes as opposed to labeled fosmids permits the targeting of just the insertion sequence. Metaphase FISH confirmed the predicted genomic location for all three sequences. Each insertion sequence was interrogated for copy-number polymorphism by multiple individual sequence contigs. Two of the insertions (AC217954 and AC222569, Tables 8.1 and 8.2) showed consistent predicted copy numbers using the modal-clustering approach across all contigs and were confirmed by oligoFISH in four samples. In contrast, the six contigs assigned to AC208058 were not fitted into distinct copy-number classes. These contigs have an inconsistent status with three of the six contigs identified as polymorphic using the noise-multiplier approach. OligoFISH targeting this 5.4-kb insertion indicates a diploid copy number of 2 for three analyzed individuals (NA18507, NA18573 and NA18523).

| Sample  | Predicted CN<br>(3 contigs) | oligoFISH CN |
|---------|-----------------------------|--------------|
| NA19240 | 0                           | 0            |
| NA12878 | 1                           | 1            |
| NA15510 | 1                           | 1            |
| NA18555 | 2                           | 2            |

**Table 8.1** Results of oligoFISH analysis for insertion AC217954. This insertion is represented by three sequence contigs, each of which has consistent called copy numbers.

| Sample  | Predicted CN<br>(3 contigs) | oligoFISH CN |
|---------|-----------------------------|--------------|
| NA12156 | 0                           | 0            |
| NA18942 | 2                           | 2            |
| NA15510 | 1                           | 1            |
| NA12878 | 1                           | 1            |

**Table 8.2** Results of oligoFISH analysis for insertion AC222569. This insertion is represented by three sequence contigs, each of which has consistently called copy numbers.

## 9. Analysis of sequenced clones

Breakpoints were identified for the 222 sequenced fosmid clones based on a comparison with the build36 genome reference (Supplementary Table 10). First, the program *miropeats*<sup>12</sup> was used to identify approximate breakpoint positions (Figure 9.1).

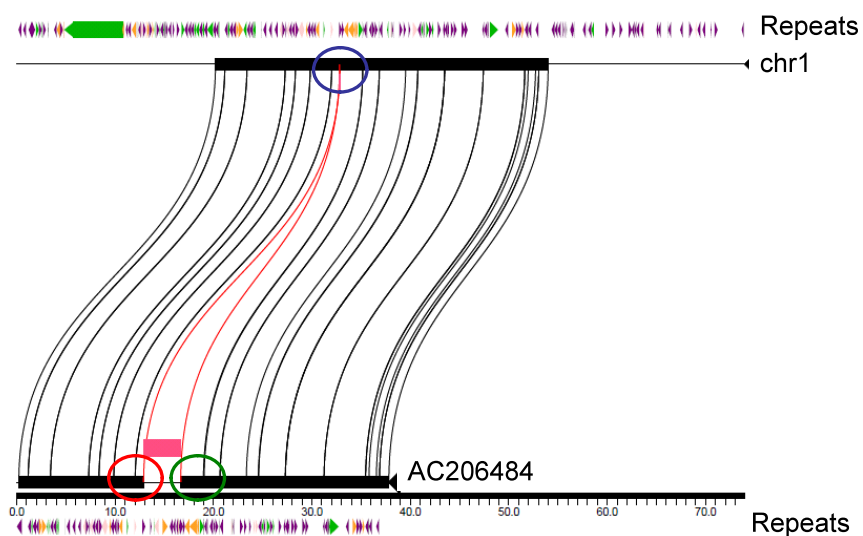

**Figure 9.1** Initial breakpoint identification. The sequence of clone AC206484 is compared with chr1 using the program miropeats. Black lines indicate segments of matching sequence between the clone and the chromosome. An insertion in the clone, relative to the chromosome sequence, is identified by the magenta box. The curved magenta lines depict the approximate breakpoints. Sequences matching the left insertion breakpoint (red circle), the right insertion breakpoint (green circle), and the corresponding segment from the deletion haplotype (blue circle) are indicated.

The segments from the two edges of the insertion were extracted and aligned in turn with the corresponding sequence from the deletion haplotype. These alignments were then combined to form a three-way alignment. Using this alignment, the innermost positions at which the deletion fragment is a better match to the ‘left’ or ‘right’ side of the insertion region (Figure 9.2) are identified. In this manner, breakpoints are determined at nucleotide-level resolution. Additionally, comparisons of the sequence around the breakpoints are performed to identify additional segments of sequence homology encompassing the identified breakpoints.

```

left      GGGCCTGGCGCGTGGCTCATGCCTGTAATCCAGCACTTTGGGAAGCCGAGGTGGGCGG
deljunct  GGGCCTGGCGCGTGGCTCATGCCTGTAATCCAGCACTTTGGGAAGCCGAGGTGGGCGG
right     -GGCCAGGTACAGTGGCTCACGCCTGTAATCCAGCACTTTGGGAGGCCGAGGCAGGTGG
          1***1*11*1*****1*****1*****1*****11*1**

left      ATCACTTGAGGTCAGGAGTTCGAGACCAGTCTGTCCAACATGACGAAACCCCGTCTCTAC
deljunct  ATCACTTGAGGTCAGGAGTTCGAGACCACTCCTATCTAACACAGTGAAACCCCGTCTCTAC
right     ATCA--TGAGGTCAGGAGATCGAGACCACTCCTATCTAACACAGTGAAACCCCGTCTCTAC
          ****11*****1*****22**2**2***222*****2*****

left      TAAAAATGC-AAAACCTTAGCCGGGCGTGGTGGTGGGCACCCATAATCCAGCTACTTGGG
deljunct  TAAAAATACAAAAAATTAGCCAGGCGTGGTGGCGGGTGCTTGTAGTTCCAGCTACTTGGG
right     TAAAAATACAAAAAATTAGCCAGGCGTGGTGGCGGGTGCTTGTAGTTCCAGCTACTTGGG
          *****2*2***2*****2*****2***22*222**2*2*****

```

**Figure 9.2** Breakpoint alignment. The resulting alignment for the sequences identified in Figure 9.1 is shown. A ‘1’ indicates a match between the sequence from the deletion fragment (‘deljunct’) and the left-insertion sequence. A ‘2’ indicates a match between the sequence from the deletion fragment and the right-insertion sequence. The variant breakpoints are defined by the innermost positions of clear match to the left or right segments (red and green aligned nucleotides, reported in Supplementary Table 10). In this example, these two positions are separated by 9 bp that perfectly matches at both insertion breakpoints (blue text). In Supplementary Table 10 this variant is reported as being class ‘c1’, indicating 9 bp of perfect identity. In contrast, a ‘c3’ variant contains 0 bp of identity and a ‘c2’ variant contains unmatched sequence on the deletion haplotype that is not present at either edge of the insertion. The dark grey shading indicates the extent of additional matching sequence at the two breakpoints. In this example, the additional homology extends for 284 bp and has a sequence identity of 84.15%.

The breakpoint coordinates identified from the alignment are used to define the size and extent of each variant. In the case of OEA clones, the matching segment at the other end of the insertion is not captured. Therefore, only one coordinate could be identified at the sequence level. The images shown in Figure S4 depict the bp-level resolved breakpoints as well as the additional extent of breakpoint homology and other annotations. An example for clone AC206484 is shown in Figure 9.3.

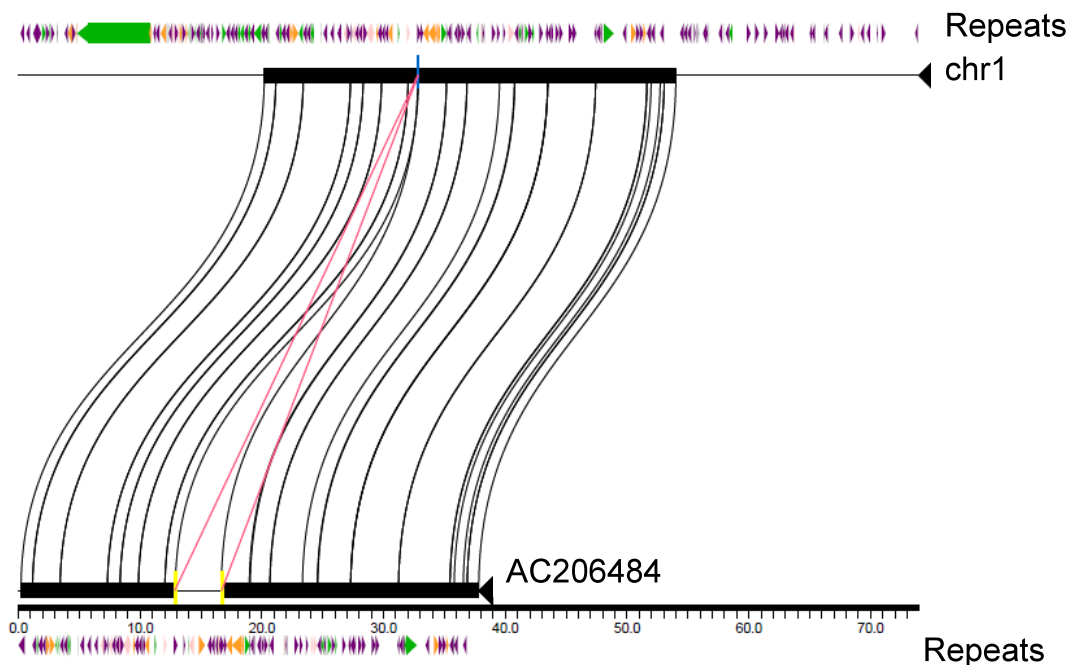

**Figure 9.3** Final annotated breakpoint image. The final annotated breakpoint image for AC206484 is shown. The image is similar to that shown in Figure 9.1. However, the straight magenta lines correspond to the breakpoint positions identified by sequence alignment (the red and green position in Figure 9.2). The yellow boxes at the two edges of the insertion correspond to the 284 bp of matching (84.15% identity) sequence found between the two insertion edges. The thin blue box at the breakpoint on chr1 represents the 9 bp of perfectly matching sequence found on each side of the insertion and present on the deletion haplotype.

### *Variant genotyping using unique breakpoint k-mers*

The sequence-resolved breakpoints from 152 insertions sequenced in individual fosmid clones were used to identify diagnostic k-mers specific to each variant. Comparison of the sequenced clones identifies three breakpoint segments: one on the build36 chromosome sequence (the ‘deletion’ allele) and two on the sequenced fosmid (the ‘insertion’ allele). A set of diagnostic k-mers was defined by searching all overlapping k-mers from each breakpoint against sequence data from the build36 assembly and the collection of insertion-containing fosmids. For this analysis, a k-mer size of 36 and one substitution was permitted in the searching. In order to be considered diagnostic, a deletion k-mer must have a single match (including up to one substitution) to the build36 sequence and no matches against the fosmid sequences. Insertion k-mers were required to have a single match against the fosmid sequences and no matches against the build36 genome sequence. Using these criteria, 71% (108/152 loci) of the loci were represented by at least one deletion k-mer and one insertion k-mer (Figure 6B).

Next, Illumina sequence data<sup>9</sup> from NA18507 was searched against this collection of k-mers using mrsFAST (<http://mrfast.sourceforge.net>). Both the Illumina reads and targeted

k-mers had a length of 36, and only perfect matches were recorded. The normalized number of reads supporting each allele is first determined since the deletion and insertion alleles may have a different number of diagnostic k-mers:

$$I = \frac{R_I}{T_I}$$

$$D = \frac{R_D}{T_D}$$

where  $T_I$  and  $T_D$  are the number of diagnostic k-mers for the insertion and deletion alleles of a given variant and  $R_I$  and  $R_D$  are the number of reads that match the diagnostic insertion or deletion k-mers. A breakpoint search score is then calculated using these normalized support counts:

$$\text{breakpoint search score} = 2 \left( \frac{I}{I + D} \right)$$

A score of 2.0 will be calculated if there are no reads that match the deletion k-mers. Similarly, a score of 0.0 will result if there are no reads that match the insertion k-mers. If there are no reads that match either insertion or deletion k-mers then the breakpoint score is undefined and no genotype is determined. To define an integer genotype, the breakpoint search score is simply rounded. That is, variants having a score  $\geq 0.5$  and  $\leq 1.5$  are assigned to the heterozygous (copy number=1) class.

Genotypes could be determined for 106 of the 108 variants that had diagnostic k-mers using Illumina sequence data from NA18507. The scores are reported in Supplementary Table 14. A histogram of these scores is shown in Figure 9.4.

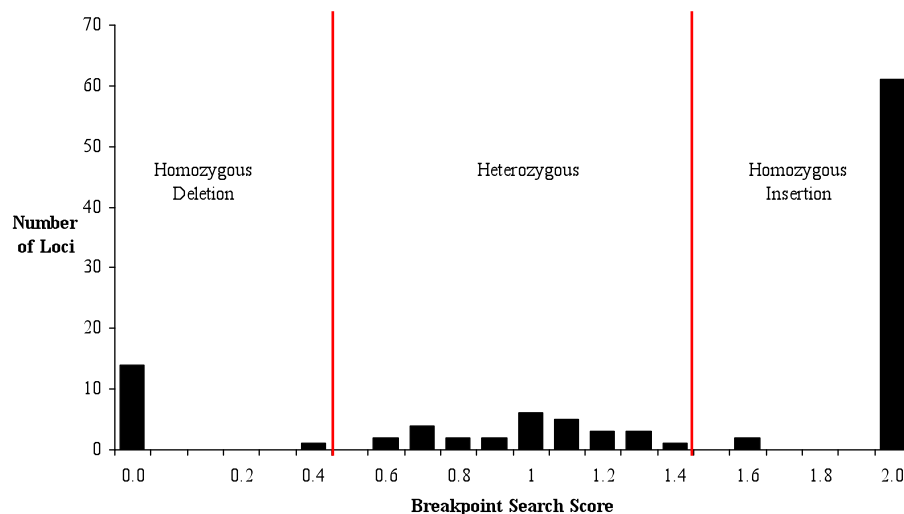

**Figure 9.4** Breakpoint search score distribution for sample NA18507. A score was determined for sample sequenced variants in sample NA18507. Genotypes can be assigned by applying a score threshold of 0.5 and 1.5 (red lines). 53 of these variants were also assigned a genotype by arrayCGH. Applying these score thresholds results in 94.3% (50/53 variants) genotype agreement.

### *Capturing larger insertions using OEA clones*

OEA clones that extend into an insertion can be used to capture the sequence of insertions that are greater than the 40-kb clone size. The analyzed sequences include eight loci flanked by sequenced OEA clones. OEA clone sequence overlaps indicate that the complete insertion sequence has been captured for four of these loci (Table 9.1).

| Position (Mb) | Clones                       | Entire Insertion Captured | Insertion Size (bp) |
|---------------|------------------------------|---------------------------|---------------------|
| chr3:57.3     | AC232304, AC231288           | Yes                       | 48,436              |
| chr6:51.2     | AC233754, AC231198           | No                        | > 59,325            |
| chr6:107.4    | AC233764, AC231117           | No                        | > 75,851            |
| chr6:119.2    | AC234039, AC231118           | Yes                       | 65,026              |
| chr10:27.6    | AC231273, AC226171           | Yes                       | 47,298              |
| chr18:63.2    | AC231988, AC231982           | No                        | >19,462             |
| chr19:21.5    | AC232224, AC236073, AC232302 | No                        | > 38,556            |
| chr20:53.5    | AC232301, AC232307           | Yes                       | 41,476              |

**Table 9.1** Summary of large insertion flanked by sequenced OEA clones. Coordinates are given relative to the build36 genome assembly.

## **10. Number of insertions represented in each sample**

We estimated the yield of new insertion sequence likely to be discovered in additional genomes by considering how many of the 720 insertion loci were found in only a one of the nine individuals we used for sequence discovery. Because of the comparatively low

sequence coverage of each genome (approximately 0.3X), not all individuals containing an insertion actually contributed unmapped end-sequences towards its discovery. We therefore combined the library source information of the individual clones used to discover each locus with arrayCGH genotyping results for the sequence contigs to determine which individuals contain each insertion. 56% of the total loci (401/720) were present in all nine individuals. This includes 240 loci that are not polymorphic among the 28 individuals analyzed by arrayCGH. 69 of the loci were present in just one of the nine analyzed individuals (Figure 10.1). If analysis is limited to the 400 loci with anchored positions in the euchromatin, we find that only 11 loci are present in only one of the individuals used for discovery (Figure 10.2). Thus, although additional genome projects are likely to uncover a large number of new insertions (as in the 7,240 single unassembled anchored sequence traces we identified, Supplementary Table 4), our results indicate that the majority of large novel insertion sequences have been captured using these nine individuals.

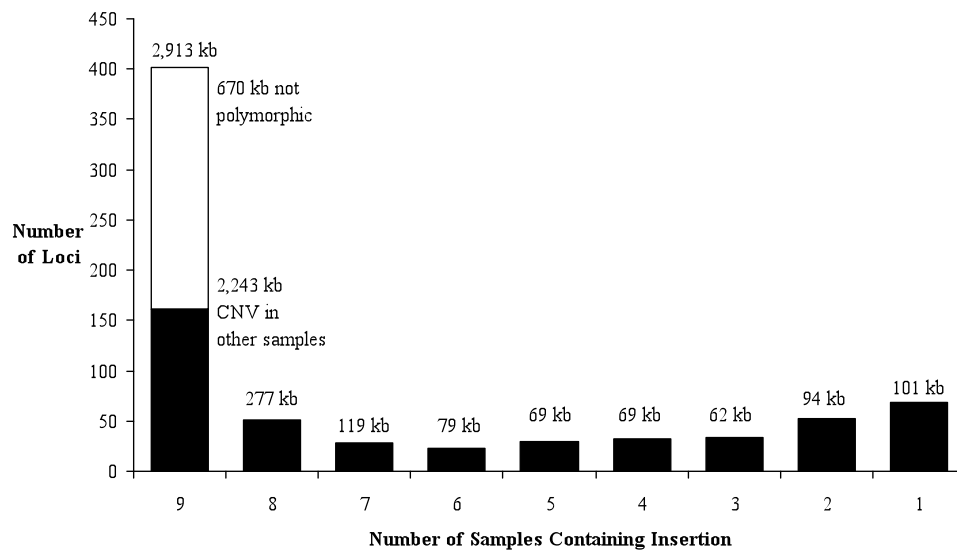

**Figure 10.1** Distribution of 720 loci among nine individuals used for sequence discovery. The height of each bar indicates the number of loci found in exactly 1, 2, 3, etc. of the 9 individuals used for sequence discovery. There were 161 loci present (in at least one copy) in all nine individuals that were also identified as polymorphic. The white bar corresponds to the 240 loci that were not found to be polymorphic based on analyses of 28 individuals. An estimate of the total insertion size is given above each bar. This estimate is derived by summing the sizes of the individual contigs contributing to each locus and therefore should be considered to be a lower-bound estimate of the true insertion size.



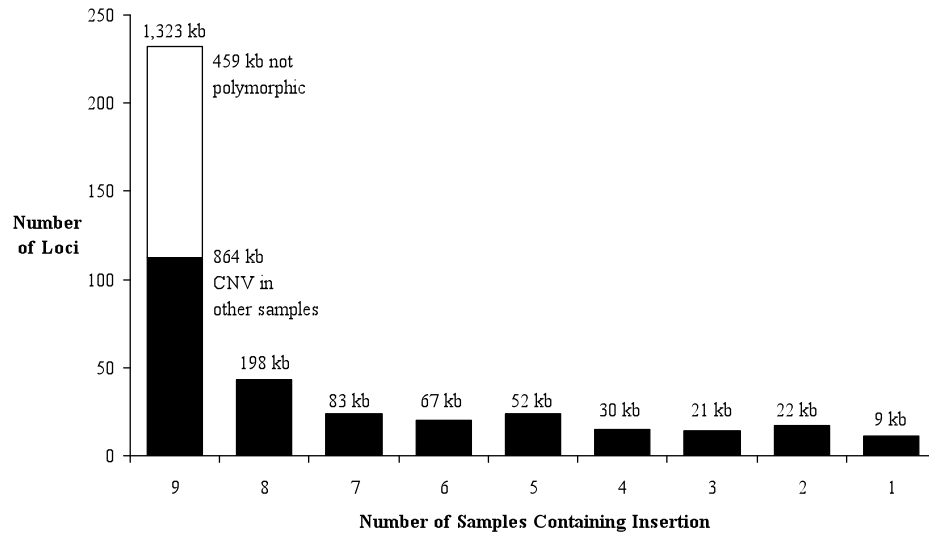

**Figure 10.2** Distribution of 400 loci having an anchored map position among nine individuals used for sequence discovery. 11 loci were found in only a single individual. Insertion sizes were calculated as in Figure 10.1

## 11. Comparison with Illumina SOAP *de novo* assembly

We downloaded the novel insertion data reported in Li et al.<sup>13</sup> from <http://yh.genomics.org.cn/download.jsp> and made several comparisons with the data sets described in the manuscript.

### *Comparison with individual OEA end sequences*

1,126 of the 7,240 OEA end sequences that passed our filters were derived from sample NA18507 (ABC8 clone library). We searched these 1,126 sequences against the novel-sequence contigs assembled from the Illumina data. Requiring a match of 100 bp with at least 98% identity, we find that 80 of these sequences have at least a partial match with novel sequences assembled from the YH genome and 108 have a match to the NA18507 genome. The Li et al. next-gen data set consists of contigs  $\geq 100$  bp that do not match against the build36 assembly. Our analysis has been largely focused on the bd35 assembly, however we note that only 19 of the 1,126 ABC8 OEA sequences map onto bd36, indicating that this does not account for the discrepancy. We therefore conclude that we have identified a substantial amount of additional sequence in NA18507, although we recognize that Li et al. have identified many shorter sequences that we could not detect based on our 0.3X sequence coverage of this genome.

### *Comparison with assembled novel insertion contigs*

We also compared the 2,363 assembled contigs, which include contributions from nine individuals, with the sequences reported in Li et al. We find that 68% of our contigs (1,602/2,363) have at least a partial match to the Li NA18507 data set.

| <i>Criteria</i>        | <i>Number of Contigs</i> |
|------------------------|--------------------------|
| Match to NA18507       | 1,602                    |
| Match to YH            | 1,528                    |
| Match to NA18507 or YH | 1,680                    |

**Table 11.1** Comparison of 2,363 assembled contigs with the Li et al. NA18507 and YH data sets.

Often, the Li sequences only represented a portion of the fosmid ESP contigs. We quantified this by calculating the fraction of each ESP-assembled contig that matched sequence in the Li data set.

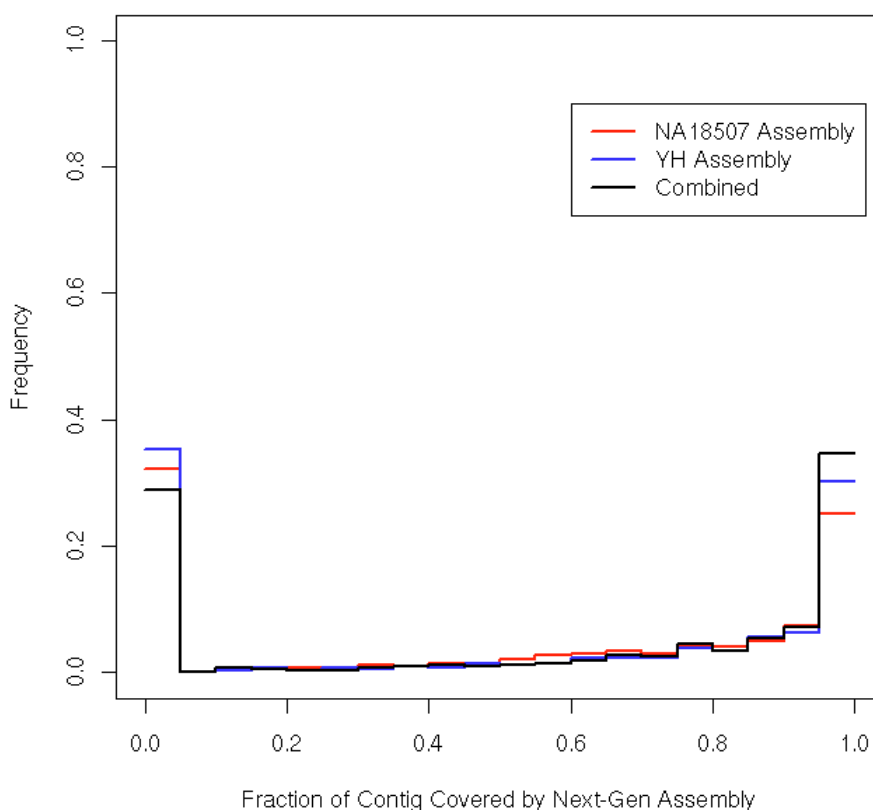

**Figure 11.1** Histogram of the fraction of assembled OEA contigs that match sequences assembled by Li et al.

For the Li NA18507 data (the red line in Figure 11.1) we find that 32% of fosmid ESP contigs are not covered at all (761/2,363), and that 25% (591/2,363) have coverage of at least 95%. If this calculation is limited to only the 1,602 contigs with at least some coverage in the Li et al. NA18507 data set, we find that 37% (591/1,602) have a coverage of at least 95% and that the median fraction covered is 89%.

From these findings, we conclude that assembly of next-generation sequencing reads identifies a fraction of the sequences detected by fosmid ESP assembly but does not recapitulate the complete length of the insertions.

### ***Comparison with sequenced NA18507 insertions***

Additionally, we compared the Li et al. NA18507 sequences with insertion sequences obtained from 21 fully sequenced NA18507 fosmid clones. 17 of the 21 NA18507 insertions have at least some representation in the Li et al. NA18507 data set. Three of the four missing insertions involve GC-rich low-complexity sequence or satellite sequences. The fourth (clone AC233720) consists of LINE derived sequences as well as other elements.

The mean covered fraction of the 17 matching insertion sequences is 65%. We observe that 7 of the 17 fosmid insertions have matches to sequence from Li et al. that are assigned to more than one scaffold. The representation of contiguous sequence across multiple scaffolds would severely limit an understanding of the long-range continuity and structural organization of these sequences.

| Clone Accession | Chrm  | Position (bd36) | Clone Type  | Length of Cloned Insertion Sequence | NA18507 Illumina coverage | NA18507 Contigs | NA18507 Scaffolds |
|-----------------|-------|-----------------|-------------|-------------------------------------|---------------------------|-----------------|-------------------|
| AC225822        | chr10 | 79,360,990      | Not spanned | 18,398                              | 0.0%                      | 0               | 0                 |
| AC231414        | chr10 | 121,177,030     | Not spanned | 24,063                              | 71.0%                     | 26              | 5                 |
| AC213240        | chr11 | 55,900,146      | Spanned     | 7,491                               | 84.9%                     | 3               | 1                 |
| AC225617        | chr11 | 71,989,867      | Not spanned | 1,413                               | 0.0%                      | 0               | 0                 |
| AC234852        | chr12 | 1,047,608       | Spanned     | 6,926                               | 61.0%                     | 9               | 2                 |
| AC234232        | chr14 | 100,493,647     | Not spanned | 1,828                               | 87.6%                     | 2               | 1                 |
| AC234142        | chr16 | 24,791,820      | Not spanned | 2,576                               | 44.8%                     | 4               | 2                 |
| AC225984        | chr16 | 34,775,185      | Not spanned | 7,220                               | 64.0%                     | 5               | 1                 |
| AC231982        | chr18 | 63,272,202      | Not spanned | 5,487                               | 89.4%                     | 6               | 1                 |
| AC232302        | chr19 | 21,543,554      | Not spanned | 10,943                              | 32.0%                     | 7               | 4                 |
| AC236073        | chr19 | 21,548,698      | Not spanned | 27,613                              | 40.9%                     | 9               | 4                 |
| AC231980        | chr2  | 117,424,590     | Not spanned | 3,638                               | 69.3%                     | 2               | 1                 |
| AC226495        | chr2  | 157,901,100     | Not spanned | 17,600                              | 0.0%                      | 0               | 0                 |
| AC233721        | chr20 | 42,087,581      | Not spanned | 1,415                               | 100.0%                    | 1               | 1                 |
| AC232301        | chr20 | 53,556,647      | Not spanned | 33,937                              | 76.0%                     | 10              | 2                 |
| AC231189        | chr21 | 23,682,295      | Not spanned | 1,002                               | 95.1%                     | 2               | 1                 |
| AC233768        | chr21 | 43,287,469      | Not spanned | 1,147                               | 39.4%                     | 1               | 1                 |
| AC225889        | chr4  | 62,460,282      | Not spanned | 21,777                              | 6.0%                      | 6               | 5                 |
| AC234851        | chr5  | 124,794,281     | Not spanned | 7,929                               | 61.9%                     | 9               | 1                 |
| AC233722        | chr8  | 141,042,221     | Not spanned | 1,411                               | 83.3%                     | 2               | 1                 |
| AC233720        | chrX  | 129,102,314     | Not spanned | 19,486                              | 0.0%                      | 0               | 0                 |

**Table 11.2** Comparison of sequenced NA18507 insertions with the Li et al. contigs.

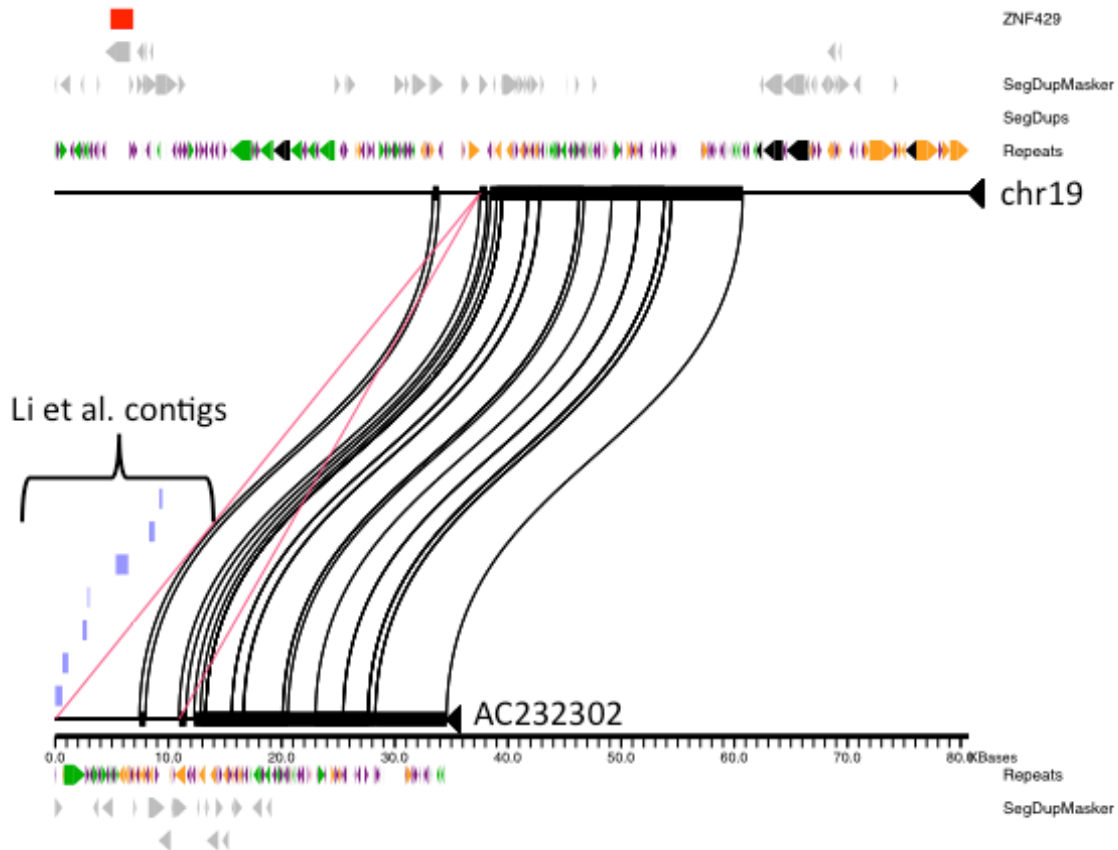

**Figure 11.2** Comparison of clone AC232302 with Li et al. NA18507 assembled contigs. The depicted clone extends 10.9 kb into an unspanned insertion on chr19. The purple rectangles represent the positions of NA18507 contigs from Li et al. mapped against the clone sequence. The seven mapped contigs from Li et al. represent 32% of the insertion sequence captured in the fosmid clone. These seven Li et al. contigs are assigned to four different scaffolds. This example illustrates a common problem in obtaining contiguity and correctly assigning location for novel insertions that are rich in repetitive or duplicated DNA.

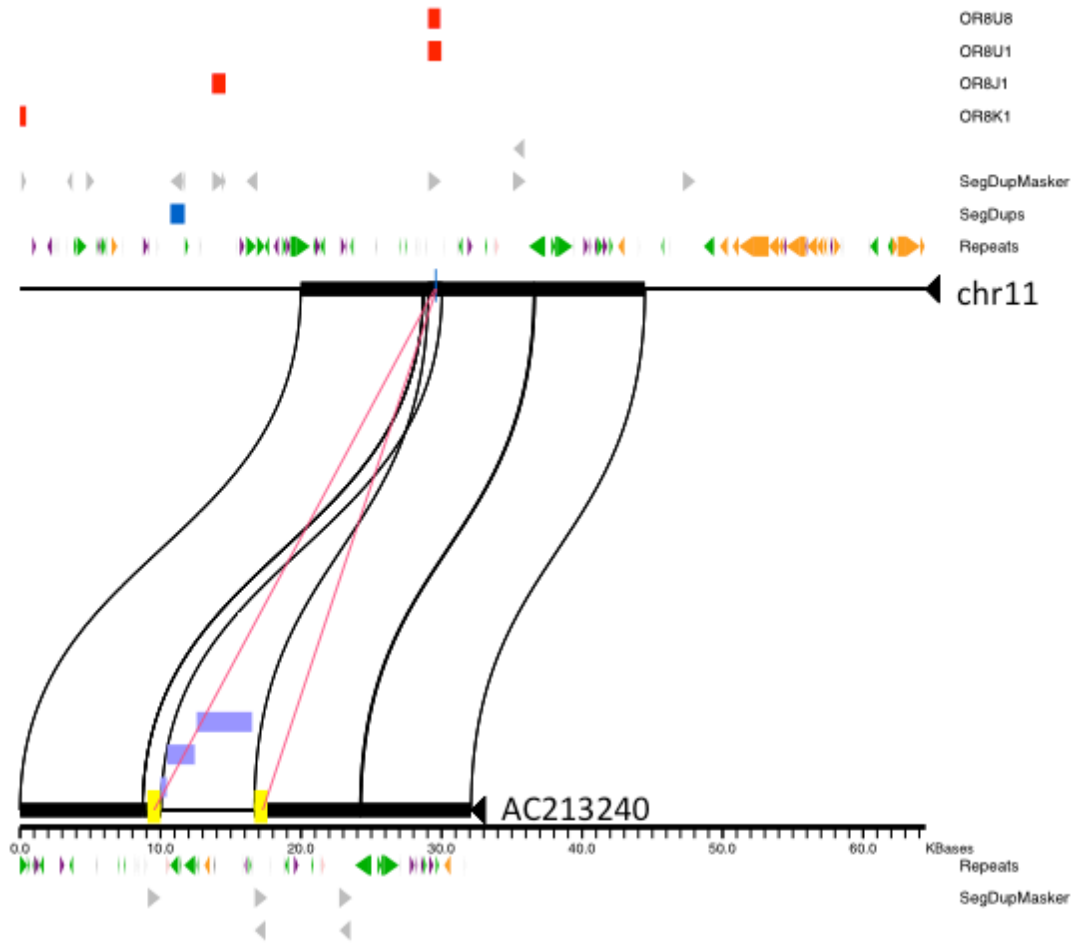

**Figure 11.3** Comparison of clone AC213240 with Li et al. NA18507 assembled contigs. This clone spans a 7.4 kb insertion on chr11. Three Li et al. contigs, assigned to a single scaffold, represent 85% of this insertion. This example illustrates the utility of next-gen *de novo* assembly for relatively unique regions.

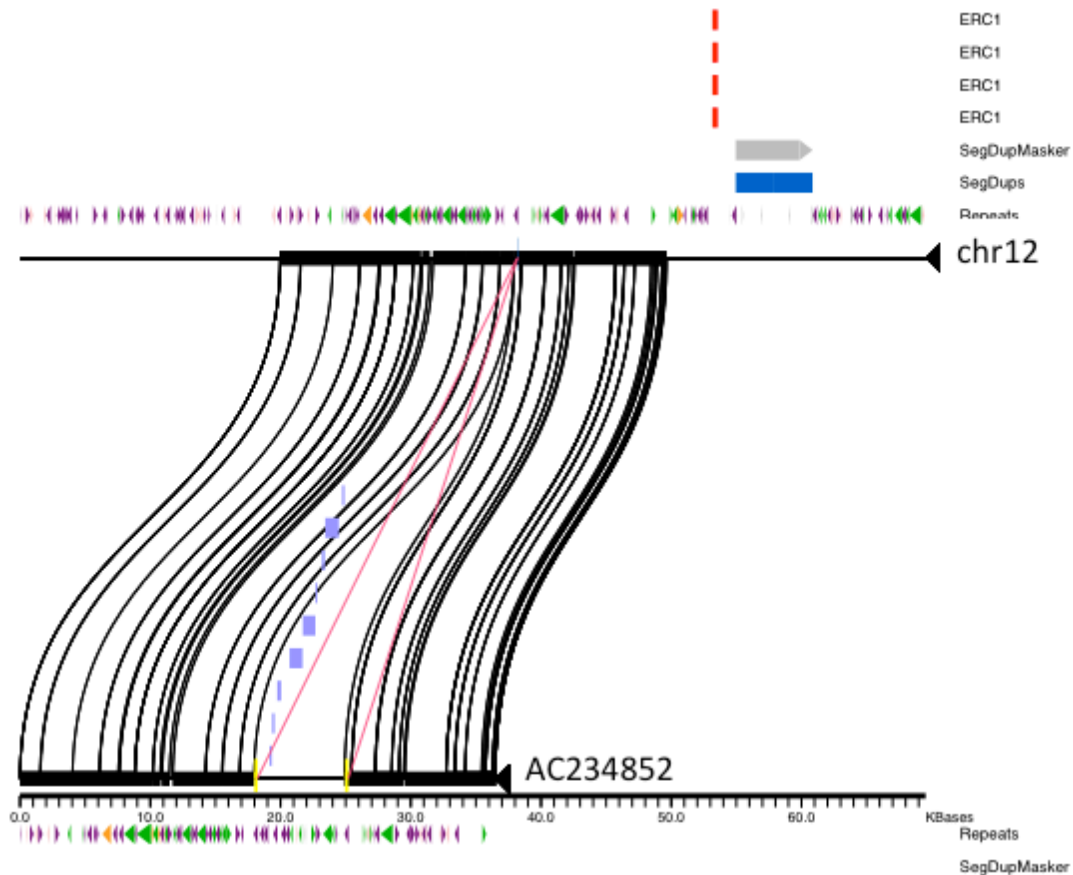

**Figure 11.4** Comparison of clone AC234852 with Li et al. NA18507 assembled contigs. This clone spans a 6.9-kb insertion on chr12. There are nine contigs from Li et al. that match this insertion. The nine contigs cover 61% of the insertion sequence and are assigned to two different scaffolds.

## 12. References

1. Bovee, D. et al. Closing gaps in the human genome with fosmid resources generated from multiple individuals. *Nat Genet* **40**, 96-101 (2008).
2. Kidd, J.M. et al. Mapping and sequencing of structural variation from eight human genomes. *Nature* **453**, 56-64 (2008).
3. Cole, C.G. et al. Finishing the finished human chromosome 22 sequence. *Genome Biol* **9**, R78 (2008).
4. IHMC A second generation human haplotype map of over 3.1 million SNPs. *Nature* **449**, 851-861 (2007).
5. Ben-Dor, A., Shamir, R. & Yakhini, Z. Clustering gene expression patterns. *J Comput Biol* **6**, 281-297 (1999).
6. Levy, S. et al. The Diploid Genome Sequence of an Individual Human. *PLoS Biol* **5**, e254 (2007).
7. Wheeler, D.A. et al. The complete genome of an individual by massively parallel DNA sequencing. *Nature* **452**, 872-876 (2008).
8. Wang, J. et al. The diploid genome sequence of an Asian individual. *Nature* **456**, 60-65 (2008).
9. Bentley, D.R. et al. Accurate whole human genome sequencing using reversible terminator chemistry. *Nature* **456**, 53-59 (2008).
10. Alkan, C. et al. Personalized copy number and segmental duplication maps using next-generation sequencing. *Nat Genet* **41**, 1061-1067 (2009).
11. Perry, G.H. et al. The fine-scale and complex architecture of human copy-number variation. *Am J Hum Genet* **82**, 685-695 (2008).
12. Parsons, J. Miropeats: graphical DNA sequence comparisons. *Comput Appl Biosci* **11**, 615-619 (1995).
13. Li, R. et al. Building the sequence map of the human pan-genome. *Nat Biotechnol* **28**, 57-63.
